# Supplementary material for: Transcription and Signaling Regulators in Developing Neuronal Subtypes of Mouse and Human Enteric Nervous System
Source: PubMed Central journal article supplement (PMC6381388; doi:10.1053/j.gastro.2017.10.005), 2018-02
Supplement: mmc3.pdf [file mmc3.pdf]

# SUPPLEMENTARY FIGURE 1

**A**

| Sample | Stage | Cell Type    | guts (no.) | cells (no.) | ng/ul | ul | RIN | BioAnalyzer |
|--------|-------|--------------|------------|-------------|-------|----|-----|-------------|
| S11:1  | E11.5 | Sox10+       | 64         | 18966       | 4,84  | 13 | 9,6 | OK          |
| S11:2  | E11.5 | Sox10+       | 51         | 19666       | 4,77  | 13 | 9   | OK          |
| S11:3  | E11.5 | Sox10+       | 56         | 17606       | 4,49  | 13 | 9,2 | OK          |
| S11:4  | E11.5 | Sox10+       | 74         | 21088       | 7,41  | 12 | 8,5 | OK          |
| S15:1  | E15.5 | Sox10+       | 3          | 30300       | 5,46  | 11 | 8,7 | OK          |
| S15:2  | E15.5 | Sox10+       | 3          | 29000       | 6,76  | 11 | 9,2 | OK          |
| S15:3  | E15.5 | Sox10+       | 3          | 37000       | 2,95  | 11 | 9,3 | OK          |
| S15:4  | E15.5 | Sox10+       | 3          | 39488       | 7,87  | 11 | 8,2 | OK          |
| W11:1  | E11.5 | ENS          | 17         | 17721       | 7,5   | 11 | 9   | OK          |
| W11:2  | E11.5 | ENS          | 29         | 19831       | 2,81  | 13 | 9,2 | OK          |
| W11:3  | E11.5 | ENS          | 26         | 25887       | 11,39 | 12 | 7,6 | OK          |
| C11:1  | E11.5 | Ctrl (Wnt1-) | 17         | 416800      | 33,68 | 33 | 7,4 | OK          |
| C11:2  | E11.5 | Ctrl (Wnt1-) | 29         | 329743      | 28,33 | 37 | 8,7 | OK          |
| C11:3  | E11.5 | Ctrl (Wnt1-) | 26         | 424000      | 65,5  | 24 | N/D | OK          |
| W15:1  | E15.5 | ENS          | 3          | 89700       | 16,32 | 11 | 8,6 | OK          |
| W15:2  | E15.5 | ENS          | 3          | 114700      | 27,98 | 11 | 8,5 | OK          |
| W15:3  | E15.5 | ENS          | 3          | 103777      | 14,73 | 11 | 7,3 | OK          |
| C15:1  | E15.5 | Ctrl (Wnt1-) | 3          | 952000      | 48,43 | 33 | 9,6 | OK          |
| C15:2  | E15.5 | Ctrl (Wnt1-) | 3          | 894999      | 53,93 | 37 | 7,8 | OK          |
| C15:3  | E15.5 | Ctrl (Wnt1-) | 3          | 722000      | 51,29 | 37 | 7,3 | OK          |

**D Bioanalysis**

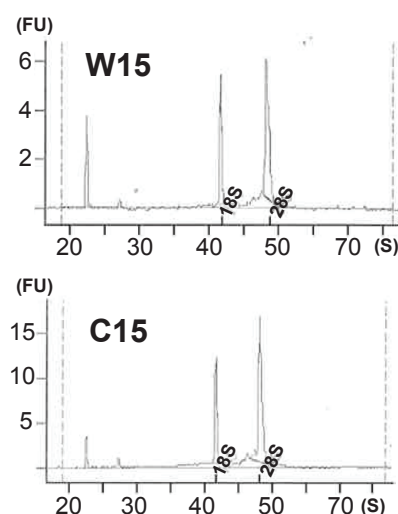

**B**

***Wnt1Cre x R26ReYFP* at E15.5**

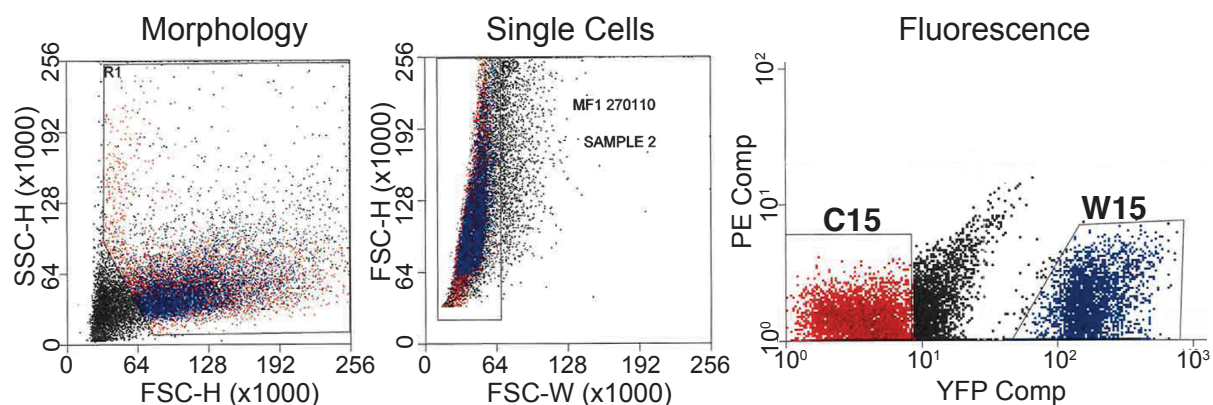

**C**

***Sox10CreER<sup>T2</sup> x R26ReYFP* at E15.5**

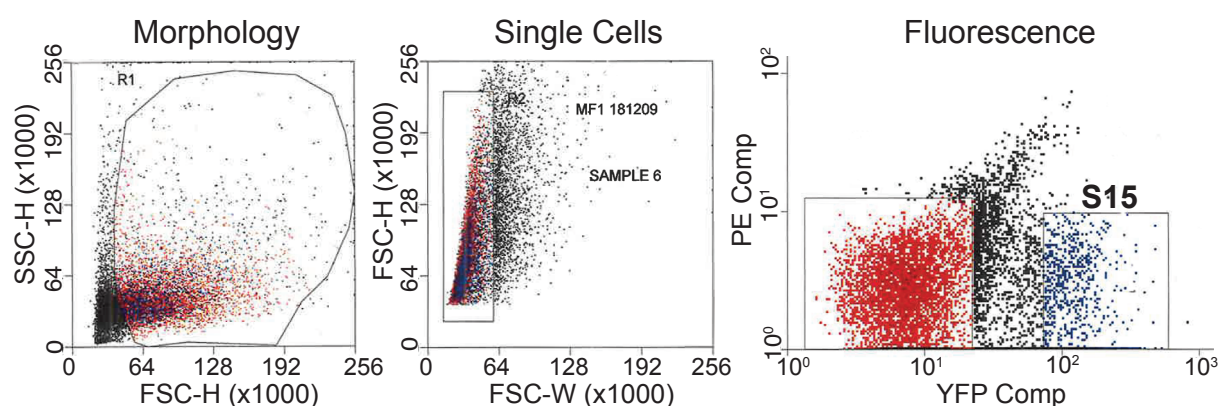

**Supplementary Figure 1: Preparation of cells and RNA used in microarrays.**

A) Summary of analyzed pooled samples, including starting material and amount /quality of retrieved RNA. Note that the same absolute amount of RNA from each sample was used to prepare cDNA to be hybridised on microarrays.

B,C) Examples of FACS sortings of YFP<sup>+</sup> or YFP<sup>-</sup> cells of one gut from each of the *Wnt1Cre-R26ReYFP* (B) and *Sox10CreER<sup>T2</sup>-R26ReYFP* (C) mouse lines.

D) Examples of RNA analysis using Bioanalyzer. RIN: RNA Integrity Number; FSC:forward-scattered light; SSC:side-scattered light;-H(height); -W(width); PE: phycoerythrin, used to detect autofluorescence; YFP:yellow fluorescent protein, reporter gene; Comp: compensated data; N/D: not determined; FU: fluorescence absorption units; s:seconds.
