# Supplementary material for: Transcription and Signaling Regulators in Developing Neuronal Subtypes of Mouse and Human Enteric Nervous System
Source: PubMed Central journal article supplement (PMC6381388; doi:10.1053/j.gastro.2017.10.005), 2018-02
Supplement: mmc4.pdf [file mmc4.pdf]

## SUPPLEMENTARY FIGURE 2

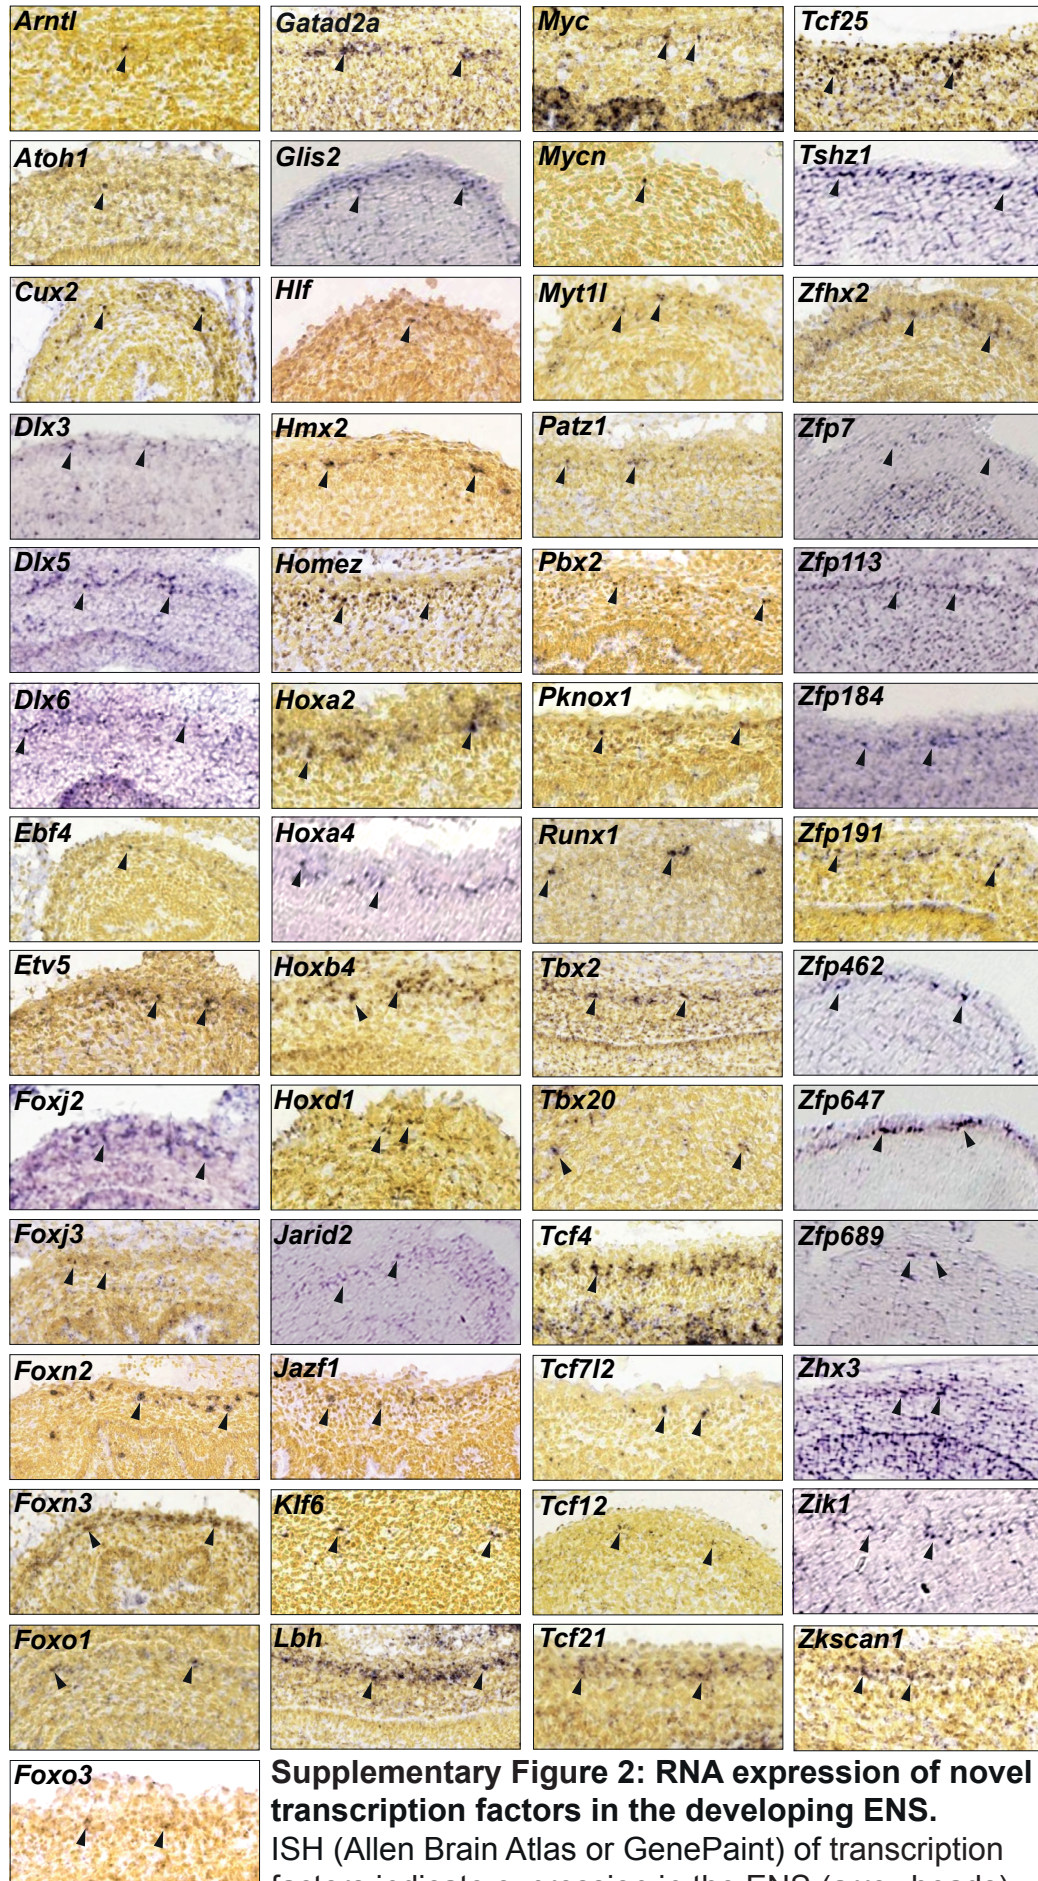

**Supplementary Figure 2: RNA expression of novel transcription factors in the developing ENS.** ISH (Allen Brain Atlas or GenePaint) of transcription factors indicate expression in the ENS (arrowheads). Pictures show gut at E13-15, except *Klf6* and *Tbx20*, which are depicted at E11.5.
