# Supplementary material for: Transcription and Signaling Regulators in Developing Neuronal Subtypes of Mouse and Human Enteric Nervous System
Source: PubMed Central journal article supplement (PMC6381388; doi:10.1053/j.gastro.2017.10.005), 2018-02
Supplement: mmc5.pdf [file mmc5.pdf]

# SUPPLEMENTARY FIGURE 3

HUC/D SOX2/10

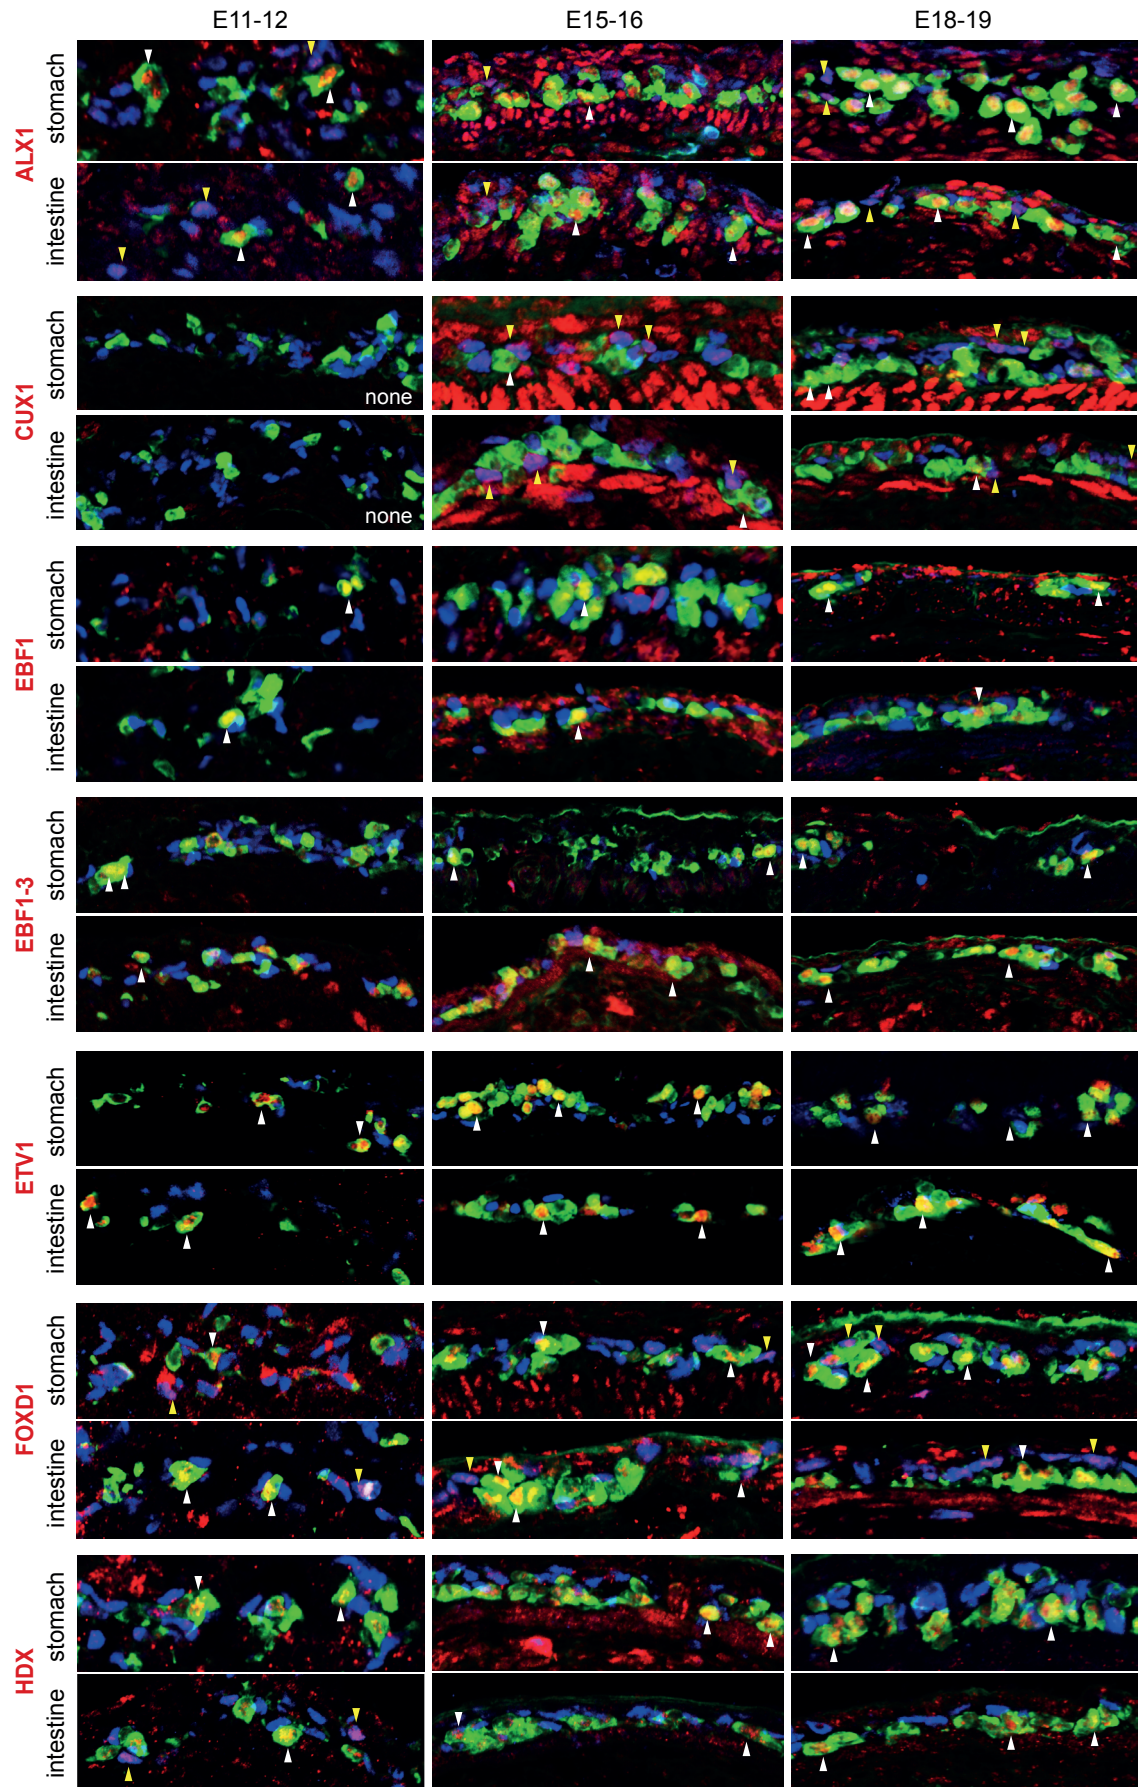

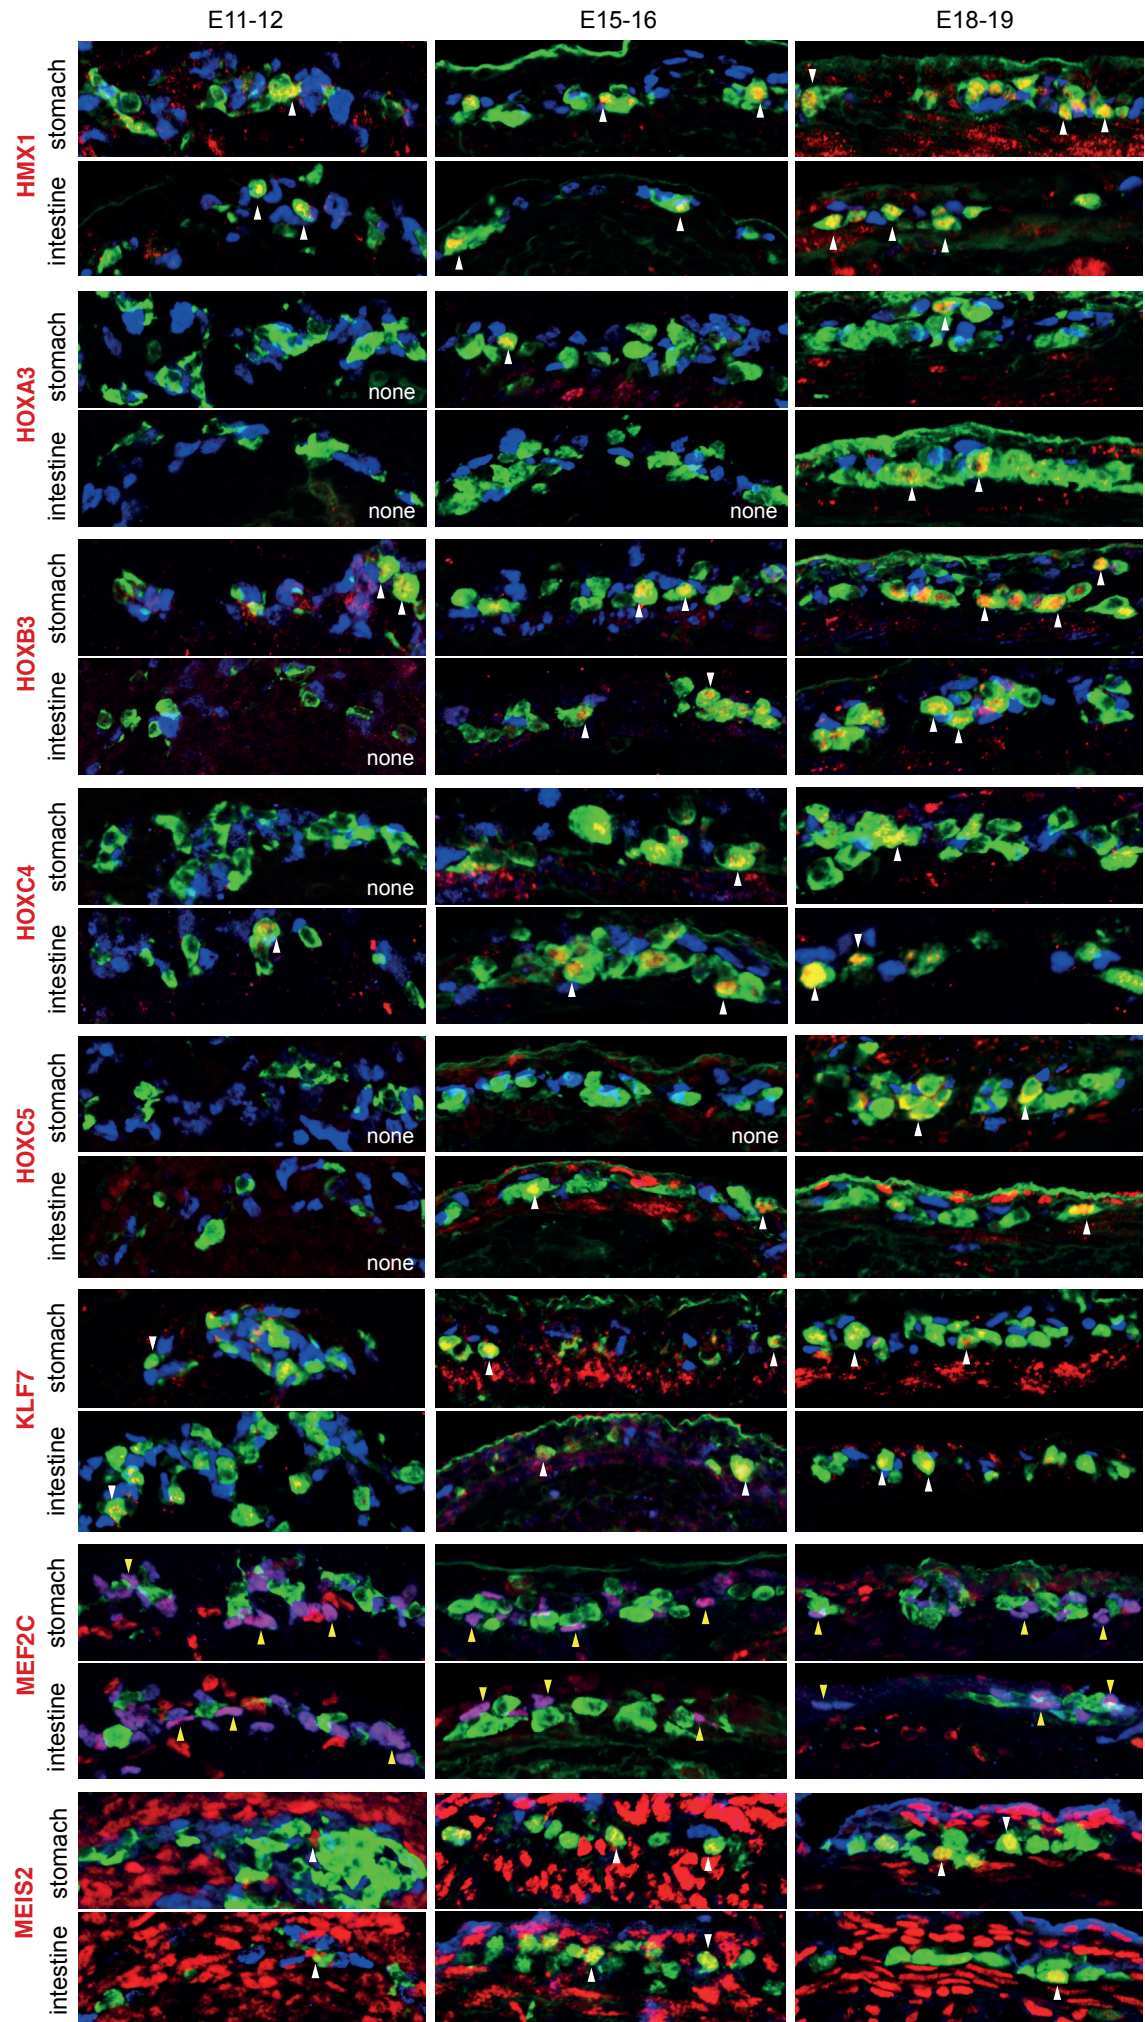

HUC/D SOX2/10

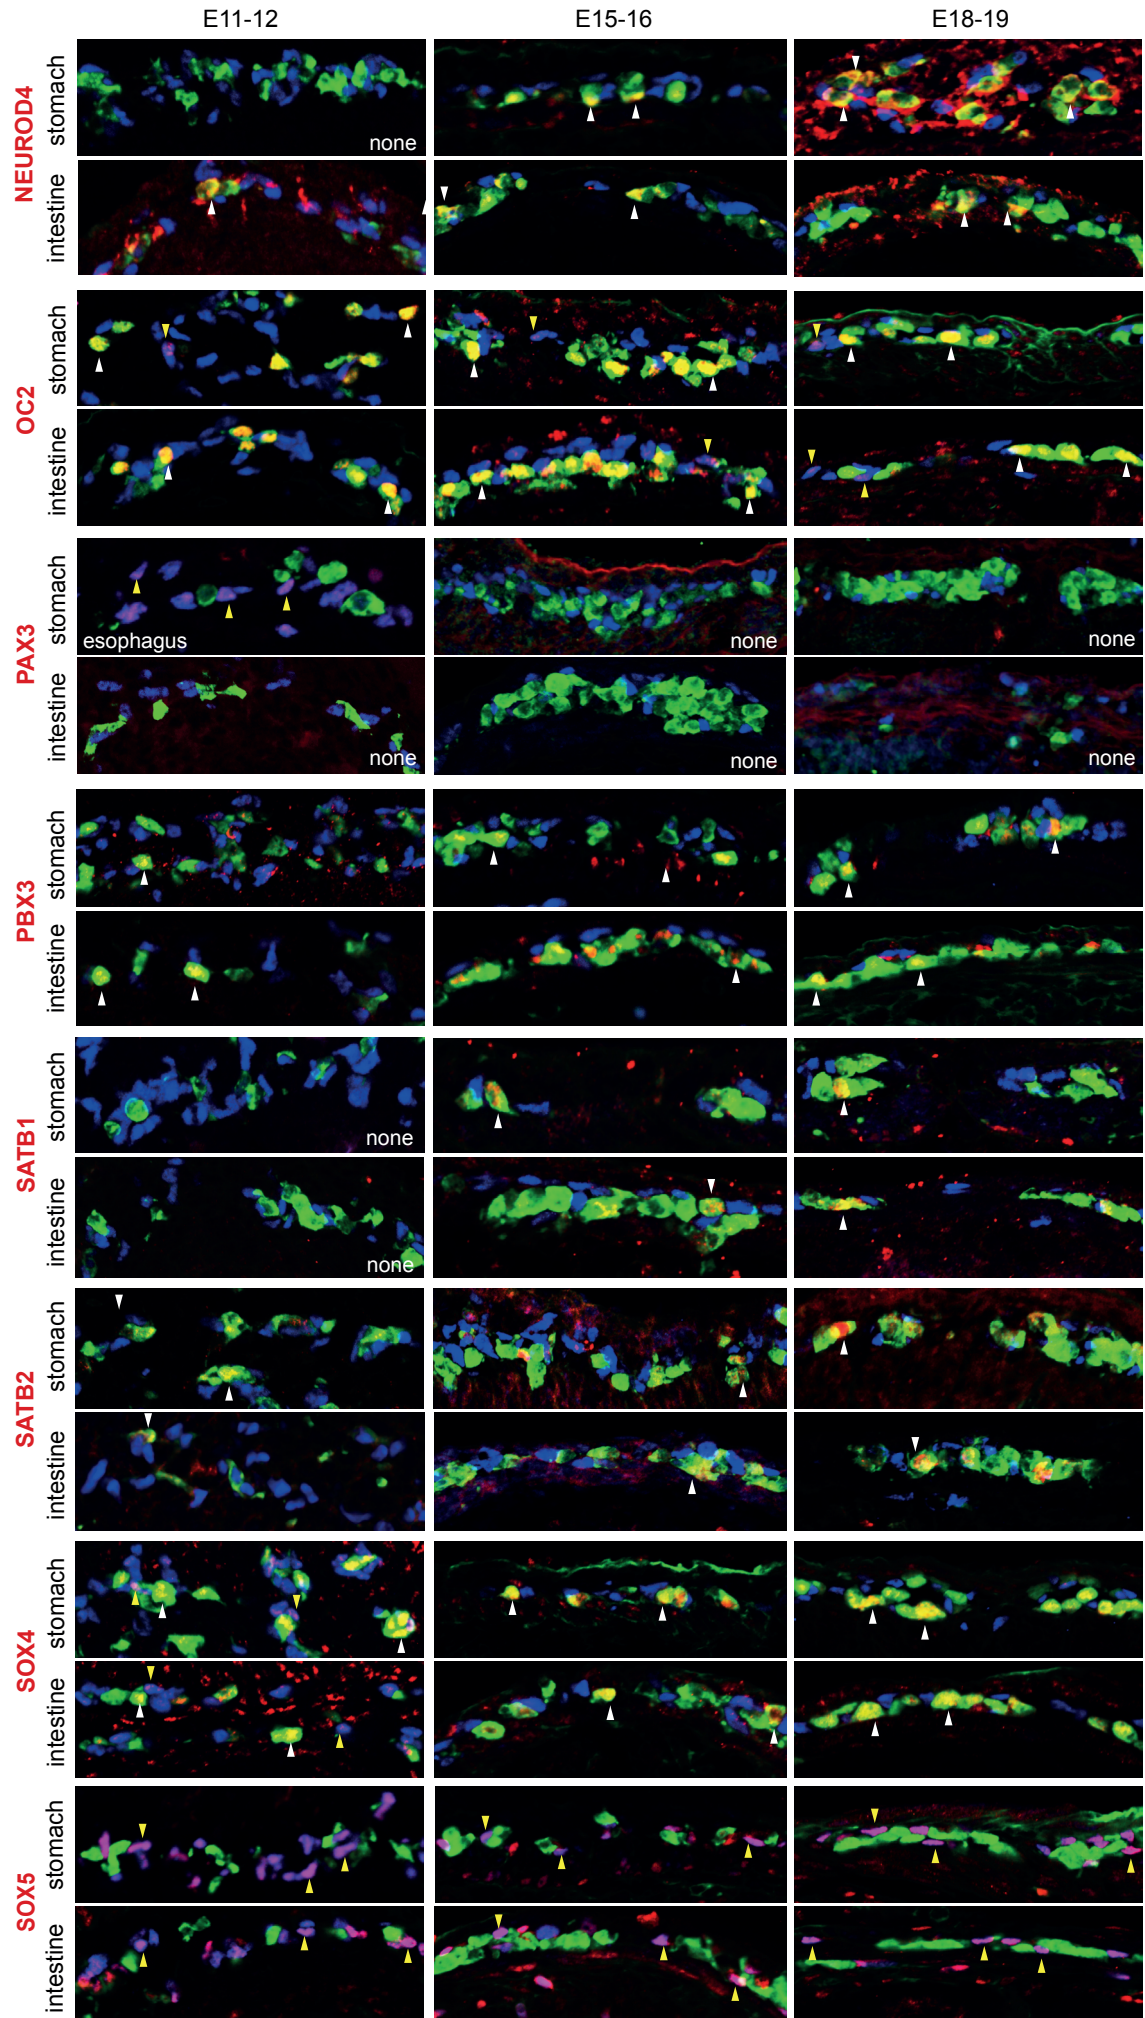

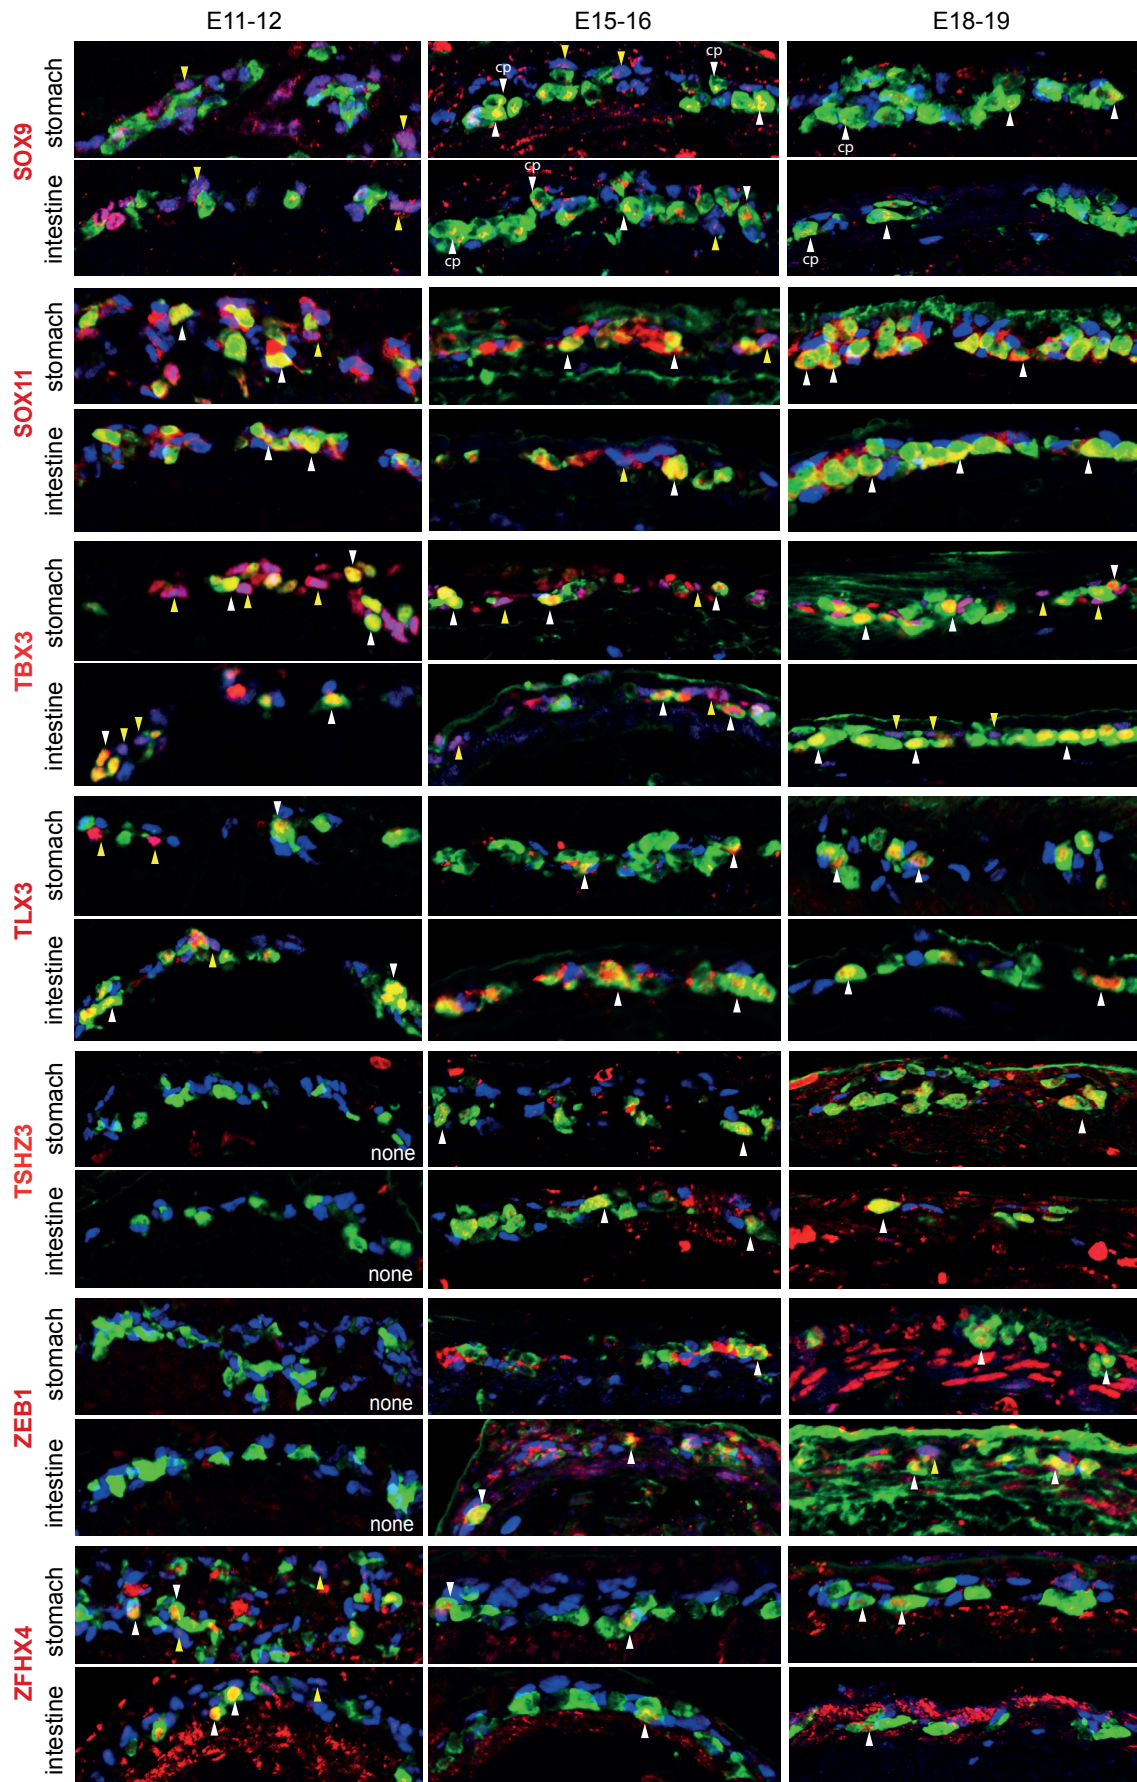

**Supplementary Figure 3: IHC analysis of transcription factors in the developing mouse ENS.** Co-expression analysis of transcription factors with the neuronal marker HUC/D (white arrowheads) and the progenitor marker SOX2/10 (yellow arrowheads) at E11-12, E15-16 and E18-19 in stomach and intestine of mouse embryos. “cp” above arrowhead indicates cytoplasmic expression (SOX9).
