# Supplementary material for: Transcription and Signaling Regulators in Developing Neuronal Subtypes of Mouse and Human Enteric Nervous System
Source: PubMed Central journal article supplement (PMC6381388; doi:10.1053/j.gastro.2017.10.005), 2018-02
Supplement: mmc6.pdf [file mmc6.pdf]

# SUPPLEMENTARY FIGURE 4

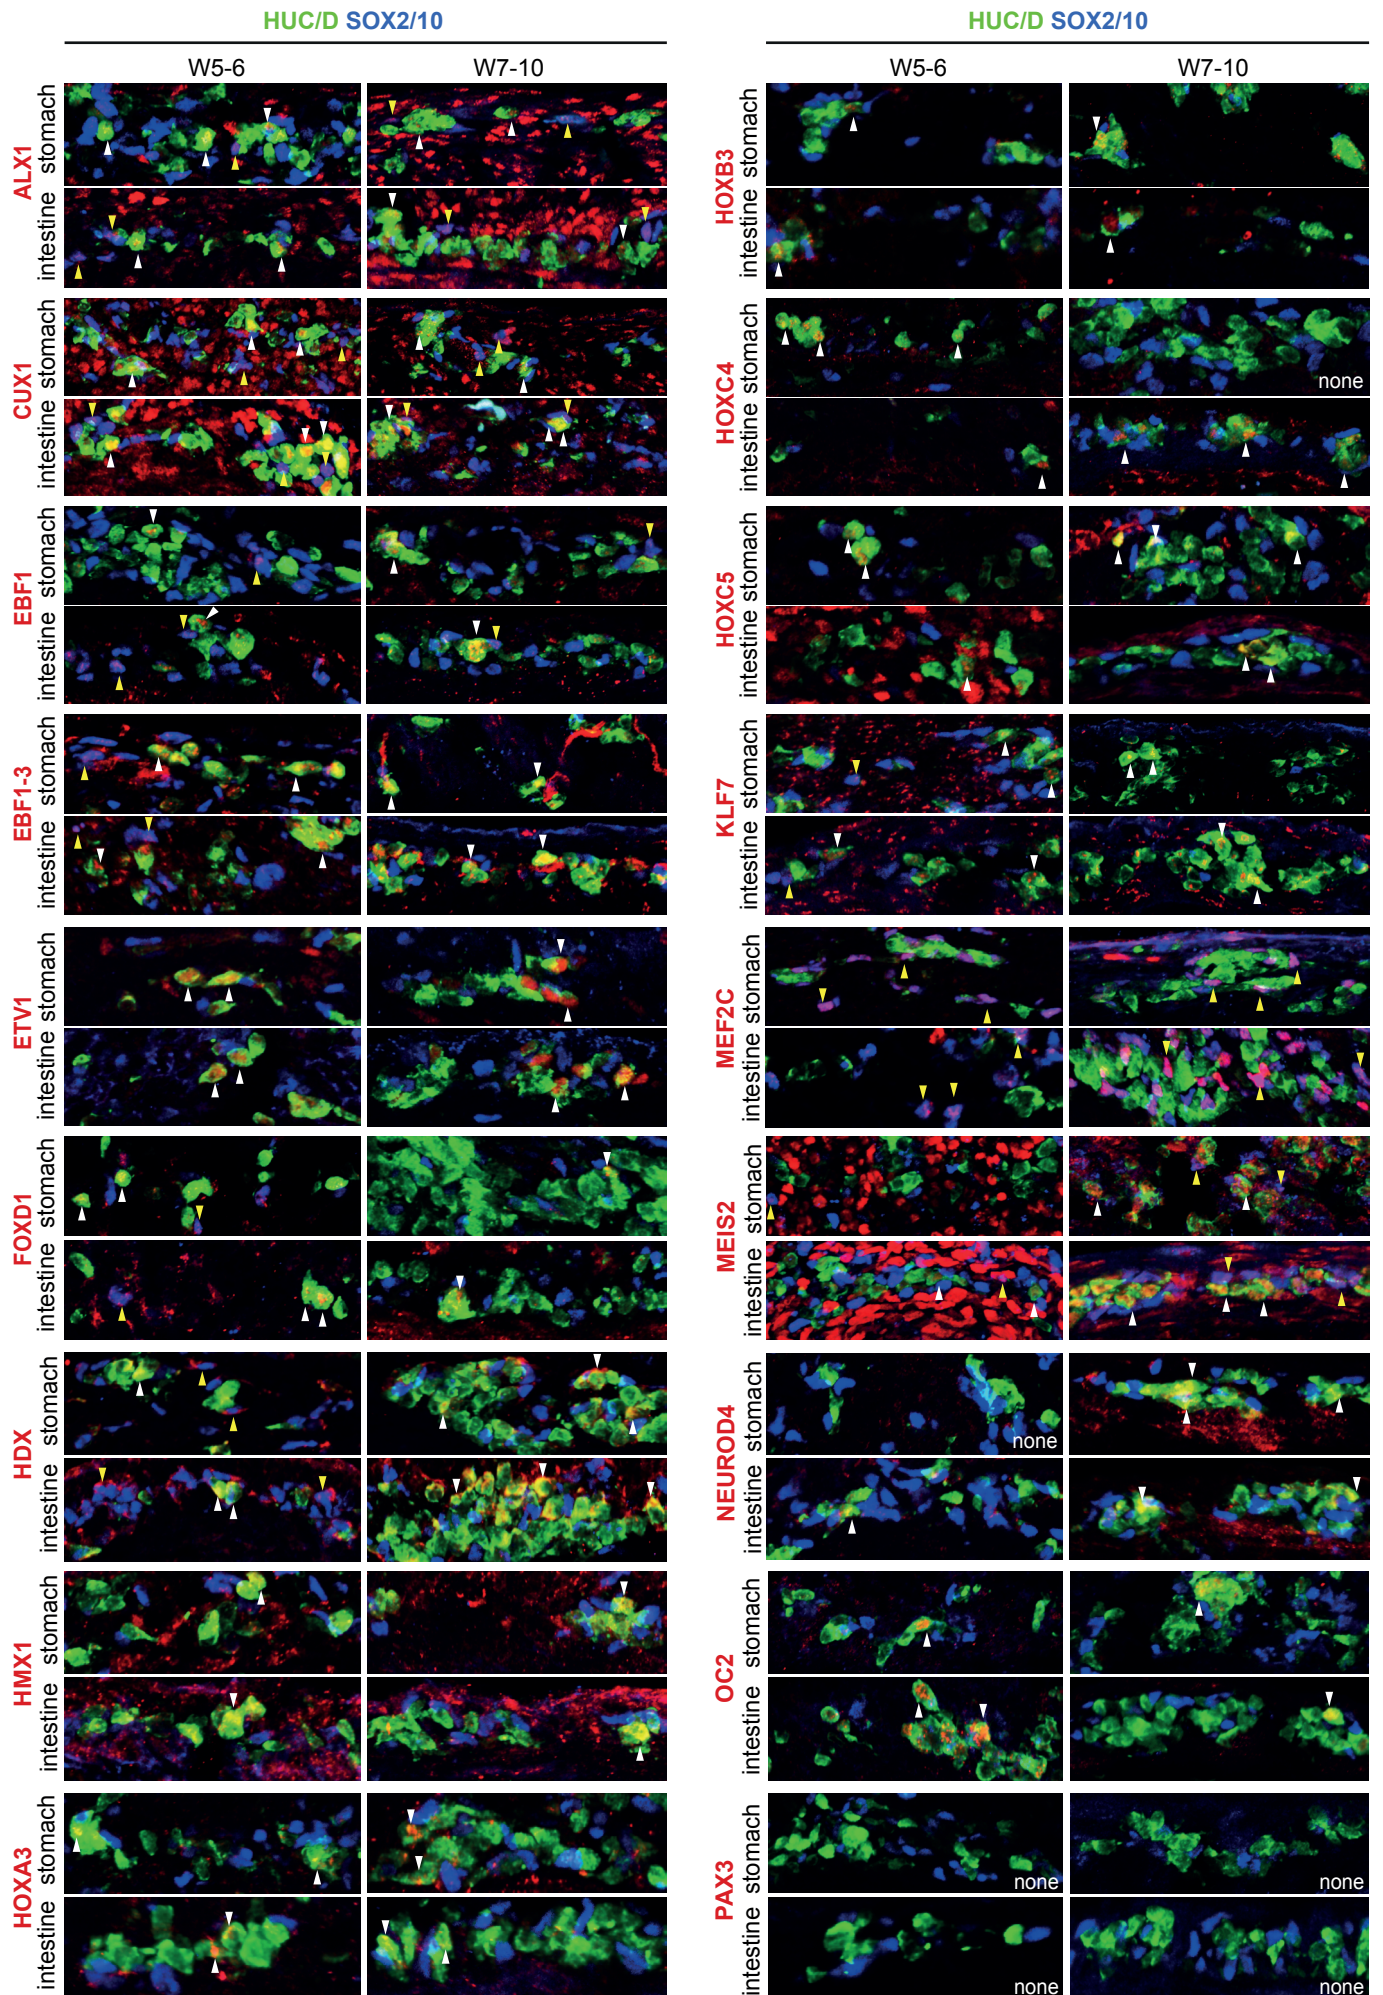

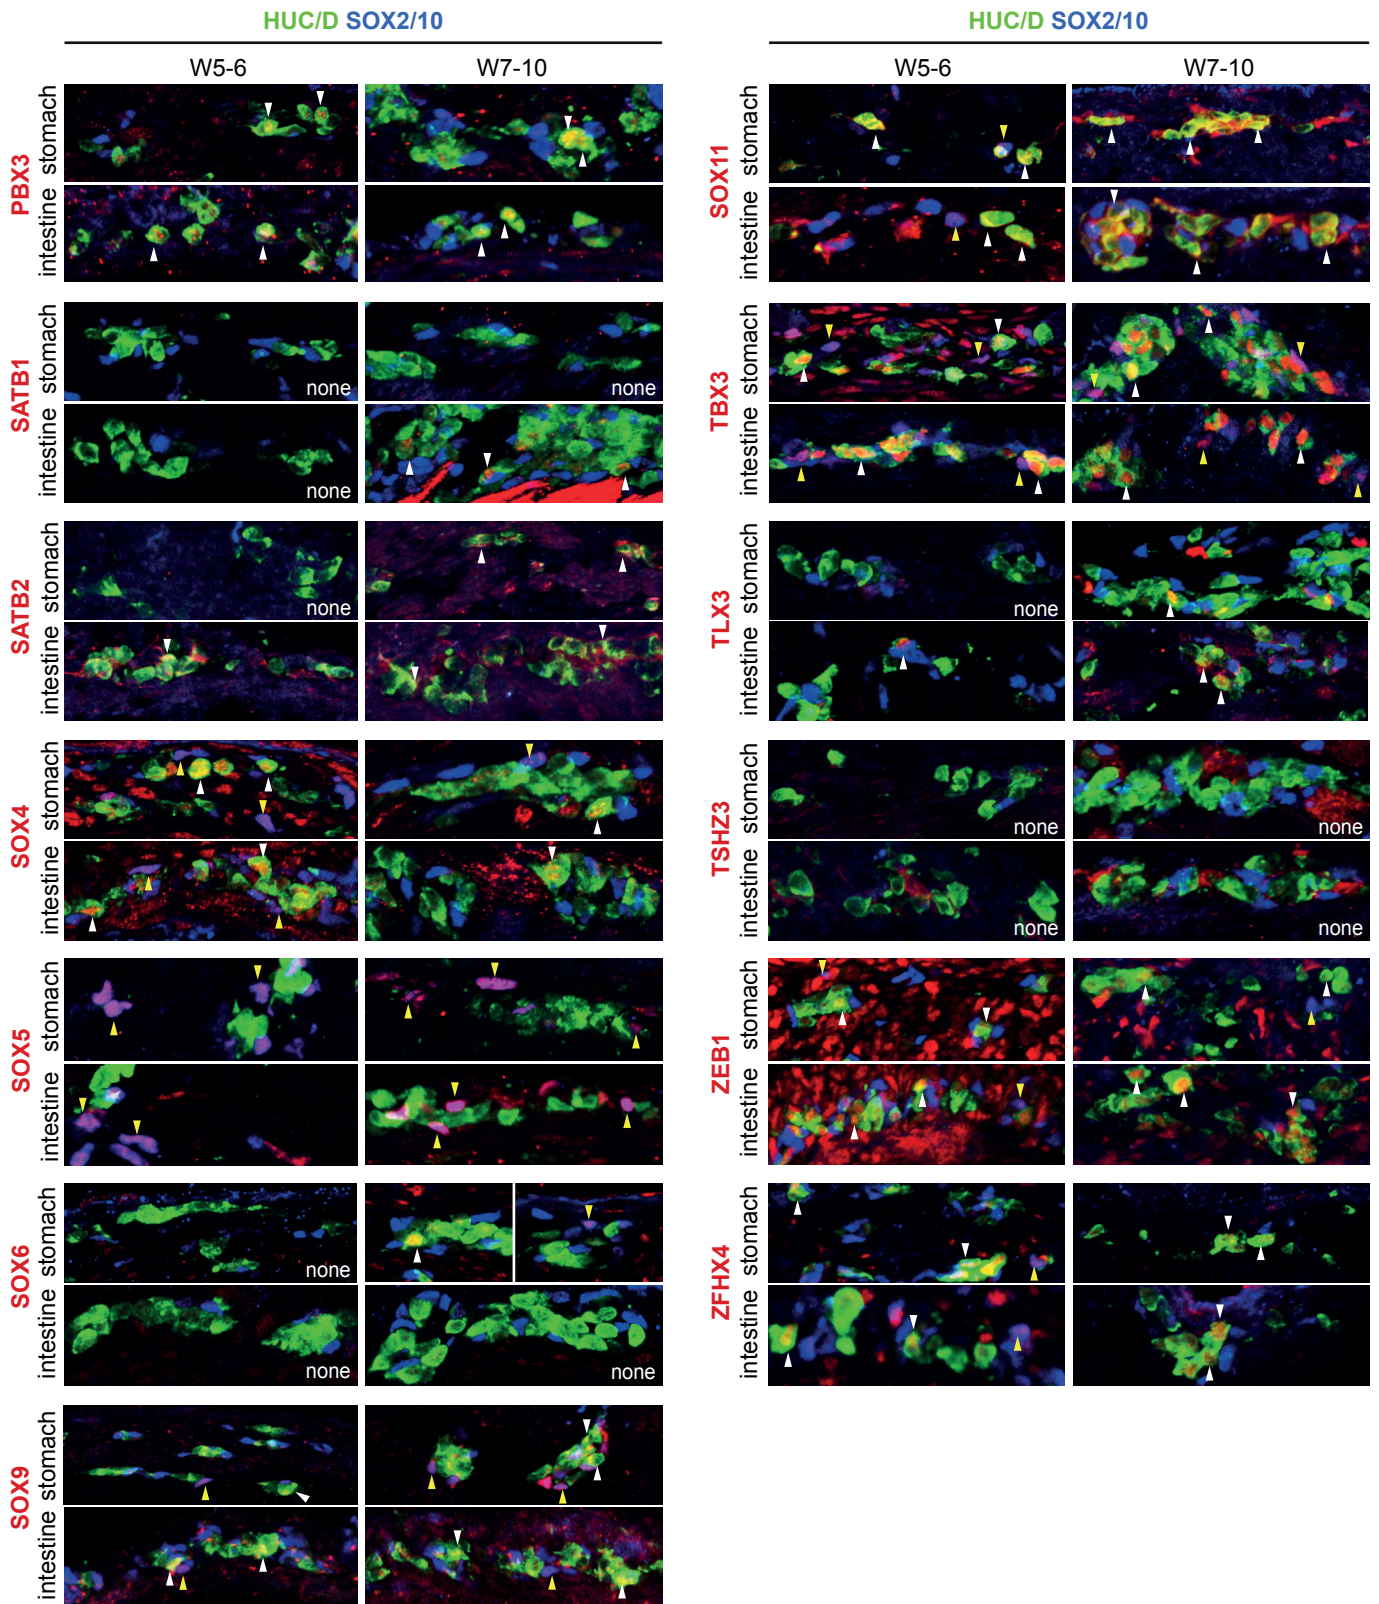

**Supplementary Figure 4: IHC analysis of transcription factors in the developing human ENS.** Co-expression analysis of transcription factors with the neuronal marker HUC/D (white arrowheads) and the progenitor marker SOX2/10 (yellow arrowheads) at W5-6 and W7-10 in stomach and intestine of human embryos.
