# Supplementary material for: Transcription and Signaling Regulators in Developing Neuronal Subtypes of Mouse and Human Enteric Nervous System
Source: PubMed Central journal article supplement (PMC6381388; doi:10.1053/j.gastro.2017.10.005), 2018-02
Supplement: mmc7.pdf [file mmc7.pdf]

## SUPPLEMENTARY FIGURE 5

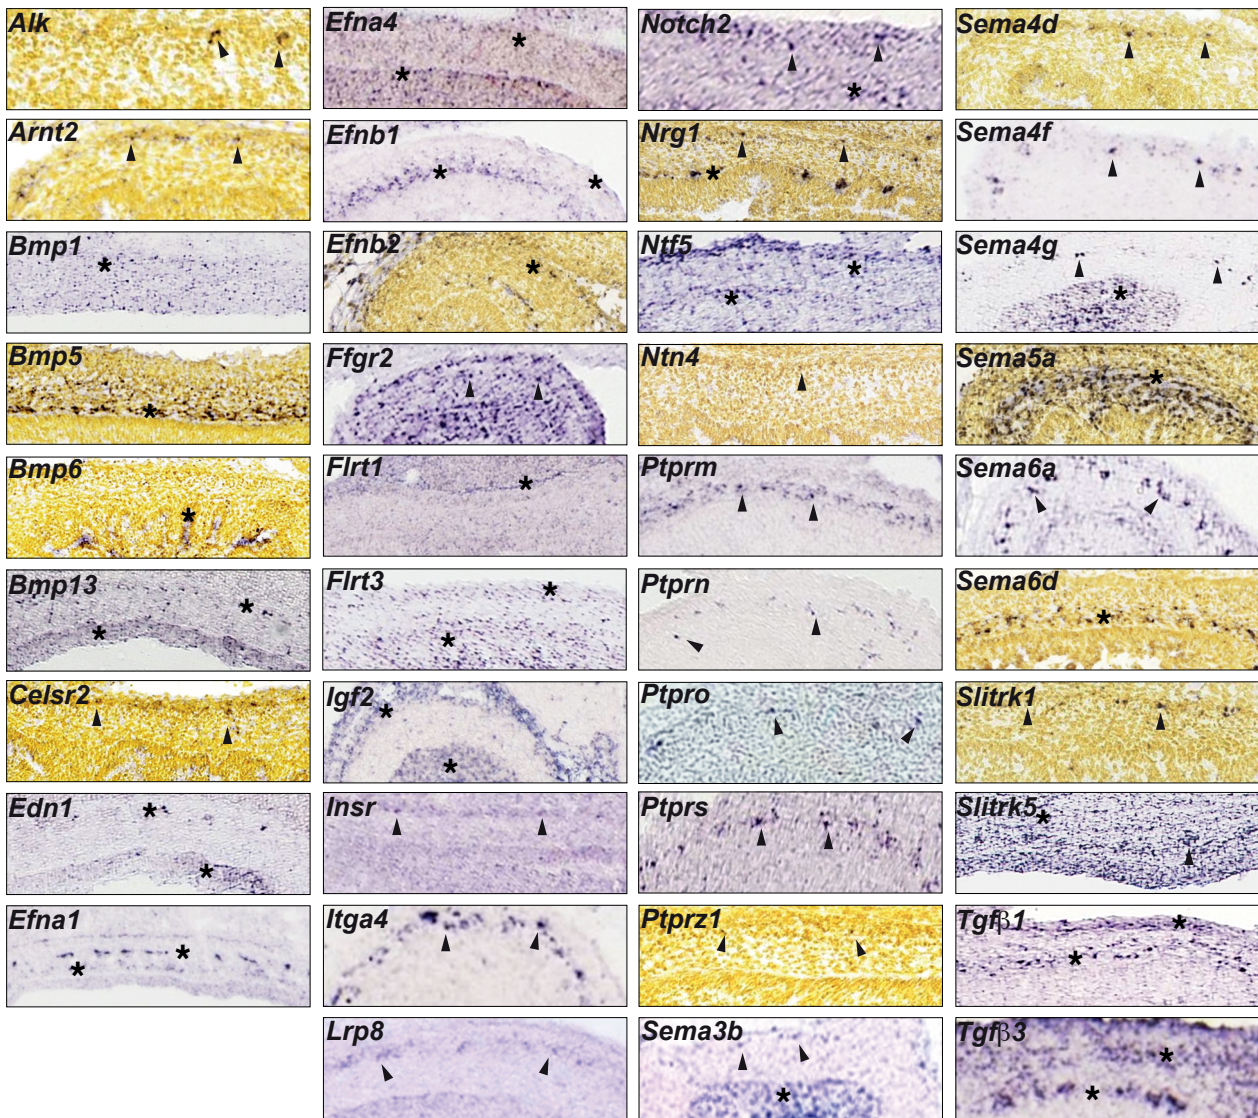

**Supplementary Figure 5: RNA expression of novel signaling ligands and receptors in the developing bowel wall.** ISH (Allen Brain Atlas or GenePaint) of signaling factors and their receptors at E14-15. Arrowheads indicate expression in the ENS, stars indicate expression in non-ENS bowel tissue. This summary also includes signaling components not highlighted in figure 5, but listed in supplementary table 7.
