# Supplementary material for: Transcription and Signaling Regulators in Developing Neuronal Subtypes of Mouse and Human Enteric Nervous System
Source: PubMed Central journal article supplement (PMC6381388; doi:10.1053/j.gastro.2017.10.005), 2018-02
Supplement: mmc10.pdf [file mmc10.pdf]

## SUPPLEMENTARY FIGURE 8

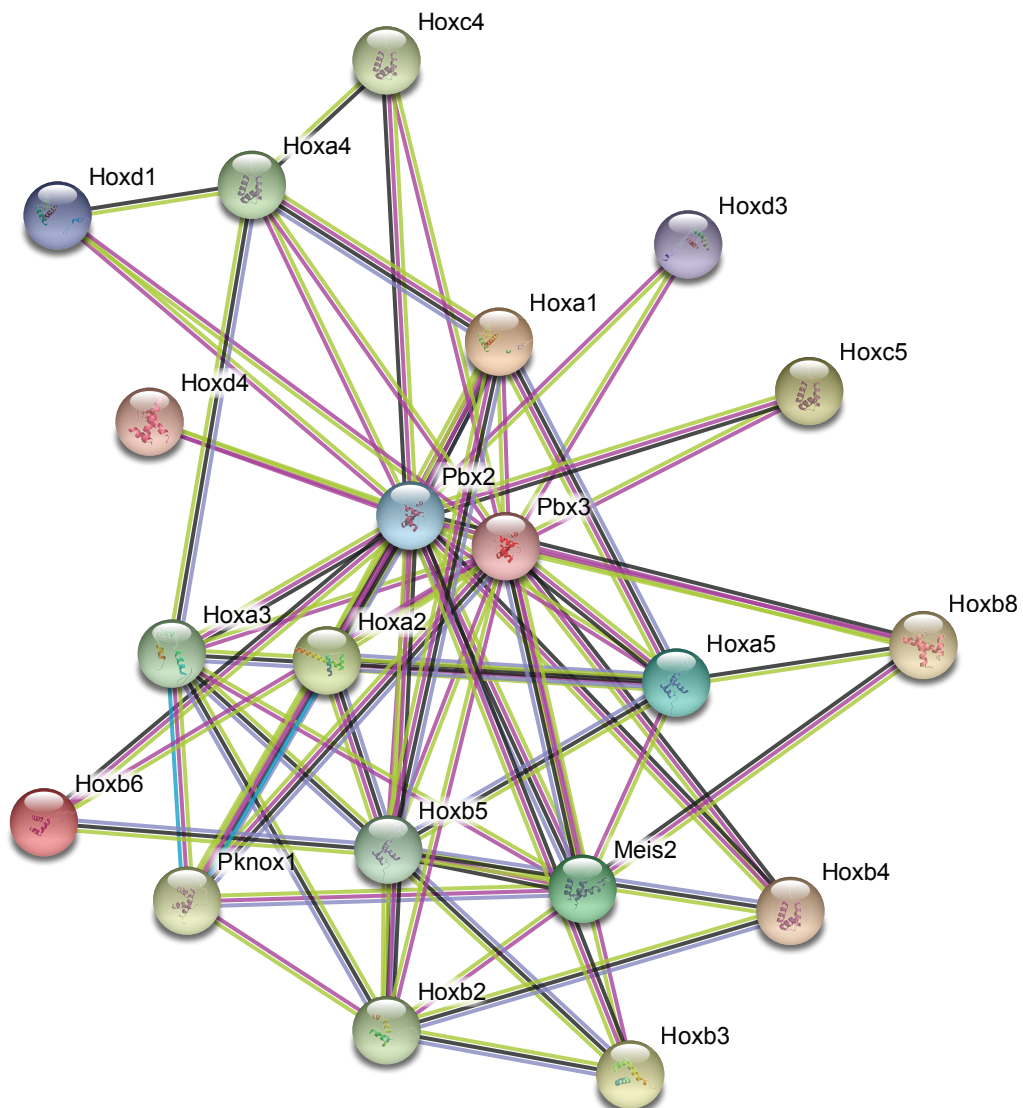

**Supplementary Figure 8. String interaction scheme of HOX and TALE-proteins.** Identified HOX and TALE proteins (20 genes) analysed for validated interactions using “Search tool for the retrieval of interacting genes/proteins” (STRING; string-db.org). Interaction code: blue:from curated databases; pink: experimentally determined; black: co-expressed; light green: textmining; light blue: homology.
