# Supplementary material for: Transcription and Signaling Regulators in Developing Neuronal Subtypes of Mouse and Human Enteric Nervous System
Source: PubMed Central journal article supplement (PMC6381388; doi:10.1053/j.gastro.2017.10.005), 2018-02
Supplement: mmc11.pdf [file mmc11.pdf]

**Supplementary Table 1: Antibodies**

| Antigen    | Host       | Dilution  | Source                                   |
|------------|------------|-----------|------------------------------------------|
| 5-HT       | Rabbit     | 1:2000    | Sigma S5545                              |
| ActivinR1A | Rabbit     | 1:500     | Abcam ab60157                            |
| ActivinR2A | Rabbit     | 1:1000    | Abcam ab96793                            |
| AHR        | Rabbit     | 1:300     | Abcam ab84833                            |
| ALX1       | Rabbit     | 1:100; AR | Sigma HPA018905                          |
| Calbindin  | Rabbit     | 1:1000    | Chemicon AB1778                          |
| Calbindin  | Goat       | 1:500     | R&D AF3320                               |
| CGRP       | Rabbit     | 1:5000    | Sigma C8198                              |
| CGRP       | Goat       | 1:1500    | AdBsero 1720-9007                        |
| ChAT       | Goat       | 1:300; AR | Millipore AB144P                         |
| CTGF       | Rabbit     | 1:400     | Abcam ab6992                             |
| CUX1       | Rabbit     | 1:200; AR | Santa Cruz sc-13024                      |
| CXCR4      | Rabbit     | 1:500     | Abcam ab124824                           |
| CXCL12     | Mouse      | 1:100     | R&D 79018                                |
| EBF1       | Rabbit     | 1:2000    | Nordic Bio LSB6814                       |
| EBF1-3     | Rabbit     | 1:500     | Santa Cruz (H-300) sc-33552              |
| ETV1       | Rabbit     | 1:250     | Kind gift from S. Arber <sup>1</sup>     |
| FGF1       | Rabbit     | 1:2000    | Abcam ab9588                             |
| FGFR1      | Rabbit     | 1:1000    | Abcam ab10646                            |
| FOXD1      | Goat       | 1:100     | Nordic Bio LSB6453                       |
| GDF10      | Rabbit     | 1:50      | Atlas ab HPA015498                       |
| HDX        | Rabbit     | 1:150; AR | Atlas ab HPA047189                       |
| HMX1       | Rabbit     | 1:2000    | Kind gift from E. Turner <sup>2</sup>    |
| HOXA3      | Rabbit     | 1:500     | Kind gift from T.M. Jessell <sup>3</sup> |
| HOXB3      | Rabbit     | 1:500     | Santa Cruz (H50) sc-28606                |
| HOXC4      | Rabbit     | 1:500     | Kind gift from T.M. Jessell <sup>3</sup> |
| HOXC5      | Rabbit     | 1:1000    | Kind gift from T.M. Jessell <sup>4</sup> |
| HuC/D      | Mouse      | 1:300     | Mol Probes A21271                        |
| IGF1       | Goat       | 1:1000    | Sigma SAB2501424                         |
| IGF1R      | Rabbit     | 1:200     | Abcam 131476; human                      |
| INHA       | Mouse      | 1:1000    | Thermo Fisher MA5-15703                  |
| INHBA      | Rabbit     | 1:500     | Atlas ab HPA020031                       |
| ISL1/2     | Guinea Pig | 1:10000   | Kind gift from T.M. Jessell <sup>5</sup> |
| KLF7       | Rabbit     | 1:250; AR | Novus Bio NBP1-80638                     |
| LRP11      | Rabbit     | 1:1000    | Abcam ab155310                           |
| MEF2C      | Rabbit     | 1:400     | Cell Signaling 5030XP                    |
| MEIS2      | Rabbit     | 1:500; AR | Atlas ab HPA003256                       |
| Midkine    | Rabbit     | 1:200     | Abcam ab36038                            |
| NEUROD4    | Rabbit     | 1:300; AR | Atlas ab HPA026998                       |
| NKX6.1     | Mouse      | 1:4       | DSHB by O.D Madsen                       |
| nNOS       | Rabbit     | 1:500     | Santa Cruz sc-648                        |
| nNOS       | Goat       | 1:1000    | Abcam ab1376                             |
| NPY        | Rabbit     | 1:3000    | DiaSorin                                 |
| NPY        | Sheep      | 1:2000    | Abcam ab6173                             |

|                  |            |            |                                            |
|------------------|------------|------------|--------------------------------------------|
| <b>OC2</b>       | Rabbit     | 1:250      | Atlas ab HPA057058                         |
| <b>PAX3</b>      | Mouse      | 1:100      | DSHB by C.P. Ordahl                        |
| <b>PBX3</b>      | Rabbit     | 1:500      | Santa Cruz sc-891                          |
| <b>Plexin B1</b> | Rabbit     | 1:200      | Abcam ab90087                              |
| <b>SATB1</b>     | Goat       | 1:500, AR  | Santa Cruz (E15) sc-5990                   |
| <b>SATB2</b>     | Mouse      | 1:500      | Santa Cruz sc-81376                        |
| <b>SLITRK2</b>   | Rabbit     | 1:100      | Abcam ab67305, human                       |
| <b>SLITRK3</b>   | Rabbit     | 1:5000     | Abcam ab67306                              |
| <b>SOX2</b>      | Rabbit     | 1:5000     | Seven Hills WRAB-1236                      |
| <b>SOX4</b>      | Rabbit     | 1:150      | Atlas ab HPA029901                         |
| <b>SOX5</b>      | Rabbit     | 1:1000     | Kind gift from J. Muhr                     |
| <b>SOX6</b>      | Guinea Pig | 1:1000     | Kind gift from M. Wegner <sup>6</sup>      |
| <b>SOX6</b>      | Rabbit     | 1:300      | Atlas ab HPA001923; human                  |
| <b>SOX9</b>      | Goat       | 1:500, AR  | R&D AF3075                                 |
| <b>SOX10</b>     | Goat       | 1:200      | Santa Cruz (N20) sc-17342                  |
| <b>SOX10</b>     | Guinea Pig | 1:500      | Kind gift from M. Wegner <sup>7</sup>      |
| <b>SOX11</b>     | Rabbit     | 1:1500     | Abcam ab134107                             |
| <b>TBX3</b>      | Goat       | 1:300      | R&D AF4509                                 |
| <b>TGFβ2</b>     | Rabbit     | 1:500      | Santa Cruz sc-90                           |
| <b>TGFβR1</b>    | Rabbit     | 1:500      | Santa Cruz sc398 (v22)                     |
| <b>TGFβR2</b>    | Rabbit     | 1:500      | Abcam ab186838                             |
| <b>TLX3</b>      | Guinea pig | 1:5000; AR | Kind gift from T. Müller and C. Birchmeier |
| <b>TLX3</b>      | Rabbit     | 1:5000; AR | Kind gift from T. Müller and C. Birchmeier |
| <b>TH</b>        | Rabbit     | 1:500      | Pelfreeze P40101-0                         |
| <b>TH</b>        | Sheep      | 1:300      | Novus Bio NB300-110                        |
| <b>TH</b>        | Chicken    | 1:500      | Abcam ab76442                              |
| <b>TSHZ3</b>     | Rabbit     | 1:200; AR  | Sigma HPA008834                            |
| <b>VIP</b>       | Rabbit     | 1:2500     | Abcam ab43841                              |
| <b>ZEB1</b>      | Rabbit     | 1:400; AR  | Santa Cruz sc-25388                        |
| <b>ZFHX4</b>     | Rabbit     | 1:100; AR  | Sigma HPA023837                            |

| <b>Secondary Antibodies</b> | <b>Recognition of</b>                            | <b>Dilution</b> | <b>Source</b>    |
|-----------------------------|--------------------------------------------------|-----------------|------------------|
| <b>Alexa 555</b>            | Rabbit, Mouse, Guinea pig, Goat                  | 1:1000          | Molecular Probes |
| <b>Alexa 555</b>            | Mouse IgG1& IgG2a                                | 1:1000          | Molecular Probes |
| <b>Alexa 488</b>            | Mouse IgG1 & IgG2b, Goat, Rabbit, Chicken, Sheep | 1:400           | Molecular Probes |
| <b>Alexa 647</b>            | Goat, Rabbit, Mouse                              | 1:200           | Molecular Probes |

|            |                  |        |                        |
|------------|------------------|--------|------------------------|
| <b>Cy5</b> | Goat, Guinea pig | 1:200  | Jackson ImmunoResearch |
| <b>Cy3</b> | Guinea pig       | 1:1000 | Jackson ImmunoResearch |

AR: antigen retrieval

### REFERENCES:

1. Arber S, Ladle DR, Lin JH, et al. ETS gene Er81 controls the formation of functional connections between group Ia sensory afferents and motor neurons. *Cell* 2000;101:485-98.
2. Quina LA, Tempest L, Hsu YW, et al. Hmx1 is required for the normal development of somatosensory neurons in the geniculate ganglion. *Dev Biol* 2012;365:152-63.
3. Dasen JS, Tice BC, Brenner-Morton S, et al. A Hox regulatory network establishes motor neuron pool identity and target-muscle connectivity. *Cell* 2005;123:477-91.
4. Liu JP, Laufer E, Jessell TM. Assigning the positional identity of spinal motor neurons: rostrocaudal patterning of Hox-c expression by FGFs, Gdf11, and retinoids. *Neuron* 2001;32:997-1012.
5. Tanabe Y, William C, Jessell TM. Specification of motor neuron identity by the MNR2 homeodomain protein. *Cell* 1998;95:67-80.
6. Stolt CC, Schlierf A, Lommes P, et al. SoxD proteins influence multiple stages of oligodendrocyte development and modulate SoxE protein function. *Dev Cell* 2006;11:697-709.
7. Maka M, Stolt CC, Wegner M. Identification of Sox8 as a modifier gene in a mouse model of Hirschsprung disease reveals underlying molecular defect. *Dev Biol* 2005;277:155-69.
