# Supplementary material for: Transcription and Signaling Regulators in Developing Neuronal Subtypes of Mouse and Human Enteric Nervous System
Source: PubMed Central journal article supplement (PMC6381388; doi:10.1053/j.gastro.2017.10.005), 2018-02
Supplement: mmc13.pdf [file mmc13.pdf]

**Supplementary Table 3: Transcription Factors enriched (>1.2) in pairwise comparisons between cell populations in the developing gut**

Transcription factors were identified using GO terms *transcription factor activity* (GO:0000989), and *regulation of transcription, DNA dependent* (GO:0006355).

The combined lists of genes were manually screened to remove wrongly annotated genes.

| <b>Sox11vsWnt11</b> |                            | <b>Sox11vsSox15</b> |                                   |
|---------------------|----------------------------|---------------------|-----------------------------------|
| <b>S11vsW11</b>     | <b>Fold Change &gt;1.2</b> | <b>S11vsS15</b>     | <b>Fold Change &gt;1.2</b>        |
| Hdx                 | highly divergent homeobox  | Adnp2               | ADNP homeobox 2                   |
|                     |                            | Alx1                | ALX homeobox 1                    |
|                     |                            | Arid3a              | AT rich interactive domain 3A (B  |
|                     |                            | Csda                | cold shock domain protein A       |
|                     |                            | Dbp                 | D site albumin promoter binding   |
|                     |                            | E2f3                | E2F transcription factor 3        |
|                     |                            | E2f5                | E2F transcription factor 5        |
|                     |                            | E2f6                | E2F transcription factor 6        |
|                     |                            | Elk3                | ELK3, member of ETS oncogene      |
|                     |                            | Ets1                | E26 avian leukemia oncogene 1,    |
|                     |                            | Etv2                | similar to ETS related protein 71 |
|                     |                            | Etv6                | ets variant gene 6 (TEL oncogene  |
|                     |                            | Fli1                | Friend leukemia integration 1     |
|                     |                            | Foxf1a              | forkhead box F1a                  |
|                     |                            | Foxp2               | forkhead box P2                   |
|                     |                            | Gata3               | GATA binding protein 3            |
|                     |                            | Gatad1              | GATA zinc finger domain contain   |
|                     |                            | Gatad2a             | similar to Transcription repres   |
|                     |                            | Gli1                | GLI-Kruppel family member GLI1    |
|                     |                            | Gzf1                | GDNF-inducible zinc finger prote  |
|                     |                            | Hand1               | heart and neural crest derivative |
|                     |                            | Hdac1               | similar to histone deacetylase H1 |
|                     |                            | Hmga1               | high mobility group AT-hook I, re |
|                     |                            | Hoxa1               | homeo box A1                      |
|                     |                            | Hoxc9               | homeo box C9                      |
|                     |                            | Hoxd10              | homeo box D10                     |
|                     |                            | Hoxd9               | homeo box D9                      |
|                     |                            | Isl1                | ISL1 transcription factor, LIM/hc |
|                     |                            | Jarid2              | jumonji, AT rich interactive dom  |
|                     |                            | Lbh                 | limb-bud and heart                |
|                     |                            | Lef1                | lymphoid enhancer binding facto   |
|                     |                            | Meis2               | Meis homeobox 2                   |
|                     |                            | Mrpl28              | mitochondrial ribosomal protein   |
|                     |                            | Myc                 | myelocytomatosis oncogene         |
|                     |                            | Mycn                | v-myc myelocytomatosis viral re   |

|                       |                            |                       |                                   |
|-----------------------|----------------------------|-----------------------|-----------------------------------|
|                       |                            | NeuroD4               | neurogenic differentiation 4      |
|                       |                            | Nfe2l2                | nuclear factor, erythroid derived |
|                       |                            | Nkx6-1                | NK6 homeobox 1                    |
|                       |                            | Nr1h5                 | nuclear receptor subfamily 1, gr  |
|                       |                            | Nr2f1                 | nuclear receptor subfamily 2, gr  |
|                       |                            | Nr2f2                 | similar to COUP-TFI; nuclear rece |
|                       |                            | Pax3                  | paired box gene 3                 |
|                       |                            | Pbx2                  | pre B-cell leukemia transcrip     |
|                       |                            | Pitx2                 | paired-like homeodomain transc    |
|                       |                            | Plagl2                | pleiomorphic adenoma gene-like    |
|                       |                            | Pou4f2                | POU domain, class 4, transcrip    |
|                       |                            | Prrx1                 | paired related homeobox 1         |
|                       |                            | Rest                  | RE1-silencing transcription facto |
|                       |                            | Rex2                  | hypothetical protein LOC100048    |
|                       |                            | Rsl1                  | regulator of sex limited protein  |
|                       |                            | Sall4                 | sal-like 4 (Drosophila)           |
|                       |                            | Six1                  | sine oculis-related homeobox 1    |
|                       |                            | Six2                  | similar to Homeobox protein SIX   |
|                       |                            | Sox9                  | SRY-box containing gene 9         |
|                       |                            | Tbx20                 | T-box 20                          |
|                       |                            | Tcf21                 | transcription factor 21           |
|                       |                            | Tcfap2a               | transcription factor AP-2, alpha  |
|                       |                            | Tcfap2b               | transcription factor AP-2 beta    |
|                       |                            | Tfam                  | transcription factor A, mitochon  |
|                       |                            | Tfdp1                 | predicted gene 7390; transcrip    |
|                       |                            | Tgif1                 | TGFB-induced factor homeobox      |
|                       |                            | Trp53                 | transformation related protein 5  |
|                       |                            | Zbtb16                | zinc finger and BTB domain cont   |
|                       |                            | Zfp101                | zinc finger protein 101           |
|                       |                            | Zfp334                | zinc finger protein 334           |
|                       |                            | Zfp454                | zinc finger protein 454           |
|                       |                            | Zfp54                 | hypothetical protein LOC100044    |
|                       |                            | Zfp568                | zinc finger protein 568           |
|                       |                            | Zfp58                 | zinc finger protein 58            |
|                       |                            | Zfp607                | zinc finger proten 607            |
|                       |                            | Zfp617                | zinc finger protein 617           |
|                       |                            | Zfp708                | zinc finger protein 708           |
|                       |                            | Zfp820                | hypothetical protein LOC100044    |
|                       |                            | Zfp936                | RIKEN cDNA I1C0022H11 gene; s     |
|                       |                            | Zik1                  | zinc finger protein interacting w |
|                       |                            | Zim1                  | zinc finger, imprinted 1          |
|                       |                            | Zscan12               | zinc finger and SCAN domain cor   |
|                       |                            | Zscan4-ps2            |                                   |
| <b>WntE11vsSoxE11</b> |                            | <b>WntE11vsWntE15</b> |                                   |
| <b>W11vsS11</b>       | <b>Fold Change &gt;1.2</b> | <b>W11vsW15</b>       | <b>Fold Change &gt;1.2</b>        |
| Foxd1                 | forkhead box D1            | Adnp2                 | ADNP homeobox 2                   |

|         |                                   |           |                                   |
|---------|-----------------------------------|-----------|-----------------------------------|
| Neurod1 | neurogenic differentiation 1; neu | Alx1      | ALX homeobox 1                    |
| Nr2f1   | nuclear receptor subfamily 2, gro | Arid3a    | AT rich interactive domain 3A (B  |
| Prrx1   | paired related homeobox 1         | Atf1      | predicted gene 1862; activating   |
| Satb2   | special AT-rich sequence binding  | Creb5     | RIKEN cDNA 9430076C15 gene; c     |
|         |                                   | Csda      | cold shock domain protein A       |
|         |                                   | E2f1      | E2F transcription factor 1        |
|         |                                   | E2f3      | E2F transcription factor 3        |
|         |                                   | E2f4      | E2F transcription factor 4        |
|         |                                   | E2f5      | E2F transcription factor 5        |
|         |                                   | E2f6      | E2F transcription factor 6        |
|         |                                   | E2f7      | E2F transcription factor 7        |
|         |                                   | E2f8      | E2F transcription factor 8        |
|         |                                   | Elk3      | ELK3, member of ETS oncogene      |
|         |                                   | Erf       | Ets2 repressor factor             |
|         |                                   | Erg       | avian erythroblastosis virus E-26 |
|         |                                   | Ets1      | E26 avian leukemia oncogene 1,    |
|         |                                   | Etv4      | ets variant gene 4 (E1A enhance   |
|         |                                   | Etv5      | ets variant gene 5                |
|         |                                   | Etv6      | ets variant gene 6 (TEL oncogene  |
|         |                                   | Fli1      | Friend leukemia integration 1     |
|         |                                   | Foxc1     | forkhead box C1                   |
|         |                                   | Foxc2     | forkhead box C2                   |
|         |                                   | Foxd1     | forkhead box D1                   |
|         |                                   | Foxf1a    | forkhead box F1a                  |
|         |                                   | Foxf2     | forkhead box F2                   |
|         |                                   | Foxm1     | forkhead box M1; RIKEN cDNA 4     |
|         |                                   | Foxp2     | forkhead box P2                   |
|         |                                   | Foxp4     | forkhead box P4                   |
|         |                                   | Gabpa     | GA repeat binding protein, alpha  |
|         |                                   | Gata3     | GATA binding protein 3            |
|         |                                   | Gatad2a   | similar to Transcriptional repres |
|         |                                   | Gli1      | GLI-Kruppel family member GLI1    |
|         |                                   | Gli2      | GLI-Kruppel family member GLI2    |
|         |                                   | Glis2     | GLIS family zinc finger 2         |
|         |                                   | Gzf1      | GDNF-inducible zinc finger prote  |
|         |                                   | Hes1      | hairy and enhancer of split 1 (Dr |
|         |                                   | Hesx1     | homeo box gene expressed in ES    |
|         |                                   | Heyl      | hairy/enhancer-of-split related v |
|         |                                   | Hmx1      | H6 homeo box 1                    |
|         |                                   | Homez     | homeodomain leucine zipper-en     |
|         |                                   | Hoxa1     | homeo box A1                      |
|         |                                   | Hsf1      | heat shock factor 1               |
|         |                                   | I1C0022H1 | RIKEN cDNA I1C0022H11 gene; s     |
|         |                                   | Isl1      | ISL1 transcription factor, LIM/hc |
|         |                                   | Jarid2    | jumonji, AT rich interactive dom  |
|         |                                   | Lbh       | limb-bud and heart                |

|  |         |                                                                      |
|--|---------|----------------------------------------------------------------------|
|  | Lef1    | lymphoid enhancer binding factor 1                                   |
|  | Mef2c   | myocyte enhancer factor 2C                                           |
|  | Meis2   | Meis homeobox 2                                                      |
|  | Mkx     | mohawk homeobox                                                      |
|  | Mta1    | similar to metastasis-associated gene 1                              |
|  | Mta2    | metastasis-associated gene family 2                                  |
|  | Mtf1    | metal response element binding factor 1                              |
|  | Myb     | myeloblastosis oncogene                                              |
|  | Myc     | myelocytomatosis oncogene                                            |
|  | Mycn    | v-myc myelocytomatosis viral related oncogene                        |
|  | Neurod1 | neurogenic differentiation 1; neurogenic differentiation 1           |
|  | NeuroD4 | neurogenic differentiation 4                                         |
|  | Nfatc3  | nuclear factor of activated T-cell 3                                 |
|  | Nfe2l2  | nuclear factor, erythroid derived 2-like 2                           |
|  | Nfkb1   | nuclear factor of kappa light chain gene enhancer in B-cells 1       |
|  | Nfya    | nuclear transcription factor-Y alpha                                 |
|  | Nfyc    | nuclear transcription factor-Y gamma                                 |
|  | Nr2f1   | nuclear receptor subfamily 2, group 1, member 1                      |
|  | Nr2f2   | similar to COUP-TFI; nuclear receptor subfamily 2, group 2, member 2 |
|  | Nr2f6   | nuclear receptor subfamily 2, group 2, member 6                      |
|  | Patz1   | POZ (BTB) and AT hook containing domain protein 1                    |
|  | Pax3    | paired box gene 3                                                    |
|  | Pbx2    | pre B-cell leukemia transcription factor 2                           |
|  | Plagl2  | pleiomorphic adenoma gene-like 2                                     |
|  | Pou4f1  | POU domain, class 4, transcription factor 1                          |
|  | Preb    | prolactin regulatory element binding factor                          |
|  | Prox1   | prospero-related homeobox 1                                          |
|  | Prrx1   | paired related homeobox 1                                            |
|  | Rara    | retinoic acid receptor, alpha                                        |
|  | Rest    | RE1-silencing transcription factor                                   |
|  | Rex2    | hypothetical protein LOC100048                                       |
|  | Rxra    | retinoid X receptor alpha; similar to RXR                            |
|  | Rxrg    | retinoid X receptor gamma                                            |
|  | Sall4   | sal-like 4 (Drosophila)                                              |
|  | Six1    | sine oculis-related homeobox 1                                       |
|  | Six2    | similar to Homeobox protein SIX2                                     |
|  | Six4    | sine oculis-related homeobox 4                                       |
|  | Smad3   | MAD homolog 3 (Drosophila)                                           |
|  | Sox10   | SRY-box containing gene 10                                           |
|  | Sox5    | SRY-box containing gene 5                                            |
|  | Sox8    | SRY-box containing gene 8                                            |
|  | Sox9    | SRY-box containing gene 9                                            |
|  | Sp1     | trans-acting transcription factor 1                                  |
|  | Tbx20   | T-box 20                                                             |
|  | Tcf3    | transcription factor E2a                                             |
|  | Tcf7    | transcription factor 7, T-cell specific                              |

|                       |                                                  |                         |                                                   |
|-----------------------|--------------------------------------------------|-------------------------|---------------------------------------------------|
|                       |                                                  | Tcfap2a                 | transcription factor AP-2, alpha                  |
|                       |                                                  | Tcfap2b                 | transcription factor AP-2 beta                    |
|                       |                                                  | Tcfap2c                 | transcription factor AP-2, gamma                  |
|                       |                                                  | Tead2                   | TEA domain family member 2                        |
|                       |                                                  | Tead3                   | TEA domain family member 3                        |
|                       |                                                  | Tfdp1                   | predicted gene 7390; transcription factor Dp 2    |
|                       |                                                  | Tfdp2                   | transcription factor Dp 2                         |
|                       |                                                  | Tgif1                   | TGFB-induced factor homeobox                      |
|                       |                                                  | Trp53                   | transformation related protein 53                 |
|                       |                                                  | Trps1                   | trichorhinophalangeal syndrome 1                  |
|                       |                                                  | Twist1                  | twist homolog 1 (Drosophila)                      |
|                       |                                                  | Twist2                  | twist homolog 2 (Drosophila)                      |
|                       |                                                  | Ybx1                    | predicted gene 6540; predicted                    |
|                       |                                                  | Zbtb16                  | zinc finger and BTB domain containing protein 16  |
|                       |                                                  | Zeb2                    | zinc finger E-box binding homeobox 2              |
|                       |                                                  | Zfp101                  | zinc finger protein 101                           |
|                       |                                                  | Zfp191                  | zinc finger protein 191                           |
|                       |                                                  | Zfp334                  | zinc finger protein 334                           |
|                       |                                                  | Zfp386                  | zinc finger protein 386 (Kruppel-like)            |
|                       |                                                  | Zfp566                  | zinc finger protein 566                           |
|                       |                                                  | Zfp568                  | zinc finger protein 568                           |
|                       |                                                  | Zfp58                   | zinc finger protein 58                            |
|                       |                                                  | Zfp617                  | zinc finger protein 617                           |
|                       |                                                  | Zfp69                   | zinc finger protein 69                            |
|                       |                                                  | Zfp809                  | zinc finger protein 809                           |
|                       |                                                  | Zfp820                  | hypothetical protein LOC100044                    |
|                       |                                                  | Zfp931                  | RIKEN cDNA 2810021G02 gene                        |
|                       |                                                  | Zscan12                 | zinc finger and SCAN domain containing protein 12 |
|                       |                                                  | Zscan29                 | zinc finger SCAN domains 29                       |
| <b>SoxE15vsWntE15</b> |                                                  | <b>SoxE15 vs SoxE11</b> |                                                   |
| <b>S15vsW15</b>       | <b>Fold Change &gt;1.2</b>                       | <b>S15vsS11</b>         | <b>Fold Change &gt;1.2</b>                        |
| Arntl                 | aryl hydrocarbon receptor nuclear translocator 1 | Aff1                    | AF4/FMR2 family, member 1                         |
| Bcl6                  | B-cell leukemia/lymphoma 6                       | Ahr                     | aryl-hydrocarbon receptor                         |
| Cebpd                 | CCAAT/enhancer binding protein 4                 | Arntl                   | aryl hydrocarbon receptor nuclear translocator 1  |
| Csda                  | cold shock domain protein A                      | Atf3                    | activating transcription factor 3                 |
| E2f3                  | E2F transcription factor 3                       | Bcl6                    | B-cell leukemia/lymphoma 6                        |
| E2f5                  | E2F transcription factor 5                       | Cebpa                   | CCAAT/enhancer binding protein 4                  |
| E2f7                  | E2F transcription factor 7                       | Cebpd                   | CCAAT/enhancer binding protein 4                  |
| E2f8                  | E2F transcription factor 8                       | Csrnp3                  | cysteine-serine-rich nuclear protein 3            |
| Elk3                  | ELK3, member of ETS oncogene family              | Cux1                    | cut-like homeobox 1                               |
| Ets1                  | E26 avian leukemia oncogene 1, 5                 | Cux2                    | cut-like homeobox 2                               |
| Etv5                  | ets variant gene 5                               | Dach1                   | dachshund 1 (Drosophila)                          |
| Etv6                  | ets variant gene 6 (TEL oncogene)                | Dlx5                    | distal-less homeobox 5                            |
| Foxd3                 | forkhead box D3                                  | Dlx6                    | distal-less homeobox 6                            |
| Foxm1                 | forkhead box M1; RIKEN cDNA 49                   | Ebf1                    | early B-cell factor 1                             |
| Foxn2                 | forkhead box N2                                  | Ebf3                    | early B-cell factor 3                             |

|         |                                      |         |                                    |
|---------|--------------------------------------|---------|------------------------------------|
| Foxo1   | forkhead box O1                      | Ebf4    | early B-cell factor 4              |
| Hdac1   | similar to histone deacetylase HD    | Egr1    | early growth response 1            |
| Hes1    | hairy and enhancer of split 1 (Dro   | Egr2    | early growth response 2            |
| Hey2    | hairy/enhancer-of-split related w    | Esrrg   | estrogen-related receptor gamm     |
| Hsf1    | heat shock factor 1                  | Ets2    | E26 avian leukemia oncogene 2,     |
| Irf1    | interferon regulatory factor 1       | Etv1    | ets variant gene 1                 |
| Mef2c   | myocyte enhancer factor 2C           | Fos     | FBJ osteosarcoma oncogene          |
| Mkl2    | MKL/myocardin-like 2                 | Foxj2   | forkhead box J2                    |
| Myb     | myeloblastosis oncogene              | Foxj3   | forkhead box J3                    |
| Myc     | myelocytomatosis oncogene            | Foxo1   | forkhead box O1                    |
| Neurog3 | neurogenin 3                         | Foxo3   | forkhead box O3                    |
| Nfe2l2  | nuclear factor, erythroid derived    | Foxo6   | forkhead box O6                    |
| Nfia    | nuclear factor I/A                   | Gatad2b | GATA zinc finger domain contain    |
| Nfkb1   | nuclear factor of kappa light poly   | Hey2    | hairy/enhancer-of-split related v  |
| Nfyb    | nuclear transcription factor-Y bet   | Hoxa2   | homeo box A2                       |
| Nfyc    | nuclear transcription factor-Y gan   | Hoxa3   | homeo box A3                       |
| Nr2f1   | nuclear receptor subfamily 2, gro    | Hoxa4   | homeo box A4                       |
| Nr2f2   | similar to COUP-TFI; nuclear rece    | Hoxa5   | homeo box A5                       |
| Nr4a1   | nuclear receptor subfamily 4, gro    | Hoxa6   | homeo box A6                       |
| Plagl2  | pleiomorphic adenoma gene-like       | Hoxb5   | homeo box B5                       |
| Rela    | v-rel reticuloendotheliosis viral or | Hoxb6   | homeo box B6                       |
| Relb    | avian reticuloendotheliosis viral (  | Hoxb8   | homeo box B8                       |
| Rest    | RE1-silencing transcription factor   | Hoxc4   | homeo box C4                       |
| Rex2    | hypothetical protein LOC1000488      | Hoxc5   | homeo box C5                       |
| Smad3   | MAD homolog 3 (Drosophila)           | Hoxd3   | homeo box D3                       |
| Sox10   | SRY-box containing gene 10           | Irf1    | interferon regulatory factor 1     |
| Sox5    | SRY-box containing gene 5            | Klf12   | Kruppel-like factor 12             |
| Srf     | serum response factor                | Klf2    | Kruppel-like factor 2 (lung)       |
| St18    | suppression of tumorigenicity 18     | Klf4    | Kruppel-like factor 4 (gut)        |
| Tcf3    | transcription factor E2a             | Klf6    | Kruppel-like factor 6              |
| Tcfap2a | transcription factor AP-2, alpha     | Klf7    | Kruppel-like factor 7 (ubiquitous  |
| Tgfb1   | TGFB-induced factor homeobox 1       | Meis1   | Meis homeobox 1                    |
| Trp53   | transformation related protein 53    | Mxi1    | Max interacting protein 1          |
| Zfp238  | zinc finger protein 238              | Myt1    | myelin transcription factor 1      |
| Zfp568  | zinc finger protein 568              | Myt1l   | myelin transcription factor 1-like |
|         |                                      | Neurog3 | neurogenin 3                       |
|         |                                      | Nfatc1  | nuclear factor of activated T-cell |
|         |                                      | Nfe2l3  | nuclear factor, erythroid derived  |
|         |                                      | Nfia    | nuclear factor I/A                 |
|         |                                      | Nfib    | nuclear factor I/B                 |
|         |                                      | Nfil3   | similar to NFIL3/E4BP4 transcrip   |
|         |                                      | Nfix    | nuclear factor I/X                 |
|         |                                      | Nr1d2   | nuclear receptor subfamily 1, gro  |
|         |                                      | Nr1h4   | nuclear receptor subfamily 1, gro  |
|         |                                      | Nr2c2   | nuclear receptor subfamily 2, gro  |
|         |                                      | Nr3c1   | nuclear receptor subfamily 3, gro  |

|  |  |          |                                                                       |
|--|--|----------|-----------------------------------------------------------------------|
|  |  | Nr4a1    | nuclear receptor subfamily 4, group 1, class A, member 1              |
|  |  | Nr4a2    | nuclear receptor subfamily 4, group 1, class A, member 2              |
|  |  | Phox2a   | paired-like homeobox 2a                                               |
|  |  | Pknox1   | Pbx/knotted 1 homeobox                                                |
|  |  | Rarb     | retinoic acid receptor, beta                                          |
|  |  | Rbak     | RB-associated KRAB repressor                                          |
|  |  | Relb     | avian reticuloendotheliosis viral repressor 1                         |
|  |  | Rora     | RAR-related orphan receptor alpha                                     |
|  |  | Rorc     | RAR-related orphan receptor gamma                                     |
|  |  | Satb1    | special AT-rich sequence binding protein 1                            |
|  |  | Satb2    | special AT-rich sequence binding protein 2                            |
|  |  | Sox6     | SRY-box containing gene 6                                             |
|  |  | Spen     | SPEN homolog, transcriptional repressor                               |
|  |  | St18     | suppression of tumorigenicity 18                                      |
|  |  | Stat3    | similar to Stat3B; signal transducer and activator of transcription 3 |
|  |  | Stat5b   | signal transducer and activator of transcription 5B                   |
|  |  | Tbx3     | T-box 3                                                               |
|  |  | Tcf4     | transcription factor 4                                                |
|  |  | Tcf7l2   | transcription factor 7-like 2, T-cell specific                        |
|  |  | Thra     | thyroid hormone receptor alpha                                        |
|  |  | Tshz1    | teashirt zinc finger family member 1                                  |
|  |  | Zeb1     | zinc finger E-box binding homeobox 1                                  |
|  |  | Zfhx4    | zinc finger homeodomain 4                                             |
|  |  | Zfp263   | zinc finger protein 263                                               |
|  |  | Zfp445   | zinc finger protein 445                                               |
|  |  | Zfp612   | zinc finger protein 612                                               |
|  |  | Zfp788   | zinc finger protein 788                                               |
|  |  | Zfp941   | cDNA sequence BC066028                                                |
|  |  | Zhx3     | zinc fingers and homeoboxes 3                                         |
|  |  | Zkscan14 | zinc finger with KRAB and SCAN domain 14                              |
|  |  | Zkscan2  | zinc finger with KRAB and SCAN domain 2                               |
|  |  |          |                                                                       |
|  |  |          |                                                                       |

| <b>WntE15vsSoxE15</b> |                                        | <b>WntE15vsWntE11</b> |                                            |
|-----------------------|----------------------------------------|-----------------------|--------------------------------------------|
| <b>W15vsS15</b>       | <b>Fold Change &gt;1.2</b>             | <b>W15vsW11</b>       | <b>Fold Change &gt;1.2</b>                 |
| Csrnp3                | cysteine-serine-rich nuclear protein 3 | Ahr                   | aryl-hydrocarbon receptor                  |
| Cux2                  | cut-like homeobox 2                    | Ar                    | androgen receptor                          |
| Ebf1                  | early B-cell factor 1                  | Atf2                  | activating transcription factor 2          |
| Etv1                  | ets variant gene 1                     | Atf6                  | activating transcription factor 6          |
| Hlf                   | hepatic leukemia factor                | Atf7                  | activating transcription factor 7          |
| Hoxb5                 | homeo box B5                           | Carf                  | calcium response factor                    |
| Hoxb6                 | homeo box B6                           | Cebpa                 | CCAAT/enhancer binding protein 1           |
| Hoxc4                 | homeo box C4                           | Clock                 | circadian locomotor output cycle protein 1 |
| Jazf1                 | JAZF zinc finger 1                     | Crebl2                | cAMP responsive element binding protein 2  |
| Klf7                  | Kruppel-like factor 7 (ubiquitous)     | Csrnp3                | cysteine-serine-rich nuclear protein 3     |
| Meis1                 | Meis homeobox 1                        | Cux2                  | cut-like homeobox 2                        |



|         |                                       |        |                                    |
|---------|---------------------------------------|--------|------------------------------------|
| Meis3   | Meis homeobox 3                       | Dach1  | dachshund 1 (Drosophila)           |
| Myt1l   | myelin transcription factor 1-like    | Dlx3   | distal-less homeobox 3             |
| Onecut2 | one cut domain, family member 2       | Ebf1   | early B-cell factor 1              |
| Pbx3    | similar to PBX3a; pre B-cell leukemia | Ebf3   | early B-cell factor 3              |
| Pgr     | progesterone receptor                 | Ebf4   | early B-cell factor 4              |
| Tcf7l2  | transcription factor 7-like 2, T-cell | Esrrg  | estrogen-related receptor gamma    |
| Thra    | thyroid hormone receptor alpha;       | Ets2   | E26 avian leukemia oncogene 2,     |
| Trps1   | trichorhinophalan                     | Etv1   | ets variant gene 1                 |
| Tshz3   | teashirt zinc finger family member    | Foxj2  | forkhead box J2                    |
| Zfp40   | zinc finger protein 40                | Foxn3  | forkhead box N3                    |
| Zfp52   | zinc finger protein 52                | Foxo1  | forkhead box O1                    |
| Zfp57   | zinc finger protein 57                | Foxo3  | forkhead box O3                    |
| Zfp60   | similar to Zinc finger protein 60; z  | Hey2   | hairy/enhancer-of-split related v  |
| Zfp78   | zinc finger protein 78                | Hivep2 | human immunodeficiency virus       |
| Zfp811  | zinc finger protein 811               | Hlf    | hepatic leukemia factor            |
| Zfp9    | zinc finger protein 9                 | Hoxa2  | homeo box A2                       |
| Zfp941  | cDNA sequence BC066028                | Hoxa3  | homeo box A3                       |
|         |                                       | Hoxa4  | homeo box A4                       |
|         |                                       | Hoxa5  | homeo box A5                       |
|         |                                       | Hoxa6  | homeo box A6                       |
|         |                                       | Hoxb5  | homeo box B5                       |
|         |                                       | Hoxb6  | homeo box B6                       |
|         |                                       | Hoxc4  | homeo box C4                       |
|         |                                       | Hoxc5  | homeo box C5                       |
|         |                                       | Hoxd3  | homeo box D3                       |
|         |                                       | Hoxd4  | homeo box D4                       |
|         |                                       | Irf2   | interferon regulatory factor 2     |
|         |                                       | Jazf1  | JAZF zinc finger 1                 |
|         |                                       | Klf7   | Kruppel-like factor 7 (ubiquitous  |
|         |                                       | Mafg   | similar to mafG; v-maf musculo     |
|         |                                       | Mef2a  | similar to Myocyte enhancer fac    |
|         |                                       | Meis1  | Meis homeobox 1                    |
|         |                                       | Mycl1  | v-myc myelocytomatosis viral or    |
|         |                                       | Myt1   | myelin transcription factor 1      |
|         |                                       | Myt1l  | myelin transcription factor 1-like |
|         |                                       | Nfatc1 | nuclear factor of activated T-cell |
|         |                                       | Nfe2l3 | nuclear factor, erythroid derived  |
|         |                                       | Nfia   | nuclear factor I/A                 |
|         |                                       | Nfib   | nuclear factor I/B                 |
|         |                                       | Nfil3  | similar to NFIL3/E4BP4 transcrip   |
|         |                                       | Nfix   | nuclear factor I/X                 |
|         |                                       | Nr1d2  | nuclear receptor subfamily 1, gro  |
|         |                                       | Nr2c2  | nuclear receptor subfamily 2, gro  |
|         |                                       | Nr3c1  | nuclear receptor subfamily 3, gro  |
|         |                                       | Nr4a1  | nuclear receptor subfamily 4, gro  |
|         |                                       | Nr6a1  | nuclear receptor subfamily 6, gro  |



|  |  |         |                                                                       |
|--|--|---------|-----------------------------------------------------------------------|
|  |  | Onecut2 | one cut domain, family member                                         |
|  |  | Pbx3    | similar to PBX3a; pre B-cell leukemia                                 |
|  |  | Pgr     | progesterone receptor                                                 |
|  |  | Phox2a  | paired-like homeobox 2a                                               |
|  |  | Pknox1  | Pbx/knotted 1 homeobox                                                |
|  |  | Rarb    | retinoic acid receptor, beta                                          |
|  |  | Rora    | RAR-related orphan receptor alpha                                     |
|  |  | Rorc    | RAR-related orphan receptor gamma                                     |
|  |  | Runx1   | runt related transcription factor 1                                   |
|  |  | Satb2   | special AT-rich sequence binding protein 2                            |
|  |  | Smad9   | MAD homolog 9 (Drosophila)                                            |
|  |  | St18    | suppression of tumorigenicity 18                                      |
|  |  | Stat2   | signal transducer and activator of transcription 2                    |
|  |  | Stat3   | similar to Stat3B; signal transducer and activator of transcription 3 |
|  |  | Stat5b  | signal transducer and activator of transcription 5b                   |
|  |  | Tbx3    | T-box 3                                                               |
|  |  | Tcf4    | transcription factor 4                                                |
|  |  | Thra    | thyroid hormone receptor alpha                                        |
|  |  | Tshz1   | teashirt zinc finger family member 1                                  |
|  |  | Tshz3   | teashirt zinc finger family member 3                                  |
|  |  | Zeb1    | zinc finger E-box binding homeobox 1                                  |
|  |  | Zfhx2   | zinc finger homeobox 2; similar to Zfhx1                              |
|  |  | Zfhx4   | zinc finger homeodomain 4                                             |
|  |  | Zfp40   | zinc finger protein 40                                                |
|  |  | Zfp445  | zinc finger protein 445                                               |
|  |  | Zfp551  | zinc finger protein 551                                               |
|  |  | Zfp57   | zinc finger protein 57                                                |
|  |  | Zfp59   | zinc finger protein 59; predicted                                     |
|  |  | Zfp78   | zinc finger protein 78                                                |
|  |  | Zfp788  | zinc finger protein 788                                               |
|  |  | Zfp811  | zinc finger protein 811                                               |
|  |  | Zfp9    | zinc finger protein 9                                                 |
|  |  | Zfp941  | cDNA sequence BC066028                                                |
|  |  | Zhx3    | zinc fingers and homeoboxes 3                                         |
|  |  | Zkscan2 | zinc finger with KRAB and SCAN domain                                 |

| <b>SoxE11vsCtrlE11</b> |                                                  | <b>SoxE15vsCtrlE15</b> |                                                  |
|------------------------|--------------------------------------------------|------------------------|--------------------------------------------------|
| <b>S11vsC11</b>        | <b>Fold Change &gt;1.2</b>                       | <b>S15vsC15</b>        | <b>Fold Change &gt;1.2</b>                       |
| Ascl1                  | achaete-scute complex homolog 1                  | Arnt2                  | aryl hydrocarbon receptor nuclear translocator 2 |
| Arntl                  | aryl hydrocarbon receptor nuclear translocator 1 | Arntl                  | aryl hydrocarbon receptor nuclear translocator 1 |
| Ahr                    | aryl-hydrocarbon receptor                        | Ascl1                  | achaete-scute complex homolog 1                  |
| Atoh1                  | atonal homolog 1 (Drosophila)                    | Atoh1                  | atonal homolog 1 (Drosophila)                    |
| Creb3                  | cAMP responsive element binding protein 3        | Bach2                  | BTB and CNC homology 2                           |
| Crem                   | cAMP responsive element modulator                | Cebpg                  | CCAAT/enhancer binding protein gamma             |
| Ctnnb1                 | catenin (cadherin associated protein) 1          | Cphx                   | predicted gene 2135; predicted                   |
| Dlx1                   | distal-less homeobox 1                           | Crem                   | cAMP responsive element modulator                |

|         |                                    |        |                                   |
|---------|------------------------------------|--------|-----------------------------------|
| Dlx2    | distal-less homeobox 2             | Csrnp2 | cysteine-serine-rich nuclear prot |
| Dlx5    | distal-less homeobox 5             | Csrnp3 | cysteine-serine-rich nuclear prot |
| Ets1    | E26 avian leukemia oncogene 1, 5   | Cux2   | cut-like homeobox 2               |
| Elf2    | E74-like factor 2                  | Dlx1   | distal-less homeobox 1            |
| Ebf3    | early B-cell factor 3              | Dlx2   | distal-less homeobox 2            |
| Etv1    | ets variant gene 1                 | Dlx5   | distal-less homeobox 5            |
| Etv5    | ets variant gene 5                 | Dlx6   | distal-less homeobox 6            |
| Foxd3   | forkhead box D3                    | Dmrt3  | doublesex and mab-3 related tra   |
| Foxn2   | forkhead box N2                    | Dmrta1 | doublesex and mab-3 related tra   |
| Foxo1   | forkhead box O1                    | Duxbl  | predicted gene 10394; predicted   |
| Gzf1    | GDNF-inducible zinc finger protei  | E2f5   | E2F transcription factor 5        |
| Glis2   | GLIS family zinc finger 2          | Ebf3   | early B-cell factor 3             |
| Hes1    | hairy and enhancer of split 1 (Dro | Elf2   | E74-like factor 2                 |
| Hey2    | hairy/enhancer-of-split related w  | Etv1   | ets variant gene 1                |
| Heyl    | hairy/enhancer-of-split related w  | Etv5   | ets variant gene 5                |
| Hand2   | heart and neural crest derivatives | Foxb1  | forkhead box B1                   |
| Hoxb2   | homeo box B2                       | Foxd3  | forkhead box D3                   |
| Hoxb4   | homeo box B4                       | Foxn2  | forkhead box N2                   |
| Hoxb5   | homeo box B5                       | Foxo1  | forkhead box O1                   |
| Hoxd1   | homeo box D1                       | Foxo3  | forkhead box O3                   |
| Hoxd3   | homeo box D3                       | Gm239  | predicted gene 239                |
| Hivep2  | human immunodeficiency virus ty    | Hand2  | heart and neural crest derivative |
| Irf2    | interferon regulatory factor 2     | Hdac2  | histone deacetylase 2             |
| Irf6    | interferon regulatory factor 6     | Hdx    | highly divergent homeobox         |
| Jarid2  | jumonji, AT rich interactive doma  | Hes6   | hairy and enhancer of split 6 (Dr |
| Jun     | Jun oncogene                       | Hey2   | hairy/enhancer-of-split related v |
| Klf7    | Kruppel-like factor 7 (ubiquitous) | Hmx2   | H6 homeo box 2                    |
| Lbh     | limb-bud and heart                 | Hmx3   | H6 homeo box 3                    |
| Lef1    | lymphoid enhancer binding factor   | Hoxa1  | homeo box A1                      |
| Smad1   | MAD homolog 1 (Drosophila)         | Hoxa2  | homeo box A2                      |
| Smad2   | MAD homolog 2 (Drosophila)         | Hoxa3  | homeo box A3                      |
| Mitf    | microphthalmia-associated transc   | Hoxa4  | homeo box A4                      |
| Myt1    | myelin transcription factor 1      | Hoxa5  | homeo box A5                      |
| Myt1l   | myelin transcription factor 1-like | Hoxb2  | homeo box B2                      |
| Myc     | myelocytomatosis oncogene          | Hoxb3  | homeo box B3                      |
| Mef2c   | myocyte enhancer factor 2C         | Hoxb4  | homeo box B4                      |
| Notch1  | Notch gene homolog 1 (Drosophi     | Hoxb5  | homeo box B5                      |
| Nr4a1   | nuclear receptor subfamily 4, gro  | Hoxc4  | homeo box C4                      |
| Nfyb    | nuclear transcription factor-Y bet | Hoxd1  | homeo box D1                      |
| Onecut2 | one cut domain, family member 2    | Hoxd3  | homeo box D3                      |
| Pax3    | paired box gene 3                  | Hsf2   | heat shock factor 2               |
| Phox2a  | paired-like homeobox 2a            | Ilf2   | interleukin enhancer binding fac  |
| Phox2b  | paired-like homeobox 2b            | Jarid2 | jumonji, AT rich interactive dom  |
| Pou4f1  | POU domain, class 4, transcriptio  | Jazf1  | JAZF zinc finger 1                |
| Pou4f2  | POU domain, class 4, transcriptio  | Klf15  | Kruppel-like factor 15            |
| Patz1   | POZ (BTB) and AT hook containin    | Klf7   | Kruppel-like factor 7 (ubiquitous |

|            |                                      |         |                                    |
|------------|--------------------------------------|---------|------------------------------------|
| Duxbl      | predicted gene 10394; predicted      | Lbh     | limb-bud and heart                 |
| Cphx       | predicted gene 2135; predicted g     | Lcor    | ligand dependent nuclear recept    |
| Gm239      | predicted gene 239                   | Lef1    | lymphoid enhancer binding facto    |
| Tfdp1      | predicted gene 7390; transcriptio    | Lhx1    | LIM homeobox protein 1             |
| Preb       | prolactin regulatory element binc    | Mecp2   | methyl CpG binding protein 2       |
| Pa2g4      | proliferation-associated 2G4; prei   | Mef2c   | myocyte enhancer factor 2C         |
| Prox1      | prospero-related homeobox 1          | Meis3   | similar to Myeloid ecotropic vira  |
| Nkap       | reproductive homeobox 3B; UPF3       | Mitf    | microphthalmia-associated trans    |
| Rcor2      | REST corepressor 2                   | Mta1    | similar to metastasis-associated   |
| Rara       | retinoic acid receptor, alpha        | Mycl1   | v-myc myelocytomatosis viral or    |
| Rarb       | retinoic acid receptor, beta         | Mycn    | v-myc myelocytomatosis viral re    |
| Creb5      | RIKEN cDNA 9430076C15 gene; c        | Myt1    | myelin transcription factor 1      |
| Etv2       | similar to ETS related protein 71;   | Myt1l   | myelin transcription factor 1-like |
| Hdac1      | similar to histone deacetylase HD    | NeuroD4 | neurogenic differentiation 4       |
| Mta1       | similar to metastasis-associated p   | Nfe2l3  | nuclear factor, erythroid derive   |
| Satb1      | special AT-rich sequence binding     | Nfyb    | nuclear transcription factor-Y be  |
| Sox10      | SRY-box containing gene 10           | Nkap    | reproductive homeobox 3B; UPF      |
| Sox4       | SRY-box containing gene 19; SRY-     | Notch1  | Notch gene homolog 1 (Drosoph      |
| Sox2       | SRY-box containing gene 2            | Nr1d2   | nuclear receptor subfamily 1, gr   |
| Sox5       | SRY-box containing gene 5            | Nr2c1   | nuclear receptor subfamily 2, gr   |
| Sox8       | SRY-box containing gene 8            | Nr2c2   | nuclear receptor subfamily 2, gr   |
| St18       | suppression of tumorigenicity 18     | Nr6a1   | nuclear receptor subfamily 6, gr   |
| Tbx2       | T-box 2                              | Otx2    | orthodenticle homolog 2 (Droso     |
| Tbx20      | T-box 20                             | Pbx4    | pre-B-cell leukemia homeobox 4     |
| Tbx3       | T-box 3                              | Phox2a  | paired-like homeobox 2a            |
| Tshz1      | teashirt zinc finger family membe    | Phox2b  | paired-like homeobox 2b            |
| Tcf25      | transcription factor 25 (basic heli  | Pou2f1  | POU domain, class 2, transcripti   |
| Tcf4       | transcription factor 4               | Pou3f3  | POU domain, class 3, transcripti   |
| Tcfap2b    | transcription factor AP-2 beta       | Pou4f1  | POU domain, class 4, transcripti   |
| Tcfap2a    | transcription factor AP-2, alpha     | Prox1   | prospero-related homeobox 1        |
| Mycn       | v-myc myelocytomatosis viral rel     | Prrxl1  | paired related homeobox protei     |
| Rela       | v-rel reticuloendotheliosis viral or | Rara    | retinoic acid receptor, alpha      |
| Zbtb16     | zinc finger and BTB domain conta     | Rarb    | retinoic acid receptor, beta       |
| Zbtb38     | zinc finger and BTB domain conta     | Rcor2   | REST corepressor 2                 |
| Zscan4-ps2 | zinc finger and SCAN domain con      | Rere    | arginine glutamic acid dipeptide   |
| Zeb2       | zinc finger E-box binding homeob     | Rhox12  | reproductive homeobox 12           |
| Zfhx2      | zinc finger homeobox 2; similar to   | Sall4   | sal-like 4 (Drosophila)            |
| Zfp238     | zinc finger protein 238              | Satb1   | special AT-rich sequence binding   |
| Zfp334     | zinc finger protein 334              | Satb2   | special AT-rich sequence binding   |
| Zfp617     | zinc finger protein 617              | Smad2   | MAD homolog 2 (Drosophila)         |
| Zfp667     | zinc finger protein 667              | Sox10   | SRY-box containing gene 10         |
| Zfp689     | zinc finger protein 689              | Sox11   | SRY-box containing gene 11         |
| Zfp7       | zinc finger protein 7                | Sox2    | SRY-box containing gene 2          |
| Zfp811     | zinc finger protein 811              | Sox5    | SRY-box containing gene 5          |
| Zscan29    | zinc finger SCAN domains 29          | Sox8    | SRY-box containing gene 8          |
|            |                                      | St18    | suppression of tumorigenicity 18   |

|  |  |         |                                    |
|--|--|---------|------------------------------------|
|  |  | Taf4a   | TAF4A RNA polymerase II, TATA      |
|  |  | Tbx2    | T-box 2                            |
|  |  | Tbx20   | T-box 20                           |
|  |  | Tbx3    | T-box 3                            |
|  |  | Tcf12   | transcription factor 12            |
|  |  | Tcf4    | transcription factor 4             |
|  |  | Tcfap2a | transcription factor AP-2, alpha   |
|  |  | Tcfap2b | transcription factor AP-2 beta     |
|  |  | Tfam    | transcription factor A, mitochon   |
|  |  | Tle4    | transducin-like enhancer of split  |
|  |  | Tlx2    | T-cell leukemia, homeobox 2        |
|  |  | Tlx3    | T-cell leukemia, homeobox 3        |
|  |  | Tshz1   | teashirt zinc finger family memb   |
|  |  | Zbtb38  | zinc finger and BTB domain cont    |
|  |  | Zfhx2   | zinc finger homeobox 2; similar t  |
|  |  | Zfp112  | zinc finger protein 112            |
|  |  | Zfp113  | zinc finger protein 113            |
|  |  | Zfp184  | zinc finger protein 184 (Kruppel-  |
|  |  | Zfp191  | zinc finger protein 191            |
|  |  | Zfp238  | zinc finger protein 238            |
|  |  | Zfp263  | zinc finger protein 263            |
|  |  | Zfp266  | RIKEN cDNA 5730601F06 gene         |
|  |  | Zfp28   | zinc finger protein 28; predicted  |
|  |  | Zfp37   | zinc finger protein 37             |
|  |  | Zfp397  | zinc finger protein 397            |
|  |  | Zfp418  | zinc finger protein 418            |
|  |  | Zfp426  | zinc finger protein 426            |
|  |  | Zfp445  | zinc finger protein 445            |
|  |  | Zfp462  | zinc finger protein 462            |
|  |  | Zfp566  | zinc finger protein 566            |
|  |  | Zfp583  | zinc finger protein 583            |
|  |  | Zfp59   | zinc finger protein 59; predicted  |
|  |  | Zfp60   | similar to Zinc finger protein 60; |
|  |  | Zfp612  | zinc finger protein 612            |
|  |  | Zfp647  | zinc finger protein 647            |
|  |  | Zfp667  | zinc finger protein 667            |
|  |  | Zfp689  | zinc finger protein 689            |
|  |  | Zfp7    | zinc finger protein 7              |
|  |  | Zfp763  | zinc finger protein 763            |
|  |  | Zfp786  | zinc finger protein 786            |
|  |  | Zfp788  | zinc finger protein 788            |
|  |  | Zfp825  | zinc finger protein 825            |
|  |  | Zfp84   | zinc finger protein 84             |
|  |  | Zfp941  | cDNA sequence BC066028             |
|  |  | Zfp945  | RIKEN cDNA A630033E08 gene         |
|  |  | Zfp946  | RIKEN cDNA 1300003B13 gene;        |

|                        |                                    |                        |                                    |
|------------------------|------------------------------------|------------------------|------------------------------------|
|                        |                                    | Zik1                   | zinc finger protein interacting w  |
|                        |                                    | Zkscan1                | zinc finger with KRAB and SCAN     |
|                        |                                    | Zkscan2                | zinc finger with KRAB and SCAN     |
|                        |                                    | Zscan21                | zinc finger and SCAN domain cor    |
|                        |                                    | Zscan5b                | zinc finger and SCAN domain cor    |
|                        |                                    | Zxdc                   | ZXD family zinc finger C           |
|                        |                                    |                        |                                    |
|                        |                                    |                        |                                    |
|                        |                                    |                        |                                    |
|                        |                                    |                        |                                    |
| <b>WntE11vsCtrlE11</b> |                                    | <b>WntE15vsCtrlE15</b> |                                    |
| <b>W11vsC11</b>        | <b>Fold Change &gt;1.2</b>         | <b>W15vsC15</b>        | <b>Fold Change &gt;1.2</b>         |
| Ahr                    | aryl-hydrocarbon receptor          | Arnt2                  | aryl hydrocarbon receptor nucle    |
| Alx1                   | ALX homeobox 1                     | Arntl                  | aryl hydrocarbon receptor nucle    |
| Arid3a                 | AT rich interactive domain 3A (BR  | Ascl1                  | achaete-scute complex homolog      |
| Arntl                  | aryl hydrocarbon receptor nuclea   | Atf2                   | activating transcription factor 2; |
| Ascl1                  | achaete-scute complex homolog      | Atoh1                  | atonal homolog 1 (Drosophila)      |
| Creb3                  | cAMP responsive element binding    | Bach2                  | BTB and CNC homology 2             |
| Creb5                  | RIKEN cDNA 9430076C15 gene; c      | Cebpg                  | CCAAT/enhancer binding protein     |
| Crem                   | cAMP responsive element modul      | Cphx                   | predicted gene 2135; predicted     |
| Ctnnb1                 | catenin (cadherin associated prot  | Csrnp2                 | cysteine-serine-rich nuclear prot  |
| Dlx1                   | distal-less homeobox 1             | Csrnp3                 | cysteine-serine-rich nuclear prot  |
| Dlx2                   | distal-less homeobox 2             | Cux2                   | cut-like homeobox 2                |
| Dlx5                   | distal-less homeobox 5             | Dlx1                   | distal-less homeobox 1             |
| Dlx6                   | distal-less homeobox 6             | Dlx2                   | distal-less homeobox 2             |
| Dmrta1                 | doublesex and mab-3 related tra    | Dlx3                   | distal-less homeobox 3             |
| Duxbl                  | predicted gene 10394; predicted    | Dlx5                   | distal-less homeobox 5             |
| Ebf3                   | early B-cell factor 3              | Dlx6                   | distal-less homeobox 6             |
| Erf                    | Ets2 repressor factor              | Dmrt3                  | doublesex and mab-3 related tra    |
| Ets1                   | E26 avian leukemia oncogene 1, 5   | Dmrta1                 | doublesex and mab-3 related tra    |
| Etv1                   | ets variant gene 1                 | Duxbl                  | predicted gene 10394; predicted    |
| Etv5                   | ets variant gene 5                 | Ebf3                   | early B-cell factor 3              |
| Foxd1                  | forkhead box D1                    | Etv1                   | ets variant gene 1                 |
| Foxd3                  | forkhead box D3                    | Etv5                   | ets variant gene 5                 |
| Foxn2                  | forkhead box N2                    | Foxo1                  | forkhead box O1                    |
| Foxo1                  | forkhead box O1                    | Hand2                  | heart and neural crest derivative  |
| Glis2                  | GLIS family zinc finger 2          | Hdac2                  | histone deacetylase 2              |
| Gm239                  | predicted gene 239                 | Hdx                    | highly divergent homeobox          |
| Hand2                  | heart and neural crest derivatives | Hes6                   | hairy and enhancer of split 6 (Dr  |
| Hes1                   | hairy and enhancer of split 1 (Dro | Hey2                   | hairy/enhancer-of-split related v  |
| Hey1                   | hairy/enhancer-of-split related w  | Hmx3                   | H6 homeo box 3                     |
| Hivep2                 | human immunodeficiency virus ty    | Hoxa1                  | homeo box A1                       |
| Hoxa1                  | homeo box A1                       | Hoxa2                  | homeo box A2                       |
| Hoxb2                  | homeo box B2                       | Hoxa3                  | homeo box A3                       |
| Hoxb4                  | homeo box B4                       | Hoxa3                  | homeo box A3                       |
| Hoxc11                 | homeo box C11                      | Hoxa4                  | homeo box A4                       |

|        |                                                                       |         |                                                  |
|--------|-----------------------------------------------------------------------|---------|--------------------------------------------------|
| Hoxd3  | homeo box D3                                                          | Hoxa5   | homeo box A5                                     |
| Irf6   | interferon regulatory factor 6                                        | Hoxb2   | homeo box B2                                     |
| Jarid2 | jumonji, AT rich interactive domain                                   | Hoxb3   | homeo box B3                                     |
| Jun    | Jun oncogene                                                          | Hoxb4   | homeo box B4                                     |
| Klf7   | Kruppel-like factor 7 (ubiquitous)                                    | Hoxb5   | homeo box B5                                     |
| Lbh    | limb-bud and heart                                                    | Hoxb6   | homeo box B6                                     |
| Lef1   | lymphoid enhancer binding factor 1                                    | Hoxc4   | homeo box C4                                     |
| Mef2c  | myocyte enhancer factor 2C                                            | Hoxd3   | homeo box D3                                     |
| Meis3  | similar to Myeloid ecotropic viral protein 1                          | Hoxd4   | homeo box D4                                     |
| Mitf   | microphthalmia-associated transcription factor                        | Hsf2    | heat shock factor 2                              |
| Mta1   | similar to metastasis-associated protein 1                            | Ilf2    | interleukin enhancer binding factor 2            |
| Mta2   | metastasis-associated gene family 2                                   | Jarid2  | jumonji, AT rich interactive domain              |
| Mxi1   | Max interacting protein 1                                             | Jazf1   | JAZF zinc finger 1                               |
| Myc    | myelocytomatosis oncogene                                             | Klf13   | Kruppel-like factor 13                           |
| Mycn   | v-myc myelocytomatosis viral related oncogene                         | Klf7    | Kruppel-like factor 7 (ubiquitous)               |
| Myt1   | myelin transcription factor 1                                         | Lhx1    | LIM homeobox protein 1                           |
| Nfe2l1 | nuclear factor, erythroid derived 2-like 1                            | Mef2c   | myocyte enhancer factor 2C                       |
| Nkap   | reproductive homeobox 3B; UPF3                                        | Meis3   | similar to Myeloid ecotropic viral protein 1     |
| Notch1 | Notch gene homolog 1 (Drosophila)                                     | Mxi1    | Max interacting protein 1                        |
| Nr4a1  | nuclear receptor subfamily 4, group 1, member 1                       | Mycl1   | v-myc myelocytomatosis viral related oncogene    |
| Nr4a2  | nuclear receptor subfamily 4, group 1, member 2                       | Mycn    | v-myc myelocytomatosis viral related oncogene    |
| Patz1  | POZ (BTB) and AT hook containing protein 1                            | Myt1    | myelin transcription factor 1                    |
| Pax3   | paired box gene 3                                                     | Myt1l   | myelin transcription factor 1-like               |
| Phox2a | paired-like homeobox 2a                                               | NeuroD4 | neurogenic differentiation 4                     |
| Phox2b | paired-like homeobox 2b                                               | Nfe2l3  | nuclear factor, erythroid derived 2-like 3       |
| Pou3f2 | POU domain, class 3, transcription factor 2                           | Nkap    | reproductive homeobox 3B; UPF3                   |
| Pou4f1 | POU domain, class 4, transcription factor 1                           | Nr1d2   | nuclear receptor subfamily 1, group 2, member 2  |
| Pou4f2 | POU domain, class 4, transcription factor 2                           | Nr2c1   | nuclear receptor subfamily 2, group 1, member 1  |
| Preb   | prolactin regulatory element binding protein                          | Nr2c2   | nuclear receptor subfamily 2, group 1, member 2  |
| Prox1  | prospero-related homeobox 1                                           | Nr6a1   | nuclear receptor subfamily 6, group 1, member 1  |
| Prrx1  | paired related homeobox 1                                             | Onecut2 | one cut domain, family member 2                  |
| Rara   | retinoic acid receptor, alpha                                         | Patz1   | POZ (BTB) and AT hook containing protein 1       |
| Rarb   | retinoic acid receptor, beta                                          | Pbx3    | similar to PBX3a; pre B-cell leukemia homeobox 3 |
| Rela   | v-rel reticuloendotheliosis viral oncogene                            | Pbx4    | pre-B-cell leukemia homeobox 4                   |
| Satb1  | special AT-rich sequence binding protein 1                            | Pgr     | progesterone receptor                            |
| Satb2  | special AT-rich sequence binding protein 2                            | Phox2a  | paired-like homeobox 2a                          |
| Shox2  | short stature homeobox 2                                              | Phox2b  | paired-like homeobox 2b                          |
| Smad1  | MAD homolog 1 (Drosophila)                                            | Pou2f1  | POU domain, class 2, transcription factor 1      |
| Smad2  | MAD homolog 2 (Drosophila)                                            | Pou3f3  | POU domain, class 3, transcription factor 3      |
| Sox10  | SRY-box containing gene 10                                            | Prrxl1  | paired related homeobox protein 1                |
| Sox2   | SRY-box containing gene 2                                             | Rarb    | retinoic acid receptor, beta                     |
| Sox4   | SRY-box containing gene 19; SRY-box containing gene 4                 | Sall4   | sal-like 4 (Drosophila)                          |
| Sox5   | SRY-box containing gene 5                                             | Satb1   | special AT-rich sequence binding protein 1       |
| Sox8   | SRY-box containing gene 8                                             | Satb2   | special AT-rich sequence binding protein 2       |
| St18   | suppression of tumorigenicity 18                                      | Smad2   | MAD homolog 2 (Drosophila)                       |
| Stat3  | similar to Stat3B; signal transducer and activator of transcription 3 | Sox10   | SRY-box containing gene 10                       |



|         |                                                             |          |                                                   |
|---------|-------------------------------------------------------------|----------|---------------------------------------------------|
| Tbx2    | T-box 2                                                     | Sox11    | SRY-box containing gene 11                        |
| Tbx20   | T-box 20                                                    | Sox2     | SRY-box containing gene 2                         |
| Tbx3    | T-box 3                                                     | Sox4     | SRY-box containing gene 19; SRY                   |
| Tcf25   | transcription factor 25 (basic helix-loop-helix)            | Sox5     | SRY-box containing gene 5                         |
| Tcf4    | transcription factor 4                                      | Sox8     | SRY-box containing gene 8                         |
| Tcfap2a | transcription factor AP-2, alpha                            | St18     | suppression of tumorigenicity 18                  |
| Tcfap2b | transcription factor AP-2 beta                              | Tbr1     | T-box brain gene 1                                |
| Tcfap2c | transcription factor AP-2, gamma                            | Tbx2     | T-box 2                                           |
| Tfdp1   | predicted gene 7390; transcription factor domain containing | Tbx20    | T-box 20                                          |
| Tshz1   | teashirt zinc finger family member 1                        | Tbx3     | T-box 3                                           |
| Zbtb16  | zinc finger and BTB domain containing protein 16            | Tcf4     | transcription factor 4                            |
| Zbtb38  | zinc finger and BTB domain containing protein 38            | Tcfap2a  | transcription factor AP-2, alpha                  |
| Zeb2    | zinc finger E-box binding homeobox 2                        | Tlx2     | T-cell leukemia, homeobox 2                       |
| Zfhx2   | zinc finger homeobox 2; similar to Zfp191                   | Tshz1    | teashirt zinc finger family member 1              |
| Zfp191  | zinc finger protein 191                                     | Zbtb38   | zinc finger and BTB domain containing protein 38  |
| Zfp238  | zinc finger protein 238                                     | Zfhx2    | zinc finger homeobox 2; similar to Zfp191         |
| Zfp28   | zinc finger protein 28; predicted gene                      | Zfhx4    | zinc finger homeodomain 4                         |
| Zfp334  | zinc finger protein 334                                     | Zfp112   | zinc finger protein 112                           |
| Zfp617  | zinc finger protein 617                                     | Zfp113   | zinc finger protein 113                           |
| Zfp667  | zinc finger protein 667                                     | Zfp169   | zinc finger protein 169                           |
| Zfp689  | zinc finger protein 689                                     | Zfp191   | zinc finger protein 191                           |
| Zfp7    | zinc finger protein 7                                       | Zfp238   | zinc finger protein 238                           |
| Zfp763  | zinc finger protein 763                                     | Zfp26    | zinc finger protein 26                            |
| Zfp811  | zinc finger protein 811                                     | Zfp28    | zinc finger protein 28; predicted gene            |
| Zfp84   | zinc finger protein 84                                      | Zfp30    | zinc finger protein 30                            |
| Zfp948  | cDNA sequence BC049807                                      | Zfp317   | zinc finger protein 317                           |
| Zkscan1 | zinc finger with KRAB and SCAN domain                       | Zfp37    | zinc finger protein 37                            |
|         |                                                             | Zfp397   | zinc finger protein 397                           |
|         |                                                             | Zfp397os | zinc finger protein 397 opposite strand           |
|         |                                                             | Zfp40    | zinc finger protein 40                            |
|         |                                                             | Zfp418   | zinc finger protein 418                           |
|         |                                                             | Zfp426   | zinc finger protein 426                           |
|         |                                                             | Zfp445   | zinc finger protein 445                           |
|         |                                                             | Zfp462   | zinc finger protein 462                           |
|         |                                                             | Zfp558   | zinc finger protein 558                           |
|         |                                                             | Zfp566   | zinc finger protein 566                           |
|         |                                                             | Zfp57    | zinc finger protein 57                            |
|         |                                                             | Zfp583   | zinc finger protein 583                           |
|         |                                                             | Zfp59    | zinc finger protein 59; predicted gene            |
|         |                                                             | Zfp60    | similar to Zinc finger protein 60; predicted gene |
|         |                                                             | Zfp612   | zinc finger protein 612                           |
|         |                                                             | Zfp617   | zinc finger protein 617                           |
|         |                                                             | Zfp647   | zinc finger protein 647                           |
|         |                                                             | Zfp667   | zinc finger protein 667                           |
|         |                                                             | Zfp689   | zinc finger protein 689                           |
|         |                                                             | Zfp7     | zinc finger protein 7                             |



|                      |                                     |                      |                                   |
|----------------------|-------------------------------------|----------------------|-----------------------------------|
|                      |                                     | Zfp763               | zinc finger protein 763           |
|                      |                                     | Zfp78                | zinc finger protein 78            |
|                      |                                     | Zfp786               | zinc finger protein 786           |
|                      |                                     | Zfp788               | zinc finger protein 788           |
|                      |                                     | Zfp84                | zinc finger protein 84            |
|                      |                                     | Zfp810               | zinc finger protein 810           |
|                      |                                     | Zfp811               | zinc finger protein 811           |
|                      |                                     | Zfp94                | zinc finger protein 94            |
|                      |                                     | Zfp945               | RIKEN cDNA A630033E08 gene        |
|                      |                                     | ZFP946               | RIKEN cDNA 1300003B13 gene;       |
|                      |                                     | Zfp961               | cDNA sequence BC049349            |
|                      |                                     | Zik1                 | zinc finger protein interacting w |
|                      |                                     | Zkscan1              | zinc finger with KRAB and SCAN    |
|                      |                                     | Zkscan2              | zinc finger with KRAB and SCAN    |
|                      |                                     | Zmiz1                | RIKEN cDNA D930049A15 gene;       |
|                      |                                     | Zscan21              | zinc finger and SCAN domain cor   |
|                      |                                     | Zxda                 | zinc finger, X-linked, duplicated |
|                      |                                     |                      |                                   |
|                      |                                     |                      |                                   |
|                      |                                     |                      |                                   |
|                      |                                     |                      |                                   |
| <b>Ctrl11vsWnt11</b> |                                     | <b>Ctrl15vsWnt15</b> |                                   |
| <b>C11vsW11</b>      | <b>Fold Change &gt;1.3</b>          | <b>C15vsW15</b>      | <b>Fold Change &gt;1.3</b>        |
| 5730507C01           | RIKEN cDNA 5730507C01 gene; p       | Aff3                 | AF4/FMR2 family, member 3; sir    |
| Barx1                | BarH-like homeobox 1                | Ahr                  | aryl-hydrocarbon receptor         |
| Bcl6b                | B-cell CLL/lymphoma 6, member       | Arap1                | ArfGAP with RhoGAP domain, ar     |
| Bhlhe41              | basic helix-loop-helix family, men  | Arnt                 | aryl hydrocarbon receptor nucle   |
| Creb3l1              | cAMP responsive element binding     | Atf1                 | predicted gene 1862; activating   |
| Creb3l2              | cAMP responsive element binding     | Atf3                 | activating transcription factor 3 |
| Cux2                 | cut-like homeobox 2                 | Atf7                 | activating transcription factor 7 |
| Dmrt2                | doublesex and mab-3 related tran    | Barx1                | BarH-like homeobox 1              |
| Ebf1                 | early B-cell factor 1               | Bcl10                | B-cell leukemia/lymphoma 10; p    |
| Epas1                | endothelial PAS domain protein 1    | Bcl6                 | B-cell leukemia/lymphoma 6        |
| Erg                  | avian erythroblastosis virus E-26 ( | Bcl6b                | B-cell CLL/lymphoma 6, member     |
| Esrrg                | estrogen-related receptor gamma     | Bhlhe40              | basic helix-loop-helix family, me |
| Ets2                 | E26 avian leukemia oncogene 2, 3    | Bhlhe41              | basic helix-loop-helix family, me |
| Fli1                 | Friend leukemia integration 1       | Cdx2                 | caudal type homeo box 2           |
| Foxc2                | forkhead box C2                     | Cebpa                | CCAAT/enhancer binding protein    |
| Foxf1a               | forkhead box F1a                    | Cebpb                | CCAAT/enhancer binding protein    |
| Foxf2                | forkhead box F2                     | Cebpd                | CCAAT/enhancer binding protein    |
| Foxp1                | forkhead box P1                     | Creb3l1              | cAMP responsive element binding   |
| Foxp2                | forkhead box P2                     | Creb3l2              | cAMP responsive element binding   |
| Foxp4                | forkhead box P4                     | Csda                 | cold shock domain protein A       |
| Gata1                | GATA binding protein 1              | Csrnp1               | cysteine-serine-rich nuclear prot |
| Gata4                | GATA binding protein 4              | E2f7                 | E2F transcription factor 7        |
| Gata6                | GATA binding protein 6              | E2f8                 | E2F transcription factor 8        |

|        |                                      |        |                                     |
|--------|--------------------------------------|--------|-------------------------------------|
| Gli1   | GLI-Kruppel family member GLI1       | Ebf1   | early B-cell factor 1               |
| Gli2   | GLI-Kruppel family member GLI2       | Ebf2   | early B-cell factor 2               |
| Gm98   | predicted gene 98                    | Egr1   | early growth response 1             |
| Hand1  | heart and neural crest derivatives   | Egr2   | early growth response 2             |
| Hhex   | hematopoietically expressed homeo    | Ehf    | ets homologous factor               |
| Hif3a  | hypoxia inducible factor 3, alpha    | Elf1   | E74-like factor 1                   |
| Hlf    | hepatic leukemia factor              | Elk3   | ELK3, member of ETS oncogene        |
| Hlx    | H2.0-like homeobox                   | Elk4   | ELK4, member of ETS oncogene        |
| Hoxa10 | homeo box A10                        | Epas1  | endothelial PAS domain protein      |
| Hoxa11 | homeo box A11                        | Erg    | avian erythroblastosis virus E-26   |
| Hoxa4  | homeo box A4                         | Ets1   | E26 avian leukemia oncogene 1,      |
| Hoxa5  | homeo box A5                         | Ets2   | E26 avian leukemia oncogene 2,      |
| Hoxa6  | homeo box A6                         | Etv6   | ets variant gene 6 (TEL oncogene)   |
| Hoxa9  | homeo box A9                         | Fli1   | Friend leukemia integration 1       |
| Hoxb6  | homeo box B6                         | Fos    | FBJ osteosarcoma oncogene           |
| Hoxb8  | homeo box B8                         | Fosb   | FBJ osteosarcoma oncogene B         |
| Hoxc10 | homeo box C10                        | Fosl2  | similar to fos-like antigen 2; fos- |
| Hoxc4  | homeo box C4                         | Foxa3  | forkhead box A3                     |
| Hoxc5  | homeo box C5                         | Foxc2  | forkhead box C2                     |
| Hoxc6  | homeo box C6                         | Foxf1a | forkhead box F1a                    |
| Hoxc8  | homeo box C8                         | Foxf2  | forkhead box F2                     |
| Hoxc9  | homeo box C9                         | Foxm1  | forkhead box M1; RIKEN cDNA 4       |
| Hoxd10 | homeo box D10                        | Foxp1  | forkhead box P1                     |
| Hoxd11 | homeo box D11                        | Foxp2  | forkhead box P2                     |
| Hoxd4  | homeo box D4                         | Foxp4  | forkhead box P4                     |
| Hoxd8  | homeo box D8                         | Gata3  | GATA binding protein 3              |
| Hoxd9  | homeo box D9                         | Gata6  | GATA binding protein 6              |
| Ikzf1  | IKAROS family zinc finger 1          | Gli1   | GLI-Kruppel family member GLI1      |
| Isl1   | ISL1 transcription factor, LIM/homeo | Gli2   | GLI-Kruppel family member GLI2      |
| Klf1   | Kruppel-like factor 1 (erythroid)    | Gm98   | predicted gene 98                   |
| Klf12  | Kruppel-like factor 12               | Grhl2  | grainyhead-like 2 (Drosophila)      |
| Lhx9   | LIM homeobox protein 9               | Hand1  | heart and neural crest derivative   |
| Meis1  | Meis homeobox 1                      | Hes1   | hairy and enhancer of split 1 (Dr   |
| Meis2  | Meis homeobox 2                      | Hhex   | hematopoietically expressed homeo   |
| Nfatc4 | nuclear factor of activated T-cells  | Hif3a  | hypoxia inducible factor 3, alpha   |
| Nfe2   | nuclear factor, erythroid derived    | Hlx    | H2.0-like homeobox                  |
| Nfe2l2 | nuclear factor, erythroid derived    | Hnf4g  | hepatocyte nuclear factor 4, gan    |
| Nfia   | nuclear factor I/A                   | Hoxa11 | homeo box A11                       |
| Nfib   | nuclear factor I/B                   | Hoxa9  | homeo box A9                        |
| Nkx2-3 | NK2 transcription factor related, I  | Hoxc10 | homeo box C10                       |
| Nkx6-1 | NK6 homeobox 1                       | Hoxc6  | homeo box C6                        |
| Npas3  | neuronal PAS domain protein 3        | Hoxc8  | homeo box C8                        |
| Nr1h5  | nuclear receptor subfamily 1, gro    | Hoxc9  | homeo box C9                        |
| Nr2f2  | similar to COUP-TFI; nuclear recei   | Hoxd10 | homeo box D10                       |
| Nr3c1  | nuclear receptor subfamily 3, gro    | Hoxd11 | homeo box D11                       |
| Nr5a2  | nuclear receptor subfamily 5, gro    | Hoxd8  | homeo box D8                        |

|          |                                     |         |                                    |
|----------|-------------------------------------|---------|------------------------------------|
| Pbx1     | pre B-cell leukemia transcription   | Hoxd9   | homeo box D9                       |
| Pitx2    | paired-like homeodomain transcr     | Ikzf1   | IKAROS family zinc finger 1        |
| Plagl1   | pleiomorphic adenoma gene-like      | lrf1    | interferon regulatory factor 1     |
| Rest     | RE1-silencing transcription factor  | Isl1    | ISL1 transcription factor, LIM/hc  |
| Runx1    | runt related transcription factor 1 | Isx     | intestine specific homeobox        |
| Runx1t1  | runt-related transcription factor 1 | Jdp2    | Jun dimerization protein 2         |
| Sfpi1    | SFFV proviral integration 1         | Junb    | Jun-B oncogene                     |
| Six2     | similar to Homeobox protein SIX2    | Klf12   | Kruppel-like factor 12             |
| Smad5    | MAD homolog 5 (Drosophila)          | Klf2    | Kruppel-like factor 2 (lung)       |
| Smad7    | MAD homolog 7 (Drosophila)          | Klf4    | Kruppel-like factor 4 (gut)        |
| Tbx18    | T-box18                             | Klf5    | Kruppel-like factor 5              |
| Tbx5     | T-box 5                             | Maf     | similar to c-Maf long form; aviar  |
| Tcf21    | transcription factor 21             | Maff    | v-maf musculoaponeurotic fibro     |
| Tead3    | TEA domain family member 3          | Mef2a   | similar to Myocyte enhancer fac    |
| Thra     | thyroid hormone receptor alpha;     | Meis2   | Meis homeobox 2                    |
| Trps1    | trichorhinophalangeal syndrome      | Meox2   | mesenchyme homeobox 2              |
| Tshz2    | teashirt zinc finger family membe   | Mkx     | mohawk homeobox                    |
| Tshz3    | teashirt zinc finger family membe   | Neurod1 | neurogenic differentiation 1; ne   |
| Twist2   | twist homolog 2 (Drosophila)        | Neurog3 | neurogenin 3                       |
| Wt1      | similar to Wilms tumor homolog;     | Nfat5   | nuclear factor of activated T-cell |
| Zfhx4    | zinc finger homeodomain 4           | Nfatc1  | nuclear factor of activated T-cell |
| Zfp558   | zinc finger protein 558             | Nfatc3  | nuclear factor of activated T-cell |
| Zim1     | zinc finger, imprinted 1            | Nfatc4  | nuclear factor of activated T-cell |
| Znfng936 | RIKEN cDNA I1C0022H11 gene; si      | Nfe2l2  | nuclear factor, erythroid derive   |
|          |                                     | Nfia    | nuclear factor I/A                 |
|          |                                     | Nfib    | nuclear factor I/B                 |
|          |                                     | Nfic    | nuclear factor I/C                 |
|          |                                     | Nfix    | nuclear factor I/X                 |
|          |                                     | Nfkb1   | nuclear factor of kappa light pol  |
|          |                                     | Nkx2-3  | NK2 transcription factor related,  |
|          |                                     | Nkx6-1  | NK6 homeobox 1                     |
|          |                                     | Npas3   | neuronal PAS domain protein 3      |
|          |                                     | Nr1h4   | nuclear receptor subfamily 1, gr   |
|          |                                     | Nr2f1   | nuclear receptor subfamily 2, gr   |
|          |                                     | Nr2f2   | similar to COUP-TFI; nuclear rece  |
|          |                                     | Nr3c1   | nuclear receptor subfamily 3, gr   |
|          |                                     | Nr4a1   | nuclear receptor subfamily 4, gr   |
|          |                                     | Nr5a2   | nuclear receptor subfamily 5, gr   |
|          |                                     | Pbx1    | pre B-cell leukemia transcrip      |
|          |                                     | Per1    | period homolog 1 (Drosophila)      |
|          |                                     | Pitx1   | paired-like homeodomain trans      |
|          |                                     | Pitx2   | paired-like homeodomain trans      |
|          |                                     | Pknox2  | Pbx/knotted 1 homeobox 2           |
|          |                                     | Plagl1  | pleiomorphic adenoma gene-like     |
|          |                                     | Pparg   | peroxisome proliferator activate   |
|          |                                     | Preb    | prolactin regulatory element bin   |

|  |         |                                      |
|--|---------|--------------------------------------|
|  | Prrx1   | paired related homeobox 1            |
|  | Purb    | purine rich element binding protein  |
|  | Rbpj    | recombination signal binding protein |
|  | Rel     | reticuloendotheliosis oncogene       |
|  | Rest    | RE1-silencing transcription factor   |
|  | Rex2    | hypothetical protein LOC100048       |
|  | Rora    | RAR-related orphan receptor alpha    |
|  | Rorc    | RAR-related orphan receptor gamma    |
|  | Runx1   | runt related transcription factor    |
|  | Runx1t1 | runt-related transcription factor    |
|  | Runx3   | runt related transcription factor    |
|  | Rxra    | retinoid X receptor alpha; similar   |
|  | Sfpi1   | SFFV proviral integration 1          |
|  | Six2    | similar to Homeobox protein SIX3     |
|  | Six5    | sine oculis-related homeobox 5       |
|  | Smad3   | MAD homolog 3 (Drosophila)           |
|  | Smad7   | MAD homolog 7 (Drosophila)           |
|  | Sox18   | SRY-box containing gene 18           |
|  | Sox9    | SRY-box containing gene 9            |
|  | Sp1     | trans-acting transcription factor    |
|  | Spic    | Spi-C transcription factor (Spi-1/   |
|  | Srf     | serum response factor                |
|  | Stat1   | signal transducer and activator of   |
|  | Stat4   | signal transducer and activator of   |
|  | Stat6   | signal transducer and activator of   |
|  | Tcf21   | transcription factor 21              |
|  | Tcf3    | transcription factor E2a             |
|  | Tcf7    | transcription factor 7, T-cell spec  |
|  | Tead1   | TEA domain family member 1           |
|  | Tead3   | TEA domain family member 3           |
|  | Tgif1   | TGFB-induced factor homeobox         |
|  | Trp53   | transformation related protein 5     |
|  | Trps1   | trichorhinophalangeal syndrome       |
|  | Tshz2   | teashirt zinc finger family memb     |
|  | Twist1  | twist homolog 1 (Drosophila)         |
|  | Twist2  | twist homolog 2 (Drosophila)         |
|  | Wt1     | similar to Wilms tumor homolog       |
|  | Xbp1    | X-box binding protein 1              |
|  | Zbtb7b  | similar to Zinc finger and BTB do    |
|  | Zfp449  | zinc finger protein 449              |
|  | Zfp568  | zinc finger protein 568              |
|  | Zfp595  | zinc finger protein 595              |
|  | Zfp607  | zinc finger protein 607              |
|  | Zfp69   | zinc finger protein 69               |
|  | Zfp809  | zinc finger protein 809              |
|  | Zfp820  | hypothetical protein LOC100044       |

|                      |                                     |                      |                                     |
|----------------------|-------------------------------------|----------------------|-------------------------------------|
|                      |                                     | Zim1                 | zinc finger, imprinted 1            |
|                      |                                     |                      |                                     |
|                      |                                     |                      |                                     |
| <b>Ctrl11vsSox11</b> |                                     | <b>Ctrl15vsSox15</b> |                                     |
| <b>C11vsS11</b>      | <b>Fold Change &gt;1.3</b>          | <b>C15vsS15</b>      | <b>Fold Change &gt;1.3</b>          |
| 5730507C01           | RIKEN cDNA 5730507C01 gene; p       | Ahr                  | aryl-hydrocarbon receptor           |
| Barx1                | BarH-like homeobox 1                | Arap1                | ArfGAP with RhoGAP domain, ar       |
| Bhlhe41              | basic helix-loop-helix family, mem  | Atf3                 | activating transcription factor 3   |
| Creb3l2              | cAMP responsive element binding     | Atf7                 | activating transcription factor 7   |
| Cux2                 | cut-like homeobox 2                 | Barx1                | BarH-like homeobox 1                |
| Ebf1                 | early B-cell factor 1               | Bcl6b                | B-cell CLL/lymphoma 6, member       |
| Epas1                | endothelial PAS domain protein 1    | Bhlhe40              | basic helix-loop-helix family, me   |
| Erg                  | avian erythroblastosis virus E-26 ( | Bhlhe41              | basic helix-loop-helix family, me   |
| Esrrg                | estrogen-related receptor gamma     | Cdx2                 | caudal type homeo box 2             |
| Ets2                 | E26 avian leukemia oncogene 2, 3    | Cebpb                | CCAAT/enhancer binding protein      |
| Fli1                 | Friend leukemia integration 1       | Creb3l1              | cAMP responsive element bindin      |
| Foxc1                | forkhead box C1                     | Creb3l2              | cAMP responsive element bindin      |
| Foxc2                | forkhead box C2                     | Csrnp1               | cysteine-serine-rich nuclear prot   |
| Foxd1                | forkhead box D1                     | E2f8                 | E2F transcription factor 8          |
| Foxf1a               | forkhead box F1a                    | Ebf1                 | early B-cell factor 1               |
| Foxf2                | forkhead box F2                     | Elf1                 | E74-like factor 1                   |
| Foxp1                | forkhead box P1                     | Elk3                 | ELK3, member of ETS oncogene        |
| Foxp2                | forkhead box P2                     | Epas1                | endothelial PAS domain protein      |
| Foxp4                | forkhead box P4                     | Erg                  | avian erythroblastosis virus E-26   |
| Foxq1                | forkhead box Q1                     | Ets2                 | E26 avian leukemia oncogene 2,      |
| Gata1                | GATA binding protein 1              | Etv6                 | ets variant gene 6 (TEL oncogene    |
| Gata4                | GATA binding protein 4              | Fli1                 | Friend leukemia integration 1       |
| Gata5                | GATA binding protein 5              | Fosl2                | similar to fos-like antigen 2; fos- |
| Gata6                | GATA binding protein 6              | Foxa1                | forkhead box A1; similar to Hepa    |
| Gli1                 | GLI-Kruppel family member GLI1      | Foxa3                | forkhead box A3                     |
| Gli2                 | GLI-Kruppel family member GLI2      | Foxc2                | forkhead box C2                     |
| Gm98                 | predicted gene 98                   | Foxf1a               | forkhead box F1a                    |
| Hand1                | heart and neural crest derivatives  | Foxf2                | forkhead box F2                     |
| Hhex                 | hematopoietically expressed hom     | Foxp1                | forkhead box P1                     |
| Hif3a                | hypoxia inducible factor 3, alpha   | Foxp2                | forkhead box P2                     |
| Hlf                  | hepatic leukemia factor             | Foxp4                | forkhead box P4                     |
| Hlx                  | H2.0-like homeobox                  | Gata3                | GATA binding protein 3              |
| Hoxa11               | homeo box A11                       | Gata6                | GATA binding protein 6              |
| Hoxa4                | homeo box A4                        | Gli1                 | GLI-Kruppel family member GLI1      |
| Hoxa5                | homeo box A5                        | Gli2                 | GLI-Kruppel family member GLI2      |
| Hoxa6                | homeo box A6                        | Gm98                 | predicted gene 98                   |
| Hoxa7                | homeo box A7                        | Grhl2                | grainyhead-like 2 (Drosophila)      |
| Hoxa9                | homeo box A9                        | Hand1                | heart and neural crest derivative   |
| Hoxb6                | homeo box B6                        | Hhex                 | hematopoietically expressed hom     |
| Hoxb8                | homeo box B8                        | Hif3a                | hypoxia inducible factor 3, alpha   |
| Hoxc10               | homeo box C10                       | Hlx                  | H2.0-like homeobox                  |

|         |                                     |         |                                    |
|---------|-------------------------------------|---------|------------------------------------|
| Hoxc4   | homeo box C4                        | Hnf4g   | hepatocyte nuclear factor 4, gan   |
| Hoxc5   | homeo box C5                        | Hoxa11  | homeo box A11                      |
| Hoxc6   | homeo box C6                        | Hoxa9   | homeo box A9                       |
| Hoxc8   | homeo box C8                        | Hoxc10  | homeo box C10                      |
| Hoxc9   | homeo box C9                        | Hoxc6   | homeo box C6                       |
| Hoxd10  | homeo box D10                       | Hoxc8   | homeo box C8                       |
| Hoxd11  | homeo box D11                       | Hoxc9   | homeo box C9                       |
| Hoxd8   | homeo box D8                        | Hoxd10  | homeo box D10                      |
| Hoxd9   | homeo box D9                        | Hoxd11  | homeo box D11                      |
| Ikzf1   | IKAROS family zinc finger 1         | Hoxd8   | homeo box D8                       |
| Isl1    | ISL1 transcription factor, LIM/hor  | Hoxd9   | homeo box D9                       |
| Klf1    | Kruppel-like factor 1 (erythroid)   | Ikzf1   | IKAROS family zinc finger 1        |
| Klf12   | Kruppel-like factor 12              | Irf1    | interferon regulatory factor 1     |
| Klf2    | Kruppel-like factor 2 (lung)        | Isl1    | ISL1 transcription factor, LIM/hor |
| Lhx9    | LIM homeobox protein 9              | Isx     | intestine specific homeobox        |
| Maf     | similar to c-Maf long form; avian   | Jdp2    | Jun dimerization protein 2         |
| Mafb    | v-maf musculoaponeurotic fibros     | Klf12   | Kruppel-like factor 12             |
| Meis1   | Meis homeobox 1                     | Klf5    | Kruppel-like factor 5              |
| Meis2   | Meis homeobox 2                     | Maf     | similar to c-Maf long form; avian  |
| Meox1   | mesenchyme homeobox 1               | Mafb    | v-maf musculoaponeurotic fibro     |
| Meox2   | mesenchyme homeobox 2               | Maff    | v-maf musculoaponeurotic fibro     |
| Myb     | myeloblastosis oncogene             | Mef2a   | similar to Myocyte enhancer fac    |
| Nfatc4  | nuclear factor of activated T-cells | Meis1   | Meis homeobox 1                    |
| Nfe2    | nuclear factor, erythroid derived   | Meis2   | Meis homeobox 2                    |
| Nfia    | nuclear factor I/A                  | Meox2   | mesenchyme homeobox 2              |
| Nfib    | nuclear factor I/B                  | Mkx     | mohawk homeobox                    |
| Nfix    | nuclear factor I/X                  | Neurod1 | neurogenic differentiation 1; ne   |
| Nkx6-1  | NK6 homeobox 1                      | Neurog3 | neurogenin 3                       |
| Nr1h5   | nuclear receptor subfamily 1, gro   | Nfat5   | nuclear factor of activated T-cell |
| Nr2f1   | nuclear receptor subfamily 2, gro   | Nfatc4  | nuclear factor of activated T-cell |
| Nr2f2   | similar to COUP-TFI; nuclear rece   | Nfe2l2  | nuclear factor, erythroid derived  |
| Pbx1    | pre B-cell leukemia transcription   | Nfia    | nuclear factor I/A                 |
| Pbx3    | similar to PBX3a; pre B-cell leuker | Nfib    | nuclear factor I/B                 |
| Pitx2   | paired-like homeodomain transcr     | Nfic    | nuclear factor I/C                 |
| Plagl1  | pleiomorphic adenoma gene-like      | Nfix    | nuclear factor I/X                 |
| Prrx1   | paired related homeobox 1           | Nfkb1   | nuclear factor of kappa light pol  |
| Rhox6   | reproductive homeobox 6             | Nkx2-3  | NK2 transcription factor related,  |
| Runx1   | runt related transcription factor 1 | Nkx6-1  | NK6 homeobox 1                     |
| Runx1t1 | runt-related transcription factor 1 | Nr1h4   | nuclear receptor subfamily 1, gro  |
| Sfpi1   | SFFV proviral integration 1         | Nr2f1   | nuclear receptor subfamily 2, gro  |
| Six2    | similar to Homeobox protein SIX2    | Nr2f2   | similar to COUP-TFI; nuclear rece  |
| Smad5   | MAD homolog 5 (Drosophila)          | Nr3c1   | nuclear receptor subfamily 3, gro  |
| Smad7   | MAD homolog 7 (Drosophila)          | Nr4a1   | nuclear receptor subfamily 4, gro  |
| Tbx4    | T-box 4                             | Nr5a2   | nuclear receptor subfamily 5, gro  |
| Tbx5    | T-box 5                             | Pbx1    | pre B-cell leukemia transcription  |
| Tcf21   | transcription factor 21             | Per1    | period homolog 1 (Drosophila)      |



|        |                                   |         |                                     |
|--------|-----------------------------------|---------|-------------------------------------|
| Tead3  | TEA domain family member 3        | Pitx1   | paired-like homeodomain transcrip   |
| Tfdp2  | transcription factor Dp 2         | Pitx2   | paired-like homeodomain transcrip   |
| Trps1  | trichorhinophalangeal syndrome    | Plagl1  | pleiomorphic adenoma gene-like      |
| Tshz2  | teashirt zinc finger family membe | Pparg   | peroxisome proliferator activate    |
| Tshz3  | teashirt zinc finger family membe | Prrx1   | paired related homeobox 1           |
| Twist1 | twist homolog 1 (Drosophila)      | Purb    | purine rich element binding prot    |
| Twist2 | twist homolog 2 (Drosophila)      | Rel     | reticuloendotheliosis oncogene      |
| Wt1    | similar to Wilms tumor homolog;   | Rest    | RE1-silencing transcription facto   |
| Zfhx3  | zinc finger homeobox 3            | Rora    | RAR-related orphan receptor alp     |
| Zfhx4  | zinc finger homeodomain 4         | Rorc    | RAR-related orphan receptor ga      |
| Zfp57  | zinc finger protein 57            | Rsl1    | regulator of sex limited protein    |
| Zfp936 | RIKEN cDNA I1C0022H11 gene; si    | Runx1   | runt related transcription factor   |
| Zim1   | zinc finger, imprinted 1          | Runx1t1 | runt-related transcription factor   |
|        |                                   | Runx3   | runt related transcription factor   |
|        |                                   | Sfpi1   | SFFV proviral integration 1         |
|        |                                   | Six2    | similar to Homeobox protein SIX     |
|        |                                   | Smad7   | MAD homolog 7 (Drosophila)          |
|        |                                   | Sox18   | SRY-box containing gene 18          |
|        |                                   | Sp1     | trans-acting transcription factor   |
|        |                                   | Spic    | Spi-C transcription factor (Spi-1/  |
|        |                                   | Srf     | serum response factor               |
|        |                                   | Stat1   | signal transducer and activator c   |
|        |                                   | Stat4   | signal transducer and activator c   |
|        |                                   | Stat5b  | signal transducer and activator c   |
|        |                                   | Stat6   | signal transducer and activator c   |
|        |                                   | Tbx5    | T-box 5                             |
|        |                                   | Tcf21   | transcription factor 21             |
|        |                                   | Tcf3    | transcription factor E2a            |
|        |                                   | Tcf7    | transcription factor 7, T-cell spec |
|        |                                   | Tead1   | TEA domain family member 1          |
|        |                                   | Tead3   | TEA domain family member 3          |
|        |                                   | Thra    | thyroid hormone receptor alpha      |
|        |                                   | Trps1   | trichorhinophalangeal syndrome      |
|        |                                   | Tshz2   | teashirt zinc finger family membe   |
|        |                                   | Twist1  | twist homolog 1 (Drosophila)        |
|        |                                   | Twist2  | twist homolog 2 (Drosophila)        |
|        |                                   | Wt1     | similar to Wilms tumor homolog      |
|        |                                   | Xbp1    | X-box binding protein 1             |
|        |                                   | Zbtb7b  | similar to Zinc finger and BTB do   |
|        |                                   | Zfp449  | zinc finger protein 449             |
|        |                                   | Zfp52   | hypothetical protein LOC100044      |
|        |                                   | Zfp568  | zinc finger protein 568             |
|        |                                   | Zfp595  | zinc finger protein 595             |
|        |                                   | Zfp607  | zinc finger proten 607              |
|        |                                   | Zfp809  | zinc finger protein 809             |
|        |                                   | Zfp9    | zinc finger protein 9               |



|  |  |      |                          |
|--|--|------|--------------------------|
|  |  | Zim1 | zinc finger, imprinted 1 |
|--|--|------|--------------------------|
