# Supplementary material for: Transcription and Signaling Regulators in Developing Neuronal Subtypes of Mouse and Human Enteric Nervous System
Source: PubMed Central journal article supplement (PMC6381388; doi:10.1053/j.gastro.2017.10.005), 2018-02
Supplement: mmc14.pdf [file mmc14.pdf]

| <b>Supplementary Table 4: Signaling ligands enriched (&gt;1.2) in pairwise comparisons between cell populations in the developing gut.</b>                                                                    |                                  |                         |                                   |
|---------------------------------------------------------------------------------------------------------------------------------------------------------------------------------------------------------------|----------------------------------|-------------------------|-----------------------------------|
| Signaling factors were identified from the terms <i>growth factor</i> (Panther MF00019) and <i>secreted</i> (SP_PIR_KEYWORDS). Semaphorins and Slit proteins were identified manually and added to the lists. |                                  |                         |                                   |
| <b>SoxE11 vs WntE11</b>                                                                                                                                                                                       |                                  | <b>SoxE11 vs SoxE15</b> |                                   |
| <b>S11vsW11</b>                                                                                                                                                                                               | <b>Fold Change &gt;1.2</b>       | <b>S11vsS15</b>         | <b>Fold Change &gt;1.2</b>        |
| Sema3c                                                                                                                                                                                                        | semaphorin 3C                    | D17Wsu104               | DNA segment, Chr 17, Wayne St     |
|                                                                                                                                                                                                               |                                  | Efnb2                   | ephrin B2                         |
|                                                                                                                                                                                                               |                                  | Gdf10                   | growth differentiation factor 10  |
|                                                                                                                                                                                                               |                                  | Igf1                    | insulin-like growth factor 1      |
|                                                                                                                                                                                                               |                                  | Mdk                     | midkine                           |
|                                                                                                                                                                                                               |                                  | Mstn                    | myostatin                         |
|                                                                                                                                                                                                               |                                  | Pdgfc                   | platelet-derived growth factor, ( |
|                                                                                                                                                                                                               |                                  | Sema3d                  | semaphorin 3D                     |
| <b>WntE11 vs SoxE11</b>                                                                                                                                                                                       |                                  | <b>WntE11 vs WntE15</b> |                                   |
| <b>W11vsS11</b>                                                                                                                                                                                               | <b>Fold Change &gt;1.2</b>       | <b>W11vsW15</b>         | <b>Fold Change &gt;1.2</b>        |
| Gdf10                                                                                                                                                                                                         | growth differentiation factor 10 | Bmp1                    | bone morphogenetic protein 1      |
|                                                                                                                                                                                                               |                                  | Cxcl12                  | chemokine (C-X-C motif) ligand    |
|                                                                                                                                                                                                               |                                  | Dll3                    | delta-like 3 (Drosophila)         |
|                                                                                                                                                                                                               |                                  | Efna4                   | ephrin A4                         |
|                                                                                                                                                                                                               |                                  | Efnb2                   | ephrin B2                         |
|                                                                                                                                                                                                               |                                  | Gdf10                   | growth differentiation factor 10  |
|                                                                                                                                                                                                               |                                  | Gdf11                   | growth differentiation factor 11  |
|                                                                                                                                                                                                               |                                  | Igf1                    | insulin-like growth factor 1      |
|                                                                                                                                                                                                               |                                  | Jag1                    | jagged 1                          |
|                                                                                                                                                                                                               |                                  | Mdk                     | midkine                           |
|                                                                                                                                                                                                               |                                  | Mia1                    | melanoma inhibitory activity 1    |
|                                                                                                                                                                                                               |                                  | Mstn                    | myostatin                         |
|                                                                                                                                                                                                               |                                  | Pdgfc                   | platelet-derived growth factor, ( |
|                                                                                                                                                                                                               |                                  | Sema3d                  | semaphorin 3D                     |
|                                                                                                                                                                                                               |                                  | Wnt2b                   | wingless related MMTV integrat    |
|                                                                                                                                                                                                               |                                  | Wnt5a                   | wingless-related MMTV integrat    |
| <b>SoxE15 vs WntE15</b>                                                                                                                                                                                       |                                  | <b>SoxE15 vs SoxE11</b> |                                   |
| <b>S15vsW15</b>                                                                                                                                                                                               | <b>Fold Change &gt;1.2</b>       | <b>S15vsS11</b>         | <b>Fold Change &gt;1.2</b>        |
| Ctgf                                                                                                                                                                                                          | connective tissue growth factor  | Ctgf                    | connective tissue growth factor   |
| Dll3                                                                                                                                                                                                          | delta-like 3 (Drosophila)        | Efna5                   | ephrin A5                         |
| Fgf7                                                                                                                                                                                                          | fibroblast growth factor 7       | Fgf7                    | fibroblast growth factor 7        |
| Jag1                                                                                                                                                                                                          | jagged 1                         | Fgf12                   | fibroblast growth factor 12       |
| Mdk                                                                                                                                                                                                           | midkine                          | Fgf13                   | fibroblast growth factor 13       |
| Tgfb2                                                                                                                                                                                                         | transforming growth factor, beta | Fgf14                   | fibroblast growth factor 14       |
|                                                                                                                                                                                                               |                                  | Fgf2                    | fibroblast growth factor 2        |

|                         |                            |                         |                                                 |
|-------------------------|----------------------------|-------------------------|-------------------------------------------------|
|                         |                            | Hdgfrp3                 | hepatoma-derived growth factor                  |
|                         |                            | Inha                    | inhibin alpha                                   |
|                         |                            | Nrg1                    | neuregulin 1                                    |
|                         |                            | Nrg3                    | neuregulin 3                                    |
|                         |                            | Ntng1                   | netrin G1                                       |
|                         |                            | Ogn                     | osteoglycin                                     |
|                         |                            | Pdgfa                   | platelet derived growth factor, alpha           |
|                         |                            | Pdgfb                   | similar to platelet-derived growth factor, beta |
|                         |                            | Pdgfd                   | platelet-derived growth factor, delta           |
|                         |                            | Pgf                     | placental growth factor                         |
|                         |                            | Ptn                     | pleiotrophin                                    |
|                         |                            | Sema3c                  | semaphorin 3C                                   |
|                         |                            | Sema3e                  | semaphorin 3E                                   |
|                         |                            | Sema4d                  | semaphorin 4D                                   |
|                         |                            | Sema4g                  | semaphorin 4G                                   |
|                         |                            | Sema6a                  | semaphorin 6A                                   |
|                         |                            | Sema6d                  | semaphorin 6D                                   |
|                         |                            | Slit1                   | slit homolog 1                                  |
|                         |                            | Slit2                   | slit homolog 2                                  |
|                         |                            | Tgfb2                   | transforming growth factor, beta 2              |
|                         |                            |                         |                                                 |
| <b>WntE15 vs SoxE15</b> |                            | <b>WntE15 vs WntE11</b> |                                                 |
| <b>W15vsS15</b>         | <b>Fold Change &gt;1.2</b> | <b>W15vsW11</b>         | <b>Fold Change &gt;1.2</b>                      |
| Efnb3                   | ephrin B3                  | Ctgf                    | connective tissue growth factor                 |
| Nrg1                    | neuregulin 1               | Efna5                   | ephrin A5                                       |
| Nrg3                    | neuregulin 3               | Efnb3                   | ephrin B3                                       |
| Ntng1                   | netrin G1                  | Fgf1                    | fibroblast growth factor 1                      |
| Sema3d                  | Semaphorin 3D              | Fgf11                   | fibroblast growth factor 11                     |
| Sema4g                  | Semaphorin 4G              | Fgf12                   | fibroblast growth factor 12                     |
| Sema6a                  | Semaphorin 6A              | Fgf13                   | fibroblast growth factor 13                     |
| Sema6d                  | Semaphorin 6D              | Fgf14                   | fibroblast growth factor 14                     |
| Slit2                   | Slit homolog 2             | Fgf9                    | fibroblast growth factor 9                      |
|                         |                            | Gdf5                    | growth differentiation factor 5                 |
|                         |                            | Hdgfrp3                 | hepatoma-derived growth factor                  |
|                         |                            | Inha                    | inhibin alpha                                   |
|                         |                            | Nrg1                    | neuregulin 1                                    |
|                         |                            | Nrg3                    | neuregulin 3                                    |
|                         |                            | Ntng1                   | netrin G1                                       |
|                         |                            | Pdgfa                   | platelet derived growth factor, alpha           |
|                         |                            | Ptn                     | pleiotrophin                                    |
|                         |                            | Sema3c                  | semaphorin 3C                                   |
|                         |                            | Sema3e                  | semaphorin 3E                                   |
|                         |                            | Sema4d                  | semaphorin 4D                                   |
|                         |                            | Sema4f                  | semaphorin 4F                                   |
|                         |                            | Sema4g                  | semaphorin 4G                                   |
|                         |                            | Sema6a                  | semaphorin 6A                                   |

|                          |                                  |                          |                                  |
|--------------------------|----------------------------------|--------------------------|----------------------------------|
|                          |                                  | Sema6d                   | semaphorin 6D                    |
|                          |                                  | Slit1                    | slit homolog 1                   |
|                          |                                  | Slit2                    | slit homolog 2                   |
|                          |                                  |                          |                                  |
| <b>SoxE11 vs CtrlE11</b> |                                  | <b>SoxE15 vs CtrlE15</b> |                                  |
| <b>S11vsC11</b>          | <b>Fold Change &gt;1.2</b>       | <b>S15vsC15</b>          | <b>Fold Change &gt;1.2</b>       |
| Bmp7                     | bone morphogenetic protein 7     | Bmp15                    | bone morphogenetic protein 15    |
| Dll1                     | delta-like 1                     | Bmp7                     | bone morphogenetic protein 7     |
| Dll3                     | delta-like 3                     | Ctgf                     | connective tissue growth factor  |
| Fgf13                    | fibroblast growth factor 13      | Dhh                      | desert hedgehog                  |
| Fgf7                     | fibroblast growth factor 7       | Dll1                     | delta-like 1 (Drosophila)        |
| Gpi1                     | glucose phosphate isomerase 1    | Dll3                     | delta-like 3 (Drosophila)        |
| Nrg3                     | neuregulin 3                     | Fgf12                    | fibroblast growth factor 12      |
| Rabep1                   | rabaptin, RAB GTPase binding eff | Fgf13                    | fibroblast growth factor 13      |
| Sema3b                   | semaphorin 3B                    | Gdf3                     | growth differentiation factor 3  |
| Sema3c                   | semaphorin 3C                    | Gpi1                     | glucose phosphate isomerase 1    |
| Sema3d                   | semaphorin 3D                    | Nrg3                     | neuregulin 3                     |
| Sema4d                   | semaphorin 4D                    | Ntn4                     | netrin 4                         |
| Slit3                    | slit homolog 3                   | Ntng1                    | netrin G1                        |
| Tgfb2                    | transforming growth factor, beta | Pdgfb                    | similar to platelet-derived grow |
|                          |                                  | Rabep1                   | rabaptin, RAB GTPase binding e   |
|                          |                                  | Sema3b                   | semaphorin 3B                    |
|                          |                                  | Sema3c                   | semaphorin 3C                    |
|                          |                                  | Sema4d                   | semaphorin 4D                    |
|                          |                                  | Sema4f                   | semaphorin 4F                    |
|                          |                                  | Slit1                    | slit homolog 1                   |
|                          |                                  | Slit3                    | slit homolog 2                   |
|                          |                                  | Tgfb2                    | transforming growth factor, bet  |
|                          |                                  |                          |                                  |
| <b>WntE11 vs CtrlE11</b> |                                  | <b>WntE15 vs CtrlE15</b> |                                  |
| <b>W11vsC11</b>          | <b>Fold Change &gt;1.2</b>       | <b>W15vsC15</b>          | <b>Fold Change &gt;1.2</b>       |
| Bmp7                     | bone morphogenetic protein 7     | Bmp7                     | bone morphogenetic protein 7     |
| Dll1                     | delta-like 1 (Drosophila)        | Dll1                     | delta-like 1 (Drosophila)        |
| Dll3                     | delta-like 3 (Drosophila)        | Dll3                     | delta-like 3 (Drosophila)        |
| Fgf13                    | fibroblast growth factor 13      | Efnab3                   | ephrin B3                        |
| Fgf7                     | fibroblast growth factor 7       | Efnb3                    | ephrin B3                        |
| Gdf10                    | growth differentiation factor 10 | Fgf13                    | fibroblast growth factor 13      |
| Gpi1                     | glucose phosphate isomerase 1    | Fgf14                    | fibroblast growth factor 14      |
| Mstn                     | myostatin                        | Gpi1                     | glucose phosphate isomerase 1    |
| Sema3b                   | semaphorin 3B                    | Hdgrp3                   | hepatoma-derived growth facto    |
| Sema3d                   | semaphorin 3D                    | Inha                     | inhibin alpha                    |
| Slit3                    | slit homolog 3                   | Jag1                     | jagged 1                         |
| Tgfb2                    | transforming growth factor, beta | Jag2                     | jagged 2                         |
|                          |                                  | Nrg1                     | neuregulin 1                     |
|                          |                                  | Nrg3                     | neuregulin 3                     |
|                          |                                  | Ntn4                     | netrin 4                         |

|                          |                                             |                          |                                                 |
|--------------------------|---------------------------------------------|--------------------------|-------------------------------------------------|
|                          |                                             | Ntng1                    | netrin G1                                       |
|                          |                                             | Pdgfb                    | similar to platelet-derived growth factor, beta |
|                          |                                             | Rabep1                   | rabaptin, RAB GTPase binding protein            |
|                          |                                             | Sema3b                   | semaphorin 3B                                   |
|                          |                                             | Sema3c                   | semaphorin 3C                                   |
|                          |                                             | Sema4d                   | semaphorin 4D                                   |
|                          |                                             | Sema4f                   | semaphorin 4F                                   |
|                          |                                             | Sema4g                   | semaphorin 4G                                   |
|                          |                                             | Slit1                    | slit homolog 1                                  |
|                          |                                             | Slit3                    | slit homolog 3                                  |
|                          |                                             | Tgfb2                    | transforming growth factor, beta                |
|                          |                                             |                          |                                                 |
| <b>CtrlE11 vs WntE11</b> |                                             | <b>CtrlE15 vs WntE15</b> |                                                 |
| <b>C11vsW11</b>          | <b>Column2</b>                              | <b>C15vsW15</b>          | <b>Column2</b>                                  |
| Amelx                    | amelogenin X chromosome                     | Amelx                    | amelogenin X chromosome                         |
| Bmp4                     | bone morphogenetic protein 4                | Bmp1                     | bone morphogenetic protein 1                    |
| Bmp5                     | bone morphogenetic protein 5                | Bmp2                     | bone morphogenetic protein 2                    |
| Csf1                     | colony stimulating factor 1 (macrophage)    | Bmp4                     | bone morphogenetic protein 4                    |
| Cxcl12                   | chemokine (C-X-C motif) ligand 1            | Bmp5                     | bone morphogenetic protein 5                    |
| Edn1                     | endothelin 1                                | Bmp6                     | bone morphogenetic protein 6                    |
| Edn3                     | endothelin 3                                | Clec11a                  | C-type lectin domain family 11, member 1        |
| Efnb2                    | ephrin B2                                   | Csf1                     | colony stimulating factor 1 (macrophage)        |
| Fgf10                    | fibroblast growth factor 10                 | Cxcl12                   | chemokine (C-X-C motif) ligand 1                |
| Fgf9                     | fibroblast growth factor 9                  | Edn3                     | endothelin 3                                    |
| Gdf6                     | growth differentiation factor 6             | Efna1                    | ephrin A1                                       |
| Gdnf                     | glial cell line derived neurotrophic factor | Efnb1                    | ephrin B1                                       |
| Gmfg                     | similar to Chain A, Crystal Structure       | Fgf10                    | fibroblast growth factor 10                     |
| Hdgf                     | hepatoma-derived growth factor              | Fgf18                    | fibroblast growth factor 18                     |
| Hdgfrp3                  | hepatoma-derived growth factor              | Fgf2                     | fibroblast growth factor 2                      |
| Hgf                      | hepatocyte growth factor                    | Fgf7                     | fibroblast growth factor 7                      |
| Igf1                     | insulin-like growth factor 1                | Fgf9                     | fibroblast growth factor 9                      |
| Igf2                     | insulin-like growth factor 2                | Figf                     | c-fos induced growth factor                     |
| Inhba                    | inhibin beta-A                              | Gdf10                    | growth differentiation factor 10                |
| Kitl                     | kit ligand                                  | Gdf6                     | growth differentiation factor 6                 |
| Mdk                      | midkine                                     | Gdnf                     | glial cell line derived neurotrophic factor     |
| Nrg1                     | neuregulin 1                                | Gmfg                     | similar to Chain A, Crystal Structure           |
| Ntf3                     | neurotrophin 3                              | Hdgf                     | hepatoma-derived growth factor                  |
| Ntng1                    | netrin G1                                   | Hgf                      | hepatocyte growth factor                        |
| Pdgfc                    | platelet-derived growth factor, C           | Igf1                     | insulin-like growth factor 1                    |
| Pdgfd                    | platelet-derived growth factor, D           | Igf2                     | insulin-like growth factor 2                    |
| Pgf                      | placental growth factor                     | Il1b                     | interleukin 1 beta                              |
| Ptn                      | pleiotrophin                                | Il6                      | interleukin 6                                   |
| Sema3a                   | semaphorin 3A                               | Inhba                    | inhibin beta-A                                  |
| Sema3f                   | semaphorin 3F                               | Jag1                     | jagged 1                                        |
| Sema5a                   | semaphorin 5A                               | Kitl                     | kit ligand                                      |
| Sema6a                   | semaphorin 6A                               | Mdk                      | midkine                                         |

|        |                                    |        |                                      |
|--------|------------------------------------|--------|--------------------------------------|
| Sema6d | semaphorin 6D                      | Ngf    | nerve growth factor                  |
| Slit2  | slit homolog 2                     | Ntf3   | neurotrophin 3                       |
| Tgfb1  | transforming growth factor, beta   | Ntf5   | neurotrophin 5                       |
| Tgfb3  | transforming growth factor, beta   | Ogn    | osteoglycin                          |
| Vegfc  | vascular endothelial growth factor | Pdgfc  | platelet-derived growth factor, beta |
| Wnt11  | wingless-related MMTV integrator   | Pgf    | placental growth factor              |
| Wnt2b  | wingless related MMTV integrator   | Ptn    | pleiotrophin                         |
| Wnt4   | wingless-related MMTV integrator   | Sema3a | semaphorin 3A                        |
| Wnt5a  | wingless-related MMTV integrator   | Sema3e | semaphorin 3E                        |
| Wnt5b  | wingless-related MMTV integrator   | Sema3f | semaphorin 3F                        |
|        |                                    | Sema5a | semaphorin 5A                        |
|        |                                    | Sema5b | semaphorin 5B                        |
|        |                                    | Sema6d | semaphorin 6D                        |
|        |                                    | Tgfb1  | transforming growth factor, beta     |
|        |                                    | Tgfb3  | transforming growth factor, beta     |
|        |                                    | Vegfc  | vascular endothelial growth factor   |
|        |                                    | Wnt2b  | wingless related MMTV integrator     |
|        |                                    | Wnt4   | wingless-related MMTV integrator     |
|        |                                    | Wnt5a  | wingless-related MMTV integrator     |
|        |                                    | Wnt5b  | wingless-related MMTV integrator     |
