# Supplementary material for: Transcription and Signaling Regulators in Developing Neuronal Subtypes of Mouse and Human Enteric Nervous System
Source: PubMed Central journal article supplement (PMC6381388; doi:10.1053/j.gastro.2017.10.005), 2018-02
Supplement: mmc15.pdf [file mmc15.pdf]

**Supplementary Table 5: Signaling Receptors enriched (>1.2) in pairwise comparisons between cell populations in the developing gut.**

Receptors were identified from the annotation terms *receptor* (SP\_PIR\_KEYWORDS) and *receptor activity* (GO:0004872). The combined lists of genes were manually screened to remove wrongly annotated genes.

| <b>SoxE11 vs WntE11</b> |                                   | <b>SoxE11 vs SoxE15</b> |                                                                      |
|-------------------------|-----------------------------------|-------------------------|----------------------------------------------------------------------|
| <b>S11vsW11</b>         | <b>Fold Change &gt;1.2</b>        | <b>S11vsS15</b>         | <b>Fold Change &gt;1.2</b>                                           |
| Eda2r                   | ectodysplasin A2 isoform receptor | Antxr1                  | anthrax toxin receptor 1                                             |
|                         |                                   | Ednra                   | endothelin receptor type A                                           |
|                         |                                   | Epha3                   | Eph receptor A3                                                      |
|                         |                                   | Fkbp4                   | FK506 binding protein 4                                              |
|                         |                                   | Fzd7                    | frizzled homolog 7 (Drosophila)                                      |
|                         |                                   | Gabra3                  | gamma-aminobutyric acid (GABA) receptor subunit 3                    |
|                         |                                   | Ghr                     | growth hormone receptor                                              |
|                         |                                   | Gpr50                   | G-protein-coupled receptor 50                                        |
|                         |                                   | Gprc5c                  | G protein-coupled receptor, family C, class 5, member C              |
|                         |                                   | Grb10                   | growth factor receptor bound protein 10                              |
|                         |                                   | Hmmr                    | hyaluronan mediated motility receptor                                |
|                         |                                   | Hyal2                   | hyaluronoglucosaminidase 2                                           |
|                         |                                   | Itga4                   | integrin alpha 4                                                     |
|                         |                                   | Itga8                   | integrin alpha 8                                                     |
|                         |                                   | Itga9                   | integrin alpha 9                                                     |
|                         |                                   | Itpr1                   | inositol 1,4,5-triphosphate receptor 1                               |
|                         |                                   | Jmjd6                   | jumonji domain containing 6                                          |
|                         |                                   | Lbr                     | lamin B receptor                                                     |
|                         |                                   | Ly75                    | lymphocyte antigen 75                                                |
|                         |                                   | Notch3                  | Notch gene homolog 3 (Drosophila)                                    |
|                         |                                   | Npr3                    | natriuretic peptide receptor 3                                       |
|                         |                                   | Nr1h5                   | nuclear receptor subfamily 1, group 5, member 5                      |
|                         |                                   | Nr2f1                   | nuclear receptor subfamily 2, group 1, member 1                      |
|                         |                                   | Nr2f2                   | similar to COUP-TFI; nuclear receptor subfamily 2, group 2, member 2 |
|                         |                                   | Nrip1                   | nuclear receptor interacting protein 1                               |
|                         |                                   | Nrp1                    | neuropilin 1                                                         |
|                         |                                   | Olfir543                | olfactory receptor 543                                               |
|                         |                                   | Opn3                    | opsin 3                                                              |
|                         |                                   | Pdgfra                  | platelet derived growth factor receptor alpha                        |
|                         |                                   | Phb2                    | prohibitin 2                                                         |
|                         |                                   | Plxna4                  | plexin A4                                                            |
|                         |                                   | Ptch1                   | patched homolog 1                                                    |
|                         |                                   | Ptpn1                   | protein tyrosine phosphatase, non-receptor type 1                    |
|                         |                                   | Ptprk                   | protein tyrosine phosphatase, non-receptor type 11                   |
|                         |                                   | Ret                     | ret proto-oncogene                                                   |
|                         |                                   | Robo1                   | roundabout homolog 1 (Drosophila)                                    |
|                         |                                   | Rtn4r1l                 | reticulon 4 receptor-like 1                                          |

|                         |                                       |                         |                                   |
|-------------------------|---------------------------------------|-------------------------|-----------------------------------|
|                         |                                       | Scarb1                  | scavenger receptor class B, me    |
|                         |                                       | Sigmar1                 | sigma non-opioid intracellular    |
|                         |                                       | Tas2r137                | taste receptor, type 2, membe     |
|                         |                                       | Tfrc                    | transferrin receptor              |
|                         |                                       | Tomm22                  | predicted gene 12906; predicte    |
|                         |                                       | Traf4                   | TNF receptor associated factor    |
|                         |                                       | Trip13                  | thyroid hormone receptor inte     |
|                         |                                       | Unc5c                   | unc-5 homolog C (C. elegans)      |
|                         |                                       |                         |                                   |
| <b>WntE11 vs SoxE11</b> |                                       | <b>WntE11 vs WntE15</b> |                                   |
| <b>W11vsS11</b>         | <b>Fold Change &gt;1.2</b>            | <b>W11vsW15</b>         | <b>Fold Change &gt;1.2</b>        |
| Epha3                   | Eph receptor A3                       | Antxr1                  | anthrax toxin receptor 1          |
| Gabra3                  | gamma-aminobutyric acid (GABA) A r    | Bai1                    | brain-specific angiogenesis inh   |
| Npr3                    | natriuretic peptide receptor 3        | Cd200r2                 | Cd200 receptor 2; CD200 recep     |
| Nr2f1                   | nuclear receptor subfamily 2, group F | Celsr1                  | cadherin, EGF LAG seven-pass      |
| Slitrk2                 | SLIT and NTRK-like family, member 2   | Edaradd                 | EDAR (ectodysplasin-A recepto     |
|                         |                                       | Ednra                   | endothelin receptor type A        |
|                         |                                       | Epha3                   | Eph receptor A3                   |
|                         |                                       | Ephb4                   | Eph receptor B4                   |
|                         |                                       | ErbB2                   | v-erb-b2 erythroblastic leukem    |
|                         |                                       | ErbB3                   | v-erb-b2 erythroblastic leukem    |
|                         |                                       | F2r                     | coagulation factor II (thrombin   |
|                         |                                       | Fkbp4                   | FK506 binding protein 4           |
|                         |                                       | Fzd2                    | frizzled homolog 2 (Drosophila    |
|                         |                                       | Fzd7                    | frizzled homolog 7 (Drosophila    |
|                         |                                       | Gabra3                  | gamma-aminobutyric acid (GA       |
|                         |                                       | Gabra4                  | gamma-aminobutyric acid (GA       |
|                         |                                       | Gfra3                   | glial cell line derived neurotrop |
|                         |                                       | Git1                    | G protein-coupled receptor kir    |
|                         |                                       | Gpr124                  | G protein-coupled receptor 12     |
|                         |                                       | Gpr125                  | G protein-coupled receptor 12     |
|                         |                                       | Gpr4                    | G protein-coupled receptor 4      |
|                         |                                       | Gprc5b                  | G protein-coupled receptor, fa    |
|                         |                                       | Gprc5c                  | G protein-coupled receptor, fa    |
|                         |                                       | Grb10                   | growth factor receptor bound      |
|                         |                                       | Grk6                    | G protein-coupled receptor kir    |
|                         |                                       | Hmmr                    | hyaluronan mediated motility      |
|                         |                                       | Hyal2                   | hyaluronoglucosaminidase 2        |
|                         |                                       | Ifnar2                  | interferon (alpha and beta) rec   |
|                         |                                       | Ifngr1                  | interferon gamma receptor 1       |
|                         |                                       | Igf2r                   | insulin-like growth factor 2 rec  |
|                         |                                       | Il1rap                  | interleukin 1 receptor accesso    |
|                         |                                       | Il1rl2                  | interleukin 1 receptor-like 2     |
|                         |                                       | Itga4                   | integrin alpha 4                  |
|                         |                                       | Itga5                   | integrin alpha 5 (fibronectin re  |
|                         |                                       | Itga6                   | integrin alpha 6                  |

|  |  |          |                                                                      |
|--|--|----------|----------------------------------------------------------------------|
|  |  | Itga9    | integrin alpha 9                                                     |
|  |  | Itgav    | integrin alpha V                                                     |
|  |  | Itgb5    | integrin beta 5                                                      |
|  |  | Itpr1    | inositol 1,4,5-triphosphate receptor                                 |
|  |  | Jmjd6    | jumonji domain containing 6                                          |
|  |  | Klra5    | killer cell lectin-like receptor, subfamily A, member 5              |
|  |  | Lbr      | lamin B receptor                                                     |
|  |  | Lpar3    | lysophosphatidic acid receptor 3                                     |
|  |  | Lphn2    | latrophilin 2                                                        |
|  |  | Lrp4     | low density lipoprotein receptor-related protein 4                   |
|  |  | Lrp5     | low density lipoprotein receptor-related protein 5                   |
|  |  | Ly75     | lymphocyte antigen 75                                                |
|  |  | M6pr     | mannose-6-phosphate receptor 1                                       |
|  |  | Mertk    | c-met proto-oncogene tyrosine kinase                                 |
|  |  | Mrgprb2  | MAS-related GPR, member B2                                           |
|  |  | Notch2   | Notch gene homolog 2 (Drosophila)                                    |
|  |  | Notch3   | Notch gene homolog 3 (Drosophila)                                    |
|  |  | Npr3     | natriuretic peptide receptor 3                                       |
|  |  | Nr2f1    | nuclear receptor subfamily 2, group 1, member 1                      |
|  |  | Nr2f2    | similar to COUP-TFI; nuclear receptor subfamily 2, group 2, member 2 |
|  |  | Nr2f6    | nuclear receptor subfamily 2, group 2, member 6                      |
|  |  | Nrip1    | nuclear receptor interacting protein 1                               |
|  |  | Nrp1     | neuropilin 1                                                         |
|  |  | Ogfr     | opioid growth factor receptor                                        |
|  |  | Olfr1134 | olfactory receptor 1134                                              |
|  |  | Olfr121  | olfactory receptor 121                                               |
|  |  | Olfr908  | olfactory receptor 908                                               |
|  |  | Opn3     | opsin 3                                                              |
|  |  | Pdgfra   | platelet derived growth factor receptor alpha                        |
|  |  | Phb2     | prohibitin 2                                                         |
|  |  | Plaur    | plasminogen activator, urokinase-type                                |
|  |  | Plxna1   | plexin A1                                                            |
|  |  | Ptch1    | patched homolog 1                                                    |
|  |  | Ptk7     | PTK7 protein tyrosine kinase 7                                       |
|  |  | Ptpn1    | protein tyrosine phosphatase, non-receptor type 1                    |
|  |  | Ptprk    | protein tyrosine phosphatase, non-receptor type 11                   |
|  |  | Rara     | retinoic acid receptor, alpha                                        |
|  |  | Ret      | ret proto-oncogene                                                   |
|  |  | Rhbdf1   | rhomboid family 1 (Drosophila)                                       |
|  |  | Rnf135   | ring finger protein 135                                              |
|  |  | Robo1    | roundabout homolog 1 (Drosophila)                                    |
|  |  | Rpsa     |                                                                      |
|  |  | Rpsa     |                                                                      |
|  |  | Rtn4rl1  | reticulon 4 receptor-like 1                                          |
|  |  | Rxra     | retinoid X receptor alpha; similar to RXR                            |
|  |  | Rxrg     | retinoid X receptor gamma                                            |

|  |  |          |                                  |
|--|--|----------|----------------------------------|
|  |  | Ryk      | receptor-like tyrosine kinase    |
|  |  | Scarb1   | scavenger receptor class B, me   |
|  |  | Sigmar1  | sigma non-opioid intracellular   |
|  |  | Slc20a2  | hypothetical protein LOC10004    |
|  |  | Slitrk2  | SLIT and NTRK-like family, me    |
|  |  | Smo      | predicted gene 4066; smoothe     |
|  |  | Sra1     | steroid receptor RNA activator   |
|  |  | Srprb    | signal recognition particle rece |
|  |  | Strap    | serine/threonine kinase recept   |
|  |  | Tmem123  | transmembrane protein 123        |
|  |  | Tnfrsf19 | tumor necrosis factor receptor   |
|  |  | Tomm22   | predicted gene 12906; predicte   |
|  |  | Traf4    | TNF receptor associated factor   |
|  |  | Traf6    | TNF receptor-associated factor   |
|  |  | Trip13   | thyroid hormone receptor inte    |
|  |  | Trip6    | thyroid hormone receptor inte    |

| <b>SoxE15 vs WntE15</b> |                                          | <b>SoxE15 Vs SoxE11</b> |                                  |
|-------------------------|------------------------------------------|-------------------------|----------------------------------|
| <b>S15vsW15</b>         | <b>Fold Change &gt;1.2</b>               | <b>S15vsS11</b>         | <b>Fold Change &gt;1.2</b>       |
| Antxr1                  | anthrax toxin receptor 1                 | Abcc9                   | ATP-binding cassette, sub-fam    |
| Arntl                   | aryl hydrocarbon receptor nuclear tra    | Acvr1                   | activin A receptor, type 1       |
| C3ar1                   | complement component 3a receptor         | Adam22                  | a disintegrin and metalloptic    |
| Eda2r                   | ectodysplasin A2 isoform receptor        | Adcyap1r1               | adenylate cyclase activating po  |
| Epha2                   | Eph receptor A2                          | Agtr1a                  | angiotensin II receptor, type 1a |
| Epha4                   | Eph receptor A4                          | Ahr                     | aryl-hydrocarbon receptor        |
| Epha7                   | Eph receptor A7                          | Amfr                    | autocrine motility factor recep  |
| ErbB3                   | v-erb-b2 erythroblastic leukemia viral   | Arntl                   | aryl hydrocarbon receptor nuc    |
| Fzd4                    | frizzled homolog 4 (Drosophila)          | Atnr                    | attractin                        |
| Fzd6                    | frizzled homolog 6 (Drosophila)          | Avpr1a                  | arginine vasopressin receptor    |
| Fzd7                    | frizzled homolog 7 (Drosophila)          | Bai2                    | brain-specific angiogenesis inh  |
| Gab1                    | growth factor receptor bound proteir     | Bai3                    | brain-specific angiogenesis inh  |
| Gabra4                  | gamma-aminobutyric acid (GABA) A r       | Bmpr2                   | bone morphogenic protein rec     |
| Gfra1                   | glial cell line derived neurotrophic fac | Calcrl                  | calcitonin receptor-like         |
| Gpr124                  | G protein-coupled receptor 124           | Cd36                    | CD36 antigen                     |
| Gpr125                  | G protein-coupled receptor 125           | Celsr3                  | cadherin, EGF LAG seven-pass     |
| Gpr126                  | G protein-coupled receptor 126           | Chrna3                  | cholinergic receptor, nicotinic, |
| Gprc5b                  | G protein-coupled receptor, family C,    | Chrna5                  | cholinergic receptor, nicotinic, |
| Grb10                   | growth factor receptor bound proteir     | Chrna7                  | cholinergic receptor, nicotinic, |
| Grik3                   | glutamate receptor, ionotropic, kaini    | ChrnB2                  | cholinergic receptor, nicotinic, |
| Hmnr                    | hyaluronan mediated motility recepto     | ChrnB4                  | cholinergic receptor, nicotinic, |
| Igf2r                   | insulin-like growth factor 2 receptor    | Clec2d                  | C-type lectin domain family 2,   |
| Il1rap                  | interleukin 1 receptor accessory prote   | Cxcr4                   | chemokine (C-X-C motif) recep    |
| Il1rl2                  | interleukin 1 receptor-like 2            | Dner                    | delta/notch-like EGF-related re  |
| Irs1                    | insulin receptor substrate 1             | Ednrb                   | endothelin receptor type B       |
| Itga2                   | integrin alpha 2                         | Epha2                   | Eph receptor A2                  |
| Itga6                   | integrin alpha 6                         | Epha4                   | Eph receptor A4                  |

|           |                                         |          |                                  |
|-----------|-----------------------------------------|----------|----------------------------------|
| Itgav     | integrin alpha V                        | Epha5    | Eph receptor A5                  |
| Itgb5     | integrin beta 5                         | Epha6    | Eph receptor A6                  |
| Kdr       | kinase insert domain protein receptor   | Epha7    | Eph receptor A7                  |
| Lphn2     | latrophilin 2                           | Ephb1    | Eph receptor B1                  |
| Mertk     | c-mer proto-oncogene tyrosine kinase    | Esrrg    | estrogen-related receptor gamma  |
| Mrc1      | mannose receptor, C type 1              | Fcgrt    | Fc receptor, IgG, alpha chain tr |
| Notch2    | Notch gene homolog 2 (Drosophila)       | Fzd6     | frizzled homolog 6 (Drosophila   |
| Nr2f1     | nuclear receptor subfamily 2, group F   | Gabbr1   | gamma-aminobutyric acid (GA      |
| Nr2f2     | similar to COUP-TFI; nuclear receptor   | Gabra4   | gamma-aminobutyric acid (GA      |
| Nr4a1     | nuclear receptor subfamily 4, group A   | Gabrb3   | gamma-aminobutyric acid (GA      |
| Ogfr      | opioid growth factor receptor           | Gabrg2   | gamma-aminobutyric acid (GA      |
| Olf1318   | olfactory receptor 1318                 | Gpr126   | G protein-coupled receptor 12    |
| Olf908    | olfactory receptor 908                  | Gpr155   | G protein-coupled receptor 15    |
| P2rx7     | purinergic receptor P2X, ligand-gated   | Gpr173   | G-protein coupled receptor 17    |
| Phb2      | prohibitin 2                            | Gpr22    | G protein-coupled receptor 22    |
| Ptgfrn    | prostaglandin F2 receptor negative re   | Gpr37l1  | G protein-coupled receptor 37    |
| Ptk7      | PTK7 protein tyrosine kinase 7          | Gpr39    | G protein-coupled receptor 39    |
| Robo1     | roundabout homolog 1 (Drosophila)       | Gpr56    | G protein-coupled receptor 56    |
| Ror1      | receptor tyrosine kinase-like orphan r  | Gpr64    | G protein-coupled receptor 64    |
| Rpsa      | predicted gene 9323; predicted gene     | Gpr98    | G protein-coupled receptor 98    |
| Ryk       | receptor-like tyrosine kinase           | Grb14    | growth factor receptor bound     |
| Slitrk2   | SLIT and NTRK-like family, member 2     | Gria2    | glutamate receptor, ionotropic   |
| Srprb     | signal recognition particle receptor, B | Gria3    | glutamate receptor, ionotropic   |
| Stab2     | similar to FEX2; stabilin 2             | Gria4    | glutamate receptor, ionotropic   |
| Tmem123   | transmembrane protein 123               | Grik1    | glutamate receptor, ionotropic   |
| Tnfrsf10b | tumor necrosis factor receptor super    | Grik2    | glutamate receptor, ionotropic   |
| Tnfrsf12a | tumor necrosis factor receptor super    | Grik3    | glutamate receptor, ionotropic   |
| Tnfrsf19  | tumor necrosis factor receptor super    | Grin1    | glutamate receptor, ionotropic   |
| Trip13    | thyroid hormone receptor interactor     | Grin2b   | glutamate receptor, ionotropic   |
|           |                                         | Grm7     | glutamate receptor, metabotro    |
|           |                                         | Grm8     | glutamate receptor, metabotro    |
|           |                                         | Htr2b    | 5-hydroxytryptamine (seroni      |
|           |                                         | Htr3a    | 5-hydroxytryptamine (seroni      |
|           |                                         | Htr4     | 5 hydroxytryptamine (seroni      |
|           |                                         | Ifngr2   | interferon gamma receptor 2      |
|           |                                         | Il13ra1  | interleukin 13 receptor, alpha   |
|           |                                         | Il17rd   | interleukin 17 receptor D        |
|           |                                         | Il1rapl1 | interleukin 1 receptor accesso   |
|           |                                         | Il6st    | interleukin 6 signal transducer  |
|           |                                         | Irs1     | insulin receptor substrate 1     |
|           |                                         | Itga1    | integrin alpha 1                 |
|           |                                         | Itga2    | integrin alpha 2                 |
|           |                                         | Itgb3    | integrin beta 3                  |
|           |                                         | Lgr5     | leucine rich repeat containing   |
|           |                                         | Lifr     | leukemia inhibitory factor rece  |
|           |                                         | Lphn1    | latrophilin 1                    |

|  |          |                                   |
|--|----------|-----------------------------------|
|  | Lphn2    | latrophilin 2                     |
|  | Lrp11    | low density lipoprotein receptor  |
|  | Mfsd6    | major facilitator superfamily d   |
|  | Mmd2     | monocyte to macrophage diffe      |
|  | Notch2   | Notch gene homolog 2 (Droso       |
|  | Npr2     | natriuretic peptide receptor 2    |
|  | Npy1r    | neuropeptide Y receptor Y1        |
|  | Npy2r    | neuropeptide Y receptor Y2        |
|  | Nr1d2    | nuclear receptor subfamily 1, g   |
|  | Nr1h4    | nuclear receptor subfamily 1, g   |
|  | Nr2c2    | nuclear receptor subfamily 2, g   |
|  | Nr3c1    | nuclear receptor subfamily 3, g   |
|  | Nr4a1    | nuclear receptor subfamily 4, g   |
|  | Nr4a2    | nuclear receptor subfamily 4, g   |
|  | Olfr1316 | olfactory receptor 1316           |
|  | Olfr1318 | olfactory receptor 1318           |
|  | Olfr1402 | olfactory receptor 1402           |
|  | P2rx7    | purinergic receptor P2X, ligand   |
|  | P2ry1    | purinergic receptor P2Y, G-pro    |
|  | Paqr8    | progesterone and adipoQ receptor  |
|  | Pcdha10  |                                   |
|  | Plxna2   | plexin A2                         |
|  | Plxna3   | plexin A3                         |
|  | Plxnb1   | plexin B1                         |
|  | Plxnb3   | plexin B3                         |
|  | Ptger4   | prostaglandin E receptor 4 (sub   |
|  | Ptpn3    | protein tyrosine phosphatase,     |
|  | Ptprj    | protein tyrosine phosphatase,     |
|  | Ptprn2   | protein tyrosine phosphatase,     |
|  | Ptprp    | protein tyrosine phosphatase,     |
|  | Ptprs    | protein tyrosine phosphatase,     |
|  | Ptprz1   | protein tyrosine phosphatase,     |
|  | Ramp1    | receptor (calcitonin) activity m  |
|  | Rarb     | retinoic acid receptor, beta      |
|  | Robo2    | roundabout homolog 2 (Droso       |
|  | Rora     | RAR-related orphan receptor a     |
|  | Rorc     | RAR-related orphan receptor g     |
|  | Ryr2     | ryanodine receptor 2, cardiac     |
|  | S1pr3    | sphingosine-1-phosphate rece      |
|  | Slc22a17 | solute carrier family 22 (organi  |
|  | Slitrk1  | SLIT and NTRK-like family, mem    |
|  | Slitrk2  | SLIT and NTRK-like family, mem    |
|  | Slitrk3  | SLIT and NTRK-like family, mem    |
|  | Sorl1    | similar to sortilin-related recep |
|  | Sort1    | sortilin 1                        |
|  | Sv2a     | synaptic vesicle glycoprotein 2   |

|                       |                                          |                       |                                  |
|-----------------------|------------------------------------------|-----------------------|----------------------------------|
|                       |                                          | Sv2b                  | synaptic vesicle glycoprotein 2  |
|                       |                                          | Sv2c                  | synaptic vesicle glycoprotein 2  |
|                       |                                          | Tacr3                 | tachykinin receptor 3            |
|                       |                                          | Tas2r143              | taste receptor, type 2, membe    |
|                       |                                          | Thra                  | thyroid hormone receptor alph    |
|                       |                                          | Tnfrsf12a             | tumor necrosis factor receptor   |
|                       |                                          | Traf5                 | TNF receptor-associated factor   |
|                       |                                          | Trpc1                 | transient receptor potential ca  |
|                       |                                          | Trpc6                 | transient receptor potential ca  |
|                       |                                          | Trpm3                 | transient receptor potential ca  |
|                       |                                          | Trpv3                 | transient receptor potential ca  |
|                       |                                          | Unc5d                 | unc-5 homolog D (C. elegans)     |
|                       |                                          | Vldlr                 | very low density lipoprotein re  |
|                       |                                          | Xpr1                  | xenotropic and polytropic retro  |
| <b>Wnt15 vs Sox15</b> |                                          | <b>Wnt15 vs Wnt11</b> |                                  |
| <b>W15vsS15</b>       | <b>Fold Change &gt;1.2</b>               | <b>W15vsW11</b>       | <b>Fold Change &gt;1.2</b>       |
| Adam22                | a disintegrin and metallopeptidase dc    | Abcc9                 | ATP-binding cassette, sub-fam    |
| Adra2a                | adrenergic receptor, alpha 2a            | Acvr2a                | activin receptor IIA             |
| Alk                   | anaplastic lymphoma kinase               | Adam22                | a disintegrin and metallopeptic  |
| Avpr1a                | arginine vasopressin receptor 1A         | Adcyap1r1             | adenylate cyclase activating po  |
| Bai3                  | brain-specific angiogenesis inhibitor 3  | Adra2a                | adrenergic receptor, alpha 2a    |
| Bmpr1b                | bone morphogenetic protein recepto       | Agtr1a                | angiotensin II receptor, type 1a |
| Calcrl                | calcitonin receptor-like                 | Ahr                   | aryl-hydrocarbon receptor        |
| Celsr3                | cadherin, EGF LAG seven-pass G-type      | Amfr                  | autocrine motility factor recep  |
| Chrna3                | cholinergic receptor, nicotinic, alpha   | Ar                    | androgen receptor                |
| Chrna5                | cholinergic receptor, nicotinic, alpha   | Atp6ap2               | ATPase, H+ transporting, lysos   |
| Cnr1                  | cannabinoid receptor 1 (brain)           | Atrn                  | attractin                        |
| Cxadr                 | coxsackie virus and adenovirus recep     | Avpr1a                | arginine vasopressin receptor    |
| Cxcr4                 | chemokine (C-X-C motif) receptor 4       | Bai2                  | brain-specific angiogenesis inh  |
| Cxcr7                 | chemokine (C-X-C motif) receptor 7       | Bai3                  | brain-specific angiogenesis inh  |
| Darc                  | Duffy blood group, chemokine recept      | Bmpr1b                | bone morphogenetic protein r     |
| Dcc                   | deleted in colorectal carcinoma          | Bmpr2                 | bone morphogenic protein rec     |
| Dner                  | delta/notch-like EGF-related receptor    | Calcrl                | calcitonin receptor-like         |
| Epha5                 | Eph receptor A5                          | Celsr3                | cadherin, EGF LAG seven-pass     |
| Epha6                 | Eph receptor A6                          | Chrm2                 | cholinergic receptor, muscarin   |
| Gabbr1                | gamma-aminobutyric acid (GABA) B r       | Chrna3                | cholinergic receptor, nicotinic, |
| Gabra3                | gamma-aminobutyric acid (GABA) A r       | Chrna5                | cholinergic receptor, nicotinic, |
| Gabrb3                | gamma-aminobutyric acid (GABA) A r       | Chrna7                | cholinergic receptor, nicotinic, |
| Gabrg2                | gamma-aminobutyric acid (GABA) A r       | Chrnbl                | cholinergic receptor, nicotinic, |
| Galr2                 | galanin receptor 2                       | Chrnbl                | cholinergic receptor, nicotinic, |
| Gfra2                 | glial cell line derived neurotrophic fac | Chrnbl                | cholinergic receptor, nicotinic, |
| Glp1r                 | glucagon-like peptide 1 receptor; sim    | Cnr1                  | cannabinoid receptor 1 (brain)   |
| Gpr155                | G protein-coupled receptor 155           | Csf2ra                | colony stimulating factor 2 rec  |
| Gpr158                | G protein-coupled receptor 158           | Cxadr                 | coxsackie virus and adenovirus   |
| Gpr64                 | G protein-coupled receptor 64            | Cxcr4                 | chemokine (C-X-C motif) recep    |



|         |                                          |         |                                   |
|---------|------------------------------------------|---------|-----------------------------------|
| Gpr85   | G protein-coupled receptor 85            | Cxcr7   | chemokine (C-X-C motif) recep     |
| Gria1   | glutamate receptor, ionotropic, AMPA     | Darc    | Duffy blood group, chemokine      |
| Gria2   | glutamate receptor, ionotropic, AMPA     | Dner    | delta/notch-like EGF-related re   |
| Grik1   | glutamate receptor, ionotropic, kainate  | Dpp4    | dipeptidylpeptidase 4             |
| Grin1   | glutamate receptor, ionotropic, NMDA     | Ednrb   | endothelin receptor type B        |
| Grm7    | glutamate receptor, metabotropic 7       | Epha4   | Eph receptor A4                   |
| Htr1d   | 5-hydroxytryptamine (serotonin) rece     | Epha5   | Eph receptor A5                   |
| Htr2b   | 5-hydroxytryptamine (serotonin) rece     | Epha6   | Eph receptor A6                   |
| Htr3b   | 5-hydroxytryptamine (serotonin) rece     | Ephb1   | Eph receptor B1                   |
| Htr4    | 5 hydroxytryptamine (serotonin) rece     | Esrrg   | estrogen-related receptor gam     |
| Il13ra1 | interleukin 13 receptor, alpha 1         | Ffar3   | free fatty acid receptor 3        |
| Itga3   | integrin alpha 3                         | Gab2    | growth factor receptor bound      |
| Lcor    | ligand dependent nuclear receptor co     | Gabbr1  | gamma-aminobutyric acid (GA       |
| Lpar4   | lysophosphatidic acid receptor 4         | Gabrb2  | gamma-aminobutyric acid (GA       |
| Lrp11   | low density lipoprotein receptor-relat   | Gabrb3  | gamma-aminobutyric acid (GA       |
| Lrp1b   | low density lipoprotein-related prote    | Gabrg2  | gamma-aminobutyric acid (GA       |
| Ltk     | leukocyte tyrosine kinase                | Galr1   | galanin receptor 1                |
| Npr2    | natriuretic peptide receptor 2           | Gfra2   | glial cell line derived neurotrop |
| Npy1r   | neuropeptide Y receptor Y1               | Glp1r   | glucagon-like peptide 1 recept    |
| Npy2r   | neuropeptide Y receptor Y2               | Gpr126  | G protein-coupled receptor 12     |
| Nrp2    | neuropilin 2                             | Gpr128  | G protein-coupled receptor 12     |
| Ntrk3   | neurotrophic tyrosine kinase, recepto    | Gpr137c | G protein-coupled receptor 13     |
| Olf1382 | olfactory receptor 1382                  | Gpr155  | G protein-coupled receptor 15     |
| Olf191  | olfactory receptor 191                   | Gpr158  | G protein-coupled receptor 15     |
| Olf264  | olfactory receptor 264; olfactory rece   | Gpr165  | G protein-coupled receptor 16     |
| Oprm1   | opioid receptor, mu 1                    | Gpr173  | G-protein coupled receptor 17     |
| Pcdha10 | similar to protocadherin; protocadhe     | Gpr176  | G protein-coupled receptor 17     |
| Pgr     | progesterone receptor                    | Gpr22   | G protein-coupled receptor 22     |
| Plxna3  | plexin A3                                | Gpr56   | G protein-coupled receptor 56     |
| Plxna4  | plexin A4                                | Gpr64   | G protein-coupled receptor 64     |
| Plxnc1  | plexin C1; similar to plexin C1          | Gpr75   | G protein-coupled receptor 75     |
| Prokr1  | prokineticin receptor 1                  | Gpr85   | G protein-coupled receptor 85     |
| Pth2r   | parathyroid hormone 2 receptor           | Gpr98   | G protein-coupled receptor 98     |
| Ptprg   | protein tyrosine phosphatase, recept     | Grb14   | growth factor receptor bound      |
| Ptprn   | protein tyrosine phosphatase, recept     | Gria1   | glutamate receptor, ionotropic    |
| Ptprn2  | protein tyrosine phosphatase, recept     | Gria2   | glutamate receptor, ionotropic    |
| Ptpro   | protein tyrosine phosphatase, non-re     | Gria3   | glutamate receptor, ionotropic    |
| Ptpr    | protein tyrosine phosphatase, recept     | Gria4   | glutamate receptor, ionotropic    |
| Ramp1   | receptor (calcitonin) activity modifyin  | Grid1   | glutamate receptor, ionotropic    |
| Robo2   | roundabout homolog 2 (Drosophila)        | Grik1   | glutamate receptor, ionotropic    |
| Ryr2    | ryanodine receptor 2, cardiac            | Grik2   | glutamate receptor, ionotropic    |
| Ryr3    | ryanodine receptor 3                     | Grik4   | glutamate receptor, ionotropic    |
| Slitrk3 | SLIT and NTRK-like family, member 3      | Grin1   | glutamate receptor, ionotropic    |
| Sorl1   | similar to sortilin-related receptor, LD | Grin2b  | glutamate receptor, ionotropic    |
| Sv2a    | synaptic vesicle glycoprotein 2 a        | Grm1    | similar to metabotropic glutam    |
| Sv2c    | synaptic vesicle glycoprotein 2c         | Grm7    | glutamate receptor, metabotro     |



|          |                                        |          |                                 |
|----------|----------------------------------------|----------|---------------------------------|
| Taar1    | trace amine-associated receptor 1      | Htr1d    | 5-hydroxytryptamine (seroton    |
| Thra     | thyroid hormone receptor alpha; simi   | Htr2b    | 5-hydroxytryptamine (seroton    |
| Tnfrsf18 | tumor necrosis factor receptor super   | Htr3a    | 5-hydroxytryptamine (seroton    |
| Trpc4    | transient receptor potential cation ch | Htr3b    | 5-hydroxytryptamine (seroton    |
| Trpc6    | transient receptor potential cation ch | Htr4     | 5 hydroxytryptamine (serotoni   |
| Tyro3    | similar to Rse; TYRO3 protein tyrosine | lfngr2   | interferon gamma receptor 2     |
| Unc5c    | unc-5 homolog C (C. elegans)           | Il13ra1  | interleukin 13 receptor, alpha  |
| Unc5d    | unc-5 homolog D (C. elegans)           | Il17rd   | interleukin 17 receptor D       |
| Vldlr    | very low density lipoprotein receptor  | Il1rapl1 | interleukin 1 receptor accesso  |
| Vmn2r29  | vomer nasal 2, receptor, pseudogene    | Il1rapl2 | interleukin 1 receptor accesso  |
| Xpr1     | xenotropic and polytropic retrovirus r | Il4ra    | interleukin 4 receptor, alpha   |
|          |                                        | Insr     | insulin receptor                |
|          |                                        | Itga1    | integrin alpha 1                |
|          |                                        | Itga2    | integrin alpha 2                |
|          |                                        | Itga3    | integrin alpha 3                |
|          |                                        | Itgb3    | integrin beta 3                 |
|          |                                        | Kit      | kit oncogene                    |
|          |                                        | Lcor     | ligand dependent nuclear rece   |
|          |                                        | Lgr5     | leucine rich repeat containing  |
|          |                                        | Lmbr1    | limb region 1                   |
|          |                                        | Lpar4    | lysophosphatidic acid receptor  |
|          |                                        | Lphn1    | latrophilin 1                   |
|          |                                        | Lphn2    | latrophilin 2                   |
|          |                                        | Lphn3    | latrophilin 3                   |
|          |                                        | Lrp11    | low density lipoprotein recepto |
|          |                                        | Lrp1b    | low density lipoprotein-related |
|          |                                        | Ltk      | leukocyte tyrosine kinase       |
|          |                                        | Mfsd6    | major facilitator superfamily d |
|          |                                        | Mmd2     | monocyte to macrophage diffe    |
|          |                                        | Mrgprg   | MAS-related GPR, member G       |
|          |                                        | Mst1r    | macrophage stimulating 1 rece   |
|          |                                        | Ncor1    | nuclear receptor co-repressor   |
|          |                                        | Npr2     | natriuretic peptide receptor 2  |
|          |                                        | Npy1r    | neuropeptide Y receptor Y1      |
|          |                                        | Npy2r    | neuropeptide Y receptor Y2      |
|          |                                        | Nr1d2    | nuclear receptor subfamily 1, g |
|          |                                        | Nr2c2    | nuclear receptor subfamily 2, g |
|          |                                        | Nr3c1    | nuclear receptor subfamily 3, g |
|          |                                        | Nr4a1    | nuclear receptor subfamily 4, g |
|          |                                        | Nr6a1    | nuclear receptor subfamily 6, g |
|          |                                        | Nrp2     | neuropilin 2                    |
|          |                                        | Ntrk3    | neurotrophic tyrosine kinase, r |
|          |                                        | Olfr1042 | olfactory receptor 1042         |
|          |                                        | Olfr1043 | olfactory receptor 1043         |
|          |                                        | Olfr1138 | olfactory receptor 1138         |
|          |                                        | Olfr1361 | olfactory receptor 1361         |

|  |  |         |                                   |
|--|--|---------|-----------------------------------|
|  |  | Olfr159 | olfactory receptor 159            |
|  |  | Olfr288 | olfactory receptor 288; olfacto   |
|  |  | Olfr78  | olfactory receptor 78             |
|  |  | Olfr938 | olfactory receptor 938            |
|  |  | Oprl1   | opioid receptor-like 1            |
|  |  | Oprm1   | opioid receptor, mu 1             |
|  |  | P2rx7   | purinergic receptor P2X, ligand   |
|  |  | P2ry6   | pyrimidinergic receptor P2Y, G    |
|  |  | Paqr8   | progesterin and adipoQ receptor   |
|  |  | Pcdha10 |                                   |
|  |  | Pgr     | progesterone receptor             |
|  |  | Plxna2  | plexin A2                         |
|  |  | Plxna3  | plexin A3                         |
|  |  | Plxnb3  | plexin B3                         |
|  |  | Plxnc1  | plexin C1; similar to plexin C1   |
|  |  | Prokr1  | prokineticin receptor 1           |
|  |  | Ptger3  | prostaglandin E receptor 3 (sub   |
|  |  | Ptger4  | prostaglandin E receptor 4 (sub   |
|  |  | Ptgir   | prostaglandin I receptor (IP)     |
|  |  | Ptpn3   | protein tyrosine phosphatase,     |
|  |  | Ptprb   | protein tyrosine phosphatase,     |
|  |  | Ptprg   | protein tyrosine phosphatase,     |
|  |  | Ptprj   | protein tyrosine phosphatase,     |
|  |  | Ptprn   | protein tyrosine phosphatase,     |
|  |  | Ptprn2  | protein tyrosine phosphatase,     |
|  |  | Ptpro   | protein tyrosine phosphatase,     |
|  |  | Ptprp   | protein tyrosine phosphatase,     |
|  |  | Ptprs   | protein tyrosine phosphatase,     |
|  |  | Ptprt   | protein tyrosine phosphatase,     |
|  |  | Ptprz1  | protein tyrosine phosphatase,     |
|  |  | Ramp1   | receptor (calcitonin) activity m  |
|  |  | Rarb    | retinoic acid receptor, beta      |
|  |  | Reep5   | receptor accessory protein 5      |
|  |  | Robo2   | roundabout homolog 2 (Droso       |
|  |  | Rora    | RAR-related orphan receptor a     |
|  |  | Rorc    | RAR-related orphan receptor g     |
|  |  | Ryr2    | ryanodine receptor 2, cardiac     |
|  |  | Ryr3    | ryanodine receptor 3              |
|  |  | Sctr    | secretin receptor; similar to Sc  |
|  |  | Slitrk1 | SLIT and NTRK-like family, mem    |
|  |  | Slitrk3 | SLIT and NTRK-like family, mem    |
|  |  | Sorl1   | similar to sortilin-related recep |
|  |  | Sstr4   | somatostatin receptor 4           |
|  |  | Sv2a    | synaptic vesicle glycoprotein 2   |
|  |  | Sv2b    | synaptic vesicle glycoprotein 2   |
|  |  | Sv2c    | synaptic vesicle glycoprotein 2   |

|                        |                                                           |                        |                                                          |
|------------------------|-----------------------------------------------------------|------------------------|----------------------------------------------------------|
|                        |                                                           | Taar1                  | trace amine-associated receptor                          |
|                        |                                                           | Tacr3                  | tachykinin receptor 3                                    |
|                        |                                                           | Tas2r143               | taste receptor, type 2, member 143                       |
|                        |                                                           | Thra                   | thyroid hormone receptor alpha                           |
|                        |                                                           | Tnfrsf21               | tumor necrosis factor receptor superfamily member 21     |
|                        |                                                           | Tnfsf18                | tumor necrosis factor (ligand) superfamily member 18     |
|                        |                                                           | Trem2                  | triggering receptor expressed on myeloid cells 2         |
|                        |                                                           | Trpc1                  | transient receptor potential canonical 1                 |
|                        |                                                           | Trpc4                  | transient receptor potential canonical 4                 |
|                        |                                                           | Trpc6                  | transient receptor potential canonical 6                 |
|                        |                                                           | Trpc7                  | transient receptor potential canonical 7                 |
|                        |                                                           | Trpm3                  | transient receptor potential canonical 3                 |
|                        |                                                           | Tyro3                  | similar to Rse; TYRO3 protein tyrosine kinase            |
|                        |                                                           | Unc5a                  | unc-5 homolog A (C. elegans)                             |
|                        |                                                           | Unc5d                  | unc-5 homolog D (C. elegans)                             |
|                        |                                                           | Vldlr                  | very low density lipoprotein receptor                    |
|                        |                                                           | Vmn2r29                | vomerin 2, receptor 29                                   |
|                        |                                                           | Vmn2r81                | vomerin 2, receptor 81; vomeronasal receptor 81          |
|                        |                                                           | Xpr1                   | xenotropic and polytropic retrovirus receptor 1          |
| <b>SoxE11vsCtrlE11</b> |                                                           | <b>SoxE15vsCtrlE15</b> |                                                          |
| <b>S11vsC11</b>        | <b>Fold Change &gt;1.2</b>                                | <b>S15vsC15</b>        | <b>Fold Change &gt;1.2</b>                               |
| Acvr1                  | activin A receptor, type 1                                | Acvr1b                 | activin A receptor, type 1B                              |
| Adam22                 | a disintegrin and metalloproteinase domain containing 22  | Acvr2a                 | activin receptor IIA                                     |
| Adcyap1r1              | adenylate cyclase activating polypeptide 1 receptor 1     | Adam22                 | a disintegrin and metalloproteinase domain containing 22 |
| Agtr2                  | angiotensin II receptor, type 2                           | Adcyap1r1              | adenylate cyclase activating polypeptide 1 receptor 1    |
| Ahr                    | aryl-hydrocarbon receptor                                 | Agtr1a                 | angiotensin II receptor, type 1a                         |
| Alk                    | anaplastic lymphoma kinase                                | Alk                    | anaplastic lymphoma kinase                               |
| Arntl                  | aryl hydrocarbon receptor nuclear translocator            | Arntl                  | aryl hydrocarbon receptor nuclear translocator           |
| Bai1                   | brain-specific angiogenesis inhibitor 1                   | Atrn                   | attractin                                                |
| Bai3                   | brain-specific angiogenesis inhibitor 3                   | Bai3                   | brain-specific angiogenesis inhibitor 3                  |
| Celsr2                 | cadherin, EGF LAG seven-pass G-type 2                     | Celsr2                 | cadherin, EGF LAG seven-pass G-type 2                    |
| Celsr3                 | cadherin, EGF LAG seven-pass G-type 3                     | Celsr3                 | cadherin, EGF LAG seven-pass G-type 3                    |
| Chrna3                 | cholinergic receptor, nicotinic, alpha 3                  | Chrna3                 | cholinergic receptor, nicotinic, alpha 3                 |
| Chrna4                 | cholinergic receptor, nicotinic, alpha 4                  | Chrna4                 | cholinergic receptor, nicotinic, alpha 4                 |
| Chrna5                 | cholinergic receptor, nicotinic, alpha 5                  | Chrna5                 | cholinergic receptor, nicotinic, alpha 5                 |
| Chrn2                  | cholinergic receptor, nicotinic, beta 2                   | Chrna6                 | cholinergic receptor, nicotinic, alpha 6                 |
| Chrn4                  | cholinergic receptor, nicotinic, beta 4                   | Chrna7                 | cholinergic receptor, nicotinic, alpha 7                 |
| Cnr1                   | cannabinoid receptor 1 (brain)                            | Chrn2                  | cholinergic receptor, nicotinic, beta 2                  |
| Dcc                    | deleted in colorectal carcinoma                           | Chrn4                  | cholinergic receptor, nicotinic, beta 4                  |
| Dear1                  | dual endothelin 1/angiotensin II receptor type 1          | Cnr1                   | cannabinoid receptor 1 (brain)                           |
| Eda2r                  | ectodysplasin A2 isoform receptor                         | Darc                   | Duffy blood group, chemokine receptor 1                  |
| Ednrb                  | endothelin receptor type B                                | Dcc                    | deleted in colorectal carcinoma                          |
| Epha3                  | Eph receptor A3                                           | Dear1                  | dual endothelin 1/angiotensin II receptor type 1         |
| Ephb2                  | Eph receptor B2                                           | Dgcr2                  | DiGeorge syndrome critical region 2                      |
| ErbB3                  | v-erb-b2 erythroblastic leukemia viral oncogene homolog 3 | Dner                   | delta/notch-like EGF-related receptor 1                  |

|         |                                                       |         |                                                       |
|---------|-------------------------------------------------------|---------|-------------------------------------------------------|
| Fkbp4   | FK506 binding protein 4                               | Eda2r   | ectodysplasin A2 isoform receptor                     |
| Fzd3    | frizzled homolog 3 (Drosophila)                       | Ednrb   | endothelin receptor type B                            |
| Gab1    | growth factor receptor bound protein                  | Epha10  | Eph receptor A10                                      |
| Gab2    | growth factor receptor bound protein                  | Epha6   | Eph receptor A6                                       |
| Gabrb3  | gamma-aminobutyric acid (GABA) A receptor             | ErbB3   | v-erb-b2 erythroblastic leukemia                      |
| Gabrg2  | gamma-aminobutyric acid (GABA) A receptor             | Ffar3   | free fatty acid receptor 3                            |
| Gfra1   | glial cell line derived neurotrophic factor           | Fkbp4   | FK506 binding protein 4                               |
| Gfra2   | glial cell line derived neurotrophic factor           | Fzd3    | frizzled homolog 3 (Drosophila)                       |
| Gfra3   | glial cell line derived neurotrophic factor           | Fzd6    | frizzled homolog 6 (Drosophila)                       |
| Git1    | G protein-coupled receptor kinase-interacting protein | Gab1    | growth factor receptor bound protein                  |
| Gpr125  | G protein-coupled receptor 125                        | Gab2    | growth factor receptor bound protein                  |
| Gpr126  | G protein-coupled receptor 126                        | Gabra6  | gamma-aminobutyric acid (GABA) A receptor             |
| Gpr17   | G protein-coupled receptor 17                         | Gabrb3  | gamma-aminobutyric acid (GABA) A receptor             |
| Gpr19   | G protein-coupled receptor 19                         | Gabrg2  | gamma-aminobutyric acid (GABA) A receptor             |
| Gprc5b  | G protein-coupled receptor, family C, member 5b       | Gfra1   | glial cell line derived neurotrophic factor           |
| Grb10   | growth factor receptor bound protein                  | Gfra2   | glial cell line derived neurotrophic factor           |
| Gria2   | glutamate receptor, ionotropic, AMPA receptor 2       | Gfra3   | glial cell line derived neurotrophic factor           |
| Gria4   | glutamate receptor, ionotropic, AMPA receptor 4       | Git1    | G protein-coupled receptor kinase-interacting protein |
| Grik2   | glutamate receptor, ionotropic, kainate receptor 2    | Gpr125  | G protein-coupled receptor 125                        |
| Grik3   | glutamate receptor, ionotropic, kainate receptor 3    | Gpr126  | G protein-coupled receptor 126                        |
| Htr3b   | 5-hydroxytryptamine (serotonin) receptor 3b           | Gpr137c | G protein-coupled receptor 137c                       |
| Igf1r   | insulin-like growth factor I receptor                 | Gpr155  | G protein-coupled receptor 155                        |
| Igsf11  | immunoglobulin superfamily, member 11                 | Gpr158  | G protein-coupled receptor 158                        |
| Il1rap  | interleukin 1 receptor accessory protein              | Gpr17   | G protein-coupled receptor 17                         |
| Il1rl2  | interleukin 1 receptor-like 2                         | Gpr173  | G-protein coupled receptor 173                        |
| Itga4   | integrin alpha 4                                      | Gpr19   | G protein-coupled receptor 19                         |
| Itga6   | integrin alpha 6                                      | Gpr22   | G protein-coupled receptor 22                         |
| Jmjd6   | jumonji domain containing 6                           | Gpr37l1 | G protein-coupled receptor 37l1                       |
| Ldlrad3 | low density lipoprotein receptor class B member 3     | Gpr56   | G protein-coupled receptor 56                         |
| Lpar3   | lysophosphatidic acid receptor 3                      | Gpr75   | G protein-coupled receptor 75                         |
| Lrp11   | low density lipoprotein receptor-related protein 11   | Gpr85   | G protein-coupled receptor 85                         |
| Lrp5    | low density lipoprotein receptor-related protein 5    | Gpr98   | G protein-coupled receptor 98                         |
| Mfsd6   | major facilitator superfamily domain containing 6     | Gprc5b  | G protein-coupled receptor, family C, member 5b       |
| Ngfr    | nerve growth factor receptor (TNFR superfamily)       | Gria2   | glutamate receptor, ionotropic, AMPA receptor 2       |
| Notch1  | Notch gene homolog 1 (Drosophila)                     | Gria4   | glutamate receptor, ionotropic, AMPA receptor 4       |
| Notch2  | Notch gene homolog 2 (Drosophila)                     | Grid2   | glutamate receptor, ionotropic, DHP receptor 2        |
| Nr2c2ap | nuclear receptor 2C2-associated protein               | Grik2   | glutamate receptor, ionotropic, kainate receptor 2    |
| Nr4a1   | nuclear receptor subfamily 4, group A, member 1       | Grik3   | glutamate receptor, ionotropic, kainate receptor 3    |
| Nrp1    | neuropilin 1                                          | Grik5   | glutamate receptor, ionotropic, kainate receptor 5    |
| Olf1043 | olfactory receptor 1043                               | Grin1   | glutamate receptor, ionotropic, NMDA receptor 1       |
| Olf1382 | olfactory receptor 1382                               | Grin2b  | glutamate receptor, ionotropic, NMDA receptor 2b      |
| P2rx4   | purinergic receptor P2X, ligand-gated ion channel 4   | Grif1   | glucocorticoid receptor DNA binding domain            |
| Phb2    | prohibitin 2                                          | Grm1    | similar to metabotropic glutamate receptor 1          |
| Plxna4  | plexin A4                                             | H2-Ke2  | H2-K region expressed gene 2                          |
| Ptpn1   | protein tyrosine phosphatase, non-receptor type 1     | Hrh3    | histamine receptor H3                                 |
| Ptpn9   | protein tyrosine phosphatase, non-receptor type 9     | Htr2b   | 5-hydroxytryptamine (serotonin) receptor 2b           |

|          |                                                                      |          |                                                            |
|----------|----------------------------------------------------------------------|----------|------------------------------------------------------------|
| Ptprg    | protein tyrosine phosphatase, receptor type 13                       | Htr3a    | 5-hydroxytryptamine (serotonin) receptor 3A                |
| Ptprj    | protein tyrosine phosphatase, receptor type 12                       | Htr3b    | 5-hydroxytryptamine (serotonin) receptor 3B                |
| Ptprm    | protein tyrosine phosphatase, receptor type 11                       | Htr4     | 5 hydroxytryptamine (serotonin) receptor 4                 |
| Ptprn    | protein tyrosine phosphatase, receptor type 10                       | Igf1r    | insulin-like growth factor I receptor                      |
| Ptprn2   | protein tyrosine phosphatase, receptor type 9                        | Igsf11   | immunoglobulin superfamily, member 11                      |
| Ptpro    | protein tyrosine phosphatase, non-receptor type 6                    | Il17rd   | interleukin 17 receptor D                                  |
| Ptprz1   | protein tyrosine phosphatase, receptor type 8                        | Il1rap   | interleukin 1 receptor accessory protein                   |
| Ramp3    | receptor (calcitonin) activity modifying factor 3                    | Insr     | insulin receptor                                           |
| Rara     | retinoic acid receptor, alpha                                        | Irs1     | insulin receptor substrate 1                               |
| Rarb     | retinoic acid receptor, beta                                         | Itga2    | integrin alpha 2                                           |
| Ret      | ret proto-oncogene                                                   | Itga6    | integrin alpha 6                                           |
| Rhbdf1   | rhomboid family 1 (Drosophila)                                       | Lcor     | ligand dependent nuclear receptor corepressor              |
| Rpsa     | predicted gene 9323; predicted gene 9324                             | Lpar3    | lysophosphatidic acid receptor 3                           |
| Rtn4rl1  | reticulon 4 receptor-like 1                                          | Lrp11    | low density lipoprotein receptor-related protein 11        |
| Scarb1   | scavenger receptor class B, member 1                                 | Lrp12    | low density lipoprotein-related protein 12                 |
| Scarb2   | scavenger receptor class B, member 2                                 | Lrp8     | low density lipoprotein receptor-related protein 8         |
| Sigmar1  | sigma non-opioid intracellular receptor 1                            | Lsr      | lipolysis stimulated lipoprotein receptor                  |
| Slc7a1   | solute carrier family 7 (cationic amino acid transporters), member 7 | Mfsd6    | major facilitator superfamily domain containing 6          |
| Slitrk2  | SLIT and NTRK-like family, member 2                                  | Mmd2     | monocyte to macrophage differentiation factor 2            |
| Sort1    | sortilin 1                                                           | Ms4a15   | membrane-spanning 4-domain class A subfamily 15 member     |
| Srprb    | signal recognition particle receptor, beta                           | Mtvr2    | mammary tumor virus receptor 2                             |
| Strap    | serine/threonine kinase receptor associated protein                  | Neto2    | neuropilin (NRP) and tolloid (Tolloid) domain containing 2 |
| Sv2c     | synaptic vesicle glycoprotein 2c                                     | Ngfr     | nerve growth factor receptor (low molecular weight)        |
| Tlr3     | toll-like receptor 3                                                 | Notch1   | Notch gene homolog 1 (Drosophila)                          |
| Tmem123  | transmembrane protein 123                                            | Npc1     | Niemann Pick type C1                                       |
| Tnfrsf21 | tumor necrosis factor receptor superfamily member 21                 | Npy2r    | neuropeptide Y receptor Y2                                 |
| Traf4    | TNF receptor associated factor 4                                     | Nr1d2    | nuclear receptor subfamily 1, group 2, member 2            |
|          |                                                                      | Nr2c1    | nuclear receptor subfamily 2, group 1, member 1            |
|          |                                                                      | Nr2c2    | nuclear receptor subfamily 2, group 2, member 2            |
|          |                                                                      | Nr6a1    | nuclear receptor subfamily 6, group 1, member 1            |
|          |                                                                      | Olfr1015 | olfactory receptor 1015                                    |
|          |                                                                      | Olfr1045 | olfactory receptor 1045                                    |
|          |                                                                      | Olfr105  | olfactory receptor 105                                     |
|          |                                                                      | Olfr1157 | olfactory receptor 1157                                    |
|          |                                                                      | Olfr123  | olfactory receptor 123                                     |
|          |                                                                      | Olfr1262 | olfactory receptor 1262                                    |
|          |                                                                      | Olfr1318 | olfactory receptor 1318                                    |
|          |                                                                      | Olfr1392 | olfactory receptor 1392                                    |
|          |                                                                      | Olfr1402 | olfactory receptor 1402                                    |
|          |                                                                      | Olfr1416 | olfactory receptor 1416                                    |
|          |                                                                      | Olfr161  | olfactory receptor 161                                     |
|          |                                                                      | Olfr382  | olfactory receptor 382                                     |
|          |                                                                      | Olfr39   | olfactory receptor 39                                      |
|          |                                                                      | Olfr420  | olfactory receptor 420                                     |
|          |                                                                      | Olfr50   | olfactory receptor 50                                      |
|          |                                                                      | Olfr521  | olfactory receptor 521                                     |

|  |  |          |                                  |
|--|--|----------|----------------------------------|
|  |  | Olfr63   | olfactory receptor 63            |
|  |  | Olfr66   | similar to MOR 5beta1; olfacto   |
|  |  | Olfr695  | olfactory receptor 695           |
|  |  | Olfr824  | olfactory receptor 824           |
|  |  | Olfr914  | olfactory receptor 914           |
|  |  | Olfr958  | olfactory receptor 958           |
|  |  | Olfr963  | olfactory receptor 963           |
|  |  | Opn1mw   | opsin 1 (cone pigments), med     |
|  |  | Opn3     | opsin 3                          |
|  |  | Oprl1    | opioid receptor-like 1           |
|  |  | Oprm1    | opioid receptor, mu 1            |
|  |  | P2rx3    | purinergic receptor P2X, ligand  |
|  |  | P2rx7    | purinergic receptor P2X, ligand  |
|  |  | Paqr3    | progesterin and adipoQ receptor  |
|  |  | Pcdha10  |                                  |
|  |  | Pgrmc1   | progesterone receptor membr      |
|  |  | Phb2     | prohibitin 2                     |
|  |  | Plxna2   | plexin A2                        |
|  |  | Plxna3   | plexin A3                        |
|  |  | Plxna4   | plexin A4                        |
|  |  | Plxnb1   | plexin B1                        |
|  |  | Plxnb3   | plexin B3                        |
|  |  | Pnrc1    | proline-rich nuclear receptor c  |
|  |  | Prokr2   | prokineticin receptor 2          |
|  |  | Ptpn1    | protein tyrosine phosphatase,    |
|  |  | Ptpn12   | protein tyrosine phosphatase,    |
|  |  | Ptpn9    | protein tyrosine phosphatase,    |
|  |  | Ptprj    | protein tyrosine phosphatase,    |
|  |  | Ptprm    | protein tyrosine phosphatase,    |
|  |  | Ptprn    | protein tyrosine phosphatase,    |
|  |  | Ptprn2   | protein tyrosine phosphatase,    |
|  |  | Ptpro    | protein tyrosine phosphatase,    |
|  |  | Ptprr    | protein tyrosine phosphatase,    |
|  |  | Ptprz1   | protein tyrosine phosphatase,    |
|  |  | Ramp3    | receptor (calcitonin) activity m |
|  |  | Rara     | retinoic acid receptor, alpha    |
|  |  | Rarb     | retinoic acid receptor, beta     |
|  |  | Ret      | ret proto-oncogene               |
|  |  | Scarb2   | scavenger receptor class B, me   |
|  |  | Slc20a1  | solute carrier family 20, memb   |
|  |  | Slc22a17 | solute carrier family 22 (organi |
|  |  | Slitrk1  | SLIT and NTRK-like family, mer   |
|  |  | Slitrk2  | SLIT and NTRK-like family, mer   |
|  |  | Slitrk3  | SLIT and NTRK-like family, mer   |
|  |  | Sort1    | sortilin 1                       |
|  |  | Sra1     | steroid receptor RNA activator   |



|                          |                                         |                          |                                  |
|--------------------------|-----------------------------------------|--------------------------|----------------------------------|
|                          |                                         | Sstr1                    | somatostatin receptor 1          |
|                          |                                         | Sstr2                    | somatostatin receptor 2          |
|                          |                                         | Stab2                    | similar to FEX2; stabilin 2      |
|                          |                                         | Strap                    | serine/threonine kinase recept   |
|                          |                                         | Sv2c                     | synaptic vesicle glycoprotein 2  |
|                          |                                         | Tacr3                    | tachykinin receptor 3            |
|                          |                                         | Tgfbrap1                 | transforming growth factor, be   |
|                          |                                         | Tlr3                     | toll-like receptor 3             |
|                          |                                         | Tnfrsf21                 | tumor necrosis factor receptor   |
|                          |                                         | Tnfrsf8                  | tumor necrosis factor receptor   |
|                          |                                         | Traf4                    | TNF receptor associated factor   |
|                          |                                         | Trpc7                    | transient receptor potential ca  |
|                          |                                         | Trpm3                    | transient receptor potential ca  |
|                          |                                         | Tyro3                    | similar to Rse; TYRO3 protein t  |
|                          |                                         | Xpr1                     | xenotropic and polytropic retro  |
|                          |                                         |                          |                                  |
| <b>WntE11 vs CtrlE11</b> |                                         | <b>WntE15 vs CtrlE15</b> |                                  |
| <b>W11vsC11</b>          | <b>Fold Change &gt;1.2</b>              | <b>W15vsC15</b>          | <b>Fold Change &gt;1.2</b>       |
| Acvr1                    | activin A receptor, type 1              | Acvr1b                   | activin A receptor, type 1B      |
| Adcyap1r1                | adenylate cyclase activating polypept   | Acvr2a                   | activin receptor IIA             |
| Adrbk1                   | adrenergic receptor kinase, beta 1      | Adam22                   | a disintegrin and metallopeptic  |
| Agtr2                    | angiotensin II receptor, type 2         | Adcyap1r1                | adenylate cyclase activating po  |
| Ahr                      | aryl-hydrocarbon receptor               | Adra2a                   | adrenergic receptor, alpha 2a    |
| Alk                      | anaplastic lymphoma kinase              | Agtr1a                   | angiotensin II receptor, type 1a |
| Arntl                    | aryl hydrocarbon receptor nuclear tra   | Alk                      | anaplastic lymphoma kinase       |
| Bai1                     | brain-specific angiogenesis inhibitor 1 | Arntl                    | aryl hydrocarbon receptor nuc    |
| Bai3                     | brain-specific angiogenesis inhibitor 3 | Atrn                     | attractin                        |
| Celsr1                   | cadherin, EGF LAG seven-pass G-type     | Bai3                     | brain-specific angiogenesis inh  |
| Celsr2                   | cadherin, EGF LAG seven-pass G-type     | Bdkrb2                   | bradykinin receptor, beta 2      |
| Celsr3                   | cadherin, EGF LAG seven-pass G-type     | Bmpr1b                   | bone morphogenetic protein r     |
| Chrna3                   | cholinergic receptor, nicotinic, alpha  | Celsr2                   | cadherin, EGF LAG seven-pass     |
| Chrna4                   | cholinergic receptor, nicotinic, alpha  | Celsr3                   | cadherin, EGF LAG seven-pass     |
| Chrna5                   | cholinergic receptor, nicotinic, alpha  | Chrna3                   | cholinergic receptor, nicotinic, |
| Chrn2                    | cholinergic receptor, nicotinic, beta p | Chrna4                   | cholinergic receptor, nicotinic, |
| Chrn4                    | cholinergic receptor, nicotinic, beta p | Chrna5                   | cholinergic receptor, nicotinic, |
| Cnr1                     | cannabinoid receptor 1 (brain)          | Chrna7                   | cholinergic receptor, nicotinic, |
| Dcc                      | deleted in colorectal carcinoma         | Chrn2                    | cholinergic receptor, nicotinic, |
| Ddr1                     | discoidin domain receptor family, me    | Chrn4                    | cholinergic receptor, nicotinic, |
| Dear1                    | dual endothelin 1/angiotensin II rece   | Cnr1                     | cannabinoid receptor 1 (brain)   |
| Edaradd                  | EDAR (ectodysplasin-A receptor)-assoc   | Cxcr4                    | chemokine (C-X-C motif) recep    |
| Ednrb                    | endothelin receptor type B              | Darc                     | Duffy blood group, chemokine     |
| Epha3                    | Eph receptor A3                         | Dcc                      | deleted in colorectal carcinom   |
| Ephb2                    | Eph receptor B2                         | Ddr1                     | discoidin domain receptor fam    |
| Erbb3                    | v-erb-b2 erythroblastic leukemia viral  | Dear1                    | dual endothelin 1/angiotensin    |
| Fzd3                     | frizzled homolog 3 (Drosophila)         | Dner                     | delta/notch-like EGF-related re  |
| Gab1                     | growth factor receptor bound proteir    | Ednrb                    | endothelin receptor type B       |



|        |                                          |         |                                   |
|--------|------------------------------------------|---------|-----------------------------------|
| Gab2   | growth factor receptor bound protein     | Epha10  | Eph receptor A10                  |
| Gabra3 | gamma-aminobutyric acid (GABA) A r       | Epha5   | Eph receptor A5                   |
| Gabrb3 | gamma-aminobutyric acid (GABA) A r       | Epha6   | Eph receptor A6                   |
| Gabrg2 | gamma-aminobutyric acid (GABA) A r       | ErbB3   | v-erb-b2 erythroblastic leukemia  |
| Gfra1  | glial cell line derived neurotrophic fac | ErbB4   | v-erb-a erythroblastic leukemia   |
| Gfra2  | glial cell line derived neurotrophic fac | Ffar3   | free fatty acid receptor 3        |
| Gfra3  | glial cell line derived neurotrophic fac | Fpr-rs3 | formyl peptide receptor, relate   |
| Git1   | G protein-coupled receptor kinase-int    | Fzd3    | frizzled homolog 3 (Drosophila    |
| Gpr125 | G protein-coupled receptor 125           | Gab2    | growth factor receptor bound      |
| Gpr126 | G protein-coupled receptor 126           | Gabbr1  | gamma-aminobutyric acid (GA       |
| Gpr17  | G protein-coupled receptor 17            | Gabrb3  | gamma-aminobutyric acid (GA       |
| Gpr19  | G protein-coupled receptor 19            | Gabrg2  | gamma-aminobutyric acid (GA       |
| Gpr37  | G protein-coupled receptor 37            | Gabbr3  | gamma-aminobutyric acid (GA       |
| Gpr39  | G protein-coupled receptor 39            | Galr1   | galanin receptor 1                |
| Gprc5b | G protein-coupled receptor, family C,    | Galr2   | galanin receptor 2                |
| Grb10  | growth factor receptor bound protein     | Gfra1   | glial cell line derived neurotrop |
| Gria2  | glutamate receptor, ionotropic, AMP,     | Gfra2   | glial cell line derived neurotrop |
| Gria4  | glutamate receptor, ionotropic, AMP,     | Glp1r   | glucagon-like peptide 1 recept    |
| Grid2  | glutamate receptor, ionotropic, delta    | Gpr111  | G protein-coupled receptor 11     |
| Grik2  | glutamate receptor, ionotropic, kaina    | Gpr125  | G protein-coupled receptor 12     |
| Grik3  | glutamate receptor, ionotropic, kaina    | Gpr126  | G protein-coupled receptor 12     |
| Grk4   | G protein-coupled receptor kinase 4      | Gpr135  | G protein-coupled receptor 13     |
| Htr3b  | 5-hydroxytryptamine (serotonin) rece     | Gpr137c | G protein-coupled receptor 13     |
| Igf1r  | insulin-like growth factor I receptor    | Gpr155  | G protein-coupled receptor 15     |
| Igsf11 | immunoglobulin superfamily, membe        | Gpr156  | G protein-coupled receptor 15     |
| Il1rap | interleukin 1 receptor accessory prote   | Gpr158  | G protein-coupled receptor 15     |
| Il1rl2 | interleukin 1 receptor-like 2            | Gpr165  | G protein-coupled receptor 16     |
| Insr   | insulin receptor                         | Gpr17   | G protein-coupled receptor 17     |
| Itga4  | integrin alpha 4                         | Gpr173  | G-protein coupled receptor 17     |
| Itga6  | integrin alpha 6                         | Gpr19   | G protein-coupled receptor 19     |
| Itgav  | integrin alpha V                         | Gpr22   | G protein-coupled receptor 22     |
| Jmjd6  | jumonji domain containing 6              | Gpr37l1 | G protein-coupled receptor 37     |
| Lpar3  | lysophosphatidic acid receptor 3         | Gpr39   | G protein-coupled receptor 39     |
| Lrp11  | low density lipoprotein receptor-relat   | Gpr56   | G protein-coupled receptor 56     |
| Lrp4   | low density lipoprotein receptor-relat   | Gpr75   | G protein-coupled receptor 75     |
| Lrp5   | low density lipoprotein receptor-relat   | Gpr85   | G protein-coupled receptor 85     |
| Lrp8   | low density lipoprotein receptor-relat   | Gpr98   | G protein-coupled receptor 98     |
| Mfsd6  | major facilitator superfamily domain     | Grb14   | growth factor receptor bound      |
| Ngfr   | nerve growth factor receptor (TNFR s     | Gria1   | glutamate receptor, ionotropic    |
| Nisch  | nischarin                                | Gria2   | glutamate receptor, ionotropic    |
| Notch1 | Notch gene homolog 1 (Drosophila)        | Gria4   | glutamate receptor, ionotropic    |
| Notch2 | Notch gene homolog 2 (Drosophila)        | Grid1   | glutamate receptor, ionotropic    |
| Npr3   | natriuretic peptide receptor 3           | Grid2   | glutamate receptor, ionotropic    |
| Nr4a1  | nuclear receptor subfamily 4, group A    | Grik1   | glutamate receptor, ionotropic    |
| Nr4a2  | nuclear receptor subfamily 4, group A    | Grik2   | glutamate receptor, ionotropic    |
| Nrip1  | nuclear receptor interacting protein 1   | Grik3   | glutamate receptor, ionotropic    |

|          |                                         |          |                                   |
|----------|-----------------------------------------|----------|-----------------------------------|
| Nrp1     | neuropilin 1                            | Grik5    | glutamate receptor, ionotropic    |
| Ogfr     | opioid growth factor receptor           | Grin1    | glutamate receptor, ionotropic    |
| Olfr847  | olfactory receptor 847                  | Grin2b   | glutamate receptor, ionotropic    |
| Olfr908  | olfactory receptor 908                  | Grif1    | glucocorticoid receptor DNA b     |
| P2rx4    | purinergic receptor P2X, ligand-gated   | Grm1     | similar to metabotropic glutam    |
| Phb2     | prohibitin 2                            | Grm7     | glutamate receptor, metabotro     |
| Plxna4   | plexin A4                               | Htr2b    | 5-hydroxytryptamine (seroton      |
| Plxnb1   | plexin B1                               | Htr3a    | 5-hydroxytryptamine (seroton      |
| Ptpn1    | protein tyrosine phosphatase, non-re    | Htr3b    | 5-hydroxytryptamine (seroton      |
| Ptpn9    | protein tyrosine phosphatase, non-re    | Htr4     | 5 hydroxytryptamine (seroton      |
| Ptprf    | protein tyrosine phosphatase, recept    | Igf1r    | insulin-like growth factor I rece |
| Ptprj    | protein tyrosine phosphatase, recept    | Igsf11   | immunoglobulin superfamily, r     |
| Ptprm    | protein tyrosine phosphatase, recept    | Il17rd   | interleukin 17 receptor D         |
| Ptprn    | protein tyrosine phosphatase, recept    | Il17rd   | interleukin 17 receptor D         |
| Ptpro    | protein tyrosine phosphatase, non-re    | Il1rap   | interleukin 1 receptor accesso    |
| Ptprz1   | protein tyrosine phosphatase, recept    | Il1rapl1 | interleukin 1 receptor accesso    |
| Ramp3    | receptor (calcitonin) activity modifyin | Insr     | insulin receptor                  |
| Rara     | retinoic acid receptor, alpha           | Itga2    | integrin alpha 2                  |
| Rarb     | retinoic acid receptor, beta            | Itga6    | integrin alpha 6                  |
| Ret      | ret proto-oncogene                      | Lcor     | ligand dependent nuclear rece     |
| Rhbdf1   | rhomboid family 1 (Drosophila)          | Lmbr1l   | limb region 1 like                |
| Rtn4rl1  | reticulon 4 receptor-like 1             | Lpar3    | lysophosphatidic acid receptor    |
| Rxra     | retinoid X receptor alpha; similar to r | Lpar4    | lysophosphatidic acid receptor    |
| Rxrg     | retinoid X receptor gamma               | Lphn1    | latrophilin 1                     |
| Scarb2   | scavenger receptor class B, member 2    | Lrp11    | low density lipoprotein recepto   |
| Sigmar1  | sigma non-opioid intracellular recept   | Lrp1b    | low density lipoprotein-related   |
| Slc7a1   | solute carrier family 7 (cationic amin  | Lrp8     | low density lipoprotein recepto   |
| Slitrk2  | SLIT and NTRK-like family, member 2     | Ltk      | leukocyte tyrosine kinase         |
| Sort1    | sortilin 1                              | Mfsd6    | major facilitator superfamily de  |
| Sstr2    | somatostatin receptor 2                 | Mmd2     | monocyte to macrophage diffe      |
| Sv2c     | synaptic vesicle glycoprotein 2c        | Mrgpre   | MAS-related GPR, member E         |
| Tgfbrap1 | transforming growth factor, beta rece   | Mrgprg   | MAS-related GPR, member G         |
| Tlr3     | toll-like receptor 3                    | Myh7b    | myosin, heavy chain 7B, cardia    |
| Tmem123  | transmembrane protein 123               | Neto2    | neuropilin (NRP) and tolloid (T   |
| Tnfrsf21 | tumor necrosis factor receptor super    | Ngfr     | nerve growth factor receptor (    |
| Traf4    | TNF receptor associated factor 4        | Npy1r    | neuropeptide Y receptor Y1        |
|          |                                         | Npy2r    | neuropeptide Y receptor Y2        |
|          |                                         | Npy5r    | neuropeptide Y receptor Y5        |
|          |                                         | Nr1d2    | nuclear receptor subfamily 1, g   |
|          |                                         | Nr2c1    | nuclear receptor subfamily 2, g   |
|          |                                         | Nr2c2    | nuclear receptor subfamily 2, g   |
|          |                                         | Nr6a1    | nuclear receptor subfamily 6, g   |
|          |                                         | Olfr1043 | olfactory receptor 1043           |
|          |                                         | Olfr1157 | olfactory receptor 1157           |
|          |                                         | Olfr1272 | olfactory receptor 1273; olfact   |
|          |                                         | Olfr1349 | olfactory receptor 1349           |

|  |  |          |                                  |
|--|--|----------|----------------------------------|
|  |  | Olfr1382 | olfactory receptor 1382          |
|  |  | Olfr1389 | olfactory receptor 1389          |
|  |  | Olfr288  | olfactory receptor 288; olfacto  |
|  |  | Olfr39   | olfactory receptor 39            |
|  |  | Olfr503  | olfactory receptor 503; olfacto  |
|  |  | Olfr521  | olfactory receptor 521           |
|  |  | Olfr60   | olfactory receptor 60            |
|  |  | Olfr63   | olfactory receptor 63            |
|  |  | Olfr695  | olfactory receptor 695           |
|  |  | Olfr78   | olfactory receptor 78            |
|  |  | Olfr914  | olfactory receptor 914           |
|  |  | Olfr963  | olfactory receptor 963           |
|  |  | Olfr967  | olfactory receptor 967           |
|  |  | Olfr975  | olfactory receptor 975           |
|  |  | Oprl1    | opioid receptor-like 1           |
|  |  | Oprm1    | opioid receptor, mu 1            |
|  |  | Oxtr     | oxytocin receptor                |
|  |  | P2rx3    | purinergic receptor P2X, ligand  |
|  |  | Paqr3    | progesterin and adipoQ receptor  |
|  |  | Paqr9    | progesterin and adipoQ receptor  |
|  |  | Pcdha10  |                                  |
|  |  | Pgr      | progesterone receptor            |
|  |  | Pgrmc1   | progesterone receptor membr      |
|  |  | Plxna2   | plexin A2                        |
|  |  | Plxna3   | plexin A3                        |
|  |  | Plxna4   | plexin A4                        |
|  |  | Plxnb1   | plexin B1                        |
|  |  | Plxnb3   | plexin B3                        |
|  |  | Ppyr1    | pancreatic polypeptide recepto   |
|  |  | Prokr2   | prokineticin receptor 2          |
|  |  | Pth2r    | parathyroid hormone 2 recepto    |
|  |  | Ptpn1    | protein tyrosine phosphatase,    |
|  |  | Ptpn12   | protein tyrosine phosphatase,    |
|  |  | Ptpn3    | protein tyrosine phosphatase,    |
|  |  | Ptpn9    | protein tyrosine phosphatase,    |
|  |  | Ptprg    | protein tyrosine phosphatase,    |
|  |  | Ptprj    | protein tyrosine phosphatase,    |
|  |  | Ptprm    | protein tyrosine phosphatase,    |
|  |  | Ptprn    | protein tyrosine phosphatase,    |
|  |  | Ptprn2   | protein tyrosine phosphatase,    |
|  |  | Ptpro    | protein tyrosine phosphatase,    |
|  |  | Ptprr    | protein tyrosine phosphatase,    |
|  |  | Ptprs    | protein tyrosine phosphatase,    |
|  |  | Ptprz1   | protein tyrosine phosphatase,    |
|  |  | Ramp3    | receptor (calcitonin) activity m |
|  |  | Rarb     | retinoic acid receptor, beta     |

|  |          |                                   |
|--|----------|-----------------------------------|
|  | Ret      | ret proto-oncogene                |
|  | Rrh      | retinal pigment epithelium der    |
|  | Scarb2   | scavenger receptor class B, me    |
|  | Slc20a1  | solute carrier family 20, memb    |
|  | Slitrk1  | SLIT and NTRK-like family, mer    |
|  | Slitrk2  | SLIT and NTRK-like family, mer    |
|  | Slitrk3  | SLIT and NTRK-like family, mer    |
|  | Sorl1    | similar to sortilin-related recep |
|  | Sort1    | sortilin 1                        |
|  | Sstr1    | somatostatin receptor 1           |
|  | Sstr2    | somatostatin receptor 2           |
|  | Stra6    | stimulated by retinoic acid gen   |
|  | Sv2a     | synaptic vesicle glycoprotein 2   |
|  | Sv2c     | synaptic vesicle glycoprotein 2   |
|  | Taar1    | trace amine-associated recepto    |
|  | Taar2    | trace amine-associated recepto    |
|  | Tacr3    | tachykinin receptor 3             |
|  | Tas2r134 | taste receptor, type 2, membe     |
|  | Tnfrsf21 | tumor necrosis factor receptor    |
|  | Traf4    | TNF receptor associated factor    |
|  | Trpc6    | transient receptor potential ca   |
|  | Trpc7    | transient receptor potential ca   |
|  | Trpm3    | transient receptor potential ca   |
|  | Tyro3    | similar to Rse; TYRO3 protein t   |
|  | Unc5a    | unc-5 homolog A (C. elegans)      |
|  | Unc5d    | unc-5 homolog D (C. elegans)      |
|  | Vmn2r81  | vomer nasal 2, receptor 81; vo    |
|  | Xpr1     | xenotropic and polytropic retr    |
