# Supplementary material for: Transcription and Signaling Regulators in Developing Neuronal Subtypes of Mouse and Human Enteric Nervous System
Source: PubMed Central journal article supplement (PMC6381388; doi:10.1053/j.gastro.2017.10.005), 2018-02
Supplement: mmc16.pdf [file mmc16.pdf]

**SUPPLEMENTARY TABLE 6.**  
**Transcription factors in the developing ENS**

| Gene:                             | Online ISH resources:                 | IHC:                                    | Current screen:                                      | Reference/Comment:                                              |
|-----------------------------------|---------------------------------------|-----------------------------------------|------------------------------------------------------|-----------------------------------------------------------------|
| <i>Alx1*</i>                      | N/D                                   | In the ENS<br>Fig. 2A, 3A;<br>S3, 4     | W11vsC11                                             |                                                                 |
| <i>Arntl*</i>                     | Few ENS cells, E14<br>S2              |                                         | W11vsC11<br>S15vsW15<br>>2,4                         |                                                                 |
| <i>Ascl1</i><br>( <i>Mash1</i> )  | ENS E11-15                            |                                         | W11vsC11<br>W15vsC15                                 | In ENS, well-studied <sup>1, 2</sup>                            |
| <i>Atoh1*</i><br>( <i>Math1</i> ) | Few ENS cells<br>E15, S2              |                                         | S11vsC11<br>S15vsC15                                 | Comment: Function in other system <sup>3</sup>                  |
| <i>Cux1*</i>                      | N/D                                   | In the ENS<br>Fig. 2A,C; S3, 4          | S15vsS11                                             |                                                                 |
| <i>Cux2*</i>                      | ENS E13-15<br>S2                      |                                         | S15vsC15<br>S15vsS11                                 | Comment: Function in other neural crest derivative <sup>4</sup> |
| <i>Dlx1</i>                       | ENS E14                               |                                         | S11vsC11<br>S15vsC15                                 | In the ENS <sup>5</sup>                                         |
| <i>Dlx2</i>                       | ENS E11-15                            |                                         | S11vsC11<br>S15vsC15                                 | In the ENS <sup>5</sup>                                         |
| <i>Dlx3*</i>                      | ENS E14<br>S2                         |                                         | W15vsC15                                             |                                                                 |
| <i>Dlx5</i>                       | ENS E14<br>S2                         |                                         | S11vsC11<br>S15vsC15                                 | ENS transcriptome <sup>6</sup>                                  |
| <i>Dlx6</i>                       | ENS E14<br>S2                         |                                         | W11vsC11<br>W15vsC15                                 | ENS transcriptome <sup>7</sup>                                  |
| <i>Dmrta1*</i>                    | N/D                                   |                                         | W11vsC11<br>S15vsC15<br>W15vsC15<br>S15vsC15<br>>1,5 |                                                                 |
| <i>Ebf1*</i>                      | N/D                                   | In the ENS<br>Fig. 2A, 3B, C;<br>S3, 4  | W15vsW11                                             |                                                                 |
| <i>Ebf3</i>                       | ENS E15                               | In the ENS<br>Fig. 2A, 3B;<br>S3, 4     | W15vsW11<br>S11vsC11<br>S15vsC15                     | In the ENS <sup>8</sup>                                         |
| <i>Ebf4*</i>                      | ENS E14<br>S2                         |                                         | S15vsS11<br>W15vsW11                                 |                                                                 |
| <i>Egr1</i>                       | N/D                                   |                                         | S15vsS11                                             | In the ENS <sup>7</sup>                                         |
| <i>Etv1 (Er81)</i>                | ENS E15                               | In the ENS<br>Fig. 2A,C, 3B,C;<br>S3, 4 | W15vsW11<br>W15vsC15<br>W15vsS15                     | In the ENS <sup>8</sup>                                         |
| <i>Etv5*</i><br>( <i>Erm</i> )    | ENS E13-15<br>S2                      |                                         | W11vsC11<br>W11vsW15<br>S15vsW15                     |                                                                 |
| <i>Foxd1*</i>                     | Many bowel cells, incl. ENS<br>E11-14 | In the ENS<br>Fig. 2A, 3B;<br>S3, 4     | W11vsS11<br>W11vsW15<br>W11vsC11                     | Comment: Function in CNS <sup>9</sup>                           |
| <i>Foxd3</i>                      | ENS E11-13                            |                                         | S15vsW15<br>S11vsC11                                 | In the ENS <sup>7, 10</sup>                                     |

|                        |                                               |                                                |                                               |                                                                  |
|------------------------|-----------------------------------------------|------------------------------------------------|-----------------------------------------------|------------------------------------------------------------------|
| <b><i>Foxj2*</i></b>   | Few ENS cells, E13-15<br><b>S2</b>            |                                                | S15vsS11<br>W15vsW11                          |                                                                  |
| <b><i>Foxj3*</i></b>   | Few ENS cells, E15<br><b>S2</b>               |                                                | S15vsS11                                      |                                                                  |
| <b><i>Foxn2*</i></b>   | Few ENS cells, E14-15<br><b>S2</b>            |                                                | S15vsW15<br>S11vsC11<br>S15vsC15              |                                                                  |
| <b><i>Foxn3*</i></b>   | Few ENS cells, E15<br><b>S2</b>               |                                                | W15vsW11                                      |                                                                  |
| <b><i>Foxo1</i></b>    | Few ENS cells<br>E15, <b>S2</b>               |                                                | S15vsW15<br>S15vsS11                          | ENS progenitors <i>in vitro</i> <sup>11</sup>                    |
| <b><i>Foxo3</i></b>    | Few ENS cells<br>E15, <b>S2</b>               |                                                | S15vsS11                                      | ENS progenitors <i>in vitro</i> <sup>11</sup>                    |
| <b><i>Gatad2a*</i></b> | ENS E14<br><b>S2</b>                          |                                                | W11vsW15<br>S11vsS15                          |                                                                  |
| <b><i>Glis2*</i></b>   | Many gut cells,<br>incl. ENS E14<br><b>S2</b> |                                                | W11vsC11<br>S11vsC11<br>W11vsW15<br>>1,4      |                                                                  |
| <b><i>Hand2</i></b>    | N/D                                           |                                                | W11vsC11<br>W15vsC15                          | In the ENS, well-studied <sup>12</sup>                           |
| <b><i>Hdx*</i></b>     | N/D                                           | <b>In the ENS<br/>Fig. 2A, 3A;<br/>S3, 4</b>   | S11vsW11<br>S15vsC15<br>W15vsC15              |                                                                  |
| <b><i>Hlf*</i></b>     | Few ENS cells<br>E15, <b>S2</b>               |                                                | W15vsW11<br>W15vsS15                          |                                                                  |
| <b><i>Hmx1*</i></b>    | N/D                                           | <b>In the ENS<br/>Fig. 2A, 3B;<br/>S3, 4</b>   | W11vsW15                                      | Comment: Function in other neural crest derivative <sup>13</sup> |
| <b><i>Hmx2*</i></b>    | Few ENS cells<br>E13-15, <b>S2</b>            |                                                | S15vsC15                                      |                                                                  |
| <b><i>Hmx3</i></b>     | Few ENS cells<br>E15                          |                                                | S15vsC15                                      | In the ENS <sup>8</sup>                                          |
| <b><i>Homez*</i></b>   | ENS E13-15<br><b>S2</b>                       |                                                | W11vsW15                                      |                                                                  |
| <b><i>Hoxa1*</i></b>   | N/D                                           |                                                | S11vsS15<br>S15vsW15<br>W15vsC15<br>>1,35-1,5 |                                                                  |
| <b><i>Hoxa2*</i></b>   | ENS E14-15<br><b>S2</b>                       |                                                | W15vsC15                                      |                                                                  |
| <b><i>Hoxa3*</i></b>   | N/D                                           | <b>In the ENS<br/>Fig. 2A,E, 3A;<br/>S3, 4</b> | W15vsC15                                      |                                                                  |
| <b><i>Hoxa4*</i></b>   | E14<br><b>S2</b>                              |                                                | W15vsC15<br>W15vsW11<br>S15vsC15              |                                                                  |
| <b><i>Hoxa5</i></b>    | ENS E14                                       |                                                | W15vsC15                                      | In the ENS <sup>7,8</sup>                                        |
| <b><i>Hoxb2*</i></b>   | ENS E11-15<br><b>Fig. 2D</b>                  |                                                | W11vsC11<br>W15vsC15                          |                                                                  |
| <b><i>Hoxb3</i></b>    | ENS E14-15                                    | <b>In the ENS<br/>Fig. 2A,E, 3A;<br/>S3, 4</b> | W11vsC11<br>W15vsC15                          | Hoxb3 enhancer traced in the ENS <sup>14</sup>                   |

|                      |                                           |                                                  |                                              |                                                                                      |
|----------------------|-------------------------------------------|--------------------------------------------------|----------------------------------------------|--------------------------------------------------------------------------------------|
| <b><i>Hoxb4*</i></b> | ENS E13-15<br><b>S2</b>                   |                                                  | W11vsC11<br>W15vsC15                         |                                                                                      |
| <b><i>Hoxb5</i></b>  | ENS, E11-15                               |                                                  | W15vsC15<br>W15vsW11<br>W15vsS15             | In the ENS <sup>15, 16</sup><br>HSCR locus                                           |
| <b><i>Hoxb6</i></b>  | Few ENS cells<br>E14-15<br><b>Fig. 2D</b> |                                                  | W15vsC15<br>W15vsW11<br>W15vsS15             | ENS transcriptome <sup>8</sup>                                                       |
| <b><i>Hoxb8*</i></b> | Few ENS cells<br>E14-15<br><b>Fig. 2D</b> |                                                  | W15vsW11                                     |                                                                                      |
| <b><i>Hoxc4*</i></b> | N/D                                       | <b>In the ENS<br/>Fig. 2A,E;<br/>S3, 4</b>       | W15vsC15<br>W15vsS15<br>W15vsW11             |                                                                                      |
| <b><i>Hoxc5*</i></b> | N/D                                       | <b>In the ENS<br/>Fig. 2A,E; S3, 4</b>           | W15vsW11                                     |                                                                                      |
| <b><i>Hoxd1*</i></b> | E15<br><b>S2</b>                          |                                                  | S11vsC11<br>W15vsC15<br>S15vsC15             |                                                                                      |
| <b><i>Hoxd3*</i></b> | ENS, E14-15<br><b>Fig. 2D</b>             |                                                  | W11vsC11<br>W15vsW11                         |                                                                                      |
| <b><i>Hoxd4</i></b>  | ENS E11-15                                |                                                  | W15vsW11                                     | In the ENS <sup>15</sup>                                                             |
| <b><i>Jarid2</i></b> | ENS E14<br><b>S2</b>                      |                                                  | W11vsC11<br>W15vsC15                         | ENS transcriptome <sup>8</sup>                                                       |
| <b><i>Jazf1*</i></b> | Few ENS cells<br>E15<br><b>S2</b>         |                                                  | W15vsC15<br>W15vsS15<br>S15vsC15<br>W15vsW11 |                                                                                      |
| <b><i>Klf6*</i></b>  | ENS E11-14<br><b>S2</b>                   |                                                  | S15vsS11<br>S11vsC11                         |                                                                                      |
| <b><i>Klf7</i></b>   | ENS E11-E15                               | <b>In the ENS<br/>Fig. 2A, 3A, C;<br/>S3, 4</b>  | W15vsS15<br>W15vsW11<br>W11vsC11             | ENS transcriptome <sup>8</sup><br>Comment: Function in<br>other system <sup>17</sup> |
| <b><i>Lbh*</i></b>   | ENS E11<br><b>S2</b>                      |                                                  | S11vsC11<br>W11vsC11<br>W11vsW15<br>>1,3-1,5 | Comment: Wnt signaling<br>pathway <sup>18</sup>                                      |
| <b><i>Lef1*</i></b>  | general gut<br>E11                        |                                                  | S11vsC11<br>S11vsS15<br>W11vsW15<br>>1,7-2,5 | Comment: Wnt signaling<br>pathway                                                    |
| <b><i>Mef2c*</i></b> | ENS E14                                   | <b>In the ENS<br/>Fig. 2A,C;<br/>S3, 4</b>       | S15vsW15<br>S15vsC15<br>S11vsC15             | Comment: Function in<br>CNS <sup>19</sup>                                            |
| <b><i>Meis2*</i></b> | General gut<br>incl.d ENS<br>E11-15       | <b>In the ENS<br/>Fig. 2A,C, 3B,C;<br/>S3, 4</b> | W11vsW15                                     |                                                                                      |
| <b><i>Myc*</i></b>   | ENS E14<br><b>S2</b>                      |                                                  | S15vsW15<br>S11vsC11<br>S11vsS15             | In the adult ENS <sup>20</sup>                                                       |
| <b><i>Mycn*</i></b>  | ENS E14<br><b>S2</b>                      |                                                  | S15vsC15<br>S11vsC11<br>S11vsS15             | Comment: Function in<br>CNS <sup>21</sup>                                            |
| <b><i>Myt1</i></b>   | Many ENS<br>cells E11-15                  |                                                  | S11vsC11<br>S15vsC15<br>W15vsW11             | In the ENS <sup>7</sup><br>Comment: Function in<br>CNS <sup>22</sup>                 |

|                 |                         |                                         |                                  |                                                                                                            |
|-----------------|-------------------------|-----------------------------------------|----------------------------------|------------------------------------------------------------------------------------------------------------|
| <b>Myt1l*</b>   | ENS E13-15<br>S2        |                                         | S11vsC11<br>S15vsC15<br>W15vsS15 | Comment: Function in<br>CNS <sup>22</sup>                                                                  |
| <b>Nr2f1</b>    | General gut<br>E11      |                                         | W11vsS11<br>S11vsS15<br>S15vsW15 | In the ENS <sup>23</sup>                                                                                   |
| <b>NeuroD1</b>  | N/D                     |                                         | W11vsW15<br>W11vsS11<br>C15vsW15 | In the ENS <sup>7</sup>                                                                                    |
| <b>NeuroD4*</b> | N/D                     | In the ENS<br>Fig. 2A, 3A;<br>S3, 4     | W11vsC11<br>W15vsC15<br>W11vsW15 |                                                                                                            |
| <b>Onecut2*</b> | ENS E13-15              | In the ENS<br>Fig. 2A, 3A;<br>S3, 4     | W15vsW11<br>W15vsS15<br>S11vsC11 | Comment: Function in<br>CNS <sup>24</sup>                                                                  |
| <b>Patz1*</b>   | ENS E13-15<br>S2        |                                         | W11vsW15<br>W15vsC15             |                                                                                                            |
| <b>Pax3*</b>    | N/D                     | In the ENS<br>Fig. 2A; S3, 4            | S11vsC11<br>W11vsC11             | Pax3 <sup>-/-</sup> mutant display<br>ENS defects Not<br>previously described in<br>the ENS. <sup>25</sup> |
| <b>Phox2a</b>   | ENS E11-15              |                                         | S15vsS11                         | In the ENS, well-studied <sup>26</sup>                                                                     |
| <b>Phox2b</b>   | ENS E11-15              |                                         | W11vsC11<br>W15vsC15             | In the ENS, well-studied <sup>26</sup>                                                                     |
| <b>Pbx2*</b>    | ENS E11-14<br>S2        |                                         | S11vsS15<br>W11vsW15             |                                                                                                            |
| <b>Pbx3</b>     | Few ENS cells<br>E13-15 | In the ENS<br>Fig. 2A, 3B;<br>S3, 4     | W15vsS15<br>W15vsW11<br>W15vsC15 | In the ENS <sup>27</sup>                                                                                   |
| <b>Pknox1*</b>  | ENS E15<br>S2           |                                         | S15vsS11<br>W15vsW11             |                                                                                                            |
| <b>Runx1*</b>   | ENS E13-15<br>S2        |                                         | W15vsW11                         | Comment:Function in<br>other neural crest<br>derivative <sup>28</sup>                                      |
| <b>Satb1</b>    | ENS E13-15              | In the ENS<br>Fig. 2A,C, 3B,C;<br>S3, 4 | S15vsS11<br>W11vsC11<br>W15vsC15 | ENS transcriptome <sup>8</sup>                                                                             |
| <b>Satb2*</b>   | ENS E15                 | In the ENS<br>Fig. 2A, 3B;<br>S3, 4     | S15vsS11<br>W15vsW11<br>W11vsS11 |                                                                                                            |
| <b>Sox2</b>     | ENS E11-15              |                                         | S11vsC11<br>S15vsC15             | In Sox10 <sup>+</sup> cells <sup>8, 29</sup>                                                               |
| <b>Sox4*</b>    | ENS E13-15              | In the ENS<br>Fig. 2A,D, 3A;<br>S3, 4   | W11vsC11<br>S11vsC11<br>W15vsC15 |                                                                                                            |
| <b>Sox5</b>     | ENS E11-15              | In the ENS<br>Fig. 2A,D;<br>S3, 4       | S11vsC11<br>W11vsW15<br>S15vsW15 | ENS transcriptome <sup>30</sup>                                                                            |
| <b>Sox6*</b>    | N/D                     | In the ENS<br>Fig. 2A,D, 3B,C,<br>4     | S15vsS11                         |                                                                                                            |
| <b>Sox8</b>     | ENS E11-15              |                                         | S11vsC11<br>S15vsC15             | In Sox10 <sup>+</sup> cells <sup>31</sup>                                                                  |
| <b>Sox9*</b>    | N/D                     | In the ENS<br>Fig. 2A,D, 3A;            | W11vsW15<br>S11vsS15             |                                                                                                            |

|                |                         | <b>S3, 4</b>                                   |                                              |                                                                        |
|----------------|-------------------------|------------------------------------------------|----------------------------------------------|------------------------------------------------------------------------|
| <b>Sox10</b>   | ENS E11-15              |                                                | S11vsC11<br>W11vsW15<br>S11vsW11             | In ENS progenitors <sup>32</sup>                                       |
| <b>Sox11*</b>  | ENS E13                 | <b>In the ENS<br/>Fig. 2A,D, 3A;<br/>S3, 4</b> | W15vsC15<br>S15vsC15                         |                                                                        |
| <b>St18</b>    | N/D                     |                                                | S15vsW15<br>S11vsC11<br>S15vsC15<br>>1,3-7,2 | ENS transcriptome <sup>30</sup><br>Function in CNS <sup>22</sup>       |
| <b>Tbx2</b>    | ENS E11-13<br><b>S2</b> |                                                | S11vsC11<br>S15vsC15                         | ENS transcriptome <sup>8</sup>                                         |
| <b>Tbx3</b>    | ENS E11-15              | <b>In the ENS<br/>Fig. 2A,C, 3A;<br/>S3, 4</b> | W15vsW11<br>W15vsC15<br>W11vsC11             | In the ENS <sup>7, 8</sup>                                             |
| <b>Tbx20*</b>  | ENS E11-15<br><b>S2</b> |                                                | S11vsC11<br>S15vsC15<br>S11vsS15<br>>1,6-1,8 | Comment: Function in<br>CNS differentiation <sup>33</sup>              |
| <b>Tcf4</b>    | ENS E11-15<br><b>S2</b> |                                                | W11vsC11<br>W15vsC15<br>W15vsW11             | ENS transcriptome <sup>8</sup> HSCR<br>locus <sup>34</sup>             |
| <b>Tcf7l2*</b> | ENS E15<br><b>S2</b>    |                                                | W15vsS15<br>S15vsS11                         |                                                                        |
| <b>Tcf12*</b>  | ENS E14<br><b>S2</b>    |                                                | S15vsC15                                     |                                                                        |
| <b>Tcf21</b>   | ENS E14<br><b>S2</b>    |                                                | S11vsS15<br>C15vsW15<br>C11vsW11             | ENS transcriptome <sup>8</sup>                                         |
| <b>Tcf25*</b>  | ENS E11-15<br><b>S2</b> |                                                | S11vsC11<br>W11vsC11                         |                                                                        |
| <b>Tlx2</b>    | ENS E11-15              |                                                | S15vsC15<br>W15vsC15                         | In the ENS, well-studied <sup>35</sup>                                 |
| <b>Tlx3*</b>   | ENS E13-15              | <b>In the ENS<br/>Fig. 2A, 3A;<br/>S3, 4</b>   | S15vsC15                                     | Comment: Function in<br>other neural crest<br>derivative <sup>13</sup> |
| <b>Tshz1*</b>  | ENS E11-15<br><b>S2</b> |                                                | S15vsS11<br>S11vsC11                         |                                                                        |
| <b>Tshz3*</b>  | N/D                     | <b>In the ENS<br/>Fig. 2A, 3B;<br/>S3, 4</b>   | W15vsS15<br>W15vsW11                         |                                                                        |
| <b>Zeb1*</b>   | N/D                     | <b>In the ENS<br/>Fig. 2A,C, 3A;<br/>S3, 4</b> | S15vsS11<br>W15vsW11                         |                                                                        |
| <b>Zeb2</b>    | ENS E11-15              |                                                | W11vsC11<br>S11vsC11<br>W11vsW15             | In ENS HSCR locus <sup>36, 37</sup>                                    |
| <b>Zfhx2*</b>  | ENS E13-15<br><b>S2</b> |                                                | W11vsC11<br>W15vsW11                         |                                                                        |
| <b>Zfhx4*</b>  | ENS E11-15              | <b>In the ENS<br/>Fig. 2A,C, 3A;<br/>S3, 4</b> | W15vsW11                                     |                                                                        |
| <b>Zfp7*</b>   | ENS E14<br><b>S2</b>    |                                                | W11vsC11<br>W15vsC15                         |                                                                        |
| <b>Zfp113*</b> | ENS E14                 |                                                | W15vsC15                                     |                                                                        |

|                 |                         |  |                                  |  |
|-----------------|-------------------------|--|----------------------------------|--|
|                 | <b>S2</b>               |  | S15vsC15                         |  |
| <b>Zfp184*</b>  | ENS E14<br><b>S2</b>    |  | W15vsC15<br>S15vsC15             |  |
| <b>Zfp191*</b>  | ENS E13-15<br><b>S2</b> |  | W11vsC11<br>W15vsC15<br>S15vsC15 |  |
| <b>Zfp462*</b>  | ENS E14<br><b>S2</b>    |  | W15vsC15<br>S15vsC15             |  |
| <b>Zfp647*</b>  | ENS E14<br><b>S2</b>    |  | W15vsC15<br>S15vsC15             |  |
| <b>Zfp689</b>   | ENS E14<br><b>S2</b>    |  | W11vsC11<br>W15vsC15             |  |
| <b>Zhx3*</b>    | ENS E14<br><b>S2</b>    |  | S15vsS11<br>W15vsW11             |  |
| <b>Zik1*</b>    | ENS E14<br><b>S2</b>    |  | W15vsC15<br>S15vsC15<br>S11vsS15 |  |
| <b>Zkscan1*</b> | ENS E15<br><b>S2</b>    |  | W11vsC11<br>W15vsC15             |  |

**Supplementary Table 6. Up-to date list of transcription factors identified in the developing ENS.**

\*: genes previously not described in the developing mouse ENS. Expression was confirmed by IHC and/or convincing staining in online expression resources (bold black text). Enrichment in enteric populations of >2 and/or significant enrichment in at least 3 enteric populations were also considered as validation when quality was suboptimal in Online Expression Resources. Online ISH Resources = Allen Brain Atlas and GenePaint. ISH= *In situ* Hybridisation; IHC= Immunohistochemistry; S: Supplementary Figure; N/D: no (or suboptimal) data.

**REFERENCES:**

1. Blaugrund E, Pham TD, Tennyson VM, et al. Distinct subpopulations of enteric neuronal progenitors defined by time of development, sympathoadrenal lineage markers and Mash-1-dependence. *Development* 1996;122:309-20.
2. Memic F, Knoflach V, Sadler R, et al. *Ascl1* Is Required for the Development of Specific Neuronal Subtypes in the Enteric Nervous System. *J Neurosci* 2016;36:4339-50.
3. Costa A, Powell LM, Lowell S, et al. *Atoh1* in sensory hair cell development: constraints and cofactors. *Semin Cell Dev Biol* 2017;65:60-68.
4. Bachy I, Franck MC, Li L, et al. The transcription factor *Cux2* marks development of an A-delta sublineage of TrkA sensory neurons. *Dev Biol* 2011;360:77-86.
5. Qiu M, Bulfone A, Martinez S, et al. Null mutation of *Dlx-2* results in abnormal morphogenesis of proximal first and second branchial arch derivatives and abnormal differentiation in the forebrain. *Genes Dev* 1995;9:2523-38.

6. **Iwashita T, Kruger GM**, Pardal R, et al. Hirschsprung disease is linked to defects in neural crest stem cell function. *Science* 2003;301:972-6.
7. Vohra BP, Tsuji K, Nagashimada M, et al. Differential gene expression and functional analysis implicate novel mechanisms in enteric nervous system precursor migration and neurogenesis. *Dev Biol* 2006;298:259-71.
8. Heanue TA, Pachnis V. Expression profiling the developing mammalian enteric nervous system identifies marker and candidate Hirschsprung disease genes. *Proc Natl Acad Sci U S A* 2006;103:6919-24.
9. Takahashi H, Sakuta H, Shintani T, et al. Functional mode of FoxD1/CBF2 for the establishment of temporal retinal specificity in the developing chick retina. *Dev Biol* 2009;331:300-10.
10. Mundell NA, Plank JL, LeGrone AW, et al. Enteric nervous system specific deletion of Foxd3 disrupts glial cell differentiation and activates compensatory enteric progenitors. *Dev Biol* 2012;363:373-87.
11. Srinivasan S, Anitha M, Mwangi S, et al. Enteric neuroblasts require the phosphatidylinositol 3-kinase/Akt/Forkhead pathway for GDNF-stimulated survival. *Mol Cell Neurosci* 2005;29:107-19.
12. Lei J, Howard MJ. Targeted deletion of Hand2 in enteric neural precursor cells affects its functions in neurogenesis, neurotransmitter specification and gangliogenesis, causing functional aganglionosis. *Development* 2011;138:4789-800.
13. Furlan A, Lubke M, Adameyko I, et al. The transcription factor Hmx1 and growth factor receptor activities control sympathetic neurons diversification. *EMBO J* 2013;32:1613-25.
14. **Chan KK, Chen YS**, Yau TO, et al. Hoxb3 vagal neural crest-specific enhancer element for controlling enteric nervous system development. *Dev Dyn* 2005;233:473-83.
15. Gaunt SJ, Krumlauf R, Duboule D. Mouse homeo-genes within a subfamily, Hox-1.4, -2.6 and -5.1, display similar anteroposterior domains of expression in the embryo, but show stage- and tissue-dependent differences in their regulation. *Development* 1989;107:131-41.
16. Pitera JE, Smith VV, Thorogood P, et al. Coordinated expression of 3' hox genes during murine embryonal gut development: an enteric Hox code. *Gastroenterology* 1999;117:1339-51.
17. Laub F, Dragomir C, Ramirez F. Mice without transcription factor KLF7 provide new insight into olfactory bulb development. *Brain Res* 2006;1103:108-13.
18. Rieger ME, Sims AH, Coats ER, et al. The embryonic transcription cofactor LBH is a direct target of the Wnt signaling pathway in epithelial development and in aggressive basal subtype breast cancers. *Mol Cell Biol* 2010;30:4267-79.
19. **Li H, Radford JC**, Ragusa MJ, et al. Transcription factor MEF2C influences neural stem/progenitor cell differentiation and maturation in vivo. *Proc Natl Acad Sci U S A* 2008;105:9397-402.
20. Parr EJ, Gibson AW, Sharkey KA. c-Myc antigens in the mammalian enteric nervous system. *Neuroscience* 1994;58:807-16.
21. Xue XY, Harris WA. Using myc genes to search for stem cells in the ciliary margin of the *Xenopus* retina. *Dev Neurobiol* 2012;72:475-90.

22. Kameyama T, Matsushita F, Kadokawa Y, et al. Myt/NZF family transcription factors regulate neuronal differentiation of P19 cells. *Neurosci Lett* 2011;497:74-9.
23. Bergeron KF, Nguyen CM, Cardinal T, et al. Upregulation of the Nr2f1-A830082K12Rik gene pair in murine neural crest cells results in a complex phenotype reminiscent of Waardenburg syndrome type 4. *Dis Model Mech* 2016;9:1283-1293.
24. Espana A, Clotman F. Onecut factors control development of the Locus Coeruleus and of the mesencephalic trigeminal nucleus. *Mol Cell Neurosci* 2012;50:93-102.
25. Lang D, Chen F, Milewski R, et al. Pax3 is required for enteric ganglia formation and functions with Sox10 to modulate expression of c-ret. *J Clin Invest* 2000;106:963-71.
26. Young HM, Ciampoli D, Hsuan J, et al. Expression of Ret-, p75(NTR)-, Phox2a-, Phox2b-, and tyrosine hydroxylase-immunoreactivity by undifferentiated neural crest-derived cells and different classes of enteric neurons in the embryonic mouse gut. *Dev Dyn* 1999;216:137-52.
27. Di Giacomo G, Koss M, Capellini TD, et al. Spatio-temporal expression of Pbx3 during mouse organogenesis. *Gene Expr Patterns* 2006;6:747-57.
28. **Hadjab S, Franck MC**, Wang Y, et al. A local source of FGF initiates development of the unmyelinated lineage of sensory neurons. *J Neurosci* 2013;33:17656-66.
29. Heanue TA, Pachnis V. Prospective identification and isolation of enteric nervous system progenitors using Sox2. *Stem Cells* 2011;29:128-40.
30. Lasrado R, Boesmans W, Kleinjung J, et al. Lineage-dependent spatial and functional organization of the mammalian enteric nervous system. *Science* 2017;356:722-726.
31. Maka M, Stolt CC, Wegner M. Identification of Sox8 as a modifier gene in a mouse model of Hirschsprung disease reveals underlying molecular defect. *Dev Biol* 2005;277:155-69.
32. Southard-Smith EM, Kos L, Pavan WJ. Sox10 mutation disrupts neural crest development in Dom Hirschsprung mouse model. *Nat Genet* 1998;18:60-4.
33. Takeuchi JK, Mileikovskaia M, Koshiba-Takeuchi K, et al. Tbx20 dose-dependently regulates transcription factor networks required for mouse heart and motoneuron development. *Development* 2005;132:2463-74.
34. Jiang Q, Ho YY, Hao L, et al. Copy number variants in candidate genes are genetic modifiers of Hirschsprung disease. *PLoS One* 2011;6:e21219.
35. Shirasawa S, Yunker AM, Roth KA, et al. Enx (Hox11L1)-deficient mice develop myenteric neuronal hyperplasia and megacolon. *Nat Med* 1997;3:646-50.
36. Van de Putte T, Maruhashi M, Francis A, et al. Mice lacking ZFHX1B, the gene that codes for Smad-interacting protein-1, reveal a role for multiple neural crest cell defects in the etiology of Hirschsprung disease-mental retardation syndrome. *Am J Hum Genet* 2003;72:465-70.
37. **Watanabe Y, Stanchina L**, Lecerf L, et al. Differentiation of Mouse Enteric Nervous System Progenitor Cells Is Controlled by Endothelin 3 and Requires Regulation of Ednrb by SOX10 and ZEB2. *Gastroenterology* 2017;152:1139-1150 e4.



Author names in bold designate shared co-first authorship.
