# Supplementary material for: Transcription and Signaling Regulators in Developing Neuronal Subtypes of Mouse and Human Enteric Nervous System
Source: PubMed Central journal article supplement (PMC6381388; doi:10.1053/j.gastro.2017.10.005), 2018-02
Supplement: mmc17.pdf [file mmc17.pdf]

**SUPPLEMENTARY TABLE 7.**  
**Signaling pathways in the developing ENS**

| Gene:                                                                | Online ISH resources:                        | IHC:                                | Current screen:                  | Comment/References:                                                       |
|----------------------------------------------------------------------|----------------------------------------------|-------------------------------------|----------------------------------|---------------------------------------------------------------------------|
| <b>*Activin A signaling</b>                                          |                                              |                                     |                                  | Comment: Function in CNS <sup>1</sup>                                     |
| <i>Inhba</i> <sup>*</sup><br>(homodimerize to Activin A)             | mesenchyme<br>E11-13                         | In the ENS,<br>Fig 5B, 6;<br>S6     | C11vsW11<br>C15vsW15             |                                                                           |
| <i>Inha</i> <sup>*</sup><br>(heterodimer with INHBA to form Inhibin) | N/D                                          | In the ENS,<br>Fig 6; S6, 7         | W15vsC15<br>W15vsS15<br>W15vsW11 |                                                                           |
| <i>Acvr1b</i> <sup>*</sup><br>( <i>Alk4</i> )                        | ENS E14-15<br>Fig. 5B                        |                                     | W15vsC15<br>S15vsC15             |                                                                           |
| <i>Acvr2a</i> <sup>*</sup>                                           | ENS<br>E13-15                                | In the ENS,<br>Fig 5B, 6;<br>S6, 7  | W15vsC15<br>W15vsW11<br>S15vsC15 |                                                                           |
| <b>*ALK/LTK signaling</b>                                            |                                              |                                     |                                  | Comment: Function in neural crest <sup>2</sup>                            |
| <i>Alk</i>                                                           | ENS E15<br>S5                                |                                     | W15vsC15<br>W15vsS15<br>>2,5     | In bowel wall <sup>3</sup>                                                |
| <i>Ltk</i> <sup>*</sup>                                              | ENS E13-E15<br>Fig. 5C                       |                                     | W15vsC15<br>W15vsS15             |                                                                           |
| <b>*Aryl-hydrocarbon signaling</b>                                   |                                              |                                     |                                  | Comment: Function in CNS <sup>4</sup>                                     |
| <i>Ahr</i> <sup>*</sup>                                              | General gut<br>E14                           | In the ENS,<br>Fig. 5C, 6;<br>S6, 7 | W11vsC11<br>S15vsC15<br>S15vsS11 |                                                                           |
| <i>Arnt2</i> <sup>*</sup>                                            | ENS E13-15<br>S5                             |                                     | W15vsC15<br>S15vsC15             |                                                                           |
| <b>BMP signaling</b>                                                 |                                              |                                     |                                  | Well-studied in ENS <sup>5</sup>                                          |
| <i>Bmp1</i> <sup>*</sup>                                             | General gut<br>E13-15, S4                    |                                     | C15vsW15                         |                                                                           |
| <i>Bmp2</i>                                                          | mesenchyme<br>E14                            |                                     | C15vsW15                         | In bowel <sup>6</sup>                                                     |
| <i>Bmp4</i>                                                          | Serosa,<br>mesenchyme<br>E14                 |                                     | C11vsW11<br>C15svW15             | In bowel <sup>6</sup>                                                     |
| <i>Bmp5</i> <sup>*</sup>                                             | mesenchyme<br>E11-15, S5                     |                                     | C11vsW11<br>C15svW15             | In adult colon <sup>7</sup>                                               |
| <i>Bmp6</i> <sup>*</sup>                                             | mucosa E15<br>S5                             |                                     | C15vsW15                         |                                                                           |
| <i>Bmp7</i> <sup>*ENS</sup>                                          | ENS and<br>mucosa E15<br>Fig. 5B             |                                     | S11vsC11<br>S15vsC15<br>>2.3     | In chick mesenchyme <sup>8</sup><br>Comment: Function in CNS <sup>9</sup> |
| <i>Gdf6</i> <sup>*</sup><br>( <i>Bmp13</i> )                         | General gut,<br>close to ENS<br>E11-15<br>S5 |                                     | C11vsW11<br>C15vsW15             |                                                                           |

|                                                     |                                          |                                                          |                                              |                                                                                                                                                                               |
|-----------------------------------------------------|------------------------------------------|----------------------------------------------------------|----------------------------------------------|-------------------------------------------------------------------------------------------------------------------------------------------------------------------------------|
| <b><i>Gdf10*</i></b><br><b>(<i>Bmp3b</i>)</b>       | ENS and serosa<br>E13-15                 | <b>In the ENS</b><br><b>Fig. 5B, 6;</b><br><b>S6, 7</b>  | W11vsC11<br>C15vsW15                         | Comment: Function<br>in other system <sup>10</sup>                                                                                                                            |
| <b><i>Acvr1a*</i></b><br><b>(<i>Alk2</i>)</b>       | ENS<br>E15                               | <b>In the ENS,</b><br><b>Fig. 5B, 6;</b><br><b>S6, 7</b> | S11vsC11<br>S15vsS11                         |                                                                                                                                                                               |
| <b><i>Bmpr1b</i></b><br><b>(<i>Alk6</i>)</b>        | N/D                                      |                                                          | W15vsC15<br>W15vsW11<br>W15vsS15             | In ENS and<br>mesenchyme (RT-<br>PCR) <sup>6</sup>                                                                                                                            |
| <b><i>Acvr2a*</i></b>                               | ENS and<br>mucosa<br>E13-15              | <b>In the ENS,</b><br><b>Fig. 5B, 6;</b><br><b>S6, 7</b> | W15vsC15<br>S15vsC15                         |                                                                                                                                                                               |
| <b><i>Bmpr2</i></b>                                 | General gut<br>E11-15                    |                                                          | W15vsW11                                     | In ENS (RT-PCR) <sup>6</sup>                                                                                                                                                  |
| <b>*Chemokine<br/>signaling</b>                     |                                          |                                                          |                                              | Comment:<br>Function in CNS <sup>11-<br/>13</sup>                                                                                                                             |
| <b><i>Cxcl12*</i></b>                               | serosa and<br>mesenchyme<br>E11-E15      | <b>serosa and<br/>mucosa Fig.</b><br><b>5D, 6; S6, 7</b> | C15vsW15                                     |                                                                                                                                                                               |
| <b><i>Cxcr4*</i></b>                                | ENS<br>E11-E15                           | <b>In the ENS,</b><br><b>Fig. 5D, 6;</b><br><b>S6, 7</b> | W15vsC15<br>W15vsW11<br>W15vsS15             | <i>Cxcr4</i> <sup>-/-</sup> mutant<br>display ENS<br>migration defect <sup>14</sup><br>Not detected in<br>developing ENS<br>before, but in adult<br>ENS ganglia <sup>15</sup> |
| <b>*CCN family<br/>matricellular<br/>modulators</b> |                                          |                                                          |                                              | Comment: Function<br>in other systems <sup>16</sup>                                                                                                                           |
| <b><i>Ctgf (Ccn2)*</i></b>                          | ENS and<br>mucosa E13-<br>E15            | <b>In the ENS,</b><br><b>Fig. 5B, 6;</b><br><b>S6, 7</b> | S15vsC15<br>S15vsS11<br>S15vsW15             |                                                                                                                                                                               |
| <b><i>Ngfr</i> (p75)</b>                            | ENS<br>E11-E15                           |                                                          | W11vsC11<br>W15vsC15                         | In the ENS <sup>17</sup>                                                                                                                                                      |
| <b><i>Itga2</i></b>                                 | N/D                                      |                                                          | S15vsC15<br>S15vsS11<br>S15vsW15<br>>1,7-2,7 |                                                                                                                                                                               |
| <b>Endothelin<br/>signaling</b>                     |                                          |                                                          |                                              | Well-studied in<br>ENS <sup>18</sup>                                                                                                                                          |
| <b><i>Edn1*</i></b>                                 | mucosa E14<br><b>S5</b>                  |                                                          | C11vsW11                                     |                                                                                                                                                                               |
| <b><i>Edn3</i></b>                                  | mesenchyme<br>E14                        |                                                          | C11vsW11<br>C15vsW15                         | In gut<br>mesenchyme <sup>19</sup><br>HSCR locus <sup>20</sup>                                                                                                                |
| <b><i>Ednrb</i></b>                                 | ENS and<br>mesenchyme<br>E13-15          |                                                          | W11vsC11<br>W15vsC15                         | In the ENS <sup>21</sup><br>HSCR locus <sup>20</sup>                                                                                                                          |
| <b>*Eph/ephrin<br/>signaling</b>                    |                                          |                                                          |                                              | Comment: Function<br>in other systems <sup>22</sup>                                                                                                                           |
| <b><i>Efna1*</i></b>                                | mesenchyme<br>E11-15, <b>S4</b>          |                                                          | C15vsW15                                     |                                                                                                                                                                               |
| <b><i>Efna4*</i></b>                                | mesenchyme<br>mucosa E11-15<br><b>S4</b> |                                                          | W11vsW15                                     |                                                                                                                                                                               |

|                                                     |                                                 |                                              |                                              |                                                        |
|-----------------------------------------------------|-------------------------------------------------|----------------------------------------------|----------------------------------------------|--------------------------------------------------------|
| <b><i>Efna5*</i></b>                                | mesenchyme,<br>ENS E13-15<br><b>Fig. 5B</b>     |                                              | W15vsW11                                     |                                                        |
| <b><i>Efnb1*</i></b>                                | mesenchyme<br>E11-E14, <b>S5</b>                |                                              | C15vsW15                                     |                                                        |
| <b><i>Efnb2*</i></b>                                | mesenchyme<br>E11-15, <b>S5</b>                 |                                              | C11vsW11<br>C15vsS15                         |                                                        |
| <b><i>Efnb3*</i></b>                                | ENS E13-15<br><b>Fig. 5B</b>                    |                                              | W15vsC15<br>W15vsW11<br>W15vsS15             |                                                        |
| <b><i>Epha5*</i></b>                                | ENS E14-E15<br><b>Fig. 5B</b>                   |                                              | W15vsC15<br>W15vsW11<br>W15vsS15             |                                                        |
| <b><i>Epha6*</i></b>                                | N/D                                             |                                              | W15vsC15<br>W15vsW11<br>W15vsS15<br>>2.2-3.6 |                                                        |
| <b><i>Ephb2*</i></b>                                | ENS E14-15<br><b>Fig. 5B</b>                    |                                              | S11vsC11                                     |                                                        |
| <b>*FGF signaling</b>                               |                                                 |                                              |                                              | Comment: Function<br>in other system <sup>23, 24</sup> |
| <b><i>Fgf1*</i></b>                                 | General gut<br>E11-15                           | <b>In the ENS,<br/>Fig. 5B, 6;<br/>S6, 7</b> | W15vsW11                                     |                                                        |
| <b><i>Fgf7*</i></b>                                 | N/D                                             |                                              | S15vsW15<br>W11vsC11<br>S11vsC11<br>>1,5     |                                                        |
| <b><i>Fgf9</i></b>                                  | serosa and<br>mesenchyme<br>E11-14              |                                              | C11vsW11<br>C15vsW15                         | In gut<br>mesenchyme <sup>25</sup>                     |
| <b><i>Fgf10</i></b>                                 | Stomach and<br>hindgut<br>mesenchyme<br>E11-E15 |                                              | C11vsW11<br>C15vsW15                         | In gut<br>mesenchyme <sup>26</sup>                     |
| <b><i>Fgf13</i></b>                                 | ENS<br>E14                                      |                                              | W11vsC11<br>W15vsC15                         | In the ENS <sup>27, 28</sup>                           |
| <b><i>Ffgr1*</i></b>                                | serosa<br>mesenchyme<br>E11-15                  | <b>In the ENS,<br/>Fig. 5B, 6;<br/>S6, 7</b> | C15vsW15                                     |                                                        |
| <b><i>Fgfr2</i></b>                                 | bowel wall E14<br><b>S5</b>                     |                                              | C11vsW15<br>C15vsW15                         |                                                        |
| <b>*FLRT/UNC-5D<br/>signaling</b>                   |                                                 |                                              |                                              | Comment: Function<br>in CNS <sup>29, 30</sup>          |
| <b><i>Flrt1</i></b>                                 | Mesentery,<br>ENS? E14<br><b>S5</b>             |                                              | W15vsC15<br>S15vsS11<br>S15vsC15<br>>1,26    | ENS<br>transcriptome <sup>31</sup>                     |
| <b><i>Flrt2*</i></b>                                | mesenchyme<br>and ENS E14<br><b>Fig. 5B</b>     |                                              | W11vsW15<br>W15vsS15<br>>1,4                 |                                                        |
| <b><i>Flrt3*</i></b>                                | mesenchyme<br>E14, <b>S5</b>                    |                                              | C11vsW11<br>C15vsW15                         |                                                        |
| <b><i>Lphn1*</i><br/>(bind UNC-5D<br/>and FLRT)</b> | N/D                                             |                                              | W15vsC15<br>W15vsS15<br>W15vsW11             |                                                        |

|                               |                                           |                                                               |                                  |                                                     |
|-------------------------------|-------------------------------------------|---------------------------------------------------------------|----------------------------------|-----------------------------------------------------|
|                               |                                           |                                                               | >1,49                            |                                                     |
| <b><i>Unc5d*</i></b>          | Few ENS cells<br>E13-15<br><b>Fig. 5B</b> |                                                               | W15vsC15<br>W15vsS15<br>W15vsW11 |                                                     |
| <b>GDNF/Nrtn signaling</b>    |                                           |                                                               |                                  | Well-studied in ENS <sup>18</sup>                   |
| <b><i>Gdnf</i></b>            | mesenchyme<br>E11-15                      |                                                               | C11vsW11<br>C15vsW15             | In gut mesenchyme<br>HSCR locus <sup>32</sup>       |
| <b><i>Nrtn</i></b>            | mesenchyme<br>E14                         |                                                               | N/D                              | In the ENS <sup>33, 34</sup>                        |
| <b><i>Ret</i></b>             | ENS<br>E11-15                             |                                                               | W11vsC11<br>W15vsC15             | In the ENS<br>HSCR locus <sup>35</sup>              |
| <b><i>Gfra1</i></b>           | ENS and<br>mesenchyme<br>E11-15           |                                                               | W11vsC11<br>W15vsC15             | In the ENS <sup>36</sup>                            |
| <b><i>Gfra2</i></b>           | ENS and<br>mesenchyme<br>E13-15           |                                                               | W11vsC11<br>W15vsC15             | In the ENS <sup>37</sup>                            |
| <b>Hedgehog signaling</b>     |                                           |                                                               |                                  | Well-studied in ENS <sup>38</sup>                   |
| <b><i>Ihh</i></b>             | mucosa<br>E14                             |                                                               | N/D                              | In mucosa <sup>39</sup>                             |
| <b><i>Shh</i></b>             | mucosa<br>E11-15                          |                                                               | N/D                              | In mucosa <sup>39</sup>                             |
| <b><i>Dhh</i></b>             | N/D                                       |                                                               | S15vsC15                         | In Schwann-cell<br>derived ENS <sup>40</sup>        |
| <b><i>Ptch1</i></b>           | ENS and muscle<br>E11-14                  |                                                               | W11vsW15                         | In the ENS <sup>39</sup>                            |
| <b><i>Smo</i></b>             | general gut<br>E13                        |                                                               | W11vsW15                         | In the ENS <sup>41</sup>                            |
| <b><i>Gas1</i></b>            | serosa, muscle<br>and ENS E15             |                                                               | C15vsW15                         | In the ENS <sup>41</sup>                            |
| <b>*IGF/Insulin signaling</b> |                                           |                                                               |                                  | Comment: Function<br>in other systems <sup>42</sup> |
| <b><i>Igf1*</i></b>           | mesenchyme<br>E11-15                      | <b>Mesenchym<br/>e<br/>and ENS.<br/>Fig. 5B, 6;<br/>S6, 7</b> | C11vsW11<br>C15vsW15             | In adult ENS <sup>43</sup>                          |
| <b><i>Igf2*</i></b>           | mucosa and<br>serosa E11-15<br><b>S5</b>  |                                                               | C11vsW11<br>C15vsW15             |                                                     |
| <b><i>Igf1r*</i></b>          | mesenchyme<br>E11-15                      | <b>In the ENS,<br/>Fig. 5B, 6;<br/>S7</b>                     | W11vsC11<br>W15vsC15             | In adult ENS <sup>43</sup>                          |
| <b><i>Insr*</i></b>           | Few ENS cells<br>E13-E15, <b>S5</b>       |                                                               | W15vsC15                         |                                                     |
| <b>*Midkine signaling</b>     |                                           |                                                               |                                  | Comment: Function<br>in other systems <sup>44</sup> |
| <b><i>Ptn</i></b>             | Mesenchyme<br>E14                         |                                                               | C11vsW11<br>C15vsW15             | In mesenchyme <sup>45</sup>                         |
| <b><i>Mdk*</i></b>            | Mesenchyme<br>ENS? E14                    | <b>In the ENS,<br/>Fig. 5B, 6;<br/>S6, 7</b>                  | C11vsW11<br>C15vsW15<br>W11vsW15 |                                                     |
| <b><i>Ptprz1</i></b>          | ENS<br>E13-15                             |                                                               | W11vsC11<br>W15vsC15             | ENS                                                 |

|                                            |                                             |  |                                              |                                                                                       |
|--------------------------------------------|---------------------------------------------|--|----------------------------------------------|---------------------------------------------------------------------------------------|
|                                            | <b>S5</b>                                   |  | W15vsW11<br>>3-30                            | transcriptome <sup>31</sup>                                                           |
| <b><i>Itga4</i></b>                        | ENS<br>E11-14<br><b>S5</b>                  |  | W11vsC11<br>W11vsW15                         | In human iPS-<br>derived ENSCs <sup>31, 46</sup>                                      |
| <b><i>Itga6</i></b>                        | ENS and<br>mucosa E14<br><b>Fig. 5B</b>     |  | W11vsC11<br>W15vsC15<br>W11vsW15             | ENS<br>transcriptome <sup>31</sup>                                                    |
| <b><i>Cspg5</i></b><br><b>(<i>Ngc</i>)</b> | ENS E14?                                    |  | W11vsC11<br>W15vsC15<br>W15vsW11             | In the ENS <sup>47</sup>                                                              |
| <b>Netrin<br/>signaling</b>                |                                             |  |                                              | Studied in ENS <sup>18</sup>                                                          |
| <b><i>Ntn1</i></b>                         | mesenchyme<br>E13-15                        |  |                                              | In the ENS <sup>48</sup>                                                              |
| <b><i>Ntn3</i></b>                         | mesenchyme<br>E13-15                        |  |                                              | In the ENS <sup>48</sup>                                                              |
| <b><i>Ntn4*</i></b>                        | Few ENS cells<br>E15, <b>S5</b>             |  | W15vsC15<br>S15vsC15                         |                                                                                       |
| <b><i>Ntng1*</i></b>                       | ENS E13-15<br><b>Fig. 5C</b>                |  | W15vsC15<br>W15vsS15<br>W15vsW11             |                                                                                       |
| <b><i>Lrrc4c*</i></b>                      | N/D                                         |  | W11vsC11<br>W15vsC15<br>W15vsW11<br>>4-11    | Comment: Function<br>in CNS <sup>49</sup>                                             |
| <b><i>Unc5d*</i></b>                       | Few ENS cells<br>E13-15<br><b>Fig 5B</b>    |  | W15vsC15<br>W15vsS15<br>W15vsW11<br>>2       |                                                                                       |
| <b><i>Dscam</i></b>                        | N/D                                         |  | W11vsC11<br>W15vsC15<br>W15vsS15             | In the ENS, HSCR<br>locus <sup>50</sup>                                               |
| <b><i>Dcc</i></b>                          | N/D                                         |  | W11vsC11<br>W15vsC15<br>W15vsS15             | In the ENS <sup>51</sup>                                                              |
| <b>Neuregulin<br/>signaling</b>            |                                             |  |                                              | Studied in ENS <sup>18</sup>                                                          |
| <b><i>Nrg1</i><sup>*ENS</sup></b>          | ENS and<br>mesenchyme<br>E13-E15, <b>S5</b> |  | W15vsC15<br>W15vsS15                         | In mesenchyme <sup>52</sup><br>HSCR locus <sup>53</sup><br>In adult ENS <sup>54</sup> |
| <b><i>Nrg3</i><sup>*ENS</sup></b>          | N/D                                         |  | W15vsC11<br>S15vsC15<br>W15vsW11<br>>4.5-6.2 | HSCR locus <sup>55, 56</sup>                                                          |
| <b><i>ErbB3</i></b>                        | ENS<br>E13-15                               |  | W11vsC11<br>W15vsC15<br>S15vsW15             | In the ENS <sup>52</sup>                                                              |
| <b>Neurotrophin<br/>signaling</b>          |                                             |  |                                              | Well-studied in<br>ENS <sup>57</sup>                                                  |
| <b><i>Bdnf</i></b>                         | mesenchyme<br>E14                           |  | C11vsS11<br>C15vsS15                         | In the gut <sup>58</sup>                                                              |
| <b><i>Ntf3</i></b> ( <b><i>Nt3</i></b> )   | mesenchyme<br>E11-E15                       |  | C11vsW11<br>C15vsW15                         | In mesenchyme <sup>59</sup>                                                           |
| <b><i>Ntf5*</i></b> ( <b><i>Nt4</i></b> )  | General gut E14<br><b>S5</b>                |  | C15vsW15                                     |                                                                                       |

|                               |                                               |  |                                                |                                                        |
|-------------------------------|-----------------------------------------------|--|------------------------------------------------|--------------------------------------------------------|
| <b>Ngf*</b>                   | N/D                                           |  | C15vsW15<br>>2,5                               | In adult ENS <sup>60</sup>                             |
| <b>Ntrk2 (TrkB)</b>           | Few ENS cells?<br>E14                         |  |                                                | In the ENS (E16) <sup>61</sup>                         |
| <b>Ntrk3 (TrkC)</b>           | Mesenchyme<br>and ENS? E14                    |  | W15vsS15<br>W15vsW11                           | In the ENS <sup>59</sup>                               |
| <b>Ngfr (p75)</b>             | ENS E11-15                                    |  | W11vsC11<br>W15vsC15                           | In the ENS <sup>17</sup>                               |
| <b>Notch signaling</b>        |                                               |  |                                                | Studied in ENS <sup>62</sup>                           |
| <b>Dll1</b>                   | ENS<br>E11-E15                                |  | W11vsC11<br>W15vsC15                           | In the ENS, <sup>62</sup>                              |
| <b>Dll3</b>                   | N/D                                           |  | W15vsC15<br>S15vsW15<br>S11vsC11               | In the ENS <sup>62, 63</sup>                           |
| <b>Dll4</b>                   | N/D                                           |  | N/D                                            | In the ENS <sup>62</sup>                               |
| <b>Jag1</b>                   | mesenchyme,<br>ENS? E14                       |  | S15vsW15<br>W11vsW15<br>W15vsC15               | In the ENS <sup>62</sup>                               |
| <b>Notch1</b>                 | General gut incl.<br>ENS E11-15               |  | S11vsC11<br>S15vsC15                           | In the ENS <sup>62</sup>                               |
| <b>Notch2*</b>                | General gut incl.<br>ENS E11-E14<br><b>S5</b> |  | S11vsC11<br>S15vsS11<br>S15vsW15               |                                                        |
| <b>Notch4</b>                 | N/A                                           |  |                                                | In the ENS <sup>62</sup>                               |
| <b>Prokineticin signaling</b> |                                               |  |                                                | Studied in ENS <sup>64</sup>                           |
| <b>Prok-1</b>                 | N/D                                           |  | N/D                                            | In the<br>mesenchyme <sup>64</sup>                     |
| <b>Prokr1</b>                 | N/D                                           |  | W15vsS15<br>W15vsW11                           | In the ENS <sup>64</sup>                               |
| <b>RA signaling</b>           |                                               |  |                                                | Studied in ENS <sup>65</sup>                           |
| <b>Rara</b>                   | General gut incl.<br>ENS E11-14               |  | S11vsC11<br>S15vsC15                           | In the ENS <sup>65</sup>                               |
| <b>Rarb</b>                   | ENS<br>E15                                    |  | S11vsC11<br>W15vsC15                           | In the ENS <sup>27, 65</sup>                           |
| <b>Rarg</b>                   | General gut incl.<br>ENS E13-15               |  | N/D                                            | In the ENS <sup>65</sup>                               |
| <b>Rxra</b>                   | General gut incl.<br>ENS E11-15               |  | W11vsC11<br>C15vsW15                           | In the ENS <sup>65</sup>                               |
| <b>Rxrb</b>                   | General gut incl.<br>ENS E11-14               |  | N/D                                            | In the ENS <sup>65</sup>                               |
| <b>Rxrg</b>                   | General gut incl.<br>ENS E11-14               |  | W11vsW15                                       | In the ENS <sup>65</sup>                               |
| <b>Semaphorin signaling</b>   |                                               |  |                                                | Sema3 studied in<br>ENS <sup>66</sup>                  |
| <b>Sema3a</b>                 | mesenchyme<br>E11-15                          |  | C11vsW11<br>C15vsW15                           | In the bowel <sup>66</sup><br>HSCR locus <sup>67</sup> |
| <b>Sema3b*</b>                | mucosa and<br>ENS E14-E15<br><b>S5</b>        |  | W15vsC15<br>S11vsC11<br>S15vsC15<br>>1,25-1,45 |                                                        |
| <b>Sema3c</b>                 | mucosa and<br>ENS E11-15                      |  | S11vsW11<br>W15vsC15                           | In the ENS <sup>68</sup>                               |
| <b>Sema3d</b>                 | mesenchyme                                    |  | W11vsC11                                       | In the ENS <sup>68</sup>                               |

|                            |                                      |                                           |                                              |                                           |
|----------------------------|--------------------------------------|-------------------------------------------|----------------------------------------------|-------------------------------------------|
|                            | ENS E11-15                           |                                           | C15vsW15                                     |                                           |
| <b>Sema4d*</b>             | ENS E15<br><b>Fig 5B</b>             |                                           | W15vsC15<br>W15vsW11                         | Comment: Function in CNS <sup>69</sup>    |
| <b>Sema4f*</b>             | ENS E14<br><b>S5</b>                 |                                           | W15vsC15<br>W15vsW11<br>S15vsC15             |                                           |
| <b>Sema4g*</b>             | ENS E14<br><b>S5</b>                 |                                           | W15vsC15<br>W15vsS15                         |                                           |
| <b>Sema5a*</b>             | mesenchyme<br>E11-15, <b>S5</b>      |                                           | C11vsW11<br>C15vsW15                         |                                           |
| <b>Sema6a*</b>             | ENS E13-15<br><b>S5</b>              |                                           | W15vsW11<br>W15vsS15                         |                                           |
| <b>Sema6d*</b>             | mesenchyme<br>E11-15, <b>S5</b>      |                                           | C15vsW15<br>W15vsW11                         |                                           |
| <b>Plxna1</b>              | mesenchyme<br>E15                    |                                           | C15vsW15                                     | In the ENS <sup>68</sup>                  |
| <b>Plxna2</b>              | ENS E15                              |                                           | C11vsW11<br>W15vsC15                         | In the ENS <sup>68</sup>                  |
| <b>Plxna3</b>              | ENS E13-15                           |                                           | W15vsC15<br>W15vsS15                         | In the ENS <sup>68</sup>                  |
| <b>Plxna4</b>              | N/D                                  |                                           | W11vsC11<br>W15vsC15<br>W15vsS15<br>>4-9     | In the ENS <sup>68</sup>                  |
| <b>Plxnb1*</b>             | mesenchyme<br>and ENS E13-15         | <b>In the ENS,<br/>Fig. 5B, 6;<br/>S6</b> | W11vsC11<br>W15vsC15<br>W15vsW11             |                                           |
| <b>Plxnb3*</b>             | N/D                                  |                                           | W15vsC15<br>S15vsC15<br>W15vsW11<br>>1,3-1,5 |                                           |
| <b>Nrp1</b>                | ENS E11-15                           |                                           | W11vsC11<br>W11vsW15                         | In the ENS <sup>68</sup>                  |
| <b>Nrp2</b>                | ENS E14                              |                                           | W15vsW11                                     | In the ENS <sup>68</sup>                  |
| <b>L1cam (co-receptor)</b> | ENS E11-15                           |                                           | W11vsC11<br>W15vsS15                         | In the ENS <sup>66</sup>                  |
| <b>Nrcam (co-receptor)</b> | ENS E11-15                           |                                           | W11vsC11<br>W15vsC15                         | In the chick ENS <sup>70</sup>            |
| <b>Slit signaling</b>      |                                      |                                           |                                              | Studied in ENS <sup>71</sup>              |
| <b>Slit1</b>               | ENS and<br>mesenchyme<br>E14-15      |                                           | W15vsC15<br>W15vsW11                         | In the bowel wall <sup>71</sup>           |
| <b>Slit2</b>               | ENS and<br>mesenchyme<br>E14         |                                           | C11vsW11<br>W15vsW11                         | In the ENS <sup>71</sup>                  |
| <b>Slit3</b>               | ENS and<br>mesenchyme<br>E14         |                                           | W11vsC11<br>W15vsC15                         | In the bowel wall <sup>71</sup>           |
| <b>Robo2</b>               | mesenchyme,<br>hindgut mucosa<br>E14 |                                           | C11vsW11<br>C15vsW15<br>W15vsS15             | In chick ENS <sup>72</sup>                |
| <b>*Slitrk signaling</b>   |                                      |                                           |                                              | Comment: Function in CNS <sup>73-75</sup> |
| <b>Bdnf</b>                | mesenchyme<br>E14                    |                                           | C11vsS11<br>C15vsS15                         | Comment: Slitrk5 enhance TrkB             |

|                                     |                                                   |                                             |                                  |                                                       |
|-------------------------------------|---------------------------------------------------|---------------------------------------------|----------------------------------|-------------------------------------------------------|
|                                     | <b>S5</b>                                         |                                             |                                  | mediated signaling triggered by BDNF <sup>74</sup>    |
| <b><i>Ptprd*</i></b>                | mesenchyme and ENS<br><b>Fig 5B</b>               |                                             | C11vsW11<br>C15vsW15             |                                                       |
| <b><i>Ptpro*</i></b>                | ENS E14<br><b>S5</b>                              |                                             | W11vsC11<br>W15vsC15<br>W15vsS15 |                                                       |
| <b><i>Slitrk1*</i></b>              | ENS E13-15<br><b>S5</b>                           |                                             | W15vsC15                         |                                                       |
| <b><i>Slitrk2*</i></b>              | ENS?<br>E14                                       | <b>In the ENS<br/>Fig 6; S7</b>             | W11vsC11<br>W15vsC15             |                                                       |
| <b><i>Slitrk3*</i></b>              | ENS and mesenchyme,<br>E14                        | <b>In the ENS<br/>Fig. 5B, 6;<br/>S6, 7</b> | W15vsC15                         |                                                       |
| <b><i>Slitrk5*</i></b>              | whole gut incl.<br>ENS E14<br><b>S5</b>           |                                             | W15vsC15<br>W15vsW11             |                                                       |
| <b><i>Slitrk6</i></b>               | ENS and muscle<br>E14                             |                                             | W11vsC11<br>W15vsC15             | In the bowel wall <sup>76</sup>                       |
| <b>TGFβ signaling</b>               |                                                   |                                             |                                  | Comment: Function in CNS <sup>77</sup>                |
| <b><i>Tgfb1*</i></b>                | mesenchyme<br>E11-15, <b>S5</b>                   |                                             | C11vsW11<br>C15vsW15             |                                                       |
| <b><i>Tgfb2</i></b>                 | ENS E14-15                                        | <b>In the ENS<br/>Fig 5B, 6;<br/>S6, 7</b>  | W11vsC11<br>W15vsC15<br>S15vsS11 | In the ENS <sup>27</sup>                              |
| <b><i>Tgfb3*</i></b>                | serosa and mesenchyme<br>E14, <b>S5</b>           |                                             | C11vsW11<br>C15vsW15             |                                                       |
| <b><i>Tgibr1*</i></b>               | Gut wall and mucosa,<br>E14                       | <b>In the ENS;<br/>Fig 6; S6, 7</b>         |                                  |                                                       |
| <b><i>Tgibr2*</i></b>               | Gut wall<br>E14                                   | <b>In the ENS,<br/>Fig 5B, 6;<br/>S6, 7</b> | C15vsW15                         |                                                       |
| <b>Wnt signaling (canonical*)</b>   |                                                   |                                             |                                  | Non-canonical pathway is studied in ENS <sup>78</sup> |
| <b><i>Wnt2b*</i></b><br>(Canonical) | serosa and mesenchyme<br>E11-15<br><b>Fig. 5D</b> |                                             | C11vsW11<br>C15vsW15<br>W11vsW15 | In the adult gut <sup>79</sup>                        |
| <b><i>Wnt4</i></b>                  | Hindgut mucosa<br>E11-15                          |                                             | C11vsW11<br>C15vsW15             | In mucosa <sup>80</sup>                               |
| <b><i>Wnt5a</i></b>                 | mesenchyme<br>E11-15                              |                                             | C11vsW11<br>C15vsW15<br>W11vsW15 | In mesenchyme <sup>80</sup>                           |
| <b><i>Wnt5b</i></b>                 | mesenchyme<br>E13                                 |                                             | C11vsW11<br>C15vsW15             | In serosa <sup>80</sup>                               |
| <b><i>Wnt6</i></b>                  | Esophagus<br>E14                                  |                                             |                                  | In serosa <sup>80</sup>                               |
| <b><i>Wnt11</i></b>                 | Esophagus<br>E14                                  |                                             | C11vsW11                         | In mesenchyme <sup>80</sup>                           |
| <b><i>Lrp5*</i></b><br>(Canonical)  | ENS E11-14<br><b>Fig. 5D</b>                      |                                             | W11vsC11<br>S11vsC11             |                                                       |



|                                |                                     |                         |                                           |                                                                |
|--------------------------------|-------------------------------------|-------------------------|-------------------------------------------|----------------------------------------------------------------|
|                                |                                     |                         | S11vsS15                                  |                                                                |
| <b><i>Fzd3</i></b>             | ENS E11-15                          |                         | W11vsC11<br>W15vsC15                      | In the ENS <sup>78</sup>                                       |
| <b><i>Celsr2*</i></b>          | ENS E14-15<br><b>S5</b>             |                         | S11vsC11<br>S15vsC15                      | Comment: Function in non-canonical Wnt signaling <sup>81</sup> |
| <b><i>Celsr3</i></b>           | ENS 13-15                           |                         | S11vsC11<br>S15vsC15                      | In the ENS <sup>78</sup>                                       |
| <b>Receptors-Miscellaneous</b> |                                     |                         |                                           |                                                                |
| <b><i>Lrp8*</i></b>            | ENS E14, <b>S5</b>                  |                         | W15vsC15                                  |                                                                |
| <b><i>Lrp11*</i></b>           | ENS E15                             | <b>In the ENS S6, 7</b> | W15vsC15<br>S15vsS15                      |                                                                |
| <b><i>Ptprg*</i></b>           | N/D                                 |                         | W11vsC11<br>W15vsC15<br>W15vsS15<br>>1,45 |                                                                |
| <b><i>Ptprj*</i></b>           | N/D                                 |                         | S11vsC11<br>S15vsC15<br>S15vsW15<br>>1,5  |                                                                |
| <b><i>Ptprm*</i></b>           | Mesenchyme and ENS E14<br><b>S5</b> |                         | S11vsC11<br>S15vsW15                      |                                                                |
| <b><i>Ptprn*</i></b>           | ENS E14<br><b>S5</b>                |                         | W11vsC11<br>W15vsS15                      |                                                                |
| <b><i>Ptprn2*</i></b>          | N/D                                 |                         | W15vsC15<br>W15vsW15<br>W15vsS15<br>>1,8  |                                                                |
| <b><i>Ptprr*</i></b>           | N/D                                 |                         | W11vsC11<br>W15csS15<br>W15vsW11<br>>4,5  |                                                                |
| <b><i>Ptprs*</i></b>           | ENS E14<br><b>S5</b>                |                         | W15vsC15<br>W15vsW11                      |                                                                |

**Supplementary Table 7. Up-to-date list of signaling factors (ligands and receptors) identified in or around the developing ENS.**

Note that ligand-receptor interactions suggested in this table are based on experiments in other tissue.

\*: genes previously not described in the developing mouse ENS. Expression was confirmed by IHC and/or convincing staining in online expression resources (bold black text). Enrichment in enteric populations of >2 and/or significant enrichment in at least 3 enteric populations were also considered as validation when quality was suboptimal in Online Expression Resources. Online ISH Resources = Allen Brain Atlas and GenePaint. ISH= *In situ* Hybridisation; IHC= Immunohistochemistry; S: Supplementary Figure; N/D: no (or suboptimal) data; HSCR: Hirschsprung disease

## REFERENCES:

1. Davis AA, Matzuk MM, Reh TA. Activin A promotes progenitor differentiation into photoreceptors in rodent retina. *Mol Cell Neurosci* 2000;15:11-21.
2. Fadeev A, Krauss J, Singh AP, et al. Zebrafish Leucocyte tyrosine kinase controls iridophore establishment, proliferation and survival. *Pigment Cell Melanoma Res* 2016;29:284-96.
3. Vernersson E, Khoo NK, Henriksson ML, et al. Characterization of the expression of the ALK receptor tyrosine kinase in mice. *Gene Expr Patterns* 2006;6:448-61.
4. Dever DP, Adham ZO, Thompson B, et al. Aryl hydrocarbon receptor deletion in cerebellar granule neuron precursors impairs neurogenesis. *Dev Neurobiol* 2016;76:533-50.
5. Chalazonitis A, Kessler JA. Pleiotropic effects of the bone morphogenetic proteins on development of the enteric nervous system. *Dev Neurobiol* 2012;72:843-56.
6. Chalazonitis A, D'Autreaux F, Guha U, et al. Bone morphogenetic protein-2 and -4 limit the number of enteric neurons but promote development of a TrkC-expressing neurotrophin-3-dependent subset. *J Neurosci* 2004;24:4266-82.
7. Wu M, Chen W, Mi J, et al. Expression analysis of BMP2, BMP5, BMP10 in human colon tissues from Hirschsprung disease patients. *Int J Clin Exp Pathol* 2014;7:529-36.
8. Goldstein AM, Brewer KC, Doyle AM, et al. BMP signaling is necessary for neural crest cell migration and ganglion formation in the enteric nervous system. *Mech Dev* 2005;122:821-33.
9. Ohyama K, Ellis P, Kimura S, et al. Directed differentiation of neural cells to hypothalamic dopaminergic neurons. *Development* 2005;132:5185-97.
10. Li S, Nie EH, Yin Y, et al. GDF10 is a signal for axonal sprouting and functional recovery after stroke. *Nat Neurosci* 2015;18:1737-45.
11. Abe P, Molnar Z, Tzeng YS, et al. Intermediate Progenitors Facilitate Intracortical Progression of Thalamocortical Axons and Interneurons through CXCL12 Chemokine Signaling. *J Neurosci* 2015;35:13053-63.
12. Tiveron MC, Cremer H. CXCL12/CXCR4 signalling in neuronal cell migration. *Curr Opin Neurobiol* 2008;18:237-44.
13. Yang S, Edman LC, Sanchez-Alcaniz JA, et al. Cxcl12/Cxcr4 signaling controls the migration and process orientation of A9-A10 dopaminergic neurons. *Development* 2013;140:4554-64.
14. Nishiyama C, Uesaka T, Manabe T, et al. Trans-mesenteric neural crest cells are the principal source of the colonic enteric nervous system. *Nat Neurosci* 2012;15:1211-8.
15. Ding X, Zhao Z, Duan W, et al. Expression patterns of CXCR4 in different colon tissue segments of patients with Hirschsprung's disease. *Exp Mol Pathol* 2013;95:111-6.
16. Malik AR, Liszewska E, Jaworski J. Matricellular proteins of the Cyr61/CTGF/NOV (CCN) family and the nervous system. *Front Cell Neurosci* 2015;9:237.

17. Young HM, Ciampoli D, Hsuan J, et al. Expression of Ret-, p75(NTR)-, Phox2a-, Phox2b-, and tyrosine hydroxylase-immunoreactivity by undifferentiated neural crest-derived cells and different classes of enteric neurons in the embryonic mouse gut. *Dev Dyn* 1999;216:137-52.
18. Obermayr F, Hotta R, Enomoto H, et al. Development and developmental disorders of the enteric nervous system. *Nat Rev Gastroenterol Hepatol* 2013;10:43-57.
19. Leibl MA, Ota T, Woodward MN, et al. Expression of endothelin 3 by mesenchymal cells of embryonic mouse caecum. *Gut* 1999;44:246-52.
20. Kusafuka T, Puri P. Mutations of the endothelin-B receptor and endothelin-3 genes in Hirschsprung's disease. *Pediatr Surg Int* 1997;12:19-23.
21. Nataf V, Lecoin L, Eichmann A, et al. Endothelin-B receptor is expressed by neural crest cells in the avian embryo. *Proc Natl Acad Sci U S A* 1996;93:9645-50.
22. Cramer KS, Miko IJ. Eph-ephrin signaling in nervous system development. *F1000Res* 2016;5.
23. **Hadjab S, Franck MC**, Wang Y, et al. A local source of FGF initiates development of the unmyelinated lineage of sensory neurons. *J Neurosci* 2013;33:17656-66.
24. Raju R, Palapetta SM, Sandhya VK, et al. A Network Map of FGF-1/FGFR Signaling System. *J Signal Transduct* 2014;2014:962962.
25. Geske MJ, Zhang X, Patel KK, et al. Fgf9 signaling regulates small intestinal elongation and mesenchymal development. *Development* 2008;135:2959-68.
26. Zacchetti G, Duboule D, Zakany J. Hox gene function in vertebrate gut morphogenesis: the case of the caecum. *Development* 2007;134:3967-73.
27. Heanue TA, Pachnis V. Expression profiling the developing mammalian enteric nervous system identifies marker and candidate Hirschsprung disease genes. *Proc Natl Acad Sci U S A* 2006;103:6919-24.
28. Vohra BP, Tsuji K, Nagashimada M, et al. Differential gene expression and functional analysis implicate novel mechanisms in enteric nervous system precursor migration and neuritogenesis. *Dev Biol* 2006;298:259-71.
29. Jackson VA, Mehmood S, Chavent M, et al. Super-complexes of adhesion GPCRs and neural guidance receptors. *Nat Commun* 2016;7:11184.
30. **Yamagishi S, Hampel F**, Hata K, et al. FLRT2 and FLRT3 act as repulsive guidance cues for Unc5-positive neurons. *EMBO J* 2011;30:2920-33.
31. Lasrado R, Boesmans W, Kleinjung J, et al. Lineage-dependent spatial and functional organization of the mammalian enteric nervous system. *Science* 2017;356:722-726.
32. Sanchez MP, Silos-Santiago I, Frisen J, et al. Renal agenesis and the absence of enteric neurons in mice lacking GDNF. *Nature* 1996;382:70-3.
33. Heuckeroth RO, Enomoto H, Grider JR, et al. Gene targeting reveals a critical role for neurturin in the development and maintenance of enteric, sensory, and parasympathetic neurons. *Neuron* 1999;22:253-63.
34. Rossi J, Luukko K, Poteryaev D, et al. Retarded growth and deficits in the enteric and parasympathetic nervous system in mice lacking GFR alpha2, a functional neurturin receptor. *Neuron* 1999;22:243-52.

35. Schuchardt A, D'Agati V, Larsson-Blomberg L, et al. Defects in the kidney and enteric nervous system of mice lacking the tyrosine kinase receptor Ret. *Nature* 1994;367:380-3.
36. **Cacalano G, Farinas I, Wang LC**, et al. GFRalpha1 is an essential receptor component for GDNF in the developing nervous system and kidney. *Neuron* 1998;21:53-62.
37. Rossi J, Herzig KH, Voikar V, et al. Alimentary tract innervation deficits and dysfunction in mice lacking GDNF family receptor alpha2. *J Clin Invest* 2003;112:707-16.
38. Bondurand N, Southard-Smith EM. Mouse models of Hirschsprung disease and other developmental disorders of the enteric nervous system: Old and new players. *Dev Biol* 2016;417:139-57.
39. Ramalho-Santos M, Melton DA, McMahon AP. Hedgehog signals regulate multiple aspects of gastrointestinal development. *Development* 2000;127:2763-72.
40. Uesaka T, Nagashimada M, Enomoto H. Neuronal Differentiation in Schwann Cell Lineage Underlies Postnatal Neurogenesis in the Enteric Nervous System. *J Neurosci* 2015;35:9879-88.
41. Jin S, Martinelli DC, Zheng X, et al. Gas1 is a receptor for sonic hedgehog to repel enteric axons. *Proc Natl Acad Sci U S A* 2015;112:E73-80.
42. Liu J, Speder P, Brand AH. Control of brain development and homeostasis by local and systemic insulin signalling. *Diabetes Obes Metab* 2014;16 Suppl 1:16-20.
43. Zhang GQ, Yang S, Li XS, et al. Expression and possible role of IGF-IR in the mouse gastric myenteric plexus and smooth muscles. *Acta Histochem* 2014;116:788-94.
44. Xu C, Zhu S, Wu M, et al. Functional receptors and intracellular signal pathways of midkine (MK) and pleiotrophin (PTN). *Biol Pharm Bull* 2014;37:511-20.
45. Vanderwinden JM, Maillieux P, Schiffmann SN, et al. Cellular distribution of the new growth factor pleiotrophin (HB-GAM) mRNA in developing and adult rat tissues. *Anat Embryol (Berl)* 1992;186:387-406.
46. Fattahi F, Steinbeck JA, Kriks S, et al. Deriving human ENS lineages for cell therapy and drug discovery in Hirschsprung disease. *Nature* 2016;531:105-9.
47. Newgreen DF, Hartley L. Extracellular matrix and adhesive molecules in the early development of the gut and its innervation in normal and spotting lethal rat embryos. *Acta Anat (Basel)* 1995;154:243-60.
48. Ratcliffe EM, Fan L, Mohammed TJ, et al. Enteric neurons synthesize netrins and are essential for the development of the vagal sensory innervation of the fetal gut. *Dev Neurobiol* 2011;71:362-73.
49. **Woo J, Kwon SK**, Choi S, et al. Trans-synaptic adhesion between NGL-3 and LAR regulates the formation of excitatory synapses. *Nat Neurosci* 2009;12:428-37.
50. Jannot AS, Pelet A, Henrion-Caude A, et al. Chromosome 21 scan in Down syndrome reveals DSCAM as a predisposing locus in Hirschsprung disease. *PLoS One* 2013;8:e62519.

51. Seaman C, Anderson R, Emery B, et al. Localization of the netrin guidance receptor, DCC, in the developing peripheral and enteric nervous systems. *Mech Dev* 2001;103:173-5.
52. Chalazonitis A, D'Autreaux F, Pham TD, et al. Bone morphogenetic proteins regulate enteric gliogenesis by modulating ErbB3 signaling. *Dev Biol* 2011;350:64-79.
53. **Garcia-Barcelo MM, Tang CS**, Ngan ES, et al. Genome-wide association study identifies NRG1 as a susceptibility locus for Hirschsprung's disease. *Proc Natl Acad Sci U S A* 2009;106:2694-9.
54. Barrenschee M, Lange C, Cossais F, et al. Expression and function of Neuregulin 1 and its signaling system ERBB2/3 in the enteric nervous system. *Front Cell Neurosci* 2015;9:360.
55. **Tang CS, Cheng G, So MT**, et al. Genome-wide copy number analysis uncovers a new HSCR gene: NRG3. *PLoS Genet* 2012;8:e1002687.
56. Yang J, Duan S, Zhong R, et al. Exome sequencing identified NRG3 as a novel susceptible gene of Hirschsprung's disease in a Chinese population. *Mol Neurobiol* 2013;47:957-66.
57. Obermayr F, Stamp LA, Anderson CR, et al. Genetic fate-mapping of tyrosine hydroxylase-expressing cells in the enteric nervous system. *Neurogastroenterol Motil* 2013;25:e283-91.
58. Fox EA, Murphy MC. Factors regulating vagal sensory development: potential role in obesities of developmental origin. *Physiol Behav* 2008;94:90-104.
59. Chalazonitis A, Rothman TP, Chen J, et al. Neurotrophin-3 induces neural crest-derived cells from fetal rat gut to develop in vitro as neurons or glia. *J Neurosci* 1994;14:6571-84.
60. Lucini C, Maruccio L, de Girolamo P, et al. Localisation of neurotrophin - containing cells in higher vertebrate intestine. *Anat Embryol (Berl)* 2002;205:135-40.
61. **Levanti MB, Esteban I**, Ciriaco E, et al. Enteric glial cells express full-length TrkB and depend on TrkB expression for normal development. *Neurosci Lett* 2009;454:16-21.
62. Okamura Y, Saga Y. Notch signaling is required for the maintenance of enteric neural crest progenitors. *Development* 2008;135:3555-65.
63. Ngan ES, Garcia-Barcelo MM, Yip BH, et al. Hedgehog/Notch-induced premature gliogenesis represents a new disease mechanism for Hirschsprung disease in mice and humans. *J Clin Invest* 2011;121:3467-78.
64. Ngan ES, Lee KY, Sit FY, et al. Prokineticin-1 modulates proliferation and differentiation of enteric neural crest cells. *Biochim Biophys Acta* 2007;1773:536-45.
65. Sato Y, Heuckeroth RO. Retinoic acid regulates murine enteric nervous system precursor proliferation, enhances neuronal precursor differentiation, and reduces neurite growth in vitro. *Dev Biol* 2008;320:185-98.
66. Anderson RB, Bergner AJ, Taniguchi M, et al. Effects of different regions of the developing gut on the migration of enteric neural crest-derived cells: a role for *Sema3A*, but not *Sema3F*. *Dev Biol* 2007;305:287-99.

67. Wang LL, Zhang Y, Fan Y, et al. SEMA3A rs7804122 polymorphism is associated with Hirschsprung disease in the Northeastern region of China. *Birth Defects Res A Clin Mol Teratol* 2012;94:91-5.
68. **Jiang Q, Arnold S, Heanue T**, et al. Functional loss of semaphorin 3C and/or semaphorin 3D and their epistatic interaction with ret are critical to Hirschsprung disease liability. *Am J Hum Genet* 2015;96:581-96.
69. **Kuzirian MS, Moore AR**, Staudenmaier EK, et al. The class 4 semaphorin Sema4D promotes the rapid assembly of GABAergic synapses in rodent hippocampus. *J Neurosci* 2013;33:8961-73.
70. Krushel LA, Prieto AL, Cunningham BA, et al. Expression patterns of the cell adhesion molecule Nr-CAM during histogenesis of the chick nervous system. *Neuroscience* 1993;53:797-812.
71. Goldberg D, Borojevic R, Anderson M, et al. Slit/Robo-mediated chemorepulsion of vagal sensory axons in the fetal gut. *Dev Dyn* 2013;242:9-15.
72. **Zuhdi N, Ortega B, Giovannone D**, et al. Slit molecules prevent entrance of trunk neural crest cells in developing gut. *Int J Dev Neurosci* 2015;41:8-16.
73. **Beaubien F, Raja R**, Kennedy TE, et al. Slitrk1 is localized to excitatory synapses and promotes their development. *Sci Rep* 2016;6:27343.
74. Song M, Giza J, Proenca CC, et al. Slitrk5 Mediates BDNF-Dependent TrkB Receptor Trafficking and Signaling. *Dev Cell* 2015;33:690-702.
75. Takahashi H, Katayama K, Sohya K, et al. Selective control of inhibitory synapse development by Slitrk3-PTPdelta trans-synaptic interaction. *Nat Neurosci* 2012;15:389-98, S1-2.
76. Aruga J. Slitrk6 expression profile in the mouse embryo and its relationship to that of Nlrr3. *Gene Expr Patterns* 2003;3:727-33.
77. Dias JM, Alekseenko Z, Applequist JM, et al. Tgfbeta signaling regulates temporal neurogenesis and potency of neural stem cells in the CNS. *Neuron* 2014;84:927-39.
78. Sasselli V, Boesmans W, Vanden Berghe P, et al. Planar cell polarity genes control the connectivity of enteric neurons. *J Clin Invest* 2013;123:1763-72.
79. **Valenta T, Degirmenci B**, Moor AE, et al. Wnt Ligands Secreted by Subepithelial Mesenchymal Cells Are Essential for the Survival of Intestinal Stem Cells and Gut Homeostasis. *Cell Rep* 2016;15:911-8.
80. Lickert H, Kispert A, Kutsch S, et al. Expression patterns of Wnt genes in mouse gut development. *Mech Dev* 2001;105:181-4.
81. Qu Y, Huang Y, Feng J, et al. Genetic evidence that Celsr3 and Celsr2, together with Fzd3, regulate forebrain wiring in a Vangl-independent manner. *Proc Natl Acad Sci U S A* 2014;111:E2996-3004.

Author names in bold designate shared co-first authorship.
