# Supplementary material for: Transcription and Signaling Regulators in Developing Neuronal Subtypes of Mouse and Human Enteric Nervous System
Source: PubMed Central journal article supplement (PMC6381388; doi:10.1053/j.gastro.2017.10.005), 2018-02
Supplement: mmc18.pdf [file mmc18.pdf]

**SUPPLEMENTARY TABLE 8:  
ENS enriched genes associated with signaling pathways**

| Pathway Name                       | FGF                                                                                                                                                                                                                                                                                                                                                                                                                                                                                                                        | TGFb                                                                                                                                                                                                                                                            | Wnt                                                                                                                                                                                                                                                                                                                                                                                                                                                                                                                                         | Cxcr4                                                                                                                                      | Insulin/IGF                                                                                                                                    | Ephrin                                                                                                                                                                                                                                             |
|------------------------------------|----------------------------------------------------------------------------------------------------------------------------------------------------------------------------------------------------------------------------------------------------------------------------------------------------------------------------------------------------------------------------------------------------------------------------------------------------------------------------------------------------------------------------|-----------------------------------------------------------------------------------------------------------------------------------------------------------------------------------------------------------------------------------------------------------------|---------------------------------------------------------------------------------------------------------------------------------------------------------------------------------------------------------------------------------------------------------------------------------------------------------------------------------------------------------------------------------------------------------------------------------------------------------------------------------------------------------------------------------------------|--------------------------------------------------------------------------------------------------------------------------------------------|------------------------------------------------------------------------------------------------------------------------------------------------|----------------------------------------------------------------------------------------------------------------------------------------------------------------------------------------------------------------------------------------------------|
| <b>Comparison, Fold Enrichment</b> | W15vsC15;<br>1,25                                                                                                                                                                                                                                                                                                                                                                                                                                                                                                          | W15vsC15;<br>1,25                                                                                                                                                                                                                                               | W11vsC11;<br>1,25                                                                                                                                                                                                                                                                                                                                                                                                                                                                                                                           | W15vsC15;<br>1,25                                                                                                                          | W15vsC15;<br>1,25                                                                                                                              | W15vsC15;<br>1,25                                                                                                                                                                                                                                  |
| <b>Pathway ID</b>                  | Panther:<br>00021                                                                                                                                                                                                                                                                                                                                                                                                                                                                                                          | Panther:<br>00052                                                                                                                                                                                                                                               | Panther:<br>P00057                                                                                                                                                                                                                                                                                                                                                                                                                                                                                                                          | Biocarta:<br>Cxcr4<br>pathway                                                                                                              | Panther:<br>00033                                                                                                                              | Reactome:<br>2132295                                                                                                                                                                                                                               |
|                                    | <i>Hras1</i><br><i>Rasa2</i><br><i>Prkce</i><br><i>Fgf13</i><br><i>Fgf14</i><br><i>Mapk10</i><br><i>Mapk11</i><br><i>Mapk8</i><br><i>Map2k1</i><br><i>Map3k1</i><br><i>Pebp1</i><br><i>Pik3cb</i><br><i>Pik3c3</i><br><i>Prkca</i><br><i>Prkcb</i><br><i>Prkcz</i><br><i>Ppp2ca</i><br><i>Ppp2r2a</i><br><i>Ppp2r2b</i><br><i>Ppp2r2c</i><br><i>Ppp2r5b</i><br><i>Ppp2r5c</i><br><i>Nras</i><br><i>Sos1</i><br><i>Sos2</i><br><i>Spry3</i><br><i>Shc3</i><br><i>Syngap1</i><br><i>Akt3</i><br><i>Ywhag</i><br><i>Ywhaz</i> | <i>Fkbp1b</i><br><i>Skil</i><br><i>Atf2</i><br><i>Mapk10</i><br><i>Smad2</i><br><i>Dcp1b</i><br><i>Cited2</i><br><i>Bmp7</i><br><i>Hras1</i><br><i>Acvr1b</i><br><i>Acvr2a</i><br><i>Nras</i><br><i>Mapk8</i><br><i>Mapk11</i><br><i>Bmpr1b</i><br><i>Tgfb2</i> | <i>Gsk3b</i><br><i>Smarcd1</i><br><i>Smarcb1</i><br><i>Hdac3</i><br><i>Ctbp1</i><br><i>Lef1</i><br><i>Lrp5</i><br><i>Nlk</i><br><i>Prkcz</i><br><i>Celsr3</i><br><i>Nkd2</i><br><i>Cdh6</i><br><i>Gng3</i><br><i>Gng2</i><br><i>CCND1</i><br><i>Cdh2</i><br><i>Myc</i><br><i>Gna11</i><br><i>Dvl3</i><br><i>Cttnal1</i><br><i>Smad1</i><br><i>Fzd3</i><br><i>Kremen1</i><br><i>Ppp2r5b</i><br><i>Prkca</i><br><i>Smarca4</i><br><i>Plcb4</i><br><i>Mycn</i><br><i>Myh3</i><br><i>Cdh10</i><br><i>Gnaq</i><br><i>Csnk1g2</i><br><i>Cdh19</i> | <i>Hras</i><br><i>Ptk2</i><br><i>Cxcr4</i><br><i>Gnai1</i><br><i>Gnb1</i><br><i>Gnaq</i><br><i>Map2k1</i><br><i>Pik3r1</i><br><i>Prkcb</i> | <i>Foxo1</i><br><i>Gsk3b</i><br><i>Insr</i><br><i>Igf1r</i><br><i>Pik3r3</i><br><i>Pik3cb</i><br><i>Pik3r1</i><br><i>Pik3c3</i><br><i>Akt3</i> | <i>Actr1a</i><br><i>Sh3gl2</i><br><i>Ap2b1</i><br><i>Dctn3</i><br><i>Dnm3</i><br><i>Dync1h1</i><br><i>Dync1i2</i><br><i>Dynll2</i><br><i>Kif2a</i><br><i>Kif3a</i><br><i>Kif3b</i><br><i>Kif3c</i><br><i>Kif5a</i><br><i>Klc1</i><br><i>Kifap3</i> |
