# Supplementary material for: Transcription and Signaling Regulators in Developing Neuronal Subtypes of Mouse and Human Enteric Nervous System
Source: Gastroenterology. 2018 Feb;154(3):624–36. doi: 10.1053/j.gastro.2017.10.005 (PMC6381388; doi:10.1053/j.gastro.2017.10.005)
Supplement: Supplementary Table 2 [file mmc12.pdf]

**Supplementary Table 2: Enriched genes in pairwise comparisons between cell populations in the developing gut.**

Significant genes based on p-value <0.05 and 5% FDR (false discovery rate).

**W11 vs C11**

| Probeset ID | Gene Symbol   | RefSeq        | p-value      | Fold-change | Comparison                      |
|-------------|---------------|---------------|--------------|-------------|---------------------------------|
| 10593756    | Chrna3        | NM_145129     | 5.55267e-017 | 27.9817     | E11.5 * Wnt1 up vs E11.5 * Ctrl |
| 10357103    | Cdh19         | NM_001081386  | 1.478e-012   | 26.3844     | E11.5 * Wnt1 up vs E11.5 * Ctrl |
| 10547227    | Ret           | NM_001080780  | 1.3369e-015  | 21.7731     | E11.5 * Wnt1 up vs E11.5 * Ctrl |
| 10515095    | Elavl4        | NM_010488     | 3.13616e-015 | 18.2435     | E11.5 * Wnt1 up vs E11.5 * Ctrl |
| 10576332    | Tubb3         | NM_023279     | 9.43309e-012 | 17.4451     | E11.5 * Wnt1 up vs E11.5 * Ctrl |
| 10536667    | Ptprz1        | NM_001081306  | 3.3449e-015  | 16.5099     | E11.5 * Wnt1 up vs E11.5 * Ctrl |
| 10492169    | Mab21l1       | NM_010750     | 1.04657e-014 | 14.7884     | E11.5 * Wnt1 up vs E11.5 * Ctrl |
| 10470412    | Dbh           | NM_138942     | 3.27595e-014 | 14.6623     | E11.5 * Wnt1 up vs E11.5 * Ctrl |
| 10427862    | Cdh6          | NM_007666     | 5.92824e-016 | 13.9498     | E11.5 * Wnt1 up vs E11.5 * Ctrl |
| 10595033    | Scg3          | NM_009130     | 2.43695e-015 | 13.4743     | E11.5 * Wnt1 up vs E11.5 * Ctrl |
| 10431812    | Nell2         | NM_016743     | 8.29229e-015 | 13.3545     | E11.5 * Wnt1 up vs E11.5 * Ctrl |
| 10373467    | Erbb3         | NM_010153     | 8.6074e-013  | 13.069      | E11.5 * Wnt1 up vs E11.5 * Ctrl |
| 10345016    | Tcfap2b       | NM_001025305  | 4.44058e-013 | 11.5813     | E11.5 * Wnt1 up vs E11.5 * Ctrl |
| 10417628    | Cadps         | NM_012061     | 7.86276e-013 | 11.2763     | E11.5 * Wnt1 up vs E11.5 * Ctrl |
| 10523231    | Art3          | NM_181728     | 1.541e-014   | 10.9224     | E11.5 * Wnt1 up vs E11.5 * Ctrl |
| 10463737    | Ina           | AK144917      | 3.60861e-011 | 10.5517     | E11.5 * Wnt1 up vs E11.5 * Ctrl |
| 10431659    | Kif21a        | NM_001109040  | 2.70076e-015 | 10.425      | E11.5 * Wnt1 up vs E11.5 * Ctrl |
| 10522895    | Csn3          | NM_007786     | 1.44314e-011 | 10.1087     | E11.5 * Wnt1 up vs E11.5 * Ctrl |
| 10464471    | Gal           | NM_010253     | 3.05005e-010 | 10.0649     | E11.5 * Wnt1 up vs E11.5 * Ctrl |
| 10605113    | L1cam         | NM_008478     | 4.68031e-014 | 10.0402     | E11.5 * Wnt1 up vs E11.5 * Ctrl |
| 10543802    | Ptxna4        | NM_175750     | 2.31288e-014 | 9.95        | E11.5 * Wnt1 up vs E11.5 * Ctrl |
| 10432675    | I730030J21Rik | ENSMUST000001 | 1.07583e-008 | 9.37961     | E11.5 * Wnt1 up vs E11.5 * Ctrl |
| 10408798    | Tcfap2a       | NM_011547     | 3.40865e-013 | 9.34378     | E11.5 * Wnt1 up vs E11.5 * Ctrl |
| 10499431    | Syt11         | NM_018804     | 1.39618e-013 | 8.34575     | E11.5 * Wnt1 up vs E11.5 * Ctrl |
| 10428698    | Sntb1         | NM_016667     | 1.0835e-013  | 8.19512     | E11.5 * Wnt1 up vs E11.5 * Ctrl |
| 10490818    | Stmn2         | NM_025285     | 9.55378e-013 | 8.00188     | E11.5 * Wnt1 up vs E11.5 * Ctrl |
| 10593767    | Chrn4         | NM_148944     | 4.29952e-011 | 7.47835     | E11.5 * Wnt1 up vs E11.5 * Ctrl |
| 10575693    | Vat1l         | NM_173016     | 2.06623e-012 | 7.46626     | E11.5 * Wnt1 up vs E11.5 * Ctrl |
| 10464370    | Slc18a2       | NM_172523     | 6.44462e-013 | 7.34596     | E11.5 * Wnt1 up vs E11.5 * Ctrl |
| 10601888    | Plp1          | NM_011123     | 6.00784e-011 | 7.19343     | E11.5 * Wnt1 up vs E11.5 * Ctrl |
| 10597817    | Cck           | NM_031161     | 2.68205e-009 | 7.1758      | E11.5 * Wnt1 up vs E11.5 * Ctrl |
| 10402020    | Eml5          | NM_001081191  | 2.01826e-014 | 7.17219     | E11.5 * Wnt1 up vs E11.5 * Ctrl |
| 10531869    | Mapk10        | NM_009158     | 1.31669e-012 | 7.17041     | E11.5 * Wnt1 up vs E11.5 * Ctrl |
| 10372324    | Syt1          | NM_009306     | 5.0579e-011  | 7.02094     | E11.5 * Wnt1 up vs E11.5 * Ctrl |
| 10463732    | Ina           | NM_146100     | 1.42873e-014 | 7.00993     | E11.5 * Wnt1 up vs E11.5 * Ctrl |
| 10363224    | Fabp7         | NM_021272     | 2.20508e-012 | 6.99935     | E11.5 * Wnt1 up vs E11.5 * Ctrl |
| 10423243    | Cdh10         | NM_009865     | 9.1247e-011  | 6.96576     | E11.5 * Wnt1 up vs E11.5 * Ctrl |
| 10367982    | Gpr126        | NM_001002268  | 9.1402e-013  | 6.83879     | E11.5 * Wnt1 up vs E11.5 * Ctrl |
| 10422164    | Ednrb         | NM_007904     | 5.20127e-015 | 6.72604     | E11.5 * Wnt1 up vs E11.5 * Ctrl |
| 10540298    | Chl1          | NM_007697     | 6.05236e-013 | 6.60729     | E11.5 * Wnt1 up vs E11.5 * Ctrl |
| 10491477    | Sox2          | NM_011443     | 2.23254e-009 | 6.53277     | E11.5 * Wnt1 up vs E11.5 * Ctrl |
| 10439514    | Gap43         | NM_008083     | 5.08332e-014 | 6.51269     | E11.5 * Wnt1 up vs E11.5 * Ctrl |
| 10586591    | Car12         | NM_178396     | 4.50845e-012 | 6.40402     | E11.5 * Wnt1 up vs E11.5 * Ctrl |
| 10530306    | Phox2b        | NM_008888     | 8.2495e-012  | 6.39947     | E11.5 * Wnt1 up vs E11.5 * Ctrl |
| 10585484    | Chrna5        | NM_176844     | 3.13304e-011 | 6.22389     | E11.5 * Wnt1 up vs E11.5 * Ctrl |
| 10368175    | Pde7b         | NM_013875     | 2.02444e-011 | 6.21949     | E11.5 * Wnt1 up vs E11.5 * Ctrl |
| 10353192    | Eya1          | NM_010164     | 2.24493e-011 | 6.16516     | E11.5 * Wnt1 up vs E11.5 * Ctrl |
| 10458663    | Dpysl3        | NM_009468     | 1.85662e-013 | 6.08176     | E11.5 * Wnt1 up vs E11.5 * Ctrl |
| 10423836    | Cthrc1        | NM_026778     | 4.31932e-014 | 6.06502     | E11.5 * Wnt1 up vs E11.5 * Ctrl |
| 10514510    | Cyp2j6        | NM_010008     | 4.05356e-012 | 6.01521     | E11.5 * Wnt1 up vs E11.5 * Ctrl |
| 10508052    | Grik3         | NM_001081097  | 2.20636e-010 | 5.89643     | E11.5 * Wnt1 up vs E11.5 * Ctrl |
| 10416340    | Gfra2         | NM_008115     | 2.23752e-012 | 5.72119     | E11.5 * Wnt1 up vs E11.5 * Ctrl |
| 10605437    | Pls3          | NM_145629     | 3.43879e-013 | 5.67028     | E11.5 * Wnt1 up vs E11.5 * Ctrl |
| 10395553    | Nrcam         | NM_176930     | 3.40568e-012 | 5.55752     | E11.5 * Wnt1 up vs E11.5 * Ctrl |
| 10408629    | 1300014I06Rik | NM_025831     | 1.89085e-011 | 5.55653     | E11.5 * Wnt1 up vs E11.5 * Ctrl |
| 10494043    | Trdkh         | NM_028307     | 2.2442e-012  | 5.50841     | E11.5 * Wnt1 up vs E11.5 * Ctrl |
| 10362372    | 9330159F19Rik | BC138282      | 2.52885e-010 | 5.43481     | E11.5 * Wnt1 up vs E11.5 * Ctrl |
| 10584549    | Scn3b         | NM_178227     | 2.31646e-011 | 5.41251     | E11.5 * Wnt1 up vs E11.5 * Ctrl |
| 10368999    | Grik2         | NM_010349     | 9.8945e-012  | 5.39765     | E11.5 * Wnt1 up vs E11.5 * Ctrl |

|                        |              |              |         |                                 |
|------------------------|--------------|--------------|---------|---------------------------------|
| 10491136 Tnik          | BC137799     | 1.40255e-015 | 5.38032 | E11.5 * Wnt1 up vs E11.5 * Ctrl |
| 10400926 Rtn1          | NM_153457    | 5.51564e-011 | 5.18128 | E11.5 * Wnt1 up vs E11.5 * Ctrl |
| 10603151 Gpm6b         | NM_023122    | 6.43349e-014 | 5.0995  | E11.5 * Wnt1 up vs E11.5 * Ctrl |
| 10472809 Dlx1          | NM_010053    | 2.10539e-012 | 5.09389 | E11.5 * Wnt1 up vs E11.5 * Ctrl |
| 10569646 Ccnd1         | NM_007631    | 3.88396e-013 | 5.08293 | E11.5 * Wnt1 up vs E11.5 * Ctrl |
| 10498885 Gria2         | NM_013540    | 4.02994e-010 | 5.0327  | E11.5 * Wnt1 up vs E11.5 * Ctrl |
| 10522208 Uchl1         | NM_011670    | 1.69016e-009 | 5.0191  | E11.5 * Wnt1 up vs E11.5 * Ctrl |
| 10402708 Ckb           | NM_021273    | 7.8438e-011  | 4.99711 | E11.5 * Wnt1 up vs E11.5 * Ctrl |
| 10476512 Snap25        | NM_011428    | 6.36015e-012 | 4.98664 | E11.5 * Wnt1 up vs E11.5 * Ctrl |
| 10346882 Adam23        | NM_011780    | 3.76113e-011 | 4.96819 | E11.5 * Wnt1 up vs E11.5 * Ctrl |
| 10492136 Dcll1         | NM_019978    | 3.61592e-013 | 4.94534 | E11.5 * Wnt1 up vs E11.5 * Ctrl |
| 10599880 Sli1rk2       | NM_198863    | 3.03626e-011 | 4.94126 | E11.5 * Wnt1 up vs E11.5 * Ctrl |
| 10603896 Khlh13        | NM_026167    | 1.10247e-013 | 4.84176 | E11.5 * Wnt1 up vs E11.5 * Ctrl |
| 10571865 Scrg1         | NM_009136    | 2.22772e-009 | 4.76097 | E11.5 * Wnt1 up vs E11.5 * Ctrl |
| 10599884               | ---          | 3.2008e-005  | 4.6645  | E11.5 * Wnt1 up vs E11.5 * Ctrl |
| 10554900 Dlg2          | NM_011807    | 4.07211e-012 | 4.66011 | E11.5 * Wnt1 up vs E11.5 * Ctrl |
| 10543058 Dlx5          | NM_010056    | 5.47266e-008 | 4.60176 | E11.5 * Wnt1 up vs E11.5 * Ctrl |
| 10485955 Scg5          | NM_009162    | 3.17085e-012 | 4.56607 | E11.5 * Wnt1 up vs E11.5 * Ctrl |
| 10351400 Fam78b        | NM_175461    | 2.80275e-011 | 4.51303 | E11.5 * Wnt1 up vs E11.5 * Ctrl |
| 10354529 1700019D03Rik | NM_144953    | 2.40686e-009 | 4.44768 | E11.5 * Wnt1 up vs E11.5 * Ctrl |
| 10522388 Slc10a4       | NM_173403    | 3.87104e-010 | 4.33864 | E11.5 * Wnt1 up vs E11.5 * Ctrl |
| 10359113 Fam163a       | NM_177838    | 7.0512e-009  | 4.32935 | E11.5 * Wnt1 up vs E11.5 * Ctrl |
| 10529903 Fam184b       | NM_021416    | 1.26761e-009 | 4.29196 | E11.5 * Wnt1 up vs E11.5 * Ctrl |
| 10562223 Fxyd3         | NM_008557    | 6.60743e-012 | 4.28844 | E11.5 * Wnt1 up vs E11.5 * Ctrl |
| 10483803 6720416L17Rik | ENSMUST00000 | 1.72183e-010 | 4.25208 | E11.5 * Wnt1 up vs E11.5 * Ctrl |
| 10514520 Cyp2j9        | NM_028979    | 4.02258e-010 | 4.23413 | E11.5 * Wnt1 up vs E11.5 * Ctrl |
| 10533055 1500001A10Rik | NM_026886    | 6.51542e-013 | 4.21958 | E11.5 * Wnt1 up vs E11.5 * Ctrl |
| 10473125 Itga4         | NM_010576    | 2.65603e-009 | 4.20432 | E11.5 * Wnt1 up vs E11.5 * Ctrl |
| 10468452 Sorcs1        | NM_021377    | 1.85888e-012 | 4.10891 | E11.5 * Wnt1 up vs E11.5 * Ctrl |
| 10458052 Epb4.1l4a     | NM_013512    | 4.94244e-012 | 4.08825 | E11.5 * Wnt1 up vs E11.5 * Ctrl |
| 10598626 Tspan7        | NM_019634    | 9.70718e-012 | 4.08326 | E11.5 * Wnt1 up vs E11.5 * Ctrl |
| 10474096 Lrrc4c        | NM_178725    | 1.21754e-011 | 4.03544 | E11.5 * Wnt1 up vs E11.5 * Ctrl |
| 10584259 Fez1          | NM_183171    | 3.24499e-013 | 3.99424 | E11.5 * Wnt1 up vs E11.5 * Ctrl |
| 10505998 Fggy          | NM_001113412 | 5.69399e-007 | 3.99178 | E11.5 * Wnt1 up vs E11.5 * Ctrl |
| 10492165               | ---          | 4.62182e-007 | 3.95833 | E11.5 * Wnt1 up vs E11.5 * Ctrl |
| 10505994 Fggy          | NM_001113412 | 8.01976e-006 | 3.94861 | E11.5 * Wnt1 up vs E11.5 * Ctrl |
| 10371578 Ascl1         | NM_008553    | 8.61029e-007 | 3.93953 | E11.5 * Wnt1 up vs E11.5 * Ctrl |
| 10471994 Klf5c         | NM_008449    | 1.67602e-010 | 3.92982 | E11.5 * Wnt1 up vs E11.5 * Ctrl |
| 10465820 Gng3          | NM_010316    | 3.73254e-009 | 3.92909 | E11.5 * Wnt1 up vs E11.5 * Ctrl |
| 10520950 Pdlim1        | NM_016861    | 4.31168e-010 | 3.89099 | E11.5 * Wnt1 up vs E11.5 * Ctrl |
| 10467420 Pdlim1        | NM_016861    | 7.73648e-010 | 3.85876 | E11.5 * Wnt1 up vs E11.5 * Ctrl |
| 10568107               | ---          | 8.20629e-006 | 3.80555 | E11.5 * Wnt1 up vs E11.5 * Ctrl |
| 10535956 Stard13       | NM_146258    | 1.14136e-008 | 3.80342 | E11.5 * Wnt1 up vs E11.5 * Ctrl |
| 10440258 Epha3         | NM_010140    | 6.16025e-014 | 3.7881  | E11.5 * Wnt1 up vs E11.5 * Ctrl |
| 10362003 F730021E23Rik | AK155606     | 3.81831e-006 | 3.69626 | E11.5 * Wnt1 up vs E11.5 * Ctrl |
| 10502510 Lmo4          | NM_010723    | 1.23824e-010 | 3.69138 | E11.5 * Wnt1 up vs E11.5 * Ctrl |
| 10549222 Bcat1         | NM_001024468 | 9.33499e-010 | 3.68496 | E11.5 * Wnt1 up vs E11.5 * Ctrl |
| 10366163 Slc6a15       | NM_175328    | 1.49213e-008 | 3.68259 | E11.5 * Wnt1 up vs E11.5 * Ctrl |
| 10362363 6330407J23Rik | NM_026138    | 1.2479e-010  | 3.67398 | E11.5 * Wnt1 up vs E11.5 * Ctrl |
| 10503218 Chd7          | NM_001081417 | 1.35275e-006 | 3.66735 | E11.5 * Wnt1 up vs E11.5 * Ctrl |
| 10564163 Snord116      | NR_002895    | 1.05174e-005 | 3.65318 | E11.5 * Wnt1 up vs E11.5 * Ctrl |
| 10564167 Snord116      | NR_002895    | 1.05174e-005 | 3.65318 | E11.5 * Wnt1 up vs E11.5 * Ctrl |
| 10564171 Snord116      | NR_002895    | 1.05174e-005 | 3.65318 | E11.5 * Wnt1 up vs E11.5 * Ctrl |
| 10564173 Snord116      | NR_002895    | 1.05174e-005 | 3.65318 | E11.5 * Wnt1 up vs E11.5 * Ctrl |
| 10564175 Snord116      | NR_002895    | 1.05174e-005 | 3.65318 | E11.5 * Wnt1 up vs E11.5 * Ctrl |
| 10564179 Snord116      | NR_002895    | 1.05174e-005 | 3.65318 | E11.5 * Wnt1 up vs E11.5 * Ctrl |
| 10564181 Snord116      | NR_002895    | 1.05174e-005 | 3.65318 | E11.5 * Wnt1 up vs E11.5 * Ctrl |
| 10564185 Snord116      | NR_002895    | 1.05174e-005 | 3.65318 | E11.5 * Wnt1 up vs E11.5 * Ctrl |
| 10564187 Snord116      | NR_002895    | 1.05174e-005 | 3.65318 | E11.5 * Wnt1 up vs E11.5 * Ctrl |
| 10564189 Snord116      | NR_002895    | 1.05174e-005 | 3.65318 | E11.5 * Wnt1 up vs E11.5 * Ctrl |
| 10564191 Snord116      | NR_002895    | 1.05174e-005 | 3.65318 | E11.5 * Wnt1 up vs E11.5 * Ctrl |
| 10564193 Snord116      | NR_002895    | 1.05174e-005 | 3.65318 | E11.5 * Wnt1 up vs E11.5 * Ctrl |
| 10564195 Snord116      | NR_002895    | 1.05174e-005 | 3.65318 | E11.5 * Wnt1 up vs E11.5 * Ctrl |
| 10564197 Snord116      | NR_002895    | 1.05174e-005 | 3.65318 | E11.5 * Wnt1 up vs E11.5 * Ctrl |
| 10564199 Snord116      | NR_002895    | 1.05174e-005 | 3.65318 | E11.5 * Wnt1 up vs E11.5 * Ctrl |
| 10564201 Snord116      | AF241256     | 1.05174e-005 | 3.65318 | E11.5 * Wnt1 up vs E11.5 * Ctrl |

|          |               |               |              |         |                                 |
|----------|---------------|---------------|--------------|---------|---------------------------------|
| 10564205 | Snord116      | AF241256      | 1.05174e-005 | 3.65318 | E11.5 * Wnt1 up vs E11.5 * Ctrl |
| 10564207 | Snord116      | AF241256      | 1.05174e-005 | 3.65318 | E11.5 * Wnt1 up vs E11.5 * Ctrl |
| 10406461 | C130071C03Rik | ENSMUST000001 | 1.58062e-008 | 3.64034 | E11.5 * Wnt1 up vs E11.5 * Ctrl |
| 10428619 | Enpp2         | NM_015744     | 1.15831e-009 | 3.63756 | E11.5 * Wnt1 up vs E11.5 * Ctrl |
| 10501924 | Ndst3         | NM_031186     | 6.69149e-010 | 3.63028 | E11.5 * Wnt1 up vs E11.5 * Ctrl |
| 10457963 | Gpr17         | NM_001025381  | 1.39318e-008 | 3.60987 | E11.5 * Wnt1 up vs E11.5 * Ctrl |
| 10534960 | Gje1          | NM_080450     | 2.43184e-007 | 3.58489 | E11.5 * Wnt1 up vs E11.5 * Ctrl |
| 10503214 | Chd7          | NM_001081417  | 1.38007e-009 | 3.56639 | E11.5 * Wnt1 up vs E11.5 * Ctrl |
| 10507840 | Heyl          | NM_013905     | 6.47043e-008 | 3.54791 | E11.5 * Wnt1 up vs E11.5 * Ctrl |
| 10564161 | Snord116      | NR_002895     | 1.03894e-005 | 3.53897 | E11.5 * Wnt1 up vs E11.5 * Ctrl |
| 10381154 | Cnp           | NM_009923     | 1.65758e-010 | 3.5367  | E11.5 * Wnt1 up vs E11.5 * Ctrl |
| 10411527 | Cartpt        | NM_013732     | 4.16646e-006 | 3.51589 | E11.5 * Wnt1 up vs E11.5 * Ctrl |
| 10556509 | Spon1         | NM_145584     | 3.16837e-012 | 3.49017 | E11.5 * Wnt1 up vs E11.5 * Ctrl |
| 10447056 | Qpct          | NM_027455     | 6.63397e-010 | 3.48957 | E11.5 * Wnt1 up vs E11.5 * Ctrl |
| 10373407 | Mbc2          | NM_011843     | 6.10435e-009 | 3.44728 | E11.5 * Wnt1 up vs E11.5 * Ctrl |
| 10363541 | Ass1          | NM_007494     | 2.19804e-008 | 3.41927 | E11.5 * Wnt1 up vs E11.5 * Ctrl |
| 10492640 | Fstl5         | NM_178673     | 4.18971e-009 | 3.41381 | E11.5 * Wnt1 up vs E11.5 * Ctrl |
| 10553537 | Luzp2         | NM_178705     | 1.65784e-007 | 3.4112  | E11.5 * Wnt1 up vs E11.5 * Ctrl |
| 10564177 | Snord116      | AF241256      | 1.52834e-005 | 3.39238 | E11.5 * Wnt1 up vs E11.5 * Ctrl |
| 10503234 | Rlbp11        | NM_028940     | 5.67685e-012 | 3.38405 | E11.5 * Wnt1 up vs E11.5 * Ctrl |
| 10413419 | Arhgef3       | NM_027871     | 3.30963e-010 | 3.37175 | E11.5 * Wnt1 up vs E11.5 * Ctrl |
| 10492341 | 4631416L12Rik | NM_001081295  | 5.06174e-009 | 3.30314 | E11.5 * Wnt1 up vs E11.5 * Ctrl |
| 10479698 | Myt1          | NM_008665     | 7.29682e-009 | 3.30266 | E11.5 * Wnt1 up vs E11.5 * Ctrl |
| 10411519 | Mtap1b        | NM_008634     | 6.95782e-011 | 3.30258 | E11.5 * Wnt1 up vs E11.5 * Ctrl |
| 10468722 | Gfra1         | NM_010279     | 3.29396e-010 | 3.24895 | E11.5 * Wnt1 up vs E11.5 * Ctrl |
| 10471945 | Zeb2          | NM_015753     | 3.14418e-009 | 3.24799 | E11.5 * Wnt1 up vs E11.5 * Ctrl |
| 10350733 | Rgs16         | NM_011267     | 7.17857e-007 | 3.24569 | E11.5 * Wnt1 up vs E11.5 * Ctrl |
| 10416090 | Stmn4         | NM_019675     | 5.31879e-008 | 3.24355 | E11.5 * Wnt1 up vs E11.5 * Ctrl |
| 10604751 | Fgf13         | NM_010200     | 1.85158e-007 | 3.22698 | E11.5 * Wnt1 up vs E11.5 * Ctrl |
| 10514352 | Elavl2        | NM_207685     | 2.307e-009   | 3.21067 | E11.5 * Wnt1 up vs E11.5 * Ctrl |
| 10465943 | Dagla         | NM_198114     | 3.5692e-007  | 3.20943 | E11.5 * Wnt1 up vs E11.5 * Ctrl |
| 10548030 | Cd9           | NM_007657     | 1.21836e-008 | 3.19201 | E11.5 * Wnt1 up vs E11.5 * Ctrl |
| 10388430 | Serpinf1      | NM_011340     | 2.60328e-012 | 3.17943 | E11.5 * Wnt1 up vs E11.5 * Ctrl |
| 10362538 | Lama4         | NM_010681     | 1.74267e-013 | 3.17633 | E11.5 * Wnt1 up vs E11.5 * Ctrl |
| 10439651 | Cd200         | NM_010818     | 5.69644e-009 | 3.17305 | E11.5 * Wnt1 up vs E11.5 * Ctrl |
| 10357736 | Nfasc         | NM_182716     | 2.06462e-008 | 3.17218 | E11.5 * Wnt1 up vs E11.5 * Ctrl |
| 10418835 | Slc18a3       | NM_021712     | 8.33535e-007 | 3.13649 | E11.5 * Wnt1 up vs E11.5 * Ctrl |
| 10452766 | ---           | ---           | 0.00241752   | 3.1272  | E11.5 * Wnt1 up vs E11.5 * Ctrl |
| 10485198 | Tspan18       | NM_183180     | 5.08186e-010 | 3.11657 | E11.5 * Wnt1 up vs E11.5 * Ctrl |
| 10440534 | Adamts5       | NM_011782     | 9.20731e-008 | 3.11541 | E11.5 * Wnt1 up vs E11.5 * Ctrl |
| 10344679 | St18          | NM_173868     | 2.79625e-009 | 3.10127 | E11.5 * Wnt1 up vs E11.5 * Ctrl |
| 10471154 | Ass1          | NM_007494     | 1.09103e-007 | 3.10121 | E11.5 * Wnt1 up vs E11.5 * Ctrl |
| 10359908 | Rgs4          | NM_009062     | 7.30812e-008 | 3.07917 | E11.5 * Wnt1 up vs E11.5 * Ctrl |
| 10564183 | Snord116      | AF241256      | 2.54107e-005 | 3.0676  | E11.5 * Wnt1 up vs E11.5 * Ctrl |
| 10346150 | Tmeff2        | NM_019790     | 2.00188e-011 | 3.05115 | E11.5 * Wnt1 up vs E11.5 * Ctrl |
| 10487139 | Shc4          | NM_199022     | 2.44398e-011 | 3.05113 | E11.5 * Wnt1 up vs E11.5 * Ctrl |
| 10564159 | Snord116      | AF241256      | 3.06453e-005 | 3.04541 | E11.5 * Wnt1 up vs E11.5 * Ctrl |
| 10435733 | Igsf11        | NM_170599     | 2.27651e-009 | 3.03287 | E11.5 * Wnt1 up vs E11.5 * Ctrl |
| 10532753 | Coro1c        | NM_011779     | 1.33464e-009 | 3.03177 | E11.5 * Wnt1 up vs E11.5 * Ctrl |
| 10458534 | Pcdh1         | NM_029357     | 1.66877e-008 | 3.02755 | E11.5 * Wnt1 up vs E11.5 * Ctrl |
| 10505996 | Fggy          | NM_001113412  | 9.66708e-008 | 3.01445 | E11.5 * Wnt1 up vs E11.5 * Ctrl |
| 10362186 | Moxd1         | NM_021509     | 3.29139e-007 | 2.99873 | E11.5 * Wnt1 up vs E11.5 * Ctrl |
| 10482448 | Zeb2          | NM_015753     | 2.67738e-012 | 2.99606 | E11.5 * Wnt1 up vs E11.5 * Ctrl |
| 10518947 | Ajap1         | NM_001099299  | 1.9721e-009  | 2.993   | E11.5 * Wnt1 up vs E11.5 * Ctrl |
| 10503202 | Chd7          | NM_001081417  | 1.44607e-009 | 2.97831 | E11.5 * Wnt1 up vs E11.5 * Ctrl |
| 10525016 | Tbx3          | NM_011535     | 1.39399e-012 | 2.95064 | E11.5 * Wnt1 up vs E11.5 * Ctrl |
| 10344973 | Gdap1         | NM_010267     | 7.61697e-007 | 2.94362 | E11.5 * Wnt1 up vs E11.5 * Ctrl |
| 10485979 | Gjd2          | NM_010290     | 1.64245e-005 | 2.93681 | E11.5 * Wnt1 up vs E11.5 * Ctrl |
| 10404792 | Phactr1       | NM_198419     | 4.09375e-010 | 2.93334 | E11.5 * Wnt1 up vs E11.5 * Ctrl |
| 10455826 | Megf10        | NM_001001979  | 4.24431e-008 | 2.92897 | E11.5 * Wnt1 up vs E11.5 * Ctrl |
| 10503198 | Chd7          | NM_001081417  | 5.02305e-008 | 2.9056  | E11.5 * Wnt1 up vs E11.5 * Ctrl |
| 10395702 | Akap6         | NM_198111     | 3.02554e-011 | 2.89066 | E11.5 * Wnt1 up vs E11.5 * Ctrl |
| 10371332 | Aldh1l2       | NM_153543     | 1.11366e-009 | 2.88752 | E11.5 * Wnt1 up vs E11.5 * Ctrl |
| 10503194 | Chd7          | NM_001081417  | 6.13399e-007 | 2.8764  | E11.5 * Wnt1 up vs E11.5 * Ctrl |
| 10362596 | Fyn           | NM_001122893  | 7.62072e-017 | 2.85734 | E11.5 * Wnt1 up vs E11.5 * Ctrl |
| 10434845 | Il1rap        | NM_008364     | 1.06359e-010 | 2.85636 | E11.5 * Wnt1 up vs E11.5 * Ctrl |

|          |          |              |              |         |                                 |
|----------|----------|--------------|--------------|---------|---------------------------------|
| 10363146 | Slc35f1  | NM_178675    | 1.51847e-007 | 2.8559  | E11.5 * Wnt1 up vs E11.5 * Ctrl |
| 10350438 | Kcnt2    | NM_001081027 | 1.32626e-006 | 2.84774 | E11.5 * Wnt1 up vs E11.5 * Ctrl |
| 10564165 | Snord116 | AF241256     | 6.51493e-005 | 2.84336 | E11.5 * Wnt1 up vs E11.5 * Ctrl |
| 10498710 | Bche     | NM_009738    | 3.98374e-008 | 2.83902 | E11.5 * Wnt1 up vs E11.5 * Ctrl |
| 10594447 | Map2k1   | NM_008927    | 1.33453e-010 | 2.83821 | E11.5 * Wnt1 up vs E11.5 * Ctrl |
| 10422244 | Slitrk6  | NM_175499    | 1.37685e-008 | 2.82057 | E11.5 * Wnt1 up vs E11.5 * Ctrl |
| 10431697 | Abcd2    | NM_011994    | 7.06257e-007 | 2.8179  | E11.5 * Wnt1 up vs E11.5 * Ctrl |
| 10393379 | Mxra7    | NM_026280    | 1.17629e-009 | 2.8118  | E11.5 * Wnt1 up vs E11.5 * Ctrl |
| 10573979 | Gnao1    | NM_010308    | 1.17217e-010 | 2.80762 | E11.5 * Wnt1 up vs E11.5 * Ctrl |
| 10448967 | Sox8     | NM_011447    | 1.04303e-008 | 2.80232 | E11.5 * Wnt1 up vs E11.5 * Ctrl |
| 10588755 | Camkv    | NM_145621    | 1.22655e-007 | 2.79669 | E11.5 * Wnt1 up vs E11.5 * Ctrl |
| 10395414 | Tmem195  | NM_178767    | 2.37738e-006 | 2.7954  | E11.5 * Wnt1 up vs E11.5 * Ctrl |
| 10566723 | Lmo1     | NM_057173    | 7.94399e-011 | 2.78686 | E11.5 * Wnt1 up vs E11.5 * Ctrl |
| 10503200 | Chd7     | NM_001081417 | 5.05302e-008 | 2.77209 | E11.5 * Wnt1 up vs E11.5 * Ctrl |
| 10577190 | Rasa3    | NM_009025    | 2.20515e-009 | 2.75507 | E11.5 * Wnt1 up vs E11.5 * Ctrl |
| 10431017 | Ttll1    | NM_178869    | 7.65956e-011 | 2.75505 | E11.5 * Wnt1 up vs E11.5 * Ctrl |
| 10385391 | Cyfp2    | NM_133769    | 5.53023e-010 | 2.75199 | E11.5 * Wnt1 up vs E11.5 * Ctrl |
| 10417798 | Kcnk5    | NM_021542    | 1.59119e-007 | 2.75006 | E11.5 * Wnt1 up vs E11.5 * Ctrl |
| 10539310 | Pcgf1    | NM_197992    | 2.08977e-007 | 2.74869 | E11.5 * Wnt1 up vs E11.5 * Ctrl |
| 10594301 | Coro2b   | NM_175484    | 2.42447e-008 | 2.74706 | E11.5 * Wnt1 up vs E11.5 * Ctrl |
| 10503222 | Chd7     | NM_001081417 | 3.55165e-009 | 2.74097 | E11.5 * Wnt1 up vs E11.5 * Ctrl |
| 10366043 | Dusp6    | NM_026268    | 4.02725e-007 | 2.74047 | E11.5 * Wnt1 up vs E11.5 * Ctrl |
| 10585048 | Cadm1    | NM_207675    | 8.64761e-012 | 2.73501 | E11.5 * Wnt1 up vs E11.5 * Ctrl |
| 10439695 | Tagln3   | NM_019754    | 3.52756e-009 | 2.7348  | E11.5 * Wnt1 up vs E11.5 * Ctrl |
| 10499138 | Dclk2    | NM_027539    | 1.60456e-010 | 2.72725 | E11.5 * Wnt1 up vs E11.5 * Ctrl |
| 10358547 | Hmcn1    | NM_001024720 | 2.24024e-006 | 2.72232 | E11.5 * Wnt1 up vs E11.5 * Ctrl |
| 10494069 | Tnrc4    | NM_172434    | 1.7244e-005  | 2.71853 | E11.5 * Wnt1 up vs E11.5 * Ctrl |
| 10478374 | Gdap1l1  | NM_144891    | 3.79551e-009 | 2.71672 | E11.5 * Wnt1 up vs E11.5 * Ctrl |
| 10354506 | Mfsd6    | NM_133829    | 5.68404e-007 | 2.69921 | E11.5 * Wnt1 up vs E11.5 * Ctrl |
| 10568668 | Adam12   | NM_007400    | 1.42108e-008 | 2.67708 | E11.5 * Wnt1 up vs E11.5 * Ctrl |
| 10430458 | Sox10    | NM_011437    | 5.08671e-007 | 2.66898 | E11.5 * Wnt1 up vs E11.5 * Ctrl |
| 10416175 | Nefl     | NM_010910    | 2.1972e-008  | 2.66784 | E11.5 * Wnt1 up vs E11.5 * Ctrl |
| 10375313 | Ccnjl    | NM_001045530 | 8.93736e-009 | 2.66519 | E11.5 * Wnt1 up vs E11.5 * Ctrl |
| 10584674 | Mcam     | NM_023061    | 4.95701e-010 | 2.65847 | E11.5 * Wnt1 up vs E11.5 * Ctrl |
| 10503216 | Chd7     | NM_001081417 | 1.90056e-009 | 2.65665 | E11.5 * Wnt1 up vs E11.5 * Ctrl |
| 10462613 | Ifit2    | NM_008332    | 1.23001e-010 | 2.6486  | E11.5 * Wnt1 up vs E11.5 * Ctrl |
| 10538356 | Chn2     | NM_023543    | 8.2751e-009  | 2.63684 | E11.5 * Wnt1 up vs E11.5 * Ctrl |
| 10603289 | Cicn5    | NM_016691    | 5.13252e-012 | 2.63019 | E11.5 * Wnt1 up vs E11.5 * Ctrl |
| 10506433 | Dab1     | NM_177259    | 4.53409e-009 | 2.62571 | E11.5 * Wnt1 up vs E11.5 * Ctrl |
| 10424559 | Khdrbs3  | NM_010158    | 1.14497e-011 | 2.6241  | E11.5 * Wnt1 up vs E11.5 * Ctrl |
| 10472820 | Itga6    | NM_008397    | 4.95411e-009 | 2.61806 | E11.5 * Wnt1 up vs E11.5 * Ctrl |
| 10360418 | Rgs7     | NM_011880    | 7.71681e-007 | 2.61095 | E11.5 * Wnt1 up vs E11.5 * Ctrl |
| 10503212 | Chd7     | NM_001081417 | 1.65465e-006 | 2.60184 | E11.5 * Wnt1 up vs E11.5 * Ctrl |
| 10503166 | Chd7     | NM_001081417 | 2.88344e-006 | 2.5963  | E11.5 * Wnt1 up vs E11.5 * Ctrl |
| 10602805 | Mtap7d2  | NM_001081124 | 9.24453e-009 | 2.5829  | E11.5 * Wnt1 up vs E11.5 * Ctrl |
| 10521498 | Crmp1    | NM_007765    | 1.76652e-008 | 2.57038 | E11.5 * Wnt1 up vs E11.5 * Ctrl |
| 10396125 | Atl1     | NM_178628    | 2.7072e-007  | 2.56736 | E11.5 * Wnt1 up vs E11.5 * Ctrl |
| 10422537 | Nalcn    | NM_177393    | 4.98349e-009 | 2.56576 | E11.5 * Wnt1 up vs E11.5 * Ctrl |
| 10476628 | Otor     | NM_020595    | 1.53314e-007 | 2.55402 | E11.5 * Wnt1 up vs E11.5 * Ctrl |
| 10402061 | Eml5     | BC049855     | 1.29313e-006 | 2.55335 | E11.5 * Wnt1 up vs E11.5 * Ctrl |
| 10492021 | Postn    | NM_015784    | 2.83547e-009 | 2.55284 | E11.5 * Wnt1 up vs E11.5 * Ctrl |
| 10410547 | Nkd2     | NM_028186    | 2.29376e-007 | 2.54501 | E11.5 * Wnt1 up vs E11.5 * Ctrl |
| 10603051 | Ap1s2    | NM_026887    | 2.02144e-005 | 2.54308 | E11.5 * Wnt1 up vs E11.5 * Ctrl |
| 10408850 | Nedd9    | NM_001111324 | 1.28215e-010 | 2.53709 | E11.5 * Wnt1 up vs E11.5 * Ctrl |
| 10564169 | Snord116 | AF241256     | 0.000146323  | 2.53164 | E11.5 * Wnt1 up vs E11.5 * Ctrl |
| 10552075 | Lgi4     | NM_144556    | 3.12781e-008 | 2.52671 | E11.5 * Wnt1 up vs E11.5 * Ctrl |
| 10503220 | Chd7     | NM_001081417 | 6.45543e-007 | 2.52462 | E11.5 * Wnt1 up vs E11.5 * Ctrl |
| 10530499 | EG545758 | NM_001024147 | 4.45958e-008 | 2.52192 | E11.5 * Wnt1 up vs E11.5 * Ctrl |
| 10461057 | Rcor2    | NM_054048    | 7.6588e-007  | 2.51908 | E11.5 * Wnt1 up vs E11.5 * Ctrl |
| 10595298 | Filip1   | NM_001081243 | 3.65591e-006 | 2.51498 | E11.5 * Wnt1 up vs E11.5 * Ctrl |
| 10574350 | Mmp15    | NM_008609    | 6.21354e-008 | 2.51218 | E11.5 * Wnt1 up vs E11.5 * Ctrl |
| 10587299 | Ick      | NM_019987    | 9.0156e-011  | 2.51165 | E11.5 * Wnt1 up vs E11.5 * Ctrl |
| 10495781 | Bcar3    | NM_013867    | 1.17453e-006 | 2.50281 | E11.5 * Wnt1 up vs E11.5 * Ctrl |
| 10384378 | Ddc      | NM_016672    | 7.66233e-010 | 2.49306 | E11.5 * Wnt1 up vs E11.5 * Ctrl |
| 10503190 | Chd7     | NM_001081417 | 4.33284e-008 | 2.49109 | E11.5 * Wnt1 up vs E11.5 * Ctrl |
| 10562532 | Zfp536   | NM_172385    | 3.69085e-008 | 2.48071 | E11.5 * Wnt1 up vs E11.5 * Ctrl |

|                        |              |              |         |                                 |
|------------------------|--------------|--------------|---------|---------------------------------|
| 10479950 Cugbp2        | NM_001110231 | 2.85035e-011 | 2.47889 | E11.5 * Wnt1 up vs E11.5 * Ctrl |
| 10538482 Adcyap1r1     | NM_007407    | 1.6378e-007  | 2.47626 | E11.5 * Wnt1 up vs E11.5 * Ctrl |
| 10368997 C130030K03Rik | AK048022     | 0.00068519   | 2.47533 | E11.5 * Wnt1 up vs E11.5 * Ctrl |
| 10492628 Serpini1      | NM_009250    | 2.91785e-007 | 2.47436 | E11.5 * Wnt1 up vs E11.5 * Ctrl |
| 10602068 Mid2          | NM_011845    | 1.69533e-010 | 2.47297 | E11.5 * Wnt1 up vs E11.5 * Ctrl |
| 10503206 Chd7          | NM_001081417 | 9.91686e-008 | 2.47146 | E11.5 * Wnt1 up vs E11.5 * Ctrl |
| 10548051 Kcna6         | NM_013568    | 7.15162e-008 | 2.46754 | E11.5 * Wnt1 up vs E11.5 * Ctrl |
| 10399505 Greb1         | NM_015764    | 9.22376e-008 | 2.46619 | E11.5 * Wnt1 up vs E11.5 * Ctrl |
| 10503208 Chd7          | NM_001081417 | 1.94108e-007 | 2.46573 | E11.5 * Wnt1 up vs E11.5 * Ctrl |
| 10497663 Slc7a14       | NM_172861    | 4.52374e-008 | 2.46518 | E11.5 * Wnt1 up vs E11.5 * Ctrl |
| 10365290 Chst11        | NM_021439    | 6.45204e-008 | 2.46358 | E11.5 * Wnt1 up vs E11.5 * Ctrl |
| 10490559 Chrna4        | NM_015730    | 7.20095e-007 | 2.46063 | E11.5 * Wnt1 up vs E11.5 * Ctrl |
| 10350136 Csrp1         | NM_007791    | 1.23423e-008 | 2.45723 | E11.5 * Wnt1 up vs E11.5 * Ctrl |
| 10500114 Mlt11         | NM_019914    | 8.90387e-011 | 2.45594 | E11.5 * Wnt1 up vs E11.5 * Ctrl |
| 10503196 Chd7          | NM_001081417 | 5.09971e-008 | 2.45278 | E11.5 * Wnt1 up vs E11.5 * Ctrl |
| 10469138 4930412O13Rik | NR_024257    | 4.8491e-005  | 2.45127 | E11.5 * Wnt1 up vs E11.5 * Ctrl |
| 10468992 Frmd4a        | NM_172475    | 7.6364e-010  | 2.44387 | E11.5 * Wnt1 up vs E11.5 * Ctrl |
| 10472984 Hoxd3         | NM_010468    | 1.7162e-008  | 2.44088 | E11.5 * Wnt1 up vs E11.5 * Ctrl |
| 10374197 Ramp3         | NM_019511    | 5.17216e-008 | 2.43374 | E11.5 * Wnt1 up vs E11.5 * Ctrl |
| 10555027 Gab2          | NM_010248    | 1.77836e-010 | 2.43271 | E11.5 * Wnt1 up vs E11.5 * Ctrl |
| 10522976 Rufy3         | NM_027530    | 8.48225e-012 | 2.42358 | E11.5 * Wnt1 up vs E11.5 * Ctrl |
| 10403604 Lyst          | NM_010748    | 6.31302e-010 | 2.41962 | E11.5 * Wnt1 up vs E11.5 * Ctrl |
| 10358549 Hmcn1         | NM_001024720 | 3.18773e-007 | 2.41892 | E11.5 * Wnt1 up vs E11.5 * Ctrl |
| 10457606 Kctd1         | NM_134112    | 1.08418e-007 | 2.40604 | E11.5 * Wnt1 up vs E11.5 * Ctrl |
| 10499062 Fhdc1         | NM_001033301 | 5.95876e-006 | 2.40576 | E11.5 * Wnt1 up vs E11.5 * Ctrl |
| 10358557 Hmcn1         | NM_001024720 | 7.15159e-007 | 2.40045 | E11.5 * Wnt1 up vs E11.5 * Ctrl |
| 10399973 Hdac9         | NM_024124    | 6.34885e-010 | 2.39261 | E11.5 * Wnt1 up vs E11.5 * Ctrl |
| 10493798 S100a16       | NM_026416    | 3.28462e-007 | 2.37522 | E11.5 * Wnt1 up vs E11.5 * Ctrl |
| 10523758 Lrrc8b        | NM_001033550 | 6.12129e-008 | 2.36819 | E11.5 * Wnt1 up vs E11.5 * Ctrl |
| 10415132 Cmtm5         | NM_026066    | 1.94715e-008 | 2.36183 | E11.5 * Wnt1 up vs E11.5 * Ctrl |
| 10546685 Eif4e3        | NM_025829    | 2.33966e-010 | 2.35969 | E11.5 * Wnt1 up vs E11.5 * Ctrl |
| 10397002 Sipa11i       | NM_172579    | 2.19136e-009 | 2.35117 | E11.5 * Wnt1 up vs E11.5 * Ctrl |
| 10355836 Resp18        | NM_009049    | 4.38664e-007 | 2.34974 | E11.5 * Wnt1 up vs E11.5 * Ctrl |
| 10474064 Trp53i11      | NM_001025246 | 7.6294e-006  | 2.34512 | E11.5 * Wnt1 up vs E11.5 * Ctrl |
| 10481711 Stxbp1        | NM_001113569 | 3.63536e-008 | 2.34438 | E11.5 * Wnt1 up vs E11.5 * Ctrl |
| 10345241 Dst           | NM_134448    | 4.71859e-012 | 2.34129 | E11.5 * Wnt1 up vs E11.5 * Ctrl |
| 10567546 Crym          | NM_016669    | 8.09937e-009 | 2.33621 | E11.5 * Wnt1 up vs E11.5 * Ctrl |
| 10452734 Alk           | NM_007439    | 8.82002e-009 | 2.31877 | E11.5 * Wnt1 up vs E11.5 * Ctrl |
| 10423855 Rims2         | NM_053271    | 9.31221e-008 | 2.31829 | E11.5 * Wnt1 up vs E11.5 * Ctrl |
| 10352092 Zfp238        | NM_001012330 | 5.26771e-009 | 2.31524 | E11.5 * Wnt1 up vs E11.5 * Ctrl |
| 10606259               | ---          | 0.0032347    | 2.30993 | E11.5 * Wnt1 up vs E11.5 * Ctrl |
| 10607877 Prps2         | NM_026662    | 7.75743e-009 | 2.30984 | E11.5 * Wnt1 up vs E11.5 * Ctrl |
| 10503178 Chd7          | NM_001081417 | 3.04541e-009 | 2.30884 | E11.5 * Wnt1 up vs E11.5 * Ctrl |
| 10490665 Stmn3         | NM_009133    | 1.273e-007   | 2.30761 | E11.5 * Wnt1 up vs E11.5 * Ctrl |
| 10566668 Socs6         | NM_018821    | 4.74976e-005 | 2.30751 | E11.5 * Wnt1 up vs E11.5 * Ctrl |
| 10601152 Nlgn3         | NM_172932    | 3.89172e-009 | 2.30514 | E11.5 * Wnt1 up vs E11.5 * Ctrl |
| 10503176 Chd7          | NM_001081417 | 2.36176e-008 | 2.29611 | E11.5 * Wnt1 up vs E11.5 * Ctrl |
| 10457644 Cdh2          | NM_007664    | 3.70667e-012 | 2.29551 | E11.5 * Wnt1 up vs E11.5 * Ctrl |
| 10506360 Sgip1         | NM_144906    | 1.95845e-010 | 2.29373 | E11.5 * Wnt1 up vs E11.5 * Ctrl |
| 10553917 Apba2         | NM_007461    | 2.12512e-006 | 2.29018 | E11.5 * Wnt1 up vs E11.5 * Ctrl |
| 10607089 Acsf4         | NM_207625    | 1.90872e-008 | 2.28995 | E11.5 * Wnt1 up vs E11.5 * Ctrl |
| 10503172 Chd7          | NM_001081417 | 0.000395627  | 2.28763 | E11.5 * Wnt1 up vs E11.5 * Ctrl |
| 10421100 Nefm          | NM_008691    | 9.79668e-011 | 2.28438 | E11.5 * Wnt1 up vs E11.5 * Ctrl |
| 10422227 Spry2         | NM_011897    | 6.59935e-008 | 2.28122 | E11.5 * Wnt1 up vs E11.5 * Ctrl |
| 10406434 Mef2c         | NM_025282    | 2.05351e-010 | 2.279   | E11.5 * Wnt1 up vs E11.5 * Ctrl |
| 10448925 Cacna1h       | NM_021415    | 2.98572e-007 | 2.27413 | E11.5 * Wnt1 up vs E11.5 * Ctrl |
| 10503180 Chd7          | NM_001081417 | 8.08753e-008 | 2.27344 | E11.5 * Wnt1 up vs E11.5 * Ctrl |
| 10486201 OTTMUSG00000  | ENSMUST00000 | 9.1091e-006  | 2.27053 | E11.5 * Wnt1 up vs E11.5 * Ctrl |
| 10399360 Rhob          | NM_007483    | 7.40416e-008 | 2.26986 | E11.5 * Wnt1 up vs E11.5 * Ctrl |
| 10355456 Mreg          | NM_001005423 | 1.81887e-006 | 2.26632 | E11.5 * Wnt1 up vs E11.5 * Ctrl |
| 10570516 Kbtbd11       | NM_029116    | 2.538e-010   | 2.26507 | E11.5 * Wnt1 up vs E11.5 * Ctrl |
| 10458645 Ppp2r2b       | NM_028392    | 8.3615e-010  | 2.26408 | E11.5 * Wnt1 up vs E11.5 * Ctrl |
| 10521602 Cpeb2         | NM_175937    | 3.67464e-006 | 2.26245 | E11.5 * Wnt1 up vs E11.5 * Ctrl |
| 10567289 Syt17         | NM_138649    | 5.95788e-008 | 2.25735 | E11.5 * Wnt1 up vs E11.5 * Ctrl |
| 10381934 Tanc2         | NM_181071    | 1.03248e-006 | 2.24173 | E11.5 * Wnt1 up vs E11.5 * Ctrl |
| 10591706 Elavl3        | NM_010487    | 1.72701e-006 | 2.24087 | E11.5 * Wnt1 up vs E11.5 * Ctrl |

|          |               |               |              |         |                                 |
|----------|---------------|---------------|--------------|---------|---------------------------------|
| 10427496 | Egflam        | NM_178748     | 1.02245e-009 | 2.24035 | E11.5 * Wnt1 up vs E11.5 * Ctrl |
| 10555197 | Mtap6         | NM_010837     | 4.98404e-009 | 2.2392  | E11.5 * Wnt1 up vs E11.5 * Ctrl |
| 10375265 | Atp10b        | NM_176999     | 7.64243e-008 | 2.23792 | E11.5 * Wnt1 up vs E11.5 * Ctrl |
| 10527158 | Fscn1         | NM_007984     | 0.000238584  | 2.2357  | E11.5 * Wnt1 up vs E11.5 * Ctrl |
| 10549200 | Sox5          | NM_011444     | 1.79491e-007 | 2.23562 | E11.5 * Wnt1 up vs E11.5 * Ctrl |
| 10572989 | Slc10a7       | NM_029736     | 6.31522e-010 | 2.22537 | E11.5 * Wnt1 up vs E11.5 * Ctrl |
| 10593497 | Zc3h12c       | ENSMUST000001 | 3.77372e-007 | 2.2223  | E11.5 * Wnt1 up vs E11.5 * Ctrl |
| 10518484 | Fbxo44        | NM_173401     | 5.08054e-008 | 2.21409 | E11.5 * Wnt1 up vs E11.5 * Ctrl |
| 10449041 | Metrn         | NM_133719     | 1.0137e-006  | 2.20358 | E11.5 * Wnt1 up vs E11.5 * Ctrl |
| 10431051 | Scube1        | NM_022723     | 9.23489e-008 | 2.19753 | E11.5 * Wnt1 up vs E11.5 * Ctrl |
| 10514466 | Jun           | NM_010591     | 1.08579e-005 | 2.19102 | E11.5 * Wnt1 up vs E11.5 * Ctrl |
| 10598996 | EG331392      | NM_198633     | 4.37449e-007 | 2.18555 | E11.5 * Wnt1 up vs E11.5 * Ctrl |
| 10520527 | Dpysl5        | NM_023047     | 2.04646e-007 | 2.18392 | E11.5 * Wnt1 up vs E11.5 * Ctrl |
| 10564211 | Snrpn         | NM_013670     | 1.60003e-011 | 2.18346 | E11.5 * Wnt1 up vs E11.5 * Ctrl |
| 10500802 | Atg4a         | NM_174875     | 4.94281e-006 | 2.17951 | E11.5 * Wnt1 up vs E11.5 * Ctrl |
| 10503182 | Chd7          | NM_001081417  | 6.53783e-010 | 2.17417 | E11.5 * Wnt1 up vs E11.5 * Ctrl |
| 10471424 | Fam102a       | NM_153560     | 8.29945e-007 | 2.17374 | E11.5 * Wnt1 up vs E11.5 * Ctrl |
| 10519612 | 9330182L06Rik | NM_172706     | 4.67898e-007 | 2.17363 | E11.5 * Wnt1 up vs E11.5 * Ctrl |
| 10426244 | Mapk8ip2      | NM_021921     | 6.19373e-006 | 2.1629  | E11.5 * Wnt1 up vs E11.5 * Ctrl |
| 10548735 | Dusp16        | NM_130447     | 3.48337e-010 | 2.16094 | E11.5 * Wnt1 up vs E11.5 * Ctrl |
| 10503186 | Chd7          | NM_001081417  | 1.01529e-008 | 2.16073 | E11.5 * Wnt1 up vs E11.5 * Ctrl |
| 10347781 | 9430031J16Rik | BC082310      | 9.27969e-007 | 2.15919 | E11.5 * Wnt1 up vs E11.5 * Ctrl |
| 10432540 | Lima1         | NM_001113545  | 2.25439e-011 | 2.14962 | E11.5 * Wnt1 up vs E11.5 * Ctrl |
| 10394593 | Fam49a        | NM_029758     | 1.07287e-006 | 2.14235 | E11.5 * Wnt1 up vs E11.5 * Ctrl |
| 10581914 | Chst5         | NM_019950     | 7.39153e-008 | 2.14188 | E11.5 * Wnt1 up vs E11.5 * Ctrl |
| 10503184 | Chd7          | NM_001081417  | 1.25959e-009 | 2.1403  | E11.5 * Wnt1 up vs E11.5 * Ctrl |
| 10348493 | Lrrfip1       | NM_008515     | 1.97773e-010 | 2.13892 | E11.5 * Wnt1 up vs E11.5 * Ctrl |
| 10518751 | Car6          | NM_009802     | 0.000769734  | 2.13875 | E11.5 * Wnt1 up vs E11.5 * Ctrl |
| 10358635 | Hmcn1         | NM_001024720  | 9.91767e-006 | 2.13743 | E11.5 * Wnt1 up vs E11.5 * Ctrl |
| 10574166 | Cpne2         | NM_153507     | 2.53064e-009 | 2.13699 | E11.5 * Wnt1 up vs E11.5 * Ctrl |
| 10501971 | Ank2          | NM_178655     | 4.35115e-009 | 2.1359  | E11.5 * Wnt1 up vs E11.5 * Ctrl |
| 10599001 | Agtr2         | NM_007429     | 0.00346454   | 2.13429 | E11.5 * Wnt1 up vs E11.5 * Ctrl |
| 10605431 | Rab39b        | NM_175122     | 2.38787e-006 | 2.13291 | E11.5 * Wnt1 up vs E11.5 * Ctrl |
| 10358555 | Hmcn1         | NM_001024720  | 2.90833e-006 | 2.12918 | E11.5 * Wnt1 up vs E11.5 * Ctrl |
| 10389590 | Gdpd1         | NM_025638     | 8.03203e-008 | 2.12866 | E11.5 * Wnt1 up vs E11.5 * Ctrl |
| 10540227 | Kbtbd8        | NM_001008785  | 3.33958e-005 | 2.12533 | E11.5 * Wnt1 up vs E11.5 * Ctrl |
| 10356712 | Kif1a         | NM_008440     | 3.83236e-009 | 2.12501 | E11.5 * Wnt1 up vs E11.5 * Ctrl |
| 10518585 | Kif1b         | NM_207682     | 2.69475e-010 | 2.12492 | E11.5 * Wnt1 up vs E11.5 * Ctrl |
| 10545538 | Ctnna2        | NM_009819     | 1.21589e-006 | 2.11886 | E11.5 * Wnt1 up vs E11.5 * Ctrl |
| 10370766 | Gamt          | NM_010255     | 1.3945e-006  | 2.11592 | E11.5 * Wnt1 up vs E11.5 * Ctrl |
| 10503210 | Chd7          | NM_001081417  | 1.28427e-006 | 2.11409 | E11.5 * Wnt1 up vs E11.5 * Ctrl |
| 10481845 | Fam125b       | BC059907      | 7.33734e-008 | 2.11332 | E11.5 * Wnt1 up vs E11.5 * Ctrl |
| 10595013 | Tmod2         | NM_016711     | 2.53336e-009 | 2.11091 | E11.5 * Wnt1 up vs E11.5 * Ctrl |
| 10495285 | Sort1         | NM_019972     | 2.7874e-010  | 2.10954 | E11.5 * Wnt1 up vs E11.5 * Ctrl |
| 10355984 | Serpine2      | NM_009255     | 5.1519e-011  | 2.10446 | E11.5 * Wnt1 up vs E11.5 * Ctrl |
| 10365471 | Fbxo7         | NM_153195     | 9.03173e-010 | 2.10293 | E11.5 * Wnt1 up vs E11.5 * Ctrl |
| 10360920 | Tgfb2         | NM_009367     | 2.88006e-014 | 2.09873 | E11.5 * Wnt1 up vs E11.5 * Ctrl |
| 10543145 | Thsd7a        | ENSMUST000001 | 6.8467e-008  | 2.09758 | E11.5 * Wnt1 up vs E11.5 * Ctrl |
| 10418895 | Zfp488        | NM_001013777  | 5.69408e-008 | 2.09597 | E11.5 * Wnt1 up vs E11.5 * Ctrl |
| 10440522 | Adamts1       | NM_009621     | 3.14463e-008 | 2.09539 | E11.5 * Wnt1 up vs E11.5 * Ctrl |
| 10446553 | Epb4.1l3      | NM_013813     | 1.40321e-010 | 2.09519 | E11.5 * Wnt1 up vs E11.5 * Ctrl |
| 10452571 | Ptpm          | NM_008984     | 1.07352e-006 | 2.08651 | E11.5 * Wnt1 up vs E11.5 * Ctrl |
| 10347036 | Mtap2         | NM_001039934  | 4.0756e-010  | 2.08384 | E11.5 * Wnt1 up vs E11.5 * Ctrl |
| 10497920 | Ankrd50       | NM_001033198  | 1.25438e-009 | 2.08079 | E11.5 * Wnt1 up vs E11.5 * Ctrl |
| 10593492 | Zc3h12c       | AK220416      | 3.03632e-010 | 2.08035 | E11.5 * Wnt1 up vs E11.5 * Ctrl |
| 10556553 | Insc          | NM_173767     | 7.80718e-007 | 2.07916 | E11.5 * Wnt1 up vs E11.5 * Ctrl |
| 10497817 | Anxa5         | NM_009673     | 2.44529e-008 | 2.07834 | E11.5 * Wnt1 up vs E11.5 * Ctrl |
| 10607113 | Rgs3          | NM_134257     | 5.74402e-007 | 2.07777 | E11.5 * Wnt1 up vs E11.5 * Ctrl |
| 10454369 | Fhod3         | NM_175276     | 7.15383e-007 | 2.07463 | E11.5 * Wnt1 up vs E11.5 * Ctrl |
| 10535866 | Ubl3          | NM_011908     | 1.24502e-010 | 2.07307 | E11.5 * Wnt1 up vs E11.5 * Ctrl |
| 10355225 | ENSMUSG000001 | ENSMUST000001 | 5.57498e-006 | 2.0713  | E11.5 * Wnt1 up vs E11.5 * Ctrl |
| 10466410 | Psat1         | NM_177420     | 4.72825e-008 | 2.07129 | E11.5 * Wnt1 up vs E11.5 * Ctrl |
| 10531437 | Scarb2        | NM_007644     | 2.33819e-007 | 2.06366 | E11.5 * Wnt1 up vs E11.5 * Ctrl |
| 10499091 | Dear1         | NM_001040461  | 1.68388e-006 | 2.06269 | E11.5 * Wnt1 up vs E11.5 * Ctrl |
| 10557992 | Bag3          | NM_013863     | 1.77809e-008 | 2.0618  | E11.5 * Wnt1 up vs E11.5 * Ctrl |
| 10490129 | Bmp7          | NM_007557     | 4.3095e-007  | 2.05582 | E11.5 * Wnt1 up vs E11.5 * Ctrl |

|                        |              |               |         |                                 |
|------------------------|--------------|---------------|---------|---------------------------------|
| 10358633 Hmcn1         | NM_001024720 | 9.05307e-005  | 2.05474 | E11.5 * Wnt1 up vs E11.5 * Ctrl |
| 10421810 1190002H23Rik | NM_025427    | 5.79594e-007  | 2.05387 | E11.5 * Wnt1 up vs E11.5 * Ctrl |
| 10607156 Dcx           | NM_001110222 | 2.5309e-006   | 2.05351 | E11.5 * Wnt1 up vs E11.5 * Ctrl |
| 10542414 Ptpro         | NM_011216    | 1.26797e-006  | 2.05193 | E11.5 * Wnt1 up vs E11.5 * Ctrl |
| 10599654 Cxx1c         | NM_028375    | 2.11298e-006  | 2.05124 | E11.5 * Wnt1 up vs E11.5 * Ctrl |
| 10556463 Arntl         | NM_007489    | 2.31013e-008  | 2.05058 | E11.5 * Wnt1 up vs E11.5 * Ctrl |
| 10485402 Fjx1          | NM_010218    | 5.31068e-011  | 2.04417 | E11.5 * Wnt1 up vs E11.5 * Ctrl |
| 10470564 Ralgds        | NM_001145835 | 2.79203e-006  | 2.04351 | E11.5 * Wnt1 up vs E11.5 * Ctrl |
| 10481056 Notch1        | NM_008714    | 1.02572e-005  | 2.03533 | E11.5 * Wnt1 up vs E11.5 * Ctrl |
| 10468311 Sh3pxd2a      | NM_008018    | 1.97792e-006  | 2.03481 | E11.5 * Wnt1 up vs E11.5 * Ctrl |
| 10503902 Cnr1          | NM_007726    | 1.51776e-006  | 2.0318  | E11.5 * Wnt1 up vs E11.5 * Ctrl |
| 10459671 Dcc           | NM_007831    | 7.93999e-009  | 2.03127 | E11.5 * Wnt1 up vs E11.5 * Ctrl |
| 10350742 Rnasel        | NM_011882    | 0.000103174   | 2.02562 | E11.5 * Wnt1 up vs E11.5 * Ctrl |
| 10588509 Pcbp4         | NM_021567    | 0.000176617   | 2.02374 | E11.5 * Wnt1 up vs E11.5 * Ctrl |
| 10345777 Il1rl2        | NM_133193    | 6.25672e-005  | 2.02258 | E11.5 * Wnt1 up vs E11.5 * Ctrl |
| 10520304 Actr3b        | NM_001004365 | 1.40443e-006  | 2.01992 | E11.5 * Wnt1 up vs E11.5 * Ctrl |
| 10358587 Hmcn1         | NM_001024720 | 0.000330018   | 2.01921 | E11.5 * Wnt1 up vs E11.5 * Ctrl |
| 10449034 Fam173a       | BC096050     | 1.30099e-007  | 2.01676 | E11.5 * Wnt1 up vs E11.5 * Ctrl |
| 10503188 Chd7          | NM_001081417 | 8.6295e-006   | 2.01506 | E11.5 * Wnt1 up vs E11.5 * Ctrl |
| 10476759 Rin2          | NM_028724    | 2.43307e-007  | 2.01455 | E11.5 * Wnt1 up vs E11.5 * Ctrl |
| 10595371 Hmgn3         | NM_026122    | 2.76032e-006  | 2.01424 | E11.5 * Wnt1 up vs E11.5 * Ctrl |
| 10576639 Nrp1          | NM_008737    | 7.17892e-008  | 2.00933 | E11.5 * Wnt1 up vs E11.5 * Ctrl |
| 10526191 Gatsl2        | BC026208     | 1.51643e-006  | 2.00334 | E11.5 * Wnt1 up vs E11.5 * Ctrl |
| 10596812 6230427J02Rik | NM_026597    | 9.93708e-008  | 2.00238 | E11.5 * Wnt1 up vs E11.5 * Ctrl |
| 10358521 Hmcn1         | NM_001024720 | 0.000732485   | 1.98233 | E11.5 * Wnt1 up vs E11.5 * Ctrl |
| 10503174 Chd7          | NM_001081417 | 2.63018e-007  | 1.98214 | E11.5 * Wnt1 up vs E11.5 * Ctrl |
| 10503192 Chd7          | NM_001081417 | 1.27436e-006  | 1.98204 | E11.5 * Wnt1 up vs E11.5 * Ctrl |
| 10358605 Hmcn1         | NM_001024720 | 2.95829e-006  | 1.98162 | E11.5 * Wnt1 up vs E11.5 * Ctrl |
| 10462918 Tmem20        | NM_175507    | 4.05347e-009  | 1.97826 | E11.5 * Wnt1 up vs E11.5 * Ctrl |
| 10495623 ENSMUSG00000  | ENSMUST00000 | 0.000519806   | 1.977   | E11.5 * Wnt1 up vs E11.5 * Ctrl |
| 10392449 Wipi1         | NM_145940    | 1.05703e-006  | 1.97564 | E11.5 * Wnt1 up vs E11.5 * Ctrl |
| 10577586 Ap3m2         | NM_001122820 | 4.12852e-008  | 1.97351 | E11.5 * Wnt1 up vs E11.5 * Ctrl |
| 10503170 Chd7          | NM_001081417 | 3.62788e-009  | 1.97257 | E11.5 * Wnt1 up vs E11.5 * Ctrl |
| 10363455 Pcbd1         | NM_025273    | 4.11725e-006  | 1.96728 | E11.5 * Wnt1 up vs E11.5 * Ctrl |
| 10402283 Itpk1         | NM_172584    | 0.000309564   | 1.96682 | E11.5 * Wnt1 up vs E11.5 * Ctrl |
| 10503168 Chd7          | NM_001081417 | 2.46646e-007  | 1.96668 | E11.5 * Wnt1 up vs E11.5 * Ctrl |
| 10462683 Pcgf5         | NM_029508    | 1.5324e-005   | 1.96652 | E11.5 * Wnt1 up vs E11.5 * Ctrl |
| 10494200 Cdc42se1      | NM_172395    | 6.77887e-007  | 1.96582 | E11.5 * Wnt1 up vs E11.5 * Ctrl |
| 10366391 Kcnc2         | NM_001025581 | 2.26471e-006  | 1.96559 | E11.5 * Wnt1 up vs E11.5 * Ctrl |
| 10602090 Atg4a         | NM_174875    | 2.6211e-006   | 1.9647  | E11.5 * Wnt1 up vs E11.5 * Ctrl |
| 10464283 ENSMUSG00000  | ENSMUST00000 | 0.284126e-007 | 1.9632  | E11.5 * Wnt1 up vs E11.5 * Ctrl |
| 10499093               | ---          | 8.96921e-006  | 1.96215 | E11.5 * Wnt1 up vs E11.5 * Ctrl |
| 10353632 Bai3          | NM_175642    | 2.07322e-007  | 1.95898 | E11.5 * Wnt1 up vs E11.5 * Ctrl |
| 10575019 ENSMUSG00000  | ENSMUST00000 | 0.00826294    | 1.95736 | E11.5 * Wnt1 up vs E11.5 * Ctrl |
| 10503161 Chd7          | NM_001081417 | 7.95942e-009  | 1.95587 | E11.5 * Wnt1 up vs E11.5 * Ctrl |
| 10399421 Mycn          | NM_008709    | 3.39508e-007  | 1.95565 | E11.5 * Wnt1 up vs E11.5 * Ctrl |
| 10435789 Zbtb20        | ENSMUST00000 | 0.47787e-006  | 1.95457 | E11.5 * Wnt1 up vs E11.5 * Ctrl |
| 10544906 Ggct          | NM_026637    | 1.23513e-006  | 1.95317 | E11.5 * Wnt1 up vs E11.5 * Ctrl |
| 10381939 Tanc2         | NM_181071    | 5.81361e-008  | 1.95219 | E11.5 * Wnt1 up vs E11.5 * Ctrl |
| 10495854 Prss12        | NM_008939    | 5.91397e-008  | 1.95217 | E11.5 * Wnt1 up vs E11.5 * Ctrl |
| 10358535 Hmcn1         | NM_001024720 | 8.53424e-006  | 1.9521  | E11.5 * Wnt1 up vs E11.5 * Ctrl |
| 10358631 Hmcn1         | NM_001024720 | 7.20002e-005  | 1.95167 | E11.5 * Wnt1 up vs E11.5 * Ctrl |
| 10492826 Fbxw7         | NM_080428    | 2.5623e-010   | 1.95136 | E11.5 * Wnt1 up vs E11.5 * Ctrl |
| 10460118 Socs6         | NM_018821    | 1.29913e-006  | 1.94779 | E11.5 * Wnt1 up vs E11.5 * Ctrl |
| 10391084 Hap1          | NM_010404    | 9.09404e-007  | 1.94724 | E11.5 * Wnt1 up vs E11.5 * Ctrl |
| 10474141 Slc1a2        | NM_001077514 | 2.56221e-006  | 1.94619 | E11.5 * Wnt1 up vs E11.5 * Ctrl |
| 10368981 Lin28b        | NM_001031772 | 5.67129e-007  | 1.94132 | E11.5 * Wnt1 up vs E11.5 * Ctrl |
| 10508651 Sdc3          | NM_011520    | 4.01019e-006  | 1.93934 | E11.5 * Wnt1 up vs E11.5 * Ctrl |
| 10358525 Hmcn1         | NM_001024720 | 6.56722e-006  | 1.93837 | E11.5 * Wnt1 up vs E11.5 * Ctrl |
| 10480329 Dnajc1        | NM_007869    | 9.88145e-007  | 1.93592 | E11.5 * Wnt1 up vs E11.5 * Ctrl |
| 10416887 Slain1        | NM_198014    | 1.49073e-005  | 1.93506 | E11.5 * Wnt1 up vs E11.5 * Ctrl |
| 10414417 Peli2         | NM_033602    | 9.24494e-008  | 1.93478 | E11.5 * Wnt1 up vs E11.5 * Ctrl |
| 10448081 Rgmb          | NM_178615    | 8.0264e-011   | 1.9337  | E11.5 * Wnt1 up vs E11.5 * Ctrl |
| 10367746 Sash1         | NM_175155    | 1.05817e-007  | 1.93264 | E11.5 * Wnt1 up vs E11.5 * Ctrl |
| 10458685 Jakmip2       | ENSMUST00000 | 0.000134892   | 1.93179 | E11.5 * Wnt1 up vs E11.5 * Ctrl |
| 10441456 Synj2         | NM_011523    | 1.26339e-007  | 1.93144 | E11.5 * Wnt1 up vs E11.5 * Ctrl |

|                        |               |              |         |                                 |
|------------------------|---------------|--------------|---------|---------------------------------|
| 10358575 Hmcn1         | NM_001024720  | 1.17578e-005 | 1.93049 | E11.5 * Wnt1 up vs E11.5 * Ctrl |
| 10358551 Hmcn1         | NM_001024720  | 2.81868e-005 | 1.92504 | E11.5 * Wnt1 up vs E11.5 * Ctrl |
| 10358637 Hmcn1         | NM_001024720  | 6.27309e-006 | 1.92299 | E11.5 * Wnt1 up vs E11.5 * Ctrl |
| 10454286 Mapre2        | NM_153058     | 5.41758e-010 | 1.92269 | E11.5 * Wnt1 up vs E11.5 * Ctrl |
| 10466976 Gldc          | NM_138595     | 7.26557e-007 | 1.92182 | E11.5 * Wnt1 up vs E11.5 * Ctrl |
| 10358607 Hmcn1         | NM_001024720  | 1.84983e-006 | 1.91665 | E11.5 * Wnt1 up vs E11.5 * Ctrl |
| 10549594 Ttyh1         | NM_021324     | 3.33887e-008 | 1.91486 | E11.5 * Wnt1 up vs E11.5 * Ctrl |
| 10421046 Dock5         | NM_177780     | 5.8747e-010  | 1.91174 | E11.5 * Wnt1 up vs E11.5 * Ctrl |
| 10503204 Chd7          | NM_001081417  | 1.9054e-006  | 1.90869 | E11.5 * Wnt1 up vs E11.5 * Ctrl |
| 10383309               | ---           | 0.00376231   | 1.90735 | E11.5 * Wnt1 up vs E11.5 * Ctrl |
| 10571312 Dusp4         | NM_176933     | 2.18465e-005 | 1.90412 | E11.5 * Wnt1 up vs E11.5 * Ctrl |
| 10598833 Chst7         | NM_021715     | 0.000369737  | 1.90302 | E11.5 * Wnt1 up vs E11.5 * Ctrl |
| 10408359 Nrsn1         | NM_009513     | 2.3105e-005  | 1.90071 | E11.5 * Wnt1 up vs E11.5 * Ctrl |
| 10358613 Hmcn1         | NM_001024720  | 3.32233e-005 | 1.90056 | E11.5 * Wnt1 up vs E11.5 * Ctrl |
| 10513869 Megf9         | NM_172694     | 2.81638e-010 | 1.90003 | E11.5 * Wnt1 up vs E11.5 * Ctrl |
| 10420988 Dpysl2        | NM_009955     | 2.91972e-005 | 1.89979 | E11.5 * Wnt1 up vs E11.5 * Ctrl |
| 10568735 Ebf3          | NM_001113415  | 2.00065e-007 | 1.89736 | E11.5 * Wnt1 up vs E11.5 * Ctrl |
| 10406852 Cnn3          | NM_028044     | 8.87438e-005 | 1.89361 | E11.5 * Wnt1 up vs E11.5 * Ctrl |
| 10428857 Mtss1         | NM_001146180  | 5.63845e-008 | 1.89337 | E11.5 * Wnt1 up vs E11.5 * Ctrl |
| 10392910 C630004H02Rik | BC024617      | 0.00048129   | 1.89239 | E11.5 * Wnt1 up vs E11.5 * Ctrl |
| 10358529 Hmcn1         | NM_001024720  | 4.60516e-006 | 1.8872  | E11.5 * Wnt1 up vs E11.5 * Ctrl |
| 10501456 Fam102b       | ENSMUST00000i | 4.23996e-007 | 1.88637 | E11.5 * Wnt1 up vs E11.5 * Ctrl |
| 10358490 Hmcn1         | NM_001024720  | 3.03668e-007 | 1.88037 | E11.5 * Wnt1 up vs E11.5 * Ctrl |
| 10358553 Hmcn1         | NM_001024720  | 0.000626848  | 1.87938 | E11.5 * Wnt1 up vs E11.5 * Ctrl |
| 10599120 Dock11        | NM_001009947  | 3.83483e-007 | 1.87659 | E11.5 * Wnt1 up vs E11.5 * Ctrl |
| 10399457 Akr1b3        | NM_009658     | 7.17309e-008 | 1.87447 | E11.5 * Wnt1 up vs E11.5 * Ctrl |
| 10468668 Afap1l2       | NM_146102     | 8.6816e-005  | 1.87335 | E11.5 * Wnt1 up vs E11.5 * Ctrl |
| 10582162 Cofil         | NM_028071     | 0.000694911  | 1.87203 | E11.5 * Wnt1 up vs E11.5 * Ctrl |
| 10362005 Ahi1          | NM_026203     | 2.00188e-006 | 1.87159 | E11.5 * Wnt1 up vs E11.5 * Ctrl |
| 10498210 Nbea          | NM_030595     | 2.9133e-010  | 1.87144 | E11.5 * Wnt1 up vs E11.5 * Ctrl |
| 10407481 Pfkf          | NM_019703     | 1.88282e-006 | 1.87012 | E11.5 * Wnt1 up vs E11.5 * Ctrl |
| 10358595 Hmcn1         | NM_001024720  | 4.87673e-005 | 1.87001 | E11.5 * Wnt1 up vs E11.5 * Ctrl |
| 10406817 Enc1          | NM_007930     | 2.34097e-007 | 1.86944 | E11.5 * Wnt1 up vs E11.5 * Ctrl |
| 10358650 Hmcn1         | NM_001024720  | 2.6967e-006  | 1.86904 | E11.5 * Wnt1 up vs E11.5 * Ctrl |
| 10408613 Tubb2b        | NM_023716     | 8.59e-005    | 1.86809 | E11.5 * Wnt1 up vs E11.5 * Ctrl |
| 10595496 Snap91        | NM_013669     | 2.95933e-005 | 1.86414 | E11.5 * Wnt1 up vs E11.5 * Ctrl |
| 10455942 A730017C20Rik | NM_173759     | 2.00857e-005 | 1.86269 | E11.5 * Wnt1 up vs E11.5 * Ctrl |
| 10426656 Prph          | NM_013639     | 1.75033e-006 | 1.86126 | E11.5 * Wnt1 up vs E11.5 * Ctrl |
| 10375432 C030019I05Rik | NM_177075     | 0.000665995  | 1.8582  | E11.5 * Wnt1 up vs E11.5 * Ctrl |
| 10408450 Sox4          | NM_009238     | 1.79313e-005 | 1.85742 | E11.5 * Wnt1 up vs E11.5 * Ctrl |
| 10571860 Hand2         | NM_010402     | 1.75767e-007 | 1.8559  | E11.5 * Wnt1 up vs E11.5 * Ctrl |
| 10538338 Creb5         | NM_172728     | 6.568e-009   | 1.85588 | E11.5 * Wnt1 up vs E11.5 * Ctrl |
| 10469151 Itih5         | NM_172471     | 9.58317e-008 | 1.85582 | E11.5 * Wnt1 up vs E11.5 * Ctrl |
| 10425945 Fbln1         | NM_010180     | 3.48093e-006 | 1.85411 | E11.5 * Wnt1 up vs E11.5 * Ctrl |
| 10406845 Foxd1         | NM_008242     | 0.00686457   | 1.8541  | E11.5 * Wnt1 up vs E11.5 * Ctrl |
| 10451679 Daam2         | NM_001008231  | 1.30227e-006 | 1.85289 | E11.5 * Wnt1 up vs E11.5 * Ctrl |
| 10354741 Rftn2         | NM_028713     | 2.03203e-008 | 1.85249 | E11.5 * Wnt1 up vs E11.5 * Ctrl |
| 10588283 Rab6b         | NM_173781     | 0.000208034  | 1.85129 | E11.5 * Wnt1 up vs E11.5 * Ctrl |
| 10595831 Zbtb38        | NM_175537     | 1.54404e-006 | 1.8498  | E11.5 * Wnt1 up vs E11.5 * Ctrl |
| 10358627 Hmcn1         | NM_001024720  | 9.3543e-006  | 1.84792 | E11.5 * Wnt1 up vs E11.5 * Ctrl |
| 10345172 ENSMUSG0000C  | ENSMUST00000i | 0.000283962  | 1.84561 | E11.5 * Wnt1 up vs E11.5 * Ctrl |
| 10452295 Tubb4         | NM_009451     | 5.17576e-005 | 1.84364 | E11.5 * Wnt1 up vs E11.5 * Ctrl |
| 10374406 Cnrip1        | NM_029861     | 2.64194e-007 | 1.8429  | E11.5 * Wnt1 up vs E11.5 * Ctrl |
| 10350896 Astn1         | NM_007495     | 1.85284e-006 | 1.83515 | E11.5 * Wnt1 up vs E11.5 * Ctrl |
| 10564482 Synm          | NM_201639     | 9.42364e-008 | 1.83387 | E11.5 * Wnt1 up vs E11.5 * Ctrl |
| 10566767 St5           | NM_001001326  | 1.70172e-006 | 1.83264 | E11.5 * Wnt1 up vs E11.5 * Ctrl |
| 10445879 Kcnh8         | NM_001031811  | 0.000185608  | 1.83141 | E11.5 * Wnt1 up vs E11.5 * Ctrl |
| 10358577 Hmcn1         | NM_001024720  | 0.000159413  | 1.83064 | E11.5 * Wnt1 up vs E11.5 * Ctrl |
| 10376017 ENSMUSG0000C  | ENSMUST00000i | 0.000172525  | 1.83044 | E11.5 * Wnt1 up vs E11.5 * Ctrl |
| 10358623 Hmcn1         | NM_001024720  | 8.47474e-006 | 1.8294  | E11.5 * Wnt1 up vs E11.5 * Ctrl |
| 10358648 Hmcn1         | NM_001024720  | 3.49332e-005 | 1.82875 | E11.5 * Wnt1 up vs E11.5 * Ctrl |
| 10429160 St3gal1       | NM_009177     | 5.75325e-006 | 1.82673 | E11.5 * Wnt1 up vs E11.5 * Ctrl |
| 10379936 Tbx2          | NM_009324     | 0.00063e-005 | 1.82122 | E11.5 * Wnt1 up vs E11.5 * Ctrl |
| 10450603               | ---           | 0.00280764   | 1.82031 | E11.5 * Wnt1 up vs E11.5 * Ctrl |
| 10459835               | ---           | 2.94811e-005 | 1.81994 | E11.5 * Wnt1 up vs E11.5 * Ctrl |
| 10600688 Map3k7ip3     | NM_025729     | 4.60996e-007 | 1.81856 | E11.5 * Wnt1 up vs E11.5 * Ctrl |

|          |               |               |              |         |                                 |
|----------|---------------|---------------|--------------|---------|---------------------------------|
| 10404975 | Id4           | NM_031166     | 2.07931e-006 | 1.81801 | E11.5 * Wnt1 up vs E11.5 * Ctrl |
| 10358597 | Hmcn1         | NM_001024720  | 0.000234196  | 1.8153  | E11.5 * Wnt1 up vs E11.5 * Ctrl |
| 10406456 | AY512938      | AY512938      | 0.00106322   | 1.8144  | E11.5 * Wnt1 up vs E11.5 * Ctrl |
| 10358513 | Hmcn1         | NM_001024720  | 0.000724083  | 1.81429 | E11.5 * Wnt1 up vs E11.5 * Ctrl |
| 10550915 | Cadm4         | NM_153112     | 7.96049e-005 | 1.81429 | E11.5 * Wnt1 up vs E11.5 * Ctrl |
| 10492335 | Rap2b         | NM_028712     | 1.81856e-007 | 1.81211 | E11.5 * Wnt1 up vs E11.5 * Ctrl |
| 10359917 | Hsd17b7       | NM_010476     | 0.00019855   | 1.81089 | E11.5 * Wnt1 up vs E11.5 * Ctrl |
| 10350697 | Nmnat2        | NM_175460     | 2.12739e-005 | 1.81015 | E11.5 * Wnt1 up vs E11.5 * Ctrl |
| 10358527 | Hmcn1         | NM_001024720  | 3.68677e-005 | 1.80924 | E11.5 * Wnt1 up vs E11.5 * Ctrl |
| 10575777 | 4933407C03Rik | BC158118      | 1.92467e-006 | 1.80924 | E11.5 * Wnt1 up vs E11.5 * Ctrl |
| 10361023 | Prox1         | NM_008937     | 0.000105418  | 1.8081  | E11.5 * Wnt1 up vs E11.5 * Ctrl |
| 10528527 | Fam126a       | NM_053090     | 3.59696e-007 | 1.80762 | E11.5 * Wnt1 up vs E11.5 * Ctrl |
| 10439092 | 1700021K19Rik | BC060601      | 1.07651e-007 | 1.80624 | E11.5 * Wnt1 up vs E11.5 * Ctrl |
| 10592471 | Gramd1b       | NM_172768     | 3.85049e-006 | 1.80622 | E11.5 * Wnt1 up vs E11.5 * Ctrl |
| 10358599 | Hmcn1         | NM_001024720  | 8.90993e-005 | 1.80584 | E11.5 * Wnt1 up vs E11.5 * Ctrl |
| 10579925 | Gab1          | NM_021356     | 8.21928e-009 | 1.80338 | E11.5 * Wnt1 up vs E11.5 * Ctrl |
| 10372338 | EG368203      | NM_203660     | 0.00274463   | 1.79824 | E11.5 * Wnt1 up vs E11.5 * Ctrl |
| 10364502 | Palm          | NM_023128     | 1.34503e-005 | 1.79788 | E11.5 * Wnt1 up vs E11.5 * Ctrl |
| 10474373 | Kcna4         | NM_021275     | 0.000399638  | 1.79693 | E11.5 * Wnt1 up vs E11.5 * Ctrl |
| 10605820 | Zc4h2         | NM_001003916  | 2.14648e-007 | 1.79666 | E11.5 * Wnt1 up vs E11.5 * Ctrl |
| 10433445 | Abat          | NM_172961     | 0.000106897  | 1.79524 | E11.5 * Wnt1 up vs E11.5 * Ctrl |
| 10490159 | Pmepa1        | NM_022995     | 8.72566e-007 | 1.79453 | E11.5 * Wnt1 up vs E11.5 * Ctrl |
| 10454580 | Bin1          | NM_009668     | 7.58201e-005 | 1.79235 | E11.5 * Wnt1 up vs E11.5 * Ctrl |
| 10561369 | BC089491      | NM_175033     | 2.37957e-006 | 1.78756 | E11.5 * Wnt1 up vs E11.5 * Ctrl |
| 10407072 | Elovl7        | NM_029001     | 0.000820283  | 1.78629 | E11.5 * Wnt1 up vs E11.5 * Ctrl |
| 10553773 | Gabrb3        | NM_008071     | 5.20964e-007 | 1.78499 | E11.5 * Wnt1 up vs E11.5 * Ctrl |
| 10599562 | 1100001E04Rik | NM_001081123  | 1.71255e-005 | 1.78268 | E11.5 * Wnt1 up vs E11.5 * Ctrl |
| 10375263 | ENSMUSG0000C  | ENSMUST000000 | 0.00090716   | 1.77984 | E11.5 * Wnt1 up vs E11.5 * Ctrl |
| 10430519 | Csnk1e        | NM_013767     | 1.8743e-006  | 1.77964 | E11.5 * Wnt1 up vs E11.5 * Ctrl |
| 10411274 | Sv2c          | NM_029210     | 2.98855e-006 | 1.77918 | E11.5 * Wnt1 up vs E11.5 * Ctrl |
| 10436456 | Pros1         | NM_011173     | 3.90498e-006 | 1.77522 | E11.5 * Wnt1 up vs E11.5 * Ctrl |
| 10375175 | Slit3         | NM_011412     | 3.31656e-007 | 1.77441 | E11.5 * Wnt1 up vs E11.5 * Ctrl |
| 10375322 | 4933415A04Rik | ENSMUST000000 | 2.04999e-006 | 1.77132 | E11.5 * Wnt1 up vs E11.5 * Ctrl |
| 10509127 | Fuca1         | NM_024243     | 9.83929e-007 | 1.76633 | E11.5 * Wnt1 up vs E11.5 * Ctrl |
| 10492355 | Mme           | NM_008604     | 0.000793227  | 1.76626 | E11.5 * Wnt1 up vs E11.5 * Ctrl |
| 10575775 | 4933407C03Rik | BC158118      | 1.08528e-006 | 1.7647  | E11.5 * Wnt1 up vs E11.5 * Ctrl |
| 10590844 | 9030420J04Rik | BC137891      | 1.5813e-007  | 1.76453 | E11.5 * Wnt1 up vs E11.5 * Ctrl |
| 10397912 | 9030205A07Rik | AB257853      | 5.75275e-007 | 1.7644  | E11.5 * Wnt1 up vs E11.5 * Ctrl |
| 10590860 | 9030420J04Rik | BC137891      | 5.8132e-006  | 1.76145 | E11.5 * Wnt1 up vs E11.5 * Ctrl |
| 10358531 | Hmcn1         | NM_001024720  | 8.3707e-005  | 1.75916 | E11.5 * Wnt1 up vs E11.5 * Ctrl |
| 10472794 | Metap1        | NM_025633     | 1.94357e-005 | 1.75696 | E11.5 * Wnt1 up vs E11.5 * Ctrl |
| 10385283 | Gabrg2        | NM_008073     | 0.000104586  | 1.75533 | E11.5 * Wnt1 up vs E11.5 * Ctrl |
| 10578493 | Tlr3          | NM_126166     | 0.000258787  | 1.755   | E11.5 * Wnt1 up vs E11.5 * Ctrl |
| 10457820 | Nol4          | NM_199024     | 4.17937e-005 | 1.75488 | E11.5 * Wnt1 up vs E11.5 * Ctrl |
| 10593196 | ENSMUSG0000C  | ENSMUST000000 | 7.62967e-007 | 1.75392 | E11.5 * Wnt1 up vs E11.5 * Ctrl |
| 10438626 | Etv5          | NM_023794     | 5.54467e-005 | 1.75149 | E11.5 * Wnt1 up vs E11.5 * Ctrl |
| 10459552 | Spire1        | NM_194355     | 1.06619e-008 | 1.75135 | E11.5 * Wnt1 up vs E11.5 * Ctrl |
| 10575497 | Mtss1l        | NM_198625     | 5.85568e-005 | 1.75072 | E11.5 * Wnt1 up vs E11.5 * Ctrl |
| 10466712 | Mamdc2        | NM_174857     | 2.94093e-006 | 1.75053 | E11.5 * Wnt1 up vs E11.5 * Ctrl |
| 10372557 | Gm239         | NM_001033333  | 4.74337e-005 | 1.75053 | E11.5 * Wnt1 up vs E11.5 * Ctrl |
| 10407841 | Hecw1         | NM_001081348  | 0.000742573  | 1.74994 | E11.5 * Wnt1 up vs E11.5 * Ctrl |
| 10411171 | Pde8b         | NM_172263     | 9.37692e-008 | 1.74545 | E11.5 * Wnt1 up vs E11.5 * Ctrl |
| 10458555 | Spry4         | NM_011898     | 2.94876e-005 | 1.74533 | E11.5 * Wnt1 up vs E11.5 * Ctrl |
| 10363161 | 6330442E10Rik | BC079613      | 0.00073547   | 1.74468 | E11.5 * Wnt1 up vs E11.5 * Ctrl |
| 10434165 | Arvcf         | NM_033474     | 2.23356e-006 | 1.74379 | E11.5 * Wnt1 up vs E11.5 * Ctrl |
| 10503259 | Trp53inp1     | NM_021897     | 4.71398e-007 | 1.74365 | E11.5 * Wnt1 up vs E11.5 * Ctrl |
| 10381082 | Rara          | NM_009024     | 4.19262e-005 | 1.74356 | E11.5 * Wnt1 up vs E11.5 * Ctrl |
| 10540233 | Fam19a1       | NM_182808     | 2.62212e-005 | 1.74059 | E11.5 * Wnt1 up vs E11.5 * Ctrl |
| 10607302 | Gnl3l         | NM_198110     | 5.22677e-009 | 1.74003 | E11.5 * Wnt1 up vs E11.5 * Ctrl |
| 10476443 | Plcb4         | NM_013829     | 4.26689e-007 | 1.73954 | E11.5 * Wnt1 up vs E11.5 * Ctrl |
| 10460100 | ---           | ---           | 1.19316e-005 | 1.73909 | E11.5 * Wnt1 up vs E11.5 * Ctrl |
| 10590383 | Deb1          | NM_026794     | 9.99269e-008 | 1.73906 | E11.5 * Wnt1 up vs E11.5 * Ctrl |
| 10358537 | Hmcn1         | NM_001024720  | 6.61439e-007 | 1.7387  | E11.5 * Wnt1 up vs E11.5 * Ctrl |
| 10352503 | Bpnt1         | NM_011794     | 2.20563e-005 | 1.73829 | E11.5 * Wnt1 up vs E11.5 * Ctrl |
| 10358609 | Hmcn1         | NM_001024720  | 4.74718e-005 | 1.73649 | E11.5 * Wnt1 up vs E11.5 * Ctrl |
| 10462702 | Hectd2        | NM_172637     | 5.18272e-005 | 1.73641 | E11.5 * Wnt1 up vs E11.5 * Ctrl |

|                        |               |              |         |                                 |
|------------------------|---------------|--------------|---------|---------------------------------|
| 10426798 Smarcd1       | NM_031842     | 7.2188e-006  | 1.7364  | E11.5 * Wnt1 up vs E11.5 * Ctrl |
| 10439009 Apod          | NM_007470     | 4.90874e-005 | 1.73604 | E11.5 * Wnt1 up vs E11.5 * Ctrl |
| 10490794 Pkia          | NM_008862     | 2.79609e-005 | 1.73402 | E11.5 * Wnt1 up vs E11.5 * Ctrl |
| 10392388 Prkca         | NM_011101     | 4.57208e-007 | 1.73326 | E11.5 * Wnt1 up vs E11.5 * Ctrl |
| 10444932 2310014H01Rik | NM_001146711  | 5.52844e-006 | 1.73218 | E11.5 * Wnt1 up vs E11.5 * Ctrl |
| 10573172 Clgn          | NM_009904     | 1.46878e-005 | 1.72986 | E11.5 * Wnt1 up vs E11.5 * Ctrl |
| 10359849 Uck2          | ENSMUST000001 | 0.00324412   | 1.72949 | E11.5 * Wnt1 up vs E11.5 * Ctrl |
| 10516371 Eif2c1        | NM_153403     | 5.45734e-006 | 1.72936 | E11.5 * Wnt1 up vs E11.5 * Ctrl |
| 10569370 Th            | NM_009377     | 1.97492e-006 | 1.72819 | E11.5 * Wnt1 up vs E11.5 * Ctrl |
| 10358625 Hmcn1         | NM_001024720  | 0.000272653  | 1.72766 | E11.5 * Wnt1 up vs E11.5 * Ctrl |
| 10470314               | ---           | 0.00401972   | 1.72724 | E11.5 * Wnt1 up vs E11.5 * Ctrl |
| 10422249 Dct           | NM_010024     | 0.000148983  | 1.72579 | E11.5 * Wnt1 up vs E11.5 * Ctrl |
| 10538732 Grid2         | NM_008167     | 5.32745e-005 | 1.72563 | E11.5 * Wnt1 up vs E11.5 * Ctrl |
| 10408838 Elovl2        | NM_019423     | 5.34904e-005 | 1.72509 | E11.5 * Wnt1 up vs E11.5 * Ctrl |
| 10542369 EG668137      | NM_001142734  | 1.2841e-005  | 1.7249  | E11.5 * Wnt1 up vs E11.5 * Ctrl |
| 10589913 Dync1li1      | NM_146229     | 5.6159e-007  | 1.72438 | E11.5 * Wnt1 up vs E11.5 * Ctrl |
| 10436978 Cbr3          | NM_173047     | 0.00317074   | 1.72366 | E11.5 * Wnt1 up vs E11.5 * Ctrl |
| 10506150 Foxd3         | NM_010425     | 0.000653477  | 1.72239 | E11.5 * Wnt1 up vs E11.5 * Ctrl |
| 10492448 Ptx3          | NM_008987     | 0.00116376   | 1.72209 | E11.5 * Wnt1 up vs E11.5 * Ctrl |
| 10354494 Nab1          | NM_008667     | 3.26389e-006 | 1.72197 | E11.5 * Wnt1 up vs E11.5 * Ctrl |
| 10462005 Tmem2         | NM_031997     | 1.15232e-007 | 1.72144 | E11.5 * Wnt1 up vs E11.5 * Ctrl |
| 10496091 Lef1          | NM_010703     | 6.29464e-006 | 1.71803 | E11.5 * Wnt1 up vs E11.5 * Ctrl |
| 10427796 Npr3          | NM_008728     | 7.86526e-007 | 1.71493 | E11.5 * Wnt1 up vs E11.5 * Ctrl |
| 10438017 Fgd4          | NM_139232     | 8.36966e-006 | 1.71024 | E11.5 * Wnt1 up vs E11.5 * Ctrl |
| 10415911 Kif13b        | NM_001081177  | 2.37026e-005 | 1.70917 | E11.5 * Wnt1 up vs E11.5 * Ctrl |
| 10389581 Ypel2         | NM_001005341  | 4.39135e-007 | 1.70915 | E11.5 * Wnt1 up vs E11.5 * Ctrl |
| 10578521 Snx25         | NM_207213     | 9.01257e-007 | 1.70875 | E11.5 * Wnt1 up vs E11.5 * Ctrl |
| 10483604 Slc25a12      | NM_172436     | 3.61036e-006 | 1.70816 | E11.5 * Wnt1 up vs E11.5 * Ctrl |
| 10518408 Plod1         | NM_011122     | 6.06563e-005 | 1.70803 | E11.5 * Wnt1 up vs E11.5 * Ctrl |
| 10446777 Ehd3          | NM_020578     | 2.62247e-005 | 1.70775 | E11.5 * Wnt1 up vs E11.5 * Ctrl |
| 10561376 Dll3          | NM_007866     | 4.30234e-006 | 1.70595 | E11.5 * Wnt1 up vs E11.5 * Ctrl |
| 10404848 Jarid2        | NM_021878     | 8.1397e-010  | 1.70489 | E11.5 * Wnt1 up vs E11.5 * Ctrl |
| 10560919 Atp1a3        | NM_144921     | 0.000990063  | 1.70447 | E11.5 * Wnt1 up vs E11.5 * Ctrl |
| 10405343 Tspan17       | NM_028841     | 7.11361e-006 | 1.70415 | E11.5 * Wnt1 up vs E11.5 * Ctrl |
| 10510125 9430007A20Rik | ENSMUST000001 | 0.000783281  | 1.70176 | E11.5 * Wnt1 up vs E11.5 * Ctrl |
| 10493114 Nes           | NM_016701     | 0.0013284    | 1.70037 | E11.5 * Wnt1 up vs E11.5 * Ctrl |
| 10358629 Hmcn1         | NM_001024720  | 0.000205548  | 1.69979 | E11.5 * Wnt1 up vs E11.5 * Ctrl |
| 10355176 4921521F21Rik | BC051128      | 2.15781e-005 | 1.69928 | E11.5 * Wnt1 up vs E11.5 * Ctrl |
| 10506452 AY512949      | AY512949      | 0.00136978   | 1.69886 | E11.5 * Wnt1 up vs E11.5 * Ctrl |
| 10488709 8430427H17Rik | NM_001134300  | 3.45742e-006 | 1.69823 | E11.5 * Wnt1 up vs E11.5 * Ctrl |
| 10441361 Tiam2         | NM_001122998  | 4.90591e-006 | 1.69815 | E11.5 * Wnt1 up vs E11.5 * Ctrl |
| 10478364 Tox2          | NM_001098799  | 2.58884e-006 | 1.69789 | E11.5 * Wnt1 up vs E11.5 * Ctrl |
| 10504234 Unc13b        | NM_001081413  | 2.31396e-007 | 1.69711 | E11.5 * Wnt1 up vs E11.5 * Ctrl |
| 10358652 Hmcn1         | NM_001024720  | 1.25762e-005 | 1.69675 | E11.5 * Wnt1 up vs E11.5 * Ctrl |
| 10402560 A130014H13Rik | AK079474      | 0.00240606   | 1.69661 | E11.5 * Wnt1 up vs E11.5 * Ctrl |
| 10536805 Fam71f1       | NM_207258     | 1.94049e-005 | 1.69661 | E11.5 * Wnt1 up vs E11.5 * Ctrl |
| 10496727 Ddah1         | NM_026993     | 3.51157e-007 | 1.69583 | E11.5 * Wnt1 up vs E11.5 * Ctrl |
| 10524684 Msi1          | NM_008629     | 0.000414782  | 1.69567 | E11.5 * Wnt1 up vs E11.5 * Ctrl |
| 10514561 E130114P18Rik | ENSMUST000001 | 6.34187e-005 | 1.69558 | E11.5 * Wnt1 up vs E11.5 * Ctrl |
| 10358601 Hmcn1         | NM_001024720  | 0.000177918  | 1.69313 | E11.5 * Wnt1 up vs E11.5 * Ctrl |
| 10384138 Tmed4         | NM_134020     | 0.000300591  | 1.69008 | E11.5 * Wnt1 up vs E11.5 * Ctrl |
| 10527965 Cldn12        | NM_022890     | 0.00137222   | 1.6885  | E11.5 * Wnt1 up vs E11.5 * Ctrl |
| 10425158 Pdxp          | NM_020271     | 4.81814e-005 | 1.68713 | E11.5 * Wnt1 up vs E11.5 * Ctrl |
| 10400357 Baz1a         | NM_013815     | 1.53301e-005 | 1.68683 | E11.5 * Wnt1 up vs E11.5 * Ctrl |
| 10459827 Rnf165        | ENSMUST000001 | 1.82264e-007 | 1.68474 | E11.5 * Wnt1 up vs E11.5 * Ctrl |
| 10358660 Hmcn1         | NM_001024720  | 0.000256124  | 1.68389 | E11.5 * Wnt1 up vs E11.5 * Ctrl |
| 10538247 Npy           | NM_023456     | 0.000245892  | 1.68309 | E11.5 * Wnt1 up vs E11.5 * Ctrl |
| 10437580               | ---           | 0.000216654  | 1.68242 | E11.5 * Wnt1 up vs E11.5 * Ctrl |
| 10358656 Hmcn1         | NM_001024720  | 1.46556e-006 | 1.68162 | E11.5 * Wnt1 up vs E11.5 * Ctrl |
| 10593671 Dmxl2         | NM_172771     | 4.71579e-007 | 1.68161 | E11.5 * Wnt1 up vs E11.5 * Ctrl |
| 10370072 Prmt2         | NM_133182     | 8.65449e-005 | 1.68134 | E11.5 * Wnt1 up vs E11.5 * Ctrl |
| 10392369 Cacng4        | NM_019431     | 3.66992e-006 | 1.6811  | E11.5 * Wnt1 up vs E11.5 * Ctrl |
| 10523595 Ptpn13        | NM_011204     | 7.66554e-009 | 1.68015 | E11.5 * Wnt1 up vs E11.5 * Ctrl |
| 10483626 Dlx2          | NM_010054     | 3.99127e-006 | 1.67977 | E11.5 * Wnt1 up vs E11.5 * Ctrl |
| 10558971 Ap2a2         | NM_007459     | 1.46588e-006 | 1.67943 | E11.5 * Wnt1 up vs E11.5 * Ctrl |
| 10374106 Ykt6          | NM_019661     | 0.000194195  | 1.67831 | E11.5 * Wnt1 up vs E11.5 * Ctrl |

|          |               |              |              |         |                                 |
|----------|---------------|--------------|--------------|---------|---------------------------------|
| 10463799 | EG329070      | ENSMUST00000 | 1.10686e-007 | 1.67471 | E11.5 * Wnt1 up vs E11.5 * Ctrl |
| 10391146 | Acly          | NM_134037    | 3.51403e-005 | 1.67436 | E11.5 * Wnt1 up vs E11.5 * Ctrl |
| 10460645 | Map3k11       | NM_022012    | 0.00195951   | 1.67408 | E11.5 * Wnt1 up vs E11.5 * Ctrl |
| 10377018 | Myh3          | NM_001099635 | 1.05455e-007 | 1.67283 | E11.5 * Wnt1 up vs E11.5 * Ctrl |
| 10399470 | Trib2         | NM_144551    | 6.86169e-007 | 1.6723  | E11.5 * Wnt1 up vs E11.5 * Ctrl |
| 10358515 | Hmcn1         | NM_001024720 | 0.00687926   | 1.67121 | E11.5 * Wnt1 up vs E11.5 * Ctrl |
| 10357220 | Tmem177       | NM_175106    | 0.000378264  | 1.67108 | E11.5 * Wnt1 up vs E11.5 * Ctrl |
| 10441565 | Rps6ka2       | NM_011299    | 4.85562e-006 | 1.66973 | E11.5 * Wnt1 up vs E11.5 * Ctrl |
| 10364293 | Ube2g2        | NM_019803    | 0.000170742  | 1.6691  | E11.5 * Wnt1 up vs E11.5 * Ctrl |
| 10558001 | Inpp5f        | NM_178641    | 4.24234e-006 | 1.66723 | E11.5 * Wnt1 up vs E11.5 * Ctrl |
| 10564203 | ---           | ---          | 0.00649516   | 1.66502 | E11.5 * Wnt1 up vs E11.5 * Ctrl |
| 10370242 | Pcbp3         | NM_021568    | 1.2075e-006  | 1.66367 | E11.5 * Wnt1 up vs E11.5 * Ctrl |
| 10354768 | Akr1b3        | NM_009658    | 1.73163e-008 | 1.66359 | E11.5 * Wnt1 up vs E11.5 * Ctrl |
| 10541260 | Cecr2         | NM_001128151 | 0.000134199  | 1.66295 | E11.5 * Wnt1 up vs E11.5 * Ctrl |
| 10478897 | Ptpn1         | NM_011201    | 1.52337e-007 | 1.66282 | E11.5 * Wnt1 up vs E11.5 * Ctrl |
| 10472923 | Ak3l1         | NM_009647    | 0.00691897   | 1.66281 | E11.5 * Wnt1 up vs E11.5 * Ctrl |
| 10455374 | Stk32a        | NM_178749    | 1.216e-005   | 1.66123 | E11.5 * Wnt1 up vs E11.5 * Ctrl |
| 10354777 | Satb2         | NM_139146    | 0.000410039  | 1.66077 | E11.5 * Wnt1 up vs E11.5 * Ctrl |
| 10412038 | Zswim6        | NM_145456    | 7.59461e-009 | 1.66    | E11.5 * Wnt1 up vs E11.5 * Ctrl |
| 10534120 | Asl           | NM_133768    | 3.37898e-006 | 1.65973 | E11.5 * Wnt1 up vs E11.5 * Ctrl |
| 10460057 | Tshz1         | NM_001081300 | 5.54133e-006 | 1.65958 | E11.5 * Wnt1 up vs E11.5 * Ctrl |
| 10435769 | Zbtb20        | NM_019778    | 1.22644e-006 | 1.65924 | E11.5 * Wnt1 up vs E11.5 * Ctrl |
| 10483719 | Chn1          | NM_001113246 | 3.73885e-007 | 1.65886 | E11.5 * Wnt1 up vs E11.5 * Ctrl |
| 10381250 | Tubg1         | NM_134024    | 0.000111552  | 1.65881 | E11.5 * Wnt1 up vs E11.5 * Ctrl |
| 10369835 | Phyhipl       | NM_178621    | 3.49396e-005 | 1.65861 | E11.5 * Wnt1 up vs E11.5 * Ctrl |
| 10537146 | Akr1b8        | NM_008012    | 0.00428729   | 1.65826 | E11.5 * Wnt1 up vs E11.5 * Ctrl |
| 10498284 | Wwtr1         | NM_133784    | 3.1721e-007  | 1.65731 | E11.5 * Wnt1 up vs E11.5 * Ctrl |
| 10420846 | Fzd3          | NM_021458    | 2.63812e-007 | 1.65714 | E11.5 * Wnt1 up vs E11.5 * Ctrl |
| 10476301 | Smox          | NM_145533    | 0.000155914  | 1.65675 | E11.5 * Wnt1 up vs E11.5 * Ctrl |
| 10358533 | Hmcn1         | NM_001024720 | 8.29209e-005 | 1.65537 | E11.5 * Wnt1 up vs E11.5 * Ctrl |
| 10436666 | Jam2          | NM_023844    | 8.11448e-006 | 1.6549  | E11.5 * Wnt1 up vs E11.5 * Ctrl |
| 10568651 | Dhx32         | NM_133941    | 2.21928e-006 | 1.65222 | E11.5 * Wnt1 up vs E11.5 * Ctrl |
| 10475643 | Fgf7          | NM_008008    | 0.00240836   | 1.65161 | E11.5 * Wnt1 up vs E11.5 * Ctrl |
| 10595392 | Elovl4        | NM_148941    | 0.00135161   | 1.64836 | E11.5 * Wnt1 up vs E11.5 * Ctrl |
| 10564417 | Aldh1a3       | NM_053080    | 9.49911e-005 | 1.64835 | E11.5 * Wnt1 up vs E11.5 * Ctrl |
| 10392943 | Hn1           | NM_008258    | 9.24334e-006 | 1.64722 | E11.5 * Wnt1 up vs E11.5 * Ctrl |
| 10474814 | Disp2         | NM_170593    | 0.000257159  | 1.64616 | E11.5 * Wnt1 up vs E11.5 * Ctrl |
| 10396476 | Rhoj          | NM_023275    | 4.25617e-005 | 1.64598 | E11.5 * Wnt1 up vs E11.5 * Ctrl |
| 10566846 | Dennd5a       | NM_021494    | 7.28373e-009 | 1.64592 | E11.5 * Wnt1 up vs E11.5 * Ctrl |
| 10378914 | Myo18a        | NM_011586    | 1.68034e-008 | 1.64576 | E11.5 * Wnt1 up vs E11.5 * Ctrl |
| 10554960 | Fam181b       | NM_021427    | 3.33133e-005 | 1.64528 | E11.5 * Wnt1 up vs E11.5 * Ctrl |
| 10464504 | Lrp5          | NM_008513    | 0.00117722   | 1.64468 | E11.5 * Wnt1 up vs E11.5 * Ctrl |
| 10431170 | 5031439G07Rik | NM_001033273 | 1.26613e-005 | 1.64445 | E11.5 * Wnt1 up vs E11.5 * Ctrl |
| 10527516 | Wasf3         | NM_145155    | 3.22487e-005 | 1.64398 | E11.5 * Wnt1 up vs E11.5 * Ctrl |
| 10470696 | Med27         | NM_026896    | 0.000216093  | 1.6435  | E11.5 * Wnt1 up vs E11.5 * Ctrl |
| 10378549 | Rtn4rl1       | NM_177708    | 1.61276e-005 | 1.64058 | E11.5 * Wnt1 up vs E11.5 * Ctrl |
| 10591853 | Tbx20         | NM_194263    | 0.000214703  | 1.64019 | E11.5 * Wnt1 up vs E11.5 * Ctrl |
| 10543859 | Akr1b3        | NM_009658    | 3.67459e-008 | 1.63705 | E11.5 * Wnt1 up vs E11.5 * Ctrl |
| 10527306 | Lmtk2         | NM_001081109 | 6.58538e-007 | 1.63629 | E11.5 * Wnt1 up vs E11.5 * Ctrl |
| 10481830 | Zbtb43        | NM_027947    | 0.000150964  | 1.63484 | E11.5 * Wnt1 up vs E11.5 * Ctrl |
| 10456237 | St8sia3       | NM_009182    | 0.00019936   | 1.63452 | E11.5 * Wnt1 up vs E11.5 * Ctrl |
| 10355974 | Wdfy1         | NM_001111279 | 3.69328e-006 | 1.63377 | E11.5 * Wnt1 up vs E11.5 * Ctrl |
| 10365833 | Usp44         | NM_183199    | 0.0001437    | 1.63371 | E11.5 * Wnt1 up vs E11.5 * Ctrl |
| 10491780 | Hspa4l        | NM_011020    | 0.000184804  | 1.63339 | E11.5 * Wnt1 up vs E11.5 * Ctrl |
| 10365482 | Timp3         | NM_011595    | 0.000451328  | 1.63316 | E11.5 * Wnt1 up vs E11.5 * Ctrl |
| 10604633 | Cxx1b         | NM_001018063 | 1.76652e-008 | 1.63293 | E11.5 * Wnt1 up vs E11.5 * Ctrl |
| 10358579 | Hmcn1         | NM_001024720 | 0.000107488  | 1.63268 | E11.5 * Wnt1 up vs E11.5 * Ctrl |
| 10505008 | Slc44a1       | NM_133891    | 3.0794e-008  | 1.63148 | E11.5 * Wnt1 up vs E11.5 * Ctrl |
| 10388465 | Doc2b         | NM_007873    | 1.49349e-005 | 1.63148 | E11.5 * Wnt1 up vs E11.5 * Ctrl |
| 10579335 | Pgpep1        | NM_023217    | 8.52778e-007 | 1.63065 | E11.5 * Wnt1 up vs E11.5 * Ctrl |
| 10478962 | 2010011120Rik | NM_025912    | 0.000552071  | 1.63023 | E11.5 * Wnt1 up vs E11.5 * Ctrl |
| 10485309 | E530001K10Rik | ENSMUST00000 | 0.00855979   | 1.62992 | E11.5 * Wnt1 up vs E11.5 * Ctrl |
| 10582275 | Slc7a5        | NM_011404    | 0.0017092    | 1.62965 | E11.5 * Wnt1 up vs E11.5 * Ctrl |
| 10600836 | Msn           | NM_010833    | 1.7234e-008  | 1.6295  | E11.5 * Wnt1 up vs E11.5 * Ctrl |
| 10362394 | Hddc2         | NM_027168    | 9.66331e-005 | 1.62901 | E11.5 * Wnt1 up vs E11.5 * Ctrl |
| 10375880 | Nhp2          | NM_026631    | 4.32007e-005 | 1.62895 | E11.5 * Wnt1 up vs E11.5 * Ctrl |

|          |               |               |              |         |                                 |
|----------|---------------|---------------|--------------|---------|---------------------------------|
| 10569429 | Cdkn1c        | NM_009876     | 2.50243e-009 | 1.6288  | E11.5 * Wnt1 up vs E11.5 * Ctrl |
| 10503643 | Ndufaf4       | NM_026742     | 1.53099e-007 | 1.62852 | E11.5 * Wnt1 up vs E11.5 * Ctrl |
| 10392056 | Cyb561        | NM_007805     | 0.000268487  | 1.62826 | E11.5 * Wnt1 up vs E11.5 * Ctrl |
| 10358581 | Hmcn1         | NM_001024720  | 0.000281245  | 1.62779 | E11.5 * Wnt1 up vs E11.5 * Ctrl |
| 10358539 | Hmcn1         | NM_001024720  | 0.00135082   | 1.62557 | E11.5 * Wnt1 up vs E11.5 * Ctrl |
| 10358611 | Hmcn1         | NM_001024720  | 6.82954e-005 | 1.62317 | E11.5 * Wnt1 up vs E11.5 * Ctrl |
| 10594001 | Arid3b        | NM_019689     | 9.60543e-007 | 1.6223  | E11.5 * Wnt1 up vs E11.5 * Ctrl |
| 10577315 | Angpt2        | NM_007426     | 2.53794e-006 | 1.62201 | E11.5 * Wnt1 up vs E11.5 * Ctrl |
| 10536483 | Tes           | NM_207176     | 1.88169e-011 | 1.62199 | E11.5 * Wnt1 up vs E11.5 * Ctrl |
| 10494595 | Notch2        | NM_010928     | 1.59858e-005 | 1.62194 | E11.5 * Wnt1 up vs E11.5 * Ctrl |
| 10456522 | Tcf4          | NM_013685     | 4.67645e-009 | 1.62184 | E11.5 * Wnt1 up vs E11.5 * Ctrl |
| 10594048 | Islr2         | NM_177193     | 0.000122374  | 1.62084 | E11.5 * Wnt1 up vs E11.5 * Ctrl |
| 10380341 | Spag9         | NM_027569     | 3.48418e-008 | 1.62036 | E11.5 * Wnt1 up vs E11.5 * Ctrl |
| 10373680 | Neurod4       | NM_007501     | 0.00192516   | 1.61977 | E11.5 * Wnt1 up vs E11.5 * Ctrl |
| 10464583 | Gstp1         | NM_013541     | 2.93781e-005 | 1.61955 | E11.5 * Wnt1 up vs E11.5 * Ctrl |
| 10535449 | E130309D02Rik | NM_172726     | 4.06749e-005 | 1.61759 | E11.5 * Wnt1 up vs E11.5 * Ctrl |
| 10435271 | Heg1          | NM_175256     | 3.268e-007   | 1.61746 | E11.5 * Wnt1 up vs E11.5 * Ctrl |
| 10404763 | Tmem170b      | XM_886379     | 7.83102e-006 | 1.61614 | E11.5 * Wnt1 up vs E11.5 * Ctrl |
| 10368101 | D10Bwg1379e   | NM_001033258  | 1.42412e-005 | 1.61534 | E11.5 * Wnt1 up vs E11.5 * Ctrl |
| 10379795 | Ap1gbp1       | NM_001115009  | 1.74169e-006 | 1.61497 | E11.5 * Wnt1 up vs E11.5 * Ctrl |
| 10415784 | Trim13        | NM_023233     | 0.00451344   | 1.61455 | E11.5 * Wnt1 up vs E11.5 * Ctrl |
| 10532857 | Gltf          | NM_019821     | 1.1199e-005  | 1.6129  | E11.5 * Wnt1 up vs E11.5 * Ctrl |
| 10424781 | Grina         | NM_023168     | 2.60815e-005 | 1.61247 | E11.5 * Wnt1 up vs E11.5 * Ctrl |
| 10558481 | Dpysl4        | NM_011993     | 5.04805e-005 | 1.61242 | E11.5 * Wnt1 up vs E11.5 * Ctrl |
| 10596148 | Trf           | NM_133977     | 1.09267e-005 | 1.61146 | E11.5 * Wnt1 up vs E11.5 * Ctrl |
| 10358603 | Hmcn1         | NM_001024720  | 0.000147309  | 1.61135 | E11.5 * Wnt1 up vs E11.5 * Ctrl |
| 10600210 | Slc6a8        | NM_133987     | 3.04947e-005 | 1.61099 | E11.5 * Wnt1 up vs E11.5 * Ctrl |
| 10462035 | Ldhd          | NM_008492     | 2.86656e-007 | 1.61038 | E11.5 * Wnt1 up vs E11.5 * Ctrl |
| 10358565 | Hmcn1         | NM_001024720  | 0.000667735  | 1.61012 | E11.5 * Wnt1 up vs E11.5 * Ctrl |
| 10494735 | Gdap2         | NM_010269     | 4.83142e-005 | 1.6086  | E11.5 * Wnt1 up vs E11.5 * Ctrl |
| 10483624 | Dlx1as        | NR_002854     | 0.000236524  | 1.60789 | E11.5 * Wnt1 up vs E11.5 * Ctrl |
| 10378870 | Git1          | NM_001004144  | 0.000285867  | 1.60728 | E11.5 * Wnt1 up vs E11.5 * Ctrl |
| 10358654 | Hmcn1         | NM_001024720  | 1.97281e-005 | 1.60681 | E11.5 * Wnt1 up vs E11.5 * Ctrl |
| 10453518 | Nrxn1         | NM_020252     | 0.000651777  | 1.60676 | E11.5 * Wnt1 up vs E11.5 * Ctrl |
| 10488387 | Napb          | NM_019632     | 1.00986e-005 | 1.60642 | E11.5 * Wnt1 up vs E11.5 * Ctrl |
| 10497996 | Ikzf5         | NM_175115     | 6.69004e-006 | 1.60641 | E11.5 * Wnt1 up vs E11.5 * Ctrl |
| 10587107 | Myo5a         | NM_010864     | 5.23933e-009 | 1.6062  | E11.5 * Wnt1 up vs E11.5 * Ctrl |
| 10467139 | Lipa          | NM_021460     | 1.7559e-006  | 1.60417 | E11.5 * Wnt1 up vs E11.5 * Ctrl |
| 10459329 | 2700046A07Rik | ENSMUST000001 | 0.000351215  | 1.60391 | E11.5 * Wnt1 up vs E11.5 * Ctrl |
| 10499168 | Kirrel        | NM_130867     | 0.000508303  | 1.60243 | E11.5 * Wnt1 up vs E11.5 * Ctrl |
| 10416541 | Enox1         | NM_172813     | 3.22681e-007 | 1.60217 | E11.5 * Wnt1 up vs E11.5 * Ctrl |
| 10451838 | Slc5a7        | NM_022025     | 0.000672206  | 1.60103 | E11.5 * Wnt1 up vs E11.5 * Ctrl |
| 10434758 | St6gal1       | NM_145933     | 4.85229e-007 | 1.60038 | E11.5 * Wnt1 up vs E11.5 * Ctrl |
| 10603316 | 2010204K13Rik | AF038507      | 1.49142e-005 | 1.60012 | E11.5 * Wnt1 up vs E11.5 * Ctrl |
| 10490551 | Nkain4        | NM_021426     | 1.83607e-005 | 1.59951 | E11.5 * Wnt1 up vs E11.5 * Ctrl |
| 10361807 | Hivep2        | NM_010437     | 0.00040939   | 1.59787 | E11.5 * Wnt1 up vs E11.5 * Ctrl |
| 10551065 | D930028M14Rik | ENSMUST000001 | 2.7742e-005  | 1.5974  | E11.5 * Wnt1 up vs E11.5 * Ctrl |
| 10500304 | Vps45         | NM_013841     | 0.00666198   | 1.59675 | E11.5 * Wnt1 up vs E11.5 * Ctrl |
| 10575685 | Nudt7         | NM_024437     | 0.00182043   | 1.59523 | E11.5 * Wnt1 up vs E11.5 * Ctrl |
| 10549842 | Zfp667        | NM_001024928  | 6.88248e-005 | 1.59468 | E11.5 * Wnt1 up vs E11.5 * Ctrl |
| 10564262 | Mkrn3         | NM_011746     | 0.00142595   | 1.59329 | E11.5 * Wnt1 up vs E11.5 * Ctrl |
| 10358571 | Hmcn1         | NM_001024720  | 0.000199286  | 1.59318 | E11.5 * Wnt1 up vs E11.5 * Ctrl |
| 10358583 | Hmcn1         | NM_001024720  | 0.000128507  | 1.59264 | E11.5 * Wnt1 up vs E11.5 * Ctrl |
| 10358559 | Hmcn1         | NM_001024720  | 8.02128e-006 | 1.59086 | E11.5 * Wnt1 up vs E11.5 * Ctrl |
| 10538290 | Snx10         | NM_028035     | 1.18798e-005 | 1.58926 | E11.5 * Wnt1 up vs E11.5 * Ctrl |
| 10479948 | Cugbp2        | NM_001110228  | 0.002377     | 1.58851 | E11.5 * Wnt1 up vs E11.5 * Ctrl |
| 10403413 | Idi1          | NM_145360     | 0.00803013   | 1.58765 | E11.5 * Wnt1 up vs E11.5 * Ctrl |
| 10495343 | Wdr47         | NM_181400     | 0.000487007  | 1.5876  | E11.5 * Wnt1 up vs E11.5 * Ctrl |
| 10430389 | Mfng          | NM_008595     | 1.34843e-005 | 1.58643 | E11.5 * Wnt1 up vs E11.5 * Ctrl |
| 10359624 | Prrx1         | NM_175686     | 0.00471733   | 1.58504 | E11.5 * Wnt1 up vs E11.5 * Ctrl |
| 10378833 | Ssh2          | NM_177710     | 3.55997e-006 | 1.5844  | E11.5 * Wnt1 up vs E11.5 * Ctrl |
| 10581266 | Tppp3         | NM_026481     | 2.66719e-005 | 1.58368 | E11.5 * Wnt1 up vs E11.5 * Ctrl |
| 10391513 | Dusp3         | NM_028207     | 0.00121079   | 1.58352 | E11.5 * Wnt1 up vs E11.5 * Ctrl |
| 10569129 | Sct           | NM_011328     | 0.000127036  | 1.58342 | E11.5 * Wnt1 up vs E11.5 * Ctrl |
| 10512308 | Sigmar1       | NM_011014     | 0.000166383  | 1.58303 | E11.5 * Wnt1 up vs E11.5 * Ctrl |
| 10561335 | Prkcz         | NM_008860     | 0.00229943   | 1.58219 | E11.5 * Wnt1 up vs E11.5 * Ctrl |

|          |               |               |              |         |                                 |
|----------|---------------|---------------|--------------|---------|---------------------------------|
| 10520650 | Cad           | NM_023525     | 4.82694e-005 | 1.58151 | E11.5 * Wnt1 up vs E11.5 * Ctrl |
| 10451167 | Tmem63b       | NM_198167     | 5.3187e-005  | 1.58144 | E11.5 * Wnt1 up vs E11.5 * Ctrl |
| 10472289 | Tank          | NM_011529     | 5.12393e-005 | 1.58082 | E11.5 * Wnt1 up vs E11.5 * Ctrl |
| 10535017 | Gal3st4       | NM_001033416  | 4.15112e-006 | 1.58014 | E11.5 * Wnt1 up vs E11.5 * Ctrl |
| 10358591 | Hmcn1         | NM_001024720  | 0.000144931  | 1.57996 | E11.5 * Wnt1 up vs E11.5 * Ctrl |
| 10358615 | Hmcn1         | NM_001024720  | 0.000190152  | 1.57891 | E11.5 * Wnt1 up vs E11.5 * Ctrl |
| 10465395 | Ppp2r5b       | NM_198168     | 0.0049272    | 1.57887 | E11.5 * Wnt1 up vs E11.5 * Ctrl |
| 10469322 | Vim           | NM_011701     | 3.2627e-009  | 1.57865 | E11.5 * Wnt1 up vs E11.5 * Ctrl |
| 10527148 | Slc29a4       | NM_146257     | 9.25388e-007 | 1.57836 | E11.5 * Wnt1 up vs E11.5 * Ctrl |
| 10455238 | Ndfip1        | NM_022996     | 2.88995e-008 | 1.5779  | E11.5 * Wnt1 up vs E11.5 * Ctrl |
| 10382341 | Sstr2         | NM_009217     | 0.00381862   | 1.5775  | E11.5 * Wnt1 up vs E11.5 * Ctrl |
| 10397450 | Vash1         | NM_177354     | 2.73778e-005 | 1.57706 | E11.5 * Wnt1 up vs E11.5 * Ctrl |
| 10470027 | Npdc1         | NM_008721     | 7.42e-005    | 1.57636 | E11.5 * Wnt1 up vs E11.5 * Ctrl |
| 10395394 | 4930579E17Rik | NM_178629     | 0.000381131  | 1.57571 | E11.5 * Wnt1 up vs E11.5 * Ctrl |
| 10501358 | Sars          | NM_011319     | 3.18165e-007 | 1.5751  | E11.5 * Wnt1 up vs E11.5 * Ctrl |
| 10398936 | Pacs2         | NM_001081170  | 8.23192e-005 | 1.57489 | E11.5 * Wnt1 up vs E11.5 * Ctrl |
| 10482762 | Idi1          | NM_145360     | 0.00332698   | 1.57451 | E11.5 * Wnt1 up vs E11.5 * Ctrl |
| 10507273 | Pik3r3        | NM_181585     | 1.42562e-008 | 1.57409 | E11.5 * Wnt1 up vs E11.5 * Ctrl |
| 10412066 | Rab3c         | NM_023852     | 0.000315747  | 1.57215 | E11.5 * Wnt1 up vs E11.5 * Ctrl |
| 10355916 | Pax3          | NM_008781     | 1.24237e-006 | 1.57191 | E11.5 * Wnt1 up vs E11.5 * Ctrl |
| 10345715 | Map4k4        | NM_008696     | 6.38438e-007 | 1.57172 | E11.5 * Wnt1 up vs E11.5 * Ctrl |
| 10435752 | Lsamp         | NM_175548     | 2.7809e-006  | 1.57157 | E11.5 * Wnt1 up vs E11.5 * Ctrl |
| 10389719 | Scpep1        | NM_029023     | 8.60865e-007 | 1.57097 | E11.5 * Wnt1 up vs E11.5 * Ctrl |
| 10595836 | E030011O05Rik | ENSMUST000004 | 4.98073e-005 | 1.57096 | E11.5 * Wnt1 up vs E11.5 * Ctrl |
| 10368227 | Ube2q2        | NM_180600     | 1.01748e-005 | 1.57081 | E11.5 * Wnt1 up vs E11.5 * Ctrl |
| 10427877 | ENSMUSG00000C | AK157781      | 0.00042565   | 1.57067 | E11.5 * Wnt1 up vs E11.5 * Ctrl |
| 10371092 | Atcay         | NM_178662     | 0.000872668  | 1.57064 | E11.5 * Wnt1 up vs E11.5 * Ctrl |
| 10385361 | Ublcp1        | NM_024475     | 0.00573268   | 1.56987 | E11.5 * Wnt1 up vs E11.5 * Ctrl |
| 10570180 | EG434280      | ENSMUST000002 | 2.28475e-005 | 1.56939 | E11.5 * Wnt1 up vs E11.5 * Ctrl |
| 10412076 | Gemin8        | NM_146238     | 5.99224e-005 | 1.5693  | E11.5 * Wnt1 up vs E11.5 * Ctrl |
| 10358523 | Hmcn1         | NM_001024720  | 9.74542e-005 | 1.56864 | E11.5 * Wnt1 up vs E11.5 * Ctrl |
| 10492590 | Ppm1l         | NM_178726     | 8.60953e-005 | 1.56839 | E11.5 * Wnt1 up vs E11.5 * Ctrl |
| 10493519 | Shc1          | NM_001113331  | 0.00426676   | 1.56754 | E11.5 * Wnt1 up vs E11.5 * Ctrl |
| 10467730 | Morn4         | NM_198108     | 0.00558337   | 1.56748 | E11.5 * Wnt1 up vs E11.5 * Ctrl |
| 10568529 | Ikzf5         | NM_175115     | 0.00115156   | 1.56737 | E11.5 * Wnt1 up vs E11.5 * Ctrl |
| 10396740 | Gphn          | NM_172952     | 1.33096e-005 | 1.56641 | E11.5 * Wnt1 up vs E11.5 * Ctrl |
| 10450212 | Egfl8         | NM_152922     | 3.8407e-007  | 1.5662  | E11.5 * Wnt1 up vs E11.5 * Ctrl |
| 10468200 | Cuedc2        | NM_024192     | 1.00967e-006 | 1.56535 | E11.5 * Wnt1 up vs E11.5 * Ctrl |
| 10425293 | Cby1          | NM_028634     | 5.81413e-007 | 1.565   | E11.5 * Wnt1 up vs E11.5 * Ctrl |
| 10487748 | 4930402H24Rik | BC052447      | 4.86376e-007 | 1.56314 | E11.5 * Wnt1 up vs E11.5 * Ctrl |
| 10464586 | Gstp2         | NM_181796     | 1.08894e-005 | 1.56314 | E11.5 * Wnt1 up vs E11.5 * Ctrl |
| 10358585 | Hmcn1         | NM_001024720  | 0.00018964   | 1.5613  | E11.5 * Wnt1 up vs E11.5 * Ctrl |
| 10585494 | Ube2q2        | NM_180600     | 4.34176e-006 | 1.56127 | E11.5 * Wnt1 up vs E11.5 * Ctrl |
| 10393970 | Fasn          | NM_007988     | 0.00221314   | 1.5612  | E11.5 * Wnt1 up vs E11.5 * Ctrl |
| 10448034 | Dll1          | NM_007865     | 4.54152e-005 | 1.55928 | E11.5 * Wnt1 up vs E11.5 * Ctrl |
| 10541862 | Iifo1         | NM_178787     | 0.000338973  | 1.55905 | E11.5 * Wnt1 up vs E11.5 * Ctrl |
| 10495625 | Dpyd          | NM_170778     | 0.000230758  | 1.55903 | E11.5 * Wnt1 up vs E11.5 * Ctrl |
| 10578222 | Dlc1          | NM_015802     | 3.04116e-005 | 1.55885 | E11.5 * Wnt1 up vs E11.5 * Ctrl |
| 10385236 | Akr1b3        | NM_009658     | 3.20206e-007 | 1.55839 | E11.5 * Wnt1 up vs E11.5 * Ctrl |
| 10451580 | Bysl          | NM_016859     | 1.38787e-005 | 1.55818 | E11.5 * Wnt1 up vs E11.5 * Ctrl |
| 10400006 | Ahr           | NM_013464     | 5.34878e-006 | 1.55795 | E11.5 * Wnt1 up vs E11.5 * Ctrl |
| 10359235 | Rasal2        | NM_177644     | 4.66893e-008 | 1.5578  | E11.5 * Wnt1 up vs E11.5 * Ctrl |
| 10388884 | Nlk           | NM_008702     | 3.28619e-007 | 1.55677 | E11.5 * Wnt1 up vs E11.5 * Ctrl |
| 10543466 | Gpr37         | NM_010338     | 0.00122698   | 1.55669 | E11.5 * Wnt1 up vs E11.5 * Ctrl |
| 10345350 | ---           | ---           | 1.2229e-005  | 1.55589 | E11.5 * Wnt1 up vs E11.5 * Ctrl |
| 10499108 | Glt28d2       | NM_177130     | 0.000168134  | 1.55583 | E11.5 * Wnt1 up vs E11.5 * Ctrl |
| 10467425 | Sorbs1        | NM_178362     | 1.93667e-006 | 1.55506 | E11.5 * Wnt1 up vs E11.5 * Ctrl |
| 10358573 | Hmcn1         | NM_001024720  | 0.000313059  | 1.55373 | E11.5 * Wnt1 up vs E11.5 * Ctrl |
| 10527229 | 2810453I06Rik | NM_026050     | 2.11859e-005 | 1.55359 | E11.5 * Wnt1 up vs E11.5 * Ctrl |
| 10384985 | Rhbdfl        | NM_010117     | 7.45793e-005 | 1.55286 | E11.5 * Wnt1 up vs E11.5 * Ctrl |
| 10456587 | Mro           | NM_027741     | 3.92406e-005 | 1.55243 | E11.5 * Wnt1 up vs E11.5 * Ctrl |
| 10523058 | Elf5a         | NM_181582     | 0.000184402  | 1.55215 | E11.5 * Wnt1 up vs E11.5 * Ctrl |
| 10559146 | Brsk2         | NM_029426     | 3.57696e-005 | 1.55139 | E11.5 * Wnt1 up vs E11.5 * Ctrl |
| 10593966 | Csk           | NM_007783     | 0.00170471   | 1.551   | E11.5 * Wnt1 up vs E11.5 * Ctrl |
| 10350951 | Tnr           | NM_022312     | 0.000195048  | 1.55052 | E11.5 * Wnt1 up vs E11.5 * Ctrl |
| 10565910 | Plekhhb1      | NM_013746     | 0.000548765  | 1.55051 | E11.5 * Wnt1 up vs E11.5 * Ctrl |

|                        |              |              |         |                                 |
|------------------------|--------------|--------------|---------|---------------------------------|
| 10348653 Gpc1          | NM_016696    | 5.81351e-005 | 1.55018 | E11.5 * Wnt1 up vs E11.5 * Ctrl |
| 10589130 Celsr3        | NM_080437    | 5.67648e-005 | 1.54868 | E11.5 * Wnt1 up vs E11.5 * Ctrl |
| 10511725 Cyb5r4        | NM_024195    | 6.51313e-006 | 1.54856 | E11.5 * Wnt1 up vs E11.5 * Ctrl |
| 10358664 Hmcn1         | NM_001024720 | 1.54957e-005 | 1.54819 | E11.5 * Wnt1 up vs E11.5 * Ctrl |
| 10352815 Irf6          | NM_016851    | 8.58164e-005 | 1.54663 | E11.5 * Wnt1 up vs E11.5 * Ctrl |
| 10358545 Hmcn1         | NM_001024720 | 0.00202455   | 1.54595 | E11.5 * Wnt1 up vs E11.5 * Ctrl |
| 10373388 Obfc2b        | NM_027257    | 0.000221621  | 1.54594 | E11.5 * Wnt1 up vs E11.5 * Ctrl |
| 10360479 Cep170        | NM_001099637 | 6.64897e-007 | 1.54546 | E11.5 * Wnt1 up vs E11.5 * Ctrl |
| 10372891 Srgap1        | NM_001081037 | 6.2045e-006  | 1.54495 | E11.5 * Wnt1 up vs E11.5 * Ctrl |
| 10361152 Gstp2         | NM_181796    | 8.87335e-006 | 1.54364 | E11.5 * Wnt1 up vs E11.5 * Ctrl |
| 10423293 Myo10         | NM_019472    | 5.7075e-005  | 1.54286 | E11.5 * Wnt1 up vs E11.5 * Ctrl |
| 10418198 D14Ertd449e   | NM_025311    | 0.000111287  | 1.5412  | E11.5 * Wnt1 up vs E11.5 * Ctrl |
| 10358563 Hmcn1         | NM_001024720 | 9.70318e-005 | 1.5411  | E11.5 * Wnt1 up vs E11.5 * Ctrl |
| 10588037 Rbp1          | NM_011254    | 1.23934e-006 | 1.541   | E11.5 * Wnt1 up vs E11.5 * Ctrl |
| 10431154 Phf21b        | NM_001081166 | 2.91042e-005 | 1.54054 | E11.5 * Wnt1 up vs E11.5 * Ctrl |
| 10472436 B3galt1       | NM_020283    | 0.000138119  | 1.5398  | E11.5 * Wnt1 up vs E11.5 * Ctrl |
| 10509838 Padi2         | NM_008812    | 0.00177784   | 1.53916 | E11.5 * Wnt1 up vs E11.5 * Ctrl |
| 10426835 Dip2b         | NM_001159361 | 1.53006e-006 | 1.53913 | E11.5 * Wnt1 up vs E11.5 * Ctrl |
| 10497673 Zmat3         | NM_009517    | 0.000214954  | 1.53864 | E11.5 * Wnt1 up vs E11.5 * Ctrl |
| 10418185 D14Ertd449e   | NM_025311    | 0.000156131  | 1.53746 | E11.5 * Wnt1 up vs E11.5 * Ctrl |
| 10604961 Gabra3        | NM_008067    | 7.87011e-005 | 1.53741 | E11.5 * Wnt1 up vs E11.5 * Ctrl |
| 10504692 Tmod1         | NM_021883    | 0.00025692   | 1.53726 | E11.5 * Wnt1 up vs E11.5 * Ctrl |
| 10469936 Nrarp         | NM_025980    | 4.30128e-006 | 1.53716 | E11.5 * Wnt1 up vs E11.5 * Ctrl |
| 10593225 Zbtb16        | NM_001033324 | 0.000102263  | 1.53688 | E11.5 * Wnt1 up vs E11.5 * Ctrl |
| 10347970 Cab39         | NM_133781    | 1.5701e-007  | 1.53687 | E11.5 * Wnt1 up vs E11.5 * Ctrl |
| 10495659 Cnn3          | NM_028044    | 3.39004e-008 | 1.53639 | E11.5 * Wnt1 up vs E11.5 * Ctrl |
| 10373964 Thoc5         | NM_172438    | 3.20655e-005 | 1.53571 | E11.5 * Wnt1 up vs E11.5 * Ctrl |
| 10423503 EG625796      | XM_890363    | 0.00482374   | 1.53543 | E11.5 * Wnt1 up vs E11.5 * Ctrl |
| 10603000 Rai2          | NM_198409    | 0.00406482   | 1.53536 | E11.5 * Wnt1 up vs E11.5 * Ctrl |
| 10371319 ENSMUSG00000  | ENSMUST00000 | 0.00264278   | 1.53393 | E11.5 * Wnt1 up vs E11.5 * Ctrl |
| 10423471 Ctnnd2        | NM_008729    | 5.14283e-005 | 1.53367 | E11.5 * Wnt1 up vs E11.5 * Ctrl |
| 10463138 Dppa2         | NM_028615    | 0.000444769  | 1.53314 | E11.5 * Wnt1 up vs E11.5 * Ctrl |
| 10538082 Atp6v0e2      | NM_133764    | 7.42122e-005 | 1.53235 | E11.5 * Wnt1 up vs E11.5 * Ctrl |
| 10499643 Chrn2         | NM_009602    | 0.000121634  | 1.53172 | E11.5 * Wnt1 up vs E11.5 * Ctrl |
| 10420787 Mtmr9         | NM_177594    | 2.59132e-005 | 1.53109 | E11.5 * Wnt1 up vs E11.5 * Ctrl |
| 10398996 Crip2         | NM_024223    | 0.00188176   | 1.5308  | E11.5 * Wnt1 up vs E11.5 * Ctrl |
| 10405211 Gadd45g       | NM_011817    | 0.00156158   | 1.53075 | E11.5 * Wnt1 up vs E11.5 * Ctrl |
| 10528143 Ppp1r14b      | NM_008889    | 6.11375e-008 | 1.53074 | E11.5 * Wnt1 up vs E11.5 * Ctrl |
| 10573128 Tbc1d9        | NM_001111304 | 4.86463e-009 | 1.53026 | E11.5 * Wnt1 up vs E11.5 * Ctrl |
| 10534456 Hip1          | NM_146001    | 8.38788e-005 | 1.52974 | E11.5 * Wnt1 up vs E11.5 * Ctrl |
| 10362829 Ostn1         | NM_172416    | 4.83045e-005 | 1.52905 | E11.5 * Wnt1 up vs E11.5 * Ctrl |
| 10550400 Pnmal2        | NM_001099636 | 0.00011896   | 1.52892 | E11.5 * Wnt1 up vs E11.5 * Ctrl |
| 10524941 Fbxo21        | NM_145564    | 1.5993e-005  | 1.52854 | E11.5 * Wnt1 up vs E11.5 * Ctrl |
| 10468217 Actr1a        | NM_016860    | 0.000104162  | 1.52702 | E11.5 * Wnt1 up vs E11.5 * Ctrl |
| 10358569 Hmcn1         | NM_001024720 | 0.00042008   | 1.52665 | E11.5 * Wnt1 up vs E11.5 * Ctrl |
| 10465521 Plcb3         | NM_008874    | 7.42495e-006 | 1.52608 | E11.5 * Wnt1 up vs E11.5 * Ctrl |
| 10595805 Rasa2         | NM_053268    | 1.51995e-005 | 1.52529 | E11.5 * Wnt1 up vs E11.5 * Ctrl |
| 10506714 Lrp8          | NM_053073    | 4.79959e-005 | 1.52515 | E11.5 * Wnt1 up vs E11.5 * Ctrl |
| 10353117 Slco5a1       | NM_172841    | 4.81245e-005 | 1.5243  | E11.5 * Wnt1 up vs E11.5 * Ctrl |
| 10482059 Ggta1         | NM_010283    | 0.000401517  | 1.52417 | E11.5 * Wnt1 up vs E11.5 * Ctrl |
| 10490838 Fabbp5        | NM_010634    | 1.75014e-006 | 1.52411 | E11.5 * Wnt1 up vs E11.5 * Ctrl |
| 10451665 Apobec2       | NM_009694    | 0.000751664  | 1.5241  | E11.5 * Wnt1 up vs E11.5 * Ctrl |
| 10579872 Tpd52         | NM_001025263 | 0.000234025  | 1.52405 | E11.5 * Wnt1 up vs E11.5 * Ctrl |
| 10605465 Prkx          | NM_016979    | 0.00129611   | 1.5239  | E11.5 * Wnt1 up vs E11.5 * Ctrl |
| 10450622 2610110G12Rik | NM_001142744 | 0.00150366   | 1.52306 | E11.5 * Wnt1 up vs E11.5 * Ctrl |
| 10386636 Usp22         | NM_001004143 | 2.86884e-007 | 1.52222 | E11.5 * Wnt1 up vs E11.5 * Ctrl |
| 10391454 Vat1          | NM_012037    | 0.000525438  | 1.52205 | E11.5 * Wnt1 up vs E11.5 * Ctrl |
| 10604637 Cxx1b         | NM_001018063 | 1.0906e-007  | 1.52201 | E11.5 * Wnt1 up vs E11.5 * Ctrl |
| 10489660 Elmo2         | NM_207706    | 0.000218298  | 1.52174 | E11.5 * Wnt1 up vs E11.5 * Ctrl |
| 10593245 Htr3b         | NM_020274    | 0.0011948    | 1.52125 | E11.5 * Wnt1 up vs E11.5 * Ctrl |
| 10472162 Gpd2          | NM_010274    | 3.71355e-005 | 1.52099 | E11.5 * Wnt1 up vs E11.5 * Ctrl |
| 10359851 Uck2          | NM_030724    | 2.80489e-005 | 1.52091 | E11.5 * Wnt1 up vs E11.5 * Ctrl |
| 10346250 Mstn          | NM_010834    | 8.11868e-006 | 1.52044 | E11.5 * Wnt1 up vs E11.5 * Ctrl |
| 10444420 Agpat1        | NM_018862    | 0.000114579  | 1.52003 | E11.5 * Wnt1 up vs E11.5 * Ctrl |
| 10354141 Lonrf2        | NM_001029878 | 0.00360828   | 1.51978 | E11.5 * Wnt1 up vs E11.5 * Ctrl |
| 10550316 Tmem160       | NM_026938    | 7.41702e-006 | 1.51944 | E11.5 * Wnt1 up vs E11.5 * Ctrl |

|          |               |              |              |         |                                 |
|----------|---------------|--------------|--------------|---------|---------------------------------|
| 10389391 | OTTMUSG00000  | ENSMUST00000 | 0.00121051   | 1.51923 | E11.5 * Wnt1 up vs E11.5 * Ctrl |
| 10451054 | Enpp4         | NM_199016    | 0.000235533  | 1.51864 | E11.5 * Wnt1 up vs E11.5 * Ctrl |
| 10581547 | Nob1          | NM_026277    | 4.42084e-005 | 1.51804 | E11.5 * Wnt1 up vs E11.5 * Ctrl |
| 10457733 | B4galt6       | NM_019737    | 1.36405e-005 | 1.51801 | E11.5 * Wnt1 up vs E11.5 * Ctrl |
| 10418210 | D14Ertd449e   | NM_025311    | 0.000146933  | 1.51801 | E11.5 * Wnt1 up vs E11.5 * Ctrl |
| 10444098 | Wdr46         | NM_020603    | 5.82938e-005 | 1.51759 | E11.5 * Wnt1 up vs E11.5 * Ctrl |
| 10518428 | Cicn6         | NM_011929    | 0.00131903   | 1.51709 | E11.5 * Wnt1 up vs E11.5 * Ctrl |
| 10573115 | Rnf150        | NM_177378    | 2.7304e-005  | 1.51694 | E11.5 * Wnt1 up vs E11.5 * Ctrl |
| 10543249 | EG232599      | ENSMUST00000 | 0.00434201   | 1.51676 | E11.5 * Wnt1 up vs E11.5 * Ctrl |
| 10600390 | Gdi1          | NM_010273    | 1.35881e-005 | 1.51599 | E11.5 * Wnt1 up vs E11.5 * Ctrl |
| 10377215 | Gas7          | NM_008088    | 1.26237e-006 | 1.51542 | E11.5 * Wnt1 up vs E11.5 * Ctrl |
| 10587315 | Gsta4         | NM_010357    | 2.58416e-005 | 1.51534 | E11.5 * Wnt1 up vs E11.5 * Ctrl |
| 10581493 | Pdpx          | NM_020271    | 0.000314586  | 1.51533 | E11.5 * Wnt1 up vs E11.5 * Ctrl |
| 10538519 | Gsbs          | NM_011153    | 0.00100102   | 1.51432 | E11.5 * Wnt1 up vs E11.5 * Ctrl |
| 10388869 | Tnfaip1       | NM_009395    | 0.000128782  | 1.51426 | E11.5 * Wnt1 up vs E11.5 * Ctrl |
| 10526977 | Eif3b         | NM_133916    | 0.000114097  | 1.51324 | E11.5 * Wnt1 up vs E11.5 * Ctrl |
| 10570437 | Fbxo25        | NM_025785    | 4.74707e-005 | 1.51101 | E11.5 * Wnt1 up vs E11.5 * Ctrl |
| 10585905 | Parp6         | NM_029922    | 4.51962e-006 | 1.51061 | E11.5 * Wnt1 up vs E11.5 * Ctrl |
| 10442224 | BC049807      | BC076634     | 0.000534839  | 1.51061 | E11.5 * Wnt1 up vs E11.5 * Ctrl |
| 10570000 | Gpi1          | NM_008155    | 0.00145097   | 1.51049 | E11.5 * Wnt1 up vs E11.5 * Ctrl |
| 10508907 | Lin28         | NM_145833    | 0.00617022   | 1.51047 | E11.5 * Wnt1 up vs E11.5 * Ctrl |
| 10376021 | 08-Sep        | NM_033144    | 2.48558e-005 | 1.50968 | E11.5 * Wnt1 up vs E11.5 * Ctrl |
| 10367122 | Baz2a         | NM_054078    | 3.16845e-008 | 1.50951 | E11.5 * Wnt1 up vs E11.5 * Ctrl |
| 10358662 | Hmcn1         | NM_001024720 | 7.40849e-005 | 1.50841 | E11.5 * Wnt1 up vs E11.5 * Ctrl |
| 10476355 | Chgb          | NM_007694    | 0.00302499   | 1.506   | E11.5 * Wnt1 up vs E11.5 * Ctrl |
| 10497321 | Pgam1         | NM_023418    | 6.6659e-006  | 1.50573 | E11.5 * Wnt1 up vs E11.5 * Ctrl |
| 10571907 | Mfap3l        | NM_027756    | 9.23468e-005 | 1.50493 | E11.5 * Wnt1 up vs E11.5 * Ctrl |
| 10470834 | Spna2         | NM_001076554 | 6.53307e-006 | 1.50436 | E11.5 * Wnt1 up vs E11.5 * Ctrl |
| 10401181 | Rdh11         | NM_021557    | 2.80063e-005 | 1.50391 | E11.5 * Wnt1 up vs E11.5 * Ctrl |
| 10400395 | Ppp2r3c       | NM_021529    | 0.00199843   | 1.50373 | E11.5 * Wnt1 up vs E11.5 * Ctrl |
| 10358561 | Hmcn1         | NM_001024720 | 0.00102197   | 1.50303 | E11.5 * Wnt1 up vs E11.5 * Ctrl |
| 10390635 | 1810046J19Rik | NM_025559    | 0.00011926   | 1.50271 | E11.5 * Wnt1 up vs E11.5 * Ctrl |
| 10425267 | Pick1         | NM_008837    | 9.22948e-005 | 1.50092 | E11.5 * Wnt1 up vs E11.5 * Ctrl |
| 10358543 | Hmcn1         | NM_001024720 | 0.00199736   | 1.50081 | E11.5 * Wnt1 up vs E11.5 * Ctrl |
| 10379543 | Tmem132e      | NM_023438    | 0.000488685  | 1.49972 | E11.5 * Wnt1 up vs E11.5 * Ctrl |
| 10534531 | Ywhag         | NM_018871    | 0.000482718  | 1.49966 | E11.5 * Wnt1 up vs E11.5 * Ctrl |
| 10464572 | Ndufv1        | NM_133666    | 0.000803123  | 1.49921 | E11.5 * Wnt1 up vs E11.5 * Ctrl |
| 10585214 | Cryab         | NM_009964    | 0.00285648   | 1.49892 | E11.5 * Wnt1 up vs E11.5 * Ctrl |
| 10511881 | Manea         | NM_172865    | 4.65049e-005 | 1.49851 | E11.5 * Wnt1 up vs E11.5 * Ctrl |
| 10509163 | Id3           | NM_008321    | 0.000467048  | 1.49794 | E11.5 * Wnt1 up vs E11.5 * Ctrl |
| 10528484 | Srpk2         | NM_009274    | 2.08493e-006 | 1.49785 | E11.5 * Wnt1 up vs E11.5 * Ctrl |
| 10447354 | Txndc14       | NM_025868    | 7.86096e-005 | 1.49775 | E11.5 * Wnt1 up vs E11.5 * Ctrl |
| 10461022 | Ppp1r14b      | NM_008889    | 1.5414e-008  | 1.49774 | E11.5 * Wnt1 up vs E11.5 * Ctrl |
| 10597883 | Ano10         | NM_133979    | 0.00384432   | 1.49761 | E11.5 * Wnt1 up vs E11.5 * Ctrl |
| 10434934 | Bdh1          | NM_175177    | 0.000326045  | 1.49755 | E11.5 * Wnt1 up vs E11.5 * Ctrl |
| 10596543 | Rad54l2       | NM_030730    | 0.00177059   | 1.49732 | E11.5 * Wnt1 up vs E11.5 * Ctrl |
| 10352554 | ---           | ---          | 0.000703214  | 1.49732 | E11.5 * Wnt1 up vs E11.5 * Ctrl |
| 10418766 | Ankrd28       | NM_001024604 | 6.17298e-005 | 1.49707 | E11.5 * Wnt1 up vs E11.5 * Ctrl |
| 10374068 | Dbnl          | NM_001146308 | 0.00253491   | 1.49637 | E11.5 * Wnt1 up vs E11.5 * Ctrl |
| 10407803 | Gpr137b       | NM_031999    | 0.00445749   | 1.49633 | E11.5 * Wnt1 up vs E11.5 * Ctrl |
| 10376747 | Kcnj12        | NM_010603    | 0.000320927  | 1.49563 | E11.5 * Wnt1 up vs E11.5 * Ctrl |
| 10571214 | Rnf122        | NM_175136    | 0.000502597  | 1.49542 | E11.5 * Wnt1 up vs E11.5 * Ctrl |
| 10533633 | Diablo        | NM_023232    | 8.40067e-007 | 1.49521 | E11.5 * Wnt1 up vs E11.5 * Ctrl |
| 10358658 | Hmcn1         | NM_001024720 | 9.54173e-005 | 1.49498 | E11.5 * Wnt1 up vs E11.5 * Ctrl |
| 10516064 | Mfsd2         | NM_029662    | 0.00188702   | 1.49485 | E11.5 * Wnt1 up vs E11.5 * Ctrl |
| 10412100 | Map3k1        | NM_011945    | 0.00022053   | 1.49482 | E11.5 * Wnt1 up vs E11.5 * Ctrl |
| 10354472 | Gls           | NM_001081081 | 0.00255265   | 1.49407 | E11.5 * Wnt1 up vs E11.5 * Ctrl |
| 10448803 | Hn1l          | NM_198937    | 1.8068e-006  | 1.494   | E11.5 * Wnt1 up vs E11.5 * Ctrl |
| 10434366 | Dvl3          | NM_007889    | 0.00813506   | 1.49294 | E11.5 * Wnt1 up vs E11.5 * Ctrl |
| 10445241 | Tnfrsf21      | NM_178589    | 5.07311e-005 | 1.49223 | E11.5 * Wnt1 up vs E11.5 * Ctrl |
| 10410124 | Ctsl          | NM_009984    | 1.55028e-007 | 1.49208 | E11.5 * Wnt1 up vs E11.5 * Ctrl |
| 10358567 | Hmcn1         | NM_001024720 | 0.000316394  | 1.49196 | E11.5 * Wnt1 up vs E11.5 * Ctrl |
| 10358593 | Hmcn1         | NM_001024720 | 0.000759636  | 1.49171 | E11.5 * Wnt1 up vs E11.5 * Ctrl |
| 10398727 | Klc1          | NM_001025360 | 0.000154562  | 1.49166 | E11.5 * Wnt1 up vs E11.5 * Ctrl |
| 10352119 | Pppde1        | NM_024282    | 4.06792e-006 | 1.49162 | E11.5 * Wnt1 up vs E11.5 * Ctrl |
| 10485151 | Mapk8ip1      | NM_011162    | 0.000222136  | 1.49127 | E11.5 * Wnt1 up vs E11.5 * Ctrl |

|          |               |              |              |         |                                 |
|----------|---------------|--------------|--------------|---------|---------------------------------|
| 10481368 | Trub2         | NM_145520    | 7.09448e-005 | 1.49107 | E11.5 * Wnt1 up vs E11.5 * Ctrl |
| 10558948 | Cd151         | NM_009842    | 0.000991745  | 1.49009 | E11.5 * Wnt1 up vs E11.5 * Ctrl |
| 10445338 | Enpp5         | NM_032003    | 0.000370081  | 1.48948 | E11.5 * Wnt1 up vs E11.5 * Ctrl |
| 10555205 | Gdpd5         | NM_201352    | 0.000469711  | 1.48917 | E11.5 * Wnt1 up vs E11.5 * Ctrl |
| 10509777 | Iifo2         | NM_183148    | 0.000102     | 1.48898 | E11.5 * Wnt1 up vs E11.5 * Ctrl |
| 10598359 | Syp           | NM_009305    | 8.37909e-005 | 1.48849 | E11.5 * Wnt1 up vs E11.5 * Ctrl |
| 10479230 | Phactr3       | NM_028806    | 0.000928587  | 1.48738 | E11.5 * Wnt1 up vs E11.5 * Ctrl |
| 10606174 | Nap1l2        | NM_008671    | 0.00676623   | 1.48643 | E11.5 * Wnt1 up vs E11.5 * Ctrl |
| 10484431 | Txndc14       | NM_025868    | 6.8752e-005  | 1.48641 | E11.5 * Wnt1 up vs E11.5 * Ctrl |
| 10367734 | Ust           | NM_177387    | 0.000216786  | 1.48526 | E11.5 * Wnt1 up vs E11.5 * Ctrl |
| 10530201 | Ugdh          | NM_009466    | 7.341e-005   | 1.48453 | E11.5 * Wnt1 up vs E11.5 * Ctrl |
| 10443383 | Tmhs          | NM_026571    | 0.00308303   | 1.48441 | E11.5 * Wnt1 up vs E11.5 * Ctrl |
| 10488589 | Fam110a       | NM_028666    | 9.30693e-005 | 1.48371 | E11.5 * Wnt1 up vs E11.5 * Ctrl |
| 10594631 | Aph1b         | NM_177583    | 2.15322e-005 | 1.48362 | E11.5 * Wnt1 up vs E11.5 * Ctrl |
| 10348580 | Klhl30        | NM_027551    | 0.000248301  | 1.48262 | E11.5 * Wnt1 up vs E11.5 * Ctrl |
| 10394625 | ---           | ---          | 0.00242491   | 1.48195 | E11.5 * Wnt1 up vs E11.5 * Ctrl |
| 10484894 | Ptprj         | NM_008982    | 0.00047822   | 1.48189 | E11.5 * Wnt1 up vs E11.5 * Ctrl |
| 10460517 | Brms1         | NM_134155    | 0.000740463  | 1.48176 | E11.5 * Wnt1 up vs E11.5 * Ctrl |
| 10363905 | Zwint         | NM_025635    | 1.92437e-007 | 1.4817  | E11.5 * Wnt1 up vs E11.5 * Ctrl |
| 10437590 | Carhsp1       | NM_025821    | 8.34461e-007 | 1.48149 | E11.5 * Wnt1 up vs E11.5 * Ctrl |
| 10480492 | Cacna1b       | NM_001042528 | 1.30018e-006 | 1.48148 | E11.5 * Wnt1 up vs E11.5 * Ctrl |
| 10434348 | Elf2b5        | NM_172265    | 2.72159e-005 | 1.48126 | E11.5 * Wnt1 up vs E11.5 * Ctrl |
| 10581289 | Atp6v0d1      | NM_013477    | 0.000576634  | 1.48091 | E11.5 * Wnt1 up vs E11.5 * Ctrl |
| 10452613 | Arhgap28      | NM_172964    | 1.89842e-006 | 1.48069 | E11.5 * Wnt1 up vs E11.5 * Ctrl |
| 10402585 | Wars          | NM_011710    | 2.1516e-005  | 1.48037 | E11.5 * Wnt1 up vs E11.5 * Ctrl |
| 10409767 | Golm1         | NM_027307    | 0.000226539  | 1.47953 | E11.5 * Wnt1 up vs E11.5 * Ctrl |
| 10521709 | Lap3          | NM_024434    | 1.13401e-005 | 1.47951 | E11.5 * Wnt1 up vs E11.5 * Ctrl |
| 10388898 | 1810009O10Rik | BC027022     | 0.00650419   | 1.47943 | E11.5 * Wnt1 up vs E11.5 * Ctrl |
| 10571567 | Sorbs2        | NM_172752    | 3.02294e-006 | 1.47907 | E11.5 * Wnt1 up vs E11.5 * Ctrl |
| 10524703 | Pxn           | NM_011223    | 6.12144e-005 | 1.4787  | E11.5 * Wnt1 up vs E11.5 * Ctrl |
| 10449971 | Zfp763        | NM_028543    | 0.00425758   | 1.47786 | E11.5 * Wnt1 up vs E11.5 * Ctrl |
| 10390283 | Cdk5rap3      | NM_030248    | 0.000468294  | 1.47773 | E11.5 * Wnt1 up vs E11.5 * Ctrl |
| 10535273 | Gna12         | NM_010302    | 0.00045132   | 1.4777  | E11.5 * Wnt1 up vs E11.5 * Ctrl |
| 10506274 | Dnajc6        | NM_198412    | 1.11248e-005 | 1.47764 | E11.5 * Wnt1 up vs E11.5 * Ctrl |
| 10566730 | Stk33         | ENSMUST00000 | 0.000307675  | 1.47748 | E11.5 * Wnt1 up vs E11.5 * Ctrl |
| 10491300 | Skil          | NM_011386    | 1.89201e-005 | 1.47696 | E11.5 * Wnt1 up vs E11.5 * Ctrl |
| 10551852 | Clip3         | NM_001081114 | 0.00139888   | 1.47666 | E11.5 * Wnt1 up vs E11.5 * Ctrl |
| 10525439 | P2rx4         | NM_011026    | 0.00304149   | 1.47594 | E11.5 * Wnt1 up vs E11.5 * Ctrl |
| 10348087 | Cops7b        | NM_172974    | 0.00219259   | 1.47586 | E11.5 * Wnt1 up vs E11.5 * Ctrl |
| 10474112 | Traf6         | NM_009424    | 3.10289e-005 | 1.47496 | E11.5 * Wnt1 up vs E11.5 * Ctrl |
| 10519770 | Pclo          | NM_011995    | 0.000531173  | 1.47405 | E11.5 * Wnt1 up vs E11.5 * Ctrl |
| 10456836 | St8sia5       | NM_153124    | 0.000119494  | 1.47395 | E11.5 * Wnt1 up vs E11.5 * Ctrl |
| 10594590 | Snx1          | NM_019727    | 4.63084e-006 | 1.47355 | E11.5 * Wnt1 up vs E11.5 * Ctrl |
| 10456501 | Rnmt          | NM_026440    | 2.67604e-005 | 1.47302 | E11.5 * Wnt1 up vs E11.5 * Ctrl |
| 10447502 | Adcyap1       | NM_009625    | 0.00296526   | 1.47294 | E11.5 * Wnt1 up vs E11.5 * Ctrl |
| 10517425 | Lypla2        | NM_011942    | 0.00641824   | 1.47288 | E11.5 * Wnt1 up vs E11.5 * Ctrl |
| 10505911 | Dmrt1         | NM_175647    | 0.00154786   | 1.47254 | E11.5 * Wnt1 up vs E11.5 * Ctrl |
| 10518812 | Camta1        | NM_001081557 | 0.00021661   | 1.47244 | E11.5 * Wnt1 up vs E11.5 * Ctrl |
| 10430113 | D15Wsu169e    | BC060637     | 0.000614502  | 1.47199 | E11.5 * Wnt1 up vs E11.5 * Ctrl |
| 10438585 | Tmem41a       | NM_025693    | 0.00216659   | 1.47132 | E11.5 * Wnt1 up vs E11.5 * Ctrl |
| 10394158 | Kif3c         | NM_008445    | 0.000143349  | 1.47099 | E11.5 * Wnt1 up vs E11.5 * Ctrl |
| 10491962 | Foxo1         | NM_019739    | 8.46949e-006 | 1.4709  | E11.5 * Wnt1 up vs E11.5 * Ctrl |
| 10358589 | Hmcn1         | NM_001024720 | 0.00065084   | 1.4709  | E11.5 * Wnt1 up vs E11.5 * Ctrl |
| 10489694 | Zfp334        | NM_178411    | 0.000231466  | 1.4705  | E11.5 * Wnt1 up vs E11.5 * Ctrl |
| 10356020 | Dock10        | NM_175291    | 0.000865323  | 1.47039 | E11.5 * Wnt1 up vs E11.5 * Ctrl |
| 10429295 | Kcnk9         | NM_001033876 | 0.000123557  | 1.47024 | E11.5 * Wnt1 up vs E11.5 * Ctrl |
| 10373814 | Pes1          | NM_022889    | 0.000343142  | 1.46982 | E11.5 * Wnt1 up vs E11.5 * Ctrl |
| 10541845 | Nop2          | NM_138747    | 0.00441441   | 1.46951 | E11.5 * Wnt1 up vs E11.5 * Ctrl |
| 10400141 | Zbed4         | NM_181412    | 0.00195028   | 1.46875 | E11.5 * Wnt1 up vs E11.5 * Ctrl |
| 10368577 | Rnf217        | NM_001146349 | 0.000310234  | 1.46851 | E11.5 * Wnt1 up vs E11.5 * Ctrl |
| 10367641 | Mthfd1l       | NM_172308    | 2.49033e-007 | 1.4675  | E11.5 * Wnt1 up vs E11.5 * Ctrl |
| 10515613 | Ptprf         | NM_011213    | 0.00365965   | 1.46641 | E11.5 * Wnt1 up vs E11.5 * Ctrl |
| 10555118 | Pak1          | NM_011035    | 1.32471e-005 | 1.46624 | E11.5 * Wnt1 up vs E11.5 * Ctrl |
| 10361642 | Lrp11         | NM_172784    | 0.00376053   | 1.46554 | E11.5 * Wnt1 up vs E11.5 * Ctrl |
| 10565018 | Iqgap1        | NM_016721    | 4.99615e-006 | 1.46446 | E11.5 * Wnt1 up vs E11.5 * Ctrl |
| 10548163 | Tulp3         | NM_011657    | 7.85588e-005 | 1.46372 | E11.5 * Wnt1 up vs E11.5 * Ctrl |

|          |               |               |              |         |                                 |
|----------|---------------|---------------|--------------|---------|---------------------------------|
| 10587085 | BC031353      | NM_001113283  | 2.7673e-005  | 1.46362 | E11.5 * Wnt1 up vs E11.5 * Ctrl |
| 10529549 | Tbc1d14       | NM_001113362  | 1.41551e-005 | 1.46247 | E11.5 * Wnt1 up vs E11.5 * Ctrl |
| 10536353 | Dlx6          | NM_010057     | 0.00181223   | 1.46232 | E11.5 * Wnt1 up vs E11.5 * Ctrl |
| 10409345 | Cltb          | NM_028870     | 0.000716371  | 1.46176 | E11.5 * Wnt1 up vs E11.5 * Ctrl |
| 10467979 | Scd1          | NM_009127     | 0.00310239   | 1.46152 | E11.5 * Wnt1 up vs E11.5 * Ctrl |
| 10401997 | Ptpn21        | NM_011877     | 1.80298e-005 | 1.46142 | E11.5 * Wnt1 up vs E11.5 * Ctrl |
| 10557156 | Plk1          | NM_011121     | 0.000212266  | 1.46132 | E11.5 * Wnt1 up vs E11.5 * Ctrl |
| 10594652 | Lactb         | NM_030717     | 0.00317728   | 1.46063 | E11.5 * Wnt1 up vs E11.5 * Ctrl |
| 10570144 | Arhgef7       | NM_001113518  | 1.03775e-006 | 1.4605  | E11.5 * Wnt1 up vs E11.5 * Ctrl |
| 10583145 | Tmem123       | NM_133739     | 3.47493e-006 | 1.46025 | E11.5 * Wnt1 up vs E11.5 * Ctrl |
| 10567355 | Gprc5b        | NM_022420     | 4.31877e-005 | 1.46008 | E11.5 * Wnt1 up vs E11.5 * Ctrl |
| 10585699 | Fabp5         | NM_010634     | 5.72884e-006 | 1.45987 | E11.5 * Wnt1 up vs E11.5 * Ctrl |
| 10510391 | Srm           | NM_009272     | 0.000118638  | 1.45969 | E11.5 * Wnt1 up vs E11.5 * Ctrl |
| 10497214 | Tpd52         | NM_001025261  | 0.00409595   | 1.45948 | E11.5 * Wnt1 up vs E11.5 * Ctrl |
| 10549097 | Ldhb          | NM_008492     | 2.01773e-007 | 1.45946 | E11.5 * Wnt1 up vs E11.5 * Ctrl |
| 10605797 | Arhgef9       | NM_001033329  | 4.87714e-006 | 1.45904 | E11.5 * Wnt1 up vs E11.5 * Ctrl |
| 10501909 | Mettl14       | NM_201638     | 3.12745e-007 | 1.45859 | E11.5 * Wnt1 up vs E11.5 * Ctrl |
| 10517373 | Rcan3         | NM_022980     | 1.7873e-007  | 1.45835 | E11.5 * Wnt1 up vs E11.5 * Ctrl |
| 10583384 | ---           | ---           | 0.00228106   | 1.4583  | E11.5 * Wnt1 up vs E11.5 * Ctrl |
| 10467749 | Crtac1        | NM_145123     | 3.39656e-006 | 1.45825 | E11.5 * Wnt1 up vs E11.5 * Ctrl |
| 10607587 | Pdha1         | NM_008810     | 4.269e-005   | 1.45825 | E11.5 * Wnt1 up vs E11.5 * Ctrl |
| 10540333 | Cntn6         | NM_017383     | 0.00257454   | 1.45792 | E11.5 * Wnt1 up vs E11.5 * Ctrl |
| 10607004 | Psmd10        | NM_016883     | 0.00015909   | 1.45768 | E11.5 * Wnt1 up vs E11.5 * Ctrl |
| 10446763 | Lbh           | NM_029999     | 9.02323e-007 | 1.45765 | E11.5 * Wnt1 up vs E11.5 * Ctrl |
| 10536216 | Gng11         | NM_025331     | 0.000878501  | 1.45733 | E11.5 * Wnt1 up vs E11.5 * Ctrl |
| 10378088 | Mybbp1a       | NM_016776     | 0.00133271   | 1.4573  | E11.5 * Wnt1 up vs E11.5 * Ctrl |
| 10529957 | Gpr125        | ENSMUST000001 | 1.4062e-005  | 1.45688 | E11.5 * Wnt1 up vs E11.5 * Ctrl |
| 10481291 | Gtf3c5        | NM_148928     | 0.00188926   | 1.45646 | E11.5 * Wnt1 up vs E11.5 * Ctrl |
| 10442914 | O610011F06Rik | NM_026686     | 2.64574e-005 | 1.45598 | E11.5 * Wnt1 up vs E11.5 * Ctrl |
| 10439955 | Fam55c        | NM_001134457  | 0.00114725   | 1.45586 | E11.5 * Wnt1 up vs E11.5 * Ctrl |
| 10524588 | Ankrd13a      | NM_026718     | 0.000186345  | 1.45573 | E11.5 * Wnt1 up vs E11.5 * Ctrl |
| 10375485 | ---           | ---           | 9.6379e-006  | 1.45529 | E11.5 * Wnt1 up vs E11.5 * Ctrl |
| 10452918 | Strn          | NM_011500     | 8.72141e-006 | 1.45523 | E11.5 * Wnt1 up vs E11.5 * Ctrl |
| 10490061 | Bcas1         | NM_029815     | 1.5944e-005  | 1.45519 | E11.5 * Wnt1 up vs E11.5 * Ctrl |
| 10549653 | Atp6v0c       | NM_009729     | 0.00500411   | 1.45453 | E11.5 * Wnt1 up vs E11.5 * Ctrl |
| 10358666 | Hmcn1         | NM_001024720  | 3.80569e-005 | 1.45421 | E11.5 * Wnt1 up vs E11.5 * Ctrl |
| 10576844 | BC068157      | NM_207203     | 0.00021201   | 1.45397 | E11.5 * Wnt1 up vs E11.5 * Ctrl |
| 10376854 | Pigl          | NM_001039536  | 4.81379e-005 | 1.45393 | E11.5 * Wnt1 up vs E11.5 * Ctrl |
| 10501121 | Fam40a        | NM_153563     | 0.000109923  | 1.4537  | E11.5 * Wnt1 up vs E11.5 * Ctrl |
| 10478997 | Tcfap2c       | NM_009335     | 1.17351e-006 | 1.45324 | E11.5 * Wnt1 up vs E11.5 * Ctrl |
| 10473244 | Zfp804a       | NM_175513     | 0.000525774  | 1.45274 | E11.5 * Wnt1 up vs E11.5 * Ctrl |
| 10525542 | Bcl7a         | NM_029850     | 0.000247471  | 1.45254 | E11.5 * Wnt1 up vs E11.5 * Ctrl |
| 10399419 | Tubb2b        | NM_023716     | 0.000474672  | 1.45212 | E11.5 * Wnt1 up vs E11.5 * Ctrl |
| 10510687 | Acot7         | NM_133348     | 0.000134357  | 1.45191 | E11.5 * Wnt1 up vs E11.5 * Ctrl |
| 10504218 | Dnajb5        | NM_019874     | 0.000429281  | 1.45185 | E11.5 * Wnt1 up vs E11.5 * Ctrl |
| 10478924 | ENSMUSG0000C  | ENSMUST000001 | 0.00625851   | 1.45176 | E11.5 * Wnt1 up vs E11.5 * Ctrl |
| 10503966 | Aco1          | NM_007386     | 2.65482e-005 | 1.45165 | E11.5 * Wnt1 up vs E11.5 * Ctrl |
| 10453717 | Fabp5l2       | ENSMUST000001 | 0.0022163    | 1.45154 | E11.5 * Wnt1 up vs E11.5 * Ctrl |
| 10436487 | Vgll3         | AK007165      | 0.00343097   | 1.45123 | E11.5 * Wnt1 up vs E11.5 * Ctrl |
| 10499438 | Msto1         | NM_144898     | 0.0036747    | 1.45092 | E11.5 * Wnt1 up vs E11.5 * Ctrl |
| 10411882 | Nln           | NM_029447     | 5.41322e-005 | 1.45064 | E11.5 * Wnt1 up vs E11.5 * Ctrl |
| 10384398 | Grb10         | NM_010345     | 3.08639e-005 | 1.45041 | E11.5 * Wnt1 up vs E11.5 * Ctrl |
| 10476189 | Mrps26        | NM_207207     | 0.00167789   | 1.45028 | E11.5 * Wnt1 up vs E11.5 * Ctrl |
| 10356833 | Stk25         | NM_021537     | 0.00160673   | 1.44976 | E11.5 * Wnt1 up vs E11.5 * Ctrl |
| 10384452 | Ublcp1        | NM_024475     | 0.00096641   | 1.44937 | E11.5 * Wnt1 up vs E11.5 * Ctrl |
| 10440840 | 1110004E09Rik | BC019533      | 7.74108e-006 | 1.44928 | E11.5 * Wnt1 up vs E11.5 * Ctrl |
| 10566714 | Ric3          | NM_001038624  | 0.00025333   | 1.4482  | E11.5 * Wnt1 up vs E11.5 * Ctrl |
| 10529656 | Nsg1          | NM_010942     | 2.10542e-005 | 1.44789 | E11.5 * Wnt1 up vs E11.5 * Ctrl |
| 10351825 | Tagln2        | NM_178598     | 0.000427889  | 1.44778 | E11.5 * Wnt1 up vs E11.5 * Ctrl |
| 10554094 | Igf1r         | NM_010513     | 0.00056012   | 1.44721 | E11.5 * Wnt1 up vs E11.5 * Ctrl |
| 10366951 | Ndufa4l2      | NM_001098789  | 0.00841381   | 1.44622 | E11.5 * Wnt1 up vs E11.5 * Ctrl |
| 10457536 | Ankrd29       | ENSMUST000001 | 0.00040058   | 1.44579 | E11.5 * Wnt1 up vs E11.5 * Ctrl |
| 10434577 | Vps8          | NM_001081366  | 9.19153e-009 | 1.44558 | E11.5 * Wnt1 up vs E11.5 * Ctrl |
| 10603706 | Med4          | NM_026119     | 0.00385632   | 1.44495 | E11.5 * Wnt1 up vs E11.5 * Ctrl |
| 10448865 | Gnptg         | NM_172529     | 1.22139e-006 | 1.44495 | E11.5 * Wnt1 up vs E11.5 * Ctrl |
| 10457942 | Syt4          | NM_009308     | 0.00231261   | 1.44485 | E11.5 * Wnt1 up vs E11.5 * Ctrl |

|                        |              |              |         |                                 |
|------------------------|--------------|--------------|---------|---------------------------------|
| 10422179 Pou4f1        | NM_011143    | 0.000314658  | 1.44483 | E11.5 * Wnt1 up vs E11.5 * Ctrl |
| 10482772 Nr4a2         | NM_001139509 | 0.00162725   | 1.44471 | E11.5 * Wnt1 up vs E11.5 * Ctrl |
| 10494060 Mrpl9         | NM_030116    | 1.79937e-005 | 1.44419 | E11.5 * Wnt1 up vs E11.5 * Ctrl |
| 10419170 Txndc16       | NM_172597    | 0.00146216   | 1.44396 | E11.5 * Wnt1 up vs E11.5 * Ctrl |
| 10357345 E030049G20Rik | NM_172484    | 0.00303803   | 1.4439  | E11.5 * Wnt1 up vs E11.5 * Ctrl |
| 10507105 OTTMUSG00000  | ENSMUST00000 | 0.00534321   | 1.44381 | E11.5 * Wnt1 up vs E11.5 * Ctrl |
| 10348432 Agap1         | NM_178119    | 0.000827868  | 1.44332 | E11.5 * Wnt1 up vs E11.5 * Ctrl |
| 10386844 Zswim7        | BC109343     | 0.00459535   | 1.44311 | E11.5 * Wnt1 up vs E11.5 * Ctrl |
| 10493309 Rit1          | NM_009069    | 0.00479185   | 1.44283 | E11.5 * Wnt1 up vs E11.5 * Ctrl |
| 10379654 Ap2b1         | NM_001035854 | 3.05236e-007 | 1.44268 | E11.5 * Wnt1 up vs E11.5 * Ctrl |
| 10410959 Atg10         | NM_025770    | 0.00375203   | 1.44261 | E11.5 * Wnt1 up vs E11.5 * Ctrl |
| 10521243 Grk4          | NM_019497    | 0.00520576   | 1.44192 | E11.5 * Wnt1 up vs E11.5 * Ctrl |
| 10476005 A730036I17Rik | ENSMUST00000 | 0.00117815   | 1.44185 | E11.5 * Wnt1 up vs E11.5 * Ctrl |
| 10453887 Cables1       | NM_001146287 | 2.84694e-005 | 1.44161 | E11.5 * Wnt1 up vs E11.5 * Ctrl |
| 10540248 Mitf          | NM_001113198 | 0.00259605   | 1.44141 | E11.5 * Wnt1 up vs E11.5 * Ctrl |
| 10555570 Phox2a        | NM_008887    | 0.00220145   | 1.44124 | E11.5 * Wnt1 up vs E11.5 * Ctrl |
| 10421526 Rb1           | NM_009029    | 0.000293052  | 1.44104 | E11.5 * Wnt1 up vs E11.5 * Ctrl |
| 10557420 Tufm          | NM_172745    | 0.00449779   | 1.44104 | E11.5 * Wnt1 up vs E11.5 * Ctrl |
| 10458183 Gfra3         | NM_010280    | 0.000536529  | 1.44045 | E11.5 * Wnt1 up vs E11.5 * Ctrl |
| 10369630 Ddx21         | NM_019553    | 5.37031e-005 | 1.43982 | E11.5 * Wnt1 up vs E11.5 * Ctrl |
| 10589368 Plxnb1        | NM_172775    | 0.00481016   | 1.43972 | E11.5 * Wnt1 up vs E11.5 * Ctrl |
| 10442396 Abca3         | NM_013855    | 1.07995e-005 | 1.4396  | E11.5 * Wnt1 up vs E11.5 * Ctrl |
| 10566457 Apbb1         | NM_009685    | 0.000331286  | 1.43869 | E11.5 * Wnt1 up vs E11.5 * Ctrl |
| 10450226 Ppt2          | NM_019441    | 0.00729624   | 1.43849 | E11.5 * Wnt1 up vs E11.5 * Ctrl |
| 10593668 Dmxl2         | NM_172771    | 0.00226384   | 1.4383  | E11.5 * Wnt1 up vs E11.5 * Ctrl |
| 10419073 Tspan14       | NM_145928    | 0.000152712  | 1.4383  | E11.5 * Wnt1 up vs E11.5 * Ctrl |
| 10521440 Afap1         | NM_027373    | 3.82336e-005 | 1.43818 | E11.5 * Wnt1 up vs E11.5 * Ctrl |
| 10363575 Dna2          | NM_177372    | 6.27922e-007 | 1.43772 | E11.5 * Wnt1 up vs E11.5 * Ctrl |
| 10457118 Rttm          | NM_175542    | 0.000406568  | 1.4375  | E11.5 * Wnt1 up vs E11.5 * Ctrl |
| 10513061 Ctnnal1       | NM_018761    | 1.96096e-005 | 1.43699 | E11.5 * Wnt1 up vs E11.5 * Ctrl |
| 10542896 Bicd1         | NM_009753    | 0.000411561  | 1.43685 | E11.5 * Wnt1 up vs E11.5 * Ctrl |
| 10500582 Wdr3          | NM_175552    | 0.000109024  | 1.43665 | E11.5 * Wnt1 up vs E11.5 * Ctrl |
| 10528648 Abcf2         | NM_013853    | 2.44528e-005 | 1.43584 | E11.5 * Wnt1 up vs E11.5 * Ctrl |
| 10504518 Polr1e        | NM_022811    | 8.4399e-006  | 1.43554 | E11.5 * Wnt1 up vs E11.5 * Ctrl |
| 10553897 Mtmr10        | NM_172742    | 0.00420393   | 1.43541 | E11.5 * Wnt1 up vs E11.5 * Ctrl |
| 10534575 Prkrip1       | NM_025774    | 1.49956e-005 | 1.4352  | E11.5 * Wnt1 up vs E11.5 * Ctrl |
| 10581577 Dhx38         | NM_178380    | 0.00125446   | 1.43508 | E11.5 * Wnt1 up vs E11.5 * Ctrl |
| 10429027 Eif2c2        | NM_153178    | 0.000557563  | 1.4347  | E11.5 * Wnt1 up vs E11.5 * Ctrl |
| 10400023 Tspan13       | NM_025359    | 4.59571e-005 | 1.43429 | E11.5 * Wnt1 up vs E11.5 * Ctrl |
| 10412909 Fdft1         | NM_010191    | 0.00131345   | 1.43313 | E11.5 * Wnt1 up vs E11.5 * Ctrl |
| 10449920 Zfp811        | NM_183177    | 0.00452178   | 1.43306 | E11.5 * Wnt1 up vs E11.5 * Ctrl |
| 10465638 Nat11         | BC020020     | 0.00593877   | 1.43302 | E11.5 * Wnt1 up vs E11.5 * Ctrl |
| 10494804 Casq2         | NM_009814    | 0.000728783  | 1.43296 | E11.5 * Wnt1 up vs E11.5 * Ctrl |
| 10391103 Jup           | NM_010593    | 0.00322432   | 1.43255 | E11.5 * Wnt1 up vs E11.5 * Ctrl |
| 10545379 Usp39         | NM_138592    | 4.25787e-006 | 1.43226 | E11.5 * Wnt1 up vs E11.5 * Ctrl |
| 10425116 Cdc42ep1      | NM_027219    | 0.00768275   | 1.43215 | E11.5 * Wnt1 up vs E11.5 * Ctrl |
| 10526181 Gatsl2        | NM_030719    | 0.000124849  | 1.43178 | E11.5 * Wnt1 up vs E11.5 * Ctrl |
| 10510482 Clstn1        | NM_023051    | 0.00187247   | 1.43166 | E11.5 * Wnt1 up vs E11.5 * Ctrl |
| 10521467 Ccdc96        | NM_025725    | 0.000781375  | 1.43146 | E11.5 * Wnt1 up vs E11.5 * Ctrl |
| 10518561 Apatd1        | NM_027263    | 0.000975899  | 1.43119 | E11.5 * Wnt1 up vs E11.5 * Ctrl |
| 10593270 Ttc12         | NM_172770    | 1.74229e-005 | 1.43084 | E11.5 * Wnt1 up vs E11.5 * Ctrl |
| 10363901 Etv5          | NM_023794    | 0.000129198  | 1.43083 | E11.5 * Wnt1 up vs E11.5 * Ctrl |
| 10394770 Odc1          | NM_013614    | 2.56136e-006 | 1.43072 | E11.5 * Wnt1 up vs E11.5 * Ctrl |
| 10350113 Arl8a         | NM_026823    | 0.000841416  | 1.43061 | E11.5 * Wnt1 up vs E11.5 * Ctrl |
| 10352242 Parp1         | NM_007415    | 0.00012399   | 1.43041 | E11.5 * Wnt1 up vs E11.5 * Ctrl |
| 10358617 Hmcn1         | NM_001024720 | 0.00354611   | 1.42986 | E11.5 * Wnt1 up vs E11.5 * Ctrl |
| 10535852 Slc7a1        | NM_007513    | 0.000123743  | 1.42986 | E11.5 * Wnt1 up vs E11.5 * Ctrl |
| 10414025 Gdf10         | NM_145741    | 1.31802e-006 | 1.42961 | E11.5 * Wnt1 up vs E11.5 * Ctrl |
| 10430020 Vps28         | NM_025842    | 0.000823252  | 1.42929 | E11.5 * Wnt1 up vs E11.5 * Ctrl |
| 10353915 Fam178b       | NM_027957    | 0.00488665   | 1.42919 | E11.5 * Wnt1 up vs E11.5 * Ctrl |
| 10485582 Tcp11l1       | NM_177190    | 0.000575063  | 1.42918 | E11.5 * Wnt1 up vs E11.5 * Ctrl |
| 10347232 Xrcc5         | NM_009533    | 5.78792e-006 | 1.42915 | E11.5 * Wnt1 up vs E11.5 * Ctrl |
| 10544837 1200009O22Rik | BC043099     | 2.96328e-005 | 1.42911 | E11.5 * Wnt1 up vs E11.5 * Ctrl |
| 10441497 Tulp4         | NM_054040    | 0.00471849   | 1.42879 | E11.5 * Wnt1 up vs E11.5 * Ctrl |
| 10433264 Glis2         | NM_031184    | 7.20773e-005 | 1.42852 | E11.5 * Wnt1 up vs E11.5 * Ctrl |
| 10458767 Trim36        | NM_178872    | 0.00102772   | 1.42839 | E11.5 * Wnt1 up vs E11.5 * Ctrl |

|          |               |              |              |         |                                 |
|----------|---------------|--------------|--------------|---------|---------------------------------|
| 10404380 | Dusp22        | NM_001037955 | 2.07996e-005 | 1.42833 | E11.5 * Wnt1 up vs E11.5 * Ctrl |
| 10576305 | Tcf25         | NM_001037878 | 2.79566e-005 | 1.42738 | E11.5 * Wnt1 up vs E11.5 * Ctrl |
| 10538354 | 1200009O22Rik | BC043099     | 1.43683e-006 | 1.42697 | E11.5 * Wnt1 up vs E11.5 * Ctrl |
| 10492890 | Lrba          | NM_030695    | 2.26725e-005 | 1.42696 | E11.5 * Wnt1 up vs E11.5 * Ctrl |
| 10421648 | Slc25a30      | NM_026232    | 4.33909e-005 | 1.42674 | E11.5 * Wnt1 up vs E11.5 * Ctrl |
| 10435057 | Pcyt1a        | NM_009981    | 0.000241738  | 1.42638 | E11.5 * Wnt1 up vs E11.5 * Ctrl |
| 10458461 | Hdac3         | NM_010411    | 1.41568e-005 | 1.42633 | E11.5 * Wnt1 up vs E11.5 * Ctrl |
| 10358670 | Hmcn1         | NM_001024720 | 0.000222377  | 1.42628 | E11.5 * Wnt1 up vs E11.5 * Ctrl |
| 10409660 | Gkap1         | NM_019832    | 0.00436397   | 1.42544 | E11.5 * Wnt1 up vs E11.5 * Ctrl |
| 10595466 | Pgm3          | NM_028352    | 4.63633e-005 | 1.42541 | E11.5 * Wnt1 up vs E11.5 * Ctrl |
| 10347734 | Sgpp2         | NM_001004173 | 6.61685e-005 | 1.42522 | E11.5 * Wnt1 up vs E11.5 * Ctrl |
| 10535080 | Cox19         | NM_197980    | 0.000404339  | 1.42501 | E11.5 * Wnt1 up vs E11.5 * Ctrl |
| 10540085 | Fbln2         | NM_007992    | 0.00131795   | 1.42383 | E11.5 * Wnt1 up vs E11.5 * Ctrl |
| 10555953 | Fxc1          | NM_019502    | 0.000112024  | 1.42339 | E11.5 * Wnt1 up vs E11.5 * Ctrl |
| 10373728 | Patz1         | NM_019574    | 0.00253785   | 1.4233  | E11.5 * Wnt1 up vs E11.5 * Ctrl |
| 10595680 | Tbc1d2b       | NM_194334    | 0.000209052  | 1.42322 | E11.5 * Wnt1 up vs E11.5 * Ctrl |
| 10409021 | Tpmt          | NM_016785    | 0.000264184  | 1.42305 | E11.5 * Wnt1 up vs E11.5 * Ctrl |
| 10430748 | Rangap1       | NM_011241    | 0.00136237   | 1.42277 | E11.5 * Wnt1 up vs E11.5 * Ctrl |
| 10373113 | Kif5a         | NM_008447    | 0.00407199   | 1.42248 | E11.5 * Wnt1 up vs E11.5 * Ctrl |
| 10463535 | Nolc1         | NM_053086    | 8.94757e-006 | 1.4223  | E11.5 * Wnt1 up vs E11.5 * Ctrl |
| 10479514 | Col20a1       | BC016112     | 0.000760168  | 1.42218 | E11.5 * Wnt1 up vs E11.5 * Ctrl |
| 10511580 | Ppm2c         | NM_001098230 | 2.38987e-005 | 1.42206 | E11.5 * Wnt1 up vs E11.5 * Ctrl |
| 10592891 | Phldb1        | NM_153537    | 0.00013569   | 1.42175 | E11.5 * Wnt1 up vs E11.5 * Ctrl |
| 10576274 | Zfp276        | NM_020497    | 0.000514215  | 1.42132 | E11.5 * Wnt1 up vs E11.5 * Ctrl |
| 10404702 | Gcnt2         | NM_023887    | 0.00010111   | 1.42103 | E11.5 * Wnt1 up vs E11.5 * Ctrl |
| 10447341 | Rhoq          | NM_145491    | 0.000324178  | 1.42078 | E11.5 * Wnt1 up vs E11.5 * Ctrl |
| 10474977 | 1500003O03Rik | NM_019769    | 1.21587e-005 | 1.42074 | E11.5 * Wnt1 up vs E11.5 * Ctrl |
| 10363231 | Smpdl3a       | NM_020561    | 0.00169463   | 1.42012 | E11.5 * Wnt1 up vs E11.5 * Ctrl |
| 10381226 | Coasy         | NM_027896    | 0.000693212  | 1.42009 | E11.5 * Wnt1 up vs E11.5 * Ctrl |
| 10583788 | Prkcsb        | NM_008925    | 0.00171533   | 1.41901 | E11.5 * Wnt1 up vs E11.5 * Ctrl |
| 10590909 | Endod1        | NM_028013    | 8.88375e-005 | 1.41887 | E11.5 * Wnt1 up vs E11.5 * Ctrl |
| 10437174 | Wrb           | NM_207301    | 0.00161768   | 1.4183  | E11.5 * Wnt1 up vs E11.5 * Ctrl |
| 10526838 | Got2          | NM_010325    | 2.27294e-005 | 1.41793 | E11.5 * Wnt1 up vs E11.5 * Ctrl |
| 10419578 | Ndrp2         | NM_013864    | 0.000547754  | 1.41791 | E11.5 * Wnt1 up vs E11.5 * Ctrl |
| 10546476 | Magi1         | NM_001029850 | 1.63412e-005 | 1.41789 | E11.5 * Wnt1 up vs E11.5 * Ctrl |
| 10559415 | Leng1         | NM_027203    | 0.000661969  | 1.41716 | E11.5 * Wnt1 up vs E11.5 * Ctrl |
| 10491083 | Aadacl1       | NM_178772    | 0.0009033    | 1.41691 | E11.5 * Wnt1 up vs E11.5 * Ctrl |
| 10568109 | Asphd1        | NM_001039645 | 0.00148379   | 1.4167  | E11.5 * Wnt1 up vs E11.5 * Ctrl |
| 10439218 | Pdia5         | NM_028295    | 4.88268e-006 | 1.41658 | E11.5 * Wnt1 up vs E11.5 * Ctrl |
| 10542791 | Pfifb1        | NM_026221    | 0.000107145  | 1.41622 | E11.5 * Wnt1 up vs E11.5 * Ctrl |
| 10580537 | Aktip         | NM_010241    | 0.00077883   | 1.41575 | E11.5 * Wnt1 up vs E11.5 * Ctrl |
| 10592126 | Fam118b       | NM_194257    | 1.85226e-005 | 1.41523 | E11.5 * Wnt1 up vs E11.5 * Ctrl |
| 10526853 | Fam20c        | NM_030565    | 0.00372974   | 1.41388 | E11.5 * Wnt1 up vs E11.5 * Ctrl |
| 10578984 | Tufm          | NM_172745    | 0.00456527   | 1.41336 | E11.5 * Wnt1 up vs E11.5 * Ctrl |
| 10596545 | Rad54l2       | NM_030730    | 2.06244e-006 | 1.4131  | E11.5 * Wnt1 up vs E11.5 * Ctrl |
| 10572613 | Mrpl34        | NM_053162    | 0.00644638   | 1.41295 | E11.5 * Wnt1 up vs E11.5 * Ctrl |
| 10346235 | Hibch         | NM_146108    | 0.00180791   | 1.41278 | E11.5 * Wnt1 up vs E11.5 * Ctrl |
| 10451763 | Satb1         | NM_009122    | 3.96486e-007 | 1.41208 | E11.5 * Wnt1 up vs E11.5 * Ctrl |
| 10397332 | Eif2b2        | NM_145445    | 0.00663571   | 1.41194 | E11.5 * Wnt1 up vs E11.5 * Ctrl |
| 10362490 | Tspyl4        | NM_030203    | 0.000253091  | 1.41184 | E11.5 * Wnt1 up vs E11.5 * Ctrl |
| 10375730 | ---           | ---          | 0.0026126    | 1.41145 | E11.5 * Wnt1 up vs E11.5 * Ctrl |
| 10383575 | Tbcd          | NM_029878    | 1.19626e-006 | 1.41135 | E11.5 * Wnt1 up vs E11.5 * Ctrl |
| 10415725 | Spata13       | BC138455     | 0.000705536  | 1.4112  | E11.5 * Wnt1 up vs E11.5 * Ctrl |
| 10358668 | Hmcn1         | NM_001024720 | 8.82127e-005 | 1.41099 | E11.5 * Wnt1 up vs E11.5 * Ctrl |
| 10501629 | Cdc14a        | NM_001080818 | 6.61117e-006 | 1.41049 | E11.5 * Wnt1 up vs E11.5 * Ctrl |
| 10606554 | Nap1l3        | NM_138742    | 0.00153239   | 1.41017 | E11.5 * Wnt1 up vs E11.5 * Ctrl |
| 10518147 | Pdpn          | NM_010329    | 0.00877869   | 1.41012 | E11.5 * Wnt1 up vs E11.5 * Ctrl |
| 10492325 | Ube2v1        | NM_023230    | 0.000229056  | 1.4096  | E11.5 * Wnt1 up vs E11.5 * Ctrl |
| 10550274 | Meis3         | NM_008627    | 2.68578e-005 | 1.40916 | E11.5 * Wnt1 up vs E11.5 * Ctrl |
| 10409464 | Dbn1          | NM_019813    | 0.00103498   | 1.40896 | E11.5 * Wnt1 up vs E11.5 * Ctrl |
| 10355141 | Klf7          | NM_033563    | 4.66538e-006 | 1.40817 | E11.5 * Wnt1 up vs E11.5 * Ctrl |
| 10529041 | Preb          | NM_016703    | 0.00351691   | 1.40772 | E11.5 * Wnt1 up vs E11.5 * Ctrl |
| 10388018 | Dhx33         | NM_178367    | 0.000315102  | 1.40768 | E11.5 * Wnt1 up vs E11.5 * Ctrl |
| 10562211 | Fxyd1         | NM_052992    | 0.00370171   | 1.40764 | E11.5 * Wnt1 up vs E11.5 * Ctrl |
| 10515943 | Ctps          | NM_016748    | 2.19575e-005 | 1.40739 | E11.5 * Wnt1 up vs E11.5 * Ctrl |
| 10517488 | Ephb2         | NM_010142    | 0.000346285  | 1.40727 | E11.5 * Wnt1 up vs E11.5 * Ctrl |

|                       |                     |              |         |                                 |
|-----------------------|---------------------|--------------|---------|---------------------------------|
| 10524882 Wsb2         | NM_021539           | 0.000503754  | 1.40701 | E11.5 * Wnt1 up vs E11.5 * Ctrl |
| 10501319 Celsr2       | NM_017392           | 0.000919283  | 1.407   | E11.5 * Wnt1 up vs E11.5 * Ctrl |
| 10533858 Eif2b1       | NM_145371           | 1.74131e-006 | 1.40686 | E11.5 * Wnt1 up vs E11.5 * Ctrl |
| 10561679 Psmd8        | NM_026545           | 6.89193e-005 | 1.40671 | E11.5 * Wnt1 up vs E11.5 * Ctrl |
| 10419966 Zfhx2        | NM_001039198        | 0.00209478   | 1.40533 | E11.5 * Wnt1 up vs E11.5 * Ctrl |
| 10358733 Rgl1         | NM_016846           | 0.0006032    | 1.4052  | E11.5 * Wnt1 up vs E11.5 * Ctrl |
| 10477994 Ctnnb1       | NM_025680           | 3.45325e-005 | 1.4047  | E11.5 * Wnt1 up vs E11.5 * Ctrl |
| 10583929 B3gat1       | NM_029792           | 0.000182413  | 1.40457 | E11.5 * Wnt1 up vs E11.5 * Ctrl |
| 10480950 D2Bwg1335e   | NM_026828           | 0.000406098  | 1.4045  | E11.5 * Wnt1 up vs E11.5 * Ctrl |
| 10354031 Tsga10       | NM_207228           | 0.00592661   | 1.40366 | E11.5 * Wnt1 up vs E11.5 * Ctrl |
| 10494007 Them4        | NM_029431           | 0.00330071   | 1.40363 | E11.5 * Wnt1 up vs E11.5 * Ctrl |
| 10571384 Efha2        | ENSMUST00000        | 0.000825254  | 1.40328 | E11.5 * Wnt1 up vs E11.5 * Ctrl |
| 10531146 Mkrr1-ps1    | AF494488            | 0.00131828   | 1.40314 | E11.5 * Wnt1 up vs E11.5 * Ctrl |
| 10427772 Tars         | NM_033074           | 0.000398595  | 1.4016  | E11.5 * Wnt1 up vs E11.5 * Ctrl |
| 10578916 Sc4mol       | NM_025436           | 0.00242051   | 1.40152 | E11.5 * Wnt1 up vs E11.5 * Ctrl |
| 10388227 Cyb5d2       | NM_001024926        | 0.00491853   | 1.40122 | E11.5 * Wnt1 up vs E11.5 * Ctrl |
| 10516894 Rcc1         | NM_133878           | 0.000712153  | 1.40107 | E11.5 * Wnt1 up vs E11.5 * Ctrl |
| 10523479 Slc25a5      | NM_007451           | 1.7845e-005  | 1.40105 | E11.5 * Wnt1 up vs E11.5 * Ctrl |
| 10412227 Snx18        | NM_130796           | 2.73929e-005 | 1.40077 | E11.5 * Wnt1 up vs E11.5 * Ctrl |
| 10402318 Prima1       | NM_133364           | 0.00753324   | 1.40056 | E11.5 * Wnt1 up vs E11.5 * Ctrl |
| 10381744 Arf2         | NM_007477           | 0.000173918  | 1.40054 | E11.5 * Wnt1 up vs E11.5 * Ctrl |
| 10528227 Gnai1        | NM_010305           | 0.000184582  | 1.40043 | E11.5 * Wnt1 up vs E11.5 * Ctrl |
| 10486875 Frmd5        | NM_172673           | 0.000473592  | 1.4003  | E11.5 * Wnt1 up vs E11.5 * Ctrl |
| 10390211 Igf2bp1      | NM_009951           | 0.00223197   | 1.39975 | E11.5 * Wnt1 up vs E11.5 * Ctrl |
| 10401753 Al413782     | NM_001142580        | 0.000357728  | 1.39965 | E11.5 * Wnt1 up vs E11.5 * Ctrl |
| 10533729 Vps37b       | NM_177876           | 0.000755855  | 1.39959 | E11.5 * Wnt1 up vs E11.5 * Ctrl |
| 10432190 Adcy6        | NM_007405           | 0.00717413   | 1.39937 | E11.5 * Wnt1 up vs E11.5 * Ctrl |
| 10382912              | 09-Sep NM_001113486 | 5.51119e-005 | 1.39929 | E11.5 * Wnt1 up vs E11.5 * Ctrl |
| 10594501 Ptplad1      | NM_021345           | 0.0007452    | 1.39878 | E11.5 * Wnt1 up vs E11.5 * Ctrl |
| 10366866 Dctn2        | NM_027151           | 0.00242071   | 1.39823 | E11.5 * Wnt1 up vs E11.5 * Ctrl |
| 10574204 Arl2bp       | NM_024191           | 2.83168e-006 | 1.39756 | E11.5 * Wnt1 up vs E11.5 * Ctrl |
| 10417713 Rarb         | NM_011243           | 0.00025335   | 1.39755 | E11.5 * Wnt1 up vs E11.5 * Ctrl |
| 10591726 Ecsit        | NM_012029           | 0.000272092  | 1.39745 | E11.5 * Wnt1 up vs E11.5 * Ctrl |
| 10475708 Blvra        | NM_026678           | 0.000125738  | 1.39739 | E11.5 * Wnt1 up vs E11.5 * Ctrl |
| 10387757 Rai12        | NM_018740           | 0.00165863   | 1.39735 | E11.5 * Wnt1 up vs E11.5 * Ctrl |
| 10571344 D8Ert82e     | NM_172911           | 0.000799156  | 1.39681 | E11.5 * Wnt1 up vs E11.5 * Ctrl |
| 10520842 Bre          | NM_181279           | 6.23165e-005 | 1.39664 | E11.5 * Wnt1 up vs E11.5 * Ctrl |
| 10414325 Cgrrf1       | NM_026832           | 0.00515156   | 1.39612 | E11.5 * Wnt1 up vs E11.5 * Ctrl |
| 10429908 Bop1         | NM_013481           | 0.000958352  | 1.39609 | E11.5 * Wnt1 up vs E11.5 * Ctrl |
| 10362767 Mical1       | NM_138315           | 0.000470568  | 1.39589 | E11.5 * Wnt1 up vs E11.5 * Ctrl |
| 10349239 Mki67ip      | NM_026472           | 6.91645e-005 | 1.39584 | E11.5 * Wnt1 up vs E11.5 * Ctrl |
| 10419288 Gch1         | NM_008102           | 0.00119264   | 1.39576 | E11.5 * Wnt1 up vs E11.5 * Ctrl |
| 10498204 ENSMUSG0000C | ENSMUST00000        | 0.00501889   | 1.39463 | E11.5 * Wnt1 up vs E11.5 * Ctrl |
| 10406856 Gm807        | ENSMUST00000        | 0.00348183   | 1.39457 | E11.5 * Wnt1 up vs E11.5 * Ctrl |
| 10427035 Nr4a1        | NM_010444           | 0.000437396  | 1.39444 | E11.5 * Wnt1 up vs E11.5 * Ctrl |
| 10430804 Pppde2       | NM_134095           | 0.000426363  | 1.39444 | E11.5 * Wnt1 up vs E11.5 * Ctrl |
| 10400866 Trim9        | NM_053167           | 0.0012536    | 1.39343 | E11.5 * Wnt1 up vs E11.5 * Ctrl |
| 10404941 Aof1         | NM_172262           | 0.000421568  | 1.39319 | E11.5 * Wnt1 up vs E11.5 * Ctrl |
| 10534102 Gusb         | NM_010368           | 0.00121129   | 1.3931  | E11.5 * Wnt1 up vs E11.5 * Ctrl |
| 10353934 Actr1b       | NM_146107           | 0.00663602   | 1.39289 | E11.5 * Wnt1 up vs E11.5 * Ctrl |
| 10430956 Cyb5r3       | NM_029787           | 0.00419671   | 1.39283 | E11.5 * Wnt1 up vs E11.5 * Ctrl |
| 10381416 Rnd2         | NM_009708           | 0.0023031    | 1.39276 | E11.5 * Wnt1 up vs E11.5 * Ctrl |
| 10409338 Nop16        | NM_178605           | 0.00174423   | 1.39249 | E11.5 * Wnt1 up vs E11.5 * Ctrl |
| 10584142 Ets1         | NM_011808           | 0.000146584  | 1.39232 | E11.5 * Wnt1 up vs E11.5 * Ctrl |
| 10363563 Slc25a16     | NM_175194           | 0.00294346   | 1.39227 | E11.5 * Wnt1 up vs E11.5 * Ctrl |
| 10542200 Gabarapl1    | NM_020590           | 9.90827e-005 | 1.39226 | E11.5 * Wnt1 up vs E11.5 * Ctrl |
| 10370824 Mbd3         | NM_013595           | 0.00420163   | 1.39218 | E11.5 * Wnt1 up vs E11.5 * Ctrl |
| 10566281 Dnajc19      | NM_026332           | 0.00610242   | 1.39206 | E11.5 * Wnt1 up vs E11.5 * Ctrl |
| 10510286 Mad2l2       | NM_027985           | 0.000203472  | 1.39206 | E11.5 * Wnt1 up vs E11.5 * Ctrl |
| 10563390 Cyth2        | NM_011181           | 0.0034773    | 1.39142 | E11.5 * Wnt1 up vs E11.5 * Ctrl |
| 10501244 Ampd2        | NM_028779           | 0.000610567  | 1.39096 | E11.5 * Wnt1 up vs E11.5 * Ctrl |
| 10381574 Rundc3a      | NM_016759           | 0.00062423   | 1.39092 | E11.5 * Wnt1 up vs E11.5 * Ctrl |
| 10584422 Olfr908      | NM_146872           | 0.00020545   | 1.3908  | E11.5 * Wnt1 up vs E11.5 * Ctrl |
| 10436369 Filip1l      | NM_030163           | 2.17876e-006 | 1.39053 | E11.5 * Wnt1 up vs E11.5 * Ctrl |
| 10507040 Spata6       | NM_026470           | 0.00119851   | 1.3905  | E11.5 * Wnt1 up vs E11.5 * Ctrl |
| 10511226 Acap3        | NM_207223           | 0.00015392   | 1.39033 | E11.5 * Wnt1 up vs E11.5 * Ctrl |

|          |               |               |              |         |                                 |
|----------|---------------|---------------|--------------|---------|---------------------------------|
| 10388749 | Traf4         | NM_009423     | 0.000506842  | 1.3903  | E11.5 * Wnt1 up vs E11.5 * Ctrl |
| 10557450 | Bola2         | NM_175103     | 2.15638e-005 | 1.39003 | E11.5 * Wnt1 up vs E11.5 * Ctrl |
| 10413255 | Duxbl         | NM_183389     | 0.00245655   | 1.38953 | E11.5 * Wnt1 up vs E11.5 * Ctrl |
| 10413265 | Duxbl         | NM_183389     | 0.00245655   | 1.38953 | E11.5 * Wnt1 up vs E11.5 * Ctrl |
| 10374529 | AV249152      | NM_145425     | 0.000563737  | 1.38894 | E11.5 * Wnt1 up vs E11.5 * Ctrl |
| 10371321 | Slc41a2       | NM_177388     | 0.00542056   | 1.38882 | E11.5 * Wnt1 up vs E11.5 * Ctrl |
| 10380648 | Hoxb4         | NM_010459     | 0.000141775  | 1.38882 | E11.5 * Wnt1 up vs E11.5 * Ctrl |
| 10547553 | Mical3        | NM_153396     | 0.000169386  | 1.38867 | E11.5 * Wnt1 up vs E11.5 * Ctrl |
| 10408975 | Kif13a        | NM_010617     | 0.000370178  | 1.38864 | E11.5 * Wnt1 up vs E11.5 * Ctrl |
| 10376813 | Cytsb         | NM_001029936  | 9.7813e-005  | 1.38759 | E11.5 * Wnt1 up vs E11.5 * Ctrl |
| 10447490 | Pja2          | NM_001025309  | 1.28523e-006 | 1.38698 | E11.5 * Wnt1 up vs E11.5 * Ctrl |
| 10496110 | Papss1        | NM_011863     | 0.00061408   | 1.38677 | E11.5 * Wnt1 up vs E11.5 * Ctrl |
| 10519951 | Pion          | NM_175437     | 0.00351428   | 1.38653 | E11.5 * Wnt1 up vs E11.5 * Ctrl |
| 10597323 | Arpp21        | NM_033264     | 2.49231e-005 | 1.38623 | E11.5 * Wnt1 up vs E11.5 * Ctrl |
| 10405757 | 201011101Rik  | NM_028079     | 0.000241217  | 1.38617 | E11.5 * Wnt1 up vs E11.5 * Ctrl |
| 10585601 | Snupn         | NM_178374     | 0.000533258  | 1.38606 | E11.5 * Wnt1 up vs E11.5 * Ctrl |
| 10578623 | Wwc2          | NM_133791     | 5.64672e-006 | 1.38559 | E11.5 * Wnt1 up vs E11.5 * Ctrl |
| 10388648 | Ankrd13b      | NM_172945     | 0.000926243  | 1.38537 | E11.5 * Wnt1 up vs E11.5 * Ctrl |
| 10440929 | Gart          | NM_010256     | 2.85002e-005 | 1.38508 | E11.5 * Wnt1 up vs E11.5 * Ctrl |
| 10393836 | Arhgdia       | NM_133796     | 0.00728596   | 1.38461 | E11.5 * Wnt1 up vs E11.5 * Ctrl |
| 10507804 | Trit1         | NM_025873     | 0.00232407   | 1.38456 | E11.5 * Wnt1 up vs E11.5 * Ctrl |
| 10570513 | 2900016B01Rik | ENSMUST000001 | 0.00298011   | 1.38455 | E11.5 * Wnt1 up vs E11.5 * Ctrl |
| 10454735 | Fam53c        | BC057111      | 0.00390731   | 1.38446 | E11.5 * Wnt1 up vs E11.5 * Ctrl |
| 10430489 | Pla2g6        | NM_016915     | 0.000332392  | 1.38438 | E11.5 * Wnt1 up vs E11.5 * Ctrl |
| 10481128 | Med22         | NM_011513     | 0.00290101   | 1.38434 | E11.5 * Wnt1 up vs E11.5 * Ctrl |
| 10589800 | Clasp2        | NM_001114347  | 2.84921e-007 | 1.38421 | E11.5 * Wnt1 up vs E11.5 * Ctrl |
| 10350247 | Kif21b        | NM_001039472  | 0.00013826   | 1.38407 | E11.5 * Wnt1 up vs E11.5 * Ctrl |
| 10590663 | Gria4         | NM_019691     | 0.000237643  | 1.38373 | E11.5 * Wnt1 up vs E11.5 * Ctrl |
| 10365260 | Txnrd1        | NM_001042523  | 4.40481e-007 | 1.38355 | E11.5 * Wnt1 up vs E11.5 * Ctrl |
| 10433620 | Ercc4         | NM_015769     | 0.00350976   | 1.38345 | E11.5 * Wnt1 up vs E11.5 * Ctrl |
| 10454077 | Taf4b         | NM_001100449  | 0.000253922  | 1.38241 | E11.5 * Wnt1 up vs E11.5 * Ctrl |
| 10599232 | Nkap          | NM_025937     | 0.00442251   | 1.38169 | E11.5 * Wnt1 up vs E11.5 * Ctrl |
| 10525111 | Ddx54         | NM_028041     | 0.000814118  | 1.38162 | E11.5 * Wnt1 up vs E11.5 * Ctrl |
| 10355958 | Ube2v1        | NM_023230     | 0.000779371  | 1.38156 | E11.5 * Wnt1 up vs E11.5 * Ctrl |
| 10440738 | Tiam1         | NM_009384     | 0.000320044  | 1.3815  | E11.5 * Wnt1 up vs E11.5 * Ctrl |
| 10465011 | Sart1         | NM_016882     | 5.56166e-005 | 1.38121 | E11.5 * Wnt1 up vs E11.5 * Ctrl |
| 10456346 | Sec11c        | NM_025468     | 0.000631222  | 1.38119 | E11.5 * Wnt1 up vs E11.5 * Ctrl |
| 10382508 | Ict1          | NM_026729     | 0.00362979   | 1.38108 | E11.5 * Wnt1 up vs E11.5 * Ctrl |
| 10552311 | OTTMUSG00000  | XR_030737     | 0.000176161  | 1.38097 | E11.5 * Wnt1 up vs E11.5 * Ctrl |
| 10374119 | Ogdh          | NM_010956     | 0.00132214   | 1.38029 | E11.5 * Wnt1 up vs E11.5 * Ctrl |
| 10516305 | Mtap7d1       | NM_144941     | 2.54234e-006 | 1.38014 | E11.5 * Wnt1 up vs E11.5 * Ctrl |
| 10361007 | Smyd2         | NM_026796     | 5.17024e-006 | 1.38008 | E11.5 * Wnt1 up vs E11.5 * Ctrl |
| 10383970 | Kremen1       | NM_032396     | 0.000479315  | 1.37987 | E11.5 * Wnt1 up vs E11.5 * Ctrl |
| 10355214 | Idh1          | NM_010497     | 1.07366e-005 | 1.37986 | E11.5 * Wnt1 up vs E11.5 * Ctrl |
| 10498775 | Golim4        | NM_175193     | 4.84611e-005 | 1.37969 | E11.5 * Wnt1 up vs E11.5 * Ctrl |
| 10383799 | Tcn2          | NM_015749     | 8.88861e-005 | 1.37967 | E11.5 * Wnt1 up vs E11.5 * Ctrl |
| 10398483 | Dync1h1       | NM_030238     | 2.83763e-005 | 1.37957 | E11.5 * Wnt1 up vs E11.5 * Ctrl |
| 10456378 | Chmp1b        | NM_024190     | 0.00691463   | 1.37911 | E11.5 * Wnt1 up vs E11.5 * Ctrl |
| 10409352 | Rnf44         | NR_027395     | 0.000403254  | 1.37906 | E11.5 * Wnt1 up vs E11.5 * Ctrl |
| 10511207 | Cpsf3l        | NM_028020     | 8.52342e-005 | 1.37886 | E11.5 * Wnt1 up vs E11.5 * Ctrl |
| 10468533 | Gpam          | NM_008149     | 7.49001e-005 | 1.37872 | E11.5 * Wnt1 up vs E11.5 * Ctrl |
| 10547540 | Mical3        | BC043122      | 0.00322093   | 1.37871 | E11.5 * Wnt1 up vs E11.5 * Ctrl |
| 10423629 | Pop1          | NM_152894     | 0.000415882  | 1.37804 | E11.5 * Wnt1 up vs E11.5 * Ctrl |
| 10363173 | Gja1          | NM_010288     | 1.22271e-005 | 1.37795 | E11.5 * Wnt1 up vs E11.5 * Ctrl |
| 10390175 | Ngfr          | NM_033217     | 0.000548954  | 1.37778 | E11.5 * Wnt1 up vs E11.5 * Ctrl |
| 10582981 | Tfdp1         | NM_009361     | 4.34318e-005 | 1.37723 | E11.5 * Wnt1 up vs E11.5 * Ctrl |
| 10424126 | Depdc6        | NM_001037937  | 0.000147334  | 1.37631 | E11.5 * Wnt1 up vs E11.5 * Ctrl |
| 10587627 | Cyb5r4        | NM_024195     | 0.000111379  | 1.37609 | E11.5 * Wnt1 up vs E11.5 * Ctrl |
| 10425578 | Zc3h7b        | NM_001081016  | 0.00868421   | 1.37542 | E11.5 * Wnt1 up vs E11.5 * Ctrl |
| 10540544 | Thumpd3       | NM_008188     | 3.853e-005   | 1.37476 | E11.5 * Wnt1 up vs E11.5 * Ctrl |
| 10355996 | Slc25a5       | NM_007451     | 3.38503e-005 | 1.37463 | E11.5 * Wnt1 up vs E11.5 * Ctrl |
| 10452000 | Dpp9          | NM_172624     | 0.00064183   | 1.37449 | E11.5 * Wnt1 up vs E11.5 * Ctrl |
| 10455901 | Slc27a6       | NM_001081072  | 0.00567942   | 1.37386 | E11.5 * Wnt1 up vs E11.5 * Ctrl |
| 10373571 | 1110012D08Rik | BC037624      | 0.00202063   | 1.3738  | E11.5 * Wnt1 up vs E11.5 * Ctrl |
| 10511810 | Pou3f2        | ENSMUST000001 | 0.00184536   | 1.37359 | E11.5 * Wnt1 up vs E11.5 * Ctrl |
| 10477649 | Acss2         | NM_019811     | 0.000284416  | 1.37357 | E11.5 * Wnt1 up vs E11.5 * Ctrl |

|          |               |              |              |         |                                 |
|----------|---------------|--------------|--------------|---------|---------------------------------|
| 10392983 | Slc25a19      | NM_026071    | 0.000691638  | 1.37342 | E11.5 * Wnt1 up vs E11.5 * Ctrl |
| 10596583 | Dock3         | NM_153413    | 0.000646435  | 1.37322 | E11.5 * Wnt1 up vs E11.5 * Ctrl |
| 10344624 | Lyp1a1        | NM_008866    | 0.00114194   | 1.37305 | E11.5 * Wnt1 up vs E11.5 * Ctrl |
| 10489985 | Atp9a         | NM_015731    | 0.00505408   | 1.37304 | E11.5 * Wnt1 up vs E11.5 * Ctrl |
| 10566512 | ---           | ---          | 0.00105528   | 1.37268 | E11.5 * Wnt1 up vs E11.5 * Ctrl |
| 10504008 | Chmp5         | NM_029814    | 3.80947e-005 | 1.37262 | E11.5 * Wnt1 up vs E11.5 * Ctrl |
| 10514896 | 2210012G02Rik | NM_025617    | 0.00116723   | 1.37227 | E11.5 * Wnt1 up vs E11.5 * Ctrl |
| 10550638 | Rtn2          | NM_013648    | 1.55912e-005 | 1.372   | E11.5 * Wnt1 up vs E11.5 * Ctrl |
| 10593927 | Scamp5        | NM_020270    | 0.00325742   | 1.37196 | E11.5 * Wnt1 up vs E11.5 * Ctrl |
| 10575249 | Txn14b        | NM_175646    | 0.00040437   | 1.37154 | E11.5 * Wnt1 up vs E11.5 * Ctrl |
| 10380986 | Psmd3         | NM_009439    | 0.000432377  | 1.3715  | E11.5 * Wnt1 up vs E11.5 * Ctrl |
| 10578027 | Mak16         | NM_026453    | 0.00247141   | 1.37117 | E11.5 * Wnt1 up vs E11.5 * Ctrl |
| 10567022 | Btd10         | NM_133700    | 0.0025995    | 1.37117 | E11.5 * Wnt1 up vs E11.5 * Ctrl |
| 10535025 | Got2          | NM_010325    | 0.00182641   | 1.37082 | E11.5 * Wnt1 up vs E11.5 * Ctrl |
| 10476817 | Atpaf1        | NM_181040    | 0.00206203   | 1.37062 | E11.5 * Wnt1 up vs E11.5 * Ctrl |
| 10546163 | Mcm2          | NM_008564    | 0.00178943   | 1.37044 | E11.5 * Wnt1 up vs E11.5 * Ctrl |
| 10566804 | Tmem9b        | NM_020050    | 0.000799243  | 1.37035 | E11.5 * Wnt1 up vs E11.5 * Ctrl |
| 10558248 | Bub3          | NM_009774    | 2.18191e-006 | 1.37011 | E11.5 * Wnt1 up vs E11.5 * Ctrl |
| 10382376 | Ttyh2         | NM_053273    | 0.00204665   | 1.36956 | E11.5 * Wnt1 up vs E11.5 * Ctrl |
| 10413243 | Duxbl         | NM_183389    | 0.00345069   | 1.36953 | E11.5 * Wnt1 up vs E11.5 * Ctrl |
| 10525726 | 2810006K23Rik | NM_028310    | 0.00144745   | 1.36918 | E11.5 * Wnt1 up vs E11.5 * Ctrl |
| 10432404 | Tuba1a        | NM_011653    | 2.53276e-005 | 1.36835 | E11.5 * Wnt1 up vs E11.5 * Ctrl |
| 10427590 | Slc1a3        | NM_148938    | 0.00554116   | 1.36822 | E11.5 * Wnt1 up vs E11.5 * Ctrl |
| 10527133 | Wipi2         | NM_178398    | 0.000956918  | 1.36811 | E11.5 * Wnt1 up vs E11.5 * Ctrl |
| 10468309 | 2310014D11Rik | AK009333     | 0.000376917  | 1.36802 | E11.5 * Wnt1 up vs E11.5 * Ctrl |
| 10373740 | Pik3ip1       | NM_178149    | 0.0008263    | 1.36778 | E11.5 * Wnt1 up vs E11.5 * Ctrl |
| 10365729 | Pctk2         | NM_146239    | 7.34456e-006 | 1.36744 | E11.5 * Wnt1 up vs E11.5 * Ctrl |
| 10565315 | Fah           | NM_010176    | 0.00643238   | 1.36739 | E11.5 * Wnt1 up vs E11.5 * Ctrl |
| 10412921 | Nid2          | NM_008695    | 4.38529e-005 | 1.36737 | E11.5 * Wnt1 up vs E11.5 * Ctrl |
| 10430997 | Pacsin2       | NM_011862    | 0.000327482  | 1.36701 | E11.5 * Wnt1 up vs E11.5 * Ctrl |
| 10460879 | Men1          | NM_008583    | 0.00174367   | 1.36667 | E11.5 * Wnt1 up vs E11.5 * Ctrl |
| 10407222 | Dhx29         | NM_172594    | 0.000261181  | 1.36663 | E11.5 * Wnt1 up vs E11.5 * Ctrl |
| 10393387 | Jmjd6         | NM_033398    | 0.000130677  | 1.36609 | E11.5 * Wnt1 up vs E11.5 * Ctrl |
| 10430370 | EG626952      | XM_891575    | 0.00287482   | 1.36565 | E11.5 * Wnt1 up vs E11.5 * Ctrl |
| 10362922 | Atg5          | NM_053069    | 0.000223955  | 1.36539 | E11.5 * Wnt1 up vs E11.5 * Ctrl |
| 10538420 | Gars          | NM_180678    | 1.09844e-006 | 1.36532 | E11.5 * Wnt1 up vs E11.5 * Ctrl |
| 10410929 | Agk           | NM_023538    | 0.00249844   | 1.36528 | E11.5 * Wnt1 up vs E11.5 * Ctrl |
| 10376557 | Nt5m          | NM_134029    | 0.000849968  | 1.36524 | E11.5 * Wnt1 up vs E11.5 * Ctrl |
| 10503508 | Ggh           | NM_010281    | 0.000971046  | 1.36498 | E11.5 * Wnt1 up vs E11.5 * Ctrl |
| 10503523 | Ggh           | NM_010281    | 0.000971046  | 1.36498 | E11.5 * Wnt1 up vs E11.5 * Ctrl |
| 10372145 | Alx1          | NM_172553    | 0.00861982   | 1.36487 | E11.5 * Wnt1 up vs E11.5 * Ctrl |
| 10407955 | Epdr1         | NM_134065    | 0.00235543   | 1.36433 | E11.5 * Wnt1 up vs E11.5 * Ctrl |
| 10557705 | Phkg2         | NM_026888    | 0.000155285  | 1.36425 | E11.5 * Wnt1 up vs E11.5 * Ctrl |
| 10482824 | Acvr1         | NM_001110204 | 1.95781e-006 | 1.36412 | E11.5 * Wnt1 up vs E11.5 * Ctrl |
| 10364890 | Sf3a2         | NM_013651    | 0.0081757    | 1.36399 | E11.5 * Wnt1 up vs E11.5 * Ctrl |
| 10457853 | Ino80c        | NM_172625    | 0.00360158   | 1.36377 | E11.5 * Wnt1 up vs E11.5 * Ctrl |
| 10575550 | Aars          | NM_146217    | 6.78779e-005 | 1.36368 | E11.5 * Wnt1 up vs E11.5 * Ctrl |
| 10599215 | Slc25a5       | NM_007451    | 2.51365e-005 | 1.36358 | E11.5 * Wnt1 up vs E11.5 * Ctrl |
| 10394611 | Nbas          | ENSMUST00000 | 0.000137548  | 1.36239 | E11.5 * Wnt1 up vs E11.5 * Ctrl |
| 10458293 | Dnajc18       | NM_029669    | 0.000283066  | 1.36219 | E11.5 * Wnt1 up vs E11.5 * Ctrl |
| 10534974 | Mcm7          | NM_008568    | 0.00224244   | 1.36194 | E11.5 * Wnt1 up vs E11.5 * Ctrl |
| 10362941 | Prep          | NM_011156    | 0.000192149  | 1.36145 | E11.5 * Wnt1 up vs E11.5 * Ctrl |
| 10405729 | Selk          | NM_019979    | 0.0027417    | 1.3613  | E11.5 * Wnt1 up vs E11.5 * Ctrl |
| 10590983 | Panx1         | NM_019482    | 0.000454975  | 1.3611  | E11.5 * Wnt1 up vs E11.5 * Ctrl |
| 10413220 | ENSMUSG0000C  | ENSMUST00000 | 0.00225011   | 1.36099 | E11.5 * Wnt1 up vs E11.5 * Ctrl |
| 10398972 | Mta1          | NM_054081    | 0.00279745   | 1.36043 | E11.5 * Wnt1 up vs E11.5 * Ctrl |
| 10566516 | Rrp8          | NM_025897    | 0.00147793   | 1.35945 | E11.5 * Wnt1 up vs E11.5 * Ctrl |
| 10508420 | Yars          | NM_134151    | 0.000844864  | 1.3592  | E11.5 * Wnt1 up vs E11.5 * Ctrl |
| 10392207 | Tex2          | NM_198292    | 0.002766     | 1.35882 | E11.5 * Wnt1 up vs E11.5 * Ctrl |
| 10507379 | Zswim5        | NM_001029912 | 0.000682913  | 1.35881 | E11.5 * Wnt1 up vs E11.5 * Ctrl |
| 10403455 | Dip2c         | NM_001081426 | 0.000328348  | 1.35852 | E11.5 * Wnt1 up vs E11.5 * Ctrl |
| 10566067 | Rnf121        | NM_029211    | 0.00461269   | 1.35838 | E11.5 * Wnt1 up vs E11.5 * Ctrl |
| 10438262 | Slc25a1       | NM_153150    | 0.0024521    | 1.35837 | E11.5 * Wnt1 up vs E11.5 * Ctrl |
| 10426093 | Zbed4         | NM_181412    | 4.75127e-005 | 1.35834 | E11.5 * Wnt1 up vs E11.5 * Ctrl |
| 10428222 | Ncald         | NM_134094    | 0.000184952  | 1.35811 | E11.5 * Wnt1 up vs E11.5 * Ctrl |
| 10431410 | Mapk11        | NM_011161    | 0.00183073   | 1.35805 | E11.5 * Wnt1 up vs E11.5 * Ctrl |

|          |               |              |              |         |                                 |
|----------|---------------|--------------|--------------|---------|---------------------------------|
| 10404840 | Cd83          | NM_009856    | 0.000310395  | 1.35774 | E11.5 * Wnt1 up vs E11.5 * Ctrl |
| 10536541 | St7           | NM_022332    | 0.00051759   | 1.35771 | E11.5 * Wnt1 up vs E11.5 * Ctrl |
| 10463211 | Pi4k2a        | NM_145501    | 0.0047606    | 1.35766 | E11.5 * Wnt1 up vs E11.5 * Ctrl |
| 10561527 | Actn4         | NM_021895    | 0.00293243   | 1.35749 | E11.5 * Wnt1 up vs E11.5 * Ctrl |
| 10449452 | Fkbp5         | NM_010220    | 0.00106333   | 1.3573  | E11.5 * Wnt1 up vs E11.5 * Ctrl |
| 10379564 | Lig3          | NM_010716    | 6.22034e-005 | 1.357   | E11.5 * Wnt1 up vs E11.5 * Ctrl |
| 10544462 | Fam115a       | NM_029930    | 0.000513696  | 1.3567  | E11.5 * Wnt1 up vs E11.5 * Ctrl |
| 10561004 | Erf           | NM_010155    | 0.000531904  | 1.35663 | E11.5 * Wnt1 up vs E11.5 * Ctrl |
| 10469613 | Thnsl1        | NM_177588    | 0.000775342  | 1.35651 | E11.5 * Wnt1 up vs E11.5 * Ctrl |
| 10563037 | Scaf1         | NM_001008422 | 0.00273568   | 1.35587 | E11.5 * Wnt1 up vs E11.5 * Ctrl |
| 10368011 | Vta1          | NM_025418    | 5.82879e-005 | 1.35572 | E11.5 * Wnt1 up vs E11.5 * Ctrl |
| 10411332 | Hmgcr         | NM_008255    | 0.00297317   | 1.35566 | E11.5 * Wnt1 up vs E11.5 * Ctrl |
| 10465282 | Pola2         | NM_008893    | 0.00367627   | 1.35548 | E11.5 * Wnt1 up vs E11.5 * Ctrl |
| 10382022 | Ccdc44        | NM_027346    | 0.00533901   | 1.35508 | E11.5 * Wnt1 up vs E11.5 * Ctrl |
| 10532538 | Asphd2        | NM_028386    | 0.00165655   | 1.35505 | E11.5 * Wnt1 up vs E11.5 * Ctrl |
| 10367843 | Utrn          | NM_011682    | 7.05258e-005 | 1.35485 | E11.5 * Wnt1 up vs E11.5 * Ctrl |
| 10387111 | 2310004I24Rik | NM_025510    | 0.00115733   | 1.35474 | E11.5 * Wnt1 up vs E11.5 * Ctrl |
| 10371230 | Gna11         | NM_010301    | 0.0013739    | 1.35449 | E11.5 * Wnt1 up vs E11.5 * Ctrl |
| 10579437 | Ccdc124       | NM_026964    | 0.00437373   | 1.35439 | E11.5 * Wnt1 up vs E11.5 * Ctrl |
| 10382701 | Sap30bp       | NM_020483    | 0.00233552   | 1.35438 | E11.5 * Wnt1 up vs E11.5 * Ctrl |
| 10464877 | Dpp3          | NM_133803    | 0.00106611   | 1.35433 | E11.5 * Wnt1 up vs E11.5 * Ctrl |
| 10589685 | Lrrc2         | NM_028838    | 0.00674175   | 1.35402 | E11.5 * Wnt1 up vs E11.5 * Ctrl |
| 10403466 | Dip2c         | NM_001081426 | 0.000456818  | 1.35374 | E11.5 * Wnt1 up vs E11.5 * Ctrl |
| 10585509 | Fbxo22        | NM_028049    | 0.00221322   | 1.35345 | E11.5 * Wnt1 up vs E11.5 * Ctrl |
| 10584941 | Bace1         | NM_011792    | 0.00155592   | 1.35332 | E11.5 * Wnt1 up vs E11.5 * Ctrl |
| 10477012 | Fkbp1a        | NM_008019    | 0.000125029  | 1.35326 | E11.5 * Wnt1 up vs E11.5 * Ctrl |
| 10365518 | Nt5dc3        | NM_175331    | 0.00610044   | 1.35307 | E11.5 * Wnt1 up vs E11.5 * Ctrl |
| 10516666 | Txlna         | NM_001005506 | 0.00036158   | 1.35305 | E11.5 * Wnt1 up vs E11.5 * Ctrl |
| 10600114 | Pnma3         | NM_153169    | 0.00449485   | 1.35303 | E11.5 * Wnt1 up vs E11.5 * Ctrl |
| 10556005 | Ilk           | NM_010562    | 3.3205e-005  | 1.35286 | E11.5 * Wnt1 up vs E11.5 * Ctrl |
| 10369877 | Ube2d1        | NM_145420    | 4.68162e-005 | 1.35273 | E11.5 * Wnt1 up vs E11.5 * Ctrl |
| 10367413 | Dnajc14       | NM_028873    | 0.000287872  | 1.35228 | E11.5 * Wnt1 up vs E11.5 * Ctrl |
| 10417183 | Pcca          | NM_144844    | 0.000410868  | 1.35218 | E11.5 * Wnt1 up vs E11.5 * Ctrl |
| 10529344 | Poln          | NM_181857    | 8.00559e-005 | 1.35207 | E11.5 * Wnt1 up vs E11.5 * Ctrl |
| 10386789 | Ulk2          | NM_013881    | 1.22857e-006 | 1.3519  | E11.5 * Wnt1 up vs E11.5 * Ctrl |
| 10544858 | Chn2          | NM_023543    | 0.00706296   | 1.35189 | E11.5 * Wnt1 up vs E11.5 * Ctrl |
| 10380415 | Cdc34         | BC094502     | 0.00469687   | 1.35175 | E11.5 * Wnt1 up vs E11.5 * Ctrl |
| 10381697 | Hexim1        | NM_138753    | 0.000165328  | 1.35141 | E11.5 * Wnt1 up vs E11.5 * Ctrl |
| 10510604 | Dnajc11       | NM_172704    | 0.00110251   | 1.35131 | E11.5 * Wnt1 up vs E11.5 * Ctrl |
| 10457205 | Crem          | NM_001110856 | 0.00318741   | 1.35122 | E11.5 * Wnt1 up vs E11.5 * Ctrl |
| 10547521 | Atp6v1e1      | NM_007510    | 0.00285241   | 1.35107 | E11.5 * Wnt1 up vs E11.5 * Ctrl |
| 10430201 | Myh9          | NM_022410    | 0.000488148  | 1.35102 | E11.5 * Wnt1 up vs E11.5 * Ctrl |
| 10575630 | Cntnap4       | NM_130457    | 0.00317229   | 1.35098 | E11.5 * Wnt1 up vs E11.5 * Ctrl |
| 10548745 | Gpr19         | NM_008157    | 0.0015665    | 1.35071 | E11.5 * Wnt1 up vs E11.5 * Ctrl |
| 10580986 | Rbmxt         | NM_009033    | 9.62843e-005 | 1.35064 | E11.5 * Wnt1 up vs E11.5 * Ctrl |
| 10472136 | Galnt13       | NM_173030    | 0.00535693   | 1.35048 | E11.5 * Wnt1 up vs E11.5 * Ctrl |
| 10427026 | Grasp         | NM_019518    | 0.00319741   | 1.3503  | E11.5 * Wnt1 up vs E11.5 * Ctrl |
| 10425461 | Adsl          | NM_009634    | 3.31591e-005 | 1.35004 | E11.5 * Wnt1 up vs E11.5 * Ctrl |
| 10600082 | Nsdhl         | NM_010941    | 0.00324006   | 1.34918 | E11.5 * Wnt1 up vs E11.5 * Ctrl |
| 10558454 | Glrx3         | NM_023140    | 0.00212649   | 1.34867 | E11.5 * Wnt1 up vs E11.5 * Ctrl |
| 10575129 | Vps4a         | NM_126165    | 8.34407e-006 | 1.34777 | E11.5 * Wnt1 up vs E11.5 * Ctrl |
| 10405619 | 5133401N09Rik | NM_198004    | 0.00011999   | 1.34774 | E11.5 * Wnt1 up vs E11.5 * Ctrl |
| 10368918 | Sobp          | NM_175407    | 0.000208555  | 1.34752 | E11.5 * Wnt1 up vs E11.5 * Ctrl |
| 10345357 | Imp4          | NM_178601    | 0.000587826  | 1.34713 | E11.5 * Wnt1 up vs E11.5 * Ctrl |
| 10511803 | 2610029I01Rik | ENSMUST00000 | 0.00301391   | 1.34685 | E11.5 * Wnt1 up vs E11.5 * Ctrl |
| 10590343 | Trak1         | NM_175114    | 0.00195993   | 1.34664 | E11.5 * Wnt1 up vs E11.5 * Ctrl |
| 10433735 | Abcc1         | NM_008576    | 0.000860165  | 1.34573 | E11.5 * Wnt1 up vs E11.5 * Ctrl |
| 10375083 | Stk10         | NM_009288    | 0.00016247   | 1.34559 | E11.5 * Wnt1 up vs E11.5 * Ctrl |
| 10380761 | Socs7         | NM_138657    | 0.000456338  | 1.34558 | E11.5 * Wnt1 up vs E11.5 * Ctrl |
| 10364824 | Csnk1g2       | NM_134002    | 0.00812119   | 1.34554 | E11.5 * Wnt1 up vs E11.5 * Ctrl |
| 10512391 | Vcp           | NM_009503    | 2.89417e-006 | 1.34554 | E11.5 * Wnt1 up vs E11.5 * Ctrl |
| 10519203 | A230069A22Rik | NM_001033394 | 0.00280513   | 1.34518 | E11.5 * Wnt1 up vs E11.5 * Ctrl |
| 10514576 | Kank4         | NM_172872    | 0.00123561   | 1.34491 | E11.5 * Wnt1 up vs E11.5 * Ctrl |
| 10363669 | Dnajc12       | NM_013888    | 0.00140451   | 1.3449  | E11.5 * Wnt1 up vs E11.5 * Ctrl |
| 10464836 | Actn3         | NM_013456    | 5.27909e-005 | 1.34489 | E11.5 * Wnt1 up vs E11.5 * Ctrl |
| 10431113 | Sult4a1       | NM_013873    | 0.00252627   | 1.34476 | E11.5 * Wnt1 up vs E11.5 * Ctrl |

|          |               |              |              |         |                                 |
|----------|---------------|--------------|--------------|---------|---------------------------------|
| 10378649 | Slc43a2       | NM_173388    | 0.00128359   | 1.34469 | E11.5 * Wnt1 up vs E11.5 * Ctrl |
| 10401891 | Ston2         | NM_175367    | 0.000938364  | 1.34468 | E11.5 * Wnt1 up vs E11.5 * Ctrl |
| 10384936 | Acyp2         | NM_029344    | 0.000224825  | 1.34452 | E11.5 * Wnt1 up vs E11.5 * Ctrl |
| 10524621 | Oasl2         | NM_011854    | 0.000268949  | 1.34431 | E11.5 * Wnt1 up vs E11.5 * Ctrl |
| 10525751 | Ddx55         | NM_026409    | 0.000654386  | 1.34425 | E11.5 * Wnt1 up vs E11.5 * Ctrl |
| 10579830 | Rbmxt         | NM_009033    | 5.42091e-006 | 1.34416 | E11.5 * Wnt1 up vs E11.5 * Ctrl |
| 10535184 | Psmg3         | NM_025604    | 0.00246332   | 1.34395 | E11.5 * Wnt1 up vs E11.5 * Ctrl |
| 10376094 | ---           | ---          | 3.72835e-005 | 1.34369 | E11.5 * Wnt1 up vs E11.5 * Ctrl |
| 10507203 | Atpaf1        | NM_181040    | 0.00163059   | 1.34364 | E11.5 * Wnt1 up vs E11.5 * Ctrl |
| 10592099 | Dcps          | NM_027030    | 0.00753012   | 1.34358 | E11.5 * Wnt1 up vs E11.5 * Ctrl |
| 10375038 | Mpg           | NM_010822    | 0.0072851    | 1.34357 | E11.5 * Wnt1 up vs E11.5 * Ctrl |
| 10607317 | Tsr2          | NM_175146    | 0.00314853   | 1.34341 | E11.5 * Wnt1 up vs E11.5 * Ctrl |
| 10364194 | Lss           | NM_146006    | 0.000922339  | 1.34338 | E11.5 * Wnt1 up vs E11.5 * Ctrl |
| 10499045 | Trim2         | NM_030706    | 5.43574e-005 | 1.34323 | E11.5 * Wnt1 up vs E11.5 * Ctrl |
| 10541131 | Dcp1b         | NM_001033379 | 0.00427585   | 1.34315 | E11.5 * Wnt1 up vs E11.5 * Ctrl |
| 10394627 | Nbas          | BC057020     | 6.52055e-006 | 1.34309 | E11.5 * Wnt1 up vs E11.5 * Ctrl |
| 10544199 | Dennd2a       | NM_172477    | 0.0024988    | 1.34295 | E11.5 * Wnt1 up vs E11.5 * Ctrl |
| 10390653 | Med24         | NM_011869    | 1.40521e-005 | 1.34287 | E11.5 * Wnt1 up vs E11.5 * Ctrl |
| 10400805 | Nin           | NM_008697    | 6.43754e-006 | 1.34272 | E11.5 * Wnt1 up vs E11.5 * Ctrl |
| 10386604 | Shmt1         | NM_009171    | 0.00382961   | 1.34248 | E11.5 * Wnt1 up vs E11.5 * Ctrl |
| 10468049 | Poll          | NM_020032    | 0.00109939   | 1.34165 | E11.5 * Wnt1 up vs E11.5 * Ctrl |
| 10448707 | Tbl3          | NM_145396    | 0.000658326  | 1.34138 | E11.5 * Wnt1 up vs E11.5 * Ctrl |
| 10406934 | Etv1          | NM_007960    | 0.000621696  | 1.34117 | E11.5 * Wnt1 up vs E11.5 * Ctrl |
| 10377889 | Mink1         | NM_001045959 | 0.00144242   | 1.34074 | E11.5 * Wnt1 up vs E11.5 * Ctrl |
| 10449018 | Haghl         | NM_026897    | 0.00423646   | 1.34063 | E11.5 * Wnt1 up vs E11.5 * Ctrl |
| 10560315 | Ppp5c         | NM_011155    | 0.00178365   | 1.34051 | E11.5 * Wnt1 up vs E11.5 * Ctrl |
| 10512226 | Wdr40a        | NM_026893    | 0.00115132   | 1.33979 | E11.5 * Wnt1 up vs E11.5 * Ctrl |
| 10516544 | Hpca          | NM_010471    | 0.00414767   | 1.33904 | E11.5 * Wnt1 up vs E11.5 * Ctrl |
| 10417065 | Rap2a         | NM_029519    | 5.56392e-005 | 1.33864 | E11.5 * Wnt1 up vs E11.5 * Ctrl |
| 10545720 | Stambp        | NM_024239    | 0.00083791   | 1.33812 | E11.5 * Wnt1 up vs E11.5 * Ctrl |
| 10358928 | Cacna1e       | NM_009782    | 0.00158694   | 1.33778 | E11.5 * Wnt1 up vs E11.5 * Ctrl |
| 10569569 | Cttn          | NM_007803    | 0.00704198   | 1.33778 | E11.5 * Wnt1 up vs E11.5 * Ctrl |
| 10533386 | Sh2b3         | NM_008507    | 0.000238924  | 1.33725 | E11.5 * Wnt1 up vs E11.5 * Ctrl |
| 10544891 | Nod1          | NM_172729    | 0.000597386  | 1.33711 | E11.5 * Wnt1 up vs E11.5 * Ctrl |
| 10484261 | Cerkl         | NM_001048176 | 0.00305244   | 1.33702 | E11.5 * Wnt1 up vs E11.5 * Ctrl |
| 10484888 | Ptprj         | NM_008982    | 0.0069577    | 1.33696 | E11.5 * Wnt1 up vs E11.5 * Ctrl |
| 10456400 | Tubb6         | NM_026473    | 1.73559e-005 | 1.33695 | E11.5 * Wnt1 up vs E11.5 * Ctrl |
| 10559312 | Dhcr7         | NM_007856    | 0.00290375   | 1.33643 | E11.5 * Wnt1 up vs E11.5 * Ctrl |
| 10507238 | Lrrc41        | NM_153521    | 0.00222346   | 1.33639 | E11.5 * Wnt1 up vs E11.5 * Ctrl |
| 10430593 | Josd1         | NM_028792    | 0.000382991  | 1.33622 | E11.5 * Wnt1 up vs E11.5 * Ctrl |
| 10358672 | Hmcn1         | NM_001024720 | 0.00330153   | 1.33601 | E11.5 * Wnt1 up vs E11.5 * Ctrl |
| 10477644 | Trp53inp2     | NM_178111    | 0.000950403  | 1.33601 | E11.5 * Wnt1 up vs E11.5 * Ctrl |
| 10542522 | Plekha5       | NM_144920    | 0.000198672  | 1.3354  | E11.5 * Wnt1 up vs E11.5 * Ctrl |
| 10544243 | Mrps33        | NM_010270    | 0.000148057  | 1.33535 | E11.5 * Wnt1 up vs E11.5 * Ctrl |
| 10477897 | Dlgap4        | NM_146128    | 2.06724e-008 | 1.33534 | E11.5 * Wnt1 up vs E11.5 * Ctrl |
| 10488303 | Crnk1         | NM_025820    | 0.000517292  | 1.33453 | E11.5 * Wnt1 up vs E11.5 * Ctrl |
| 10407742 | Actn2         | NM_033268    | 5.89629e-005 | 1.33331 | E11.5 * Wnt1 up vs E11.5 * Ctrl |
| 10516974 | Ppp1r8        | NM_146154    | 0.00128876   | 1.33301 | E11.5 * Wnt1 up vs E11.5 * Ctrl |
| 10455656 | Hsd17b4       | NM_008292    | 3.65408e-006 | 1.33299 | E11.5 * Wnt1 up vs E11.5 * Ctrl |
| 10544186 | Mkrn1         | NM_018810    | 8.65072e-005 | 1.33267 | E11.5 * Wnt1 up vs E11.5 * Ctrl |
| 10439936 | Nfkbiz        | NM_030612    | 0.000188724  | 1.33256 | E11.5 * Wnt1 up vs E11.5 * Ctrl |
| 10525766 | Gtf2h3        | NM_181410    | 0.0023215    | 1.332   | E11.5 * Wnt1 up vs E11.5 * Ctrl |
| 10367673 | Plekha1       | NM_001033253 | 0.00700658   | 1.33197 | E11.5 * Wnt1 up vs E11.5 * Ctrl |
| 10433953 | Ypel1         | NM_023249    | 0.000542528  | 1.33195 | E11.5 * Wnt1 up vs E11.5 * Ctrl |
| 10483786 | Mrpl23        | NM_011288    | 0.00571791   | 1.3318  | E11.5 * Wnt1 up vs E11.5 * Ctrl |
| 10597627 | Oxsr1         | NM_133985    | 0.000142326  | 1.33106 | E11.5 * Wnt1 up vs E11.5 * Ctrl |
| 10594551 | Zfp609        | NM_172536    | 0.000340252  | 1.33079 | E11.5 * Wnt1 up vs E11.5 * Ctrl |
| 10455372 | C330007P06Rik | NM_029951    | 0.00225402   | 1.33074 | E11.5 * Wnt1 up vs E11.5 * Ctrl |
| 10415875 | 2610028A01Rik | NM_028228    | 0.00819546   | 1.33071 | E11.5 * Wnt1 up vs E11.5 * Ctrl |
| 10543551 | Rbm28         | NM_133925    | 7.82512e-005 | 1.33048 | E11.5 * Wnt1 up vs E11.5 * Ctrl |
| 10580969 | Got2          | NM_010325    | 0.00122207   | 1.33034 | E11.5 * Wnt1 up vs E11.5 * Ctrl |
| 10468762 | 4930506M07Rik | NM_001114312 | 0.00615352   | 1.33012 | E11.5 * Wnt1 up vs E11.5 * Ctrl |
| 10540168 | Fgd5          | NM_172731    | 0.000111827  | 1.32992 | E11.5 * Wnt1 up vs E11.5 * Ctrl |
| 10493193 | Cct3          | NM_009836    | 0.000226723  | 1.32979 | E11.5 * Wnt1 up vs E11.5 * Ctrl |
| 10533875 | Ncor2         | NM_011424    | 0.00117614   | 1.32966 | E11.5 * Wnt1 up vs E11.5 * Ctrl |
| 10596951 | Arih2         | NM_011790    | 0.0010099    | 1.32962 | E11.5 * Wnt1 up vs E11.5 * Ctrl |

|                        |               |              |         |                                 |
|------------------------|---------------|--------------|---------|---------------------------------|
| 10575184 Wwp2          | NM_025830     | 0.00187393   | 1.3293  | E11.5 * Wnt1 up vs E11.5 * Ctrl |
| 10471247 Aif1l         | NM_145144     | 0.00744673   | 1.329   | E11.5 * Wnt1 up vs E11.5 * Ctrl |
| 10605338 G6pdx         | NM_008062     | 0.00562759   | 1.32891 | E11.5 * Wnt1 up vs E11.5 * Ctrl |
| 10540880 Syn2          | NM_001111015  | 0.00124604   | 1.32845 | E11.5 * Wnt1 up vs E11.5 * Ctrl |
| 10524723 Gcn1l1        | NM_172719     | 0.00471965   | 1.32804 | E11.5 * Wnt1 up vs E11.5 * Ctrl |
| 10480999 Sdccag3       | NM_026563     | 0.000466334  | 1.32735 | E11.5 * Wnt1 up vs E11.5 * Ctrl |
| 10399178 Cdca7l        | NM_146040     | 0.00428813   | 1.32733 | E11.5 * Wnt1 up vs E11.5 * Ctrl |
| 10389010 5730455P16Rik | NM_027472     | 0.00575759   | 1.32729 | E11.5 * Wnt1 up vs E11.5 * Ctrl |
| 10465625 Otub1         | NM_134150     | 0.00149892   | 1.32714 | E11.5 * Wnt1 up vs E11.5 * Ctrl |
| 10433672 Rrn3          | NM_001039521  | 7.06876e-005 | 1.32711 | E11.5 * Wnt1 up vs E11.5 * Ctrl |
| 10554370 Zfp710        | NM_175433     | 0.00639078   | 1.32698 | E11.5 * Wnt1 up vs E11.5 * Ctrl |
| 10536611 Kcnd2         | NM_019697     | 0.00807463   | 1.32588 | E11.5 * Wnt1 up vs E11.5 * Ctrl |
| 10559233 Mrpl23        | NM_011288     | 0.00488707   | 1.32588 | E11.5 * Wnt1 up vs E11.5 * Ctrl |
| 10369295 D10Ertd641e   | NM_025514     | 0.000371196  | 1.32587 | E11.5 * Wnt1 up vs E11.5 * Ctrl |
| 10474073 C230071H18Rik | BC147668      | 0.00189116   | 1.32556 | E11.5 * Wnt1 up vs E11.5 * Ctrl |
| 10468517 Mxi1          | NM_010847     | 0.00491943   | 1.3255  | E11.5 * Wnt1 up vs E11.5 * Ctrl |
| 10369086 Gopc          | NM_053187     | 1.90918e-006 | 1.32529 | E11.5 * Wnt1 up vs E11.5 * Ctrl |
| 10528507 Pus7          | NM_178403     | 0.00036366   | 1.32486 | E11.5 * Wnt1 up vs E11.5 * Ctrl |
| 10350823 Abl2          | NM_001136104  | 0.000392653  | 1.32477 | E11.5 * Wnt1 up vs E11.5 * Ctrl |
| 10391768 Eftud2        | NM_011431     | 0.000991914  | 1.32454 | E11.5 * Wnt1 up vs E11.5 * Ctrl |
| 10487392 Kcnp3         | NM_019789     | 0.00408644   | 1.32441 | E11.5 * Wnt1 up vs E11.5 * Ctrl |
| 10452257 Slc25a23      | NM_025877     | 0.0059641    | 1.3243  | E11.5 * Wnt1 up vs E11.5 * Ctrl |
| 10561854 Tbc1b         | NM_025548     | 0.000590805  | 1.32422 | E11.5 * Wnt1 up vs E11.5 * Ctrl |
| 10485361 B230118H07Rik | NM_026592     | 0.000882296  | 1.32412 | E11.5 * Wnt1 up vs E11.5 * Ctrl |
| 10358754 EG639787      | XR_002131     | 0.00559718   | 1.32401 | E11.5 * Wnt1 up vs E11.5 * Ctrl |
| 10471675 Glo1          | NM_025374     | 0.00488116   | 1.32388 | E11.5 * Wnt1 up vs E11.5 * Ctrl |
| 10389680 Msi2          | NM_054043     | 9.70153e-005 | 1.32369 | E11.5 * Wnt1 up vs E11.5 * Ctrl |
| 10511149 Mrpl20        | NM_025570     | 0.00353918   | 1.32338 | E11.5 * Wnt1 up vs E11.5 * Ctrl |
| 10546855 Srgap3        | NM_080448     | 2.2853e-005  | 1.32331 | E11.5 * Wnt1 up vs E11.5 * Ctrl |
| 10584954 Pcsk7         | NM_008794     | 0.000261804  | 1.3233  | E11.5 * Wnt1 up vs E11.5 * Ctrl |
| 10545910 Pcyox1        | NM_025823     | 0.000341282  | 1.32306 | E11.5 * Wnt1 up vs E11.5 * Ctrl |
| 10402665 Cdc42bpb      | NM_183016     | 0.00255098   | 1.32296 | E11.5 * Wnt1 up vs E11.5 * Ctrl |
| 10383289 Baiap2        | NM_130862     | 0.00183077   | 1.32287 | E11.5 * Wnt1 up vs E11.5 * Ctrl |
| 10578679 ENSMUSG0000C  | ENSMUST000000 | 0.000695949  | 1.32277 | E11.5 * Wnt1 up vs E11.5 * Ctrl |
| 10446470 ENSMUSG0000C  | ENSMUST000000 | 0.00429795   | 1.32275 | E11.5 * Wnt1 up vs E11.5 * Ctrl |
| 10522075 Khlf5         | NM_175174     | 7.65876e-005 | 1.32201 | E11.5 * Wnt1 up vs E11.5 * Ctrl |
| 10512291 Dctn3         | NM_016890     | 0.000142565  | 1.32198 | E11.5 * Wnt1 up vs E11.5 * Ctrl |
| 10523012 Dck           | NM_007832     | 0.00451713   | 1.32187 | E11.5 * Wnt1 up vs E11.5 * Ctrl |
| 10587604 Rwd2a         | NM_027100     | 0.00449208   | 1.32173 | E11.5 * Wnt1 up vs E11.5 * Ctrl |
| 10386230 Rnf187        | AB030190      | 0.0019351    | 1.32162 | E11.5 * Wnt1 up vs E11.5 * Ctrl |
| 10414256 Rbmxt1        | NM_009033     | 1.16271e-005 | 1.32121 | E11.5 * Wnt1 up vs E11.5 * Ctrl |
| 10460573 Eif1ad        | NM_027236     | 0.000337937  | 1.3212  | E11.5 * Wnt1 up vs E11.5 * Ctrl |
| 10421214 Rhobtb2       | NM_153514     | 0.00205144   | 1.32108 | E11.5 * Wnt1 up vs E11.5 * Ctrl |
| 10352396 Trp53bp2      | NM_173378     | 3.06145e-005 | 1.32085 | E11.5 * Wnt1 up vs E11.5 * Ctrl |
| 10363498 Ppa1          | NM_026438     | 1.56535e-005 | 1.32062 | E11.5 * Wnt1 up vs E11.5 * Ctrl |
| 10471505 Sh2d3c        | NM_013781     | 0.00161621   | 1.32052 | E11.5 * Wnt1 up vs E11.5 * Ctrl |
| 10351525 Mpz           | NM_008623     | 0.00171696   | 1.32019 | E11.5 * Wnt1 up vs E11.5 * Ctrl |
| 10593130 Sidt2         | NM_172257     | 0.000521546  | 1.32007 | E11.5 * Wnt1 up vs E11.5 * Ctrl |
| 10473880 Lrp4          | NM_172668     | 0.00126578   | 1.31971 | E11.5 * Wnt1 up vs E11.5 * Ctrl |
| 10564220 Gkap1         | NM_019832     | 0.00727726   | 1.31949 | E11.5 * Wnt1 up vs E11.5 * Ctrl |
| 10399636 Mrto4         | NM_023536     | 0.000469138  | 1.31943 | E11.5 * Wnt1 up vs E11.5 * Ctrl |
| 10435162 Lrch3         | NM_001081255  | 9.52305e-005 | 1.31937 | E11.5 * Wnt1 up vs E11.5 * Ctrl |
| 10375065 Sh3pxd2b      | NM_177364     | 0.000143558  | 1.3191  | E11.5 * Wnt1 up vs E11.5 * Ctrl |
| 10559406 Tfpt          | NM_023524     | 0.00844021   | 1.3191  | E11.5 * Wnt1 up vs E11.5 * Ctrl |
| 10506643 Tmem59        | NM_029565     | 0.000149507  | 1.31904 | E11.5 * Wnt1 up vs E11.5 * Ctrl |
| 10602401 Fgd1          | NM_008001     | 0.00134555   | 1.31901 | E11.5 * Wnt1 up vs E11.5 * Ctrl |
| 10592790 Hinfp         | NM_172162     | 0.00205131   | 1.31898 | E11.5 * Wnt1 up vs E11.5 * Ctrl |
| 10522250 Tmem33        | NM_028975     | 0.00034208   | 1.31874 | E11.5 * Wnt1 up vs E11.5 * Ctrl |
| 10354233 Tgfb1         | NM_001013025  | 0.00296313   | 1.31864 | E11.5 * Wnt1 up vs E11.5 * Ctrl |
| 10462113 Apba1         | NM_177034     | 0.00532018   | 1.31831 | E11.5 * Wnt1 up vs E11.5 * Ctrl |
| 10563303 Bax           | NM_007527     | 0.00248124   | 1.31822 | E11.5 * Wnt1 up vs E11.5 * Ctrl |
| 10402715 Bag5          | NM_027404     | 0.000254373  | 1.31811 | E11.5 * Wnt1 up vs E11.5 * Ctrl |
| 10537712 Gstk1         | NM_029555     | 0.0043518    | 1.31809 | E11.5 * Wnt1 up vs E11.5 * Ctrl |
| 10353899 Sema4c        | NM_001126047  | 0.00346942   | 1.31809 | E11.5 * Wnt1 up vs E11.5 * Ctrl |
| 10402650 2810452K22Rik | NM_026048     | 0.000842191  | 1.31792 | E11.5 * Wnt1 up vs E11.5 * Ctrl |
| 10505894 Mtap          | NM_024433     | 0.000238859  | 1.31762 | E11.5 * Wnt1 up vs E11.5 * Ctrl |

|          |               |              |              |         |                                 |
|----------|---------------|--------------|--------------|---------|---------------------------------|
| 10553993 | Snrpa1        | NM_021336    | 1.14049e-005 | 1.31747 | E11.5 * Wnt1 up vs E11.5 * Ctrl |
| 10399430 | Ddx1          | NM_134040    | 2.72074e-006 | 1.3173  | E11.5 * Wnt1 up vs E11.5 * Ctrl |
| 10510464 | Lzic          | NM_026963    | 0.000447788  | 1.31693 | E11.5 * Wnt1 up vs E11.5 * Ctrl |
| 10510270 | Mthfr         | NM_010840    | 1.65914e-005 | 1.31662 | E11.5 * Wnt1 up vs E11.5 * Ctrl |
| 10450579 | Ddr1          | NM_007584    | 0.00754415   | 1.31629 | E11.5 * Wnt1 up vs E11.5 * Ctrl |
| 10474411 | Lin7c         | NM_011699    | 1.07223e-007 | 1.31628 | E11.5 * Wnt1 up vs E11.5 * Ctrl |
| 10461844 | Gnaq          | NM_008139    | 0.000615467  | 1.31608 | E11.5 * Wnt1 up vs E11.5 * Ctrl |
| 10590445 | Snrk          | NM_133741    | 0.000889545  | 1.31602 | E11.5 * Wnt1 up vs E11.5 * Ctrl |
| 10365601 | Gnptab        | NM_001004164 | 0.000408071  | 1.31599 | E11.5 * Wnt1 up vs E11.5 * Ctrl |
| 10457844 | Zfp191        | NM_021559    | 9.85048e-006 | 1.31578 | E11.5 * Wnt1 up vs E11.5 * Ctrl |
| 10454851 | Cxxc5         | NM_133687    | 0.00164821   | 1.3157  | E11.5 * Wnt1 up vs E11.5 * Ctrl |
| 10557432 | G730046D07Rik | AK144875     | 0.000434789  | 1.31567 | E11.5 * Wnt1 up vs E11.5 * Ctrl |
| 10531899 | Klhl8         | NM_178741    | 0.00121494   | 1.31562 | E11.5 * Wnt1 up vs E11.5 * Ctrl |
| 10578149 | Leprotl1      | NM_026609    | 5.88828e-006 | 1.31538 | E11.5 * Wnt1 up vs E11.5 * Ctrl |
| 10442816 | Lmf1          | NM_029624    | 0.000945811  | 1.3153  | E11.5 * Wnt1 up vs E11.5 * Ctrl |
| 10357579 | Mapkapk2      | NM_008551    | 0.00778428   | 1.31501 | E11.5 * Wnt1 up vs E11.5 * Ctrl |
| 10376959 | Elac2         | NM_023479    | 0.000876547  | 1.3147  | E11.5 * Wnt1 up vs E11.5 * Ctrl |
| 10454564 | Ercc3         | NM_133658    | 0.000134182  | 1.31455 | E11.5 * Wnt1 up vs E11.5 * Ctrl |
| 10551760 | Zfp84         | NM_023750    | 0.000384808  | 1.31447 | E11.5 * Wnt1 up vs E11.5 * Ctrl |
| 10563829 | Mrps33        | NM_010270    | 0.000161401  | 1.31445 | E11.5 * Wnt1 up vs E11.5 * Ctrl |
| 10530806 | Ppat          | BC023841     | 8.86828e-006 | 1.31442 | E11.5 * Wnt1 up vs E11.5 * Ctrl |
| 10598638 | Mid1ip1       | NM_026524    | 6.20598e-005 | 1.31406 | E11.5 * Wnt1 up vs E11.5 * Ctrl |
| 10466304 | Dtx4          | NM_172442    | 0.000358445  | 1.31394 | E11.5 * Wnt1 up vs E11.5 * Ctrl |
| 10589041 | Impdh2        | NM_011830    | 0.000347157  | 1.3138  | E11.5 * Wnt1 up vs E11.5 * Ctrl |
| 10510809 | A430005L14Rik | BC052148     | 0.00469419   | 1.31332 | E11.5 * Wnt1 up vs E11.5 * Ctrl |
| 10500412 | Gpr89         | NM_026229    | 0.000104167  | 1.31317 | E11.5 * Wnt1 up vs E11.5 * Ctrl |
| 10476314 | Prnp          | NM_011170    | 0.000300037  | 1.31239 | E11.5 * Wnt1 up vs E11.5 * Ctrl |
| 10465342 | Tm7sf2        | NM_028454    | 0.00203248   | 1.31215 | E11.5 * Wnt1 up vs E11.5 * Ctrl |
| 10522661 | C530008M17Rik | AK122469     | 0.00296571   | 1.31196 | E11.5 * Wnt1 up vs E11.5 * Ctrl |
| 10431874 | Slc38a1       | NM_134086    | 0.000146143  | 1.3117  | E11.5 * Wnt1 up vs E11.5 * Ctrl |
| 10364559 | Arid3a        | NM_007880    | 0.0038646    | 1.31142 | E11.5 * Wnt1 up vs E11.5 * Ctrl |
| 10373036 | Os9           | NM_177614    | 0.00420082   | 1.31138 | E11.5 * Wnt1 up vs E11.5 * Ctrl |
| 10598493 | Pcsk1n        | NM_013892    | 0.000915362  | 1.31114 | E11.5 * Wnt1 up vs E11.5 * Ctrl |
| 10463448 | Peo1          | NM_153796    | 0.00635841   | 1.31114 | E11.5 * Wnt1 up vs E11.5 * Ctrl |
| 10481577 | Uck1          | NM_011675    | 0.00177679   | 1.31107 | E11.5 * Wnt1 up vs E11.5 * Ctrl |
| 10432256 | Arf3          | NM_007478    | 0.000877544  | 1.31089 | E11.5 * Wnt1 up vs E11.5 * Ctrl |
| 10434467 | Psmd2         | NR_027485    | 0.000905541  | 1.3108  | E11.5 * Wnt1 up vs E11.5 * Ctrl |
| 10579860 | Smad1         | NM_008539    | 5.28424e-005 | 1.31058 | E11.5 * Wnt1 up vs E11.5 * Ctrl |
| 10581940 | Kars          | NM_001130868 | 0.0003297    | 1.31022 | E11.5 * Wnt1 up vs E11.5 * Ctrl |
| 10360349 | Cadm3         | NM_053199    | 0.00441589   | 1.30973 | E11.5 * Wnt1 up vs E11.5 * Ctrl |
| 10585417 | Idh3a         | NM_029573    | 0.00505809   | 1.30946 | E11.5 * Wnt1 up vs E11.5 * Ctrl |
| 10586347 | Parp16        | NM_177460    | 0.00209993   | 1.30946 | E11.5 * Wnt1 up vs E11.5 * Ctrl |
| 10540391 | Trnt1         | NM_027296    | 0.00344667   | 1.30944 | E11.5 * Wnt1 up vs E11.5 * Ctrl |
| 10417787 | Gng2          | NM_010315    | 0.000145266  | 1.30922 | E11.5 * Wnt1 up vs E11.5 * Ctrl |
| 10473737 | Mtch2         | NM_019758    | 0.000255047  | 1.30914 | E11.5 * Wnt1 up vs E11.5 * Ctrl |
| 10382802 | Sphk1         | NM_011451    | 0.00129122   | 1.30872 | E11.5 * Wnt1 up vs E11.5 * Ctrl |
| 10500685 | Atp1a1        | NM_144900    | 0.000271005  | 1.30849 | E11.5 * Wnt1 up vs E11.5 * Ctrl |
| 10606835 | Bex2          | NM_009749    | 0.00607926   | 1.30842 | E11.5 * Wnt1 up vs E11.5 * Ctrl |
| 10471062 | Mettl11a      | NM_170592    | 0.00373548   | 1.30789 | E11.5 * Wnt1 up vs E11.5 * Ctrl |
| 10501402 | Gpsm2         | NM_029522    | 0.00279107   | 1.30776 | E11.5 * Wnt1 up vs E11.5 * Ctrl |
| 10478424 | Ywhab         | NM_018753    | 9.46588e-007 | 1.30757 | E11.5 * Wnt1 up vs E11.5 * Ctrl |
| 10505109 | BC026590      | BC026590     | 0.00167948   | 1.3074  | E11.5 * Wnt1 up vs E11.5 * Ctrl |
| 10374364 | Akt2          | NM_001110208 | 0.00352581   | 1.3074  | E11.5 * Wnt1 up vs E11.5 * Ctrl |
| 10392098 | Ftsj3         | NM_025310    | 0.000262127  | 1.30696 | E11.5 * Wnt1 up vs E11.5 * Ctrl |
| 10381345 | Psme3         | NM_011192    | 0.00054032   | 1.3069  | E11.5 * Wnt1 up vs E11.5 * Ctrl |
| 10481621 | 1110008P14Rik | NM_198001    | 0.00089615   | 1.30671 | E11.5 * Wnt1 up vs E11.5 * Ctrl |
| 10516652 | Iqcc          | NM_198026    | 0.0069566    | 1.30656 | E11.5 * Wnt1 up vs E11.5 * Ctrl |
| 10511139 | Ssu72         | NM_026899    | 0.00061262   | 1.30622 | E11.5 * Wnt1 up vs E11.5 * Ctrl |
| 10345423 | Plekhhb2      | NM_145516    | 0.00134519   | 1.30596 | E11.5 * Wnt1 up vs E11.5 * Ctrl |
| 10530319 | Atp8a1        | NM_001038999 | 1.14652e-005 | 1.30573 | E11.5 * Wnt1 up vs E11.5 * Ctrl |
| 10384192 | Tbrg4         | NM_134011    | 2.79475e-005 | 1.3056  | E11.5 * Wnt1 up vs E11.5 * Ctrl |
| 10578922 | Klhl2         | NM_178633    | 0.00315602   | 1.30544 | E11.5 * Wnt1 up vs E11.5 * Ctrl |
| 10543080 | Rnps1         | NM_009070    | 0.00204496   | 1.30496 | E11.5 * Wnt1 up vs E11.5 * Ctrl |
| 10350848 | 2810025M15Rik | BC055845     | 0.000468595  | 1.30488 | E11.5 * Wnt1 up vs E11.5 * Ctrl |
| 10345025 | Iars          | NM_172015    | 0.00421237   | 1.30488 | E11.5 * Wnt1 up vs E11.5 * Ctrl |
| 10358379 | Trove2        | NM_013835    | 0.00354318   | 1.30482 | E11.5 * Wnt1 up vs E11.5 * Ctrl |

|                        |              |              |         |                                 |
|------------------------|--------------|--------------|---------|---------------------------------|
| 10434252 Hira          | NM_010435    | 0.000645717  | 1.30452 | E11.5 * Wnt1 up vs E11.5 * Ctrl |
| 10442435 Rnps1         | NM_009070    | 0.00140789   | 1.30425 | E11.5 * Wnt1 up vs E11.5 * Ctrl |
| 10437040 Chaf1b        | NM_028083    | 0.00193019   | 1.30412 | E11.5 * Wnt1 up vs E11.5 * Ctrl |
| 10496417 Rg9mtd2       | NM_175389    | 0.00391923   | 1.30385 | E11.5 * Wnt1 up vs E11.5 * Ctrl |
| 10500295 Plekho1       | NM_023320    | 0.000428316  | 1.3036  | E11.5 * Wnt1 up vs E11.5 * Ctrl |
| 10362904 Rtn4ip1       | NM_130892    | 0.00332613   | 1.3035  | E11.5 * Wnt1 up vs E11.5 * Ctrl |
| 10460626 Rnaseh2c      | NM_026616    | 0.00300855   | 1.30307 | E11.5 * Wnt1 up vs E11.5 * Ctrl |
| 10482109 Rbm18         | NR_027515    | 0.000328383  | 1.30278 | E11.5 * Wnt1 up vs E11.5 * Ctrl |
| 10520096 Klhl7         | NM_026448    | 0.00252666   | 1.3027  | E11.5 * Wnt1 up vs E11.5 * Ctrl |
| 10438098 Sdf2l1        | NM_022324    | 0.00153566   | 1.30253 | E11.5 * Wnt1 up vs E11.5 * Ctrl |
| 10400157 Nova1         | ENSMUST00000 | 0.00210575   | 1.30237 | E11.5 * Wnt1 up vs E11.5 * Ctrl |
| 10373577 Ormdl2        | NM_024180    | 0.00356115   | 1.30208 | E11.5 * Wnt1 up vs E11.5 * Ctrl |
| 10435802 2610015P09Rik | ENSMUST00000 | 0.00746921   | 1.30205 | E11.5 * Wnt1 up vs E11.5 * Ctrl |
| 10589438 Mtap4         | NM_008633    | 0.000138326  | 1.3018  | E11.5 * Wnt1 up vs E11.5 * Ctrl |
| 10562578 Pop4          | NM_025390    | 0.00281091   | 1.30177 | E11.5 * Wnt1 up vs E11.5 * Ctrl |
| 10418300 Cacna2d3      | NM_009785    | 0.00514107   | 1.30173 | E11.5 * Wnt1 up vs E11.5 * Ctrl |
| 10404578 Cdy1          | NM_009881    | 0.000221604  | 1.30172 | E11.5 * Wnt1 up vs E11.5 * Ctrl |
| 10569203 Chid1         | NM_001142681 | 0.00140483   | 1.30165 | E11.5 * Wnt1 up vs E11.5 * Ctrl |
| 10434029 Lztr1         | NM_025808    | 0.000783345  | 1.30161 | E11.5 * Wnt1 up vs E11.5 * Ctrl |
| 10376482 2310033P09Rik | BC002181     | 7.80796e-005 | 1.3014  | E11.5 * Wnt1 up vs E11.5 * Ctrl |
| 10417813 Ecd           | NM_027475    | 2.5182e-005  | 1.30103 | E11.5 * Wnt1 up vs E11.5 * Ctrl |
| 10391918 Plekhh1       | NM_183034    | 0.0069907    | 1.30096 | E11.5 * Wnt1 up vs E11.5 * Ctrl |
| 10391577 Hdac5         | NM_001077696 | 0.00210674   | 1.30068 | E11.5 * Wnt1 up vs E11.5 * Ctrl |
| 10346810 Pard3b        | NM_001081050 | 0.00218068   | 1.30053 | E11.5 * Wnt1 up vs E11.5 * Ctrl |
| 10515007 Gpx7          | NM_024198    | 0.00374567   | 1.30045 | E11.5 * Wnt1 up vs E11.5 * Ctrl |
| 10402096 Ttc7b         | NM_001033213 | 0.000309333  | 1.30038 | E11.5 * Wnt1 up vs E11.5 * Ctrl |
| 10457585 ---           |              | 0.00861153   | 1.30007 | E11.5 * Wnt1 up vs E11.5 * Ctrl |
| 10475630 Galk2         | NM_175154    | 0.00302796   | 1.29982 | E11.5 * Wnt1 up vs E11.5 * Ctrl |
| 10574033 Nup93         | NM_172410    | 1.67448e-007 | 1.29956 | E11.5 * Wnt1 up vs E11.5 * Ctrl |
| 10426479 Ano6          | NM_175344    | 0.000726668  | 1.2994  | E11.5 * Wnt1 up vs E11.5 * Ctrl |
| 10586130 2310007F21Rik | BC027311     | 0.00339001   | 1.29937 | E11.5 * Wnt1 up vs E11.5 * Ctrl |
| 10416256 Bin3          | NM_021328    | 0.00864002   | 1.29934 | E11.5 * Wnt1 up vs E11.5 * Ctrl |
| 10558921 Pnpla2        | NM_025802    | 0.00206169   | 1.29918 | E11.5 * Wnt1 up vs E11.5 * Ctrl |
| 10578810 Clcn3         | NM_173874    | 0.000265919  | 1.29882 | E11.5 * Wnt1 up vs E11.5 * Ctrl |
| 10529273 Ctbp1         | NM_013502    | 0.00365171   | 1.29846 | E11.5 * Wnt1 up vs E11.5 * Ctrl |
| 10515295 Mast2         | NM_001042743 | 4.62853e-005 | 1.29831 | E11.5 * Wnt1 up vs E11.5 * Ctrl |
| 10568099 Tmem219       | NM_026827    | 0.00139017   | 1.29821 | E11.5 * Wnt1 up vs E11.5 * Ctrl |
| 10378768 Rnmtl1        | NM_183263    | 0.00153263   | 1.29809 | E11.5 * Wnt1 up vs E11.5 * Ctrl |
| 10459241 Afap111       | NM_178928    | 0.00188434   | 1.29808 | E11.5 * Wnt1 up vs E11.5 * Ctrl |
| 10548585 Csda          | NM_139117    | 0.00203315   | 1.29779 | E11.5 * Wnt1 up vs E11.5 * Ctrl |
| 10469581 Et14          | NM_001081006 | 9.90031e-005 | 1.29766 | E11.5 * Wnt1 up vs E11.5 * Ctrl |
| 10465246 Frmd8         | NM_026169    | 0.0061976    | 1.29764 | E11.5 * Wnt1 up vs E11.5 * Ctrl |
| 10576010 Gse1          | NM_198671    | 0.00829653   | 1.29763 | E11.5 * Wnt1 up vs E11.5 * Ctrl |
| 10581625 2400003C14Rik | BC039052     | 0.00226958   | 1.29706 | E11.5 * Wnt1 up vs E11.5 * Ctrl |
| 10435676 Gsk3b         | NM_019827    | 2.5672e-005  | 1.29698 | E11.5 * Wnt1 up vs E11.5 * Ctrl |
| 10493108 Crabp2        | NM_007759    | 0.0015566    | 1.29675 | E11.5 * Wnt1 up vs E11.5 * Ctrl |
| 10508412 Fndc5         | NM_027402    | 0.00413644   | 1.29654 | E11.5 * Wnt1 up vs E11.5 * Ctrl |
| 10477725 Mmp24         | NM_010808    | 0.000748136  | 1.29627 | E11.5 * Wnt1 up vs E11.5 * Ctrl |
| 10526726 Zkscan1       | NM_133906    | 9.98534e-005 | 1.29624 | E11.5 * Wnt1 up vs E11.5 * Ctrl |
| 10504703 AU014645      | NM_001033201 | 0.000148849  | 1.29618 | E11.5 * Wnt1 up vs E11.5 * Ctrl |
| 10366026 Wdr51b        | NM_027740    | 0.00861883   | 1.29612 | E11.5 * Wnt1 up vs E11.5 * Ctrl |
| 10498064 Setd7         | NM_080793    | 0.000588121  | 1.2961  | E11.5 * Wnt1 up vs E11.5 * Ctrl |
| 10373313 Nab2          | NM_008668    | 0.00826555   | 1.29588 | E11.5 * Wnt1 up vs E11.5 * Ctrl |
| 10446074 Uhrf1         | NM_010931    | 0.00344687   | 1.29585 | E11.5 * Wnt1 up vs E11.5 * Ctrl |
| 10391431 Aarsd1        | NM_144829    | 0.00351759   | 1.29578 | E11.5 * Wnt1 up vs E11.5 * Ctrl |
| 10507529 Med8          | NM_020000    | 0.00165519   | 1.29568 | E11.5 * Wnt1 up vs E11.5 * Ctrl |
| 10510861 Megf6         | ENSMUST00000 | 0.00576814   | 1.29557 | E11.5 * Wnt1 up vs E11.5 * Ctrl |
| 10384691 0610010F05Rik | NM_027860    | 0.000814761  | 1.29551 | E11.5 * Wnt1 up vs E11.5 * Ctrl |
| 10604057 06-Sep        | NM_019942    | 0.00568504   | 1.29542 | E11.5 * Wnt1 up vs E11.5 * Ctrl |
| 10405001 Bicd2         | NM_001039179 | 0.00250527   | 1.2954  | E11.5 * Wnt1 up vs E11.5 * Ctrl |
| 10583242 Sesn3         | NM_030261    | 0.00200224   | 1.29526 | E11.5 * Wnt1 up vs E11.5 * Ctrl |
| 10517706 Mrto4         | NM_023536    | 0.000196861  | 1.29521 | E11.5 * Wnt1 up vs E11.5 * Ctrl |
| 10509463 Eif4g3        | NM_172703    | 2.55791e-005 | 1.29475 | E11.5 * Wnt1 up vs E11.5 * Ctrl |
| 10527233 Cyth3         | NM_011182    | 0.000160147  | 1.2945  | E11.5 * Wnt1 up vs E11.5 * Ctrl |
| 10370471 Agpat3        | NM_053014    | 0.000123633  | 1.2942  | E11.5 * Wnt1 up vs E11.5 * Ctrl |
| 10592593 Tecta         | NM_009347    | 0.00721012   | 1.2941  | E11.5 * Wnt1 up vs E11.5 * Ctrl |

|          |               |              |              |         |                                 |
|----------|---------------|--------------|--------------|---------|---------------------------------|
| 10573401 | Trmt1         | NM_198020    | 0.000578863  | 1.29364 | E11.5 * Wnt1 up vs E11.5 * Ctrl |
| 10364518 | Ptbp1         | NM_001077363 | 0.00403914   | 1.29345 | E11.5 * Wnt1 up vs E11.5 * Ctrl |
| 10465844 | Asrgl1        | NM_025610    | 0.000112965  | 1.29329 | E11.5 * Wnt1 up vs E11.5 * Ctrl |
| 10575763 | Gan           | NM_001081151 | 0.000444503  | 1.29315 | E11.5 * Wnt1 up vs E11.5 * Ctrl |
| 10592084 | St3gal4       | NM_009178    | 0.00300985   | 1.293   | E11.5 * Wnt1 up vs E11.5 * Ctrl |
| 10496789 | Lpar3         | NM_022983    | 0.000848141  | 1.2928  | E11.5 * Wnt1 up vs E11.5 * Ctrl |
| 10396919 | 4933426M11Rik | BC040401     | 0.000117185  | 1.29279 | E11.5 * Wnt1 up vs E11.5 * Ctrl |
| 10456723 | BC031181      | BC016084     | 0.00342094   | 1.2927  | E11.5 * Wnt1 up vs E11.5 * Ctrl |
| 10591967 | Jam3          | NM_023277    | 0.00119423   | 1.29256 | E11.5 * Wnt1 up vs E11.5 * Ctrl |
| 10553280 | Gtf2h1        | NM_008186    | 0.000695246  | 1.29227 | E11.5 * Wnt1 up vs E11.5 * Ctrl |
| 10561356 | Psmc4         | NM_011874    | 0.00055647   | 1.29219 | E11.5 * Wnt1 up vs E11.5 * Ctrl |
| 10526193 | ---           | ---          | 0.00186647   | 1.29201 | E11.5 * Wnt1 up vs E11.5 * Ctrl |
| 10357242 | Dbi           | NM_001037999 | 0.00280472   | 1.29183 | E11.5 * Wnt1 up vs E11.5 * Ctrl |
| 10445909 | Kat2b         | NM_020005    | 0.00101084   | 1.29171 | E11.5 * Wnt1 up vs E11.5 * Ctrl |
| 10395142 | Sh3yl1        | NM_013709    | 0.000864428  | 1.29094 | E11.5 * Wnt1 up vs E11.5 * Ctrl |
| 10393408 | Tmc6          | NM_145439    | 0.000493346  | 1.29082 | E11.5 * Wnt1 up vs E11.5 * Ctrl |
| 10548176 | 5930416L19Rik | NR_027360    | 0.00156045   | 1.29079 | E11.5 * Wnt1 up vs E11.5 * Ctrl |
| 10476582 | MacroD2       | NM_028387    | 3.79844e-005 | 1.29066 | E11.5 * Wnt1 up vs E11.5 * Ctrl |
| 10424624 | Bai1          | NM_174991    | 0.00130722   | 1.29033 | E11.5 * Wnt1 up vs E11.5 * Ctrl |
| 10370914 | Fam108a       | BC005632     | 0.0053119    | 1.2902  | E11.5 * Wnt1 up vs E11.5 * Ctrl |
| 10383395 | Slc25a10      | NM_013770    | 0.00159257   | 1.29009 | E11.5 * Wnt1 up vs E11.5 * Ctrl |
| 10391301 | Stat3         | NM_213659    | 0.0022437    | 1.29007 | E11.5 * Wnt1 up vs E11.5 * Ctrl |
| 10575961 | Usp10         | NM_009462    | 0.00278794   | 1.28985 | E11.5 * Wnt1 up vs E11.5 * Ctrl |
| 10375973 | Taf13         | NM_025444    | 0.00231602   | 1.28975 | E11.5 * Wnt1 up vs E11.5 * Ctrl |
| 10597309 | Stac          | NM_016853    | 0.00842328   | 1.28907 | E11.5 * Wnt1 up vs E11.5 * Ctrl |
| 10579554 | Unc13a        | NM_001029873 | 0.00314948   | 1.2889  | E11.5 * Wnt1 up vs E11.5 * Ctrl |
| 10442651 | Ift140        | NM_134126    | 0.000572013  | 1.28887 | E11.5 * Wnt1 up vs E11.5 * Ctrl |
| 10420320 | Cenpj         | NM_001014996 | 0.00319789   | 1.28883 | E11.5 * Wnt1 up vs E11.5 * Ctrl |
| 10475264 | Ccndbp1       | NM_010761    | 0.00551644   | 1.28866 | E11.5 * Wnt1 up vs E11.5 * Ctrl |
| 10504424 | Reck          | NM_016678    | 1.65413e-005 | 1.28864 | E11.5 * Wnt1 up vs E11.5 * Ctrl |
| 10539882 | Ruvbl1        | NM_019685    | 0.000167317  | 1.28854 | E11.5 * Wnt1 up vs E11.5 * Ctrl |
| 10474870 | Rpusd2        | NM_173450    | 0.000275314  | 1.28838 | E11.5 * Wnt1 up vs E11.5 * Ctrl |
| 10534021 | Rimbp2        | NM_001081388 | 1.40615e-005 | 1.28827 | E11.5 * Wnt1 up vs E11.5 * Ctrl |
| 10504884 | 5730528L13Rik | NM_001145924 | 0.00297706   | 1.28787 | E11.5 * Wnt1 up vs E11.5 * Ctrl |
| 10497379 | ENSMUSG00000  | ENSMUST00000 | 0.00237831   | 1.28778 | E11.5 * Wnt1 up vs E11.5 * Ctrl |
| 10524105 | Chfr          | NM_172717    | 0.000334949  | 1.28774 | E11.5 * Wnt1 up vs E11.5 * Ctrl |
| 10363392 | Dnajb12       | NM_019965    | 0.00285855   | 1.28755 | E11.5 * Wnt1 up vs E11.5 * Ctrl |
| 10456140 | Sh3tc2        | NM_172628    | 0.00780743   | 1.28748 | E11.5 * Wnt1 up vs E11.5 * Ctrl |
| 10546349 | Xpc           | NM_009531    | 4.94917e-006 | 1.28738 | E11.5 * Wnt1 up vs E11.5 * Ctrl |
| 10535739 | Usp12         | NM_011669    | 0.00508533   | 1.28704 | E11.5 * Wnt1 up vs E11.5 * Ctrl |
| 10402142 | Ccdc88c       | NM_026681    | 0.00377805   | 1.28676 | E11.5 * Wnt1 up vs E11.5 * Ctrl |
| 10582712 | Egln1         | NM_053207    | 2.85802e-005 | 1.28674 | E11.5 * Wnt1 up vs E11.5 * Ctrl |
| 10500054 | Psmd4         | NM_008951    | 0.0035607    | 1.28665 | E11.5 * Wnt1 up vs E11.5 * Ctrl |
| 10391221 | Kat2a         | NM_001038010 | 0.00879654   | 1.2866  | E11.5 * Wnt1 up vs E11.5 * Ctrl |
| 10460631 | Rela          | NM_009045    | 0.00297994   | 1.28627 | E11.5 * Wnt1 up vs E11.5 * Ctrl |
| 10409575 | Neurog1       | NM_010896    | 0.000436372  | 1.2859  | E11.5 * Wnt1 up vs E11.5 * Ctrl |
| 10373950 | Nipsnap1      | NM_008698    | 0.000490297  | 1.28579 | E11.5 * Wnt1 up vs E11.5 * Ctrl |
| 10417053 | Mbnl2         | NM_175341    | 0.000126301  | 1.28569 | E11.5 * Wnt1 up vs E11.5 * Ctrl |
| 10436446 | Gps1          | NM_145370    | 0.00382208   | 1.28551 | E11.5 * Wnt1 up vs E11.5 * Ctrl |
| 10390574 | Fbxl20        | NM_028149    | 0.00152686   | 1.28549 | E11.5 * Wnt1 up vs E11.5 * Ctrl |
| 10446594 | ---           | ---          | 0.00784569   | 1.28539 | E11.5 * Wnt1 up vs E11.5 * Ctrl |
| 10501649 | Rtcd1         | NM_025517    | 3.33721e-006 | 1.28462 | E11.5 * Wnt1 up vs E11.5 * Ctrl |
| 10575102 | Cirh1a        | NM_011574    | 0.00171774   | 1.2845  | E11.5 * Wnt1 up vs E11.5 * Ctrl |
| 10381419 | Nbr1          | NM_008676    | 0.00358284   | 1.28441 | E11.5 * Wnt1 up vs E11.5 * Ctrl |
| 10598422 | Gripap1       | NM_207670    | 0.00087107   | 1.28435 | E11.5 * Wnt1 up vs E11.5 * Ctrl |
| 10597531 | Rbms3         | NM_178660    | 4.42669e-005 | 1.28434 | E11.5 * Wnt1 up vs E11.5 * Ctrl |
| 10425226 | Eif3l         | NM_145139    | 1.65732e-005 | 1.2843  | E11.5 * Wnt1 up vs E11.5 * Ctrl |
| 10373873 | Sf3a1         | NM_026175    | 0.00385965   | 1.28424 | E11.5 * Wnt1 up vs E11.5 * Ctrl |
| 10434925 | Hes1          | NM_008235    | 0.000314828  | 1.28413 | E11.5 * Wnt1 up vs E11.5 * Ctrl |
| 10446334 | Glicc1        | NM_133236    | 0.00864427   | 1.28402 | E11.5 * Wnt1 up vs E11.5 * Ctrl |
| 10571048 | Lsm1          | NM_026032    | 0.00585535   | 1.28377 | E11.5 * Wnt1 up vs E11.5 * Ctrl |
| 10380660 | Hoxb2         | NM_134032    | 0.00337545   | 1.28364 | E11.5 * Wnt1 up vs E11.5 * Ctrl |
| 10575578 | 4930402E16Rik | NM_198308    | 0.00379679   | 1.28363 | E11.5 * Wnt1 up vs E11.5 * Ctrl |
| 10447431 | Foxn2         | NM_180974    | 2.6016e-005  | 1.28357 | E11.5 * Wnt1 up vs E11.5 * Ctrl |
| 10558707 | Ric8          | NM_053194    | 0.00420112   | 1.28328 | E11.5 * Wnt1 up vs E11.5 * Ctrl |
| 10406898 | Taf9          | NM_027592    | 0.00080861   | 1.2832  | E11.5 * Wnt1 up vs E11.5 * Ctrl |

|          |               |               |              |         |                                 |
|----------|---------------|---------------|--------------|---------|---------------------------------|
| 10495539 | Extl2         | NM_021388     | 0.00714242   | 1.28307 | E11.5 * Wnt1 up vs E11.5 * Ctrl |
| 10364455 | Cdc34         | NM_177613     | 0.00785763   | 1.28306 | E11.5 * Wnt1 up vs E11.5 * Ctrl |
| 10420730 | Fdft1         | NM_010191     | 0.0011425    | 1.28297 | E11.5 * Wnt1 up vs E11.5 * Ctrl |
| 10579703 | Cherp         | NM_138585     | 0.0077524    | 1.28283 | E11.5 * Wnt1 up vs E11.5 * Ctrl |
| 10415844 | Ctsb          | NM_007798     | 0.00414205   | 1.28256 | E11.5 * Wnt1 up vs E11.5 * Ctrl |
| 10403076 | ---           | ---           | 0.00188486   | 1.28245 | E11.5 * Wnt1 up vs E11.5 * Ctrl |
| 10388492 | Vps53         | NM_026664     | 2.77138e-005 | 1.28233 | E11.5 * Wnt1 up vs E11.5 * Ctrl |
| 10420035 | Ipo4          | NM_024267     | 0.00196698   | 1.28232 | E11.5 * Wnt1 up vs E11.5 * Ctrl |
| 10420385 | N6amt2        | NM_026526     | 0.00348782   | 1.28223 | E11.5 * Wnt1 up vs E11.5 * Ctrl |
| 10437499 | 3930401K13Rik | NM_001079814  | 0.00265404   | 1.28216 | E11.5 * Wnt1 up vs E11.5 * Ctrl |
| 10539342 | Rtkn          | NM_133641     | 0.00198184   | 1.28207 | E11.5 * Wnt1 up vs E11.5 * Ctrl |
| 10579356 | Pik3r2        | NM_008841     | 0.00851935   | 1.28172 | E11.5 * Wnt1 up vs E11.5 * Ctrl |
| 10509858 | Sdhb          | NM_023374     | 0.00590317   | 1.2817  | E11.5 * Wnt1 up vs E11.5 * Ctrl |
| 10561351 | ---           | ---           | 0.00457091   | 1.28168 | E11.5 * Wnt1 up vs E11.5 * Ctrl |
| 10459730 | Me2           | NM_145494     | 0.00105154   | 1.28146 | E11.5 * Wnt1 up vs E11.5 * Ctrl |
| 10498802 | Rapgef2       | NM_001099624  | 0.000162159  | 1.28123 | E11.5 * Wnt1 up vs E11.5 * Ctrl |
| 10569265 | Tollip        | NM_023764     | 0.000832907  | 1.28123 | E11.5 * Wnt1 up vs E11.5 * Ctrl |
| 10388238 | Tmem93        | NM_025318     | 0.00849934   | 1.28114 | E11.5 * Wnt1 up vs E11.5 * Ctrl |
| 10370483 | Rrp1          | NM_010925     | 0.00329596   | 1.28107 | E11.5 * Wnt1 up vs E11.5 * Ctrl |
| 10433462 | Pmm2          | NM_016881     | 0.00683332   | 1.28102 | E11.5 * Wnt1 up vs E11.5 * Ctrl |
| 10411899 | 2410002O22Rik | NM_025879     | 0.00285335   | 1.28101 | E11.5 * Wnt1 up vs E11.5 * Ctrl |
| 10585860 | Adpgk         | NM_028121     | 0.00262025   | 1.2808  | E11.5 * Wnt1 up vs E11.5 * Ctrl |
| 10415980 | Fbxo16        | NM_015795     | 0.00837749   | 1.2808  | E11.5 * Wnt1 up vs E11.5 * Ctrl |
| 10516246 | Cdca8         | NM_026560     | 0.000181446  | 1.28075 | E11.5 * Wnt1 up vs E11.5 * Ctrl |
| 10478778 | Arfgef2       | NM_001085495  | 0.00471621   | 1.28033 | E11.5 * Wnt1 up vs E11.5 * Ctrl |
| 10396800 | Plekhh1       | ENSMUST000001 | 5.52094e-005 | 1.28025 | E11.5 * Wnt1 up vs E11.5 * Ctrl |
| 10456764 | Smad2         | NM_010754     | 5.82214e-005 | 1.27996 | E11.5 * Wnt1 up vs E11.5 * Ctrl |
| 10575512 | Cog4          | NM_133973     | 0.00170093   | 1.27994 | E11.5 * Wnt1 up vs E11.5 * Ctrl |
| 10582669 | Ttc13         | NM_145607     | 0.000257646  | 1.27993 | E11.5 * Wnt1 up vs E11.5 * Ctrl |
| 10483381 | Stk39         | NM_016866     | 8.00797e-005 | 1.27979 | E11.5 * Wnt1 up vs E11.5 * Ctrl |
| 10605659 | OTTMUSG00000  | ENSMUST000001 | 0.00771431   | 1.27963 | E11.5 * Wnt1 up vs E11.5 * Ctrl |
| 10576524 | Gm505         | NM_001111141  | 0.00236002   | 1.27922 | E11.5 * Wnt1 up vs E11.5 * Ctrl |
| 10461439 | Fads1         | NM_146094     | 0.00855255   | 1.27867 | E11.5 * Wnt1 up vs E11.5 * Ctrl |
| 10527430 | Arpc1a        | NM_019767     | 4.64859e-006 | 1.27853 | E11.5 * Wnt1 up vs E11.5 * Ctrl |
| 10461237 | Bscl2         | NM_001136064  | 0.000967283  | 1.2785  | E11.5 * Wnt1 up vs E11.5 * Ctrl |
| 10446739 | Clip4         | NM_030179     | 0.00868422   | 1.27825 | E11.5 * Wnt1 up vs E11.5 * Ctrl |
| 10583992 | Igsf9b        | NM_001129787  | 0.000469593  | 1.27807 | E11.5 * Wnt1 up vs E11.5 * Ctrl |
| 10438478 | Abcc5         | NM_013790     | 0.000120379  | 1.27767 | E11.5 * Wnt1 up vs E11.5 * Ctrl |
| 10471036 | Dolpp1        | NM_020329     | 0.00455461   | 1.27752 | E11.5 * Wnt1 up vs E11.5 * Ctrl |
| 10496397 | Mapksp1       | NM_019920     | 0.000547772  | 1.27716 | E11.5 * Wnt1 up vs E11.5 * Ctrl |
| 10547140 | Tmcc1         | ENSMUST000001 | 9.28046e-005 | 1.2771  | E11.5 * Wnt1 up vs E11.5 * Ctrl |
| 10576373 | Gas8          | NM_018855     | 5.02521e-005 | 1.277   | E11.5 * Wnt1 up vs E11.5 * Ctrl |
| 10589494 | Cspg5         | NM_013884     | 0.007786     | 1.27696 | E11.5 * Wnt1 up vs E11.5 * Ctrl |
| 10367634 | Akap12        | NM_031185     | 0.000159519  | 1.27683 | E11.5 * Wnt1 up vs E11.5 * Ctrl |
| 10500630 | Ttf2          | NM_001013026  | 0.00569717   | 1.27635 | E11.5 * Wnt1 up vs E11.5 * Ctrl |
| 10581560 | Psmd7         | NM_010817     | 0.000253158  | 1.27632 | E11.5 * Wnt1 up vs E11.5 * Ctrl |
| 10507851 | Pabpc4        | NM_130881     | 0.00169935   | 1.27623 | E11.5 * Wnt1 up vs E11.5 * Ctrl |
| 10470119 | Edf1          | NM_021519     | 0.000146546  | 1.27605 | E11.5 * Wnt1 up vs E11.5 * Ctrl |
| 10478447 | Stk4          | NM_021420     | 1.91256e-005 | 1.27599 | E11.5 * Wnt1 up vs E11.5 * Ctrl |
| 10558090 | Tacc2         | NM_001004468  | 0.000390215  | 1.27594 | E11.5 * Wnt1 up vs E11.5 * Ctrl |
| 10533644 | Vps33a        | NM_029929     | 0.000156549  | 1.27594 | E11.5 * Wnt1 up vs E11.5 * Ctrl |
| 10499777 | Ints3         | NM_145540     | 0.00280891   | 1.27591 | E11.5 * Wnt1 up vs E11.5 * Ctrl |
| 10547177 | Rassf4        | NM_178045     | 0.00689433   | 1.27591 | E11.5 * Wnt1 up vs E11.5 * Ctrl |
| 10480921 | Qsox2         | NM_153559     | 0.0010462    | 1.27582 | E11.5 * Wnt1 up vs E11.5 * Ctrl |
| 10457924 | Bloc1s1       | NM_015740     | 0.0041247    | 1.27567 | E11.5 * Wnt1 up vs E11.5 * Ctrl |
| 10423599 | Matn2         | NM_016762     | 0.00847201   | 1.27551 | E11.5 * Wnt1 up vs E11.5 * Ctrl |
| 10526381 | Mdh2          | NM_008617     | 0.000710807  | 1.27542 | E11.5 * Wnt1 up vs E11.5 * Ctrl |
| 10397428 | 1700020O03Rik | BC048169      | 0.00629525   | 1.27506 | E11.5 * Wnt1 up vs E11.5 * Ctrl |
| 10393177 | Acox1         | NM_015729     | 0.00567      | 1.27477 | E11.5 * Wnt1 up vs E11.5 * Ctrl |
| 10428157 | Rnf19a        | NM_013923     | 0.00116685   | 1.27462 | E11.5 * Wnt1 up vs E11.5 * Ctrl |
| 10395005 | Kidins220     | NM_001081378  | 5.05761e-005 | 1.27456 | E11.5 * Wnt1 up vs E11.5 * Ctrl |
| 10465336 | Mrpl49        | NM_026246     | 0.00214626   | 1.27439 | E11.5 * Wnt1 up vs E11.5 * Ctrl |
| 10361200 | AA408296      | NM_145415     | 4.16323e-005 | 1.27424 | E11.5 * Wnt1 up vs E11.5 * Ctrl |
| 10580274 | Rnaseh2a      | NM_027187     | 0.00649843   | 1.27418 | E11.5 * Wnt1 up vs E11.5 * Ctrl |
| 10479411 | Ogfr          | NM_031373     | 0.000159096  | 1.27418 | E11.5 * Wnt1 up vs E11.5 * Ctrl |
| 10430871 | Tdg           | NM_011561     | 0.000124923  | 1.27418 | E11.5 * Wnt1 up vs E11.5 * Ctrl |

|          |               |              |              |         |                                 |
|----------|---------------|--------------|--------------|---------|---------------------------------|
| 10418991 | Gcap14        | NM_027045    | 0.000354472  | 1.27399 | E11.5 * Wnt1 up vs E11.5 * Ctrl |
| 10427277 | Hoxc11        | NM_001024842 | 0.000375663  | 1.27354 | E11.5 * Wnt1 up vs E11.5 * Ctrl |
| 10440491 | App           | NM_007471    | 0.00511864   | 1.27348 | E11.5 * Wnt1 up vs E11.5 * Ctrl |
| 10562360 | Gpi1          | NM_008155    | 0.00408145   | 1.27348 | E11.5 * Wnt1 up vs E11.5 * Ctrl |
| 10421917 | Pabpc4        | NM_148917    | 0.00204751   | 1.27345 | E11.5 * Wnt1 up vs E11.5 * Ctrl |
| 10486469 | Vps39         | NM_147153    | 0.00174431   | 1.27336 | E11.5 * Wnt1 up vs E11.5 * Ctrl |
| 10360794 | Fbxo28        | NM_175127    | 1.29262e-006 | 1.27322 | E11.5 * Wnt1 up vs E11.5 * Ctrl |
| 10485429 | Pdhx          | NM_175094    | 0.00197171   | 1.27286 | E11.5 * Wnt1 up vs E11.5 * Ctrl |
| 10502881 | St6galnac5    | NM_012028    | 0.00361459   | 1.27271 | E11.5 * Wnt1 up vs E11.5 * Ctrl |
| 10396306 | 1200003C05Rik | NM_024205    | 0.001826     | 1.27245 | E11.5 * Wnt1 up vs E11.5 * Ctrl |
| 10536425 | ---           | ---          | 0.00828817   | 1.27233 | E11.5 * Wnt1 up vs E11.5 * Ctrl |
| 10589004 | Qars          | NM_133794    | 0.000855629  | 1.27231 | E11.5 * Wnt1 up vs E11.5 * Ctrl |
| 10376033 | Kif3a         | NM_008443    | 3.38789e-005 | 1.27227 | E11.5 * Wnt1 up vs E11.5 * Ctrl |
| 10442458 | Gbl           | NM_019988    | 0.000389211  | 1.27222 | E11.5 * Wnt1 up vs E11.5 * Ctrl |
| 10529375 | Mxd4          | NM_010753    | 0.00241818   | 1.27185 | E11.5 * Wnt1 up vs E11.5 * Ctrl |
| 10409222 | Shc3          | NM_009167    | 0.00496789   | 1.27157 | E11.5 * Wnt1 up vs E11.5 * Ctrl |
| 10596680 | Sema3b        | NM_001042779 | 0.00813599   | 1.27127 | E11.5 * Wnt1 up vs E11.5 * Ctrl |
| 10598882 | Uba1          | NM_009457    | 2.89128e-006 | 1.27099 | E11.5 * Wnt1 up vs E11.5 * Ctrl |
| 10583697 | Smarca4       | NM_011417    | 0.000237293  | 1.27026 | E11.5 * Wnt1 up vs E11.5 * Ctrl |
| 10437712 | Zc3h7a        | NM_145931    | 0.00427786   | 1.27014 | E11.5 * Wnt1 up vs E11.5 * Ctrl |
| 10556178 | Tub           | NM_021885    | 0.00478953   | 1.2699  | E11.5 * Wnt1 up vs E11.5 * Ctrl |
| 10458398 | Hars          | NM_008214    | 0.000342203  | 1.26946 | E11.5 * Wnt1 up vs E11.5 * Ctrl |
| 10421661 | Gtf2f2        | NM_026816    | 0.000188158  | 1.26917 | E11.5 * Wnt1 up vs E11.5 * Ctrl |
| 10415766 | Sacs          | NM_172809    | 0.000859869  | 1.26903 | E11.5 * Wnt1 up vs E11.5 * Ctrl |
| 10517263 | Fam54b        | BC026808     | 0.000838126  | 1.26895 | E11.5 * Wnt1 up vs E11.5 * Ctrl |
| 10406111 | Slc12a7       | NM_011390    | 0.00878111   | 1.26872 | E11.5 * Wnt1 up vs E11.5 * Ctrl |
| 10460490 | Dpp3          | NM_133803    | 0.00310476   | 1.26863 | E11.5 * Wnt1 up vs E11.5 * Ctrl |
| 10525804 | Atp6v0a2      | NM_011596    | 0.00809574   | 1.26839 | E11.5 * Wnt1 up vs E11.5 * Ctrl |
| 10344637 | Atp6v1h       | NM_133826    | 0.000193819  | 1.26834 | E11.5 * Wnt1 up vs E11.5 * Ctrl |
| 10574632 | Cbfb          | NM_022309    | 7.77506e-005 | 1.26823 | E11.5 * Wnt1 up vs E11.5 * Ctrl |
| 10601915 | BC031748      | BC031748     | 0.000779578  | 1.2681  | E11.5 * Wnt1 up vs E11.5 * Ctrl |
| 10368883 | Tdg           | NM_011561    | 0.000245434  | 1.26794 | E11.5 * Wnt1 up vs E11.5 * Ctrl |
| 10556576 | 1110004F10Rik | NM_019772    | 0.00121685   | 1.26783 | E11.5 * Wnt1 up vs E11.5 * Ctrl |
| 10575662 | Mon1b         | NM_173015    | 0.000990474  | 1.26764 | E11.5 * Wnt1 up vs E11.5 * Ctrl |
| 10570236 | Mcf2l         | NM_178076    | 0.000808896  | 1.26753 | E11.5 * Wnt1 up vs E11.5 * Ctrl |
| 10395129 | Tmem18        | NM_172049    | 0.000451524  | 1.26733 | E11.5 * Wnt1 up vs E11.5 * Ctrl |
| 10388532 | Nxn           | NM_008750    | 0.00631907   | 1.26727 | E11.5 * Wnt1 up vs E11.5 * Ctrl |
| 10472994 | Mtx2          | NM_016804    | 5.77943e-005 | 1.26716 | E11.5 * Wnt1 up vs E11.5 * Ctrl |
| 10425559 | L3mbtl2       | NM_145993    | 0.000414188  | 1.26711 | E11.5 * Wnt1 up vs E11.5 * Ctrl |
| 10599498 | Utp14a        | NM_028276    | 5.59469e-005 | 1.26692 | E11.5 * Wnt1 up vs E11.5 * Ctrl |
| 10347774 | Mrpl44        | NM_001081210 | 0.00230029   | 1.26683 | E11.5 * Wnt1 up vs E11.5 * Ctrl |
| 10423333 | Fam134b       | NM_001034851 | 0.0040003    | 1.2667  | E11.5 * Wnt1 up vs E11.5 * Ctrl |
| 10500808 | Olfml3        | NM_133859    | 0.00154693   | 1.26631 | E11.5 * Wnt1 up vs E11.5 * Ctrl |
| 10394749 | Nol10         | NM_001008421 | 0.00337157   | 1.26619 | E11.5 * Wnt1 up vs E11.5 * Ctrl |
| 10477353 | Mapre1        | NM_007896    | 2.75084e-005 | 1.26596 | E11.5 * Wnt1 up vs E11.5 * Ctrl |
| 10438603 | Igf2bp2       | NM_183029    | 0.00363881   | 1.26594 | E11.5 * Wnt1 up vs E11.5 * Ctrl |
| 10437311 | Trap1         | NM_026508    | 0.000305735  | 1.2656  | E11.5 * Wnt1 up vs E11.5 * Ctrl |
| 10455227 | Rnf14         | NM_020012    | 2.15148e-005 | 1.26559 | E11.5 * Wnt1 up vs E11.5 * Ctrl |
| 10601473 | Apool         | NM_026565    | 0.00799289   | 1.26538 | E11.5 * Wnt1 up vs E11.5 * Ctrl |
| 10553301 | Ldha          | NM_010699    | 0.0037853    | 1.26476 | E11.5 * Wnt1 up vs E11.5 * Ctrl |
| 10376314 | Cnot8         | NM_026949    | 0.00397961   | 1.26414 | E11.5 * Wnt1 up vs E11.5 * Ctrl |
| 10386551 | Flii          | NM_022009    | 0.000838055  | 1.26414 | E11.5 * Wnt1 up vs E11.5 * Ctrl |
| 10483648 | Ola1          | NM_025942    | 0.00566835   | 1.26398 | E11.5 * Wnt1 up vs E11.5 * Ctrl |
| 10561673 | Spred3        | NM_182927    | 0.0020395    | 1.26397 | E11.5 * Wnt1 up vs E11.5 * Ctrl |
| 10393320 | Ube2o         | NM_173755    | 0.000922875  | 1.26373 | E11.5 * Wnt1 up vs E11.5 * Ctrl |
| 10585932 | Pkm2          | NM_011099    | 0.00719002   | 1.26354 | E11.5 * Wnt1 up vs E11.5 * Ctrl |
| 10463704 | As3mt         | NM_020577    | 0.000586034  | 1.2633  | E11.5 * Wnt1 up vs E11.5 * Ctrl |
| 10405074 | Nol8          | NM_001081350 | 0.00250453   | 1.26318 | E11.5 * Wnt1 up vs E11.5 * Ctrl |
| 10374485 | Peli1         | NM_023324    | 0.00460713   | 1.26317 | E11.5 * Wnt1 up vs E11.5 * Ctrl |
| 10345230 | Rab23         | NM_008999    | 0.00138867   | 1.26256 | E11.5 * Wnt1 up vs E11.5 * Ctrl |
| 10483584 | Mettl8        | NM_145524    | 0.00229635   | 1.2623  | E11.5 * Wnt1 up vs E11.5 * Ctrl |
| 10457546 | Osbpl1a       | NM_207530    | 0.000837796  | 1.26213 | E11.5 * Wnt1 up vs E11.5 * Ctrl |
| 10384885 | Spnb2         | NM_175836    | 7.67866e-005 | 1.26207 | E11.5 * Wnt1 up vs E11.5 * Ctrl |
| 10558134 | Plekha1       | NM_133942    | 0.00168124   | 1.26206 | E11.5 * Wnt1 up vs E11.5 * Ctrl |
| 10465263 | Dpf2          | NM_011262    | 0.000226781  | 1.26205 | E11.5 * Wnt1 up vs E11.5 * Ctrl |
| 10573434 | Farsa         | NM_025648    | 0.0067816    | 1.26187 | E11.5 * Wnt1 up vs E11.5 * Ctrl |

|                        |              |              |         |                                 |
|------------------------|--------------|--------------|---------|---------------------------------|
| 10468489 Xpnpep1       | NM_133216    | 0.000327881  | 1.26175 | E11.5 * Wnt1 up vs E11.5 * Ctrl |
| 10370025 Smarcb1       | NM_011418    | 0.000603248  | 1.26163 | E11.5 * Wnt1 up vs E11.5 * Ctrl |
| 10403041               | ---          | 0.000672495  | 1.26115 | E11.5 * Wnt1 up vs E11.5 * Ctrl |
| 10383485 Gps1          | NM_145370    | 0.00277086   | 1.26098 | E11.5 * Wnt1 up vs E11.5 * Ctrl |
| 10425822 Pnpla3        | NM_054088    | 0.00501531   | 1.26097 | E11.5 * Wnt1 up vs E11.5 * Ctrl |
| 10485828 Slc12a6       | NM_133648    | 0.00295013   | 1.26091 | E11.5 * Wnt1 up vs E11.5 * Ctrl |
| 10385616 Rufy1         | NM_172557    | 0.00248954   | 1.26089 | E11.5 * Wnt1 up vs E11.5 * Ctrl |
| 10432215 Ddx23         | NM_001080981 | 0.00493159   | 1.26085 | E11.5 * Wnt1 up vs E11.5 * Ctrl |
| 10424400 Myc           | NM_010849    | 0.00733068   | 1.26073 | E11.5 * Wnt1 up vs E11.5 * Ctrl |
| 10564266 Peg12         | NM_013788    | 0.00205423   | 1.26024 | E11.5 * Wnt1 up vs E11.5 * Ctrl |
| 10521163 Gm1673        | BC147444     | 0.00417006   | 1.26006 | E11.5 * Wnt1 up vs E11.5 * Ctrl |
| 10546567 A130022J15Rik | NM_175313    | 0.00460954   | 1.25994 | E11.5 * Wnt1 up vs E11.5 * Ctrl |
| 10419759 Prmt5         | NM_013768    | 0.00547715   | 1.25981 | E11.5 * Wnt1 up vs E11.5 * Ctrl |
| 10502131 Lrit3         | XM_143529    | 0.00862429   | 1.25961 | E11.5 * Wnt1 up vs E11.5 * Ctrl |
| 10399379 Pkg1          | NM_008828    | 6.95896e-007 | 1.2596  | E11.5 * Wnt1 up vs E11.5 * Ctrl |
| 10498313 Pkg1          | NM_008828    | 6.95896e-007 | 1.2596  | E11.5 * Wnt1 up vs E11.5 * Ctrl |
| 10528546 Gabarapl2     | NM_026693    | 0.00303687   | 1.25952 | E11.5 * Wnt1 up vs E11.5 * Ctrl |
| 10365230 Tdg           | NM_172552    | 0.000276225  | 1.25946 | E11.5 * Wnt1 up vs E11.5 * Ctrl |
| 10383671 Drg1          | NM_007879    | 5.7267e-005  | 1.25898 | E11.5 * Wnt1 up vs E11.5 * Ctrl |
| 10517328 Tmem50a       | NM_027935    | 4.45188e-005 | 1.25885 | E11.5 * Wnt1 up vs E11.5 * Ctrl |
| 10370259 Col18a1       | NM_009929    | 0.00129171   | 1.25855 | E11.5 * Wnt1 up vs E11.5 * Ctrl |
| 10391755 Ccdc43        | NM_025918    | 0.000641185  | 1.25853 | E11.5 * Wnt1 up vs E11.5 * Ctrl |
| 10573217 Ddx39         | NM_197982    | 0.000318941  | 1.2585  | E11.5 * Wnt1 up vs E11.5 * Ctrl |
| 10450648 Abcf1         | NM_013854    | 0.00491038   | 1.25808 | E11.5 * Wnt1 up vs E11.5 * Ctrl |
| 10575476 Vac14         | NM_146216    | 0.0029963    | 1.25708 | E11.5 * Wnt1 up vs E11.5 * Ctrl |
| 10433721 Nde1          | NM_023317    | 0.000710001  | 1.25703 | E11.5 * Wnt1 up vs E11.5 * Ctrl |
| 10568050 Aldoa         | NM_007438    | 0.00496778   | 1.25694 | E11.5 * Wnt1 up vs E11.5 * Ctrl |
| 10580510 Sall1         | NM_021390    | 0.00465346   | 1.25679 | E11.5 * Wnt1 up vs E11.5 * Ctrl |
| 10452110 2410015M20Rik | NM_153152    | 0.0080124    | 1.25677 | E11.5 * Wnt1 up vs E11.5 * Ctrl |
| 10591139 Naalad2       | NM_028279    | 0.00174301   | 1.25661 | E11.5 * Wnt1 up vs E11.5 * Ctrl |
| 10557628 Zfp689        | NM_175163    | 0.00389221   | 1.25623 | E11.5 * Wnt1 up vs E11.5 * Ctrl |
| 10349401 Gpr39         | NM_027677    | 0.000593597  | 1.25601 | E11.5 * Wnt1 up vs E11.5 * Ctrl |
| 10541049 March8        | NM_027920    | 0.00506596   | 1.25594 | E11.5 * Wnt1 up vs E11.5 * Ctrl |
| 10463751 Pdcd11        | NM_011053    | 0.00116709   | 1.25567 | E11.5 * Wnt1 up vs E11.5 * Ctrl |
| 10607332               | ---          | 0.00665622   | 1.25563 | E11.5 * Wnt1 up vs E11.5 * Ctrl |
| 10559270 Tssc4         | NM_020285    | 0.000503589  | 1.25557 | E11.5 * Wnt1 up vs E11.5 * Ctrl |
| 10561401 Supt5h        | NM_013676    | 0.00364119   | 1.25538 | E11.5 * Wnt1 up vs E11.5 * Ctrl |
| 10519183 Atad3a        | NM_179203    | 0.00390058   | 1.25536 | E11.5 * Wnt1 up vs E11.5 * Ctrl |
| 10476969 Pygb          | NM_153781    | 0.00260924   | 1.25516 | E11.5 * Wnt1 up vs E11.5 * Ctrl |
| 10358259 Nek7          | NM_021605    | 0.00375548   | 1.25515 | E11.5 * Wnt1 up vs E11.5 * Ctrl |
| 10397719 Tdp1          | NM_028354    | 0.000905564  | 1.25513 | E11.5 * Wnt1 up vs E11.5 * Ctrl |
| 10463254 D19Ertd386e   | NM_177464    | 0.00182508   | 1.25509 | E11.5 * Wnt1 up vs E11.5 * Ctrl |
| 10448064 Prdm9         | NM_144809    | 0.0032601    | 1.25509 | E11.5 * Wnt1 up vs E11.5 * Ctrl |
| 10470751 Slc27a4       | NM_011989    | 0.000751172  | 1.25486 | E11.5 * Wnt1 up vs E11.5 * Ctrl |
| 10561306 Pld3          | NM_011116    | 0.00383766   | 1.25475 | E11.5 * Wnt1 up vs E11.5 * Ctrl |
| 10471535 Fam129b       | NM_146119    | 0.00619949   | 1.25463 | E11.5 * Wnt1 up vs E11.5 * Ctrl |
| 10545812 Sfxn5         | NM_178639    | 0.00699894   | 1.25456 | E11.5 * Wnt1 up vs E11.5 * Ctrl |
| 10464704 Adrbk1        | NM_130863    | 0.00446338   | 1.25452 | E11.5 * Wnt1 up vs E11.5 * Ctrl |
| 10538087 Lrrc61        | NM_177736    | 0.00479418   | 1.25421 | E11.5 * Wnt1 up vs E11.5 * Ctrl |
| 10392347 Pitpnc1       | NM_145823    | 0.00023934   | 1.25412 | E11.5 * Wnt1 up vs E11.5 * Ctrl |
| 10378334 Tax1bp3       | NM_029564    | 0.000333871  | 1.25407 | E11.5 * Wnt1 up vs E11.5 * Ctrl |
| 10477297 Kif3b         | NM_008444    | 0.00811119   | 1.25394 | E11.5 * Wnt1 up vs E11.5 * Ctrl |
| 10469020 Bend7         | NM_178663    | 0.00053314   | 1.25384 | E11.5 * Wnt1 up vs E11.5 * Ctrl |
| 10465604 Stip1         | NM_016737    | 0.000150737  | 1.25383 | E11.5 * Wnt1 up vs E11.5 * Ctrl |
| 10410687               | ---          | 0.00595402   | 1.25381 | E11.5 * Wnt1 up vs E11.5 * Ctrl |
| 10557631 Prr14         | NM_145589    | 2.07668e-005 | 1.25378 | E11.5 * Wnt1 up vs E11.5 * Ctrl |
| 10565288 Fam108c       | NM_133722    | 0.000344282  | 1.25373 | E11.5 * Wnt1 up vs E11.5 * Ctrl |
| 10524124 Golga3        | NM_008146    | 7.58996e-005 | 1.25325 | E11.5 * Wnt1 up vs E11.5 * Ctrl |
| 10385335               | ---          | 0.00582427   | 1.2527  | E11.5 * Wnt1 up vs E11.5 * Ctrl |
| 10477187 Tpx2          | NM_001141977 | 0.00247875   | 1.25257 | E11.5 * Wnt1 up vs E11.5 * Ctrl |
| 10593842 Tspan3        | NM_019793    | 8.8858e-006  | 1.25245 | E11.5 * Wnt1 up vs E11.5 * Ctrl |
| 10561907 0610010E21Rik | NM_001033140 | 0.000596058  | 1.25221 | E11.5 * Wnt1 up vs E11.5 * Ctrl |
| 10467470 Aldh18a1      | NM_019698    | 0.00135572   | 1.252   | E11.5 * Wnt1 up vs E11.5 * Ctrl |
| 10601850 Bex4          | NM_212457    | 0.00312886   | 1.25151 | E11.5 * Wnt1 up vs E11.5 * Ctrl |
| 10347873 Agfg1         | NM_010472    | 0.000338383  | 1.25136 | E11.5 * Wnt1 up vs E11.5 * Ctrl |
| 10357164 Epb4.115      | NM_145506    | 7.57738e-005 | 1.25117 | E11.5 * Wnt1 up vs E11.5 * Ctrl |

|          |               |              |              |         |                                 |
|----------|---------------|--------------|--------------|---------|---------------------------------|
| 10431872 | Slc38a1       | ENSMUST00000 | 0.00159313   | 1.25115 | E11.5 * Wnt1 up vs E11.5 * Ctrl |
| 10574718 | Tmem208       | NM_025486    | 0.00728613   | 1.25111 | E11.5 * Wnt1 up vs E11.5 * Ctrl |
| 10564313 | Mphosph10     | NM_026483    | 0.00536787   | 1.25099 | E11.5 * Wnt1 up vs E11.5 * Ctrl |
| 10409365 | Gprn1         | NM_012014    | 0.00253164   | 1.25095 | E11.5 * Wnt1 up vs E11.5 * Ctrl |
| 10373454 | Pa2g4         | NM_011119    | 0.000410173  | 1.25079 | E11.5 * Wnt1 up vs E11.5 * Ctrl |
| 10537463 | Agk           | NM_023538    | 1.46058e-005 | 1.25069 | E11.5 * Wnt1 up vs E11.5 * Ctrl |
| 10578300 | Mtmr7         | NM_001040699 | 0.00693946   | 1.25058 | E11.5 * Wnt1 up vs E11.5 * Ctrl |
| 10480813 | B230208H17Rik | BC085507     | 0.00428127   | 1.25052 | E11.5 * Wnt1 up vs E11.5 * Ctrl |
| 10498296 | Comm2         | NM_175095    | 5.22313e-005 | 1.25039 | E11.5 * Wnt1 up vs E11.5 * Ctrl |
| 10426550 | Tmem106c      | NM_201359    | 0.00357045   | 1.25028 | E11.5 * Wnt1 up vs E11.5 * Ctrl |
| 10379075 | 2610507B11Rik | NM_001002004 | 4.14396e-005 | 1.25009 | E11.5 * Wnt1 up vs E11.5 * Ctrl |
| 10355813 | Ptpn          | NM_008985    | 0.00545451   | 1.24982 | E11.5 * Wnt1 up vs E11.5 * Ctrl |
| 10488912 | Edem2         | NM_145537    | 0.00746467   | 1.24982 | E11.5 * Wnt1 up vs E11.5 * Ctrl |
| 10572146 | Atp6v1b2      | NM_007509    | 0.00850334   | 1.24971 | E11.5 * Wnt1 up vs E11.5 * Ctrl |
| 10409616 | Spock1        | NM_009262    | 0.00391012   | 1.2497  | E11.5 * Wnt1 up vs E11.5 * Ctrl |
| 10539606 | Cct7          | NM_007638    | 0.000333448  | 1.2497  | E11.5 * Wnt1 up vs E11.5 * Ctrl |
| 10521168 | Nat8l         | NM_001001985 | 0.000765996  | 1.24966 | E11.5 * Wnt1 up vs E11.5 * Ctrl |
| 10508376 | Trim62        | NM_178110    | 0.000175304  | 1.24957 | E11.5 * Wnt1 up vs E11.5 * Ctrl |
| 10447708 | Qk            | NM_021881    | 3.23041e-005 | 1.24939 | E11.5 * Wnt1 up vs E11.5 * Ctrl |
| 10458213 | Etf1          | NM_144866    | 8.67666e-005 | 1.24927 | E11.5 * Wnt1 up vs E11.5 * Ctrl |
| 10518385 | Mfn2          | NM_133201    | 0.00671055   | 1.24926 | E11.5 * Wnt1 up vs E11.5 * Ctrl |
| 10564663 | Tdg           | NM_172552    | 0.00170896   | 1.24872 | E11.5 * Wnt1 up vs E11.5 * Ctrl |
| 10469070 | Nudt5         | NM_016918    | 0.00595268   | 1.24857 | E11.5 * Wnt1 up vs E11.5 * Ctrl |
| 10563615 | Hps5          | NM_001005247 | 0.0023128    | 1.24816 | E11.5 * Wnt1 up vs E11.5 * Ctrl |
| 10459837 | 8030462N17Rik | NM_178670    | 0.00735452   | 1.24814 | E11.5 * Wnt1 up vs E11.5 * Ctrl |
| 10573519 | Tnpo2         | NM_145390    | 0.00444107   | 1.24812 | E11.5 * Wnt1 up vs E11.5 * Ctrl |
| 10560304 | Calm3         | NM_007590    | 0.00421664   | 1.24804 | E11.5 * Wnt1 up vs E11.5 * Ctrl |
| 10460732 | Znhit2        | NM_013859    | 0.00251979   | 1.24783 | E11.5 * Wnt1 up vs E11.5 * Ctrl |
| 10415377 | 2610027L16Rik | NM_026403    | 0.00191879   | 1.24733 | E11.5 * Wnt1 up vs E11.5 * Ctrl |
| 10357698 | Tmcc2         | NM_178874    | 0.00636717   | 1.24712 | E11.5 * Wnt1 up vs E11.5 * Ctrl |
| 10357133 | ---           | ---          | 6.3668e-005  | 1.24694 | E11.5 * Wnt1 up vs E11.5 * Ctrl |
| 10587211 | Leo1          | NM_001039522 | 8.93995e-005 | 1.24665 | E11.5 * Wnt1 up vs E11.5 * Ctrl |
| 10348866 | Atg4b         | NM_174874    | 0.00175254   | 1.24663 | E11.5 * Wnt1 up vs E11.5 * Ctrl |
| 10364675 | Gpx4          | NM_008162    | 0.00247665   | 1.24648 | E11.5 * Wnt1 up vs E11.5 * Ctrl |
| 10422518 | Tmtc4         | NM_028651    | 0.00152555   | 1.24646 | E11.5 * Wnt1 up vs E11.5 * Ctrl |
| 10367337 | Rnf41         | NM_026259    | 0.000327419  | 1.24634 | E11.5 * Wnt1 up vs E11.5 * Ctrl |
| 10575619 | Terf2ip       | NM_020584    | 0.00539326   | 1.24632 | E11.5 * Wnt1 up vs E11.5 * Ctrl |
| 10356628 | Hdac4         | NM_207225    | 0.00631601   | 1.24627 | E11.5 * Wnt1 up vs E11.5 * Ctrl |
| 10549552 | Prpf31        | NM_027328    | 0.00632172   | 1.24621 | E11.5 * Wnt1 up vs E11.5 * Ctrl |
| 10381187 | Atp6v0a1      | NM_016920    | 0.00126846   | 1.24619 | E11.5 * Wnt1 up vs E11.5 * Ctrl |
| 10382980 | Syng2         | NM_009304    | 0.00764273   | 1.24611 | E11.5 * Wnt1 up vs E11.5 * Ctrl |
| 10435266 | Heg1          | NM_175256    | 0.0082397    | 1.24607 | E11.5 * Wnt1 up vs E11.5 * Ctrl |
| 10458607 | Lars          | NM_134137    | 0.000342727  | 1.246   | E11.5 * Wnt1 up vs E11.5 * Ctrl |
| 10523772 | Lrrc8d        | NM_178701    | 0.00530134   | 1.24586 | E11.5 * Wnt1 up vs E11.5 * Ctrl |
| 10517421 | Pnrc2         | NM_026383    | 0.000255617  | 1.24582 | E11.5 * Wnt1 up vs E11.5 * Ctrl |
| 10446235 | Trip10        | NM_134125    | 0.00412307   | 1.24554 | E11.5 * Wnt1 up vs E11.5 * Ctrl |
| 10385175 | Wwc1          | NM_170779    | 0.00374894   | 1.24538 | E11.5 * Wnt1 up vs E11.5 * Ctrl |
| 10468275 | Pcgf6         | NM_027654    | 0.000461557  | 1.24532 | E11.5 * Wnt1 up vs E11.5 * Ctrl |
| 10585610 | Ptpn9         | NM_019651    | 0.000266371  | 1.2453  | E11.5 * Wnt1 up vs E11.5 * Ctrl |
| 10375941 | Vdac1         | NM_011694    | 0.00408945   | 1.24516 | E11.5 * Wnt1 up vs E11.5 * Ctrl |
| 10360764 | Enah          | NM_010135    | 0.000194393  | 1.24481 | E11.5 * Wnt1 up vs E11.5 * Ctrl |
| 10510176 | OTTMUSG00000  | NM_001039233 | 0.00596885   | 1.24472 | E11.5 * Wnt1 up vs E11.5 * Ctrl |
| 10479560 | Rtel1         | NM_001001882 | 0.00115681   | 1.24458 | E11.5 * Wnt1 up vs E11.5 * Ctrl |
| 10591357 | Eif3g         | NM_016876    | 0.00392311   | 1.24444 | E11.5 * Wnt1 up vs E11.5 * Ctrl |
| 10475965 | Polr1b        | NM_009086    | 0.001143     | 1.24442 | E11.5 * Wnt1 up vs E11.5 * Ctrl |
| 10465804 | Polr2g        | NM_026329    | 0.00111459   | 1.24414 | E11.5 * Wnt1 up vs E11.5 * Ctrl |
| 10420532 | Atp8a2        | NM_015803    | 0.00179494   | 1.24376 | E11.5 * Wnt1 up vs E11.5 * Ctrl |
| 10541446 | Cpamd8        | NM_008646    | 0.00436445   | 1.24365 | E11.5 * Wnt1 up vs E11.5 * Ctrl |
| 10532892 | 1500011B03Rik | ENSMUST00000 | 0.000168162  | 1.24341 | E11.5 * Wnt1 up vs E11.5 * Ctrl |
| 10491977 | 2810046L04Rik | NM_173382    | 0.00858576   | 1.24339 | E11.5 * Wnt1 up vs E11.5 * Ctrl |
| 10496621 | Gtf2b         | NM_145546    | 0.0039599    | 1.24325 | E11.5 * Wnt1 up vs E11.5 * Ctrl |
| 10576696 | Insr          | NM_010568    | 0.000194375  | 1.24319 | E11.5 * Wnt1 up vs E11.5 * Ctrl |
| 10591192 | Olf847        | NM_146525    | 0.0048441    | 1.24303 | E11.5 * Wnt1 up vs E11.5 * Ctrl |
| 10502165 | Sec24b        | NM_207209    | 1.5671e-006  | 1.24302 | E11.5 * Wnt1 up vs E11.5 * Ctrl |
| 10369761 | Reep3         | NM_178606    | 0.000616059  | 1.24296 | E11.5 * Wnt1 up vs E11.5 * Ctrl |
| 10413502 | Actr8         | NM_027493    | 0.00383765   | 1.24275 | E11.5 * Wnt1 up vs E11.5 * Ctrl |

|                        |              |              |         |                                 |
|------------------------|--------------|--------------|---------|---------------------------------|
| 10397741 Psmc1         | NM_008947    | 0.000636707  | 1.2426  | E11.5 * Wnt1 up vs E11.5 * Ctrl |
| 10589420 Cdc25a        | NM_007658    | 0.000983453  | 1.24254 | E11.5 * Wnt1 up vs E11.5 * Ctrl |
| 10519488 Tubb2c        | NM_146116    | 0.00730997   | 1.24242 | E11.5 * Wnt1 up vs E11.5 * Ctrl |
| 10577560 Ikbkb         | NM_010546    | 0.000362519  | 1.24235 | E11.5 * Wnt1 up vs E11.5 * Ctrl |
| 10562399 Kctd15        | NM_146188    | 0.00408389   | 1.2422  | E11.5 * Wnt1 up vs E11.5 * Ctrl |
| 10360076 Ndufs2        | NM_153064    | 0.00160096   | 1.2421  | E11.5 * Wnt1 up vs E11.5 * Ctrl |
| 10573566 Dhps          | NM_001039514 | 0.000790457  | 1.24199 | E11.5 * Wnt1 up vs E11.5 * Ctrl |
| 10402835 Nudt14        | NM_025399    | 0.00366677   | 1.24192 | E11.5 * Wnt1 up vs E11.5 * Ctrl |
| 10349249 Clasp1        | NM_001081276 | 0.00187422   | 1.2418  | E11.5 * Wnt1 up vs E11.5 * Ctrl |
| 10443021 Atp6v0e       | NM_025272    | 0.000984905  | 1.24179 | E11.5 * Wnt1 up vs E11.5 * Ctrl |
| 10473097 Plekha3       | NM_031256    | 0.00496063   | 1.24157 | E11.5 * Wnt1 up vs E11.5 * Ctrl |
| 10485183 Slc35c1       | NM_211358    | 0.00145438   | 1.24151 | E11.5 * Wnt1 up vs E11.5 * Ctrl |
| 10463168 Pgam1         | NM_023418    | 0.0020829    | 1.2414  | E11.5 * Wnt1 up vs E11.5 * Ctrl |
| 10561302 Pgam1         | NM_023418    | 0.0020829    | 1.2414  | E11.5 * Wnt1 up vs E11.5 * Ctrl |
| 10594988 Mapk6         | NM_015806    | 2.85214e-005 | 1.24135 | E11.5 * Wnt1 up vs E11.5 * Ctrl |
| 10419223 Fermt2        | NM_146054    | 0.000315705  | 1.24126 | E11.5 * Wnt1 up vs E11.5 * Ctrl |
| 10440406 Nrip1         | NM_173440    | 0.000459871  | 1.24114 | E11.5 * Wnt1 up vs E11.5 * Ctrl |
| 10397818 Cpsf2         | NM_016856    | 6.25352e-006 | 1.24101 | E11.5 * Wnt1 up vs E11.5 * Ctrl |
| 10363845 Ccdc6         | NM_001111121 | 0.00217754   | 1.24098 | E11.5 * Wnt1 up vs E11.5 * Ctrl |
| 10567303 Coq7          | NM_009940    | 0.00218273   | 1.24075 | E11.5 * Wnt1 up vs E11.5 * Ctrl |
| 10504349 Creb3         | NM_013497    | 0.00672677   | 1.24037 | E11.5 * Wnt1 up vs E11.5 * Ctrl |
| 10395466 Dock4         | NM_172803    | 0.00211027   | 1.24033 | E11.5 * Wnt1 up vs E11.5 * Ctrl |
| 10555414 Rab6          | NM_024287    | 0.00272082   | 1.24016 | E11.5 * Wnt1 up vs E11.5 * Ctrl |
| 10452213 Gtf2f1        | NM_133801    | 0.00172681   | 1.24015 | E11.5 * Wnt1 up vs E11.5 * Ctrl |
| 10524004 Pcgf3         | NM_172716    | 0.00017964   | 1.24013 | E11.5 * Wnt1 up vs E11.5 * Ctrl |
| 10346668 Fam117b       | NM_001037725 | 0.00211983   | 1.24009 | E11.5 * Wnt1 up vs E11.5 * Ctrl |
| 10449644 Glo1          | NM_025374    | 0.00358531   | 1.24005 | E11.5 * Wnt1 up vs E11.5 * Ctrl |
| 10407782 Edaradd       | NM_133643    | 0.00606134   | 1.24003 | E11.5 * Wnt1 up vs E11.5 * Ctrl |
| 10405994 Med10         | NM_138596    | 0.00191054   | 1.23991 | E11.5 * Wnt1 up vs E11.5 * Ctrl |
| 10469951 Rnf208        | NM_176834    | 0.00447596   | 1.2399  | E11.5 * Wnt1 up vs E11.5 * Ctrl |
| 10567941 Eif3c         | NM_146200    | 3.35106e-006 | 1.23968 | E11.5 * Wnt1 up vs E11.5 * Ctrl |
| 10589784 Dclk3         | NM_172928    | 0.00684367   | 1.23968 | E11.5 * Wnt1 up vs E11.5 * Ctrl |
| 10566405 Mapksp1       | NM_019920    | 0.00244714   | 1.23933 | E11.5 * Wnt1 up vs E11.5 * Ctrl |
| 10395538 Pnpla8        | NM_026164    | 0.00110781   | 1.23906 | E11.5 * Wnt1 up vs E11.5 * Ctrl |
| 10533849 Rilpl1        | NM_021430    | 0.001989     | 1.23901 | E11.5 * Wnt1 up vs E11.5 * Ctrl |
| 10473045 Rbm45         | NM_153405    | 0.00136325   | 1.23892 | E11.5 * Wnt1 up vs E11.5 * Ctrl |
| 10565996 Inpp1         | NM_010567    | 0.00795495   | 1.23865 | E11.5 * Wnt1 up vs E11.5 * Ctrl |
| 10409557 H2afy         | NM_012015    | 2.90291e-005 | 1.23853 | E11.5 * Wnt1 up vs E11.5 * Ctrl |
| 10590325 Cttnb1        | NM_007614    | 0.00305276   | 1.23837 | E11.5 * Wnt1 up vs E11.5 * Ctrl |
| 10520800 Gpn1          | NM_133756    | 0.00027112   | 1.23825 | E11.5 * Wnt1 up vs E11.5 * Ctrl |
| 10364338 1810043G02Rik | NM_026431    | 0.00157217   | 1.23783 | E11.5 * Wnt1 up vs E11.5 * Ctrl |
| 10372116 Csl           | NM_027945    | 0.000499501  | 1.23781 | E11.5 * Wnt1 up vs E11.5 * Ctrl |
| 10452496 Ralbp1        | NM_009067    | 0.000676977  | 1.23741 | E11.5 * Wnt1 up vs E11.5 * Ctrl |
| 10460833 Ehd1          | NM_010119    | 0.000186169  | 1.2374  | E11.5 * Wnt1 up vs E11.5 * Ctrl |
| 10498568 Shox2         | NM_013665    | 0.00132826   | 1.23733 | E11.5 * Wnt1 up vs E11.5 * Ctrl |
| 10416082 Trim35        | NM_029979    | 0.000752727  | 1.23707 | E11.5 * Wnt1 up vs E11.5 * Ctrl |
| 10504551 Rg9mtd3       | NM_027266    | 0.00338919   | 1.23682 | E11.5 * Wnt1 up vs E11.5 * Ctrl |
| 10393222 Srp68         | NM_146032    | 0.00290017   | 1.23671 | E11.5 * Wnt1 up vs E11.5 * Ctrl |
| 10356379 Ecel1         | NM_021306    | 0.00876867   | 1.23656 | E11.5 * Wnt1 up vs E11.5 * Ctrl |
| 10472440 Tax1bp3       | NM_029564    | 0.000430184  | 1.23634 | E11.5 * Wnt1 up vs E11.5 * Ctrl |
| 10404827 Nol7          | NM_023554    | 0.00491713   | 1.23626 | E11.5 * Wnt1 up vs E11.5 * Ctrl |
| 10438112 Pi4ka         | NM_001001983 | 5.87653e-005 | 1.23625 | E11.5 * Wnt1 up vs E11.5 * Ctrl |
| 10543369 Cadps2        | NM_153163    | 0.00150511   | 1.23624 | E11.5 * Wnt1 up vs E11.5 * Ctrl |
| 10415144 Ngdn          | NM_026890    | 0.0084038    | 1.23605 | E11.5 * Wnt1 up vs E11.5 * Ctrl |
| 10480381 Arhgap21      | NM_001128084 | 8.63661e-006 | 1.23602 | E11.5 * Wnt1 up vs E11.5 * Ctrl |
| 10439878 Psmc1         | NM_008947    | 0.00248313   | 1.23597 | E11.5 * Wnt1 up vs E11.5 * Ctrl |
| 10534585 Sh2b2         | NM_018825    | 0.00396173   | 1.23582 | E11.5 * Wnt1 up vs E11.5 * Ctrl |
| 10363000 Gpx4          | NM_001037741 | 0.00291641   | 1.23574 | E11.5 * Wnt1 up vs E11.5 * Ctrl |
| 10429081 Snrpc         | NM_011432    | 0.00233833   | 1.23568 | E11.5 * Wnt1 up vs E11.5 * Ctrl |
| 10419810 Psmb5         | NM_011186    | 0.00146693   | 1.23521 | E11.5 * Wnt1 up vs E11.5 * Ctrl |
| 10405094 Iars          | NM_172015    | 9.62728e-005 | 1.23507 | E11.5 * Wnt1 up vs E11.5 * Ctrl |
| 10472764 Dync1i2       | NM_010064    | 0.000268209  | 1.23507 | E11.5 * Wnt1 up vs E11.5 * Ctrl |
| 10458906 Ppic          | NM_008908    | 5.67191e-005 | 1.23494 | E11.5 * Wnt1 up vs E11.5 * Ctrl |
| 10448765 Mapk8ip3      | NM_013931    | 0.000635078  | 1.23489 | E11.5 * Wnt1 up vs E11.5 * Ctrl |
| 10513397 1110054O05Rik | NM_001013577 | 0.000338346  | 1.23476 | E11.5 * Wnt1 up vs E11.5 * Ctrl |
| 10470322 Surf2         | NM_013678    | 0.000983778  | 1.23473 | E11.5 * Wnt1 up vs E11.5 * Ctrl |

|          |               |              |              |         |                                 |
|----------|---------------|--------------|--------------|---------|---------------------------------|
| 10530851 | Mtch2         | NM_019758    | 0.00588327   | 1.23457 | E11.5 * Wnt1 up vs E11.5 * Ctrl |
| 10595000 | Tmod3         | NM_016963    | 0.00840434   | 1.23416 | E11.5 * Wnt1 up vs E11.5 * Ctrl |
| 10457888 | 5730494M16Rik | NM_001004361 | 1.98655e-005 | 1.23397 | E11.5 * Wnt1 up vs E11.5 * Ctrl |
| 10558345 | Dock1         | NM_001033420 | 0.000564796  | 1.2332  | E11.5 * Wnt1 up vs E11.5 * Ctrl |
| 10549854 | Zfp28         | NM_175247    | 0.00786935   | 1.23315 | E11.5 * Wnt1 up vs E11.5 * Ctrl |
| 10346323 | 02-Mar        | NM_175439    | 0.00385958   | 1.23311 | E11.5 * Wnt1 up vs E11.5 * Ctrl |
| 10557399 | Sbk1          | NM_145587    | 0.00308834   | 1.23303 | E11.5 * Wnt1 up vs E11.5 * Ctrl |
| 10458498 | Arap3         | NM_139206    | 0.00498245   | 1.23285 | E11.5 * Wnt1 up vs E11.5 * Ctrl |
| 10602840 | Sh3kbp1       | NM_021389    | 1.165e-005   | 1.2326  | E11.5 * Wnt1 up vs E11.5 * Ctrl |
| 10392070 | Strada        | NM_028126    | 0.00888977   | 1.23257 | E11.5 * Wnt1 up vs E11.5 * Ctrl |
| 10388747 | BC017647      | ENSMUST00000 | 0.00430773   | 1.23252 | E11.5 * Wnt1 up vs E11.5 * Ctrl |
| 10594289 | Glce          | NM_033320    | 0.00252186   | 1.23183 | E11.5 * Wnt1 up vs E11.5 * Ctrl |
| 10368484 | ENSMUSG00000  | ENSMUST00000 | 0.00610006   | 1.23182 | E11.5 * Wnt1 up vs E11.5 * Ctrl |
| 10367697 | Ppp1r14c      | NM_133485    | 0.00222494   | 1.23121 | E11.5 * Wnt1 up vs E11.5 * Ctrl |
| 10582501 | Fanca         | NM_016925    | 0.00160405   | 1.23106 | E11.5 * Wnt1 up vs E11.5 * Ctrl |
| 10579825 | Pou4f2        | NM_138944    | 0.000407879  | 1.23105 | E11.5 * Wnt1 up vs E11.5 * Ctrl |
| 10358191 | Camsap1l1     | NM_001081360 | 4.22974e-005 | 1.23091 | E11.5 * Wnt1 up vs E11.5 * Ctrl |
| 10581996 | Cdyl2         | NM_029441    | 0.00395813   | 1.23075 | E11.5 * Wnt1 up vs E11.5 * Ctrl |
| 10495111 | Wdr77         | NM_027432    | 0.00122949   | 1.23066 | E11.5 * Wnt1 up vs E11.5 * Ctrl |
| 10557035 | Polr3e        | NM_025298    | 0.0049477    | 1.23059 | E11.5 * Wnt1 up vs E11.5 * Ctrl |
| 10589511 | Scap          | NM_001001144 | 0.00584338   | 1.23057 | E11.5 * Wnt1 up vs E11.5 * Ctrl |
| 10474545 | Slc12a6       | NM_133649    | 0.0017135    | 1.23039 | E11.5 * Wnt1 up vs E11.5 * Ctrl |
| 10374348 | OTTMUSG00000  | XR_032931    | 0.00162214   | 1.23029 | E11.5 * Wnt1 up vs E11.5 * Ctrl |
| 10384811 | Ccdc104       | NM_025740    | 0.00852259   | 1.23025 | E11.5 * Wnt1 up vs E11.5 * Ctrl |
| 10476668 | Csrp2bp       | NM_181417    | 0.00125074   | 1.2302  | E11.5 * Wnt1 up vs E11.5 * Ctrl |
| 10505705 | Sh3gl2        | NM_019535    | 0.00797411   | 1.23012 | E11.5 * Wnt1 up vs E11.5 * Ctrl |
| 10601760 | Hnrnp2        | NM_019868    | 0.00161537   | 1.22989 | E11.5 * Wnt1 up vs E11.5 * Ctrl |
| 10404928 | C78339        | NM_001033192 | 0.000498659  | 1.22983 | E11.5 * Wnt1 up vs E11.5 * Ctrl |
| 10518726 | Slc25a33      | NM_027460    | 0.00238571   | 1.22978 | E11.5 * Wnt1 up vs E11.5 * Ctrl |
| 10525296 | Brp           | NM_028227    | 0.000590022  | 1.22964 | E11.5 * Wnt1 up vs E11.5 * Ctrl |
| 10605929 | Awat2         | NM_177746    | 0.00650306   | 1.2295  | E11.5 * Wnt1 up vs E11.5 * Ctrl |
| 10461497 | Ddb1          | NM_015735    | 0.00620711   | 1.22935 | E11.5 * Wnt1 up vs E11.5 * Ctrl |
| 10546853 | Srgap3        | NM_080448    | 0.00498905   | 1.22921 | E11.5 * Wnt1 up vs E11.5 * Ctrl |
| 10358726 | Tsen15        | NM_025677    | 0.00527269   | 1.22918 | E11.5 * Wnt1 up vs E11.5 * Ctrl |
| 10403765 | Vps41         | NM_172120    | 0.00131044   | 1.22913 | E11.5 * Wnt1 up vs E11.5 * Ctrl |
| 10489266 | Chd6          | NM_173368    | 0.000493989  | 1.22904 | E11.5 * Wnt1 up vs E11.5 * Ctrl |
| 10550925 | Zfp428        | NM_146183    | 0.000208201  | 1.2287  | E11.5 * Wnt1 up vs E11.5 * Ctrl |
| 10382010 | Wdr68         | NM_027946    | 0.000431277  | 1.22857 | E11.5 * Wnt1 up vs E11.5 * Ctrl |
| 10510305 | Frap1         | NM_020009    | 0.00494803   | 1.2284  | E11.5 * Wnt1 up vs E11.5 * Ctrl |
| 10578619 | Cdkn2aip      | NM_172407    | 0.00306564   | 1.2282  | E11.5 * Wnt1 up vs E11.5 * Ctrl |
| 10453792 | Thoc1         | BC024951     | 0.00866956   | 1.2281  | E11.5 * Wnt1 up vs E11.5 * Ctrl |
| 10589087 | Prkar2a       | NM_008924    | 0.00646856   | 1.22797 | E11.5 * Wnt1 up vs E11.5 * Ctrl |
| 10468929 | Nmt2          | NM_008708    | 0.00390351   | 1.22773 | E11.5 * Wnt1 up vs E11.5 * Ctrl |
| 10431726 | Yaf2          | NM_024189    | 0.000795096  | 1.22762 | E11.5 * Wnt1 up vs E11.5 * Ctrl |
| 10426016 | Gtse1         | NM_013882    | 0.00260188   | 1.22743 | E11.5 * Wnt1 up vs E11.5 * Ctrl |
| 10438517 | Alg3          | NM_145939    | 0.00461496   | 1.22729 | E11.5 * Wnt1 up vs E11.5 * Ctrl |
| 10603373 | Pqbp1         | NM_019478    | 0.00198887   | 1.22721 | E11.5 * Wnt1 up vs E11.5 * Ctrl |
| 10489065 | Ndr3          | NM_013865    | 0.00255716   | 1.22719 | E11.5 * Wnt1 up vs E11.5 * Ctrl |
| 10364728 | Mum1          | NM_023431    | 0.00302476   | 1.22698 | E11.5 * Wnt1 up vs E11.5 * Ctrl |
| 10364955 | Thop1         | NM_022653    | 0.0080032    | 1.22679 | E11.5 * Wnt1 up vs E11.5 * Ctrl |
| 10448593 | Traf7         | NM_153792    | 0.00242642   | 1.22651 | E11.5 * Wnt1 up vs E11.5 * Ctrl |
| 10448292 | Thoc6         | NM_001008425 | 0.00432532   | 1.22561 | E11.5 * Wnt1 up vs E11.5 * Ctrl |
| 10586477 | Ppib          | NM_011149    | 0.000537239  | 1.22556 | E11.5 * Wnt1 up vs E11.5 * Ctrl |
| 10457780 | Fam59a        | NM_001033445 | 0.00728391   | 1.22534 | E11.5 * Wnt1 up vs E11.5 * Ctrl |
| 10418171 | Zcchc24       | NM_001101433 | 0.00779462   | 1.22518 | E11.5 * Wnt1 up vs E11.5 * Ctrl |
| 10558903 | Taldo1        | NM_011528    | 0.00504626   | 1.22515 | E11.5 * Wnt1 up vs E11.5 * Ctrl |
| 10418578 | Nisch         | NM_022656    | 0.000782354  | 1.22489 | E11.5 * Wnt1 up vs E11.5 * Ctrl |
| 10591497 | Kri1          | NM_145416    | 0.00803663   | 1.22482 | E11.5 * Wnt1 up vs E11.5 * Ctrl |
| 10345666 | Pdcl3         | NM_026850    | 0.00217445   | 1.22416 | E11.5 * Wnt1 up vs E11.5 * Ctrl |
| 10601390 | Pgk1          | NM_008828    | 4.299e-006   | 1.22396 | E11.5 * Wnt1 up vs E11.5 * Ctrl |
| 10418796 | Dph3          | NM_172254    | 0.000627497  | 1.22352 | E11.5 * Wnt1 up vs E11.5 * Ctrl |
| 10489784 | Prex1         | NM_177782    | 0.000582772  | 1.22334 | E11.5 * Wnt1 up vs E11.5 * Ctrl |
| 10520025 | Psmc2         | NM_011188    | 1.3476e-005  | 1.22325 | E11.5 * Wnt1 up vs E11.5 * Ctrl |
| 10375079 | Ubd2          | NM_173784    | 0.000924758  | 1.22324 | E11.5 * Wnt1 up vs E11.5 * Ctrl |
| 10557139 | Ubf1          | NM_138589    | 0.00828181   | 1.22305 | E11.5 * Wnt1 up vs E11.5 * Ctrl |
| 10419825 | Acin1         | NM_023190    | 0.00217435   | 1.22303 | E11.5 * Wnt1 up vs E11.5 * Ctrl |

|          |               |              |              |         |                                 |
|----------|---------------|--------------|--------------|---------|---------------------------------|
| 10457054 | Zadh2         | NM_146090    | 0.00869444   | 1.22268 | E11.5 * Wnt1 up vs E11.5 * Ctrl |
| 10455989 | Rbm22         | NM_025776    | 0.000390741  | 1.22204 | E11.5 * Wnt1 up vs E11.5 * Ctrl |
| 10605919 | Pja1          | NM_001083110 | 4.79763e-005 | 1.22201 | E11.5 * Wnt1 up vs E11.5 * Ctrl |
| 10369290 | Ddit4         | NM_029083    | 0.000705593  | 1.22197 | E11.5 * Wnt1 up vs E11.5 * Ctrl |
| 10458804 | EG225468      | XM_911153    | 0.00319996   | 1.2218  | E11.5 * Wnt1 up vs E11.5 * Ctrl |
| 10467941 | Cwf19l1       | NM_001081077 | 0.00564041   | 1.22172 | E11.5 * Wnt1 up vs E11.5 * Ctrl |
| 10470936 | Tbc1d13       | NM_146252    | 0.00103026   | 1.22147 | E11.5 * Wnt1 up vs E11.5 * Ctrl |
| 10493565 | Adar          | NM_001038587 | 0.000163245  | 1.22142 | E11.5 * Wnt1 up vs E11.5 * Ctrl |
| 10502522 | Hs2st1        | NM_011828    | 5.15325e-006 | 1.22137 | E11.5 * Wnt1 up vs E11.5 * Ctrl |
| 10502058 | BC002199      | NM_145964    | 0.000111179  | 1.22084 | E11.5 * Wnt1 up vs E11.5 * Ctrl |
| 10449386 | D17Wsu92e     | NM_001033279 | 0.000658964  | 1.22077 | E11.5 * Wnt1 up vs E11.5 * Ctrl |
| 10381668 | Nmt1          | NM_008707    | 0.000578992  | 1.22075 | E11.5 * Wnt1 up vs E11.5 * Ctrl |
| 10546113 | Sec61a1       | NM_016906    | 0.000263827  | 1.22066 | E11.5 * Wnt1 up vs E11.5 * Ctrl |
| 10471438 | Dpm2          | NM_010073    | 0.00415537   | 1.2205  | E11.5 * Wnt1 up vs E11.5 * Ctrl |
| 10533007 | Ccdc64        | NM_001080808 | 0.00134878   | 1.22049 | E11.5 * Wnt1 up vs E11.5 * Ctrl |
| 10414623 | E130112L23Rik | NM_198249    | 0.00269978   | 1.22015 | E11.5 * Wnt1 up vs E11.5 * Ctrl |
| 10541002 | D6Wsu116e     | BC056942     | 0.00227313   | 1.21974 | E11.5 * Wnt1 up vs E11.5 * Ctrl |
| 10375667 | Rnf130        | NM_021540    | 0.00861566   | 1.21967 | E11.5 * Wnt1 up vs E11.5 * Ctrl |
| 10481634 | Slc25a25      | NM_146118    | 0.00323007   | 1.21964 | E11.5 * Wnt1 up vs E11.5 * Ctrl |
| 10587012 | Ccpg1         | NM_001114328 | 0.0056041    | 1.21957 | E11.5 * Wnt1 up vs E11.5 * Ctrl |
| 10379901 | Bcas3         | NM_138681    | 0.00454436   | 1.21951 | E11.5 * Wnt1 up vs E11.5 * Ctrl |
| 10384672 | Ahsa2         | NM_172391    | 0.000718063  | 1.21944 | E11.5 * Wnt1 up vs E11.5 * Ctrl |
| 10605512 | LOC636082     | ENSMUST00000 | 0.000859334  | 1.21858 | E11.5 * Wnt1 up vs E11.5 * Ctrl |
| 10431229 | Celsr1        | NM_009886    | 0.00310412   | 1.21851 | E11.5 * Wnt1 up vs E11.5 * Ctrl |
| 10427910 | Fam105b       | NM_001013792 | 0.00834665   | 1.21839 | E11.5 * Wnt1 up vs E11.5 * Ctrl |
| 10602062 | Prps1         | NM_021463    | 0.00770971   | 1.21835 | E11.5 * Wnt1 up vs E11.5 * Ctrl |
| 10407513 | Wdr37         | NM_172445    | 0.00602605   | 1.21746 | E11.5 * Wnt1 up vs E11.5 * Ctrl |
| 10563583 | Saal1         | NM_030233    | 0.00372334   | 1.21723 | E11.5 * Wnt1 up vs E11.5 * Ctrl |
| 10488482 | Acss1         | NM_080575    | 0.00262132   | 1.2171  | E11.5 * Wnt1 up vs E11.5 * Ctrl |
| 10510814 | BC046331      | NM_177673    | 0.00618281   | 1.21651 | E11.5 * Wnt1 up vs E11.5 * Ctrl |
| 10360884 | Iars2         | NM_198653    | 0.00255177   | 1.21639 | E11.5 * Wnt1 up vs E11.5 * Ctrl |
| 10550022 | Psip1         | NM_133948    | 0.000242005  | 1.21637 | E11.5 * Wnt1 up vs E11.5 * Ctrl |
| 10425354 | Mgat3         | NM_010795    | 0.000871268  | 1.21633 | E11.5 * Wnt1 up vs E11.5 * Ctrl |
| 10449394 | Taf11         | NM_026836    | 0.000292244  | 1.21618 | E11.5 * Wnt1 up vs E11.5 * Ctrl |
| 10479649 | Prpf6         | NM_133701    | 0.000395621  | 1.21616 | E11.5 * Wnt1 up vs E11.5 * Ctrl |
| 10486552 | Lrrc57        | NM_001159612 | 0.00187009   | 1.2161  | E11.5 * Wnt1 up vs E11.5 * Ctrl |
| 10569771 | Mcoln1        | NM_053177    | 0.00308219   | 1.21568 | E11.5 * Wnt1 up vs E11.5 * Ctrl |
| 10389421 | Ints2         | NM_027421    | 0.00167465   | 1.21567 | E11.5 * Wnt1 up vs E11.5 * Ctrl |
| 10494662 | Ywhah         | NM_011738    | 0.00027219   | 1.21565 | E11.5 * Wnt1 up vs E11.5 * Ctrl |
| 10541711 | Phb2          | NM_007531    | 0.00246885   | 1.21543 | E11.5 * Wnt1 up vs E11.5 * Ctrl |
| 10349512 | Ubxn4         | NM_026390    | 5.63295e-005 | 1.21543 | E11.5 * Wnt1 up vs E11.5 * Ctrl |
| 10582295 | Odc1          | NM_013614    | 0.00339249   | 1.2152  | E11.5 * Wnt1 up vs E11.5 * Ctrl |
| 10492078 | Alg5          | NM_025442    | 0.00370554   | 1.21445 | E11.5 * Wnt1 up vs E11.5 * Ctrl |
| 10388625 | Efcab5        | NM_176965    | 0.00690477   | 1.2143  | E11.5 * Wnt1 up vs E11.5 * Ctrl |
| 10529313 | Letm1         | NM_019694    | 0.00305345   | 1.21406 | E11.5 * Wnt1 up vs E11.5 * Ctrl |
| 10512098 | Aptx          | NM_025545    | 0.00880799   | 1.21405 | E11.5 * Wnt1 up vs E11.5 * Ctrl |
| 10582699 | 2810004N23Rik | NM_025615    | 0.00370025   | 1.21369 | E11.5 * Wnt1 up vs E11.5 * Ctrl |
| 10427162 | Mfsd5         | NM_134100    | 0.00145034   | 1.21363 | E11.5 * Wnt1 up vs E11.5 * Ctrl |
| 10363599 | Rufy2         | NM_027425    | 0.00632092   | 1.2136  | E11.5 * Wnt1 up vs E11.5 * Ctrl |
| 10451918 | Ubxn6         | NM_024432    | 0.000635007  | 1.21333 | E11.5 * Wnt1 up vs E11.5 * Ctrl |
| 10550345 | Strn4         | NM_133789    | 0.00313806   | 1.21309 | E11.5 * Wnt1 up vs E11.5 * Ctrl |
| 10604922 | BC023829      | NM_001033328 | 0.00344325   | 1.21292 | E11.5 * Wnt1 up vs E11.5 * Ctrl |
| 10401713 | Pomt2         | NM_153415    | 0.00234724   | 1.21282 | E11.5 * Wnt1 up vs E11.5 * Ctrl |
| 10497090 | Ankrd13c      | NM_001013806 | 0.00231536   | 1.21275 | E11.5 * Wnt1 up vs E11.5 * Ctrl |
| 10407543 | Gtpbp4        | NM_027000    | 0.000447661  | 1.21271 | E11.5 * Wnt1 up vs E11.5 * Ctrl |
| 10423185 | Rnasen        | NM_001130149 | 0.00451688   | 1.21262 | E11.5 * Wnt1 up vs E11.5 * Ctrl |
| 10485225 | Ext2          | NM_010163    | 0.00654061   | 1.21262 | E11.5 * Wnt1 up vs E11.5 * Ctrl |
| 10363706 | Jmjd1c        | NM_207221    | 0.00361565   | 1.21261 | E11.5 * Wnt1 up vs E11.5 * Ctrl |
| 10520234 | 2010209O12Rik | NM_133913    | 0.000291357  | 1.21238 | E11.5 * Wnt1 up vs E11.5 * Ctrl |
| 10539669 | Add2          | NM_013458    | 0.0010789    | 1.21232 | E11.5 * Wnt1 up vs E11.5 * Ctrl |
| 10459930 | Ctdp1         | NM_026295    | 0.00305376   | 1.21194 | E11.5 * Wnt1 up vs E11.5 * Ctrl |
| 10400326 | Eapp          | NM_025456    | 0.00700572   | 1.21176 | E11.5 * Wnt1 up vs E11.5 * Ctrl |
| 10372583 | Rab3ip        | NM_001003950 | 0.000926295  | 1.21152 | E11.5 * Wnt1 up vs E11.5 * Ctrl |
| 10537078 | Mkin1         | NM_013791    | 0.000556805  | 1.21146 | E11.5 * Wnt1 up vs E11.5 * Ctrl |
| 10526250 | Abhd11        | NM_145215    | 0.00309211   | 1.2109  | E11.5 * Wnt1 up vs E11.5 * Ctrl |
| 10482330 | Atp6v1g1      | NM_024173    | 0.00183624   | 1.21076 | E11.5 * Wnt1 up vs E11.5 * Ctrl |

|          |               |              |              |         |                                 |
|----------|---------------|--------------|--------------|---------|---------------------------------|
| 10360270 | Atp1a2        | NM_178405    | 0.000818349  | 1.21066 | E11.5 * Wnt1 up vs E11.5 * Ctrl |
| 10573348 | Cacna1a       | NM_007578    | 0.00850918   | 1.2106  | E11.5 * Wnt1 up vs E11.5 * Ctrl |
| 10545780 | Exoc6b        | NM_177077    | 0.00434284   | 1.21054 | E11.5 * Wnt1 up vs E11.5 * Ctrl |
| 10356800 | Hdlbp         | NM_133808    | 4.43172e-006 | 1.21043 | E11.5 * Wnt1 up vs E11.5 * Ctrl |
| 10401805 | Snw1          | NM_025507    | 0.000150911  | 1.21008 | E11.5 * Wnt1 up vs E11.5 * Ctrl |
| 10582599 | Nup133        | NM_172288    | 0.0044779    | 1.20978 | E11.5 * Wnt1 up vs E11.5 * Ctrl |
| 10555695 | Rrm1          | NM_009103    | 0.000141076  | 1.20947 | E11.5 * Wnt1 up vs E11.5 * Ctrl |
| 10428238 | Ubr5          | NM_001081359 | 0.000930135  | 1.20945 | E11.5 * Wnt1 up vs E11.5 * Ctrl |
| 10460085 | Cndp2         | NM_023149    | 0.00113655   | 1.20933 | E11.5 * Wnt1 up vs E11.5 * Ctrl |
| 10546586 | Tmf1          | NM_001081111 | 0.00695663   | 1.20933 | E11.5 * Wnt1 up vs E11.5 * Ctrl |
| 10521031 | Ywhah         | NM_011738    | 0.00233788   | 1.20932 | E11.5 * Wnt1 up vs E11.5 * Ctrl |
| 10527732 | Fry           | ENSMUST00000 | 0.00505056   | 1.20893 | E11.5 * Wnt1 up vs E11.5 * Ctrl |
| 10442870 | Ccdc78        | ENSMUST00000 | 0.00560039   | 1.20882 | E11.5 * Wnt1 up vs E11.5 * Ctrl |
| 10479765 | Suv39h2       | NM_022724    | 0.000835163  | 1.20866 | E11.5 * Wnt1 up vs E11.5 * Ctrl |
| 10413795 | Eaf1          | NM_028932    | 0.000135631  | 1.20858 | E11.5 * Wnt1 up vs E11.5 * Ctrl |
| 10493585 | Ube2q1        | NM_027315    | 0.00157769   | 1.20853 | E11.5 * Wnt1 up vs E11.5 * Ctrl |
| 10535629 | Pdap1         | NM_001033313 | 0.00136779   | 1.20824 | E11.5 * Wnt1 up vs E11.5 * Ctrl |
| 10490773 | Hnrnp2        | NM_019868    | 0.00465139   | 1.2082  | E11.5 * Wnt1 up vs E11.5 * Ctrl |
| 10392936 | Nt5c          | NM_015807    | 0.00249102   | 1.20818 | E11.5 * Wnt1 up vs E11.5 * Ctrl |
| 10431266 | Cerk          | NM_145475    | 0.00376839   | 1.20799 | E11.5 * Wnt1 up vs E11.5 * Ctrl |
| 10375234 | Nudcd2        | NM_026023    | 0.000127488  | 1.20773 | E11.5 * Wnt1 up vs E11.5 * Ctrl |
| 10358717 | 1700025G04Rik | BC034723     | 0.000587718  | 1.20766 | E11.5 * Wnt1 up vs E11.5 * Ctrl |
| 10591270 | Olfm2         | NM_173777    | 0.00160211   | 1.20754 | E11.5 * Wnt1 up vs E11.5 * Ctrl |
| 10532187 | Gak           | NM_153569    | 0.000650122  | 1.20754 | E11.5 * Wnt1 up vs E11.5 * Ctrl |
| 10564849 | 2610034B18Rik | NM_027420    | 0.00205003   | 1.20741 | E11.5 * Wnt1 up vs E11.5 * Ctrl |
| 10380524 | Slc35b1       | NM_016752    | 0.000427791  | 1.20711 | E11.5 * Wnt1 up vs E11.5 * Ctrl |
| 10455533 | Eif1a         | NM_010120    | 0.00835789   | 1.20696 | E11.5 * Wnt1 up vs E11.5 * Ctrl |
| 10493247 | Ubqln4        | NM_033526    | 0.00371823   | 1.20651 | E11.5 * Wnt1 up vs E11.5 * Ctrl |
| 10359097 | Tor1aip1      | NM_144791    | 0.00300312   | 1.20621 | E11.5 * Wnt1 up vs E11.5 * Ctrl |
| 10456995 | Txn14a        | NM_178604    | 0.00212594   | 1.20619 | E11.5 * Wnt1 up vs E11.5 * Ctrl |
| 10535282 | Card11        | NM_175362    | 0.00759838   | 1.20595 | E11.5 * Wnt1 up vs E11.5 * Ctrl |
| 10361828 | Cited2        | NM_010828    | 0.00862944   | 1.20588 | E11.5 * Wnt1 up vs E11.5 * Ctrl |
| 10511113 | Cdc2l1        | NM_007661    | 6.74105e-005 | 1.20581 | E11.5 * Wnt1 up vs E11.5 * Ctrl |
| 10401244 | Actn1         | NM_134156    | 0.00356881   | 1.20542 | E11.5 * Wnt1 up vs E11.5 * Ctrl |
| 10418218 | Slmap         | NM_032008    | 0.00136845   | 1.20517 | E11.5 * Wnt1 up vs E11.5 * Ctrl |
| 10426098 | Creld2        | NM_029720    | 0.000472308  | 1.20502 | E11.5 * Wnt1 up vs E11.5 * Ctrl |
| 10428232 | Rrm2b         | NM_199476    | 0.00768056   | 1.20488 | E11.5 * Wnt1 up vs E11.5 * Ctrl |
| 10573637 | Phkb          | NM_199446    | 0.00211033   | 1.20477 | E11.5 * Wnt1 up vs E11.5 * Ctrl |
| 10458913 | Cep120        | NM_178686    | 0.00618566   | 1.2045  | E11.5 * Wnt1 up vs E11.5 * Ctrl |
| 10394040 | Csnk1d        | NM_027874    | 0.00465684   | 1.2045  | E11.5 * Wnt1 up vs E11.5 * Ctrl |
| 10550734 | Tomm40        | NM_001109748 | 0.000418817  | 1.20425 | E11.5 * Wnt1 up vs E11.5 * Ctrl |
| 10369301 | Chst3         | NM_016803    | 0.00640252   | 1.20361 | E11.5 * Wnt1 up vs E11.5 * Ctrl |
| 10426292 | Alg10b        | NM_001033441 | 0.00584204   | 1.20342 | E11.5 * Wnt1 up vs E11.5 * Ctrl |
| 10424370 | Trib1         | NM_144549    | 0.00665085   | 1.20341 | E11.5 * Wnt1 up vs E11.5 * Ctrl |
| 10447589 | Fbl           | NM_007991    | 0.00144299   | 1.20335 | E11.5 * Wnt1 up vs E11.5 * Ctrl |
| 10376690 | Ligl1         | NM_008502    | 0.00886232   | 1.20286 | E11.5 * Wnt1 up vs E11.5 * Ctrl |
| 10461334 | Mta2          | NM_011842    | 0.0014844    | 1.20269 | E11.5 * Wnt1 up vs E11.5 * Ctrl |
| 10478772 | Arfgef2       | NM_001085495 | 0.00625569   | 1.20217 | E11.5 * Wnt1 up vs E11.5 * Ctrl |
| 10517312 | Tmem57        | NM_025382    | 0.00522049   | 1.20215 | E11.5 * Wnt1 up vs E11.5 * Ctrl |
| 10585037 | Bud13         | NM_146000    | 0.0059598    | 1.20208 | E11.5 * Wnt1 up vs E11.5 * Ctrl |
| 10473281 | Itgav         | NM_008402    | 0.00587249   | 1.2019  | E11.5 * Wnt1 up vs E11.5 * Ctrl |
| 10591369 | Dnmt1         | NM_010066    | 0.000644718  | 1.20138 | E11.5 * Wnt1 up vs E11.5 * Ctrl |
| 10426477 | Snrpc         | NM_011432    | 0.00359765   | 1.20134 | E11.5 * Wnt1 up vs E11.5 * Ctrl |
| 10429972 | Cpsf1         | NM_053193    | 0.000510051  | 1.20128 | E11.5 * Wnt1 up vs E11.5 * Ctrl |
| 10571288 | Gtf2e2        | NM_026584    | 0.0010607    | 1.20112 | E11.5 * Wnt1 up vs E11.5 * Ctrl |
| 10559513 | Cab39         | NM_133781    | 0.00259009   | 1.20093 | E11.5 * Wnt1 up vs E11.5 * Ctrl |
| 10480035 | Pfkfb3        | NM_133232    | 0.00445789   | 1.20082 | E11.5 * Wnt1 up vs E11.5 * Ctrl |
| 10471608 | Cep110        | NM_012018    | 0.00332914   | 1.20077 | E11.5 * Wnt1 up vs E11.5 * Ctrl |
| 10390271 | Nfe2l1        | NM_008686    | 0.00815154   | 1.20064 | E11.5 * Wnt1 up vs E11.5 * Ctrl |
| 10347460 | Ttll4         | NM_001014974 | 0.000243026  | 1.20035 | E11.5 * Wnt1 up vs E11.5 * Ctrl |
| 10388786 | Supt6h        | NM_009297    | 0.000692748  | 1.20019 | E11.5 * Wnt1 up vs E11.5 * Ctrl |
| 10415574 | Ccni          | NM_017367    | 0.00110269   | 1.2001  | E11.5 * Wnt1 up vs E11.5 * Ctrl |
| 10352348 | Cnih4         | NM_030131    | 0.00228815   | 1.20009 | E11.5 * Wnt1 up vs E11.5 * Ctrl |
| 10360934 | Rrp15         | NM_026041    | 0.00265899   | 1.20001 | E11.5 * Wnt1 up vs E11.5 * Ctrl |
| 10507933 | Inpp5b        | NM_008385    | 0.00270109   | 1.19992 | E11.5 * Wnt1 up vs E11.5 * Ctrl |
| 10510624 | Klhl21        | NM_001033352 | 0.00207933   | 1.19981 | E11.5 * Wnt1 up vs E11.5 * Ctrl |

|          |               |              |             |         |                                 |
|----------|---------------|--------------|-------------|---------|---------------------------------|
| 10607724 | Zrsr2         | NM_178794    | 0.00220326  | 1.19844 | E11.5 * Wnt1 up vs E11.5 * Ctrl |
| 10348817 | 02-Sep        | NM_001159719 | 0.00315001  | 1.19844 | E11.5 * Wnt1 up vs E11.5 * Ctrl |
| 10373924 | Ascc2         | NM_029291    | 0.0011384   | 1.1984  | E11.5 * Wnt1 up vs E11.5 * Ctrl |
| 10572637 | Fam125a       | NM_028617    | 0.00846534  | 1.19822 | E11.5 * Wnt1 up vs E11.5 * Ctrl |
| 10347163 | Spag16        | NM_029160    | 0.000183437 | 1.19816 | E11.5 * Wnt1 up vs E11.5 * Ctrl |
| 10503448 | Mmp16         | NM_019724    | 0.00206564  | 1.19812 | E11.5 * Wnt1 up vs E11.5 * Ctrl |
| 10385343 | Ttc1          | NM_133795    | 0.00161758  | 1.19792 | E11.5 * Wnt1 up vs E11.5 * Ctrl |
| 10569898 | Evi5l         | NM_001039578 | 0.00099904  | 1.19754 | E11.5 * Wnt1 up vs E11.5 * Ctrl |
| 10533327 | Mapkapk5      | NM_010765    | 0.00246274  | 1.19703 | E11.5 * Wnt1 up vs E11.5 * Ctrl |
| 10521136 | Whsc1         | NM_001081102 | 0.000880552 | 1.19696 | E11.5 * Wnt1 up vs E11.5 * Ctrl |
| 10345913 | Nck2          | NM_010879    | 0.00845988  | 1.19671 | E11.5 * Wnt1 up vs E11.5 * Ctrl |
| 10555550 | Clpb          | NM_009191    | 0.00252772  | 1.19615 | E11.5 * Wnt1 up vs E11.5 * Ctrl |
| 10579219 | Ddx49         | NM_001024922 | 0.00697052  | 1.19613 | E11.5 * Wnt1 up vs E11.5 * Ctrl |
| 10560842 | Zfp94         | NM_009568    | 0.00283754  | 1.19599 | E11.5 * Wnt1 up vs E11.5 * Ctrl |
| 10568956 | Olfr60        | NM_146955    | 0.00613699  | 1.19555 | E11.5 * Wnt1 up vs E11.5 * Ctrl |
| 10583942 | Thyn1         | NM_144543    | 0.00191089  | 1.19554 | E11.5 * Wnt1 up vs E11.5 * Ctrl |
| 10543835 | Chchd3        | NM_025336    | 0.00626632  | 1.19534 | E11.5 * Wnt1 up vs E11.5 * Ctrl |
| 10446044 | Hdgfrp2       | NM_008233    | 0.00260603  | 1.19493 | E11.5 * Wnt1 up vs E11.5 * Ctrl |
| 10457489 | 6030446N20Rik | BC094382     | 0.00379219  | 1.19491 | E11.5 * Wnt1 up vs E11.5 * Ctrl |
| 10383545 | Foxk2         | NM_001080932 | 0.00164082  | 1.19476 | E11.5 * Wnt1 up vs E11.5 * Ctrl |
| 10530215 | 1110003E01Rik | NM_133697    | 0.00672948  | 1.1946  | E11.5 * Wnt1 up vs E11.5 * Ctrl |
| 10460706 | Synn1         | NM_028769    | 0.00486058  | 1.19445 | E11.5 * Wnt1 up vs E11.5 * Ctrl |
| 10399121 | Ptpn2         | NM_011215    | 0.00743132  | 1.19442 | E11.5 * Wnt1 up vs E11.5 * Ctrl |
| 10452087 | Safb2         | NM_001029979 | 0.00808021  | 1.19421 | E11.5 * Wnt1 up vs E11.5 * Ctrl |
| 10503845 | Ube2j1        | NM_019586    | 0.00789836  | 1.19417 | E11.5 * Wnt1 up vs E11.5 * Ctrl |
| 10447695 | ---           | ---          | 0.00108571  | 1.19386 | E11.5 * Wnt1 up vs E11.5 * Ctrl |
| 10498837 | Etfdh         | NM_025794    | 0.000124377 | 1.19365 | E11.5 * Wnt1 up vs E11.5 * Ctrl |
| 10494857 | Nras          | NM_010937    | 0.000528795 | 1.19364 | E11.5 * Wnt1 up vs E11.5 * Ctrl |
| 10380641 | Hoxb5         | NM_008268    | 0.00169148  | 1.19344 | E11.5 * Wnt1 up vs E11.5 * Ctrl |
| 10507557 | Ebna1bp2      | NM_026932    | 0.00239744  | 1.19268 | E11.5 * Wnt1 up vs E11.5 * Ctrl |
| 10373439 | Zc3h10        | NM_134003    | 0.00550173  | 1.19266 | E11.5 * Wnt1 up vs E11.5 * Ctrl |
| 10389865 | Nme1          | NM_008704    | 0.000102739 | 1.19246 | E11.5 * Wnt1 up vs E11.5 * Ctrl |
| 10460112 | ---           | ---          | 0.00688219  | 1.19239 | E11.5 * Wnt1 up vs E11.5 * Ctrl |
| 10367292 | Cs            | NM_026444    | 0.0030281   | 1.19234 | E11.5 * Wnt1 up vs E11.5 * Ctrl |
| 10488862 | Ggt7          | NM_144786    | 0.00329089  | 1.19225 | E11.5 * Wnt1 up vs E11.5 * Ctrl |
| 10348180 | Eif4e2        | NM_001039169 | 0.00774638  | 1.19215 | E11.5 * Wnt1 up vs E11.5 * Ctrl |
| 10555108 | Clns1a        | NM_023671    | 0.000358648 | 1.19213 | E11.5 * Wnt1 up vs E11.5 * Ctrl |
| 10365297 | D10Wsu102e    | BC094241     | 0.00491803  | 1.1918  | E11.5 * Wnt1 up vs E11.5 * Ctrl |
| 10476207 | Atrn          | NM_009730    | 0.00464889  | 1.19164 | E11.5 * Wnt1 up vs E11.5 * Ctrl |
| 10511084 | Nadk          | NM_138671    | 0.00865828  | 1.19157 | E11.5 * Wnt1 up vs E11.5 * Ctrl |
| 10379891 | Ppm1d         | NM_016910    | 0.00455529  | 1.19141 | E11.5 * Wnt1 up vs E11.5 * Ctrl |
| 10495243 | Gstm5         | NM_010360    | 0.00270155  | 1.19091 | E11.5 * Wnt1 up vs E11.5 * Ctrl |
| 10605740 | Eif2s3x       | NM_012010    | 0.00551909  | 1.19087 | E11.5 * Wnt1 up vs E11.5 * Ctrl |
| 10463557 | Gbf1          | NM_178930    | 0.000442168 | 1.19077 | E11.5 * Wnt1 up vs E11.5 * Ctrl |
| 10377550 | Trp53         | NM_001127233 | 0.00237326  | 1.19065 | E11.5 * Wnt1 up vs E11.5 * Ctrl |
| 10386495 | Tom12         | NM_153080    | 0.00248932  | 1.19035 | E11.5 * Wnt1 up vs E11.5 * Ctrl |
| 10522606 | Exoc1         | NM_027270    | 0.0065261   | 1.19032 | E11.5 * Wnt1 up vs E11.5 * Ctrl |
| 10387625 | Chrnbl        | NM_009601    | 0.00143959  | 1.19014 | E11.5 * Wnt1 up vs E11.5 * Ctrl |
| 10503401 | Tmem55a       | NM_028264    | 0.000969193 | 1.18972 | E11.5 * Wnt1 up vs E11.5 * Ctrl |
| 10425161 | Lgals1        | NM_008495    | 0.00160343  | 1.18939 | E11.5 * Wnt1 up vs E11.5 * Ctrl |
| 10525555 | Mlxip         | NM_133917    | 0.00157446  | 1.18912 | E11.5 * Wnt1 up vs E11.5 * Ctrl |
| 10454298 | Zfp397        | NM_027007    | 0.000516167 | 1.18877 | E11.5 * Wnt1 up vs E11.5 * Ctrl |
| 10470268 | Pmpca         | NM_173180    | 0.0032124   | 1.18876 | E11.5 * Wnt1 up vs E11.5 * Ctrl |
| 10593103 | Rnf214        | NM_178709    | 0.00508128  | 1.18845 | E11.5 * Wnt1 up vs E11.5 * Ctrl |
| 10453512 | Kpna2         | NM_010655    | 0.00855861  | 1.18817 | E11.5 * Wnt1 up vs E11.5 * Ctrl |
| 10456194 | Napg          | NM_028017    | 0.00265136  | 1.18814 | E11.5 * Wnt1 up vs E11.5 * Ctrl |
| 10546066 | Isy1          | NM_133934    | 0.00571142  | 1.18798 | E11.5 * Wnt1 up vs E11.5 * Ctrl |
| 10580309 | 1500041N16Rik | NM_026399    | 0.00740304  | 1.18796 | E11.5 * Wnt1 up vs E11.5 * Ctrl |
| 10457961 | Sft2d3        | ENSMUST00000 | 0.00607214  | 1.18778 | E11.5 * Wnt1 up vs E11.5 * Ctrl |
| 10498038 | Elf2          | NM_023502    | 0.00354963  | 1.18777 | E11.5 * Wnt1 up vs E11.5 * Ctrl |
| 10529287 | Fam53a        | NM_178390    | 0.0049738   | 1.18768 | E11.5 * Wnt1 up vs E11.5 * Ctrl |
| 10382139 | Psmc12        | NM_025894    | 6.9069e-006 | 1.18762 | E11.5 * Wnt1 up vs E11.5 * Ctrl |
| 10541803 | Chd4          | NM_145979    | 0.00102872  | 1.18749 | E11.5 * Wnt1 up vs E11.5 * Ctrl |
| 10502537 | Sh3glb1       | NM_019464    | 0.00013953  | 1.18748 | E11.5 * Wnt1 up vs E11.5 * Ctrl |
| 10358057 | Shisa4        | NM_175259    | 0.000964513 | 1.18745 | E11.5 * Wnt1 up vs E11.5 * Ctrl |
| 10542310 | Cdkn1b        | NM_009875    | 0.00611129  | 1.18736 | E11.5 * Wnt1 up vs E11.5 * Ctrl |

|          |               |              |              |         |                                 |
|----------|---------------|--------------|--------------|---------|---------------------------------|
| 10516658 | Ccdc28b       | NM_025455    | 0.00239488   | 1.18726 | E11.5 * Wnt1 up vs E11.5 * Ctrl |
| 10574184 | Rspry1        | NM_026274    | 0.00710045   | 1.18716 | E11.5 * Wnt1 up vs E11.5 * Ctrl |
| 10348558 | Scly          | NM_016717    | 0.0059221    | 1.1869  | E11.5 * Wnt1 up vs E11.5 * Ctrl |
| 10409645 | Ubqln1        | NM_152234    | 0.00032306   | 1.18676 | E11.5 * Wnt1 up vs E11.5 * Ctrl |
| 10384183 | AB182283      | NM_001081652 | 0.00287591   | 1.18671 | E11.5 * Wnt1 up vs E11.5 * Ctrl |
| 10401172 | Vti1b         | NM_016800    | 0.000793097  | 1.18667 | E11.5 * Wnt1 up vs E11.5 * Ctrl |
| 10499705 | Hax1          | NM_011826    | 0.00346279   | 1.18656 | E11.5 * Wnt1 up vs E11.5 * Ctrl |
| 10571653 | Actg1         | NM_009609    | 0.000404192  | 1.18647 | E11.5 * Wnt1 up vs E11.5 * Ctrl |
| 10592701 | Tmem136       | NM_001034863 | 0.00773861   | 1.18645 | E11.5 * Wnt1 up vs E11.5 * Ctrl |
| 10487154 | Secisbp2l     | NM_177608    | 0.00281744   | 1.18632 | E11.5 * Wnt1 up vs E11.5 * Ctrl |
| 10452937 | Heatr5b       | NM_001081179 | 0.00387632   | 1.18626 | E11.5 * Wnt1 up vs E11.5 * Ctrl |
| 10405971 | Nsun2         | NM_145354    | 0.000336895  | 1.18609 | E11.5 * Wnt1 up vs E11.5 * Ctrl |
| 10389269 | Aatf          | NM_019816    | 0.00378677   | 1.18602 | E11.5 * Wnt1 up vs E11.5 * Ctrl |
| 10560630 | Tomm40        | NM_001109748 | 0.00198305   | 1.18602 | E11.5 * Wnt1 up vs E11.5 * Ctrl |
| 10551469 | Dyrk1b        | NM_001037957 | 0.0077658    | 1.18593 | E11.5 * Wnt1 up vs E11.5 * Ctrl |
| 10402841 | Brf1          | NM_028193    | 0.00822864   | 1.18593 | E11.5 * Wnt1 up vs E11.5 * Ctrl |
| 10406881 | Smn1          | NM_011420    | 0.00791893   | 1.18582 | E11.5 * Wnt1 up vs E11.5 * Ctrl |
| 10388971 | Utp6          | NM_144826    | 0.00183077   | 1.18561 | E11.5 * Wnt1 up vs E11.5 * Ctrl |
| 10365830 | ---           | ---          | 0.00536238   | 1.18539 | E11.5 * Wnt1 up vs E11.5 * Ctrl |
| 10422608 | Oxct1         | NM_024188    | 2.17976e-005 | 1.18535 | E11.5 * Wnt1 up vs E11.5 * Ctrl |
| 10600765 | Pcyt1b        | NM_211138    | 0.0087403    | 1.18529 | E11.5 * Wnt1 up vs E11.5 * Ctrl |
| 10496742 | 2410004B18Rik | NM_025555    | 0.00648202   | 1.1852  | E11.5 * Wnt1 up vs E11.5 * Ctrl |
| 10546805 | Ddx18         | NM_025860    | 0.00574399   | 1.18501 | E11.5 * Wnt1 up vs E11.5 * Ctrl |
| 10352066 | Sdccag8       | NM_029756    | 0.00675286   | 1.18499 | E11.5 * Wnt1 up vs E11.5 * Ctrl |
| 10414433 | 6720456H20Rik | NM_172600    | 0.00809741   | 1.18475 | E11.5 * Wnt1 up vs E11.5 * Ctrl |
| 10395074 | Myt1l         | NM_001093775 | 0.00398448   | 1.18474 | E11.5 * Wnt1 up vs E11.5 * Ctrl |
| 10603431 | Suv39h1       | NM_011514    | 0.00587446   | 1.18462 | E11.5 * Wnt1 up vs E11.5 * Ctrl |
| 10479811 | Mcm10         | NM_027290    | 0.00735932   | 1.18379 | E11.5 * Wnt1 up vs E11.5 * Ctrl |
| 10500736 | Vangl1        | NM_177545    | 0.000862224  | 1.18368 | E11.5 * Wnt1 up vs E11.5 * Ctrl |
| 10558458 | Ppp2r2d       | NM_026391    | 0.00866092   | 1.18366 | E11.5 * Wnt1 up vs E11.5 * Ctrl |
| 10477630 | Dynlrb1       | NM_025947    | 4.93161e-008 | 1.18358 | E11.5 * Wnt1 up vs E11.5 * Ctrl |
| 10563991 | ---           | ---          | 0.00813363   | 1.1835  | E11.5 * Wnt1 up vs E11.5 * Ctrl |
| 10368930 | 1700021F05Rik | NM_026411    | 0.00376873   | 1.18317 | E11.5 * Wnt1 up vs E11.5 * Ctrl |
| 10568260 | Zfp629        | NM_177226    | 0.00749919   | 1.18283 | E11.5 * Wnt1 up vs E11.5 * Ctrl |
| 10582201 | Cox4nb        | NM_010926    | 0.00176093   | 1.18278 | E11.5 * Wnt1 up vs E11.5 * Ctrl |
| 10561868 | Wdr62         | BC054747     | 0.00850993   | 1.18267 | E11.5 * Wnt1 up vs E11.5 * Ctrl |
| 10407570 | Zmynd11       | NM_144516    | 0.00165276   | 1.18261 | E11.5 * Wnt1 up vs E11.5 * Ctrl |
| 10434869 | Ccdc50        | NM_026202    | 0.00111289   | 1.18252 | E11.5 * Wnt1 up vs E11.5 * Ctrl |
| 10455801 | Phax          | NM_019996    | 0.00135787   | 1.18251 | E11.5 * Wnt1 up vs E11.5 * Ctrl |
| 10406141 | Brd9          | NM_001024508 | 0.00328928   | 1.18168 | E11.5 * Wnt1 up vs E11.5 * Ctrl |
| 10470529 | Olfr1         | NM_019498    | 0.00703495   | 1.18151 | E11.5 * Wnt1 up vs E11.5 * Ctrl |
| 10538878 | ENSMUSG00000C | ENSMUST00000 | 0.00815252   | 1.18126 | E11.5 * Wnt1 up vs E11.5 * Ctrl |
| 10592734 | Cbl           | NM_007619    | 0.00694142   | 1.18125 | E11.5 * Wnt1 up vs E11.5 * Ctrl |
| 10490225 | Slmo2         | NM_025531    | 0.00782135   | 1.18094 | E11.5 * Wnt1 up vs E11.5 * Ctrl |
| 10462346 | Rcl1          | NM_021525    | 0.0031581    | 1.18087 | E11.5 * Wnt1 up vs E11.5 * Ctrl |
| 10416588 | 1300010F03Rik | NM_027906    | 0.0015828    | 1.18061 | E11.5 * Wnt1 up vs E11.5 * Ctrl |
| 10579969 | Zfp330        | NM_145600    | 0.000903496  | 1.18031 | E11.5 * Wnt1 up vs E11.5 * Ctrl |
| 10411491 | Tnpo1         | NM_178716    | 0.000517437  | 1.17987 | E11.5 * Wnt1 up vs E11.5 * Ctrl |
| 10471519 | Tor2a         | NM_152800    | 0.00276128   | 1.17973 | E11.5 * Wnt1 up vs E11.5 * Ctrl |
| 10576101 | Zc3h18        | NM_001029993 | 0.00882572   | 1.17951 | E11.5 * Wnt1 up vs E11.5 * Ctrl |
| 10586274 | 2010321M09Rik | NM_175153    | 0.00663588   | 1.17941 | E11.5 * Wnt1 up vs E11.5 * Ctrl |
| 10505182 | Gng10         | NM_025277    | 0.000272051  | 1.17941 | E11.5 * Wnt1 up vs E11.5 * Ctrl |
| 10597575 | Plcd1         | NM_019676    | 0.00741006   | 1.17912 | E11.5 * Wnt1 up vs E11.5 * Ctrl |
| 10576056 | Map1lc3b      | NM_026160    | 0.00857818   | 1.17904 | E11.5 * Wnt1 up vs E11.5 * Ctrl |
| 10570321 | Cul4a         | NM_146207    | 0.00721158   | 1.17863 | E11.5 * Wnt1 up vs E11.5 * Ctrl |
| 10414522 | Apex1         | NM_009687    | 0.00134425   | 1.17852 | E11.5 * Wnt1 up vs E11.5 * Ctrl |
| 10484941 | Madd          | NM_145527    | 0.00201341   | 1.17819 | E11.5 * Wnt1 up vs E11.5 * Ctrl |
| 10397752 | Calm1         | NM_009790    | 1.30055e-005 | 1.17812 | E11.5 * Wnt1 up vs E11.5 * Ctrl |
| 10594645 | Rab8b         | NM_173413    | 0.00884204   | 1.17799 | E11.5 * Wnt1 up vs E11.5 * Ctrl |
| 10476702 | Sec23b        | NM_019787    | 0.00253579   | 1.17795 | E11.5 * Wnt1 up vs E11.5 * Ctrl |
| 10539822 | Copg          | NM_017477    | 0.0025913    | 1.17729 | E11.5 * Wnt1 up vs E11.5 * Ctrl |
| 10465686 | Rtn3          | NM_001003934 | 0.00106059   | 1.17726 | E11.5 * Wnt1 up vs E11.5 * Ctrl |
| 10462724 | Tnks2         | ENSMUST00000 | 0.00227061   | 1.17713 | E11.5 * Wnt1 up vs E11.5 * Ctrl |
| 10492480 | Gfm1          | NM_138591    | 0.00803261   | 1.17696 | E11.5 * Wnt1 up vs E11.5 * Ctrl |
| 10542445 | Strap         | NM_011499    | 0.000196722  | 1.17642 | E11.5 * Wnt1 up vs E11.5 * Ctrl |
| 10389674 | Dynll2        | NM_026556    | 0.000672943  | 1.17629 | E11.5 * Wnt1 up vs E11.5 * Ctrl |

|          |               |              |              |         |                                 |
|----------|---------------|--------------|--------------|---------|---------------------------------|
| 10596570 | Rbm15b        | BC052180     | 0.00352395   | 1.17529 | E11.5 * Wnt1 up vs E11.5 * Ctrl |
| 10391242 | Rab5c         | NM_024456    | 0.00650401   | 1.17515 | E11.5 * Wnt1 up vs E11.5 * Ctrl |
| 10352947 | Mrpl15        | NM_025300    | 0.000903042  | 1.17499 | E11.5 * Wnt1 up vs E11.5 * Ctrl |
| 10552681 | Josd2         | NM_025368    | 0.00269055   | 1.17492 | E11.5 * Wnt1 up vs E11.5 * Ctrl |
| 10393021 | Recql5        | NM_130454    | 0.00800011   | 1.17459 | E11.5 * Wnt1 up vs E11.5 * Ctrl |
| 10588903 | Usp4          | NM_011678    | 0.00105522   | 1.17449 | E11.5 * Wnt1 up vs E11.5 * Ctrl |
| 10593367 | Dlat          | NM_145614    | 0.000947832  | 1.17443 | E11.5 * Wnt1 up vs E11.5 * Ctrl |
| 10424411 | Tsg101        | NM_021884    | 0.0063333    | 1.17345 | E11.5 * Wnt1 up vs E11.5 * Ctrl |
| 10583610 | Ilf3          | NM_010561    | 0.00196747   | 1.17334 | E11.5 * Wnt1 up vs E11.5 * Ctrl |
| 10389114 | Nle1          | NM_145431    | 0.00760754   | 1.17304 | E11.5 * Wnt1 up vs E11.5 * Ctrl |
| 10378508 | Tsr1          | NM_177325    | 0.00568243   | 1.17297 | E11.5 * Wnt1 up vs E11.5 * Ctrl |
| 10567576 | Mettl9        | NM_021554    | 0.00550874   | 1.17277 | E11.5 * Wnt1 up vs E11.5 * Ctrl |
| 10478938 | Hax1          | NM_011826    | 0.00176994   | 1.17245 | E11.5 * Wnt1 up vs E11.5 * Ctrl |
| 10605090 | Idh3g         | NM_008323    | 0.00203907   | 1.17214 | E11.5 * Wnt1 up vs E11.5 * Ctrl |
| 10580370 | Dnaja2        | NM_019794    | 3.08096e-005 | 1.1719  | E11.5 * Wnt1 up vs E11.5 * Ctrl |
| 10473793 | Psmc3         | NM_008948    | 0.00026258   | 1.17177 | E11.5 * Wnt1 up vs E11.5 * Ctrl |
| 10389601 | 1200011M11Rik | BC020005     | 0.00539078   | 1.17148 | E11.5 * Wnt1 up vs E11.5 * Ctrl |
| 10403361 | Pitrm1        | NM_145131    | 0.00552879   | 1.1714  | E11.5 * Wnt1 up vs E11.5 * Ctrl |
| 10511892 | ---           | ---          | 0.00804527   | 1.17128 | E11.5 * Wnt1 up vs E11.5 * Ctrl |
| 10438308 | Ranbp1        | NM_011239    | 0.000664343  | 1.17118 | E11.5 * Wnt1 up vs E11.5 * Ctrl |
| 10405662 | Mak10         | NM_030153    | 0.000602129  | 1.17118 | E11.5 * Wnt1 up vs E11.5 * Ctrl |
| 10476648 | Dstn          | NM_019771    | 0.00613003   | 1.17109 | E11.5 * Wnt1 up vs E11.5 * Ctrl |
| 10545450 | Tgolin1       | NM_009443    | 0.00764732   | 1.17085 | E11.5 * Wnt1 up vs E11.5 * Ctrl |
| 10388132 | 4933427D14Rik | BC043106     | 0.00502354   | 1.17084 | E11.5 * Wnt1 up vs E11.5 * Ctrl |
| 10576175 | Cdh15         | NM_007662    | 0.00286569   | 1.17069 | E11.5 * Wnt1 up vs E11.5 * Ctrl |
| 10503134 | Sdcbp         | NM_001098227 | 7.88883e-006 | 1.17019 | E11.5 * Wnt1 up vs E11.5 * Ctrl |
| 10578763 | Sap30         | NM_021788    | 0.0016422    | 1.16974 | E11.5 * Wnt1 up vs E11.5 * Ctrl |
| 10577070 | Tubgcp3       | NM_198031    | 0.00349105   | 1.16963 | E11.5 * Wnt1 up vs E11.5 * Ctrl |
| 10435784 | BC002163      | NR_002445    | 0.00336325   | 1.16954 | E11.5 * Wnt1 up vs E11.5 * Ctrl |
| 10466402 | Eif4a1        | NM_144958    | 0.000908969  | 1.16936 | E11.5 * Wnt1 up vs E11.5 * Ctrl |
| 10576191 | Spg7          | NM_153176    | 0.00100244   | 1.16924 | E11.5 * Wnt1 up vs E11.5 * Ctrl |
| 10443764 | Slc37a1       | NM_153062    | 0.000993214  | 1.16912 | E11.5 * Wnt1 up vs E11.5 * Ctrl |
| 10468816 | 2700078E11Rik | BC026363     | 0.00386586   | 1.16881 | E11.5 * Wnt1 up vs E11.5 * Ctrl |
| 10514590 | Dock7         | NM_026082    | 0.000258599  | 1.16876 | E11.5 * Wnt1 up vs E11.5 * Ctrl |
| 10572253 | Sf4           | NM_027481    | 0.00331405   | 1.16833 | E11.5 * Wnt1 up vs E11.5 * Ctrl |
| 10439991 | Tfg           | NM_019678    | 0.000226554  | 1.16815 | E11.5 * Wnt1 up vs E11.5 * Ctrl |
| 10406795 | Gfm2          | NM_177266    | 0.00342251   | 1.1677  | E11.5 * Wnt1 up vs E11.5 * Ctrl |
| 10603541 | ---           | ---          | 0.00270212   | 1.16756 | E11.5 * Wnt1 up vs E11.5 * Ctrl |
| 10468022 | Mrpl43        | NM_053164    | 0.0026998    | 1.16747 | E11.5 * Wnt1 up vs E11.5 * Ctrl |
| 10354168 | Tbc1d8        | NM_018775    | 0.00672998   | 1.16705 | E11.5 * Wnt1 up vs E11.5 * Ctrl |
| 10524314 | Pitpnb        | NM_019640    | 0.00197568   | 1.16698 | E11.5 * Wnt1 up vs E11.5 * Ctrl |
| 10391410 | Becn1         | NM_019584    | 0.00562417   | 1.16688 | E11.5 * Wnt1 up vs E11.5 * Ctrl |
| 10398195 | Ccnk          | NM_009832    | 0.00195167   | 1.1667  | E11.5 * Wnt1 up vs E11.5 * Ctrl |
| 10374908 | Rtn4          | NM_194054    | 0.00112438   | 1.16645 | E11.5 * Wnt1 up vs E11.5 * Ctrl |
| 10488929 | Eif6          | NM_010579    | 0.000942682  | 1.16641 | E11.5 * Wnt1 up vs E11.5 * Ctrl |
| 10386543 | Pabpc4        | NM_130881    | 0.00817277   | 1.16628 | E11.5 * Wnt1 up vs E11.5 * Ctrl |
| 10389701 | Akap1         | NM_009648    | 0.00880091   | 1.16571 | E11.5 * Wnt1 up vs E11.5 * Ctrl |
| 10561323 | Map3k10       | NM_001081292 | 0.00414376   | 1.16471 | E11.5 * Wnt1 up vs E11.5 * Ctrl |
| 10489413 | Tomm34        | NM_025996    | 0.0054302    | 1.16461 | E11.5 * Wnt1 up vs E11.5 * Ctrl |
| 10453916 | ---           | ---          | 0.00184642   | 1.16423 | E11.5 * Wnt1 up vs E11.5 * Ctrl |
| 10430945 | Poldip3       | NM_178627    | 0.00801743   | 1.16377 | E11.5 * Wnt1 up vs E11.5 * Ctrl |
| 10438358 | 05-Sep        | NM_213614    | 0.00531979   | 1.16332 | E11.5 * Wnt1 up vs E11.5 * Ctrl |
| 10605831 | Las1l         | NM_152822    | 0.00739225   | 1.16299 | E11.5 * Wnt1 up vs E11.5 * Ctrl |
| 10347772 | ENSMUSG00000  | ENSMUST00000 | 0.00780602   | 1.16298 | E11.5 * Wnt1 up vs E11.5 * Ctrl |
| 10360863 | Mark1         | NM_145515    | 0.0025223    | 1.16288 | E11.5 * Wnt1 up vs E11.5 * Ctrl |
| 10477887 | 0610011L14Rik | NM_026661    | 0.00566272   | 1.16242 | E11.5 * Wnt1 up vs E11.5 * Ctrl |
| 10454709 | Kif20a        | NM_009004    | 0.000726924  | 1.16174 | E11.5 * Wnt1 up vs E11.5 * Ctrl |
| 10578539 | Slc25a4       | NM_007450    | 0.000298667  | 1.16171 | E11.5 * Wnt1 up vs E11.5 * Ctrl |
| 10451495 | Ubr2          | NM_146078    | 0.00059378   | 1.16073 | E11.5 * Wnt1 up vs E11.5 * Ctrl |
| 10578019 | Nudc          | NM_010948    | 0.00889762   | 1.16057 | E11.5 * Wnt1 up vs E11.5 * Ctrl |
| 10480057 | Rbm17         | NM_152824    | 0.00268277   | 1.16055 | E11.5 * Wnt1 up vs E11.5 * Ctrl |
| 10513824 | Cdk5rap2      | NM_145990    | 0.00777697   | 1.16015 | E11.5 * Wnt1 up vs E11.5 * Ctrl |
| 10441987 | Chd1          | NM_007690    | 0.000606863  | 1.1596  | E11.5 * Wnt1 up vs E11.5 * Ctrl |
| 10428052 | Cct5          | NM_007637    | 2.65102e-006 | 1.15882 | E11.5 * Wnt1 up vs E11.5 * Ctrl |
| 10504926 | Rnf20         | NM_182999    | 0.000817556  | 1.15873 | E11.5 * Wnt1 up vs E11.5 * Ctrl |
| 10539861 | Rpn1          | NM_133933    | 0.00577674   | 1.15871 | E11.5 * Wnt1 up vs E11.5 * Ctrl |

|                        |              |              |         |                                 |
|------------------------|--------------|--------------|---------|---------------------------------|
| 10604844 Sms           | NM_009214    | 0.00744892   | 1.15856 | E11.5 * Wnt1 up vs E11.5 * Ctrl |
| 10597920 Zdhhc3        | NM_026917    | 0.00271749   | 1.15855 | E11.5 * Wnt1 up vs E11.5 * Ctrl |
| 10426439 Pphln1        | NM_146062    | 0.00221344   | 1.15848 | E11.5 * Wnt1 up vs E11.5 * Ctrl |
| 10385159 Rars          | NM_025936    | 6.74611e-006 | 1.15836 | E11.5 * Wnt1 up vs E11.5 * Ctrl |
| 10486322               | ---          | 0.00542285   | 1.1582  | E11.5 * Wnt1 up vs E11.5 * Ctrl |
| 10493891 Ywhaz         | NM_011740    | 1.1767e-005  | 1.15818 | E11.5 * Wnt1 up vs E11.5 * Ctrl |
| 10515590 Kdm4a         | NM_172382    | 0.00799299   | 1.1581  | E11.5 * Wnt1 up vs E11.5 * Ctrl |
| 10479026 Rae1          | NM_175112    | 0.000999509  | 1.15789 | E11.5 * Wnt1 up vs E11.5 * Ctrl |
| 10468037               | ---          | 0.00737918   | 1.15747 | E11.5 * Wnt1 up vs E11.5 * Ctrl |
| 10533285 Ptpn11        | NM_011202    | 0.00826647   | 1.15742 | E11.5 * Wnt1 up vs E11.5 * Ctrl |
| 10530434 Commd8        | NM_178599    | 0.00608606   | 1.15713 | E11.5 * Wnt1 up vs E11.5 * Ctrl |
| 10529425 Nop14         | NM_029278    | 0.00362477   | 1.15617 | E11.5 * Wnt1 up vs E11.5 * Ctrl |
| 10360225 Timm23        | NM_016897    | 0.0013913    | 1.15582 | E11.5 * Wnt1 up vs E11.5 * Ctrl |
| 10416069 Timm23        | NM_016897    | 0.0013913    | 1.15582 | E11.5 * Wnt1 up vs E11.5 * Ctrl |
| 10569134 Deaf1         | NM_016874    | 0.00740436   | 1.15581 | E11.5 * Wnt1 up vs E11.5 * Ctrl |
| 10413697 Pbrn1         | NM_001081251 | 0.00680324   | 1.15573 | E11.5 * Wnt1 up vs E11.5 * Ctrl |
| 10570373 Tfdp1         | NM_009361    | 0.00460546   | 1.15562 | E11.5 * Wnt1 up vs E11.5 * Ctrl |
| 10586390 Rasl12        | NM_001033158 | 0.00596494   | 1.15541 | E11.5 * Wnt1 up vs E11.5 * Ctrl |
| 10442829 Gng13         | NM_022422    | 0.00579589   | 1.15531 | E11.5 * Wnt1 up vs E11.5 * Ctrl |
| 10406417 Actg1         | NM_009609    | 0.000937385  | 1.1551  | E11.5 * Wnt1 up vs E11.5 * Ctrl |
| 10545940 Gmcl1         | NM_011818    | 0.000205138  | 1.15501 | E11.5 * Wnt1 up vs E11.5 * Ctrl |
| 10380189 Mks1          | NM_001039684 | 0.00479013   | 1.15469 | E11.5 * Wnt1 up vs E11.5 * Ctrl |
| 10400030 Bzw2          | NM_025840    | 0.00881092   | 1.15383 | E11.5 * Wnt1 up vs E11.5 * Ctrl |
| 10446785 Spast         | NM_016962    | 5.43465e-005 | 1.15327 | E11.5 * Wnt1 up vs E11.5 * Ctrl |
| 10528268 Ptpn12        | NM_011203    | 0.0044328    | 1.15323 | E11.5 * Wnt1 up vs E11.5 * Ctrl |
| 10496475 Adh5          | NM_007410    | 6.16761e-005 | 1.15302 | E11.5 * Wnt1 up vs E11.5 * Ctrl |
| 10356577 Ilkap         | NM_023343    | 0.00850151   | 1.15267 | E11.5 * Wnt1 up vs E11.5 * Ctrl |
| 10577866 Ash2l         | NM_011791    | 2.05121e-005 | 1.15259 | E11.5 * Wnt1 up vs E11.5 * Ctrl |
| 10350489 Uchl5         | NM_019562    | 0.00219276   | 1.15238 | E11.5 * Wnt1 up vs E11.5 * Ctrl |
| 10460196 1810055G02Rik | NM_028077    | 0.00548884   | 1.15161 | E11.5 * Wnt1 up vs E11.5 * Ctrl |
| 10543031 Slc25a13      | NM_015829    | 0.00442601   | 1.15157 | E11.5 * Wnt1 up vs E11.5 * Ctrl |
| 10457508 Npc1          | NM_008720    | 0.0063516    | 1.15086 | E11.5 * Wnt1 up vs E11.5 * Ctrl |
| 10499839 Snapin        | NM_133854    | 0.000972369  | 1.15005 | E11.5 * Wnt1 up vs E11.5 * Ctrl |
| 10505461 Atp6v1g1      | NM_024173    | 0.00557858   | 1.14934 | E11.5 * Wnt1 up vs E11.5 * Ctrl |
| 10384529 Cep68         | NM_172260    | 0.00774745   | 1.14911 | E11.5 * Wnt1 up vs E11.5 * Ctrl |
| 10475027 Tyro3         | NM_019392    | 0.00694407   | 1.14786 | E11.5 * Wnt1 up vs E11.5 * Ctrl |
| 10601466 Tex16         | NM_031382    | 0.00795098   | 1.14754 | E11.5 * Wnt1 up vs E11.5 * Ctrl |
| 10571441 Adam39        | NM_001025380 | 0.0073065    | 1.1475  | E11.5 * Wnt1 up vs E11.5 * Ctrl |
| 10460926 Sf1           | NM_001110791 | 0.00125835   | 1.1474  | E11.5 * Wnt1 up vs E11.5 * Ctrl |
| 10375980 Aff4          | NM_033565    | 0.00573709   | 1.14699 | E11.5 * Wnt1 up vs E11.5 * Ctrl |
| 10353420 Mcm3          | NM_008563    | 0.00665138   | 1.14674 | E11.5 * Wnt1 up vs E11.5 * Ctrl |
| 10545658 Wdr54         | NM_023790    | 0.00423422   | 1.14665 | E11.5 * Wnt1 up vs E11.5 * Ctrl |
| 10458940 Zfp608        | NM_175751    | 0.00681347   | 1.14631 | E11.5 * Wnt1 up vs E11.5 * Ctrl |
| 10531488 Ccni          | NM_017367    | 0.00839691   | 1.14594 | E11.5 * Wnt1 up vs E11.5 * Ctrl |
| 10601164 Nono          | NM_023144    | 0.00688589   | 1.14576 | E11.5 * Wnt1 up vs E11.5 * Ctrl |
| 10607524 Sms           | NM_009214    | 0.0072536    | 1.14549 | E11.5 * Wnt1 up vs E11.5 * Ctrl |
| 10348004 Psmd1         | NM_027357    | 0.00021083   | 1.1451  | E11.5 * Wnt1 up vs E11.5 * Ctrl |
| 10347254 Smarcal1      | NM_018817    | 0.00553174   | 1.14464 | E11.5 * Wnt1 up vs E11.5 * Ctrl |
| 10580771 Ciapin1       | NM_134141    | 0.00545536   | 1.144   | E11.5 * Wnt1 up vs E11.5 * Ctrl |
| 10604100 Ndufa1        | NM_019443    | 0.00721451   | 1.14388 | E11.5 * Wnt1 up vs E11.5 * Ctrl |
| 10477004 LOC100044416  | XR_030619    | 0.00258559   | 1.1433  | E11.5 * Wnt1 up vs E11.5 * Ctrl |
| 10532901 OTTMUSG00000  | XR_033041    | 0.00527426   | 1.14329 | E11.5 * Wnt1 up vs E11.5 * Ctrl |
| 10593591 Acat1         | NM_144784    | 0.00329679   | 1.14236 | E11.5 * Wnt1 up vs E11.5 * Ctrl |
| 10446109 Safb          | ENSMUST00000 | 0.00102986   | 1.1412  | E11.5 * Wnt1 up vs E11.5 * Ctrl |
| 10515878 Ybx1          | NM_011732    | 0.00126203   | 1.14101 | E11.5 * Wnt1 up vs E11.5 * Ctrl |
| 10418804 Timm23        | NM_016897    | 0.00288286   | 1.141   | E11.5 * Wnt1 up vs E11.5 * Ctrl |
| 10531133 Grsf1         | NM_178700    | 0.000414537  | 1.14029 | E11.5 * Wnt1 up vs E11.5 * Ctrl |
| 10591905 Glib1l3       | NM_001113323 | 0.00818837   | 1.14006 | E11.5 * Wnt1 up vs E11.5 * Ctrl |
| 10437687 Litaf         | NM_019980    | 0.00883164   | 1.13986 | E11.5 * Wnt1 up vs E11.5 * Ctrl |
| 10490946 Hsp90aa1      | NM_010480    | 0.00796136   | 1.13956 | E11.5 * Wnt1 up vs E11.5 * Ctrl |
| 10363368 Timm23        | NM_016897    | 0.00296987   | 1.1393  | E11.5 * Wnt1 up vs E11.5 * Ctrl |
| 10460221 Chka          | NM_013490    | 0.00723587   | 1.13821 | E11.5 * Wnt1 up vs E11.5 * Ctrl |
| 10382069 Psmc5         | NM_008950    | 0.000686009  | 1.13815 | E11.5 * Wnt1 up vs E11.5 * Ctrl |
| 10377987 Rabep1        | NM_019400    | 0.00186424   | 1.13687 | E11.5 * Wnt1 up vs E11.5 * Ctrl |
| 10549497 3010003L21Rik | BC106181     | 0.00528522   | 1.13658 | E11.5 * Wnt1 up vs E11.5 * Ctrl |
| 10434233 Ufd1l         | NM_011672    | 0.00283921   | 1.13634 | E11.5 * Wnt1 up vs E11.5 * Ctrl |

|                        |              |             |          |                                   |
|------------------------|--------------|-------------|----------|-----------------------------------|
| 10356657 Ndufa10       | NM_024197    | 0.00751325  | 1.13555  | E11.5 * Wnt1 up vs E11.5 * Ctrl   |
| 10518642 Ube4b         | NM_022022    | 0.00391367  | 1.1348   | E11.5 * Wnt1 up vs E11.5 * Ctrl   |
| 10372750 Cand1         | NM_027994    | 0.000922015 | 1.13392  | E11.5 * Wnt1 up vs E11.5 * Ctrl   |
| 10478409 Pkig          | NM_001039390 | 0.00532359  | 1.13391  | E11.5 * Wnt1 up vs E11.5 * Ctrl   |
| 10569927 Map2k7        | NM_001042557 | 0.00685645  | 1.13333  | E11.5 * Wnt1 up vs E11.5 * Ctrl   |
| 10490544 Ythdf1        | NM_173761    | 0.00119458  | 1.13252  | E11.5 * Wnt1 up vs E11.5 * Ctrl   |
| 10390352 Kpnb1         | NM_008379    | 0.00135822  | 1.13154  | E11.5 * Wnt1 up vs E11.5 * Ctrl   |
| 10380732 Mrpl10        | NM_026154    | 0.000680765 | 1.13076  | E11.5 * Wnt1 up vs E11.5 * Ctrl   |
| 10501143 Ahcyl1        | NM_145542    | 0.00335475  | 1.13075  | E11.5 * Wnt1 up vs E11.5 * Ctrl   |
| 10580704 Amfr          | NM_011787    | 0.000245883 | 1.13015  | E11.5 * Wnt1 up vs E11.5 * Ctrl   |
| 10466848 D19Bwg1357e   | NM_177474    | 0.00375361  | 1.12969  | E11.5 * Wnt1 up vs E11.5 * Ctrl   |
| 10435149 Fytd1         | NM_027226    | 0.000721894 | 1.12888  | E11.5 * Wnt1 up vs E11.5 * Ctrl   |
| 10601091 Foxo4         | NM_018789    | 0.00555035  | 1.12851  | E11.5 * Wnt1 up vs E11.5 * Ctrl   |
| 10523206 Uso1          | NM_019490    | 0.0085735   | 1.12732  | E11.5 * Wnt1 up vs E11.5 * Ctrl   |
| 10437748 Gspt1         | NM_146066    | 0.00254906  | 1.12612  | E11.5 * Wnt1 up vs E11.5 * Ctrl   |
| 10543650 Tnp03         | NM_177296    | 0.00133237  | 1.12599  | E11.5 * Wnt1 up vs E11.5 * Ctrl   |
| 10542397 H2afj         | NM_177688    | 0.00793151  | 1.12559  | E11.5 * Wnt1 up vs E11.5 * Ctrl   |
| 10375926 Ppp2ca        | NM_019411    | 0.00266738  | 1.12341  | E11.5 * Wnt1 up vs E11.5 * Ctrl   |
| 10358359 Cdc73         | NM_145991    | 0.00810467  | 1.12142  | E11.5 * Wnt1 up vs E11.5 * Ctrl   |
| 10426650 Tuba1c        | NM_009448    | 0.00628306  | 1.12108  | E11.5 * Wnt1 up vs E11.5 * Ctrl   |
| 10607646 Nhs           | NM_001081052 | 0.00846705  | 1.11924  | E11.5 * Wnt1 up vs E11.5 * Ctrl   |
| 10539177 Eif4a3        | NM_138669    | 0.00643872  | 1.11907  | E11.5 * Wnt1 up vs E11.5 * Ctrl   |
| 10391178 Dnajc7        | NM_019795    | 0.00776964  | 1.11773  | E11.5 * Wnt1 up vs E11.5 * Ctrl   |
| 10393754 Actg1         | NM_009609    | 0.0025074   | 1.11773  | E11.5 * Wnt1 up vs E11.5 * Ctrl   |
| 10448269 Zfp13         | NM_011747    | 0.0078256   | 1.11761  | E11.5 * Wnt1 up vs E11.5 * Ctrl   |
| 10385790 Hspa4         | NM_008300    | 0.0045299   | 1.11675  | E11.5 * Wnt1 up vs E11.5 * Ctrl   |
| 10533659 Clip1         | NM_019765    | 0.00667715  | 1.11662  | E11.5 * Wnt1 up vs E11.5 * Ctrl   |
| 10459405 Nars          | NM_001142950 | 0.00591002  | 1.11614  | E11.5 * Wnt1 up vs E11.5 * Ctrl   |
| 10416940 Tpm3          | ENSMUST00000 | 0.000776792 | 1.11569  | E11.5 * Wnt1 up vs E11.5 * Ctrl   |
| 10517465 Kdm1          | NM_133872    | 0.00327961  | 1.11565  | E11.5 * Wnt1 up vs E11.5 * Ctrl   |
| 10432162 2310037124Rik | BC003301     | 0.00234109  | 1.11448  | E11.5 * Wnt1 up vs E11.5 * Ctrl   |
| 10541067 Eif4a3        | NM_138669    | 0.00510959  | 1.11387  | E11.5 * Wnt1 up vs E11.5 * Ctrl   |
| 10506424 Actg1         | NM_009609    | 0.00372025  | 1.11269  | E11.5 * Wnt1 up vs E11.5 * Ctrl   |
| 10501265 Gnai3         | NM_010306    | 0.00775723  | 1.11184  | E11.5 * Wnt1 up vs E11.5 * Ctrl   |
| 10490370 Psma7         | NM_011969    | 0.000198223 | 1.11079  | E11.5 * Wnt1 up vs E11.5 * Ctrl   |
| 10478463 Svs6          | NM_013679    | 0.00505935  | 1.11034  | E11.5 * Wnt1 up vs E11.5 * Ctrl   |
| 10422852 Rpl19         | NM_009078    | 0.0014317   | 1.11028  | E11.5 * Wnt1 up vs E11.5 * Ctrl   |
| 10454469 Ammecnrl      | NM_153515    | 0.00651845  | 1.10959  | E11.5 * Wnt1 up vs E11.5 * Ctrl   |
| 10548785 Dynlt1        | NM_009342    | 0.00067515  | 1.10909  | E11.5 * Wnt1 up vs E11.5 * Ctrl   |
| 10428192 Pabpc1        | NM_008774    | 0.00430162  | 1.10711  | E11.5 * Wnt1 up vs E11.5 * Ctrl   |
| 10529873 Rab2a         | NM_021518    | 0.00703599  | 1.10692  | E11.5 * Wnt1 up vs E11.5 * Ctrl   |
| 10447594 Dynlt1        | NM_009342    | 0.000723253 | 1.1053   | E11.5 * Wnt1 up vs E11.5 * Ctrl   |
| 10503150 Rab2a         | NM_021518    | 0.000226815 | 1.10511  | E11.5 * Wnt1 up vs E11.5 * Ctrl   |
| 10521587 Dnaja1        | NM_008298    | 0.00566373  | 1.10473  | E11.5 * Wnt1 up vs E11.5 * Ctrl   |
| 10352514 Eprs          | NM_029735    | 0.00235006  | 1.10378  | E11.5 * Wnt1 up vs E11.5 * Ctrl   |
| 10378802 Blmh          | NM_178645    | 0.00798982  | 1.10291  | E11.5 * Wnt1 up vs E11.5 * Ctrl   |
| 10344633 Tcea1         | NM_011541    | 0.00877566  | 1.10287  | E11.5 * Wnt1 up vs E11.5 * Ctrl   |
| 10385686 Hnrnpab       | NM_001048061 | 0.00276406  | 1.10117  | E11.5 * Wnt1 up vs E11.5 * Ctrl   |
| 10434878 ENSMUSG00000  | ENSMUST00000 | 0.00613638  | 1.09976  | E11.5 * Wnt1 up vs E11.5 * Ctrl   |
| 10544015 Ybx1          | NM_011732    | 0.000828922 | 1.09867  | E11.5 * Wnt1 up vs E11.5 * Ctrl   |
| 10581910 Tmem170       | NM_025781    | 0.00771619  | 1.09834  | E11.5 * Wnt1 up vs E11.5 * Ctrl   |
| 10395831 Brms1l        | NM_001037756 | 0.00686743  | 1.09825  | E11.5 * Wnt1 up vs E11.5 * Ctrl   |
| 10407811 Hnrnpf        | NM_133834    | 0.00215795  | 1.09328  | E11.5 * Wnt1 up vs E11.5 * Ctrl   |
| 10506893 Nrd1          | NM_146150    | 0.00144153  | 1.09281  | E11.5 * Wnt1 up vs E11.5 * Ctrl   |
| 10570625 Rpl19         | NM_009078    | 0.00520599  | 1.09172  | E11.5 * Wnt1 up vs E11.5 * Ctrl   |
| 10485514 Caprin1       | NM_016739    | 0.00250154  | 1.08976  | E11.5 * Wnt1 up vs E11.5 * Ctrl   |
| 10380833 Rpl19         | NM_009078    | 0.00704372  | 1.08878  | E11.5 * Wnt1 up vs E11.5 * Ctrl   |
| 10535471 Rac1          | NM_009007    | 0.00608749  | 1.07925  | E11.5 * Wnt1 up vs E11.5 * Ctrl   |
| 10371981 Ccdc38        | NM_175488    | 0.00220454  | 1.07501  | E11.5 * Wnt1 up vs E11.5 * Ctrl   |
| 10541104 Hnrnpf        | NM_133834    | 0.00470149  | 1.0699   | E11.5 * Wnt1 up vs E11.5 * Ctrl   |
| 10348929 Hnrnpf        | NM_133834    | 0.00783075  | 1.06706  | E11.5 * Wnt1 up vs E11.5 * Ctrl   |
| 10598721 Rpl3          | NM_013762    | 0.00233956  | 1.0596   | E11.5 * Wnt1 up vs E11.5 * Ctrl   |
| 10400470 Cox6c         | NM_053071    | 0.00455355  | 1.05841  | E11.5 * Wnt1 up vs E11.5 * Ctrl   |
| 10404262 Rps8          | NM_009098    | 0.00585484  | 1.05375  | E11.5 * Wnt1 up vs E11.5 * Ctrl   |
| 10430669 Rpl3          | NM_013762    | 0.00626344  | 1.05285  | E11.5 * Wnt1 up vs E11.5 * Ctrl   |
| 10607324 Rpl21         | NM_019647    | 0.00701948  | -1.03697 | E11.5 * Wnt1 down vs E11.5 * Ctrl |

|                        |              |             |          |                                   |
|------------------------|--------------|-------------|----------|-----------------------------------|
| 10443492 Rpl21         | NM_019647    | 0.00744904  | -1.03739 | E11.5 * Wnt1 down vs E11.5 * Ctrl |
| 10392996 EG668319      | NM_001111313 | 0.00740912  | -1.03905 | E11.5 * Wnt1 down vs E11.5 * Ctrl |
| 10579839 EG668319      | NM_001111313 | 0.00389698  | -1.0401  | E11.5 * Wnt1 down vs E11.5 * Ctrl |
| 10567823 EG668319      | NM_001111313 | 0.00870792  | -1.04104 | E11.5 * Wnt1 down vs E11.5 * Ctrl |
| 10587651 Rpl21         | NM_019647    | 0.00565319  | -1.04106 | E11.5 * Wnt1 down vs E11.5 * Ctrl |
| 10599433 EG668319      | NM_001111313 | 0.00614722  | -1.0411  | E11.5 * Wnt1 down vs E11.5 * Ctrl |
| 10497918 EG668319      | NM_001111313 | 0.00654031  | -1.04175 | E11.5 * Wnt1 down vs E11.5 * Ctrl |
| 10469904 Rpl21         | NM_019647    | 0.00482758  | -1.04255 | E11.5 * Wnt1 down vs E11.5 * Ctrl |
| 10401695 Rpl21         | BC106116     | 0.00443245  | -1.04586 | E11.5 * Wnt1 down vs E11.5 * Ctrl |
| 10598103 Rpl23a        | NM_207523    | 0.00734855  | -1.04699 | E11.5 * Wnt1 down vs E11.5 * Ctrl |
| 10388776 Rpl23a        | NM_207523    | 0.00536864  | -1.04927 | E11.5 * Wnt1 down vs E11.5 * Ctrl |
| 10562663 EG668668      | NM_001081036 | 0.00804005  | -1.05215 | E11.5 * Wnt1 down vs E11.5 * Ctrl |
| 10543317 Rpl21         | NM_019647    | 0.00414135  | -1.0538  | E11.5 * Wnt1 down vs E11.5 * Ctrl |
| 10521593 Rpl7          | NM_011291    | 0.00852734  | -1.057   | E11.5 * Wnt1 down vs E11.5 * Ctrl |
| 10593320 Rpl10         | NM_052835    | 0.00819475  | -1.07116 | E11.5 * Wnt1 down vs E11.5 * Ctrl |
| 10601857 Ngfrap1       | NM_009750    | 0.00627041  | -1.0742  | E11.5 * Wnt1 down vs E11.5 * Ctrl |
| 10348078 Ptma          | NM_008972    | 0.00246187  | -1.08441 | E11.5 * Wnt1 down vs E11.5 * Ctrl |
| 10600349 Rpl10         | NM_052835    | 0.0046997   | -1.08633 | E11.5 * Wnt1 down vs E11.5 * Ctrl |
| 10467256 Rpl10         | NM_052835    | 0.00438297  | -1.08749 | E11.5 * Wnt1 down vs E11.5 * Ctrl |
| 10409424 Mxd3          | NM_016662    | 0.00847322  | -1.08766 | E11.5 * Wnt1 down vs E11.5 * Ctrl |
| 10528478 Rpl17         | NM_001002239 | 0.00602039  | -1.08971 | E11.5 * Wnt1 down vs E11.5 * Ctrl |
| 10417601 Ptma          | NM_008972    | 0.00407545  | -1.09031 | E11.5 * Wnt1 down vs E11.5 * Ctrl |
| 10404020 V1rh2         | NM_145844    | 0.00384804  | -1.09059 | E11.5 * Wnt1 down vs E11.5 * Ctrl |
| 10513195 Txn1          | NM_011660    | 0.000867752 | -1.09067 | E11.5 * Wnt1 down vs E11.5 * Ctrl |
| 10396059 Rpl17         | NM_001002239 | 0.00382653  | -1.0974  | E11.5 * Wnt1 down vs E11.5 * Ctrl |
| 10564563 Rpl17         | NM_001002239 | 0.00214601  | -1.10007 | E11.5 * Wnt1 down vs E11.5 * Ctrl |
| 10549375 ENSMUSG0000C  | NM_001111300 | 0.00734496  | -1.10145 | E11.5 * Wnt1 down vs E11.5 * Ctrl |
| 10520952 Ppp1cb        | NM_172707    | 0.00185167  | -1.10367 | E11.5 * Wnt1 down vs E11.5 * Ctrl |
| 10357965 Lgr6          | NM_001033409 | 0.00757946  | -1.10369 | E11.5 * Wnt1 down vs E11.5 * Ctrl |
| 10600884 Rpl17         | NM_001002239 | 0.00427423  | -1.10528 | E11.5 * Wnt1 down vs E11.5 * Ctrl |
| 10594161 Arih1         | NM_019927    | 0.00278275  | -1.10536 | E11.5 * Wnt1 down vs E11.5 * Ctrl |
| 10552242 Rpl17         | NM_001002239 | 0.00321428  | -1.10656 | E11.5 * Wnt1 down vs E11.5 * Ctrl |
| 10591773 Hmgn2         | NM_016957    | 0.00134343  | -1.10838 | E11.5 * Wnt1 down vs E11.5 * Ctrl |
| 10537397 Luc7l2        | NM_138680    | 0.00507889  | -1.10858 | E11.5 * Wnt1 down vs E11.5 * Ctrl |
| 10398461 Ppp2r5c       | NM_012023    | 0.00863526  | -1.10977 | E11.5 * Wnt1 down vs E11.5 * Ctrl |
| 10533812 Sbno1         | NM_001081203 | 0.00435141  | -1.11078 | E11.5 * Wnt1 down vs E11.5 * Ctrl |
| 10483563 Tlk1          | NM_172664    | 0.00695127  | -1.11084 | E11.5 * Wnt1 down vs E11.5 * Ctrl |
| 10516823 Epb4.1        | NM_183428    | 0.0018318   | -1.11146 | E11.5 * Wnt1 down vs E11.5 * Ctrl |
| 10517141 Hmgn2         | NM_016957    | 0.000849893 | -1.11236 | E11.5 * Wnt1 down vs E11.5 * Ctrl |
| 10410244 Zfp640        | ENSMUST00000 | 0.00302468  | -1.11241 | E11.5 * Wnt1 down vs E11.5 * Ctrl |
| 10451736 Tbc1d5        | NM_028162    | 0.00856558  | -1.11242 | E11.5 * Wnt1 down vs E11.5 * Ctrl |
| 10506500 Usp24         | ENSMUST00000 | 0.00611369  | -1.11243 | E11.5 * Wnt1 down vs E11.5 * Ctrl |
| 10399897 Hbp1          | NM_153198    | 0.00822856  | -1.11377 | E11.5 * Wnt1 down vs E11.5 * Ctrl |
| 10405626 Rpl17         | NM_001002239 | 0.00864941  | -1.11402 | E11.5 * Wnt1 down vs E11.5 * Ctrl |
| 10579659 Hmgn2         | NM_016957    | 0.00119106  | -1.11468 | E11.5 * Wnt1 down vs E11.5 * Ctrl |
| 10422321 Dzip1         | NM_025943    | 0.00306377  | -1.11522 | E11.5 * Wnt1 down vs E11.5 * Ctrl |
| 10594986 Rpl17         | NM_001002239 | 0.00279279  | -1.11771 | E11.5 * Wnt1 down vs E11.5 * Ctrl |
| 10530666 Lnx1          | NM_010727    | 0.00557909  | -1.11933 | E11.5 * Wnt1 down vs E11.5 * Ctrl |
| 10422912 2410089E03Rik | BC058107     | 0.000727112 | -1.11979 | E11.5 * Wnt1 down vs E11.5 * Ctrl |
| 10388591 Cpd           | NM_007754    | 0.005821    | -1.11988 | E11.5 * Wnt1 down vs E11.5 * Ctrl |
| 10360589 Ahctf1        | NM_026375    | 0.00337399  | -1.11988 | E11.5 * Wnt1 down vs E11.5 * Ctrl |
| 10522472 Fip1l1        | NM_001159573 | 0.00483645  | -1.12169 | E11.5 * Wnt1 down vs E11.5 * Ctrl |
| 10405163 Spin1         | NM_146043    | 0.00256218  | -1.1227  | E11.5 * Wnt1 down vs E11.5 * Ctrl |
| 10516103 Macf1         | NM_009600    | 0.00613145  | -1.1234  | E11.5 * Wnt1 down vs E11.5 * Ctrl |
| 10448004 Phf10         | NM_024250    | 0.00328782  | -1.12398 | E11.5 * Wnt1 down vs E11.5 * Ctrl |
| 10353296 Tceb1         | NM_026456    | 0.00707287  | -1.12468 | E11.5 * Wnt1 down vs E11.5 * Ctrl |
| 10353167 Tram1         | NM_028173    | 0.00174482  | -1.12489 | E11.5 * Wnt1 down vs E11.5 * Ctrl |
| 10428912               | ---          | 0.00206021  | -1.12496 | E11.5 * Wnt1 down vs E11.5 * Ctrl |
| 10597933               | ---          | 0.0076019   | -1.12607 | E11.5 * Wnt1 down vs E11.5 * Ctrl |
| 10346808 Rpl17         | NM_001002239 | 0.0015358   | -1.12743 | E11.5 * Wnt1 down vs E11.5 * Ctrl |
| 10458138 Brd8          | NM_030147    | 0.00607139  | -1.12798 | E11.5 * Wnt1 down vs E11.5 * Ctrl |
| 10523279               | ---          | 0.00379501  | -1.12854 | E11.5 * Wnt1 down vs E11.5 * Ctrl |
| 10492682 1110032E23Rik | NM_133187    | 0.00606877  | -1.12978 | E11.5 * Wnt1 down vs E11.5 * Ctrl |
| 10417013 Dnajc3        | NM_008929    | 0.00630398  | -1.13092 | E11.5 * Wnt1 down vs E11.5 * Ctrl |
| 10417034 Dnajc3        | NM_008929    | 0.00630398  | -1.13092 | E11.5 * Wnt1 down vs E11.5 * Ctrl |
| 10374020 Rhbdd3        | NM_177370    | 0.00433635  | -1.13141 | E11.5 * Wnt1 down vs E11.5 * Ctrl |

|                        |               |             |          |                                   |
|------------------------|---------------|-------------|----------|-----------------------------------|
| 10566698 Olfr514       | NM_146726     | 0.00417928  | -1.13218 | E11.5 * Wnt1 down vs E11.5 * Ctrl |
| 10489936 Adnp          | NM_009628     | 0.00727011  | -1.13281 | E11.5 * Wnt1 down vs E11.5 * Ctrl |
| 10418702 Sh3bp5        | NM_011894     | 0.0084444   | -1.13356 | E11.5 * Wnt1 down vs E11.5 * Ctrl |
| 10400321 1110002B05Rik | NM_134054     | 0.00481796  | -1.1354  | E11.5 * Wnt1 down vs E11.5 * Ctrl |
| 10394477 Laptm4a       | NM_008640     | 0.00148921  | -1.13588 | E11.5 * Wnt1 down vs E11.5 * Ctrl |
| 10558533               | ---           | 0.00599219  | -1.13656 | E11.5 * Wnt1 down vs E11.5 * Ctrl |
| 10368670 Amd1          | NM_009665     | 0.00196626  | -1.13729 | E11.5 * Wnt1 down vs E11.5 * Ctrl |
| 10518781 Per3          | NM_011067     | 0.00603313  | -1.13749 | E11.5 * Wnt1 down vs E11.5 * Ctrl |
| 10366238 Ppp1r12a      | NM_027892     | 0.000820329 | -1.13762 | E11.5 * Wnt1 down vs E11.5 * Ctrl |
| 10345037 Paqr8         | NM_028829     | 0.00111991  | -1.13786 | E11.5 * Wnt1 down vs E11.5 * Ctrl |
| 10373192 Inhbe         | NM_008382     | 0.0045341   | -1.13816 | E11.5 * Wnt1 down vs E11.5 * Ctrl |
| 10374500 Vps54         | NM_139061     | 0.000809019 | -1.13854 | E11.5 * Wnt1 down vs E11.5 * Ctrl |
| 10391378 Ezh1          | NM_007970     | 0.00231703  | -1.13997 | E11.5 * Wnt1 down vs E11.5 * Ctrl |
| 10492442               | ---           | 0.00523431  | -1.14076 | E11.5 * Wnt1 down vs E11.5 * Ctrl |
| 10575021 Zfp90         | NM_011764     | 0.000438809 | -1.14089 | E11.5 * Wnt1 down vs E11.5 * Ctrl |
| 10552488 Kik10         | NM_133712     | 0.00856145  | -1.14096 | E11.5 * Wnt1 down vs E11.5 * Ctrl |
| 10368380 L3mbtl3       | NM_172787     | 0.00758429  | -1.14107 | E11.5 * Wnt1 down vs E11.5 * Ctrl |
| 10380321 Mbtd1         | NM_134012     | 0.00245745  | -1.14482 | E11.5 * Wnt1 down vs E11.5 * Ctrl |
| 10441610 Rshl2a        | NM_025789     | 0.00516168  | -1.14524 | E11.5 * Wnt1 down vs E11.5 * Ctrl |
| 10379496 Spaca3        | NM_029367     | 0.00546004  | -1.14597 | E11.5 * Wnt1 down vs E11.5 * Ctrl |
| 10435714 Tmem39a       | NM_026407     | 0.00233093  | -1.14628 | E11.5 * Wnt1 down vs E11.5 * Ctrl |
| 10394258 Adcy3         | NM_001159537  | 0.00737983  | -1.14633 | E11.5 * Wnt1 down vs E11.5 * Ctrl |
| 10399189 Sp8           | NM_177082     | 0.00498454  | -1.14634 | E11.5 * Wnt1 down vs E11.5 * Ctrl |
| 10593789 Etfa          | NM_145615     | 0.000516082 | -1.14773 | E11.5 * Wnt1 down vs E11.5 * Ctrl |
| 10390707 Top2a         | NM_011623     | 0.00294253  | -1.15108 | E11.5 * Wnt1 down vs E11.5 * Ctrl |
| 10391914 Sh3d20        | NM_183288     | 0.00850833  | -1.15139 | E11.5 * Wnt1 down vs E11.5 * Ctrl |
| 10527832 Pds5b         | NM_175310     | 0.000869401 | -1.15308 | E11.5 * Wnt1 down vs E11.5 * Ctrl |
| 10601235 Ogt           | NM_139144     | 0.001554    | -1.15316 | E11.5 * Wnt1 down vs E11.5 * Ctrl |
| 10598034 ND2           | ENSMUST000001 | 0.00312732  | -1.15324 | E11.5 * Wnt1 down vs E11.5 * Ctrl |
| 10437852 4921513D23Rik | NM_001081154  | 0.00195631  | -1.15367 | E11.5 * Wnt1 down vs E11.5 * Ctrl |
| 10554166 Akap13        | NM_029332     | 0.00741041  | -1.15381 | E11.5 * Wnt1 down vs E11.5 * Ctrl |
| 10474399 Bdnf          | NM_001048139  | 0.00369553  | -1.15382 | E11.5 * Wnt1 down vs E11.5 * Ctrl |
| 10437664 Dexi          | NM_021428     | 0.00867187  | -1.15412 | E11.5 * Wnt1 down vs E11.5 * Ctrl |
| 10408144 V1rh9         | NM_134218     | 0.00837218  | -1.15448 | E11.5 * Wnt1 down vs E11.5 * Ctrl |
| 10365134               | ---           | 0.00525291  | -1.1558  | E11.5 * Wnt1 down vs E11.5 * Ctrl |
| 10561748 1700067C01Rik | NM_029714     | 0.003339    | -1.15677 | E11.5 * Wnt1 down vs E11.5 * Ctrl |
| 10410221 C330022B21Rik | ENSMUST000001 | 0.0050448   | -1.15741 | E11.5 * Wnt1 down vs E11.5 * Ctrl |
| 10530278               | ---           | 0.00442577  | -1.15758 | E11.5 * Wnt1 down vs E11.5 * Ctrl |
| 10528183 Speer4e       | NM_001122661  | 0.000777781 | -1.15786 | E11.5 * Wnt1 down vs E11.5 * Ctrl |
| 10349100 EG626075      | XR_032823     | 0.00114848  | -1.15859 | E11.5 * Wnt1 down vs E11.5 * Ctrl |
| 10544252 E330009J07Rik | NM_175528     | 0.00676757  | -1.15895 | E11.5 * Wnt1 down vs E11.5 * Ctrl |
| 10582429 Cbfa2t3       | NM_009824     | 0.00350005  | -1.15938 | E11.5 * Wnt1 down vs E11.5 * Ctrl |
| 10447141 Eml4          | NM_001114361  | 0.00210334  | -1.15945 | E11.5 * Wnt1 down vs E11.5 * Ctrl |
| 10405633 Ntrk2         | NM_001025074  | 0.00366249  | -1.16066 | E11.5 * Wnt1 down vs E11.5 * Ctrl |
| 10516027 Rlf           | NM_001081013  | 0.00857039  | -1.16119 | E11.5 * Wnt1 down vs E11.5 * Ctrl |
| 10349562 AA986860      | NM_177604     | 0.00456143  | -1.16211 | E11.5 * Wnt1 down vs E11.5 * Ctrl |
| 10380297 Cox11         | NM_199008     | 0.00015253  | -1.16212 | E11.5 * Wnt1 down vs E11.5 * Ctrl |
| 10354816 Clk1          | NM_001042634  | 0.00555833  | -1.16252 | E11.5 * Wnt1 down vs E11.5 * Ctrl |
| 10551293 Cyp2f2        | NM_007817     | 0.00431849  | -1.16253 | E11.5 * Wnt1 down vs E11.5 * Ctrl |
| 10570703 Defa25        | NM_007849     | 0.00532781  | -1.1632  | E11.5 * Wnt1 down vs E11.5 * Ctrl |
| 10551365 Prx           | NM_019412     | 0.00880038  | -1.16325 | E11.5 * Wnt1 down vs E11.5 * Ctrl |
| 10404008 V1rh6         | NM_134215     | 0.00641043  | -1.16333 | E11.5 * Wnt1 down vs E11.5 * Ctrl |
| 10382228 Axin2         | NM_015732     | 0.00666203  | -1.16335 | E11.5 * Wnt1 down vs E11.5 * Ctrl |
| 10542632 lapp          | NM_010491     | 0.00606953  | -1.1634  | E11.5 * Wnt1 down vs E11.5 * Ctrl |
| 10522024 Tbc1d1        | NM_019636     | 0.00116803  | -1.16369 | E11.5 * Wnt1 down vs E11.5 * Ctrl |
| 10408175 Btn1a1        | NM_013483     | 0.00287887  | -1.1641  | E11.5 * Wnt1 down vs E11.5 * Ctrl |
| 10532241 Slc26a1       | NM_174870     | 0.00171085  | -1.16418 | E11.5 * Wnt1 down vs E11.5 * Ctrl |
| 10434094 Kihl22        | NM_145479     | 0.00167855  | -1.16421 | E11.5 * Wnt1 down vs E11.5 * Ctrl |
| 10599463 Xpnpep2       | NM_133213     | 0.00855991  | -1.16461 | E11.5 * Wnt1 down vs E11.5 * Ctrl |
| 10527575 Pan3          | NM_028291     | 0.00384708  | -1.16484 | E11.5 * Wnt1 down vs E11.5 * Ctrl |
| 10479852 Camk1d        | NM_177343     | 0.00849809  | -1.16518 | E11.5 * Wnt1 down vs E11.5 * Ctrl |
| 10413333 Dnahc12       | Z83811        | 0.00157686  | -1.16541 | E11.5 * Wnt1 down vs E11.5 * Ctrl |
| 10397359 Batf          | NM_016767     | 0.00480176  | -1.16583 | E11.5 * Wnt1 down vs E11.5 * Ctrl |
| 10417130 Ubac2         | NM_026861     | 0.0066678   | -1.16655 | E11.5 * Wnt1 down vs E11.5 * Ctrl |
| 10396205 Arid4a        | NM_001081195  | 0.006197    | -1.16663 | E11.5 * Wnt1 down vs E11.5 * Ctrl |
| 10411229 F2r           | NM_010169     | 0.00496054  | -1.16663 | E11.5 * Wnt1 down vs E11.5 * Ctrl |

|                        |              |              |          |                                   |
|------------------------|--------------|--------------|----------|-----------------------------------|
| 10489484 Sdc4          | NM_011521    | 0.00813292   | -1.16691 | E11.5 * Wnt1 down vs E11.5 * Ctrl |
| 10369647 Ddx50         | NM_053183    | 0.0045634    | -1.16697 | E11.5 * Wnt1 down vs E11.5 * Ctrl |
| 10582390 Aprt          | NM_009698    | 0.00602541   | -1.16738 | E11.5 * Wnt1 down vs E11.5 * Ctrl |
| 10441680 Pde10a        | NM_011866    | 0.00459511   | -1.16748 | E11.5 * Wnt1 down vs E11.5 * Ctrl |
| 10497399 Pde7a         | NM_001122759 | 0.00835405   | -1.16756 | E11.5 * Wnt1 down vs E11.5 * Ctrl |
| 10428763 Atad2         | NM_027435    | 0.00597493   | -1.16764 | E11.5 * Wnt1 down vs E11.5 * Ctrl |
| 10548000 Ltbr          | NM_010736    | 0.00504417   | -1.1681  | E11.5 * Wnt1 down vs E11.5 * Ctrl |
| 10361075 Mfsd7b        | NM_001081259 | 0.00605462   | -1.16811 | E11.5 * Wnt1 down vs E11.5 * Ctrl |
| 10589350 Shisa5        | NM_025858    | 0.00232604   | -1.16929 | E11.5 * Wnt1 down vs E11.5 * Ctrl |
| 10450325 Cfb           | NM_008198    | 0.00444935   | -1.16939 | E11.5 * Wnt1 down vs E11.5 * Ctrl |
| 10473708 Agbl2         | NM_178755    | 0.00611466   | -1.16955 | E11.5 * Wnt1 down vs E11.5 * Ctrl |
| 10492558 Smc4          | NM_133786    | 0.0021405    | -1.17001 | E11.5 * Wnt1 down vs E11.5 * Ctrl |
| 10462480 Cstf2t        | NM_031249    | 0.00844626   | -1.17056 | E11.5 * Wnt1 down vs E11.5 * Ctrl |
| 10450025 March2        | NM_145486    | 0.00451074   | -1.17086 | E11.5 * Wnt1 down vs E11.5 * Ctrl |
| 10452508 Twsg1         | NM_023053    | 0.00126809   | -1.17096 | E11.5 * Wnt1 down vs E11.5 * Ctrl |
| 10435019 2310010M20Rik | BC125555     | 0.00835336   | -1.17152 | E11.5 * Wnt1 down vs E11.5 * Ctrl |
| 10567229 Smg1          | NM_001031814 | 0.00210907   | -1.17176 | E11.5 * Wnt1 down vs E11.5 * Ctrl |
| 10597493 Stt3b         | NM_024222    | 0.000304449  | -1.17238 | E11.5 * Wnt1 down vs E11.5 * Ctrl |
| 10504466 OTTMUSG00000  | AK038173     | 0.00438092   | -1.1733  | E11.5 * Wnt1 down vs E11.5 * Ctrl |
| 10545127 4930597O21Rik | ENSMUST00000 | 0.00412029   | -1.17331 | E11.5 * Wnt1 down vs E11.5 * Ctrl |
| 10360003 Dusp12        | NM_023173    | 0.00692524   | -1.17339 | E11.5 * Wnt1 down vs E11.5 * Ctrl |
| 10484648 Olfr1104      | NM_146767    | 0.00174467   | -1.17347 | E11.5 * Wnt1 down vs E11.5 * Ctrl |
| 10365658 Uhrf1bp1l     | NM_029166    | 0.00462533   | -1.17401 | E11.5 * Wnt1 down vs E11.5 * Ctrl |
| 10534889 Agfg2         | NM_178162    | 0.00157751   | -1.17415 | E11.5 * Wnt1 down vs E11.5 * Ctrl |
| 10537957 Krba1         | NM_133922    | 0.00343642   | -1.17428 | E11.5 * Wnt1 down vs E11.5 * Ctrl |
| 10457038 ENSMUSG00000  | ENSMUST00000 | 0.00458647   | -1.17453 | E11.5 * Wnt1 down vs E11.5 * Ctrl |
| 10461867 Vps13a        | AK015803     | 0.00765973   | -1.17472 | E11.5 * Wnt1 down vs E11.5 * Ctrl |
| 10381172 Stat5a        | NM_011488    | 0.00256408   | -1.17522 | E11.5 * Wnt1 down vs E11.5 * Ctrl |
| 10516784               | ---          | 0.00756152   | -1.17559 | E11.5 * Wnt1 down vs E11.5 * Ctrl |
| 10455954 EG240327      | NM_001033767 | 0.00569412   | -1.17628 | E11.5 * Wnt1 down vs E11.5 * Ctrl |
| 10585625 Sin3a         | NM_011378    | 0.00173289   | -1.17641 | E11.5 * Wnt1 down vs E11.5 * Ctrl |
| 10384448 Sec61g        | NM_011343    | 9.78316e-005 | -1.17668 | E11.5 * Wnt1 down vs E11.5 * Ctrl |
| 10568174 Spn           | NM_009259    | 0.00422958   | -1.1772  | E11.5 * Wnt1 down vs E11.5 * Ctrl |
| 10519886 Sema3c        | NM_013657    | 0.00699181   | -1.17722 | E11.5 * Wnt1 down vs E11.5 * Ctrl |
| 10431845 A130051J06Rik | AK037810     | 0.00117973   | -1.17759 | E11.5 * Wnt1 down vs E11.5 * Ctrl |
| 10417004 Dzip1         | NM_025943    | 3.41362e-005 | -1.17782 | E11.5 * Wnt1 down vs E11.5 * Ctrl |
| 10424381               | ---          | 0.00596756   | -1.17786 | E11.5 * Wnt1 down vs E11.5 * Ctrl |
| 10587075               | ---          | 0.00173037   | -1.17846 | E11.5 * Wnt1 down vs E11.5 * Ctrl |
| 10564938 Fes           | NM_010194    | 0.000764153  | -1.17882 | E11.5 * Wnt1 down vs E11.5 * Ctrl |
| 10599781 Htatsf1       | NM_028242    | 0.0029421    | -1.1791  | E11.5 * Wnt1 down vs E11.5 * Ctrl |
| 10372716 Rap1b         | NM_024457    | 0.000935903  | -1.17972 | E11.5 * Wnt1 down vs E11.5 * Ctrl |
| 10350046 Kdm5b         | NM_152895    | 0.000341407  | -1.18109 | E11.5 * Wnt1 down vs E11.5 * Ctrl |
| 10536898 Irf5          | NM_012057    | 0.00695176   | -1.1812  | E11.5 * Wnt1 down vs E11.5 * Ctrl |
| 10436087 Retnlb        | NM_023881    | 0.00530422   | -1.18155 | E11.5 * Wnt1 down vs E11.5 * Ctrl |
| 10570723 Defa25        | NM_007849    | 0.00147924   | -1.18161 | E11.5 * Wnt1 down vs E11.5 * Ctrl |
| 10527213 Daglb         | NM_144915    | 0.00709893   | -1.18162 | E11.5 * Wnt1 down vs E11.5 * Ctrl |
| 10348150 Chrnd         | NM_021600    | 0.00518442   | -1.18187 | E11.5 * Wnt1 down vs E11.5 * Ctrl |
| 10349184 Cdh7          | NM_172853    | 0.00388641   | -1.18195 | E11.5 * Wnt1 down vs E11.5 * Ctrl |
| 10554061 Adamts17      | NM_001033877 | 0.00636695   | -1.1823  | E11.5 * Wnt1 down vs E11.5 * Ctrl |
| 10378443 Olfr412       | NM_001011851 | 0.0081871    | -1.18281 | E11.5 * Wnt1 down vs E11.5 * Ctrl |
| 10396511 Syne2         | NM_001005510 | 0.00796592   | -1.18346 | E11.5 * Wnt1 down vs E11.5 * Ctrl |
| 10605542 2410003J06Rik | NM_001113734 | 0.00320245   | -1.18356 | E11.5 * Wnt1 down vs E11.5 * Ctrl |
| 10604234 EG636756      | XM_912249    | 0.00840904   | -1.18356 | E11.5 * Wnt1 down vs E11.5 * Ctrl |
| 10584276 Sec61g        | NM_011343    | 0.000496212  | -1.18371 | E11.5 * Wnt1 down vs E11.5 * Ctrl |
| 10344939 Terf1         | NM_009352    | 0.0018254    | -1.18378 | E11.5 * Wnt1 down vs E11.5 * Ctrl |
| 10364784 Reep6         | NM_139292    | 0.00165323   | -1.18476 | E11.5 * Wnt1 down vs E11.5 * Ctrl |
| 10426261 Shank3        | NM_021423    | 0.00488493   | -1.1854  | E11.5 * Wnt1 down vs E11.5 * Ctrl |
| 10592217 Stt3a         | NM_008408    | 0.00885688   | -1.18571 | E11.5 * Wnt1 down vs E11.5 * Ctrl |
| 10512011 Zfp292        | NM_013889    | 0.0016769    | -1.18588 | E11.5 * Wnt1 down vs E11.5 * Ctrl |
| 10440463 LOC436427     | XR_034439    | 0.00454319   | -1.18591 | E11.5 * Wnt1 down vs E11.5 * Ctrl |
| 10527423 Trrap         | NM_001081362 | 0.00644425   | -1.18603 | E11.5 * Wnt1 down vs E11.5 * Ctrl |
| 10398578 Tecpr2        | NM_001081057 | 0.00435704   | -1.18672 | E11.5 * Wnt1 down vs E11.5 * Ctrl |
| 10580782 Dok4          | NM_053246    | 0.00309903   | -1.18705 | E11.5 * Wnt1 down vs E11.5 * Ctrl |
| 10366725 Fam19a2       | NM_182807    | 0.00570479   | -1.18721 | E11.5 * Wnt1 down vs E11.5 * Ctrl |
| 10600718 Sec61g        | NM_011343    | 0.00173759   | -1.18733 | E11.5 * Wnt1 down vs E11.5 * Ctrl |
| 10494583 Sec22b        | NM_011342    | 0.000272607  | -1.18739 | E11.5 * Wnt1 down vs E11.5 * Ctrl |

|                        |              |              |          |                                   |
|------------------------|--------------|--------------|----------|-----------------------------------|
| 10421624 Cog3          | NM_177381    | 0.00439913   | -1.18778 | E11.5 * Wnt1 down vs E11.5 * Ctrl |
| 10569100               | ---          | 0.00654177   | -1.18825 | E11.5 * Wnt1 down vs E11.5 * Ctrl |
| 10408064 Olfr11        | NM_146542    | 0.00136658   | -1.18866 | E11.5 * Wnt1 down vs E11.5 * Ctrl |
| 10455342               | ---          | 0.00048572   | -1.18926 | E11.5 * Wnt1 down vs E11.5 * Ctrl |
| 10435075 Tfrc          | NM_011638    | 0.00234269   | -1.18931 | E11.5 * Wnt1 down vs E11.5 * Ctrl |
| 10384044 Myl7          | NM_022879    | 0.00437685   | -1.1896  | E11.5 * Wnt1 down vs E11.5 * Ctrl |
| 10470584 Tsc1          | NM_022887    | 0.00319011   | -1.1896  | E11.5 * Wnt1 down vs E11.5 * Ctrl |
| 10388086 Nlrp1c        | NM_001039234 | 0.00485335   | -1.18965 | E11.5 * Wnt1 down vs E11.5 * Ctrl |
| 10568951 Olfr522       | NM_146952    | 0.00665502   | -1.18969 | E11.5 * Wnt1 down vs E11.5 * Ctrl |
| 10415903 1700049K14Rik | BC049714     | 0.00571095   | -1.19011 | E11.5 * Wnt1 down vs E11.5 * Ctrl |
| 10357391 Zranb3        | NM_027678    | 0.0047269    | -1.19039 | E11.5 * Wnt1 down vs E11.5 * Ctrl |
| 10577973 Adrb3         | NM_013462    | 0.00321194   | -1.19116 | E11.5 * Wnt1 down vs E11.5 * Ctrl |
| 10398332               | ---          | 0.00340073   | -1.19184 | E11.5 * Wnt1 down vs E11.5 * Ctrl |
| 10584067 Zbtb44        | NM_001115130 | 0.00528732   | -1.19189 | E11.5 * Wnt1 down vs E11.5 * Ctrl |
| 10365714 Sec61g        | NM_011343    | 0.000642401  | -1.19228 | E11.5 * Wnt1 down vs E11.5 * Ctrl |
| 10416522 Tsc22d1       | NM_207652    | 0.000286686  | -1.19239 | E11.5 * Wnt1 down vs E11.5 * Ctrl |
| 10400762 Map4k5        | NM_201519    | 0.00427122   | -1.19253 | E11.5 * Wnt1 down vs E11.5 * Ctrl |
| 10383758 Tug1          | NR_002321    | 0.00624516   | -1.19297 | E11.5 * Wnt1 down vs E11.5 * Ctrl |
| 10447510 Amd1          | NM_009665    | 0.00813711   | -1.19307 | E11.5 * Wnt1 down vs E11.5 * Ctrl |
| 10453678 Zeb1          | NM_011546    | 0.000716078  | -1.1933  | E11.5 * Wnt1 down vs E11.5 * Ctrl |
| 10410016 Fancc         | NM_007985    | 0.00161121   | -1.19336 | E11.5 * Wnt1 down vs E11.5 * Ctrl |
| 10438530 Clcn2         | NM_009900    | 7.76016e-005 | -1.19359 | E11.5 * Wnt1 down vs E11.5 * Ctrl |
| 10568765 Tcerg1l       | NM_183289    | 0.00459601   | -1.19412 | E11.5 * Wnt1 down vs E11.5 * Ctrl |
| 10531342 U90926        | U90926       | 0.00137599   | -1.19413 | E11.5 * Wnt1 down vs E11.5 * Ctrl |
| 10477311 Asxl1         | NM_001039939 | 0.00434032   | -1.19435 | E11.5 * Wnt1 down vs E11.5 * Ctrl |
| 10595871 Clstn2        | NM_022319    | 0.000792067  | -1.19442 | E11.5 * Wnt1 down vs E11.5 * Ctrl |
| 10588326 Nphp3         | NM_028721    | 0.00226426   | -1.19446 | E11.5 * Wnt1 down vs E11.5 * Ctrl |
| 10373502 Ikzf4         | NM_011772    | 0.00809549   | -1.19463 | E11.5 * Wnt1 down vs E11.5 * Ctrl |
| 10498477 E130311K13Rik | NM_177856    | 0.00813944   | -1.19488 | E11.5 * Wnt1 down vs E11.5 * Ctrl |
| 10499552 Efna4         | NM_007910    | 0.0077622    | -1.19578 | E11.5 * Wnt1 down vs E11.5 * Ctrl |
| 10517401 Grhl3         | NM_001013756 | 0.00618225   | -1.19601 | E11.5 * Wnt1 down vs E11.5 * Ctrl |
| 10395163 Lamb1-1       | NM_008482    | 0.00029816   | -1.19607 | E11.5 * Wnt1 down vs E11.5 * Ctrl |
| 10586110 Cln6          | NM_001033175 | 0.00442272   | -1.19609 | E11.5 * Wnt1 down vs E11.5 * Ctrl |
| 10391685 Fam171a2      | NM_199200    | 0.00505354   | -1.19614 | E11.5 * Wnt1 down vs E11.5 * Ctrl |
| 10608089 Ube1y1        | NM_011667    | 0.00644154   | -1.1968  | E11.5 * Wnt1 down vs E11.5 * Ctrl |
| 10398350               | ---          | 0.007653     | -1.19792 | E11.5 * Wnt1 down vs E11.5 * Ctrl |
| 10447417 Msh6          | NM_010830    | 0.00135236   | -1.19814 | E11.5 * Wnt1 down vs E11.5 * Ctrl |
| 10393559 Timpt2        | NM_011594    | 0.000282962  | -1.1982  | E11.5 * Wnt1 down vs E11.5 * Ctrl |
| 10432907 Krt78         | NM_212487    | 0.00600707   | -1.19841 | E11.5 * Wnt1 down vs E11.5 * Ctrl |
| 10546272 Iqsec1        | NM_001134384 | 0.00496337   | -1.19906 | E11.5 * Wnt1 down vs E11.5 * Ctrl |
| 10528177 ENSMUSG0000C  | NM_198666    | 0.000634043  | -1.19908 | E11.5 * Wnt1 down vs E11.5 * Ctrl |
| 10445781 Trem2         | NM_031254    | 0.00301078   | -1.19918 | E11.5 * Wnt1 down vs E11.5 * Ctrl |
| 10424335 Rnf139        | NM_175226    | 0.00151012   | -1.19919 | E11.5 * Wnt1 down vs E11.5 * Ctrl |
| 10608085               | ---          | 0.00639837   | -1.19977 | E11.5 * Wnt1 down vs E11.5 * Ctrl |
| 10480321 A930004D18Rik | ENSMUST00000 | 0.00642684   | -1.19999 | E11.5 * Wnt1 down vs E11.5 * Ctrl |
| 10453939 Lama3         | NM_010680    | 0.00806575   | -1.2001  | E11.5 * Wnt1 down vs E11.5 * Ctrl |
| 10420694 Ints6         | NM_008715    | 0.000187779  | -1.20015 | E11.5 * Wnt1 down vs E11.5 * Ctrl |
| 10457223 Cdh11         | NM_009866    | 0.000117229  | -1.20016 | E11.5 * Wnt1 down vs E11.5 * Ctrl |
| 10553477 Ano5          | NM_177694    | 0.00503728   | -1.20041 | E11.5 * Wnt1 down vs E11.5 * Ctrl |
| 10390974 Krt34         | NM_027563    | 0.00778606   | -1.20068 | E11.5 * Wnt1 down vs E11.5 * Ctrl |
| 10437552 AU021092      | NM_001033220 | 0.00143324   | -1.20094 | E11.5 * Wnt1 down vs E11.5 * Ctrl |
| 10365242 Hcfc2         | NM_001081218 | 0.00822192   | -1.20102 | E11.5 * Wnt1 down vs E11.5 * Ctrl |
| 10358978 Ier5          | NM_010500    | 0.00306044   | -1.20109 | E11.5 * Wnt1 down vs E11.5 * Ctrl |
| 10546417 Trh           | NM_009426    | 0.00664242   | -1.20115 | E11.5 * Wnt1 down vs E11.5 * Ctrl |
| 10356475 Arl4c         | NM_177305    | 0.00326105   | -1.20117 | E11.5 * Wnt1 down vs E11.5 * Ctrl |
| 10480238 St8sia6       | NM_145838    | 0.00632814   | -1.20135 | E11.5 * Wnt1 down vs E11.5 * Ctrl |
| 10595848 Spsb4         | NM_145134    | 0.00594449   | -1.20163 | E11.5 * Wnt1 down vs E11.5 * Ctrl |
| 10512628 Olfr159       | NM_019476    | 0.00177637   | -1.20172 | E11.5 * Wnt1 down vs E11.5 * Ctrl |
| 10421877 Diap3         | NM_019670    | 0.00276156   | -1.20172 | E11.5 * Wnt1 down vs E11.5 * Ctrl |
| 10420889 1110020C17Rik | ENSMUST00000 | 0.00633847   | -1.20254 | E11.5 * Wnt1 down vs E11.5 * Ctrl |
| 10538438 C330043M08Rik | NM_001142781 | 0.00219176   | -1.20257 | E11.5 * Wnt1 down vs E11.5 * Ctrl |
| 10507870               | ---          | 0.00613436   | -1.2026  | E11.5 * Wnt1 down vs E11.5 * Ctrl |
| 10454254 Dtna          | NM_207650    | 0.00719294   | -1.20317 | E11.5 * Wnt1 down vs E11.5 * Ctrl |
| 10371356 Appl2         | NM_145220    | 0.00599523   | -1.20327 | E11.5 * Wnt1 down vs E11.5 * Ctrl |
| 10488608 Trib3         | NM_175093    | 0.00282678   | -1.20331 | E11.5 * Wnt1 down vs E11.5 * Ctrl |
| 10376434 Butr1         | NM_138678    | 0.00447846   | -1.20347 | E11.5 * Wnt1 down vs E11.5 * Ctrl |

|                        |              |              |          |                                   |
|------------------------|--------------|--------------|----------|-----------------------------------|
| 10464171 Tdrd1         | NM_001002238 | 0.0013733    | -1.20357 | E11.5 * Wnt1 down vs E11.5 * Ctrl |
| 10379060 Proca1        | NM_001045516 | 0.00837848   | -1.20373 | E11.5 * Wnt1 down vs E11.5 * Ctrl |
| 10368473               | ---          | 0.00110724   | -1.20443 | E11.5 * Wnt1 down vs E11.5 * Ctrl |
| 10513381 Rod1          | NM_144904    | 6.23335e-005 | -1.2045  | E11.5 * Wnt1 down vs E11.5 * Ctrl |
| 10570291 F10           | NM_007972    | 0.00662933   | -1.20453 | E11.5 * Wnt1 down vs E11.5 * Ctrl |
| 10602009 Rnf128        | NM_023270    | 0.00824187   | -1.20457 | E11.5 * Wnt1 down vs E11.5 * Ctrl |
| 10422781 4921505C17Rik | NM_030168    | 0.00347512   | -1.20496 | E11.5 * Wnt1 down vs E11.5 * Ctrl |
| 10529935               | ---          | 0.00432085   | -1.20506 | E11.5 * Wnt1 down vs E11.5 * Ctrl |
| 10595856 Slc25a36      | NM_138756    | 0.0052557    | -1.20526 | E11.5 * Wnt1 down vs E11.5 * Ctrl |
| 10513320 Ptgr1         | NM_025968    | 0.00148568   | -1.20549 | E11.5 * Wnt1 down vs E11.5 * Ctrl |
| 10562729               | ---          | 0.0027041    | -1.20666 | E11.5 * Wnt1 down vs E11.5 * Ctrl |
| 10489241 Gm826         | NM_001033411 | 0.00789388   | -1.20755 | E11.5 * Wnt1 down vs E11.5 * Ctrl |
| 10454653               | ---          | 0.00300005   | -1.20761 | E11.5 * Wnt1 down vs E11.5 * Ctrl |
| 10377953 Kif1c         | NM_153103    | 0.0015366    | -1.20862 | E11.5 * Wnt1 down vs E11.5 * Ctrl |
| 10443946 1700029I08Rik | NM_183282    | 0.00727437   | -1.2087  | E11.5 * Wnt1 down vs E11.5 * Ctrl |
| 10344772 6030422M02Rik | NM_177722    | 0.00408959   | -1.20925 | E11.5 * Wnt1 down vs E11.5 * Ctrl |
| 10597162 Klhl18        | NM_177771    | 0.00144045   | -1.20936 | E11.5 * Wnt1 down vs E11.5 * Ctrl |
| 10399383 Kcns3         | NM_173417    | 0.00550894   | -1.20937 | E11.5 * Wnt1 down vs E11.5 * Ctrl |
| 10509280 Hspg2         | NM_008305    | 0.00303805   | -1.20941 | E11.5 * Wnt1 down vs E11.5 * Ctrl |
| 10497613 ENSMUSG00000  | ENSMUST00000 | 0.00256152   | -1.20957 | E11.5 * Wnt1 down vs E11.5 * Ctrl |
| 10436804 Mrap          | NM_029844    | 0.00048874   | -1.20981 | E11.5 * Wnt1 down vs E11.5 * Ctrl |
| 10538150 Tmem176a      | NM_025326    | 0.00414552   | -1.21008 | E11.5 * Wnt1 down vs E11.5 * Ctrl |
| 10561247 Shkbp1        | NM_138676    | 0.00568111   | -1.21027 | E11.5 * Wnt1 down vs E11.5 * Ctrl |
| 10409905 Ctsr          | NM_020284    | 0.00391719   | -1.21037 | E11.5 * Wnt1 down vs E11.5 * Ctrl |
| 10588154 Stag1         | NM_009282    | 0.00574313   | -1.21146 | E11.5 * Wnt1 down vs E11.5 * Ctrl |
| 10561525 ENSMUSG00000  | ENSMUST00000 | 0.00464773   | -1.21154 | E11.5 * Wnt1 down vs E11.5 * Ctrl |
| 10587383 Cd109         | NM_153098    | 0.00175281   | -1.21157 | E11.5 * Wnt1 down vs E11.5 * Ctrl |
| 10552632 Shank1        | ENSMUST00000 | 0.000647525  | -1.21163 | E11.5 * Wnt1 down vs E11.5 * Ctrl |
| 10428103 Stk3          | NM_019635    | 0.00345347   | -1.21194 | E11.5 * Wnt1 down vs E11.5 * Ctrl |
| 10571371 Tusc3         | NM_030254    | 0.000269553  | -1.21254 | E11.5 * Wnt1 down vs E11.5 * Ctrl |
| 10356423 Usp40         | NM_001033291 | 0.00669629   | -1.21277 | E11.5 * Wnt1 down vs E11.5 * Ctrl |
| 10412394 Nnt           | NR_003544    | 0.00627595   | -1.21342 | E11.5 * Wnt1 down vs E11.5 * Ctrl |
| 10348424 Sh3bp4        | NM_133816    | 0.00362267   | -1.21344 | E11.5 * Wnt1 down vs E11.5 * Ctrl |
| 10484575 Olfr1048      | NM_147014    | 0.0010152    | -1.21365 | E11.5 * Wnt1 down vs E11.5 * Ctrl |
| 10582337 Fam38a        | ENSMUST00000 | 0.00451143   | -1.21374 | E11.5 * Wnt1 down vs E11.5 * Ctrl |
| 10542857 Far2          | NM_178797    | 0.00434838   | -1.21395 | E11.5 * Wnt1 down vs E11.5 * Ctrl |
| 10357043 Bcl2          | NM_009741    | 0.00112169   | -1.21461 | E11.5 * Wnt1 down vs E11.5 * Ctrl |
| 10394846 LOC100043371  | ENSMUST00000 | 0.00608199   | -1.21471 | E11.5 * Wnt1 down vs E11.5 * Ctrl |
| 10529052 Slc5a6        | NM_177870    | 0.00215902   | -1.21501 | E11.5 * Wnt1 down vs E11.5 * Ctrl |
| 10442139 EG665525      | XM_977557    | 0.0028918    | -1.21519 | E11.5 * Wnt1 down vs E11.5 * Ctrl |
| 10519060 Tnfrsf14      | NM_178931    | 0.00409315   | -1.21571 | E11.5 * Wnt1 down vs E11.5 * Ctrl |
| 10491056 Tbl1xr1       | NM_030732    | 0.00548738   | -1.21623 | E11.5 * Wnt1 down vs E11.5 * Ctrl |
| 10437970 2310008H04Rik | NM_146068    | 0.000326764  | -1.21696 | E11.5 * Wnt1 down vs E11.5 * Ctrl |
| 10495562 Lrrc39        | NM_175413    | 0.00192158   | -1.21701 | E11.5 * Wnt1 down vs E11.5 * Ctrl |
| 10570786 Thsd1         | NM_019576    | 0.00351819   | -1.2175  | E11.5 * Wnt1 down vs E11.5 * Ctrl |
| 10500847 Magi3         | NM_133853    | 0.00648502   | -1.2178  | E11.5 * Wnt1 down vs E11.5 * Ctrl |
| 10451061 Runx2         | NM_001146038 | 0.00265169   | -1.21801 | E11.5 * Wnt1 down vs E11.5 * Ctrl |
| 10553042 Rasip1        | NM_028544    | 0.00674666   | -1.21843 | E11.5 * Wnt1 down vs E11.5 * Ctrl |
| 10389207 Ccl5          | NM_013653    | 0.00170939   | -1.2186  | E11.5 * Wnt1 down vs E11.5 * Ctrl |
| 10508074 Csf3r         | NM_007782    | 0.00388058   | -1.21868 | E11.5 * Wnt1 down vs E11.5 * Ctrl |
| 10510201 Rex2          | NM_009051    | 0.0060737    | -1.21884 | E11.5 * Wnt1 down vs E11.5 * Ctrl |
| 10453178 Map4k3        | NM_001081357 | 0.00139033   | -1.21895 | E11.5 * Wnt1 down vs E11.5 * Ctrl |
| 10392863 Grin2c        | NM_010350    | 0.00418428   | -1.21929 | E11.5 * Wnt1 down vs E11.5 * Ctrl |
| 10409376 Hk3           | NM_001033245 | 0.00757456   | -1.21943 | E11.5 * Wnt1 down vs E11.5 * Ctrl |
| 10565218 Il16          | NM_010551    | 0.00666661   | -1.21954 | E11.5 * Wnt1 down vs E11.5 * Ctrl |
| 10345877 ENSMUSG00000  | ENSMUST00000 | 0.00600573   | -1.22    | E11.5 * Wnt1 down vs E11.5 * Ctrl |
| 10482868 Wdsub1        | NM_028118    | 0.00343555   | -1.22007 | E11.5 * Wnt1 down vs E11.5 * Ctrl |
| 10372385 Zdhhc17       | NM_172554    | 0.00544595   | -1.22014 | E11.5 * Wnt1 down vs E11.5 * Ctrl |
| 10459944 Nfatc1        | NM_198429    | 0.00512814   | -1.22072 | E11.5 * Wnt1 down vs E11.5 * Ctrl |
| 10450384 Msh5          | NM_013600    | 0.00548451   | -1.22075 | E11.5 * Wnt1 down vs E11.5 * Ctrl |
| 10536827 Ccdc136       | BC006583     | 0.00123358   | -1.22154 | E11.5 * Wnt1 down vs E11.5 * Ctrl |
| 10489372 0610008F07Rik | BC025862     | 0.00431743   | -1.22187 | E11.5 * Wnt1 down vs E11.5 * Ctrl |
| 10555729 Olfr555       | NM_147103    | 0.000101524  | -1.22226 | E11.5 * Wnt1 down vs E11.5 * Ctrl |
| 10595664 Tmed3         | NM_025360    | 0.00359509   | -1.22273 | E11.5 * Wnt1 down vs E11.5 * Ctrl |
| 10532040 Zfp644        | NM_026856    | 0.000423381  | -1.22276 | E11.5 * Wnt1 down vs E11.5 * Ctrl |
| 10423080 C1qtnf3       | NM_030888    | 0.00209937   | -1.22315 | E11.5 * Wnt1 down vs E11.5 * Ctrl |

|          |               |              |             |          |                                   |
|----------|---------------|--------------|-------------|----------|-----------------------------------|
| 10394819 | LOC677565     | XR_034928    | 0.00721774  | -1.22325 | E11.5 * Wnt1 down vs E11.5 * Ctrl |
| 10395103 | Pxdn          | NM_181395    | 0.00741927  | -1.22334 | E11.5 * Wnt1 down vs E11.5 * Ctrl |
| 10446376 | Man2a1        | NM_008549    | 0.00320082  | -1.22388 | E11.5 * Wnt1 down vs E11.5 * Ctrl |
| 10365716 | 1200009F10Rik | NM_026166    | 0.00477662  | -1.22396 | E11.5 * Wnt1 down vs E11.5 * Ctrl |
| 10570614 | Defb6         | NM_054074    | 0.00141242  | -1.22409 | E11.5 * Wnt1 down vs E11.5 * Ctrl |
| 10551531 | Sycn          | NM_026716    | 0.00883251  | -1.22421 | E11.5 * Wnt1 down vs E11.5 * Ctrl |
| 10599435 | Ocl           | NM_177215    | 0.00124578  | -1.22453 | E11.5 * Wnt1 down vs E11.5 * Ctrl |
| 10599296 | Rhox6         | NM_008955    | 0.00696453  | -1.2257  | E11.5 * Wnt1 down vs E11.5 * Ctrl |
| 10510241 | OTTMUSG00000  | NM_001014397 | 0.00315224  | -1.22577 | E11.5 * Wnt1 down vs E11.5 * Ctrl |
| 10346843 | Nrp2          | NM_001077403 | 0.00405217  | -1.22585 | E11.5 * Wnt1 down vs E11.5 * Ctrl |
| 10512499 | Tpm2          | NM_009416    | 0.00344729  | -1.22621 | E11.5 * Wnt1 down vs E11.5 * Ctrl |
| 10452998 | Sult6b1       | ENSMUST00000 | 0.0075723   | -1.22679 | E11.5 * Wnt1 down vs E11.5 * Ctrl |
| 10359086 | Cep350        | BC089561     | 0.00283462  | -1.22771 | E11.5 * Wnt1 down vs E11.5 * Ctrl |
| 10537676 | 1700034O15Rik | BC048592     | 0.00435025  | -1.22778 | E11.5 * Wnt1 down vs E11.5 * Ctrl |
| 10511984 | 1700003M02Rik | NM_027041    | 0.00276017  | -1.22793 | E11.5 * Wnt1 down vs E11.5 * Ctrl |
| 10501676 | Hiat1         | NM_008246    | 0.00862704  | -1.22827 | E11.5 * Wnt1 down vs E11.5 * Ctrl |
| 10576027 | ENSMUSG00000  | ENSMUST00000 | 0.000455243 | -1.22834 | E11.5 * Wnt1 down vs E11.5 * Ctrl |
| 10435237 | Zfp148        | NM_011749    | 0.000533328 | -1.22838 | E11.5 * Wnt1 down vs E11.5 * Ctrl |
| 10450374 | D17H6S56E-5   | L78788       | 0.00763964  | -1.22881 | E11.5 * Wnt1 down vs E11.5 * Ctrl |
| 10410279 | ---           | ---          | 0.00286305  | -1.22907 | E11.5 * Wnt1 down vs E11.5 * Ctrl |
| 10361834 | Txlnb         | NM_138628    | 0.00628297  | -1.2293  | E11.5 * Wnt1 down vs E11.5 * Ctrl |
| 10372342 | Nav3          | NM_001081035 | 0.00603261  | -1.22932 | E11.5 * Wnt1 down vs E11.5 * Ctrl |
| 10465783 | Tmem179b      | NM_026325    | 0.000981906 | -1.22955 | E11.5 * Wnt1 down vs E11.5 * Ctrl |
| 10585318 | Rdx           | NM_001104617 | 0.00131057  | -1.2296  | E11.5 * Wnt1 down vs E11.5 * Ctrl |
| 10439854 | Bbx           | NM_027444    | 0.00678076  | -1.22963 | E11.5 * Wnt1 down vs E11.5 * Ctrl |
| 10507655 | ---           | ---          | 0.00173256  | -1.22964 | E11.5 * Wnt1 down vs E11.5 * Ctrl |
| 10407173 | Il6st         | NM_010560    | 0.000721471 | -1.2301  | E11.5 * Wnt1 down vs E11.5 * Ctrl |
| 10565591 | OTTMUSG00000  | ENSMUST00000 | 0.000416675 | -1.2303  | E11.5 * Wnt1 down vs E11.5 * Ctrl |
| 10605421 | Mtcp1         | NM_001039373 | 0.000399497 | -1.23042 | E11.5 * Wnt1 down vs E11.5 * Ctrl |
| 10594825 | Aqp9          | NM_022026    | 0.000344338 | -1.23048 | E11.5 * Wnt1 down vs E11.5 * Ctrl |
| 10579744 | Large         | NM_010687    | 0.00205077  | -1.23057 | E11.5 * Wnt1 down vs E11.5 * Ctrl |
| 10492006 | Trpc4         | NM_016984    | 0.00487818  | -1.23066 | E11.5 * Wnt1 down vs E11.5 * Ctrl |
| 10472501 | Lass6         | NM_172856    | 0.000269544 | -1.23088 | E11.5 * Wnt1 down vs E11.5 * Ctrl |
| 10349431 | Acmsd         | NM_001033041 | 0.00340265  | -1.2311  | E11.5 * Wnt1 down vs E11.5 * Ctrl |
| 10563355 | Sec1          | NM_019934    | 0.00231148  | -1.23126 | E11.5 * Wnt1 down vs E11.5 * Ctrl |
| 10577412 | 6820431F20Rik | BC025151     | 0.0001647   | -1.23188 | E11.5 * Wnt1 down vs E11.5 * Ctrl |
| 10594251 | Kif23         | NM_024245    | 0.0020151   | -1.23234 | E11.5 * Wnt1 down vs E11.5 * Ctrl |
| 10385870 | Irf1          | NM_008390    | 0.000657142 | -1.23237 | E11.5 * Wnt1 down vs E11.5 * Ctrl |
| 10451372 | Ptk7          | NM_175168    | 0.000286434 | -1.23254 | E11.5 * Wnt1 down vs E11.5 * Ctrl |
| 10345752 | Il1r2         | NM_010555    | 0.00717014  | -1.23281 | E11.5 * Wnt1 down vs E11.5 * Ctrl |
| 10602925 | Phka2         | NM_172783    | 0.00721455  | -1.23288 | E11.5 * Wnt1 down vs E11.5 * Ctrl |
| 10568638 | Uros          | NM_009479    | 0.000551966 | -1.23325 | E11.5 * Wnt1 down vs E11.5 * Ctrl |
| 10513186 | OTTMUSG00000  | XM_884359    | 0.00804817  | -1.23327 | E11.5 * Wnt1 down vs E11.5 * Ctrl |
| 10435832 | Gm608         | NM_001029889 | 0.000237731 | -1.23364 | E11.5 * Wnt1 down vs E11.5 * Ctrl |
| 10530151 | Tlr6          | NM_011604    | 0.000978423 | -1.23364 | E11.5 * Wnt1 down vs E11.5 * Ctrl |
| 10606530 | ---           | ---          | 0.00144658  | -1.23364 | E11.5 * Wnt1 down vs E11.5 * Ctrl |
| 10593430 | Sik2          | NM_178710    | 0.00236348  | -1.23386 | E11.5 * Wnt1 down vs E11.5 * Ctrl |
| 10514666 | ---           | ---          | 0.00755054  | -1.23415 | E11.5 * Wnt1 down vs E11.5 * Ctrl |
| 10555873 | Olfr652       | NM_147048    | 0.00481661  | -1.23425 | E11.5 * Wnt1 down vs E11.5 * Ctrl |
| 10493292 | 2810403A07Rik | AK173057     | 0.000261646 | -1.23438 | E11.5 * Wnt1 down vs E11.5 * Ctrl |
| 10433101 | Gpr84         | NM_030720    | 0.00454207  | -1.23463 | E11.5 * Wnt1 down vs E11.5 * Ctrl |
| 10591112 | Fat3          | NM_001080814 | 0.00166147  | -1.23467 | E11.5 * Wnt1 down vs E11.5 * Ctrl |
| 10578681 | ---           | ---          | 0.00450462  | -1.23502 | E11.5 * Wnt1 down vs E11.5 * Ctrl |
| 10565840 | Neu3          | NM_016720    | 0.00226737  | -1.23516 | E11.5 * Wnt1 down vs E11.5 * Ctrl |
| 10375232 | ---           | ---          | 0.00337395  | -1.2353  | E11.5 * Wnt1 down vs E11.5 * Ctrl |
| 10381408 | Ifi35         | NM_027320    | 0.00467257  | -1.23541 | E11.5 * Wnt1 down vs E11.5 * Ctrl |
| 10488465 | Zfp345        | NM_001034900 | 0.00303574  | -1.23611 | E11.5 * Wnt1 down vs E11.5 * Ctrl |
| 10357480 | Daf2          | NM_007827    | 0.00487936  | -1.23678 | E11.5 * Wnt1 down vs E11.5 * Ctrl |
| 10513162 | Ptpn3         | NM_011207    | 0.00813044  | -1.23703 | E11.5 * Wnt1 down vs E11.5 * Ctrl |
| 10592629 | Grik4         | NM_175481    | 0.0029394   | -1.23751 | E11.5 * Wnt1 down vs E11.5 * Ctrl |
| 10548146 | Tead4         | NM_011567    | 0.00157949  | -1.23797 | E11.5 * Wnt1 down vs E11.5 * Ctrl |
| 10544779 | Hoxa7         | NM_010455    | 0.00132073  | -1.23803 | E11.5 * Wnt1 down vs E11.5 * Ctrl |
| 10528191 | Speer4d       | NM_025759    | 0.00062083  | -1.2383  | E11.5 * Wnt1 down vs E11.5 * Ctrl |
| 10456383 | Impa2         | NM_053261    | 0.000989053 | -1.23836 | E11.5 * Wnt1 down vs E11.5 * Ctrl |
| 10473356 | Ube2l6        | NM_019949    | 0.00384197  | -1.2388  | E11.5 * Wnt1 down vs E11.5 * Ctrl |
| 10542104 | ENSMUSG00000  | ENSMUST00000 | 0.00420019  | -1.23891 | E11.5 * Wnt1 down vs E11.5 * Ctrl |

|                        |              |              |          |                                   |
|------------------------|--------------|--------------|----------|-----------------------------------|
| 10532711 Cmlr1         | NM_008153    | 0.00886315   | -1.23927 | E11.5 * Wnt1 down vs E11.5 * Ctrl |
| 10356082 Plscr1        | NM_011636    | 0.00578465   | -1.23945 | E11.5 * Wnt1 down vs E11.5 * Ctrl |
| 10500434 Bcl9          | NM_029933    | 0.00173969   | -1.23945 | E11.5 * Wnt1 down vs E11.5 * Ctrl |
| 10383511 Tex19.1       | AF285590     | 0.00172099   | -1.23973 | E11.5 * Wnt1 down vs E11.5 * Ctrl |
| 10573419 Lyl1          | NM_008535    | 0.00153075   | -1.24007 | E11.5 * Wnt1 down vs E11.5 * Ctrl |
| 10593913 1700017B05Rik | NM_028820    | 0.00579811   | -1.24036 | E11.5 * Wnt1 down vs E11.5 * Ctrl |
| 10545096 2410003J06Rik | NM_028025    | 0.00236199   | -1.24036 | E11.5 * Wnt1 down vs E11.5 * Ctrl |
| 10491522 A330050B17Rik | AK138522     | 0.00322854   | -1.24041 | E11.5 * Wnt1 down vs E11.5 * Ctrl |
| 10600786 Khlh15        | NM_001039060 | 0.00276088   | -1.24082 | E11.5 * Wnt1 down vs E11.5 * Ctrl |
| 10501051 Cept1         | NM_133869    | 0.00466618   | -1.24126 | E11.5 * Wnt1 down vs E11.5 * Ctrl |
| 10463224 Marveld1      | BC054384     | 0.00297929   | -1.24145 | E11.5 * Wnt1 down vs E11.5 * Ctrl |
| 10412267 Itga2         | NM_008396    | 0.00871117   | -1.24152 | E11.5 * Wnt1 down vs E11.5 * Ctrl |
| 10510399 Masp2         | NM_001003893 | 0.00762569   | -1.24178 | E11.5 * Wnt1 down vs E11.5 * Ctrl |
| 10377537 Chd3          | NM_146019    | 8.26696e-006 | -1.24184 | E11.5 * Wnt1 down vs E11.5 * Ctrl |
| 10380398 Chad          | NM_007689    | 0.000675103  | -1.24191 | E11.5 * Wnt1 down vs E11.5 * Ctrl |
| 10474045 Chst1         | NM_023850    | 0.00729525   | -1.24243 | E11.5 * Wnt1 down vs E11.5 * Ctrl |
| 10601412 Lpar4         | NM_175271    | 0.000749545  | -1.2426  | E11.5 * Wnt1 down vs E11.5 * Ctrl |
| 10607143 Capn6         | NM_007603    | 0.0015598    | -1.24267 | E11.5 * Wnt1 down vs E11.5 * Ctrl |
| 10569313 6330512M04Rik | NM_177265    | 0.00536628   | -1.24304 | E11.5 * Wnt1 down vs E11.5 * Ctrl |
| 10592719 Oaf           | NM_178644    | 0.000285437  | -1.2432  | E11.5 * Wnt1 down vs E11.5 * Ctrl |
| 10367036 Rdh1          | NM_080436    | 0.00451187   | -1.24331 | E11.5 * Wnt1 down vs E11.5 * Ctrl |
| 10389783 ENSMUSG0000C  | ENSMUST00000 | 0.00711794   | -1.24337 | E11.5 * Wnt1 down vs E11.5 * Ctrl |
| 10516221 D130007C19Rik | AK051152     | 0.00423      | -1.2439  | E11.5 * Wnt1 down vs E11.5 * Ctrl |
| 10397606 Tshr          | NM_011648    | 0.00570134   | -1.2444  | E11.5 * Wnt1 down vs E11.5 * Ctrl |
| 10359648 Scyl3         | NM_028776    | 5.72803e-005 | -1.24471 | E11.5 * Wnt1 down vs E11.5 * Ctrl |
| 10403229 Itgb8         | NM_177290    | 0.00586944   | -1.24477 | E11.5 * Wnt1 down vs E11.5 * Ctrl |
| 10473107               | ---          | 0.00543073   | -1.24504 | E11.5 * Wnt1 down vs E11.5 * Ctrl |
| 10539873 Gata2         | NM_008090    | 0.00216498   | -1.24525 | E11.5 * Wnt1 down vs E11.5 * Ctrl |
| 10411595 Naip2         | NM_010872    | 0.00114979   | -1.24535 | E11.5 * Wnt1 down vs E11.5 * Ctrl |
| 10559177 B130016D09Rik | AK044960     | 0.00696544   | -1.24552 | E11.5 * Wnt1 down vs E11.5 * Ctrl |
| 10576034 Irf8          | NM_008320    | 0.000464076  | -1.24602 | E11.5 * Wnt1 down vs E11.5 * Ctrl |
| 10604735 RbmX          | NM_011252    | 0.00666176   | -1.24676 | E11.5 * Wnt1 down vs E11.5 * Ctrl |
| 10375886 D930048N14Rik | BC095931     | 0.00079704   | -1.24717 | E11.5 * Wnt1 down vs E11.5 * Ctrl |
| 10518967 1190007F08Rik | ENSMUST00000 | 0.000286047  | -1.24734 | E11.5 * Wnt1 down vs E11.5 * Ctrl |
| 10366739               | ---          | 0.00345815   | -1.24749 | E11.5 * Wnt1 down vs E11.5 * Ctrl |
| 10600777 AU015836      | BC141215     | 0.00290247   | -1.2478  | E11.5 * Wnt1 down vs E11.5 * Ctrl |
| 10448878 Baiap3        | BC158116     | 0.000412087  | -1.24814 | E11.5 * Wnt1 down vs E11.5 * Ctrl |
| 10428753               | ---          | 0.00413844   | -1.24822 | E11.5 * Wnt1 down vs E11.5 * Ctrl |
| 10515385 Urod          | NM_009478    | 0.00107834   | -1.24835 | E11.5 * Wnt1 down vs E11.5 * Ctrl |
| 10465990 Tmem216       | NM_026798    | 0.00755672   | -1.24846 | E11.5 * Wnt1 down vs E11.5 * Ctrl |
| 10415013               | ---          | 0.00316072   | -1.24848 | E11.5 * Wnt1 down vs E11.5 * Ctrl |
| 10585992 Myo9a         | BC096035     | 0.00583914   | -1.2486  | E11.5 * Wnt1 down vs E11.5 * Ctrl |
| 10446986 Crim1         | NM_015800    | 0.00601887   | -1.24865 | E11.5 * Wnt1 down vs E11.5 * Ctrl |
| 10454103               | ---          | 0.000635859  | -1.24895 | E11.5 * Wnt1 down vs E11.5 * Ctrl |
| 10605351               | ---          | 0.000655148  | -1.24932 | E11.5 * Wnt1 down vs E11.5 * Ctrl |
| 10437928 0610037P05Rik | BC011300     | 0.000449933  | -1.24974 | E11.5 * Wnt1 down vs E11.5 * Ctrl |
| 10399290 4930417G10Rik | NM_029107    | 0.00364087   | -1.25022 | E11.5 * Wnt1 down vs E11.5 * Ctrl |
| 10382698 1110017F19Rik | ENSMUST00000 | 0.000997744  | -1.25055 | E11.5 * Wnt1 down vs E11.5 * Ctrl |
| 10504132 Ccl19         | NM_011888    | 0.00482285   | -1.25059 | E11.5 * Wnt1 down vs E11.5 * Ctrl |
| 10349769               | ---          | 0.00389182   | -1.25119 | E11.5 * Wnt1 down vs E11.5 * Ctrl |
| 10491629 4932438A13Rik | NM_172679    | 0.00386749   | -1.25149 | E11.5 * Wnt1 down vs E11.5 * Ctrl |
| 10507773               | ---          | 0.00861179   | -1.25158 | E11.5 * Wnt1 down vs E11.5 * Ctrl |
| 10346799 Icos          | NM_017480    | 0.00220171   | -1.25175 | E11.5 * Wnt1 down vs E11.5 * Ctrl |
| 10399202 Macc1         | ENSMUST00000 | 0.0065928    | -1.25191 | E11.5 * Wnt1 down vs E11.5 * Ctrl |
| 10394829               | ---          | 0.00204482   | -1.25196 | E11.5 * Wnt1 down vs E11.5 * Ctrl |
| 10516765 Serinc2       | NM_172702    | 0.00309528   | -1.25234 | E11.5 * Wnt1 down vs E11.5 * Ctrl |
| 10481312 1700026L06Rik | NM_027283    | 0.00549974   | -1.25277 | E11.5 * Wnt1 down vs E11.5 * Ctrl |
| 10355329 Bard1         | NM_007525    | 0.0028855    | -1.25298 | E11.5 * Wnt1 down vs E11.5 * Ctrl |
| 10576973 Col4a1        | NM_009931    | 7.99377e-005 | -1.25305 | E11.5 * Wnt1 down vs E11.5 * Ctrl |
| 10499612 Zbtb7b        | NM_009565    | 0.00837649   | -1.25308 | E11.5 * Wnt1 down vs E11.5 * Ctrl |
| 10606362               | ---          | 0.00434302   | -1.25311 | E11.5 * Wnt1 down vs E11.5 * Ctrl |
| 10370210 Col6a1        | NM_009933    | 0.00277863   | -1.25313 | E11.5 * Wnt1 down vs E11.5 * Ctrl |
| 10591988 Adamts15      | NM_001024139 | 0.00878847   | -1.25343 | E11.5 * Wnt1 down vs E11.5 * Ctrl |
| 10372082 Nudt4         | NM_027722    | 0.00079919   | -1.25349 | E11.5 * Wnt1 down vs E11.5 * Ctrl |
| 10374621 Ahsa2         | NM_172391    | 4.98623e-005 | -1.2543  | E11.5 * Wnt1 down vs E11.5 * Ctrl |
| 10363868 Fam13c        | NM_024244    | 0.00104083   | -1.25461 | E11.5 * Wnt1 down vs E11.5 * Ctrl |

|                        |              |              |          |                                   |
|------------------------|--------------|--------------|----------|-----------------------------------|
| 10404731 Tmem14c       | NM_025387    | 0.00113894   | -1.25503 | E11.5 * Wnt1 down vs E11.5 * Ctrl |
| 10378523 Smg6          | NM_001002764 | 0.00432695   | -1.25557 | E11.5 * Wnt1 down vs E11.5 * Ctrl |
| 10417704 Lrrc3b        | NM_146052    | 0.00794505   | -1.25576 | E11.5 * Wnt1 down vs E11.5 * Ctrl |
| 10533446 Tect1         | NM_001039153 | 0.00333994   | -1.25584 | E11.5 * Wnt1 down vs E11.5 * Ctrl |
| 10551696 Rasgrp4       | NM_145149    | 0.000377545  | -1.25679 | E11.5 * Wnt1 down vs E11.5 * Ctrl |
| 10548375 Clec7a        | NM_020008    | 0.00349033   | -1.25759 | E11.5 * Wnt1 down vs E11.5 * Ctrl |
| 10560139 B430211C08Rik | NM_001039146 | 0.000586583  | -1.25788 | E11.5 * Wnt1 down vs E11.5 * Ctrl |
| 10554586 4833418N17Rik | AK080712     | 0.00734127   | -1.258   | E11.5 * Wnt1 down vs E11.5 * Ctrl |
| 10426999 Acvrl1        | NM_009612    | 0.00868421   | -1.25818 | E11.5 * Wnt1 down vs E11.5 * Ctrl |
| 10555186 Wnt11         | NM_009519    | 0.00117396   | -1.25818 | E11.5 * Wnt1 down vs E11.5 * Ctrl |
| 10548701 Lrp6          | NM_008514    | 0.00175742   | -1.25838 | E11.5 * Wnt1 down vs E11.5 * Ctrl |
| 10375815               | ---          | 0.00230842   | -1.25841 | E11.5 * Wnt1 down vs E11.5 * Ctrl |
| 10500103 Gabpb2        | NM_029885    | 2.88041e-005 | -1.25894 | E11.5 * Wnt1 down vs E11.5 * Ctrl |
| 10575534 St3gal2       | NM_009179    | 0.000219491  | -1.25926 | E11.5 * Wnt1 down vs E11.5 * Ctrl |
| 10407929 Pou6f2        | NM_175006    | 0.00204465   | -1.25953 | E11.5 * Wnt1 down vs E11.5 * Ctrl |
| 10543600 Kcp           | NM_001029985 | 0.000598979  | -1.25954 | E11.5 * Wnt1 down vs E11.5 * Ctrl |
| 10575160 Nfat5         | NM_133957    | 0.000153388  | -1.25979 | E11.5 * Wnt1 down vs E11.5 * Ctrl |
| 10551102 Prr19         | NM_001081294 | 0.00860285   | -1.25987 | E11.5 * Wnt1 down vs E11.5 * Ctrl |
| 10578504 1700029J07Rik | NM_001033148 | 0.00675638   | -1.25998 | E11.5 * Wnt1 down vs E11.5 * Ctrl |
| 10399314 Gm1964        | NM_001033488 | 0.00174093   | -1.26    | E11.5 * Wnt1 down vs E11.5 * Ctrl |
| 10394812               | ---          | 0.000750872  | -1.26039 | E11.5 * Wnt1 down vs E11.5 * Ctrl |
| 10494565 Fmo5          | NM_010232    | 0.00345701   | -1.26041 | E11.5 * Wnt1 down vs E11.5 * Ctrl |
| 10447065 Fam82a1       | NM_201361    | 0.00091904   | -1.26051 | E11.5 * Wnt1 down vs E11.5 * Ctrl |
| 10396485 Syne2         | NM_001005510 | 6.32165e-005 | -1.26062 | E11.5 * Wnt1 down vs E11.5 * Ctrl |
| 10347593 Speg          | NM_007463    | 0.000967004  | -1.26083 | E11.5 * Wnt1 down vs E11.5 * Ctrl |
| 10598178 Disp1         | NM_026866    | 0.00135403   | -1.26104 | E11.5 * Wnt1 down vs E11.5 * Ctrl |
| 10514193               | ---          | 0.00658533   | -1.26124 | E11.5 * Wnt1 down vs E11.5 * Ctrl |
| 10432294 C430014K11Rik | ENSMUST00000 | 0.00141238   | -1.26152 | E11.5 * Wnt1 down vs E11.5 * Ctrl |
| 10425138 Sh3bp1        | NM_009164    | 0.00010861   | -1.26168 | E11.5 * Wnt1 down vs E11.5 * Ctrl |
| 10491621 4932438A13Rik | NM_172679    | 0.00715599   | -1.26205 | E11.5 * Wnt1 down vs E11.5 * Ctrl |
| 10603026 Ctps2         | NM_018737    | 0.000164429  | -1.2621  | E11.5 * Wnt1 down vs E11.5 * Ctrl |
| 10524844 Taok3         | NM_001081308 | 0.00117874   | -1.26221 | E11.5 * Wnt1 down vs E11.5 * Ctrl |
| 10578045 Nrg1          | NM_178591    | 0.000583013  | -1.26222 | E11.5 * Wnt1 down vs E11.5 * Ctrl |
| 10358299 EG214403      | NM_001029977 | 0.00108305   | -1.26256 | E11.5 * Wnt1 down vs E11.5 * Ctrl |
| 10571321 Ppp1r3b       | NM_177741    | 0.00173348   | -1.26257 | E11.5 * Wnt1 down vs E11.5 * Ctrl |
| 10565193 Hdgfrp3       | NM_013886    | 0.000779131  | -1.26284 | E11.5 * Wnt1 down vs E11.5 * Ctrl |
| 10434942 Dlg1          | NM_007862    | 0.000497802  | -1.26303 | E11.5 * Wnt1 down vs E11.5 * Ctrl |
| 10555425 Fam168a       | BC079886     | 2.34786e-005 | -1.2633  | E11.5 * Wnt1 down vs E11.5 * Ctrl |
| 10525158 Oas1b         | NR_003507    | 0.00207263   | -1.26334 | E11.5 * Wnt1 down vs E11.5 * Ctrl |
| 10354111 Aff3          | NM_010678    | 0.00301045   | -1.26358 | E11.5 * Wnt1 down vs E11.5 * Ctrl |
| 10536908 Tspan33       | NM_146173    | 0.000612783  | -1.26364 | E11.5 * Wnt1 down vs E11.5 * Ctrl |
| 10383210               | ---          | 0.000516875  | -1.26423 | E11.5 * Wnt1 down vs E11.5 * Ctrl |
| 10382425 Gprc5c        | NM_001110337 | 0.000822423  | -1.26436 | E11.5 * Wnt1 down vs E11.5 * Ctrl |
| 10515819               | ---          | 0.000781306  | -1.26494 | E11.5 * Wnt1 down vs E11.5 * Ctrl |
| 10360858 C130074G19Rik | NM_178692    | 0.004546     | -1.26541 | E11.5 * Wnt1 down vs E11.5 * Ctrl |
| 10385234               | ---          | 0.00502776   | -1.26541 | E11.5 * Wnt1 down vs E11.5 * Ctrl |
| 10511975 Slc35a1       | NM_011895    | 0.00752416   | -1.26562 | E11.5 * Wnt1 down vs E11.5 * Ctrl |
| 10484630 Olfr1090      | NM_146847    | 0.00355319   | -1.2658  | E11.5 * Wnt1 down vs E11.5 * Ctrl |
| 10421029 Cdca2         | NM_175384    | 0.000160619  | -1.26583 | E11.5 * Wnt1 down vs E11.5 * Ctrl |
| 10447224 Dync2li1      | NM_172256    | 0.0042635    | -1.26589 | E11.5 * Wnt1 down vs E11.5 * Ctrl |
| 10560655 Bcam          | NM_020486    | 0.00404143   | -1.26606 | E11.5 * Wnt1 down vs E11.5 * Ctrl |
| 10353947 Tmem131       | NM_018872    | 2.99333e-006 | -1.26638 | E11.5 * Wnt1 down vs E11.5 * Ctrl |
| 10537410 Tbxas1        | NM_011539    | 0.00138365   | -1.2665  | E11.5 * Wnt1 down vs E11.5 * Ctrl |
| 10431894 Slc38a2       | NM_175121    | 0.000424634  | -1.26664 | E11.5 * Wnt1 down vs E11.5 * Ctrl |
| 10605651 4930415L06Rik | ENSMUST00000 | 0.000627447  | -1.26669 | E11.5 * Wnt1 down vs E11.5 * Ctrl |
| 10378240 P2rx1         | NM_008771    | 0.000376764  | -1.26674 | E11.5 * Wnt1 down vs E11.5 * Ctrl |
| 10493789 S100a13       | NM_009113    | 0.0002964    | -1.26677 | E11.5 * Wnt1 down vs E11.5 * Ctrl |
| 10400708               | ---          | 0.00489251   | -1.26733 | E11.5 * Wnt1 down vs E11.5 * Ctrl |
| 10596912 Klhdc8b       | NM_030075    | 0.00498065   | -1.26735 | E11.5 * Wnt1 down vs E11.5 * Ctrl |
| 10590801 Birc3         | NM_007464    | 0.00236778   | -1.26739 | E11.5 * Wnt1 down vs E11.5 * Ctrl |
| 10487321 2010106G01Rik | NM_023220    | 0.000842167  | -1.26789 | E11.5 * Wnt1 down vs E11.5 * Ctrl |
| 10546024 Prokr1        | NM_021381    | 0.00326241   | -1.26796 | E11.5 * Wnt1 down vs E11.5 * Ctrl |
| 10414548 Rnase6        | NM_030098    | 0.00372173   | -1.26806 | E11.5 * Wnt1 down vs E11.5 * Ctrl |
| 10390072 OTTMUSG00000  | NM_001007584 | 0.00800979   | -1.2682  | E11.5 * Wnt1 down vs E11.5 * Ctrl |
| 10362245 Epb4.1l2      | NM_013511    | 8.4433e-006  | -1.26829 | E11.5 * Wnt1 down vs E11.5 * Ctrl |
| 10478678 Cd40          | NM_170701    | 0.000727172  | -1.26838 | E11.5 * Wnt1 down vs E11.5 * Ctrl |

|                        |               |              |          |                                   |
|------------------------|---------------|--------------|----------|-----------------------------------|
| 10511755 Wwp1          | NM_177327     | 0.00415301   | -1.26838 | E11.5 * Wnt1 down vs E11.5 * Ctrl |
| 10606436 Nsbp1         | NM_016710     | 0.00869119   | -1.26843 | E11.5 * Wnt1 down vs E11.5 * Ctrl |
| 10409986 4933434E20Rik | NM_025762     | 0.00131625   | -1.2686  | E11.5 * Wnt1 down vs E11.5 * Ctrl |
| 10474048 Syt13         | NM_030725     | 4.78772e-005 | -1.26893 | E11.5 * Wnt1 down vs E11.5 * Ctrl |
| 10575213 Zfhx3         | NM_007496     | 0.00549997   | -1.26899 | E11.5 * Wnt1 down vs E11.5 * Ctrl |
| 10349051 Tnfrsf11a     | NM_009399     | 0.00632974   | -1.26922 | E11.5 * Wnt1 down vs E11.5 * Ctrl |
| 10405216 Syk           | NM_011518     | 0.0025264    | -1.26928 | E11.5 * Wnt1 down vs E11.5 * Ctrl |
| 10438425 Olfr167       | NM_146935     | 0.000156401  | -1.26931 | E11.5 * Wnt1 down vs E11.5 * Ctrl |
| 10532248 Rnf212        | ENSMUST000001 | 0.00071587   | -1.26933 | E11.5 * Wnt1 down vs E11.5 * Ctrl |
| 10588007 Tfdp2         | NM_178667     | 3.09016e-006 | -1.26945 | E11.5 * Wnt1 down vs E11.5 * Ctrl |
| 10357932 Ppp1r12b      | NM_001081307  | 3.68073e-005 | -1.26951 | E11.5 * Wnt1 down vs E11.5 * Ctrl |
| 10352777 Slc30a1       | NM_009579     | 0.0020104    | -1.27031 | E11.5 * Wnt1 down vs E11.5 * Ctrl |
| 10457225 Map3k8        | NM_007746     | 0.00668934   | -1.27052 | E11.5 * Wnt1 down vs E11.5 * Ctrl |
| 10556426 Parva         | NM_020606     | 0.00676216   | -1.2706  | E11.5 * Wnt1 down vs E11.5 * Ctrl |
| 10481857 Pbx3          | NM_016768     | 0.000503388  | -1.27111 | E11.5 * Wnt1 down vs E11.5 * Ctrl |
| 10492091 Smad9         | NM_019483     | 0.00494317   | -1.2718  | E11.5 * Wnt1 down vs E11.5 * Ctrl |
| 10557229 LOC100134980  | BC016578      | 0.00206731   | -1.27185 | E11.5 * Wnt1 down vs E11.5 * Ctrl |
| 10428453 Csmd3         | NM_001081391  | 0.000588505  | -1.27196 | E11.5 * Wnt1 down vs E11.5 * Ctrl |
| 10462130 Fam122a       | NM_026520     | 0.00548514   | -1.27201 | E11.5 * Wnt1 down vs E11.5 * Ctrl |
| 10415806 Fam124a       | ENSMUST000001 | 0.00376219   | -1.27203 | E11.5 * Wnt1 down vs E11.5 * Ctrl |
| 10344707 Pcmt1         | NM_183028     | 0.000447924  | -1.2724  | E11.5 * Wnt1 down vs E11.5 * Ctrl |
| 10467175 A830019P07Rik | ENSMUST000001 | 0.00587831   | -1.27244 | E11.5 * Wnt1 down vs E11.5 * Ctrl |
| 10493816 S100a5        | NM_011312     | 0.000409128  | -1.27286 | E11.5 * Wnt1 down vs E11.5 * Ctrl |
| 10373073 D10Ertd610e   | NM_028027     | 0.000968655  | -1.27289 | E11.5 * Wnt1 down vs E11.5 * Ctrl |
| 10443007 EG240055      | NM_001081656  | 0.00279524   | -1.27318 | E11.5 * Wnt1 down vs E11.5 * Ctrl |
| 10502469 Pdlim5        | NM_019808     | 0.00177567   | -1.27321 | E11.5 * Wnt1 down vs E11.5 * Ctrl |
| 10402063 Foxn3         | BC029185      | 0.000197353  | -1.27355 | E11.5 * Wnt1 down vs E11.5 * Ctrl |
| 10603440 Was           | NM_009515     | 0.00199827   | -1.27363 | E11.5 * Wnt1 down vs E11.5 * Ctrl |
| 10435043 Tm4sf19       | BC147727      | 0.00710366   | -1.27379 | E11.5 * Wnt1 down vs E11.5 * Ctrl |
| 10445071 Zfp57         | NM_001013745  | 0.000418394  | -1.27408 | E11.5 * Wnt1 down vs E11.5 * Ctrl |
| 10367436 Cd63          | NM_001042580  | 0.00133217   | -1.27439 | E11.5 * Wnt1 down vs E11.5 * Ctrl |
| 10421581 Lrch1         | NM_001033439  | 0.00019307   | -1.27478 | E11.5 * Wnt1 down vs E11.5 * Ctrl |
| 10350102 Ptpn7         | NM_177081     | 0.00227416   | -1.27511 | E11.5 * Wnt1 down vs E11.5 * Ctrl |
| 10392683 ENSMUSG000001 | ENSMUST000001 | 0.00405625   | -1.27528 | E11.5 * Wnt1 down vs E11.5 * Ctrl |
| 10480891 Ubac1         | NM_133835     | 0.00226036   | -1.27541 | E11.5 * Wnt1 down vs E11.5 * Ctrl |
| 10506397 Mier1         | NM_027696     | 0.0035441    | -1.27548 | E11.5 * Wnt1 down vs E11.5 * Ctrl |
| 10425808 Tspo          | NM_009775     | 0.00427977   | -1.27679 | E11.5 * Wnt1 down vs E11.5 * Ctrl |
| 10411609               | ---           | 0.00533854   | -1.27691 | E11.5 * Wnt1 down vs E11.5 * Ctrl |
| 10528548 Kcnh2         | NM_013569     | 0.000751654  | -1.27702 | E11.5 * Wnt1 down vs E11.5 * Ctrl |
| 10454235 Asxl3         | ENSMUST000001 | 0.00122616   | -1.27706 | E11.5 * Wnt1 down vs E11.5 * Ctrl |
| 10379721 Ccl4          | NM_013652     | 0.000157441  | -1.27769 | E11.5 * Wnt1 down vs E11.5 * Ctrl |
| 10577395 6820431F20Rik | BC058969      | 0.000531531  | -1.27846 | E11.5 * Wnt1 down vs E11.5 * Ctrl |
| 10531370 Naaa          | NM_025972     | 0.00286972   | -1.27891 | E11.5 * Wnt1 down vs E11.5 * Ctrl |
| 10394833 2410018L13Rik | BC063063      | 0.00693156   | -1.27907 | E11.5 * Wnt1 down vs E11.5 * Ctrl |
| 10502071 5730508B09Rik | NM_027482     | 0.00584197   | -1.27952 | E11.5 * Wnt1 down vs E11.5 * Ctrl |
| 10606009 Gm614         | BC147523      | 0.00815799   | -1.27982 | E11.5 * Wnt1 down vs E11.5 * Ctrl |
| 10485070 Mdk           | NM_010784     | 0.00422095   | -1.27991 | E11.5 * Wnt1 down vs E11.5 * Ctrl |
| 10472042 OTTMUSG000001 | AF390105      | 0.00371754   | -1.27999 | E11.5 * Wnt1 down vs E11.5 * Ctrl |
| 10544436 Olfr458       | NM_146444     | 0.00624987   | -1.28004 | E11.5 * Wnt1 down vs E11.5 * Ctrl |
| 10469828 Psd4          | NM_177611     | 0.00620894   | -1.28008 | E11.5 * Wnt1 down vs E11.5 * Ctrl |
| 10531348 Ppef2         | NM_011148     | 1.24103e-005 | -1.28014 | E11.5 * Wnt1 down vs E11.5 * Ctrl |
| 10558645 Olfr533       | NM_001011815  | 0.00278469   | -1.2802  | E11.5 * Wnt1 down vs E11.5 * Ctrl |
| 10376144 Fnip1         | NM_173753     | 0.00172515   | -1.28087 | E11.5 * Wnt1 down vs E11.5 * Ctrl |
| 10405731 4933434E20Rik | NM_025762     | 0.000533324  | -1.28099 | E11.5 * Wnt1 down vs E11.5 * Ctrl |
| 10419167 Ptgdr         | NM_008962     | 0.00754992   | -1.28114 | E11.5 * Wnt1 down vs E11.5 * Ctrl |
| 10363379 Cbara1        | NM_144822     | 0.00193027   | -1.28124 | E11.5 * Wnt1 down vs E11.5 * Ctrl |
| 10603247               | ---           | 0.00629053   | -1.28141 | E11.5 * Wnt1 down vs E11.5 * Ctrl |
| 10433480 Rpl39l        | NM_026594     | 0.000282586  | -1.28143 | E11.5 * Wnt1 down vs E11.5 * Ctrl |
| 10363007 Ascc3         | NM_001146089  | 2.26627e-006 | -1.2821  | E11.5 * Wnt1 down vs E11.5 * Ctrl |
| 10503617 F730047E07Rik | NM_199467     | 0.00251236   | -1.28212 | E11.5 * Wnt1 down vs E11.5 * Ctrl |
| 10510230 OTTMUSG000001 | NM_001039209  | 0.00231006   | -1.28221 | E11.5 * Wnt1 down vs E11.5 * Ctrl |
| 10586306 Igdcc4        | NM_020043     | 0.00201629   | -1.28255 | E11.5 * Wnt1 down vs E11.5 * Ctrl |
| 10475866 Bcl2l11       | NM_207680     | 0.00167019   | -1.28271 | E11.5 * Wnt1 down vs E11.5 * Ctrl |
| 10529801 Fbxl5         | NM_178729     | 0.00252193   | -1.28274 | E11.5 * Wnt1 down vs E11.5 * Ctrl |
| 10456492 D18Ertd653e   | NM_172631     | 0.00851472   | -1.28321 | E11.5 * Wnt1 down vs E11.5 * Ctrl |
| 10378216 Atp2a3        | NM_016745     | 0.000453388  | -1.28336 | E11.5 * Wnt1 down vs E11.5 * Ctrl |

|                        |              |              |          |                                   |
|------------------------|--------------|--------------|----------|-----------------------------------|
| 10361234 Hsd11b1       | NM_008288    | 0.00185398   | -1.28341 | E11.5 * Wnt1 down vs E11.5 * Ctrl |
| 10440647 Cldn8         | NM_018778    | 0.00529012   | -1.2839  | E11.5 * Wnt1 down vs E11.5 * Ctrl |
| 10540408 Itpr1         | NM_010585    | 0.000752138  | -1.28408 | E11.5 * Wnt1 down vs E11.5 * Ctrl |
| 10432439 Fmnl3         | NM_011711    | 0.00441804   | -1.28411 | E11.5 * Wnt1 down vs E11.5 * Ctrl |
| 10408490 Exoc2         | NM_025588    | 9.24722e-006 | -1.28429 | E11.5 * Wnt1 down vs E11.5 * Ctrl |
| 10597945 Tmem158       | NM_001002267 | 0.00201415   | -1.2845  | E11.5 * Wnt1 down vs E11.5 * Ctrl |
| 10559238 Igf2as        | NR_002855    | 0.00115634   | -1.28482 | E11.5 * Wnt1 down vs E11.5 * Ctrl |
| 10346116               | ---          | 0.00719801   | -1.28494 | E11.5 * Wnt1 down vs E11.5 * Ctrl |
| 10461408 Rab3il1       | NM_144538    | 0.0011063    | -1.28495 | E11.5 * Wnt1 down vs E11.5 * Ctrl |
| 10496656 Col24a1       | NM_027770    | 0.00192489   | -1.28513 | E11.5 * Wnt1 down vs E11.5 * Ctrl |
| 10548367 Clec1a        | NM_175526    | 0.00181492   | -1.28523 | E11.5 * Wnt1 down vs E11.5 * Ctrl |
| 10385466 Sgcd          | NM_011891    | 0.00737797   | -1.28523 | E11.5 * Wnt1 down vs E11.5 * Ctrl |
| 10552208 Nudt19        | NM_033080    | 0.00267968   | -1.28527 | E11.5 * Wnt1 down vs E11.5 * Ctrl |
| 10548905 Eps8          | NM_007945    | 0.000687709  | -1.28541 | E11.5 * Wnt1 down vs E11.5 * Ctrl |
| 10471844 Nek6          | NM_021606    | 0.00743942   | -1.28579 | E11.5 * Wnt1 down vs E11.5 * Ctrl |
| 10512384 BC049635      | NM_177785    | 0.000608026  | -1.2859  | E11.5 * Wnt1 down vs E11.5 * Ctrl |
| 10552351               | ---          | 0.00820556   | -1.28615 | E11.5 * Wnt1 down vs E11.5 * Ctrl |
| 10511789 Nkain3        | NM_172987    | 0.00403848   | -1.28689 | E11.5 * Wnt1 down vs E11.5 * Ctrl |
| 10395287 Atxn711       | NM_028139    | 8.90833e-005 | -1.28705 | E11.5 * Wnt1 down vs E11.5 * Ctrl |
| 10590073 Vill          | NM_011700    | 0.00286025   | -1.28707 | E11.5 * Wnt1 down vs E11.5 * Ctrl |
| 10518335 OTTMUSG00000  | NM_001083918 | 0.00152806   | -1.28735 | E11.5 * Wnt1 down vs E11.5 * Ctrl |
| 10490491 Gata5         | NM_008093    | 0.000219286  | -1.28754 | E11.5 * Wnt1 down vs E11.5 * Ctrl |
| 10398224 Cyp46a1       | NM_010010    | 0.000774202  | -1.28757 | E11.5 * Wnt1 down vs E11.5 * Ctrl |
| 10459225               | ---          | 0.00668633   | -1.28779 | E11.5 * Wnt1 down vs E11.5 * Ctrl |
| 10568714 Mki67         | NM_001081117 | 0.000124744  | -1.2879  | E11.5 * Wnt1 down vs E11.5 * Ctrl |
| 10433639 Mki2          | NM_153588    | 2.49292e-005 | -1.28794 | E11.5 * Wnt1 down vs E11.5 * Ctrl |
| 10580191 Nfix          | NM_001081981 | 0.0017201    | -1.28851 | E11.5 * Wnt1 down vs E11.5 * Ctrl |
| 10414711               | ---          | 0.00608801   | -1.29012 | E11.5 * Wnt1 down vs E11.5 * Ctrl |
| 10554945 Prcp          | NM_028243    | 0.0048358    | -1.29015 | E11.5 * Wnt1 down vs E11.5 * Ctrl |
| 10433797 Prkdc         | NM_011159    | 0.00044219   | -1.29031 | E11.5 * Wnt1 down vs E11.5 * Ctrl |
| 10483246               | ---          | 0.0063469    | -1.29032 | E11.5 * Wnt1 down vs E11.5 * Ctrl |
| 10530827 Spink2        | NM_183284    | 0.00241622   | -1.29039 | E11.5 * Wnt1 down vs E11.5 * Ctrl |
| 10385774 Olfr1371      | NM_207253    | 0.0065562    | -1.29076 | E11.5 * Wnt1 down vs E11.5 * Ctrl |
| 10578025               | ---          | 0.00285665   | -1.2911  | E11.5 * Wnt1 down vs E11.5 * Ctrl |
| 10472449 4933409G03Rik | NM_177651    | 0.000693735  | -1.29168 | E11.5 * Wnt1 down vs E11.5 * Ctrl |
| 10367024 Tac2          | NM_009312    | 0.00281326   | -1.2918  | E11.5 * Wnt1 down vs E11.5 * Ctrl |
| 10461160               | ---          | 0.00137511   | -1.2928  | E11.5 * Wnt1 down vs E11.5 * Ctrl |
| 10344725 Adhfe1        | NM_175236    | 0.000303008  | -1.29292 | E11.5 * Wnt1 down vs E11.5 * Ctrl |
| 10412830 Ngly1         | NM_021504    | 0.0014878    | -1.29308 | E11.5 * Wnt1 down vs E11.5 * Ctrl |
| 10427095 Tenc1         | NM_153533    | 0.00163156   | -1.29398 | E11.5 * Wnt1 down vs E11.5 * Ctrl |
| 10550509 Pglyrp1       | NM_009402    | 0.00370851   | -1.29424 | E11.5 * Wnt1 down vs E11.5 * Ctrl |
| 10403748               | ---          | 0.000435611  | -1.29444 | E11.5 * Wnt1 down vs E11.5 * Ctrl |
| 10355514 Tns1          | NM_027884    | 0.00316253   | -1.29448 | E11.5 * Wnt1 down vs E11.5 * Ctrl |
| 10453629 9430020K01Rik | NM_001081963 | 0.00247161   | -1.29457 | E11.5 * Wnt1 down vs E11.5 * Ctrl |
| 10468253 Nt5c2         | NM_029810    | 0.00549884   | -1.29464 | E11.5 * Wnt1 down vs E11.5 * Ctrl |
| 10455098 Pcdhb14       | NM_053139    | 0.00114337   | -1.29468 | E11.5 * Wnt1 down vs E11.5 * Ctrl |
| 10574259 Gpr56         | NM_018882    | 0.000818831  | -1.29471 | E11.5 * Wnt1 down vs E11.5 * Ctrl |
| 10552140 Cebpa         | NM_007678    | 0.000905628  | -1.29478 | E11.5 * Wnt1 down vs E11.5 * Ctrl |
| 10385893 Slc22a4       | NM_019687    | 0.00172089   | -1.29486 | E11.5 * Wnt1 down vs E11.5 * Ctrl |
| 10602592 Hsd17b10      | NM_016763    | 0.000310167  | -1.29556 | E11.5 * Wnt1 down vs E11.5 * Ctrl |
| 10384622 Ehbp1         | NM_153078    | 0.00213728   | -1.29568 | E11.5 * Wnt1 down vs E11.5 * Ctrl |
| 10394555 Rdh14         | NM_023697    | 0.000312955  | -1.29578 | E11.5 * Wnt1 down vs E11.5 * Ctrl |
| 10352439 Susd4         | NM_144796    | 0.00205815   | -1.29616 | E11.5 * Wnt1 down vs E11.5 * Ctrl |
| 10532305 4930522L14Rik | BC065392     | 0.00504707   | -1.2964  | E11.5 * Wnt1 down vs E11.5 * Ctrl |
| 10367475               | ---          | 0.000682698  | -1.29642 | E11.5 * Wnt1 down vs E11.5 * Ctrl |
| 10412123 Ncf2          | NM_010877    | 0.00026577   | -1.29646 | E11.5 * Wnt1 down vs E11.5 * Ctrl |
| 10451093 Spats1        | NM_027649    | 0.00444222   | -1.29698 | E11.5 * Wnt1 down vs E11.5 * Ctrl |
| 10556413 Mical1        | AB359922     | 0.00238311   | -1.29711 | E11.5 * Wnt1 down vs E11.5 * Ctrl |
| 10405785 0610007P08Rik | NM_023507    | 0.00474654   | -1.29718 | E11.5 * Wnt1 down vs E11.5 * Ctrl |
| 10595840 Acpl2         | NM_153420    | 0.0061015    | -1.29753 | E11.5 * Wnt1 down vs E11.5 * Ctrl |
| 10585535 Isl2          | NM_027397    | 0.00150666   | -1.29771 | E11.5 * Wnt1 down vs E11.5 * Ctrl |
| 10417579 4930452B06Rik | BC064468     | 0.00817459   | -1.29804 | E11.5 * Wnt1 down vs E11.5 * Ctrl |
| 10416709 Tdrd3         | NM_172605    | 8.06423e-005 | -1.29824 | E11.5 * Wnt1 down vs E11.5 * Ctrl |
| 10476237 Hspa12b       | NM_028306    | 0.00390331   | -1.29885 | E11.5 * Wnt1 down vs E11.5 * Ctrl |
| 10519504 Sri           | NM_025618    | 0.00045181   | -1.2991  | E11.5 * Wnt1 down vs E11.5 * Ctrl |
| 10504127 Ccl21a        | NM_011124    | 0.00543837   | -1.29913 | E11.5 * Wnt1 down vs E11.5 * Ctrl |

|          |               |              |              |          |                                   |
|----------|---------------|--------------|--------------|----------|-----------------------------------|
| 10504154 | Ccl21a        | NM_011124    | 0.00543837   | -1.29913 | E11.5 * Wnt1 down vs E11.5 * Ctrl |
| 10504183 | Ccl21a        | NM_011124    | 0.00543837   | -1.29913 | E11.5 * Wnt1 down vs E11.5 * Ctrl |
| 10512377 | Ccl21a        | NM_011124    | 0.00543837   | -1.29913 | E11.5 * Wnt1 down vs E11.5 * Ctrl |
| 10356170 |               | ---          | 0.00720251   | -1.29942 | E11.5 * Wnt1 down vs E11.5 * Ctrl |
| 10512334 | 100038993     | NM_001100596 | 0.000136882  | -1.29952 | E11.5 * Wnt1 down vs E11.5 * Ctrl |
| 10512356 | 100038993     | NM_001100596 | 0.000136882  | -1.29952 | E11.5 * Wnt1 down vs E11.5 * Ctrl |
| 10601854 | Wbp5          | NM_011712    | 2.37809e-005 | -1.29976 | E11.5 * Wnt1 down vs E11.5 * Ctrl |
| 10432640 | Bin2          | ENSMUST00000 | 0.00328451   | -1.2999  | E11.5 * Wnt1 down vs E11.5 * Ctrl |
| 10483439 | Lrp2          | NM_001081088 | 0.000178219  | -1.29996 | E11.5 * Wnt1 down vs E11.5 * Ctrl |
| 10421924 | Pcdh9         | NM_001081377 | 0.00727971   | -1.30008 | E11.5 * Wnt1 down vs E11.5 * Ctrl |
| 10487645 | Cpxm1         | NM_019696    | 0.00470955   | -1.30064 | E11.5 * Wnt1 down vs E11.5 * Ctrl |
| 10394938 |               | ---          | 0.00561484   | -1.30079 | E11.5 * Wnt1 down vs E11.5 * Ctrl |
| 10399657 |               | ---          | 0.00561484   | -1.30079 | E11.5 * Wnt1 down vs E11.5 * Ctrl |
| 10500204 | Ecm1          | NM_007899    | 0.00310224   | -1.30121 | E11.5 * Wnt1 down vs E11.5 * Ctrl |
| 10415248 | Pck2          | NM_028994    | 0.000137083  | -1.30132 | E11.5 * Wnt1 down vs E11.5 * Ctrl |
| 10384782 | Vrk2          | NM_027260    | 0.00102755   | -1.30141 | E11.5 * Wnt1 down vs E11.5 * Ctrl |
| 10485117 | Creb3l1       | NM_011957    | 0.00130933   | -1.30156 | E11.5 * Wnt1 down vs E11.5 * Ctrl |
| 10459510 |               | ---          | 0.00152122   | -1.30199 | E11.5 * Wnt1 down vs E11.5 * Ctrl |
| 10362803 | Cd164         | NM_016898    | 0.00010007   | -1.30247 | E11.5 * Wnt1 down vs E11.5 * Ctrl |
| 10567995 | Nupr1         | NM_019738    | 0.00138658   | -1.30288 | E11.5 * Wnt1 down vs E11.5 * Ctrl |
| 10362432 | Trdn          | NM_029726    | 0.00528483   | -1.30313 | E11.5 * Wnt1 down vs E11.5 * Ctrl |
| 10564343 | Tjp1          | NM_009386    | 5.79567e-007 | -1.30314 | E11.5 * Wnt1 down vs E11.5 * Ctrl |
| 10477250 | Hck           | NM_010407    | 0.000252275  | -1.30357 | E11.5 * Wnt1 down vs E11.5 * Ctrl |
| 10413839 | Ncoa4         | NM_001033988 | 2.33924e-005 | -1.30369 | E11.5 * Wnt1 down vs E11.5 * Ctrl |
| 10598603 |               |              | 0.00107628   | -1.30401 | E11.5 * Wnt1 down vs E11.5 * Ctrl |
| 10394852 | EG668698      | ENSMUST00000 | 0.00183861   | -1.30426 | E11.5 * Wnt1 down vs E11.5 * Ctrl |
| 10344807 | Cspp1         | NM_026493    | 0.00145192   | -1.30457 | E11.5 * Wnt1 down vs E11.5 * Ctrl |
| 10405605 | Smad5         | NM_008541    | 3.90555e-005 | -1.30488 | E11.5 * Wnt1 down vs E11.5 * Ctrl |
| 10468746 | Hspa12a       | NM_175199    | 0.00279993   | -1.30535 | E11.5 * Wnt1 down vs E11.5 * Ctrl |
| 10504169 | 4933409K07Rik | BC072647     | 0.0013073    | -1.30558 | E11.5 * Wnt1 down vs E11.5 * Ctrl |
| 10595560 | Tbx18         | NM_023814    | 0.000140706  | -1.30578 | E11.5 * Wnt1 down vs E11.5 * Ctrl |
| 10579347 | Ifi30         | NM_023065    | 0.00457455   | -1.30605 | E11.5 * Wnt1 down vs E11.5 * Ctrl |
| 10504905 | E130309F12Rik | NM_178756    | 0.00512052   | -1.30622 | E11.5 * Wnt1 down vs E11.5 * Ctrl |
| 10593449 | Layn          | NM_001033534 | 0.00715789   | -1.30632 | E11.5 * Wnt1 down vs E11.5 * Ctrl |
| 10359377 | Zbtb37        | NM_173424    | 9.19255e-005 | -1.30635 | E11.5 * Wnt1 down vs E11.5 * Ctrl |
| 10585803 | Stra6         | NM_009291    | 0.00861366   | -1.30639 | E11.5 * Wnt1 down vs E11.5 * Ctrl |
| 10487238 | Hdc           | NM_008230    | 0.000612348  | -1.30697 | E11.5 * Wnt1 down vs E11.5 * Ctrl |
| 10605392 | F8            | NM_007977    | 0.00784364   | -1.30713 | E11.5 * Wnt1 down vs E11.5 * Ctrl |
| 10588942 | Lamb2         | NM_008483    | 0.00182962   | -1.30722 | E11.5 * Wnt1 down vs E11.5 * Ctrl |
| 10366983 | Tmem194       | NM_001113211 | 0.00403322   | -1.30739 | E11.5 * Wnt1 down vs E11.5 * Ctrl |
| 10596166 | 1300017J02Rik | BC021390     | 9.68465e-005 | -1.30796 | E11.5 * Wnt1 down vs E11.5 * Ctrl |
| 10500011 | Tuft1         | NM_011656    | 0.00339408   | -1.30837 | E11.5 * Wnt1 down vs E11.5 * Ctrl |
| 10524331 | C130026L21Rik | ENSMUST00000 | 0.00377298   | -1.3091  | E11.5 * Wnt1 down vs E11.5 * Ctrl |
| 10607183 | Lhfp1         | NM_178358    | 0.00431677   | -1.3093  | E11.5 * Wnt1 down vs E11.5 * Ctrl |
| 10413943 | Lrrc18        | NM_026253    | 9.54018e-005 | -1.30932 | E11.5 * Wnt1 down vs E11.5 * Ctrl |
| 10447513 | ENSMUSG0000C  | ENSMUST00000 | 0.00286607   | -1.30971 | E11.5 * Wnt1 down vs E11.5 * Ctrl |
| 10395293 | Atxn7l1       | NM_001033436 | 0.00100094   | -1.30994 | E11.5 * Wnt1 down vs E11.5 * Ctrl |
| 10551872 | Al428936      | NM_153577    | 0.00662241   | -1.30994 | E11.5 * Wnt1 down vs E11.5 * Ctrl |
| 10586491 | Dapk2         | NM_010019    | 0.000655767  | -1.31003 | E11.5 * Wnt1 down vs E11.5 * Ctrl |
| 10458090 | Reep5         | NM_007874    | 0.00209281   | -1.31031 | E11.5 * Wnt1 down vs E11.5 * Ctrl |
| 10537880 |               | ---          | 0.0062942    | -1.31032 | E11.5 * Wnt1 down vs E11.5 * Ctrl |
| 10400057 | Arl4a         | NM_001039515 | 0.000220513  | -1.31058 | E11.5 * Wnt1 down vs E11.5 * Ctrl |
| 10447130 | Pkdcc         | NM_134117    | 0.00107578   | -1.31073 | E11.5 * Wnt1 down vs E11.5 * Ctrl |
| 10557009 | Eef2k         | NM_007908    | 5.82175e-005 | -1.31075 | E11.5 * Wnt1 down vs E11.5 * Ctrl |
| 10388545 | Abr           | NM_198895    | 0.00195233   | -1.31081 | E11.5 * Wnt1 down vs E11.5 * Ctrl |
| 10359446 | Al848100      | BC138379     | 0.00178666   | -1.31086 | E11.5 * Wnt1 down vs E11.5 * Ctrl |
| 10374236 | Upp1          | NM_009477    | 0.00618538   | -1.31092 | E11.5 * Wnt1 down vs E11.5 * Ctrl |
| 10506786 | Zcchc11       | NM_175472    | 0.000590564  | -1.31093 | E11.5 * Wnt1 down vs E11.5 * Ctrl |
| 10500982 | I830077J02Rik | NM_001033780 | 0.00714922   | -1.31108 | E11.5 * Wnt1 down vs E11.5 * Ctrl |
| 10418048 | ENSMUSG0000C  | ENSMUST00000 | 0.00352789   | -1.31131 | E11.5 * Wnt1 down vs E11.5 * Ctrl |
| 10587829 | Plod2         | NM_001142916 | 0.000223567  | -1.31148 | E11.5 * Wnt1 down vs E11.5 * Ctrl |
| 10607124 | Chrdl1        | NM_001114385 | 0.00586423   | -1.31155 | E11.5 * Wnt1 down vs E11.5 * Ctrl |
| 10513608 | Alad          | NM_008525    | 0.00146505   | -1.31188 | E11.5 * Wnt1 down vs E11.5 * Ctrl |
| 10354368 | Col5a2        | BC055077     | 0.00179341   | -1.31231 | E11.5 * Wnt1 down vs E11.5 * Ctrl |
| 10596747 | Sema3f        | NM_011349    | 0.000132135  | -1.31257 | E11.5 * Wnt1 down vs E11.5 * Ctrl |
| 10569437 | Phlda2        | NM_009434    | 0.00011389   | -1.31273 | E11.5 * Wnt1 down vs E11.5 * Ctrl |

|          |               |               |              |          |                                   |
|----------|---------------|---------------|--------------|----------|-----------------------------------|
| 10595718 | Chst2         | NM_018763     | 0.00383349   | -1.31323 | E11.5 * Wnt1 down vs E11.5 * Ctrl |
| 10399198 | Ncoa4         | NM_019744     | 5.65788e-005 | -1.31337 | E11.5 * Wnt1 down vs E11.5 * Ctrl |
| 10566926 | Rnf141        | NM_025999     | 0.0070669    | -1.3139  | E11.5 * Wnt1 down vs E11.5 * Ctrl |
| 10481186 | Sardh         | NM_138665     | 0.000788129  | -1.31397 | E11.5 * Wnt1 down vs E11.5 * Ctrl |
| 10438907 | Gp5           | NM_008148     | 0.00442571   | -1.31435 | E11.5 * Wnt1 down vs E11.5 * Ctrl |
| 10516335 | Tekt2         | NM_011902     | 0.00692923   | -1.31483 | E11.5 * Wnt1 down vs E11.5 * Ctrl |
| 10518300 | Tnfrsf1b      | NM_011610     | 0.00495958   | -1.31512 | E11.5 * Wnt1 down vs E11.5 * Ctrl |
| 10566264 | EG436003      | NM_001127686  | 0.000705699  | -1.3159  | E11.5 * Wnt1 down vs E11.5 * Ctrl |
| 10559172 | Krtap5-3      | ENSMUST000000 | 0.00783117   | -1.31596 | E11.5 * Wnt1 down vs E11.5 * Ctrl |
| 10394805 | 5730507C01Rik | ENSMUST000000 | 0.00130795   | -1.31623 | E11.5 * Wnt1 down vs E11.5 * Ctrl |
| 10410099 | Cdc14b        | NM_172587     | 0.00161611   | -1.3163  | E11.5 * Wnt1 down vs E11.5 * Ctrl |
| 10367434 | ENSMUSG00000C | AK086046      | 0.00600649   | -1.3164  | E11.5 * Wnt1 down vs E11.5 * Ctrl |
| 10408185 | Btn2a2        | NM_175938     | 0.000258837  | -1.31671 | E11.5 * Wnt1 down vs E11.5 * Ctrl |
| 10404152 | Fam65b        | NM_029679     | 0.007576     | -1.31685 | E11.5 * Wnt1 down vs E11.5 * Ctrl |
| 10522712 | Rest          | NM_011263     | 0.0018142    | -1.31686 | E11.5 * Wnt1 down vs E11.5 * Ctrl |
| 10353460 | Kcnq5         | NM_023872     | 0.00213059   | -1.31714 | E11.5 * Wnt1 down vs E11.5 * Ctrl |
| 10592535 | Sorl1         | NM_011436     | 8.06031e-005 | -1.31723 | E11.5 * Wnt1 down vs E11.5 * Ctrl |
| 10600355 | Snora70       | NR_002899     | 0.000530807  | -1.31731 | E11.5 * Wnt1 down vs E11.5 * Ctrl |
| 10602756 | Smpx          | NM_025357     | 0.00328549   | -1.31752 | E11.5 * Wnt1 down vs E11.5 * Ctrl |
| 10544982 | Nt5c3         | NM_026004     | 0.00364824   | -1.31763 | E11.5 * Wnt1 down vs E11.5 * Ctrl |
| 10512067 | Ddx58         | NM_172689     | 0.000176105  | -1.3178  | E11.5 * Wnt1 down vs E11.5 * Ctrl |
| 10510178 | OTTMUSG00000C | NM_001037926  | 0.000687979  | -1.31802 | E11.5 * Wnt1 down vs E11.5 * Ctrl |
| 10434285 | ---           | ---           | 0.00189368   | -1.31805 | E11.5 * Wnt1 down vs E11.5 * Ctrl |
| 10544348 | Trpv6         | NM_022413     | 7.58029e-005 | -1.31824 | E11.5 * Wnt1 down vs E11.5 * Ctrl |
| 10606864 | Tceal5        | NM_177919     | 0.00135941   | -1.31834 | E11.5 * Wnt1 down vs E11.5 * Ctrl |
| 10415608 | Ift88         | NM_009376     | 0.00818594   | -1.31836 | E11.5 * Wnt1 down vs E11.5 * Ctrl |
| 10411804 | Mast4         | ENSMUST000000 | 4.34033e-005 | -1.31848 | E11.5 * Wnt1 down vs E11.5 * Ctrl |
| 10517967 | Fblim1        | NM_133754     | 0.00706424   | -1.31919 | E11.5 * Wnt1 down vs E11.5 * Ctrl |
| 10387797 | Bcl6b         | NM_007528     | 0.00648509   | -1.31984 | E11.5 * Wnt1 down vs E11.5 * Ctrl |
| 10384233 | Tns3          | NM_001083587  | 0.0019797    | -1.32003 | E11.5 * Wnt1 down vs E11.5 * Ctrl |
| 10411464 | Fcho2         | NM_172591     | 0.000821941  | -1.32032 | E11.5 * Wnt1 down vs E11.5 * Ctrl |
| 10446771 | Lclat1        | NM_001081071  | 8.0172e-005  | -1.32033 | E11.5 * Wnt1 down vs E11.5 * Ctrl |
| 10592772 | Abcg4         | NM_138955     | 9.44037e-005 | -1.32069 | E11.5 * Wnt1 down vs E11.5 * Ctrl |
| 10504849 | Stx17         | NM_026343     | 0.00491725   | -1.32073 | E11.5 * Wnt1 down vs E11.5 * Ctrl |
| 10552245 | Tshz3         | NM_172298     | 0.000452725  | -1.32084 | E11.5 * Wnt1 down vs E11.5 * Ctrl |
| 10607189 | Amot          | NM_153319     | 0.00782983   | -1.32086 | E11.5 * Wnt1 down vs E11.5 * Ctrl |
| 10600921 | Stard8        | NM_199018     | 0.000247333  | -1.32094 | E11.5 * Wnt1 down vs E11.5 * Ctrl |
| 10591094 | Fat3          | NM_001080814  | 0.00202137   | -1.32105 | E11.5 * Wnt1 down vs E11.5 * Ctrl |
| 10466745 | Tjp2          | NM_011597     | 0.00121724   | -1.32131 | E11.5 * Wnt1 down vs E11.5 * Ctrl |
| 10594969 | Unc13c        | NM_001081153  | 0.000105183  | -1.32175 | E11.5 * Wnt1 down vs E11.5 * Ctrl |
| 10413932 | E130203B14Rik | NM_178791     | 0.00459949   | -1.32182 | E11.5 * Wnt1 down vs E11.5 * Ctrl |
| 10544660 | Osbpl3        | NM_027881     | 0.00015043   | -1.32187 | E11.5 * Wnt1 down vs E11.5 * Ctrl |
| 10526098 | Scand3        | NM_183088     | 0.00345008   | -1.322   | E11.5 * Wnt1 down vs E11.5 * Ctrl |
| 10492424 | ---           | ---           | 0.00435608   | -1.32203 | E11.5 * Wnt1 down vs E11.5 * Ctrl |
| 10414590 | Ear6          | NM_053111     | 0.00509398   | -1.32218 | E11.5 * Wnt1 down vs E11.5 * Ctrl |
| 10445119 | H2-M3         | NM_013819     | 0.00383209   | -1.3225  | E11.5 * Wnt1 down vs E11.5 * Ctrl |
| 10511446 | Asph          | NM_023066     | 8.96951e-005 | -1.32266 | E11.5 * Wnt1 down vs E11.5 * Ctrl |
| 10586433 | Rbpms2        | NM_028030     | 0.00405912   | -1.32294 | E11.5 * Wnt1 down vs E11.5 * Ctrl |
| 10479979 | Slc25a36      | NM_138756     | 0.0013048    | -1.32323 | E11.5 * Wnt1 down vs E11.5 * Ctrl |
| 10504178 | 4933409K07Rik | BC059060      | 0.000446607  | -1.32337 | E11.5 * Wnt1 down vs E11.5 * Ctrl |
| 10578253 | Sgcx          | NM_145841     | 0.0022436    | -1.32353 | E11.5 * Wnt1 down vs E11.5 * Ctrl |
| 10483809 | Nfe2l2        | NM_010902     | 0.00650283   | -1.3239  | E11.5 * Wnt1 down vs E11.5 * Ctrl |
| 10415413 | BC030046      | BC151043      | 0.00488978   | -1.32421 | E11.5 * Wnt1 down vs E11.5 * Ctrl |
| 10458569 | Nr3c1         | NM_008173     | 0.00305867   | -1.32462 | E11.5 * Wnt1 down vs E11.5 * Ctrl |
| 10601771 | Armex1        | NM_030066     | 0.000655837  | -1.32498 | E11.5 * Wnt1 down vs E11.5 * Ctrl |
| 10349102 | Bcl2          | NM_009741     | 0.00145847   | -1.32515 | E11.5 * Wnt1 down vs E11.5 * Ctrl |
| 10504172 | 4933409K07Rik | BC059060      | 0.000580578  | -1.32572 | E11.5 * Wnt1 down vs E11.5 * Ctrl |
| 10504188 | Ccl19         | NM_011888     | 0.00283484   | -1.32585 | E11.5 * Wnt1 down vs E11.5 * Ctrl |
| 10404783 | Edn1          | NM_010104     | 0.00376788   | -1.32588 | E11.5 * Wnt1 down vs E11.5 * Ctrl |
| 10465224 | ENSMUSG00000C | ENSMUST000000 | 0.00332634   | -1.32622 | E11.5 * Wnt1 down vs E11.5 * Ctrl |
| 10582303 | Cyba          | NM_007806     | 0.0064265    | -1.327   | E11.5 * Wnt1 down vs E11.5 * Ctrl |
| 10428604 | Tnfrsf11b     | NM_008764     | 0.00158052   | -1.32706 | E11.5 * Wnt1 down vs E11.5 * Ctrl |
| 10566583 | EG668139      | AK172683      | 0.00540248   | -1.32729 | E11.5 * Wnt1 down vs E11.5 * Ctrl |
| 10463277 | Nkx2-3        | NM_008699     | 0.00121055   | -1.32743 | E11.5 * Wnt1 down vs E11.5 * Ctrl |
| 10505120 | Palm2         | NM_172868     | 0.00223137   | -1.32764 | E11.5 * Wnt1 down vs E11.5 * Ctrl |
| 10446473 | Lama1         | NM_008480     | 0.000120144  | -1.32765 | E11.5 * Wnt1 down vs E11.5 * Ctrl |

|                        |               |              |          |                                   |
|------------------------|---------------|--------------|----------|-----------------------------------|
| 10420362 Gjb2          | NM_008125     | 0.00248483   | -1.32768 | E11.5 * Wnt1 down vs E11.5 * Ctrl |
| 10404429 Serpinb9      | NM_009256     | 0.00676726   | -1.32784 | E11.5 * Wnt1 down vs E11.5 * Ctrl |
| 10531338               | ---           | 0.00206397   | -1.32797 | E11.5 * Wnt1 down vs E11.5 * Ctrl |
| 10398240 Eml1          | NM_001043335  | 0.00105208   | -1.32805 | E11.5 * Wnt1 down vs E11.5 * Ctrl |
| 10461402 Fth1          | NM_010239     | 2.99447e-009 | -1.32828 | E11.5 * Wnt1 down vs E11.5 * Ctrl |
| 10348739 Sned1         | NM_172463     | 0.0029024    | -1.32835 | E11.5 * Wnt1 down vs E11.5 * Ctrl |
| 10557326 Il4ra         | NM_001008700  | 0.00523995   | -1.32844 | E11.5 * Wnt1 down vs E11.5 * Ctrl |
| 10500938 Wnt2b         | NM_009520     | 0.00610163   | -1.32856 | E11.5 * Wnt1 down vs E11.5 * Ctrl |
| 10572861 F2rl3         | NM_007975     | 0.00208693   | -1.3287  | E11.5 * Wnt1 down vs E11.5 * Ctrl |
| 10595702 1190002N15Rik | NM_001033145  | 0.0022677    | -1.32904 | E11.5 * Wnt1 down vs E11.5 * Ctrl |
| 10424439 Efr3a         | NM_133766     | 0.00196477   | -1.32911 | E11.5 * Wnt1 down vs E11.5 * Ctrl |
| 10384154 Myo1g         | NM_178440     | 0.000647039  | -1.32923 | E11.5 * Wnt1 down vs E11.5 * Ctrl |
| 10494351 Mtmr11        | NM_181409     | 0.00259642   | -1.32954 | E11.5 * Wnt1 down vs E11.5 * Ctrl |
| 10483178 Cobll1        | NM_177025     | 0.0014793    | -1.32958 | E11.5 * Wnt1 down vs E11.5 * Ctrl |
| 10561702 Kcnk6         | NM_001033525  | 0.000184257  | -1.32991 | E11.5 * Wnt1 down vs E11.5 * Ctrl |
| 10503148               | ---           | 0.00321386   | -1.33017 | E11.5 * Wnt1 down vs E11.5 * Ctrl |
| 10544417 Epha1         | NM_023580     | 0.00336875   | -1.33044 | E11.5 * Wnt1 down vs E11.5 * Ctrl |
| 10506225 Cachd1        | NM_198037     | 0.0053376    | -1.33062 | E11.5 * Wnt1 down vs E11.5 * Ctrl |
| 10360185               | ---           | 0.00443957   | -1.33153 | E11.5 * Wnt1 down vs E11.5 * Ctrl |
| 10548752               | ---           | 0.00828578   | -1.33172 | E11.5 * Wnt1 down vs E11.5 * Ctrl |
| 10568361 Yipf5         | NM_023311     | 0.00214743   | -1.33253 | E11.5 * Wnt1 down vs E11.5 * Ctrl |
| 10504148 4933409K07Rik | BC059060      | 0.000819599  | -1.33259 | E11.5 * Wnt1 down vs E11.5 * Ctrl |
| 10601874 Tceal3        | NM_001029978  | 0.00112478   | -1.33297 | E11.5 * Wnt1 down vs E11.5 * Ctrl |
| 10531529 Cnot6l        | NM_178854     | 9.68297e-005 | -1.33319 | E11.5 * Wnt1 down vs E11.5 * Ctrl |
| 10528799 Speer4a       | NM_029376     | 0.00794274   | -1.33339 | E11.5 * Wnt1 down vs E11.5 * Ctrl |
| 10360563 Smyd3         | NM_027188     | 0.00504264   | -1.33341 | E11.5 * Wnt1 down vs E11.5 * Ctrl |
| 10461979 Aldh1a1       | NM_013467     | 0.00169135   | -1.33369 | E11.5 * Wnt1 down vs E11.5 * Ctrl |
| 10541910 Vwf           | NM_011708     | 0.000302929  | -1.33369 | E11.5 * Wnt1 down vs E11.5 * Ctrl |
| 10512327 4933409K07Rik | BC072647      | 0.00091858   | -1.33374 | E11.5 * Wnt1 down vs E11.5 * Ctrl |
| 10347748 Acsl3         | NM_028817     | 0.00018138   | -1.33403 | E11.5 * Wnt1 down vs E11.5 * Ctrl |
| 10353844 Neurl3        | NM_153408     | 0.000433479  | -1.33427 | E11.5 * Wnt1 down vs E11.5 * Ctrl |
| 10447923 Tcte2         | NM_022311     | 4.7102e-005  | -1.33468 | E11.5 * Wnt1 down vs E11.5 * Ctrl |
| 10541885 Scnn1a        | NM_011324     | 0.0014867    | -1.33469 | E11.5 * Wnt1 down vs E11.5 * Ctrl |
| 10407416 Calml3        | NM_027416     | 0.00712498   | -1.33478 | E11.5 * Wnt1 down vs E11.5 * Ctrl |
| 10496862               | ---           | 0.000707417  | -1.33494 | E11.5 * Wnt1 down vs E11.5 * Ctrl |
| 10409202               | ---           | 0.000297603  | -1.33501 | E11.5 * Wnt1 down vs E11.5 * Ctrl |
| 10421418 Epb4.9        | NM_013514     | 8.49272e-005 | -1.33515 | E11.5 * Wnt1 down vs E11.5 * Ctrl |
| 10523260 Shroom3       | NM_015756     | 0.000278049  | -1.33577 | E11.5 * Wnt1 down vs E11.5 * Ctrl |
| 10438749               | ---           | 0.00460681   | -1.33666 | E11.5 * Wnt1 down vs E11.5 * Ctrl |
| 10355967 Ap1s3         | NM_183027     | 0.00249206   | -1.33699 | E11.5 * Wnt1 down vs E11.5 * Ctrl |
| 10405755               | ---           | 0.00086023   | -1.33714 | E11.5 * Wnt1 down vs E11.5 * Ctrl |
| 10413434 D14Abb1e      | NM_001114879  | 0.00062607   | -1.33752 | E11.5 * Wnt1 down vs E11.5 * Ctrl |
| 10392142 Cd79b         | NM_008339     | 0.00731131   | -1.33769 | E11.5 * Wnt1 down vs E11.5 * Ctrl |
| 10494889 Dennd2c       | NM_177857     | 0.000606592  | -1.33778 | E11.5 * Wnt1 down vs E11.5 * Ctrl |
| 10493086 Hdgf          | NM_008231     | 0.00114175   | -1.33836 | E11.5 * Wnt1 down vs E11.5 * Ctrl |
| 10504159 Ccl19         | NM_011888     | 0.00419383   | -1.33892 | E11.5 * Wnt1 down vs E11.5 * Ctrl |
| 10512322 Ccl19         | NM_011888     | 0.00419383   | -1.33892 | E11.5 * Wnt1 down vs E11.5 * Ctrl |
| 10500754 Sycp1         | NM_011516     | 0.000119107  | -1.33903 | E11.5 * Wnt1 down vs E11.5 * Ctrl |
| 10503615               | ---           | 0.000438261  | -1.33913 | E11.5 * Wnt1 down vs E11.5 * Ctrl |
| 10591660 Epor          | NM_010149     | 4.5189e-006  | -1.33917 | E11.5 * Wnt1 down vs E11.5 * Ctrl |
| 10400170 Prkd1         | NM_008858     | 0.00230343   | -1.3392  | E11.5 * Wnt1 down vs E11.5 * Ctrl |
| 10512930 Ppp3r2        | NM_001004025  | 0.00570378   | -1.3392  | E11.5 * Wnt1 down vs E11.5 * Ctrl |
| 10364072 Ggt5          | NM_011820     | 2.76718e-005 | -1.33932 | E11.5 * Wnt1 down vs E11.5 * Ctrl |
| 10374325 EG432534      | ENSMUST000001 | 0.0057847    | -1.34031 | E11.5 * Wnt1 down vs E11.5 * Ctrl |
| 10495449 Col11a1       | NM_007729     | 4.88483e-006 | -1.34046 | E11.5 * Wnt1 down vs E11.5 * Ctrl |
| 10519879 Speer4f       | NM_027609     | 0.000432048  | -1.34135 | E11.5 * Wnt1 down vs E11.5 * Ctrl |
| 10383214 Rnf213        | AK173199      | 0.000238995  | -1.34142 | E11.5 * Wnt1 down vs E11.5 * Ctrl |
| 10504775 Col15a1       | NM_009928     | 0.00027957   | -1.34157 | E11.5 * Wnt1 down vs E11.5 * Ctrl |
| 10602722 Spin2         | NM_001005370  | 0.00326915   | -1.34187 | E11.5 * Wnt1 down vs E11.5 * Ctrl |
| 10474381 Kif18a        | NM_139303     | 0.00125967   | -1.34215 | E11.5 * Wnt1 down vs E11.5 * Ctrl |
| 10596428 1110001D15Rik | NM_026763     | 0.00458064   | -1.34239 | E11.5 * Wnt1 down vs E11.5 * Ctrl |
| 10490384 Lama5         | NM_001081171  | 8.65876e-005 | -1.34247 | E11.5 * Wnt1 down vs E11.5 * Ctrl |
| 10485213 Cd82          | NM_007656     | 0.00131794   | -1.34291 | E11.5 * Wnt1 down vs E11.5 * Ctrl |
| 10489204 Tgm2          | NM_009373     | 0.000577551  | -1.34309 | E11.5 * Wnt1 down vs E11.5 * Ctrl |
| 10592289 Ccdc15        | NM_001081429  | 0.0012089    | -1.34328 | E11.5 * Wnt1 down vs E11.5 * Ctrl |
| 10549276 Bhlhe41       | NM_024469     | 7.72928e-005 | -1.34391 | E11.5 * Wnt1 down vs E11.5 * Ctrl |

|          |               |              |              |          |                                   |
|----------|---------------|--------------|--------------|----------|-----------------------------------|
| 10585331 | Exph5         | NM_176846    | 0.00097366   | -1.34441 | E11.5 * Wnt1 down vs E11.5 * Ctrl |
| 10413416 | Il17rd        | NM_134437    | 0.00146726   | -1.34536 | E11.5 * Wnt1 down vs E11.5 * Ctrl |
| 10488090 | Tasp1         | NM_175225    | 0.000247892  | -1.34552 | E11.5 * Wnt1 down vs E11.5 * Ctrl |
| 10528679 | Wdr86         | NM_001081441 | 0.000681468  | -1.3456  | E11.5 * Wnt1 down vs E11.5 * Ctrl |
| 10461078 | Ati3          | NM_146091    | 0.000180831  | -1.34615 | E11.5 * Wnt1 down vs E11.5 * Ctrl |
| 10391404 | D830013H23Rik | AK052868     | 0.00761294   | -1.34624 | E11.5 * Wnt1 down vs E11.5 * Ctrl |
| 10492310 | Mbnl1         | NM_020007    | 1.05692e-005 | -1.34642 | E11.5 * Wnt1 down vs E11.5 * Ctrl |
| 10511588 | Tmem67        | NM_177861    | 0.00292857   | -1.34651 | E11.5 * Wnt1 down vs E11.5 * Ctrl |
| 10352936 | Sox17         | NM_011441    | 0.00140201   | -1.34661 | E11.5 * Wnt1 down vs E11.5 * Ctrl |
| 10569485 | Tnfrsf26      | NM_175649    | 0.00468567   | -1.34681 | E11.5 * Wnt1 down vs E11.5 * Ctrl |
| 10590690 | Dync2h1       | NM_029851    | 8.56372e-006 | -1.34715 | E11.5 * Wnt1 down vs E11.5 * Ctrl |
| 10500570 | Hao3          | NM_019545    | 0.000315298  | -1.3474  | E11.5 * Wnt1 down vs E11.5 * Ctrl |
| 10557960 | Tgfb1i1       | NM_009365    | 0.001779     | -1.34839 | E11.5 * Wnt1 down vs E11.5 * Ctrl |
| 10552500 | Klk8          | NM_008940    | 0.000953749  | -1.34845 | E11.5 * Wnt1 down vs E11.5 * Ctrl |
| 10375578 | Flt4          | NM_008029    | 0.00116801   | -1.34909 | E11.5 * Wnt1 down vs E11.5 * Ctrl |
| 10474619 | Fmn1          | NM_010230    | 0.00491283   | -1.34915 | E11.5 * Wnt1 down vs E11.5 * Ctrl |
| 10579012 | Csgalnact1    | NM_172753    | 0.00857466   | -1.34945 | E11.5 * Wnt1 down vs E11.5 * Ctrl |
| 10533034 | Ccdc60        | NM_177759    | 0.00275969   | -1.34988 | E11.5 * Wnt1 down vs E11.5 * Ctrl |
| 10512372 | Ccl19         | NM_011888    | 0.00223483   | -1.35016 | E11.5 * Wnt1 down vs E11.5 * Ctrl |
| 10530393 | Gabrg1        | NM_010252    | 0.000814574  | -1.35028 | E11.5 * Wnt1 down vs E11.5 * Ctrl |
| 10578322 | Pdgfrl        | NM_026840    | 0.00873024   | -1.35043 | E11.5 * Wnt1 down vs E11.5 * Ctrl |
| 10503484 | Fam82b        | NM_025476    | 0.00608699   | -1.35053 | E11.5 * Wnt1 down vs E11.5 * Ctrl |
| 10537558 | 621968        | ENSMUST00000 | 0.00545877   | -1.35055 | E11.5 * Wnt1 down vs E11.5 * Ctrl |
| 10596465 | Acy1          | NM_025371    | 1.67942e-005 | -1.35117 | E11.5 * Wnt1 down vs E11.5 * Ctrl |
| 10474860 | Chst14        | NM_028117    | 0.000153524  | -1.35143 | E11.5 * Wnt1 down vs E11.5 * Ctrl |
| 10410235 | ---           | ---          | 0.00567808   | -1.35155 | E11.5 * Wnt1 down vs E11.5 * Ctrl |
| 10572897 | Hmx1          | NM_010442    | 0.00131406   | -1.35206 | E11.5 * Wnt1 down vs E11.5 * Ctrl |
| 10591161 | Zfp558        | ENSMUST00000 | 0.00774315   | -1.35218 | E11.5 * Wnt1 down vs E11.5 * Ctrl |
| 10373325 | Gpr182        | NM_007412    | 0.000308811  | -1.35232 | E11.5 * Wnt1 down vs E11.5 * Ctrl |
| 10427622 | ---           | ---          | 0.00704916   | -1.35306 | E11.5 * Wnt1 down vs E11.5 * Ctrl |
| 10490872 | Lrrcc1        | NM_028915    | 0.00176413   | -1.35326 | E11.5 * Wnt1 down vs E11.5 * Ctrl |
| 10504139 | 4933409K07Rik | BC059060     | 0.000513106  | -1.35342 | E11.5 * Wnt1 down vs E11.5 * Ctrl |
| 10363786 | Ank3          | NM_146005    | 0.00108982   | -1.35356 | E11.5 * Wnt1 down vs E11.5 * Ctrl |
| 10360848 | Mosc2         | NM_133684    | 2.89467e-006 | -1.35438 | E11.5 * Wnt1 down vs E11.5 * Ctrl |
| 10506254 | Raver2        | NM_183024    | 0.000636734  | -1.35455 | E11.5 * Wnt1 down vs E11.5 * Ctrl |
| 10467578 | Pik3ap1       | NM_031376    | 0.00011702   | -1.35551 | E11.5 * Wnt1 down vs E11.5 * Ctrl |
| 10523021 | Slc4a4        | NM_018760    | 0.00143039   | -1.35563 | E11.5 * Wnt1 down vs E11.5 * Ctrl |
| 10513592 | Wdr31         | NM_023597    | 0.00135209   | -1.35597 | E11.5 * Wnt1 down vs E11.5 * Ctrl |
| 10474371 | ENSMUSG00000  | ENSMUST00000 | 0.00193932   | -1.3561  | E11.5 * Wnt1 down vs E11.5 * Ctrl |
| 10427845 | F830212C03Rik | AK157350     | 0.00323356   | -1.35682 | E11.5 * Wnt1 down vs E11.5 * Ctrl |
| 10410475 | BC018507      | ENSMUST00000 | 5.67757e-005 | -1.35708 | E11.5 * Wnt1 down vs E11.5 * Ctrl |
| 10454398 | AW554918      | NM_001033532 | 0.00258319   | -1.35716 | E11.5 * Wnt1 down vs E11.5 * Ctrl |
| 10380260 | Trim25        | NM_009546    | 0.00211043   | -1.35777 | E11.5 * Wnt1 down vs E11.5 * Ctrl |
| 10469514 | Bmi1          | NM_007552    | 0.00337366   | -1.35777 | E11.5 * Wnt1 down vs E11.5 * Ctrl |
| 10549473 | Caprin2       | NM_181541    | 3.30574e-005 | -1.35801 | E11.5 * Wnt1 down vs E11.5 * Ctrl |
| 10377662 | Ybx2          | NM_016875    | 0.000417098  | -1.35841 | E11.5 * Wnt1 down vs E11.5 * Ctrl |
| 10355152 | Fzd5          | NM_022721    | 0.0043918    | -1.35843 | E11.5 * Wnt1 down vs E11.5 * Ctrl |
| 10593799 | Scaper        | NM_001081341 | 6.11459e-005 | -1.35958 | E11.5 * Wnt1 down vs E11.5 * Ctrl |
| 10408574 | ---           | ---          | 0.00224644   | -1.35974 | E11.5 * Wnt1 down vs E11.5 * Ctrl |
| 10417887 | Zmynd17       | BC119816     | 0.00834187   | -1.36008 | E11.5 * Wnt1 down vs E11.5 * Ctrl |
| 10594103 | 2410076I21Rik | ENSMUST00000 | 0.000257328  | -1.3602  | E11.5 * Wnt1 down vs E11.5 * Ctrl |
| 10547322 | Cacna1c       | NM_001159533 | 1.31679e-005 | -1.3602  | E11.5 * Wnt1 down vs E11.5 * Ctrl |
| 10459496 | Ccbe1         | NM_178793    | 2.54233e-006 | -1.36031 | E11.5 * Wnt1 down vs E11.5 * Ctrl |
| 10528664 | Smarcd3       | NM_025891    | 0.000942496  | -1.36037 | E11.5 * Wnt1 down vs E11.5 * Ctrl |
| 10605181 | Renbp         | NM_023132    | 0.00427775   | -1.36083 | E11.5 * Wnt1 down vs E11.5 * Ctrl |
| 10530269 | Rbm47         | NM_178446    | 0.00270867   | -1.36086 | E11.5 * Wnt1 down vs E11.5 * Ctrl |
| 10361186 | Sertad4       | NM_198247    | 9.09896e-005 | -1.36146 | E11.5 * Wnt1 down vs E11.5 * Ctrl |
| 10425761 | ---           | ---          | 0.00016409   | -1.36158 | E11.5 * Wnt1 down vs E11.5 * Ctrl |
| 10596072 | 3222402P14Rik | BC151170     | 0.000221647  | -1.36161 | E11.5 * Wnt1 down vs E11.5 * Ctrl |
| 10515771 | Tie1          | NM_011587    | 0.00032721   | -1.36168 | E11.5 * Wnt1 down vs E11.5 * Ctrl |
| 10415742 | Mipep         | NM_027436    | 0.000393954  | -1.36233 | E11.5 * Wnt1 down vs E11.5 * Ctrl |
| 10455738 | Snx2          | NM_026386    | 4.90687e-006 | -1.36248 | E11.5 * Wnt1 down vs E11.5 * Ctrl |
| 10584591 | ---           | ---          | 0.000115316  | -1.36281 | E11.5 * Wnt1 down vs E11.5 * Ctrl |
| 10382438 | Cd300a        | NM_170758    | 0.00143511   | -1.36287 | E11.5 * Wnt1 down vs E11.5 * Ctrl |
| 10379034 | Tlcd1         | NM_026708    | 0.0027165    | -1.36333 | E11.5 * Wnt1 down vs E11.5 * Ctrl |
| 10351679 | Cd84          | NM_013489    | 0.00461257   | -1.36371 | E11.5 * Wnt1 down vs E11.5 * Ctrl |

|                        |              |              |          |                                   |
|------------------------|--------------|--------------|----------|-----------------------------------|
| 10446425               | ---          | 0.00361027   | -1.3641  | E11.5 * Wnt1 down vs E11.5 * Ctrl |
| 10404132 Cmah          | NM_001111110 | 0.00788985   | -1.3643  | E11.5 * Wnt1 down vs E11.5 * Ctrl |
| 10464328 Pnliprp2      | NM_011128    | 0.000224961  | -1.36439 | E11.5 * Wnt1 down vs E11.5 * Ctrl |
| 10428536 Trps1         | NM_032000    | 0.00104943   | -1.3646  | E11.5 * Wnt1 down vs E11.5 * Ctrl |
| 10559200 Tnni2         | NM_009405    | 0.000139126  | -1.36469 | E11.5 * Wnt1 down vs E11.5 * Ctrl |
| 10419286 ENSMUSG00000  | ENSMUST00000 | 0.00654049   | -1.36503 | E11.5 * Wnt1 down vs E11.5 * Ctrl |
| 10439830               | ---          | 0.00875684   | -1.36623 | E11.5 * Wnt1 down vs E11.5 * Ctrl |
| 10421293 Ppp3cc        | NM_008915    | 0.00242532   | -1.36631 | E11.5 * Wnt1 down vs E11.5 * Ctrl |
| 10605303 Dnase1l1      | NM_027109    | 8.11143e-005 | -1.36641 | E11.5 * Wnt1 down vs E11.5 * Ctrl |
| 10477942 Rbl1          | NM_011249    | 0.0030814    | -1.36747 | E11.5 * Wnt1 down vs E11.5 * Ctrl |
| 10584855 Scn2b         | NM_001014761 | 0.000184932  | -1.36756 | E11.5 * Wnt1 down vs E11.5 * Ctrl |
| 10360412 Olfr419       | NM_146715    | 0.000700645  | -1.36764 | E11.5 * Wnt1 down vs E11.5 * Ctrl |
| 10406407 Arrdc3        | NM_001042591 | 0.00561145   | -1.36787 | E11.5 * Wnt1 down vs E11.5 * Ctrl |
| 10440393 Samsn1        | NM_023380    | 0.000374954  | -1.36879 | E11.5 * Wnt1 down vs E11.5 * Ctrl |
| 10605370 Mpp1          | NM_008621    | 0.00101332   | -1.36885 | E11.5 * Wnt1 down vs E11.5 * Ctrl |
| 10381588 Grn           | NM_008175    | 0.00159547   | -1.36891 | E11.5 * Wnt1 down vs E11.5 * Ctrl |
| 10537179 Bpgm          | NM_007563    | 0.000649877  | -1.36913 | E11.5 * Wnt1 down vs E11.5 * Ctrl |
| 10485948 Grem1         | NM_011824    | 0.00589121   | -1.36961 | E11.5 * Wnt1 down vs E11.5 * Ctrl |
| 10457407               | ---          | 4.906e-006   | -1.36967 | E11.5 * Wnt1 down vs E11.5 * Ctrl |
| 10500610 Fam46c        | NM_001142952 | 0.00667661   | -1.37013 | E11.5 * Wnt1 down vs E11.5 * Ctrl |
| 10575844 Cdh13         | NM_019707    | 0.00329226   | -1.37044 | E11.5 * Wnt1 down vs E11.5 * Ctrl |
| 10492864 Sh3d19        | NM_001082414 | 9.28569e-005 | -1.37069 | E11.5 * Wnt1 down vs E11.5 * Ctrl |
| 10552363 l1C0022H11Rik | NM_001034893 | 0.000233517  | -1.37083 | E11.5 * Wnt1 down vs E11.5 * Ctrl |
| 10596095 Ephb1         | NM_173447    | 0.000202751  | -1.37094 | E11.5 * Wnt1 down vs E11.5 * Ctrl |
| 10552469 Klk13         | NM_001039042 | 1.28693e-005 | -1.37199 | E11.5 * Wnt1 down vs E11.5 * Ctrl |
| 10573939 Lpcat2        | NM_173014    | 0.00126384   | -1.3722  | E11.5 * Wnt1 down vs E11.5 * Ctrl |
| 10578690 Neil3         | NM_146208    | 0.000144993  | -1.37231 | E11.5 * Wnt1 down vs E11.5 * Ctrl |
| 10368356 Akap7         | NM_018747    | 0.000339278  | -1.37273 | E11.5 * Wnt1 down vs E11.5 * Ctrl |
| 10401028 Sgpp1         | NM_030750    | 0.00575051   | -1.37286 | E11.5 * Wnt1 down vs E11.5 * Ctrl |
| 10578241 A730069N07Rik | NM_178735    | 3.53219e-005 | -1.37321 | E11.5 * Wnt1 down vs E11.5 * Ctrl |
| 10531479 493243015Rik  | ENSMUST00000 | 0.000191948  | -1.37338 | E11.5 * Wnt1 down vs E11.5 * Ctrl |
| 10440425               | ---          | 0.00507205   | -1.37352 | E11.5 * Wnt1 down vs E11.5 * Ctrl |
| 10396278 Daam1         | NM_026102    | 5.34698e-005 | -1.37407 | E11.5 * Wnt1 down vs E11.5 * Ctrl |
| 10364262 Itgb2         | NM_008404    | 0.000587758  | -1.37515 | E11.5 * Wnt1 down vs E11.5 * Ctrl |
| 10423230 Cdh9          | NM_009869    | 0.00110477   | -1.37533 | E11.5 * Wnt1 down vs E11.5 * Ctrl |
| 10425410 Grap2         | NM_010815    | 0.000643775  | -1.37582 | E11.5 * Wnt1 down vs E11.5 * Ctrl |
| 10487208 Atp8b4        | NM_001080944 | 0.000161524  | -1.37623 | E11.5 * Wnt1 down vs E11.5 * Ctrl |
| 10552358 l1C0022H11Rik | NM_001034893 | 0.000334299  | -1.37635 | E11.5 * Wnt1 down vs E11.5 * Ctrl |
| 10365420 Al597468      | NM_001013028 | 7.18874e-006 | -1.37666 | E11.5 * Wnt1 down vs E11.5 * Ctrl |
| 10420171 Adcy4         | NM_080435    | 0.00808225   | -1.37687 | E11.5 * Wnt1 down vs E11.5 * Ctrl |
| 10602105 Col4a5        | NM_007736    | 0.000327785  | -1.37695 | E11.5 * Wnt1 down vs E11.5 * Ctrl |
| 10539517 Dysf          | NM_021469    | 1.05266e-005 | -1.37707 | E11.5 * Wnt1 down vs E11.5 * Ctrl |
| 10419744 Slc7a7        | NM_011405    | 0.00411802   | -1.37718 | E11.5 * Wnt1 down vs E11.5 * Ctrl |
| 10346348 2810022L02Rik | NM_144882    | 0.000389716  | -1.37761 | E11.5 * Wnt1 down vs E11.5 * Ctrl |
| 10500911 Mov10         | NM_008619    | 0.000928327  | -1.3777  | E11.5 * Wnt1 down vs E11.5 * Ctrl |
| 10428302 Klfl10        | NM_013692    | 7.40865e-005 | -1.37791 | E11.5 * Wnt1 down vs E11.5 * Ctrl |
| 10356278 Sp110         | NM_175397    | 0.000128605  | -1.37802 | E11.5 * Wnt1 down vs E11.5 * Ctrl |
| 10560329 Hif3a         | NM_016868    | 0.000302026  | -1.37839 | E11.5 * Wnt1 down vs E11.5 * Ctrl |
| 10391119 1110036O03Rik | NM_176830    | 3.92384e-006 | -1.3785  | E11.5 * Wnt1 down vs E11.5 * Ctrl |
| 10544763 Hoxa4         | NM_008265    | 0.00015536   | -1.37927 | E11.5 * Wnt1 down vs E11.5 * Ctrl |
| 10372988 Slc16a7       | NM_011391    | 0.00442616   | -1.37999 | E11.5 * Wnt1 down vs E11.5 * Ctrl |
| 10381603 Fzd2          | NM_020510    | 0.00335181   | -1.38    | E11.5 * Wnt1 down vs E11.5 * Ctrl |
| 10346722 Nbeal1        | NM_173444    | 0.000471835  | -1.38033 | E11.5 * Wnt1 down vs E11.5 * Ctrl |
| 10578324 Mtus1         | NM_001005863 | 2.88209e-005 | -1.38053 | E11.5 * Wnt1 down vs E11.5 * Ctrl |
| 10524878 BC023744      | NM_001033311 | 0.00138852   | -1.38063 | E11.5 * Wnt1 down vs E11.5 * Ctrl |
| 10472514 Nostrin       | NM_181547    | 0.00376245   | -1.38121 | E11.5 * Wnt1 down vs E11.5 * Ctrl |
| 10399965 F730043M19Rik | ENSMUST00000 | 0.00373659   | -1.38161 | E11.5 * Wnt1 down vs E11.5 * Ctrl |
| 10568355 Pycard        | NM_023258    | 0.00341353   | -1.38161 | E11.5 * Wnt1 down vs E11.5 * Ctrl |
| 10399148 Rapgef5       | NM_175930    | 0.00285495   | -1.38175 | E11.5 * Wnt1 down vs E11.5 * Ctrl |
| 10594661 Tpm1          | NM_024427    | 7.06093e-005 | -1.3818  | E11.5 * Wnt1 down vs E11.5 * Ctrl |
| 10416700 Pcdh17        | NM_001013753 | 0.00317427   | -1.38258 | E11.5 * Wnt1 down vs E11.5 * Ctrl |
| 10476560 lsm1          | NM_001126490 | 0.00552798   | -1.38301 | E11.5 * Wnt1 down vs E11.5 * Ctrl |
| 10553354 Nav2          | NM_175272    | 6.24184e-005 | -1.38352 | E11.5 * Wnt1 down vs E11.5 * Ctrl |
| 10599736 Fhl1          | NM_001077361 | 7.48645e-006 | -1.38381 | E11.5 * Wnt1 down vs E11.5 * Ctrl |
| 10473809 Sfpi1         | NM_011355    | 2.66476e-005 | -1.38408 | E11.5 * Wnt1 down vs E11.5 * Ctrl |
| 10550877 Kcnn4         | NM_008433    | 4.45148e-005 | -1.38409 | E11.5 * Wnt1 down vs E11.5 * Ctrl |

|          |               |              |              |          |                                   |
|----------|---------------|--------------|--------------|----------|-----------------------------------|
| 10583669 | AB124611      | AB124611     | 0.00309471   | -1.38489 | E11.5 * Wnt1 down vs E11.5 * Ctrl |
| 10548875 | Art4          | NM_026639    | 8.35166e-005 | -1.38527 | E11.5 * Wnt1 down vs E11.5 * Ctrl |
| 10394789 | B430203G13Rik | AK046603     | 9.9922e-005  | -1.38534 | E11.5 * Wnt1 down vs E11.5 * Ctrl |
| 10528008 | Steap2        | NM_001103157 | 0.00140941   | -1.38545 | E11.5 * Wnt1 down vs E11.5 * Ctrl |
| 10361139 | Traf5         | NM_011633    | 0.000414263  | -1.38607 | E11.5 * Wnt1 down vs E11.5 * Ctrl |
| 10362630 | ---           | ---          | 0.00370467   | -1.38634 | E11.5 * Wnt1 down vs E11.5 * Ctrl |
| 10514000 | Mpdz          | NM_010820    | 7.98664e-006 | -1.38651 | E11.5 * Wnt1 down vs E11.5 * Ctrl |
| 10473432 | Tnks1bp1      | NM_001081260 | 0.000303159  | -1.38663 | E11.5 * Wnt1 down vs E11.5 * Ctrl |
| 10358982 | Mr1           | NM_008209    | 0.00615351   | -1.3867  | E11.5 * Wnt1 down vs E11.5 * Ctrl |
| 10516481 | Gja4          | NM_008120    | 0.000230837  | -1.38672 | E11.5 * Wnt1 down vs E11.5 * Ctrl |
| 10506154 | Alg6          | NM_001081264 | 0.00378113   | -1.38688 | E11.5 * Wnt1 down vs E11.5 * Ctrl |
| 10539773 | Gfpt1         | NM_013528    | 0.00040034   | -1.38726 | E11.5 * Wnt1 down vs E11.5 * Ctrl |
| 10381122 | Fkbp10        | NM_010221    | 0.00214077   | -1.3873  | E11.5 * Wnt1 down vs E11.5 * Ctrl |
| 10530592 | Fryl          | NM_177136    | 0.000272409  | -1.38769 | E11.5 * Wnt1 down vs E11.5 * Ctrl |
| 10372280 | EG628870      | XM_893664    | 0.000294589  | -1.38797 | E11.5 * Wnt1 down vs E11.5 * Ctrl |
| 10581538 | Nqo1          | NM_008706    | 0.00699245   | -1.38807 | E11.5 * Wnt1 down vs E11.5 * Ctrl |
| 10416785 | 4930517O19Rik | ENSMUST00000 | 0.00106633   | -1.38851 | E11.5 * Wnt1 down vs E11.5 * Ctrl |
| 10513160 | Ptpn3         | NM_011207    | 0.000428108  | -1.38876 | E11.5 * Wnt1 down vs E11.5 * Ctrl |
| 10531994 | Mpa2l         | NM_194336    | 9.43944e-005 | -1.3888  | E11.5 * Wnt1 down vs E11.5 * Ctrl |
| 10458999 | Fbn2          | NM_010181    | 0.000398237  | -1.38883 | E11.5 * Wnt1 down vs E11.5 * Ctrl |
| 10346878 | Zdbf2         | ENSMUST00000 | 6.47799e-005 | -1.38891 | E11.5 * Wnt1 down vs E11.5 * Ctrl |
| 10451613 | Foxp4         | NM_001110824 | 0.00280485   | -1.38945 | E11.5 * Wnt1 down vs E11.5 * Ctrl |
| 10399671 | Hpcal1        | NM_016677    | 0.000143021  | -1.38954 | E11.5 * Wnt1 down vs E11.5 * Ctrl |
| 10498992 | Tlr2          | NM_011905    | 0.00146723   | -1.39013 | E11.5 * Wnt1 down vs E11.5 * Ctrl |
| 10473406 | Prg3          | NM_016914    | 0.000349927  | -1.3903  | E11.5 * Wnt1 down vs E11.5 * Ctrl |
| 10449419 | Tead3         | NM_001098226 | 0.00293181   | -1.39165 | E11.5 * Wnt1 down vs E11.5 * Ctrl |
| 10485378 | 2600010E01Rik | NM_001083810 | 0.001768     | -1.39166 | E11.5 * Wnt1 down vs E11.5 * Ctrl |
| 10588263 | Slco2a1       | NM_033314    | 0.00702084   | -1.39166 | E11.5 * Wnt1 down vs E11.5 * Ctrl |
| 10551185 | Tgfb1         | NM_011577    | 0.00106149   | -1.39198 | E11.5 * Wnt1 down vs E11.5 * Ctrl |
| 10427049 | 6030408B16Rik | ENSMUST00000 | 0.000290359  | -1.39212 | E11.5 * Wnt1 down vs E11.5 * Ctrl |
| 10440186 | Crybg3        | NM_174848    | 0.00419358   | -1.39226 | E11.5 * Wnt1 down vs E11.5 * Ctrl |
| 10347792 | ---           | ---          | 0.00409433   | -1.39246 | E11.5 * Wnt1 down vs E11.5 * Ctrl |
| 10482766 | Rprm          | NM_023396    | 0.000537931  | -1.39265 | E11.5 * Wnt1 down vs E11.5 * Ctrl |
| 10383152 | ---           | ---          | 5.80254e-006 | -1.39305 | E11.5 * Wnt1 down vs E11.5 * Ctrl |
| 10564520 | Rpl23         | AF357384     | 0.00500198   | -1.3935  | E11.5 * Wnt1 down vs E11.5 * Ctrl |
| 10437673 | Tnp2          | NM_013694    | 0.0011812    | -1.39433 | E11.5 * Wnt1 down vs E11.5 * Ctrl |
| 10427303 | Hoxc4         | NM_013553    | 0.00148605   | -1.3944  | E11.5 * Wnt1 down vs E11.5 * Ctrl |
| 10490854 | OTTMUSG00000  | NM_001037926 | 0.00205173   | -1.39453 | E11.5 * Wnt1 down vs E11.5 * Ctrl |
| 10540359 | Cntn4         | NM_001109749 | 0.00045548   | -1.39463 | E11.5 * Wnt1 down vs E11.5 * Ctrl |
| 10369690 | Tet1          | AK129421     | 1.63713e-005 | -1.39483 | E11.5 * Wnt1 down vs E11.5 * Ctrl |
| 10462195 | Kank1         | NM_181404    | 0.000321981  | -1.39504 | E11.5 * Wnt1 down vs E11.5 * Ctrl |
| 10528332 | Napepld       | NM_178728    | 5.36855e-006 | -1.39509 | E11.5 * Wnt1 down vs E11.5 * Ctrl |
| 10398432 | ---           | ---          | 0.00160174   | -1.3952  | E11.5 * Wnt1 down vs E11.5 * Ctrl |
| 10446619 | Myom1         | NM_010867    | 0.00113363   | -1.39551 | E11.5 * Wnt1 down vs E11.5 * Ctrl |
| 10491623 | 4932438A13Rik | NM_172679    | 0.00454219   | -1.39553 | E11.5 * Wnt1 down vs E11.5 * Ctrl |
| 10478744 | ---           | ---          | 0.00813397   | -1.39563 | E11.5 * Wnt1 down vs E11.5 * Ctrl |
| 10414805 | Trav13d-4     | ENSMUST00000 | 0.00398536   | -1.39615 | E11.5 * Wnt1 down vs E11.5 * Ctrl |
| 10384770 | 5730522E02Rik | ENSMUST00000 | 0.000146996  | -1.39657 | E11.5 * Wnt1 down vs E11.5 * Ctrl |
| 10369264 | Oit3          | NM_010959    | 2.32041e-005 | -1.39719 | E11.5 * Wnt1 down vs E11.5 * Ctrl |
| 10372796 | Hmga2         | NM_010441    | 0.000254734  | -1.39747 | E11.5 * Wnt1 down vs E11.5 * Ctrl |
| 10510167 | OTTMUSG00000  | NM_001037926 | 0.000966029  | -1.39822 | E11.5 * Wnt1 down vs E11.5 * Ctrl |
| 10389134 | Slnf9         | NM_172796    | 5.02369e-005 | -1.3988  | E11.5 * Wnt1 down vs E11.5 * Ctrl |
| 10357003 | Rnf152        | NM_178779    | 0.00529393   | -1.39918 | E11.5 * Wnt1 down vs E11.5 * Ctrl |
| 10597973 | Lztlf1        | NM_033322    | 0.000202127  | -1.40035 | E11.5 * Wnt1 down vs E11.5 * Ctrl |
| 10564539 | Mctp2         | NM_001024703 | 0.000451143  | -1.40087 | E11.5 * Wnt1 down vs E11.5 * Ctrl |
| 10353524 | Ogfrl1        | NM_001081079 | 0.000343467  | -1.40092 | E11.5 * Wnt1 down vs E11.5 * Ctrl |
| 10366004 | Atp2b1        | NM_026482    | 1.22484e-009 | -1.4013  | E11.5 * Wnt1 down vs E11.5 * Ctrl |
| 10403081 | Wdr60         | NM_146039    | 0.000138307  | -1.40135 | E11.5 * Wnt1 down vs E11.5 * Ctrl |
| 10366886 | Arhgap9       | NM_146011    | 0.000276182  | -1.40164 | E11.5 * Wnt1 down vs E11.5 * Ctrl |
| 10418244 | Fam116a       | NM_001134465 | 0.00152696   | -1.40253 | E11.5 * Wnt1 down vs E11.5 * Ctrl |
| 10406982 | Adamts6       | NM_001081020 | 0.0033782    | -1.40264 | E11.5 * Wnt1 down vs E11.5 * Ctrl |
| 10506767 | Echdc2        | NM_026728    | 0.00011146   | -1.40365 | E11.5 * Wnt1 down vs E11.5 * Ctrl |
| 10404301 | Prl3a1        | NM_025896    | 0.000230004  | -1.40376 | E11.5 * Wnt1 down vs E11.5 * Ctrl |
| 10395428 | Dgkb          | NM_178681    | 0.00383488   | -1.40377 | E11.5 * Wnt1 down vs E11.5 * Ctrl |
| 10524310 | Ttc28         | BC002262     | 0.00872753   | -1.40402 | E11.5 * Wnt1 down vs E11.5 * Ctrl |
| 10549879 | Usp29         | NM_021323    | 0.00112089   | -1.40429 | E11.5 * Wnt1 down vs E11.5 * Ctrl |

|          |                 |              |              |          |                                   |
|----------|-----------------|--------------|--------------|----------|-----------------------------------|
| 10455118 | Pcdhb18         | NM_053143    | 0.00184197   | -1.40454 | E11.5 * Wnt1 down vs E11.5 * Ctrl |
| 10508972 | 434166 BC080727 |              | 0.000481705  | -1.40457 | E11.5 * Wnt1 down vs E11.5 * Ctrl |
| 10522925 | Prol1           | NM_008644    | 0.000204833  | -1.40479 | E11.5 * Wnt1 down vs E11.5 * Ctrl |
| 10607870 | Tlr7            | NM_133211    | 0.000557952  | -1.4049  | E11.5 * Wnt1 down vs E11.5 * Ctrl |
| 10589884 | Bcl2a1c         | NM_007535    | 0.000220336  | -1.40515 | E11.5 * Wnt1 down vs E11.5 * Ctrl |
| 10369116 | Mcm9            | NM_027830    | 0.00212683   | -1.40562 | E11.5 * Wnt1 down vs E11.5 * Ctrl |
| 10379389 | Adap2           | NM_172133    | 0.000201783  | -1.40568 | E11.5 * Wnt1 down vs E11.5 * Ctrl |
| 10607562 | Cnksr2          | NM_177751    | 0.000538466  | -1.4064  | E11.5 * Wnt1 down vs E11.5 * Ctrl |
| 10530100 | Arap2           | NM_178407    | 0.002444     | -1.40647 | E11.5 * Wnt1 down vs E11.5 * Ctrl |
| 10436550 | ---             |              | 0.0028425    | -1.40689 | E11.5 * Wnt1 down vs E11.5 * Ctrl |
| 10479165 | Edn3            | NM_007903    | 6.89849e-006 | -1.40692 | E11.5 * Wnt1 down vs E11.5 * Ctrl |
| 10584827 | Mpzl2           | NM_007962    | 0.00178612   | -1.40725 | E11.5 * Wnt1 down vs E11.5 * Ctrl |
| 10498386 | Igsf10          | ENSMUST00000 | 7.22446e-005 | -1.40739 | E11.5 * Wnt1 down vs E11.5 * Ctrl |
| 10579776 | Arhgap10        | NM_030113    | 1.71684e-005 | -1.40745 | E11.5 * Wnt1 down vs E11.5 * Ctrl |
| 10583163 | Trpc6           | NM_013838    | 0.000202013  | -1.40751 | E11.5 * Wnt1 down vs E11.5 * Ctrl |
| 10466200 | Ms4a7           | NM_027836    | 0.00305677   | -1.40776 | E11.5 * Wnt1 down vs E11.5 * Ctrl |
| 10544798 | Hoxa10          | NM_008263    | 8.76563e-005 | -1.40822 | E11.5 * Wnt1 down vs E11.5 * Ctrl |
| 10556082 | Ppfbp2          | NM_008905    | 0.000355398  | -1.40829 | E11.5 * Wnt1 down vs E11.5 * Ctrl |
| 10424252 | Wdyhv1          | NM_029734    | 0.00248912   | -1.40835 | E11.5 * Wnt1 down vs E11.5 * Ctrl |
| 10435345 | Mylk            | NM_139300    | 9.82762e-005 | -1.4084  | E11.5 * Wnt1 down vs E11.5 * Ctrl |
| 10561055 | Ceacam2         | NM_001113368 | 0.0048413    | -1.40841 | E11.5 * Wnt1 down vs E11.5 * Ctrl |
| 10524312 | Ttc28           | ENSMUST00000 | 0.000766227  | -1.40876 | E11.5 * Wnt1 down vs E11.5 * Ctrl |
| 10357008 | Pign            | NM_013784    | 3.06189e-006 | -1.40886 | E11.5 * Wnt1 down vs E11.5 * Ctrl |
| 10597279 | Ccrl2           | NM_017466    | 0.00598358   | -1.40911 | E11.5 * Wnt1 down vs E11.5 * Ctrl |
| 10497079 | Ptger3          | NM_011196    | 7.32709e-005 | -1.40919 | E11.5 * Wnt1 down vs E11.5 * Ctrl |
| 10418848 | Wdfy4           | NM_001146022 | 0.000266185  | -1.40938 | E11.5 * Wnt1 down vs E11.5 * Ctrl |
| 10586446 | ---             |              | 0.00106242   | -1.40965 | E11.5 * Wnt1 down vs E11.5 * Ctrl |
| 10361381 | Syne1           | NM_001079686 | 2.16702e-006 | -1.41084 | E11.5 * Wnt1 down vs E11.5 * Ctrl |
| 10593834 | Rfpl3s          | NM_183111    | 0.00244228   | -1.41147 | E11.5 * Wnt1 down vs E11.5 * Ctrl |
| 10411611 | Naip5           | NM_010870    | 0.00110377   | -1.41239 | E11.5 * Wnt1 down vs E11.5 * Ctrl |
| 10437885 | Myh11           | NM_013607    | 0.00634746   | -1.41254 | E11.5 * Wnt1 down vs E11.5 * Ctrl |
| 10482880 | Baz2b           | NM_001001182 | 5.2886e-007  | -1.41286 | E11.5 * Wnt1 down vs E11.5 * Ctrl |
| 10456745 | Smad7           | NM_001042660 | 0.000337842  | -1.41304 | E11.5 * Wnt1 down vs E11.5 * Ctrl |
| 10382200 | Ccdc46          | NM_029606    | 3.16429e-005 | -1.41308 | E11.5 * Wnt1 down vs E11.5 * Ctrl |
| 10385903 | Pdlim4          | NM_019417    | 9.57517e-005 | -1.41335 | E11.5 * Wnt1 down vs E11.5 * Ctrl |
| 10600698 | 5430427O19Rik   | BC115576     | 0.00621907   | -1.41354 | E11.5 * Wnt1 down vs E11.5 * Ctrl |
| 10398388 | ---             |              | 0.000560687  | -1.41458 | E11.5 * Wnt1 down vs E11.5 * Ctrl |
| 10560190 | Ehd2            | NM_153068    | 0.000405379  | -1.41462 | E11.5 * Wnt1 down vs E11.5 * Ctrl |
| 10389786 | Hlf             | NM_172563    | 7.86348e-005 | -1.41462 | E11.5 * Wnt1 down vs E11.5 * Ctrl |
| 10389929 | Cacna1g         | NM_009783    | 0.000482008  | -1.41514 | E11.5 * Wnt1 down vs E11.5 * Ctrl |
| 10434778 | Rtp4            | NM_023386    | 0.00153461   | -1.41531 | E11.5 * Wnt1 down vs E11.5 * Ctrl |
| 10497731 | Ccdc39          | NM_026222    | 0.000558221  | -1.41577 | E11.5 * Wnt1 down vs E11.5 * Ctrl |
| 10385526 | 9930111J21Rik   | NM_173434    | 0.00147579   | -1.41602 | E11.5 * Wnt1 down vs E11.5 * Ctrl |
| 10399046 | Vipr2           | NM_009511    | 0.00379172   | -1.41611 | E11.5 * Wnt1 down vs E11.5 * Ctrl |
| 10399232 | ENSMUSG00000    | ENSMUST00000 | 1.3715e-006  | -1.41612 | E11.5 * Wnt1 down vs E11.5 * Ctrl |
| 10491627 | 4932438A13Rik   | NM_172679    | 0.00567322   | -1.41658 | E11.5 * Wnt1 down vs E11.5 * Ctrl |
| 10354563 | Dnahc7b         | ENSMUST00000 | 0.00864074   | -1.41658 | E11.5 * Wnt1 down vs E11.5 * Ctrl |
| 10590060 | Ctdspl          | NM_133710    | 7.0687e-006  | -1.41697 | E11.5 * Wnt1 down vs E11.5 * Ctrl |
| 10561104 | Axl             | NM_009465    | 0.000594632  | -1.41768 | E11.5 * Wnt1 down vs E11.5 * Ctrl |
| 10384780 | Fancl           | NM_025923    | 0.00814449   | -1.41846 | E11.5 * Wnt1 down vs E11.5 * Ctrl |
| 10368527 | Hint3           | NM_025798    | 0.00313819   | -1.41873 | E11.5 * Wnt1 down vs E11.5 * Ctrl |
| 10495596 | Frrs1           | NM_001113478 | 0.00196851   | -1.41911 | E11.5 * Wnt1 down vs E11.5 * Ctrl |
| 10453233 | Slc8a1          | NM_011406    | 9.76491e-005 | -1.41913 | E11.5 * Wnt1 down vs E11.5 * Ctrl |
| 10454632 | Camk4           | NM_009793    | 0.00307189   | -1.41949 | E11.5 * Wnt1 down vs E11.5 * Ctrl |
| 10428534 | Trps1           | NM_032000    | 0.000441535  | -1.41951 | E11.5 * Wnt1 down vs E11.5 * Ctrl |
| 10482500 | Rnd3            | NM_028810    | 2.88784e-005 | -1.41959 | E11.5 * Wnt1 down vs E11.5 * Ctrl |
| 10390186 | Abi3            | NM_025659    | 2.01388e-005 | -1.42115 | E11.5 * Wnt1 down vs E11.5 * Ctrl |
| 10504106 | Il11ra1         | NM_010549    | 7.85291e-005 | -1.42126 | E11.5 * Wnt1 down vs E11.5 * Ctrl |
| 10573924 | Mmp2            | NM_008610    | 0.00135389   | -1.42183 | E11.5 * Wnt1 down vs E11.5 * Ctrl |
| 10449280 | EG383229        | XM_356935    | 0.00654421   | -1.42214 | E11.5 * Wnt1 down vs E11.5 * Ctrl |
| 10466573 | Ostf1           | NM_017375    | 0.00178149   | -1.42242 | E11.5 * Wnt1 down vs E11.5 * Ctrl |
| 10466624 | Aldh1a7         | NM_011921    | 0.00781235   | -1.42383 | E11.5 * Wnt1 down vs E11.5 * Ctrl |
| 10356293 | A630001G21Rik   | BC052931     | 0.00107615   | -1.42435 | E11.5 * Wnt1 down vs E11.5 * Ctrl |
| 10422962 | 1110020G09Rik   | NM_001085410 | 4.95513e-006 | -1.42476 | E11.5 * Wnt1 down vs E11.5 * Ctrl |
| 10498647 | B3galnt1        | NM_020026    | 6.12769e-007 | -1.42544 | E11.5 * Wnt1 down vs E11.5 * Ctrl |
| 10507101 | OTTMUSG00000    | NM_001085549 | 0.00020329   | -1.42641 | E11.5 * Wnt1 down vs E11.5 * Ctrl |

|          |               |              |              |          |                                   |
|----------|---------------|--------------|--------------|----------|-----------------------------------|
| 10435457 | Parp9         | NM_030253    | 0.000187205  | -1.42648 | E11.5 * Wnt1 down vs E11.5 * Ctrl |
| 10461587 | Ms4a4a        | XM_889011    | 0.00516102   | -1.42683 | E11.5 * Wnt1 down vs E11.5 * Ctrl |
| 10469167 | Sfmbt2        | NM_177386    | 1.84261e-008 | -1.42724 | E11.5 * Wnt1 down vs E11.5 * Ctrl |
| 10356968 | Pam           | NM_013626    | 0.000285567  | -1.42746 | E11.5 * Wnt1 down vs E11.5 * Ctrl |
| 10392177 | Icam2         | NM_010494    | 8.60902e-005 | -1.42766 | E11.5 * Wnt1 down vs E11.5 * Ctrl |
| 10475218 | ---           | ---          | 0.00454075   | -1.42785 | E11.5 * Wnt1 down vs E11.5 * Ctrl |
| 10606445 | Rps6ka6       | NM_025949    | 2.98503e-005 | -1.42786 | E11.5 * Wnt1 down vs E11.5 * Ctrl |
| 10542885 | 2810474O19Rik | NM_026054    | 0.000775758  | -1.4284  | E11.5 * Wnt1 down vs E11.5 * Ctrl |
| 10599693 | Ncrna00086    | BC052359     | 0.00498168   | -1.42858 | E11.5 * Wnt1 down vs E11.5 * Ctrl |
| 10597074 | ---           | ---          | 1.39605e-005 | -1.42906 | E11.5 * Wnt1 down vs E11.5 * Ctrl |
| 10431935 | Amigo2        | NM_178114    | 0.00221555   | -1.42928 | E11.5 * Wnt1 down vs E11.5 * Ctrl |
| 10356333 | Snord82       | NR_002851    | 0.00350119   | -1.42951 | E11.5 * Wnt1 down vs E11.5 * Ctrl |
| 10455123 | Pcdhb19       | NM_053144    | 0.00373127   | -1.42962 | E11.5 * Wnt1 down vs E11.5 * Ctrl |
| 10566333 | 9230105E10Rik | NM_001146007 | 8.36597e-006 | -1.43042 | E11.5 * Wnt1 down vs E11.5 * Ctrl |
| 10538142 | Gimap5        | NM_175035    | 0.000226814  | -1.43043 | E11.5 * Wnt1 down vs E11.5 * Ctrl |
| 10570639 | 6820431F20Rik | BC025151     | 0.000254151  | -1.4308  | E11.5 * Wnt1 down vs E11.5 * Ctrl |
| 10607658 | Reps2         | NM_178256    | 0.00126662   | -1.43087 | E11.5 * Wnt1 down vs E11.5 * Ctrl |
| 10489878 | Ptgis         | NM_008968    | 8.72624e-005 | -1.43181 | E11.5 * Wnt1 down vs E11.5 * Ctrl |
| 10434229 | Cldn5         | NM_013805    | 0.000217888  | -1.43181 | E11.5 * Wnt1 down vs E11.5 * Ctrl |
| 10481592 | Dnm1          | NM_010065    | 0.000404377  | -1.43201 | E11.5 * Wnt1 down vs E11.5 * Ctrl |
| 10455873 | Slc12a2       | NM_009194    | 3.84276e-005 | -1.43231 | E11.5 * Wnt1 down vs E11.5 * Ctrl |
| 10501164 | Csf1          | NM_007778    | 0.00794374   | -1.43248 | E11.5 * Wnt1 down vs E11.5 * Ctrl |
| 10376074 | P4ha2         | NM_001136076 | 0.00628765   | -1.43364 | E11.5 * Wnt1 down vs E11.5 * Ctrl |
| 10445767 | Trem12        | NM_001033405 | 0.00157823   | -1.43383 | E11.5 * Wnt1 down vs E11.5 * Ctrl |
| 10597239 | Pth1r         | NM_011199    | 2.40513e-005 | -1.43394 | E11.5 * Wnt1 down vs E11.5 * Ctrl |
| 10346072 | ---           | ---          | 0.000132727  | -1.43667 | E11.5 * Wnt1 down vs E11.5 * Ctrl |
| 10487987 | Lrrn4         | NM_177303    | 0.000243305  | -1.43728 | E11.5 * Wnt1 down vs E11.5 * Ctrl |
| 10544133 | Parp12        | NM_172893    | 0.00109841   | -1.43755 | E11.5 * Wnt1 down vs E11.5 * Ctrl |
| 10353258 | 4930444P10Rik | ENSMUST00000 | 0.000533893  | -1.4376  | E11.5 * Wnt1 down vs E11.5 * Ctrl |
| 10390117 | Itga3         | NM_013565    | 0.000297989  | -1.43761 | E11.5 * Wnt1 down vs E11.5 * Ctrl |
| 10603567 | Dynlt3        | NM_025975    | 0.00148726   | -1.43822 | E11.5 * Wnt1 down vs E11.5 * Ctrl |
| 10558410 | Ptpre         | NM_011212    | 0.00106405   | -1.43832 | E11.5 * Wnt1 down vs E11.5 * Ctrl |
| 10582868 | Sp110         | NM_175397    | 0.00023491   | -1.43861 | E11.5 * Wnt1 down vs E11.5 * Ctrl |
| 10548333 | Cd69          | NM_001033122 | 0.00216041   | -1.43949 | E11.5 * Wnt1 down vs E11.5 * Ctrl |
| 10444028 | Kank3         | NM_030697    | 0.000258736  | -1.44034 | E11.5 * Wnt1 down vs E11.5 * Ctrl |
| 10407420 | Net1          | NM_019671    | 0.000454696  | -1.44035 | E11.5 * Wnt1 down vs E11.5 * Ctrl |
| 10410743 | Ankrd32       | NM_134071    | 0.00202172   | -1.44071 | E11.5 * Wnt1 down vs E11.5 * Ctrl |
| 10514133 | Ttc39b        | NM_027238    | 0.000265296  | -1.44077 | E11.5 * Wnt1 down vs E11.5 * Ctrl |
| 10504137 | 4933409K07Rik | BC072647     | 0.00221878   | -1.44098 | E11.5 * Wnt1 down vs E11.5 * Ctrl |
| 10504201 | 4933409K07Rik | BC072647     | 0.00221878   | -1.44098 | E11.5 * Wnt1 down vs E11.5 * Ctrl |
| 10512350 | 4933409K07Rik | BC072647     | 0.00221878   | -1.44098 | E11.5 * Wnt1 down vs E11.5 * Ctrl |
| 10512352 | 4933409K07Rik | BC072647     | 0.00221878   | -1.44098 | E11.5 * Wnt1 down vs E11.5 * Ctrl |
| 10531952 | Abcg3         | NM_030239    | 0.000222636  | -1.44127 | E11.5 * Wnt1 down vs E11.5 * Ctrl |
| 10361250 | Camk1g        | NM_144817    | 0.000105651  | -1.4414  | E11.5 * Wnt1 down vs E11.5 * Ctrl |
| 10502565 | Clca2         | NM_030601    | 0.00180376   | -1.44141 | E11.5 * Wnt1 down vs E11.5 * Ctrl |
| 10416734 | ---           | ---          | 0.00606985   | -1.44173 | E11.5 * Wnt1 down vs E11.5 * Ctrl |
| 10377429 | Snord118      | X04239       | 0.0023797    | -1.4419  | E11.5 * Wnt1 down vs E11.5 * Ctrl |
| 10399428 | Snord118      | X04239       | 0.0023797    | -1.4419  | E11.5 * Wnt1 down vs E11.5 * Ctrl |
| 10604135 | Dppa3         | NM_139218    | 0.000148142  | -1.4424  | E11.5 * Wnt1 down vs E11.5 * Ctrl |
| 10462535 | B430203M17Rik | NM_177096    | 0.00784693   | -1.4424  | E11.5 * Wnt1 down vs E11.5 * Ctrl |
| 10422598 | Sepp1         | NM_009155    | 0.00322081   | -1.44275 | E11.5 * Wnt1 down vs E11.5 * Ctrl |
| 10598175 | Ear10         | NM_053112    | 0.00049388   | -1.44325 | E11.5 * Wnt1 down vs E11.5 * Ctrl |
| 10536220 | Col1a2        | NM_007743    | 1.41461e-005 | -1.4435  | E11.5 * Wnt1 down vs E11.5 * Ctrl |
| 10471486 | Eng           | NM_001146350 | 2.07295e-005 | -1.44355 | E11.5 * Wnt1 down vs E11.5 * Ctrl |
| 10372618 | Frs2          | NM_177798    | 0.000373714  | -1.44374 | E11.5 * Wnt1 down vs E11.5 * Ctrl |
| 10497862 | Trpc3         | NM_019510    | 0.000199349  | -1.44421 | E11.5 * Wnt1 down vs E11.5 * Ctrl |
| 10497548 | Fndc3b        | NM_173182    | 0.000430963  | -1.44448 | E11.5 * Wnt1 down vs E11.5 * Ctrl |
| 10476740 | Slc24a3       | NM_053195    | 0.0015051    | -1.4447  | E11.5 * Wnt1 down vs E11.5 * Ctrl |
| 10587023 | Rab27a        | NM_023635    | 3.28012e-006 | -1.44527 | E11.5 * Wnt1 down vs E11.5 * Ctrl |
| 10421932 | Pcdh9         | NM_001081377 | 0.00571637   | -1.44608 | E11.5 * Wnt1 down vs E11.5 * Ctrl |
| 10395277 | Sypl          | NM_013635    | 5.10604e-006 | -1.44625 | E11.5 * Wnt1 down vs E11.5 * Ctrl |
| 10467013 | Prkg1         | NM_001013833 | 7.26713e-005 | -1.44653 | E11.5 * Wnt1 down vs E11.5 * Ctrl |
| 10505788 | Acer2         | BC051923     | 0.0011406    | -1.44664 | E11.5 * Wnt1 down vs E11.5 * Ctrl |
| 10385513 | 9930111J21Rik | NM_173434    | 0.00187664   | -1.44675 | E11.5 * Wnt1 down vs E11.5 * Ctrl |
| 10571325 | Mfhas1        | NM_001081279 | 1.64919e-006 | -1.44682 | E11.5 * Wnt1 down vs E11.5 * Ctrl |
| 10505517 | Tlr4          | NM_021297    | 0.000139704  | -1.44744 | E11.5 * Wnt1 down vs E11.5 * Ctrl |

|          |               |              |              |          |                                   |
|----------|---------------|--------------|--------------|----------|-----------------------------------|
| 10541555 | Clec4a1       | NM_199311    | 0.00645402   | -1.44787 | E11.5 * Wnt1 down vs E11.5 * Ctrl |
| 10356520 | Col6a3        | AF064749     | 0.000312839  | -1.44875 | E11.5 * Wnt1 down vs E11.5 * Ctrl |
| 10554059 | ENSMUSG00000  | ENSMUST00000 | 0.00344504   | -1.4495  | E11.5 * Wnt1 down vs E11.5 * Ctrl |
| 10386110 | Hand1         | NM_008213    | 7.93937e-005 | -1.4495  | E11.5 * Wnt1 down vs E11.5 * Ctrl |
| 10433633 | Mkl2          | NM_181860    | 0.000787496  | -1.45012 | E11.5 * Wnt1 down vs E11.5 * Ctrl |
| 10556581 | ENSMUSG00000  | ENSMUST00000 | 0.00260915   | -1.45113 | E11.5 * Wnt1 down vs E11.5 * Ctrl |
| 10395733 | Npas3         | NM_013780    | 0.00197253   | -1.4514  | E11.5 * Wnt1 down vs E11.5 * Ctrl |
| 10429402 | Gpr20         | NM_173365    | 0.000123922  | -1.45168 | E11.5 * Wnt1 down vs E11.5 * Ctrl |
| 10435641 | Fstl1         | NM_008047    | 2.56071e-005 | -1.45185 | E11.5 * Wnt1 down vs E11.5 * Ctrl |
| 10462231 | Dmrt2         | NM_145831    | 0.00725653   | -1.45216 | E11.5 * Wnt1 down vs E11.5 * Ctrl |
| 10413047 | Plau          | NM_008873    | 0.0044841    | -1.45256 | E11.5 * Wnt1 down vs E11.5 * Ctrl |
| 10436608 | Cxadr         | NM_009988    | 5.35374e-006 | -1.45312 | E11.5 * Wnt1 down vs E11.5 * Ctrl |
| 10377534 | A030009H04Rik | AB041807     | 2.42612e-005 | -1.45345 | E11.5 * Wnt1 down vs E11.5 * Ctrl |
| 10402399 | Serpina1a     | NM_009243    | 0.00121269   | -1.45395 | E11.5 * Wnt1 down vs E11.5 * Ctrl |
| 10466224 | Ms4a3         | NM_133246    | 0.00559219   | -1.45442 | E11.5 * Wnt1 down vs E11.5 * Ctrl |
| 10467871 | Dnmbp         | NM_028029    | 0.00134471   | -1.45445 | E11.5 * Wnt1 down vs E11.5 * Ctrl |
| 10404612 | Rreb1         | NM_001013392 | 0.000447875  | -1.45469 | E11.5 * Wnt1 down vs E11.5 * Ctrl |
| 10593198 | Fam55b        | NM_030069    | 0.00283016   | -1.45533 | E11.5 * Wnt1 down vs E11.5 * Ctrl |
| 10384579 | Ugp2          | NM_139297    | 3.29368e-005 | -1.45571 | E11.5 * Wnt1 down vs E11.5 * Ctrl |
| 10542221 | ---           | ---          | 0.000103461  | -1.45583 | E11.5 * Wnt1 down vs E11.5 * Ctrl |
| 10366707 | Avpr1a        | NM_016847    | 0.000479264  | -1.45622 | E11.5 * Wnt1 down vs E11.5 * Ctrl |
| 10591092 | Fat3          | NM_001080814 | 8.56956e-005 | -1.45653 | E11.5 * Wnt1 down vs E11.5 * Ctrl |
| 10387743 | Slc2a4        | NM_009204    | 4.85073e-005 | -1.45685 | E11.5 * Wnt1 down vs E11.5 * Ctrl |
| 10531972 | 5830443L24Rik | NM_029509    | 0.000737747  | -1.45711 | E11.5 * Wnt1 down vs E11.5 * Ctrl |
| 10580990 | Cdh8          | NM_001039154 | 0.00024305   | -1.45809 | E11.5 * Wnt1 down vs E11.5 * Ctrl |
| 10387368 | Tmem88        | NM_025915    | 4.89429e-005 | -1.4582  | E11.5 * Wnt1 down vs E11.5 * Ctrl |
| 10363082 | Lilrb4        | NM_013532    | 9.28794e-005 | -1.45849 | E11.5 * Wnt1 down vs E11.5 * Ctrl |
| 10457587 | Zfp521        | NM_145492    | 4.02187e-006 | -1.45896 | E11.5 * Wnt1 down vs E11.5 * Ctrl |
| 10462507 | Papss2        | NM_011864    | 8.09486e-005 | -1.45902 | E11.5 * Wnt1 down vs E11.5 * Ctrl |
| 10346695 | Nbeal1        | NM_173444    | 1.30746e-006 | -1.45931 | E11.5 * Wnt1 down vs E11.5 * Ctrl |
| 10557853 | B230325K18Rik | ENSMUST00000 | 0.000894197  | -1.46008 | E11.5 * Wnt1 down vs E11.5 * Ctrl |
| 10395978 | Gm527         | BC099503     | 0.000304873  | -1.46135 | E11.5 * Wnt1 down vs E11.5 * Ctrl |
| 10358272 | Lhx9          | NM_001042577 | 1.29318e-005 | -1.4621  | E11.5 * Wnt1 down vs E11.5 * Ctrl |
| 10512949 | Abca1         | NM_013454    | 7.48023e-006 | -1.46211 | E11.5 * Wnt1 down vs E11.5 * Ctrl |
| 10531166 | Adamts3       | NM_001081401 | 0.000229017  | -1.46243 | E11.5 * Wnt1 down vs E11.5 * Ctrl |
| 10424676 | Ly6e          | NM_008529    | 0.00816132   | -1.46333 | E11.5 * Wnt1 down vs E11.5 * Ctrl |
| 10435525 | Iqcb1         | NM_177128    | 0.000110841  | -1.46439 | E11.5 * Wnt1 down vs E11.5 * Ctrl |
| 10531790 | Nkx6-1        | NM_144955    | 1.51886e-005 | -1.46675 | E11.5 * Wnt1 down vs E11.5 * Ctrl |
| 10437639 | Emp2          | NM_007929    | 0.000227549  | -1.46764 | E11.5 * Wnt1 down vs E11.5 * Ctrl |
| 10376239 | Tcp1          | AF357392     | 0.00566481   | -1.46832 | E11.5 * Wnt1 down vs E11.5 * Ctrl |
| 10545086 | Snca          | NM_001042451 | 0.00124095   | -1.46853 | E11.5 * Wnt1 down vs E11.5 * Ctrl |
| 10543952 | 9330158H04Rik | ENSMUST00000 | 0.000676392  | -1.4686  | E11.5 * Wnt1 down vs E11.5 * Ctrl |
| 10430929 | Tbrg3         | BC095996     | 0.00409368   | -1.46862 | E11.5 * Wnt1 down vs E11.5 * Ctrl |
| 10372844 | Rassf3        | NM_138956    | 0.000609816  | -1.46893 | E11.5 * Wnt1 down vs E11.5 * Ctrl |
| 10485405 | Cd44          | NM_009851    | 3.50363e-005 | -1.46977 | E11.5 * Wnt1 down vs E11.5 * Ctrl |
| 10533462 | Rad9b         | NM_144912    | 0.00504483   | -1.46994 | E11.5 * Wnt1 down vs E11.5 * Ctrl |
| 10402730 | Ppp1r13b      | NM_011625    | 0.000424107  | -1.47011 | E11.5 * Wnt1 down vs E11.5 * Ctrl |
| 10556244 | Ipo7          | AF357383     | 0.00055863   | -1.47042 | E11.5 * Wnt1 down vs E11.5 * Ctrl |
| 10503315 | E130016E03Rik | NM_001039556 | 4.94424e-005 | -1.47183 | E11.5 * Wnt1 down vs E11.5 * Ctrl |
| 10400510 | Clec14a       | NM_025809    | 0.00392395   | -1.47231 | E11.5 * Wnt1 down vs E11.5 * Ctrl |
| 10519913 | Magi2         | NM_015823    | 0.00204149   | -1.47236 | E11.5 * Wnt1 down vs E11.5 * Ctrl |
| 10411226 | F2rl1         | NM_007974    | 0.00152728   | -1.47258 | E11.5 * Wnt1 down vs E11.5 * Ctrl |
| 10351482 | 1700015E13Rik | BC099563     | 4.17433e-005 | -1.4733  | E11.5 * Wnt1 down vs E11.5 * Ctrl |
| 10448836 | Tmem204       | NM_001001183 | 5.3575e-005  | -1.47334 | E11.5 * Wnt1 down vs E11.5 * Ctrl |
| 10377982 | Kif1c         | NM_153103    | 0.0038709    | -1.47359 | E11.5 * Wnt1 down vs E11.5 * Ctrl |
| 10461856 | Gna14         | NM_008137    | 0.00351217   | -1.47379 | E11.5 * Wnt1 down vs E11.5 * Ctrl |
| 10544815 | Hibadh        | NM_145567    | 0.000230389  | -1.47383 | E11.5 * Wnt1 down vs E11.5 * Ctrl |
| 10402409 | Serpina1e     | NM_009247    | 0.000792951  | -1.47407 | E11.5 * Wnt1 down vs E11.5 * Ctrl |
| 10462281 | Vldlr         | NM_013703    | 0.000495077  | -1.4742  | E11.5 * Wnt1 down vs E11.5 * Ctrl |
| 10485597 | Depdc7        | NM_144804    | 0.00250845   | -1.47522 | E11.5 * Wnt1 down vs E11.5 * Ctrl |
| 10406672 | Arsb          | NM_009712    | 0.000173983  | -1.47579 | E11.5 * Wnt1 down vs E11.5 * Ctrl |
| 10346564 | Casp8         | NM_009812    | 0.00169223   | -1.4758  | E11.5 * Wnt1 down vs E11.5 * Ctrl |
| 10555438 | Fchsd2        | NM_199012    | 2.38306e-007 | -1.47661 | E11.5 * Wnt1 down vs E11.5 * Ctrl |
| 10538547 | Fkbp9         | NM_012056    | 1.84964e-005 | -1.47694 | E11.5 * Wnt1 down vs E11.5 * Ctrl |
| 10366746 | Lrig3         | NM_177152    | 0.00247127   | -1.47704 | E11.5 * Wnt1 down vs E11.5 * Ctrl |
| 10389214 | Ccl9          | NM_011338    | 0.000233301  | -1.47731 | E11.5 * Wnt1 down vs E11.5 * Ctrl |

|                        |              |              |          |                                   |
|------------------------|--------------|--------------|----------|-----------------------------------|
| 10417167 Clybl         | NM_029556    | 0.000105709  | -1.47774 | E11.5 * Wnt1 down vs E11.5 * Ctrl |
| 10493449 Thbs3         | NM_013691    | 1.03967e-006 | -1.47808 | E11.5 * Wnt1 down vs E11.5 * Ctrl |
| 10359419               | ---          | 0.00718244   | -1.47874 | E11.5 * Wnt1 down vs E11.5 * Ctrl |
| 10361509 Syne1         | NM_001079686 | 6.40579e-006 | -1.47884 | E11.5 * Wnt1 down vs E11.5 * Ctrl |
| 10538848 OTTMUSG00000  | XR_032708    | 0.000210028  | -1.47946 | E11.5 * Wnt1 down vs E11.5 * Ctrl |
| 10544827               | ---          | 0.00111152   | -1.48072 | E11.5 * Wnt1 down vs E11.5 * Ctrl |
| 10493382 Pklr          | NM_013631    | 0.000134166  | -1.48153 | E11.5 * Wnt1 down vs E11.5 * Ctrl |
| 10352576 Esrrg         | NM_011935    | 0.000168612  | -1.48255 | E11.5 * Wnt1 down vs E11.5 * Ctrl |
| 10607924 Amelx         | NM_001081978 | 0.000167127  | -1.48292 | E11.5 * Wnt1 down vs E11.5 * Ctrl |
| 10413100 Myst4         | NM_017479    | 3.6745e-007  | -1.48424 | E11.5 * Wnt1 down vs E11.5 * Ctrl |
| 10437160 Ets2          | NM_011809    | 2.73686e-005 | -1.4845  | E11.5 * Wnt1 down vs E11.5 * Ctrl |
| 10361270 Cd46          | NM_010778    | 0.00432229   | -1.48525 | E11.5 * Wnt1 down vs E11.5 * Ctrl |
| 10416689 Olfm4         | NM_001030294 | 0.00159244   | -1.4856  | E11.5 * Wnt1 down vs E11.5 * Ctrl |
| 10381006 Thra          | NM_178060    | 0.000865602  | -1.48605 | E11.5 * Wnt1 down vs E11.5 * Ctrl |
| 10510129 Dhrrs3        | NM_011303    | 0.000581477  | -1.48649 | E11.5 * Wnt1 down vs E11.5 * Ctrl |
| 10354649 Pgap1         | ENSMUST00000 | 0.00300088   | -1.48656 | E11.5 * Wnt1 down vs E11.5 * Ctrl |
| 10477069 Tcf15         | NM_009328    | 0.000171354  | -1.48759 | E11.5 * Wnt1 down vs E11.5 * Ctrl |
| 10542181 Clec9a        | NM_172732    | 0.000724165  | -1.48818 | E11.5 * Wnt1 down vs E11.5 * Ctrl |
| 10486119 Plcb2         | NM_177568    | 0.000162016  | -1.48858 | E11.5 * Wnt1 down vs E11.5 * Ctrl |
| 10416653 Kbtbd7        | NM_001024135 | 0.00332759   | -1.48958 | E11.5 * Wnt1 down vs E11.5 * Ctrl |
| 10600093 Zfp185        | NM_009549    | 6.12611e-006 | -1.48993 | E11.5 * Wnt1 down vs E11.5 * Ctrl |
| 10391332 Ptrf          | NM_008986    | 6.98711e-005 | -1.49073 | E11.5 * Wnt1 down vs E11.5 * Ctrl |
| 10396950               | ---          | 0.000517681  | -1.49087 | E11.5 * Wnt1 down vs E11.5 * Ctrl |
| 10603417 Gata1         | NM_008089    | 2.10024e-006 | -1.49118 | E11.5 * Wnt1 down vs E11.5 * Ctrl |
| 10384486 Etaa1         | NM_026576    | 0.000472292  | -1.49215 | E11.5 * Wnt1 down vs E11.5 * Ctrl |
| 10479294               | ---          | 0.00165988   | -1.49228 | E11.5 * Wnt1 down vs E11.5 * Ctrl |
| 10419559 Rnase12       | NM_001011875 | 0.000385953  | -1.49295 | E11.5 * Wnt1 down vs E11.5 * Ctrl |
| 10482866 Tanc1         | NM_198294    | 3.19748e-005 | -1.49386 | E11.5 * Wnt1 down vs E11.5 * Ctrl |
| 10592816 Hmbs          | NM_013551    | 1.51207e-005 | -1.49514 | E11.5 * Wnt1 down vs E11.5 * Ctrl |
| 10385883 Slc22a21      | NM_019723    | 0.000866867  | -1.49604 | E11.5 * Wnt1 down vs E11.5 * Ctrl |
| 10501608 Vcam1         | NM_011693    | 0.000103616  | -1.4964  | E11.5 * Wnt1 down vs E11.5 * Ctrl |
| 10512919 Grin3a        | NM_001033351 | 3.35833e-005 | -1.4964  | E11.5 * Wnt1 down vs E11.5 * Ctrl |
| 10408861 9530008L14Rik | NM_175417    | 0.000228156  | -1.49646 | E11.5 * Wnt1 down vs E11.5 * Ctrl |
| 10484999 Ddb2          | NM_028119    | 2.00124e-006 | -1.4965  | E11.5 * Wnt1 down vs E11.5 * Ctrl |
| 10566934 Lyve1         | NM_053247    | 0.000438861  | -1.49701 | E11.5 * Wnt1 down vs E11.5 * Ctrl |
| 10577164 Gas6          | NM_019521    | 0.00204744   | -1.49757 | E11.5 * Wnt1 down vs E11.5 * Ctrl |
| 10453676               | ---          | 0.00095464   | -1.49836 | E11.5 * Wnt1 down vs E11.5 * Ctrl |
| 10406334 Mctp1         | NM_030174    | 1.87119e-006 | -1.49842 | E11.5 * Wnt1 down vs E11.5 * Ctrl |
| 10439710 Phldb2        | NM_153412    | 1.12104e-007 | -1.49872 | E11.5 * Wnt1 down vs E11.5 * Ctrl |
| 10448117 Has1          | NM_008215    | 0.000816981  | -1.49949 | E11.5 * Wnt1 down vs E11.5 * Ctrl |
| 10503376 OTTMUSG00000  | DQ351292     | 0.00258627   | -1.49949 | E11.5 * Wnt1 down vs E11.5 * Ctrl |
| 10432636 BC004728      | NM_174992    | 0.000391197  | -1.49974 | E11.5 * Wnt1 down vs E11.5 * Ctrl |
| 10380135               | ---          | 0.00126835   | -1.5003  | E11.5 * Wnt1 down vs E11.5 * Ctrl |
| 10573451 Syce2         | NM_027954    | 9.57833e-008 | -1.50034 | E11.5 * Wnt1 down vs E11.5 * Ctrl |
| 10472970 Hoxd4         | NM_010469    | 7.15931e-005 | -1.50069 | E11.5 * Wnt1 down vs E11.5 * Ctrl |
| 10587659 EG547109      | NM_001034906 | 0.00195208   | -1.50085 | E11.5 * Wnt1 down vs E11.5 * Ctrl |
| 10370037 Mmp11         | NM_008606    | 0.000396749  | -1.50168 | E11.5 * Wnt1 down vs E11.5 * Ctrl |
| 10542470 Mgst1         | NM_019946    | 0.00117386   | -1.50169 | E11.5 * Wnt1 down vs E11.5 * Ctrl |
| 10500272 Gm129         | NM_001033302 | 0.00353618   | -1.50199 | E11.5 * Wnt1 down vs E11.5 * Ctrl |
| 10498379               | ---          | 0.00159749   | -1.50203 | E11.5 * Wnt1 down vs E11.5 * Ctrl |
| 10584589               | ---          | 0.00034333   | -1.50269 | E11.5 * Wnt1 down vs E11.5 * Ctrl |
| 10470283 Egfl7         | NM_198724    | 4.6885e-005  | -1.50274 | E11.5 * Wnt1 down vs E11.5 * Ctrl |
| 10410756 Ankrd32       | NM_134071    | 0.00108168   | -1.50302 | E11.5 * Wnt1 down vs E11.5 * Ctrl |
| 10598004 Ccr1          | NM_009912    | 0.000881545  | -1.50381 | E11.5 * Wnt1 down vs E11.5 * Ctrl |
| 10579812 Ednra         | NM_010332    | 7.52346e-005 | -1.5043  | E11.5 * Wnt1 down vs E11.5 * Ctrl |
| 10575976 Crisp1d2      | NM_030209    | 0.000196231  | -1.50463 | E11.5 * Wnt1 down vs E11.5 * Ctrl |
| 10443027 A930001N09Rik | NM_029870    | 1.05297e-005 | -1.50631 | E11.5 * Wnt1 down vs E11.5 * Ctrl |
| 10369750 ENSMUSG00000  | ENSMUST00000 | 0.0077216    | -1.5064  | E11.5 * Wnt1 down vs E11.5 * Ctrl |
| 10354418 Obfc2a        | NM_028696    | 0.00211077   | -1.5071  | E11.5 * Wnt1 down vs E11.5 * Ctrl |
| 10410973               | ---          | 1.74136e-005 | -1.50767 | E11.5 * Wnt1 down vs E11.5 * Ctrl |
| 10372139 Nts           | NM_024435    | 0.000323752  | -1.50799 | E11.5 * Wnt1 down vs E11.5 * Ctrl |
| 10535841 Slc46a3       | NM_027872    | 0.0025431    | -1.50851 | E11.5 * Wnt1 down vs E11.5 * Ctrl |
| 10530145 Tlr1          | NM_030682    | 0.00202636   | -1.5091  | E11.5 * Wnt1 down vs E11.5 * Ctrl |
| 10498383 Igsf10        | ENSMUST00000 | 0.000607003  | -1.50951 | E11.5 * Wnt1 down vs E11.5 * Ctrl |
| 10547769 Ptpn6         | NM_013545    | 8.54429e-006 | -1.51007 | E11.5 * Wnt1 down vs E11.5 * Ctrl |
| 10420216 Sdr39u1       | NM_001082975 | 0.00108126   | -1.51053 | E11.5 * Wnt1 down vs E11.5 * Ctrl |

|          |               |               |              |          |                                   |
|----------|---------------|---------------|--------------|----------|-----------------------------------|
| 10508663 | Lapm5         | NM_010686     | 0.00546738   | -1.51061 | E11.5 * Wnt1 down vs E11.5 * Ctrl |
| 10542164 | Clec12a       | NM_177686     | 0.000186383  | -1.51112 | E11.5 * Wnt1 down vs E11.5 * Ctrl |
| 10367945 | Phactr2       | NM_001033257  | 0.00220877   | -1.51163 | E11.5 * Wnt1 down vs E11.5 * Ctrl |
| 10588786 | Ube1l         | NM_023738     | 3.54446e-005 | -1.51245 | E11.5 * Wnt1 down vs E11.5 * Ctrl |
| 10402606 | Rtl1          | NM_184109     | 4.79044e-005 | -1.5126  | E11.5 * Wnt1 down vs E11.5 * Ctrl |
| 10428511 | Csmd3         | NM_001081391  | 0.00217016   | -1.51292 | E11.5 * Wnt1 down vs E11.5 * Ctrl |
| 10544002 | Creb3l2       | NM_178661     | 3.00384e-006 | -1.51349 | E11.5 * Wnt1 down vs E11.5 * Ctrl |
| 10492402 | Kcnab1        | NM_010597     | 2.09191e-005 | -1.51374 | E11.5 * Wnt1 down vs E11.5 * Ctrl |
| 10604956 | ---           | ---           | 0.000401801  | -1.51396 | E11.5 * Wnt1 down vs E11.5 * Ctrl |
| 10604542 | Hs6st2        | NM_001077202  | 2.42605e-005 | -1.51511 | E11.5 * Wnt1 down vs E11.5 * Ctrl |
| 10409282 | Ror2          | NM_013846     | 6.26809e-005 | -1.51564 | E11.5 * Wnt1 down vs E11.5 * Ctrl |
| 10362615 | Traf3ip2      | NM_134000     | 8.59725e-006 | -1.51627 | E11.5 * Wnt1 down vs E11.5 * Ctrl |
| 10549282 | Itpr2         | NM_019923     | 8.04744e-007 | -1.51735 | E11.5 * Wnt1 down vs E11.5 * Ctrl |
| 10409994 | EG435366      | ENSMUST000001 | 0.00283557   | -1.51821 | E11.5 * Wnt1 down vs E11.5 * Ctrl |
| 10447848 | Mas1          | NM_008552     | 0.000477846  | -1.5198  | E11.5 * Wnt1 down vs E11.5 * Ctrl |
| 10419156 | Ear10         | NM_053112     | 8.94533e-005 | -1.51996 | E11.5 * Wnt1 down vs E11.5 * Ctrl |
| 10390299 | Pnp0          | NM_134021     | 0.000155898  | -1.52009 | E11.5 * Wnt1 down vs E11.5 * Ctrl |
| 10482301 | A930041I02Rik | NM_178778     | 5.66758e-005 | -1.5207  | E11.5 * Wnt1 down vs E11.5 * Ctrl |
| 10458661 | ---           | ---           | 2.59972e-005 | -1.52077 | E11.5 * Wnt1 down vs E11.5 * Ctrl |
| 10395869 | 4921506M07Rik | BC100489      | 0.00601348   | -1.52186 | E11.5 * Wnt1 down vs E11.5 * Ctrl |
| 10385500 | Irgm1         | NM_008326     | 7.24057e-005 | -1.52544 | E11.5 * Wnt1 down vs E11.5 * Ctrl |
| 10523727 | Pkd2          | NM_008861     | 1.51539e-006 | -1.52583 | E11.5 * Wnt1 down vs E11.5 * Ctrl |
| 10439268 | Dtx3l         | NM_001013371  | 0.000378185  | -1.52645 | E11.5 * Wnt1 down vs E11.5 * Ctrl |
| 10452980 | Eif2ak2       | NM_011163     | 0.00100292   | -1.52661 | E11.5 * Wnt1 down vs E11.5 * Ctrl |
| 10584325 | Vsig2         | NM_020518     | 2.04574e-005 | -1.52663 | E11.5 * Wnt1 down vs E11.5 * Ctrl |
| 10380419 | Col1a1        | NM_007742     | 3.49493e-007 | -1.52688 | E11.5 * Wnt1 down vs E11.5 * Ctrl |
| 10357137 | Gli2          | NM_001081125  | 7.16883e-005 | -1.52722 | E11.5 * Wnt1 down vs E11.5 * Ctrl |
| 10531610 | Rasgef1b      | NM_145839     | 0.00140986   | -1.52737 | E11.5 * Wnt1 down vs E11.5 * Ctrl |
| 10576911 | Efnb2         | NM_010111     | 0.000102057  | -1.52792 | E11.5 * Wnt1 down vs E11.5 * Ctrl |
| 10366196 | Ppfia2        | NM_177373     | 2.95753e-005 | -1.52836 | E11.5 * Wnt1 down vs E11.5 * Ctrl |
| 10401149 | Plek2         | NM_013738     | 0.000127925  | -1.52871 | E11.5 * Wnt1 down vs E11.5 * Ctrl |
| 10380629 | Hoxb8         | NM_010461     | 2.83742e-005 | -1.52905 | E11.5 * Wnt1 down vs E11.5 * Ctrl |
| 10362811 | Sesn1         | NM_001013370  | 1.23629e-005 | -1.5292  | E11.5 * Wnt1 down vs E11.5 * Ctrl |
| 10359970 | Nos1ap        | NM_001109985  | 2.42663e-005 | -1.52925 | E11.5 * Wnt1 down vs E11.5 * Ctrl |
| 10590686 | Ddi1          | NM_027942     | 0.00139247   | -1.53071 | E11.5 * Wnt1 down vs E11.5 * Ctrl |
| 10554156 | Fam174b       | ENSMUST000002 | 2.49396e-005 | -1.53181 | E11.5 * Wnt1 down vs E11.5 * Ctrl |
| 10562651 | C330019L16Rik | NM_001034857  | 0.00269741   | -1.53277 | E11.5 * Wnt1 down vs E11.5 * Ctrl |
| 10382435 | Gprc5c        | NM_001110337  | 3.03193e-005 | -1.53304 | E11.5 * Wnt1 down vs E11.5 * Ctrl |
| 10490777 | Zfhx4         | NM_030708     | 1.08447e-006 | -1.53362 | E11.5 * Wnt1 down vs E11.5 * Ctrl |
| 10379511 | Ccl2          | NM_011333     | 5.56291e-006 | -1.53365 | E11.5 * Wnt1 down vs E11.5 * Ctrl |
| 10420747 | Gata4         | NM_008092     | 9.23571e-005 | -1.53461 | E11.5 * Wnt1 down vs E11.5 * Ctrl |
| 10398907 | Pld4          | NM_178911     | 3.11375e-005 | -1.53472 | E11.5 * Wnt1 down vs E11.5 * Ctrl |
| 10385872 | Slc22a5       | NM_011396     | 0.000250133  | -1.53526 | E11.5 * Wnt1 down vs E11.5 * Ctrl |
| 10598586 | Xk            | NM_023500     | 7.86195e-005 | -1.5355  | E11.5 * Wnt1 down vs E11.5 * Ctrl |
| 10347291 | Il8rb         | NM_009909     | 0.000322073  | -1.53588 | E11.5 * Wnt1 down vs E11.5 * Ctrl |
| 10497337 | Car1          | NM_009799     | 0.00152124   | -1.53591 | E11.5 * Wnt1 down vs E11.5 * Ctrl |
| 10503241 | Gdf6          | NM_013526     | 0.00243062   | -1.53607 | E11.5 * Wnt1 down vs E11.5 * Ctrl |
| 10369132 | Fam184a       | NM_001081428  | 3.01151e-006 | -1.53662 | E11.5 * Wnt1 down vs E11.5 * Ctrl |
| 10362138 | Vnn1          | NM_011704     | 0.000289298  | -1.53664 | E11.5 * Wnt1 down vs E11.5 * Ctrl |
| 10436519 | Robo1         | NM_019413     | 3.83214e-006 | -1.53787 | E11.5 * Wnt1 down vs E11.5 * Ctrl |
| 10435841 | Ccdc52        | NM_144550     | 7.91542e-005 | -1.53816 | E11.5 * Wnt1 down vs E11.5 * Ctrl |
| 10553450 | Nell1         | NM_001037906  | 0.00101461   | -1.5393  | E11.5 * Wnt1 down vs E11.5 * Ctrl |
| 10576581 | Kcnk1         | NM_008430     | 0.00110758   | -1.53954 | E11.5 * Wnt1 down vs E11.5 * Ctrl |
| 10519484 | Steap2        | AK141701      | 0.00176918   | -1.53984 | E11.5 * Wnt1 down vs E11.5 * Ctrl |
| 10405733 | EG630579      | NM_001039239  | 0.000815488  | -1.5399  | E11.5 * Wnt1 down vs E11.5 * Ctrl |
| 10514421 | Lrrc19        | NM_175305     | 0.00073617   | -1.53993 | E11.5 * Wnt1 down vs E11.5 * Ctrl |
| 10526693 | Zcwpw1        | NM_001005426  | 0.000836237  | -1.54026 | E11.5 * Wnt1 down vs E11.5 * Ctrl |
| 10396778 | Mpp5          | NM_019579     | 9.98821e-007 | -1.54076 | E11.5 * Wnt1 down vs E11.5 * Ctrl |
| 10591164 | ---           | ---           | 0.00102333   | -1.54116 | E11.5 * Wnt1 down vs E11.5 * Ctrl |
| 10463911 | Add3          | NM_013758     | 1.15387e-005 | -1.54137 | E11.5 * Wnt1 down vs E11.5 * Ctrl |
| 10463404 | Fam178a       | NM_001081225  | 2.07638e-007 | -1.54161 | E11.5 * Wnt1 down vs E11.5 * Ctrl |
| 10407097 | Pde4d         | NM_011056     | 4.32807e-009 | -1.54172 | E11.5 * Wnt1 down vs E11.5 * Ctrl |
| 10583870 | Bmper         | NM_028472     | 2.28276e-005 | -1.54255 | E11.5 * Wnt1 down vs E11.5 * Ctrl |
| 10447799 | Igf2r         | NM_010515     | 4.01665e-008 | -1.54364 | E11.5 * Wnt1 down vs E11.5 * Ctrl |
| 10554800 | Rab38         | NM_028238     | 6.81368e-008 | -1.54376 | E11.5 * Wnt1 down vs E11.5 * Ctrl |
| 10472846 | Pdk1          | NM_172665     | 0.00624819   | -1.5442  | E11.5 * Wnt1 down vs E11.5 * Ctrl |

|          |               |               |              |          |                                   |
|----------|---------------|---------------|--------------|----------|-----------------------------------|
| 10541564 | Clec4a3       | NM_153197     | 0.000206705  | -1.54484 | E11.5 * Wnt1 down vs E11.5 * Ctrl |
| 10575052 | Cdh1          | NM_009864     | 0.00191726   | -1.54498 | E11.5 * Wnt1 down vs E11.5 * Ctrl |
| 10428124 | Rgs22         | ENSMUST000000 | 0.000204188  | -1.54539 | E11.5 * Wnt1 down vs E11.5 * Ctrl |
| 10594840 | Gcom1         | NM_001033208  | 0.000177276  | -1.54554 | E11.5 * Wnt1 down vs E11.5 * Ctrl |
| 10443949 | Adamts10      | NM_172619     | 0.000218484  | -1.54585 | E11.5 * Wnt1 down vs E11.5 * Ctrl |
| 10363070 | Gp49a         | NM_008147     | 0.00112074   | -1.54588 | E11.5 * Wnt1 down vs E11.5 * Ctrl |
| 10472240 | Tanc1         | NM_198294     | 5.53324e-007 | -1.54591 | E11.5 * Wnt1 down vs E11.5 * Ctrl |
| 10527940 | Pftk1         | NM_011074     | 2.05505e-005 | -1.54612 | E11.5 * Wnt1 down vs E11.5 * Ctrl |
| 10492957 | Cd1d2         | NM_007640     | 1.00396e-005 | -1.54643 | E11.5 * Wnt1 down vs E11.5 * Ctrl |
| 10519815 | Cacna2d1      | NM_001110843  | 0.000106921  | -1.54702 | E11.5 * Wnt1 down vs E11.5 * Ctrl |
| 10365991 | Epyc          | NM_007884     | 6.37445e-005 | -1.54729 | E11.5 * Wnt1 down vs E11.5 * Ctrl |
| 10398326 | Meg3          | NR_003633     | 0.000627204  | -1.54794 | E11.5 * Wnt1 down vs E11.5 * Ctrl |
| 10397575 | Nrxn3         | NM_172544     | 3.15866e-005 | -1.54873 | E11.5 * Wnt1 down vs E11.5 * Ctrl |
| 10456329 | 5330437I02Rik | NM_177028     | 0.000181705  | -1.54905 | E11.5 * Wnt1 down vs E11.5 * Ctrl |
| 10460968 | Rasgrp2       | NM_011242     | 1.24286e-006 | -1.55005 | E11.5 * Wnt1 down vs E11.5 * Ctrl |
| 10354647 | Pgap1         | ENSMUST000000 | 0.000707439  | -1.55043 | E11.5 * Wnt1 down vs E11.5 * Ctrl |
| 10475532 | Sqrdl         | NM_021507     | 0.00468206   | -1.55094 | E11.5 * Wnt1 down vs E11.5 * Ctrl |
| 10578829 | Palld         | NM_001081390  | 0.00183677   | -1.55425 | E11.5 * Wnt1 down vs E11.5 * Ctrl |
| 10534679 | Trim56        | NM_201373     | 0.00450526   | -1.55461 | E11.5 * Wnt1 down vs E11.5 * Ctrl |
| 10584334 | Siae          | NM_011734     | 0.000557194  | -1.55499 | E11.5 * Wnt1 down vs E11.5 * Ctrl |
| 10471929 | Arhgap15      | NM_153820     | 0.00153734   | -1.55519 | E11.5 * Wnt1 down vs E11.5 * Ctrl |
| 10469505 | Comm3         | NM_147778     | 0.000129199  | -1.55566 | E11.5 * Wnt1 down vs E11.5 * Ctrl |
| 10403871 | Aoah          | NM_012054     | 3.65195e-005 | -1.55585 | E11.5 * Wnt1 down vs E11.5 * Ctrl |
| 10409059 | ---           | ---           | 0.000416922  | -1.55587 | E11.5 * Wnt1 down vs E11.5 * Ctrl |
| 10560618 | Apoc1         | NM_007469     | 0.000178525  | -1.55617 | E11.5 * Wnt1 down vs E11.5 * Ctrl |
| 10423024 | Capsl         | NM_029341     | 0.000676221  | -1.55638 | E11.5 * Wnt1 down vs E11.5 * Ctrl |
| 10440344 | Robo2         | NM_175549     | 0.000199149  | -1.55678 | E11.5 * Wnt1 down vs E11.5 * Ctrl |
| 10441093 | Erg           | NM_133659     | 7.84795e-007 | -1.55693 | E11.5 * Wnt1 down vs E11.5 * Ctrl |
| 10397633 | Flrt2         | NM_201518     | 0.00012585   | -1.55753 | E11.5 * Wnt1 down vs E11.5 * Ctrl |
| 10439612 | Boc           | NM_172506     | 5.45269e-006 | -1.55799 | E11.5 * Wnt1 down vs E11.5 * Ctrl |
| 10394860 | B230354O11Rik | AK046228      | 0.00179028   | -1.55824 | E11.5 * Wnt1 down vs E11.5 * Ctrl |
| 10546452 | Adamts9       | NM_175314     | 4.11507e-007 | -1.55871 | E11.5 * Wnt1 down vs E11.5 * Ctrl |
| 10499113 | Gm1019        | NM_001001650  | 7.07003e-006 | -1.55889 | E11.5 * Wnt1 down vs E11.5 * Ctrl |
| 10436196 | ---           | ---           | 6.79553e-005 | -1.55894 | E11.5 * Wnt1 down vs E11.5 * Ctrl |
| 10398428 | ---           | ---           | 7.34049e-005 | -1.55935 | E11.5 * Wnt1 down vs E11.5 * Ctrl |
| 10550388 | Gng8          | NM_010320     | 0.00146605   | -1.55946 | E11.5 * Wnt1 down vs E11.5 * Ctrl |
| 10497051 | Negr1         | NM_001039094  | 0.000775166  | -1.55999 | E11.5 * Wnt1 down vs E11.5 * Ctrl |
| 10538706 | Mmrn1         | BC137623      | 0.00332202   | -1.56007 | E11.5 * Wnt1 down vs E11.5 * Ctrl |
| 10354588 | Stk17b        | NM_133810     | 0.00297049   | -1.56106 | E11.5 * Wnt1 down vs E11.5 * Ctrl |
| 10538802 | A930038C07Rik | NM_172399     | 0.000606058  | -1.56109 | E11.5 * Wnt1 down vs E11.5 * Ctrl |
| 10368373 | C030003D03Rik | NM_029881     | 0.000100395  | -1.56218 | E11.5 * Wnt1 down vs E11.5 * Ctrl |
| 10531185 | Adamts3       | NM_001081401  | 2.59172e-005 | -1.56271 | E11.5 * Wnt1 down vs E11.5 * Ctrl |
| 10376245 | Gria1         | NM_001113325  | 1.51719e-006 | -1.56285 | E11.5 * Wnt1 down vs E11.5 * Ctrl |
| 10457077 | Fbxo15        | NM_015798     | 0.00095521   | -1.56311 | E11.5 * Wnt1 down vs E11.5 * Ctrl |
| 10547100 | Plxnd1        | NM_026376     | 0.000537218  | -1.56352 | E11.5 * Wnt1 down vs E11.5 * Ctrl |
| 10366546 | Cpm           | NM_027468     | 0.000617352  | -1.56356 | E11.5 * Wnt1 down vs E11.5 * Ctrl |
| 10559558 | Tnni3         | NM_009406     | 7.75227e-006 | -1.5644  | E11.5 * Wnt1 down vs E11.5 * Ctrl |
| 10483110 | Ifih1         | NM_027835     | 5.85663e-005 | -1.56472 | E11.5 * Wnt1 down vs E11.5 * Ctrl |
| 10397975 | Ifi271        | NM_026790     | 3.81865e-005 | -1.56585 | E11.5 * Wnt1 down vs E11.5 * Ctrl |
| 10442069 | Lix1          | NM_025681     | 0.00405791   | -1.56587 | E11.5 * Wnt1 down vs E11.5 * Ctrl |
| 10607943 | ---           | ---           | 0.000171606  | -1.56613 | E11.5 * Wnt1 down vs E11.5 * Ctrl |
| 10369702 | Tet1          | ENSMUST000000 | 2.88837e-006 | -1.56662 | E11.5 * Wnt1 down vs E11.5 * Ctrl |
| 10424543 | Wisp1         | NM_018865     | 0.000314275  | -1.56665 | E11.5 * Wnt1 down vs E11.5 * Ctrl |
| 10546010 | Arhgap25      | NM_001037727  | 0.00152368   | -1.56694 | E11.5 * Wnt1 down vs E11.5 * Ctrl |
| 10466530 | Pcsk5         | BC013068      | 1.08678e-005 | -1.56739 | E11.5 * Wnt1 down vs E11.5 * Ctrl |
| 10514219 | Scarna8       | AF357402      | 0.00300548   | -1.56766 | E11.5 * Wnt1 down vs E11.5 * Ctrl |
| 10584317 | Esam          | NM_027102     | 5.84831e-005 | -1.56791 | E11.5 * Wnt1 down vs E11.5 * Ctrl |
| 10520612 | Khk           | NM_008439     | 0.000150486  | -1.56831 | E11.5 * Wnt1 down vs E11.5 * Ctrl |
| 10371379 | Nuak1         | NM_001004363  | 8.95933e-005 | -1.56836 | E11.5 * Wnt1 down vs E11.5 * Ctrl |
| 10462140 | Dock8         | NM_028785     | 0.000386135  | -1.56913 | E11.5 * Wnt1 down vs E11.5 * Ctrl |
| 10513208 | Svep1         | NM_022814     | 3.67033e-006 | -1.56997 | E11.5 * Wnt1 down vs E11.5 * Ctrl |
| 10352448 | Dusp10        | NM_022019     | 0.000184919  | -1.57017 | E11.5 * Wnt1 down vs E11.5 * Ctrl |
| 10454601 | Tslp          | NM_021367     | 1.5979e-005  | -1.57023 | E11.5 * Wnt1 down vs E11.5 * Ctrl |
| 10463410 | Fam178a       | NM_001081225  | 0.000147303  | -1.57068 | E11.5 * Wnt1 down vs E11.5 * Ctrl |
| 10454192 | Ttr           | NM_013697     | 0.00209126   | -1.57148 | E11.5 * Wnt1 down vs E11.5 * Ctrl |
| 10409978 | EG630579      | NM_001039239  | 0.000317185  | -1.57237 | E11.5 * Wnt1 down vs E11.5 * Ctrl |

|          |               |              |              |          |                                   |
|----------|---------------|--------------|--------------|----------|-----------------------------------|
| 10431749 | Adamts20      | NM_177431    | 3.23289e-005 | -1.57435 | E11.5 * Wnt1 down vs E11.5 * Ctrl |
| 10375360 | Ebf1          | NM_007897    | 0.00246342   | -1.57475 | E11.5 * Wnt1 down vs E11.5 * Ctrl |
| 10467068 | Sgms1         | NM_144792    | 1.917e-005   | -1.57566 | E11.5 * Wnt1 down vs E11.5 * Ctrl |
| 10495206 | Slc16a4       | NM_146136    | 6.46347e-007 | -1.5762  | E11.5 * Wnt1 down vs E11.5 * Ctrl |
| 10425066 | Csf2rb        | NM_007780    | 5.26259e-005 | -1.57625 | E11.5 * Wnt1 down vs E11.5 * Ctrl |
| 10404059 | Hist1h1c      | NM_015786    | 0.000114438  | -1.57666 | E11.5 * Wnt1 down vs E11.5 * Ctrl |
| 10607486 | Ptchd1        | NM_001093750 | 3.11222e-007 | -1.57765 | E11.5 * Wnt1 down vs E11.5 * Ctrl |
| 10408812 | Mak           | NM_001145803 | 0.000409705  | -1.57836 | E11.5 * Wnt1 down vs E11.5 * Ctrl |
| 10463476 | Kazald1       | NM_178929    | 0.0001856    | -1.57893 | E11.5 * Wnt1 down vs E11.5 * Ctrl |
| 10563085 | Fcgrt         | NM_010189    | 7.24711e-008 | -1.57919 | E11.5 * Wnt1 down vs E11.5 * Ctrl |
| 10388902 | Lgals9        | NM_010708    | 2.46392e-005 | -1.57939 | E11.5 * Wnt1 down vs E11.5 * Ctrl |
| 10407591 | Chrm3         | NM_033269    | 0.000423273  | -1.57943 | E11.5 * Wnt1 down vs E11.5 * Ctrl |
| 10400483 | Slc25a21      | NM_172577    | 1.51085e-005 | -1.57999 | E11.5 * Wnt1 down vs E11.5 * Ctrl |
| 10437236 | B230307C23Rik | ENSMUST00000 | 0.00618109   | -1.58045 | E11.5 * Wnt1 down vs E11.5 * Ctrl |
| 10404885 | Gmpr          | NM_025508    | 7.71925e-007 | -1.58078 | E11.5 * Wnt1 down vs E11.5 * Ctrl |
| 10430993 | 1700001L05Rik | ENSMUST00000 | 0.000579907  | -1.58113 | E11.5 * Wnt1 down vs E11.5 * Ctrl |
| 10553788 | Atp10a        | NM_009728    | 3.88827e-007 | -1.58238 | E11.5 * Wnt1 down vs E11.5 * Ctrl |
| 10604564 | Gpc4          | NM_008150    | 0.00011125   | -1.58269 | E11.5 * Wnt1 down vs E11.5 * Ctrl |
| 10501222 | Gstm2         | NM_008183    | 0.000933598  | -1.58321 | E11.5 * Wnt1 down vs E11.5 * Ctrl |
| 10584208 | Cdon          | NM_021339    | 9.37183e-008 | -1.58335 | E11.5 * Wnt1 down vs E11.5 * Ctrl |
| 10542993 | Pon3          | NM_173006    | 4.32466e-006 | -1.58508 | E11.5 * Wnt1 down vs E11.5 * Ctrl |
| 10515981 | ---           | ---          | 0.00468238   | -1.58576 | E11.5 * Wnt1 down vs E11.5 * Ctrl |
| 10495830 | Sec24d        | NM_027135    | 4.91038e-005 | -1.58602 | E11.5 * Wnt1 down vs E11.5 * Ctrl |
| 10530692 | Kdr           | NM_010612    | 4.25898e-005 | -1.58652 | E11.5 * Wnt1 down vs E11.5 * Ctrl |
| 10363860 | Slc16a9       | NM_025807    | 0.000952778  | -1.58746 | E11.5 * Wnt1 down vs E11.5 * Ctrl |
| 10606658 | Trmt2b        | NM_172540    | 0.00081081   | -1.58763 | E11.5 * Wnt1 down vs E11.5 * Ctrl |
| 10496251 | Bdh2          | NM_027208    | 1.78455e-005 | -1.58924 | E11.5 * Wnt1 down vs E11.5 * Ctrl |
| 10601270 | ENSMUSG0000C  | ENSMUST00000 | 0.000186424  | -1.58934 | E11.5 * Wnt1 down vs E11.5 * Ctrl |
| 10497381 | Cyp7b1        | NM_007825    | 1.30905e-005 | -1.58952 | E11.5 * Wnt1 down vs E11.5 * Ctrl |
| 10358389 | Rgs2          | NM_009061    | 0.000115849  | -1.59023 | E11.5 * Wnt1 down vs E11.5 * Ctrl |
| 10401607 | Pgf           | NM_008827    | 0.000586654  | -1.59059 | E11.5 * Wnt1 down vs E11.5 * Ctrl |
| 10455108 | Pcdhb16       | NM_053141    | 0.00724824   | -1.59087 | E11.5 * Wnt1 down vs E11.5 * Ctrl |
| 10576051 | Foxc2         | NM_013519    | 0.00767316   | -1.59145 | E11.5 * Wnt1 down vs E11.5 * Ctrl |
| 10561212 | Ltbp4         | NM_175641    | 3.71148e-005 | -1.59155 | E11.5 * Wnt1 down vs E11.5 * Ctrl |
| 10361790 | Fuca2         | NM_025799    | 4.51152e-005 | -1.59172 | E11.5 * Wnt1 down vs E11.5 * Ctrl |
| 10517517 | C1qa          | NM_007572    | 2.29305e-005 | -1.59254 | E11.5 * Wnt1 down vs E11.5 * Ctrl |
| 10554521 | Pde8a         | NM_008803    | 0.000108355  | -1.59268 | E11.5 * Wnt1 down vs E11.5 * Ctrl |
| 10571530 | Fat1          | NM_001081286 | 3.76774e-007 | -1.59297 | E11.5 * Wnt1 down vs E11.5 * Ctrl |
| 10416230 | Tnfrsf10b     | NM_020275    | 0.00228933   | -1.59365 | E11.5 * Wnt1 down vs E11.5 * Ctrl |
| 10496182 | Cxxc4         | NM_001004367 | 5.12986e-006 | -1.5942  | E11.5 * Wnt1 down vs E11.5 * Ctrl |
| 10535936 | ---           | ---          | 0.000577977  | -1.59462 | E11.5 * Wnt1 down vs E11.5 * Ctrl |
| 10455071 | Pcdhb7        | NM_053132    | 0.000664682  | -1.5948  | E11.5 * Wnt1 down vs E11.5 * Ctrl |
| 10600326 | Tktl1         | NM_031379    | 0.00364494   | -1.59513 | E11.5 * Wnt1 down vs E11.5 * Ctrl |
| 10474419 | Lgr4          | NM_172671    | 4.17357e-005 | -1.5954  | E11.5 * Wnt1 down vs E11.5 * Ctrl |
| 10519811 | Speer8-ps1    | NR_001584    | 4.28302e-005 | -1.59587 | E11.5 * Wnt1 down vs E11.5 * Ctrl |
| 10362968 | Bves          | NM_024285    | 7.78412e-006 | -1.59647 | E11.5 * Wnt1 down vs E11.5 * Ctrl |
| 10584315 | ---           | ---          | 0.00776653   | -1.59731 | E11.5 * Wnt1 down vs E11.5 * Ctrl |
| 10404294 | Prl3b1        | NM_008865    | 1.61156e-006 | -1.59738 | E11.5 * Wnt1 down vs E11.5 * Ctrl |
| 10406598 | Serinc5       | NM_172588    | 0.00124531   | -1.59848 | E11.5 * Wnt1 down vs E11.5 * Ctrl |
| 10591114 | Fat3          | NM_001080814 | 0.0026465    | -1.59945 | E11.5 * Wnt1 down vs E11.5 * Ctrl |
| 10505717 | Adamts1       | NM_029967    | 0.000628354  | -1.59947 | E11.5 * Wnt1 down vs E11.5 * Ctrl |
| 10404982 | Barx1         | NM_007526    | 0.000813521  | -1.60075 | E11.5 * Wnt1 down vs E11.5 * Ctrl |
| 10366266 | Pawr          | NM_054056    | 0.00283412   | -1.60116 | E11.5 * Wnt1 down vs E11.5 * Ctrl |
| 10470562 | ENSMUSG0000C  | ENSMUST00000 | 0.00154291   | -1.6017  | E11.5 * Wnt1 down vs E11.5 * Ctrl |
| 10479397 | Ntsr1         | NM_018766    | 0.000610734  | -1.60252 | E11.5 * Wnt1 down vs E11.5 * Ctrl |
| 10531189 | Adamts3       | NM_001081401 | 0.000996739  | -1.60284 | E11.5 * Wnt1 down vs E11.5 * Ctrl |
| 10463875 | Sorcs3        | NM_025696    | 4.33728e-005 | -1.60337 | E11.5 * Wnt1 down vs E11.5 * Ctrl |
| 10554969 | Odz4          | NM_011858    | 8.4867e-005  | -1.60342 | E11.5 * Wnt1 down vs E11.5 * Ctrl |
| 10565759 | Uvrag         | NM_178635    | 0.000777914  | -1.60422 | E11.5 * Wnt1 down vs E11.5 * Ctrl |
| 10566366 | Al451617      | NM_199146    | 0.00238242   | -1.60434 | E11.5 * Wnt1 down vs E11.5 * Ctrl |
| 10466248 | Stx3          | NM_001025307 | 5.50408e-006 | -1.6059  | E11.5 * Wnt1 down vs E11.5 * Ctrl |
| 10363090 | Rfx6          | NM_001159389 | 1.5173e-005  | -1.60676 | E11.5 * Wnt1 down vs E11.5 * Ctrl |
| 10353731 | 4930444G20Rik | NM_053264    | 0.00558089   | -1.60723 | E11.5 * Wnt1 down vs E11.5 * Ctrl |
| 10477717 | Procr         | NM_011171    | 0.000322461  | -1.60841 | E11.5 * Wnt1 down vs E11.5 * Ctrl |
| 10422496 | Gpr183        | NM_183031    | 1.37228e-005 | -1.60862 | E11.5 * Wnt1 down vs E11.5 * Ctrl |
| 10604944 | Gabre         | NM_017369    | 0.000211514  | -1.60878 | E11.5 * Wnt1 down vs E11.5 * Ctrl |

|          |               |              |              |          |                                   |
|----------|---------------|--------------|--------------|----------|-----------------------------------|
| 10423109 | Adamts12      | NM_175501    | 3.0762e-007  | -1.60917 | E11.5 * Wnt1 down vs E11.5 * Ctrl |
| 10599598 | A630012P03Rik | ENSMUST00000 | 2.69445e-005 | -1.60951 | E11.5 * Wnt1 down vs E11.5 * Ctrl |
| 10458875 | Dtwd2         | NM_026854    | 0.00285952   | -1.61164 | E11.5 * Wnt1 down vs E11.5 * Ctrl |
| 10424082 | Aard          | NM_175503    | 0.000290133  | -1.612   | E11.5 * Wnt1 down vs E11.5 * Ctrl |
| 10407598 | Ryr2          | NM_023868    | 4.24317e-008 | -1.61292 | E11.5 * Wnt1 down vs E11.5 * Ctrl |
| 10554574 | Tm6sf1        | NM_145375    | 0.00168608   | -1.61295 | E11.5 * Wnt1 down vs E11.5 * Ctrl |
| 10555862 | Trim34        | NM_030684    | 7.35452e-005 | -1.61424 | E11.5 * Wnt1 down vs E11.5 * Ctrl |
| 10544801 | Hoxa11        | NM_010450    | 2.21965e-005 | -1.61457 | E11.5 * Wnt1 down vs E11.5 * Ctrl |
| 10459288 | Adrb2         | NM_007420    | 0.000575139  | -1.61479 | E11.5 * Wnt1 down vs E11.5 * Ctrl |
| 10443786 | Pde9a         | NM_008804    | 2.32048e-006 | -1.61491 | E11.5 * Wnt1 down vs E11.5 * Ctrl |
| 10453811 | AK220484      | NM_001083628 | 6.21339e-005 | -1.61495 | E11.5 * Wnt1 down vs E11.5 * Ctrl |
| 10422013 | Klf12         | NM_010636    | 4.37814e-005 | -1.61556 | E11.5 * Wnt1 down vs E11.5 * Ctrl |
| 10430372 | Rac2          | NM_009008    | 1.22221e-006 | -1.6166  | E11.5 * Wnt1 down vs E11.5 * Ctrl |
| 10564237 | ENSMUSG00000  | ENSMUST00000 | 0.000350052  | -1.61925 | E11.5 * Wnt1 down vs E11.5 * Ctrl |
| 10350516 | Ptgs2         | NM_011198    | 0.00655154   | -1.61929 | E11.5 * Wnt1 down vs E11.5 * Ctrl |
| 10549504 | Dennd5b       | NM_177192    | 0.000890764  | -1.6196  | E11.5 * Wnt1 down vs E11.5 * Ctrl |
| 10401068 | Spnb1         | NM_013675    | 3.499e-006   | -1.62066 | E11.5 * Wnt1 down vs E11.5 * Ctrl |
| 10508012 | Rspo1         | NM_138683    | 0.000178154  | -1.62096 | E11.5 * Wnt1 down vs E11.5 * Ctrl |
| 10569618 | Ano1          | NM_178642    | 0.00105766   | -1.624   | E11.5 * Wnt1 down vs E11.5 * Ctrl |
| 10528385 | Reln          | NM_011261    | 2.47619e-006 | -1.62438 | E11.5 * Wnt1 down vs E11.5 * Ctrl |
| 10359339 | Rabgap1l      | NM_013862    | 2.82452e-005 | -1.62532 | E11.5 * Wnt1 down vs E11.5 * Ctrl |
| 10579894 | Hhip          | NM_020259    | 0.00160468   | -1.62538 | E11.5 * Wnt1 down vs E11.5 * Ctrl |
| 10521616 | C1qtnf7       | NM_001135172 | 2.13543e-005 | -1.62597 | E11.5 * Wnt1 down vs E11.5 * Ctrl |
| 10346607 | Fzd7          | NM_008057    | 7.72285e-008 | -1.62644 | E11.5 * Wnt1 down vs E11.5 * Ctrl |
| 10557033 | Eef2k         | ENSMUST00000 | 3.81706e-005 | -1.62667 | E11.5 * Wnt1 down vs E11.5 * Ctrl |
| 10601848 | 6530401D17Rik | NR_003641    | 0.00284348   | -1.62672 | E11.5 * Wnt1 down vs E11.5 * Ctrl |
| 10376201 | Gpx3          | NM_001083929 | 2.33379e-006 | -1.6274  | E11.5 * Wnt1 down vs E11.5 * Ctrl |
| 10447317 | Epas1         | NM_010137    | 0.000510445  | -1.62908 | E11.5 * Wnt1 down vs E11.5 * Ctrl |
| 10578904 | Cpe           | NM_013494    | 9.13375e-008 | -1.63053 | E11.5 * Wnt1 down vs E11.5 * Ctrl |
| 10462132 | E030010A14Rik | NM_183160    | 1.12694e-006 | -1.63095 | E11.5 * Wnt1 down vs E11.5 * Ctrl |
| 10383168 | ---           | ---          | 3.45262e-006 | -1.6316  | E11.5 * Wnt1 down vs E11.5 * Ctrl |
| 10588819 | 1700021K14Rik | NM_001122635 | 0.000228034  | -1.63194 | E11.5 * Wnt1 down vs E11.5 * Ctrl |
| 10455054 | Pcdhb3        | NM_053128    | 0.000811767  | -1.632   | E11.5 * Wnt1 down vs E11.5 * Ctrl |
| 10408898 | ---           | ---          | 0.00114285   | -1.63277 | E11.5 * Wnt1 down vs E11.5 * Ctrl |
| 10469695 | Apbb1ip       | NM_019456    | 1.78291e-005 | -1.63454 | E11.5 * Wnt1 down vs E11.5 * Ctrl |
| 10495416 | Vav3          | NM_020505    | 5.13128e-005 | -1.6362  | E11.5 * Wnt1 down vs E11.5 * Ctrl |
| 10406663 | Arsb          | NM_009712    | 0.000572446  | -1.63629 | E11.5 * Wnt1 down vs E11.5 * Ctrl |
| 10369154 | Man1a         | NM_008548    | 0.00112303   | -1.63712 | E11.5 * Wnt1 down vs E11.5 * Ctrl |
| 10414102 | Mmrn2         | NM_153127    | 0.000699116  | -1.6375  | E11.5 * Wnt1 down vs E11.5 * Ctrl |
| 10536494 | Cav2          | NM_016900    | 2.28786e-005 | -1.63863 | E11.5 * Wnt1 down vs E11.5 * Ctrl |
| 10353729 | 4930444G20Rik | NM_053264    | 0.00658781   | -1.63887 | E11.5 * Wnt1 down vs E11.5 * Ctrl |
| 10433782 | Efcab1        | NM_025769    | 2.47309e-005 | -1.63904 | E11.5 * Wnt1 down vs E11.5 * Ctrl |
| 10422844 | Gdnf          | NM_010275    | 1.31747e-005 | -1.64056 | E11.5 * Wnt1 down vs E11.5 * Ctrl |
| 10383765 | ---           | ---          | 0.00608103   | -1.64065 | E11.5 * Wnt1 down vs E11.5 * Ctrl |
| 10359929 | Ddr2          | NM_022563    | 0.000110354  | -1.64339 | E11.5 * Wnt1 down vs E11.5 * Ctrl |
| 10455139 | Pcdhb22       | NM_053147    | 0.000117256  | -1.64457 | E11.5 * Wnt1 down vs E11.5 * Ctrl |
| 10436182 | Cd47          | NM_010581    | 7.45346e-006 | -1.64507 | E11.5 * Wnt1 down vs E11.5 * Ctrl |
| 10354247 | Fhl2          | NM_010212    | 1.23117e-005 | -1.64515 | E11.5 * Wnt1 down vs E11.5 * Ctrl |
| 10536472 | Mdfic         | NM_175088    | 0.000155519  | -1.64523 | E11.5 * Wnt1 down vs E11.5 * Ctrl |
| 10514926 | B230314M03Rik | ENSMUST00000 | 4.73337e-006 | -1.64523 | E11.5 * Wnt1 down vs E11.5 * Ctrl |
| 10506335 | Pde4b         | NM_019840    | 3.33088e-005 | -1.64591 | E11.5 * Wnt1 down vs E11.5 * Ctrl |
| 10546510 | Lrig1         | NM_008377    | 1.32339e-005 | -1.64601 | E11.5 * Wnt1 down vs E11.5 * Ctrl |
| 10478048 | Lbp           | NM_008489    | 3.97477e-006 | -1.64707 | E11.5 * Wnt1 down vs E11.5 * Ctrl |
| 10380285 | Tmem100       | NM_026433    | 0.000644475  | -1.64727 | E11.5 * Wnt1 down vs E11.5 * Ctrl |
| 10436590 | 2810055G20Rik | AK148800     | 0.00191765   | -1.64777 | E11.5 * Wnt1 down vs E11.5 * Ctrl |
| 10360382 | Ifi204        | NM_008329    | 0.00420336   | -1.64948 | E11.5 * Wnt1 down vs E11.5 * Ctrl |
| 10444258 | Psmb8         | NM_010724    | 7.11481e-005 | -1.65047 | E11.5 * Wnt1 down vs E11.5 * Ctrl |
| 10548940 | Lmo3          | NM_207222    | 0.00115786   | -1.651   | E11.5 * Wnt1 down vs E11.5 * Ctrl |
| 10388958 | Evi2a         | NM_001033711 | 0.000787687  | -1.65122 | E11.5 * Wnt1 down vs E11.5 * Ctrl |
| 10406205 | Erap1         | NM_030711    | 0.000229116  | -1.65248 | E11.5 * Wnt1 down vs E11.5 * Ctrl |
| 10559248 | Tspan32       | NM_020286    | 9.65251e-008 | -1.65319 | E11.5 * Wnt1 down vs E11.5 * Ctrl |
| 10536505 | Met           | NM_008591    | 0.000202488  | -1.65322 | E11.5 * Wnt1 down vs E11.5 * Ctrl |
| 10373223 | Lrp1          | NM_008512    | 0.000661904  | -1.65335 | E11.5 * Wnt1 down vs E11.5 * Ctrl |
| 10408280 | Lrrc16a       | NM_026825    | 7.09597e-007 | -1.65374 | E11.5 * Wnt1 down vs E11.5 * Ctrl |
| 10561453 | Zfp36         | NM_011756    | 0.000405591  | -1.655   | E11.5 * Wnt1 down vs E11.5 * Ctrl |
| 10355227 | 1110028C15Rik | NM_001122738 | 7.06504e-006 | -1.65502 | E11.5 * Wnt1 down vs E11.5 * Ctrl |

|                        |               |              |          |                                   |
|------------------------|---------------|--------------|----------|-----------------------------------|
| 10522060 Fam114a1      | NM_026667     | 5.86156e-005 | -1.65563 | E11.5 * Wnt1 down vs E11.5 * Ctrl |
| 10358210 Nr5a2         | NM_001159769  | 0.000436215  | -1.65607 | E11.5 * Wnt1 down vs E11.5 * Ctrl |
| 10428522 Csmcd3        | NM_001081391  | 0.00210871   | -1.65608 | E11.5 * Wnt1 down vs E11.5 * Ctrl |
| 10434741               | ---           | 0.00298223   | -1.65696 | E11.5 * Wnt1 down vs E11.5 * Ctrl |
| 10470555 Gbgt1         | NM_139197     | 3.90907e-005 | -1.65736 | E11.5 * Wnt1 down vs E11.5 * Ctrl |
| 10488147 Flrt3         | NM_178382     | 2.0978e-006  | -1.65784 | E11.5 * Wnt1 down vs E11.5 * Ctrl |
| 10493307               | ---           | 0.00466232   | -1.65833 | E11.5 * Wnt1 down vs E11.5 * Ctrl |
| 10443980 Myo1f         | NM_053214     | 0.000720959  | -1.6591  | E11.5 * Wnt1 down vs E11.5 * Ctrl |
| 10406551 Ssbp2         | NM_024272     | 1.14644e-008 | -1.65937 | E11.5 * Wnt1 down vs E11.5 * Ctrl |
| 10354576 Dnahc7a       | ENSMUST000001 | 0.0049556    | -1.65947 | E11.5 * Wnt1 down vs E11.5 * Ctrl |
| 10526441 Upk3b         | NM_175309     | 0.000161611  | -1.66283 | E11.5 * Wnt1 down vs E11.5 * Ctrl |
| 10363887 Bicc1         | NM_031397     | 0.0014891    | -1.66376 | E11.5 * Wnt1 down vs E11.5 * Ctrl |
| 10531201 Adamts3       | NM_001081401  | 6.52177e-005 | -1.66448 | E11.5 * Wnt1 down vs E11.5 * Ctrl |
| 10515803 1110020C03Rik | BC062805      | 1.03985e-005 | -1.66476 | E11.5 * Wnt1 down vs E11.5 * Ctrl |
| 10434782 Lpp           | NM_178665     | 1.20585e-005 | -1.66482 | E11.5 * Wnt1 down vs E11.5 * Ctrl |
| 10503659 EphA7         | NM_010141     | 1.65917e-008 | -1.66529 | E11.5 * Wnt1 down vs E11.5 * Ctrl |
| 10599348 Gria3         | NM_016886     | 7.79287e-007 | -1.66582 | E11.5 * Wnt1 down vs E11.5 * Ctrl |
| 10397715               | ---           | 0.00132132   | -1.6678  | E11.5 * Wnt1 down vs E11.5 * Ctrl |
| 10409866 CtlA2b        | NM_007797     | 0.000168521  | -1.66838 | E11.5 * Wnt1 down vs E11.5 * Ctrl |
| 10606600 Pcdh19        | NM_001105245  | 3.80975e-005 | -1.6692  | E11.5 * Wnt1 down vs E11.5 * Ctrl |
| 10573457 Klf1          | NM_010635     | 1.45727e-005 | -1.66979 | E11.5 * Wnt1 down vs E11.5 * Ctrl |
| 10541491 1700063H04Rik | ENSMUST000001 | 1.49581e-006 | -1.66992 | E11.5 * Wnt1 down vs E11.5 * Ctrl |
| 10368585 Nkain2        | NM_001013411  | 7.07333e-005 | -1.67272 | E11.5 * Wnt1 down vs E11.5 * Ctrl |
| 10505779 Acer2         | NM_139306     | 2.9405e-005  | -1.67305 | E11.5 * Wnt1 down vs E11.5 * Ctrl |
| 10450145 Psmb9         | NM_013585     | 6.91724e-005 | -1.67328 | E11.5 * Wnt1 down vs E11.5 * Ctrl |
| 10351347 Creg1         | NM_011804     | 9.59895e-006 | -1.67336 | E11.5 * Wnt1 down vs E11.5 * Ctrl |
| 10474642 BC052040      | NM_001145898  | 3.25118e-005 | -1.67478 | E11.5 * Wnt1 down vs E11.5 * Ctrl |
| 10527963               | ---           | 3.27009e-005 | -1.67719 | E11.5 * Wnt1 down vs E11.5 * Ctrl |
| 10373179 Gli1          | NM_010296     | 3.21313e-006 | -1.68086 | E11.5 * Wnt1 down vs E11.5 * Ctrl |
| 10519324 Cdk6          | NM_009873     | 1.14847e-006 | -1.68387 | E11.5 * Wnt1 down vs E11.5 * Ctrl |
| 10507137 Pdzk1ip1      | NM_026018     | 4.88337e-007 | -1.68423 | E11.5 * Wnt1 down vs E11.5 * Ctrl |
| 10607945 4933400A11Rik | NR_003635     | 0.000189378  | -1.68452 | E11.5 * Wnt1 down vs E11.5 * Ctrl |
| 10457686 Dsc2          | NM_013505     | 4.62601e-007 | -1.68509 | E11.5 * Wnt1 down vs E11.5 * Ctrl |
| 10586722 F830001A07Rik | AK045567      | 0.000557572  | -1.6851  | E11.5 * Wnt1 down vs E11.5 * Ctrl |
| 10359870 Pbx1          | NM_183355     | 5.32655e-005 | -1.68567 | E11.5 * Wnt1 down vs E11.5 * Ctrl |
| 10527051 Sdk1          | NM_177879     | 9.80707e-006 | -1.68597 | E11.5 * Wnt1 down vs E11.5 * Ctrl |
| 10489377 Serinc3       | NM_012032     | 1.35722e-010 | -1.68723 | E11.5 * Wnt1 down vs E11.5 * Ctrl |
| 10448094 Lnpep         | NM_172827     | 3.54494e-006 | -1.68737 | E11.5 * Wnt1 down vs E11.5 * Ctrl |
| 10589886 4930520O04Rik | AK040958      | 8.56408e-005 | -1.68788 | E11.5 * Wnt1 down vs E11.5 * Ctrl |
| 10555087               | ---           | 0.00296723   | -1.6887  | E11.5 * Wnt1 down vs E11.5 * Ctrl |
| 10365845 Fgd6          | NM_053072     | 2.43415e-006 | -1.68919 | E11.5 * Wnt1 down vs E11.5 * Ctrl |
| 10482509 Rbm43         | NM_001141981  | 5.08184e-005 | -1.69087 | E11.5 * Wnt1 down vs E11.5 * Ctrl |
| 10602385 Pfkfb1        | NM_008824     | 0.00160495   | -1.69135 | E11.5 * Wnt1 down vs E11.5 * Ctrl |
| 10385118 Dock2         | NM_033374     | 0.000129345  | -1.6915  | E11.5 * Wnt1 down vs E11.5 * Ctrl |
| 10468691 Ablim1        | NM_178688     | 7.0516e-007  | -1.69233 | E11.5 * Wnt1 down vs E11.5 * Ctrl |
| 10531980 BC057170      | NM_172777     | 0.000261967  | -1.69261 | E11.5 * Wnt1 down vs E11.5 * Ctrl |
| 10414262 Ear2          | NM_007895     | 5.74584e-005 | -1.69262 | E11.5 * Wnt1 down vs E11.5 * Ctrl |
| 10359201 Ralgps2       | NM_023884     | 4.78527e-010 | -1.6927  | E11.5 * Wnt1 down vs E11.5 * Ctrl |
| 10578989 Psd3          | NM_177698     | 1.88863e-005 | -1.69276 | E11.5 * Wnt1 down vs E11.5 * Ctrl |
| 10566943 Mrvi1         | NM_010826     | 3.55424e-005 | -1.6931  | E11.5 * Wnt1 down vs E11.5 * Ctrl |
| 10562709 Cd33          | NM_001111058  | 2.18896e-007 | -1.69341 | E11.5 * Wnt1 down vs E11.5 * Ctrl |
| 10456296 Malt1         | NM_172833     | 1.59053e-005 | -1.69356 | E11.5 * Wnt1 down vs E11.5 * Ctrl |
| 10497451 Cpa3          | NM_007753     | 0.00680333   | -1.6936  | E11.5 * Wnt1 down vs E11.5 * Ctrl |
| 10348244 Inpp5d        | NM_010566     | 5.24471e-006 | -1.6941  | E11.5 * Wnt1 down vs E11.5 * Ctrl |
| 10348632 Twist2        | NM_007855     | 2.67378e-005 | -1.69467 | E11.5 * Wnt1 down vs E11.5 * Ctrl |
| 10427052 Krt7          | NM_033073     | 0.000408549  | -1.69529 | E11.5 * Wnt1 down vs E11.5 * Ctrl |
| 10425092 Cyth4         | NM_028195     | 3.04464e-006 | -1.69853 | E11.5 * Wnt1 down vs E11.5 * Ctrl |
| 10450496 Lst1          | NM_010734     | 7.48072e-005 | -1.69861 | E11.5 * Wnt1 down vs E11.5 * Ctrl |
| 10439312 Cd86          | NM_019388     | 0.00320802   | -1.69937 | E11.5 * Wnt1 down vs E11.5 * Ctrl |
| 10511817 Klf132        | ENSMUST000001 | 0.00459071   | -1.70234 | E11.5 * Wnt1 down vs E11.5 * Ctrl |
| 10511560 Esrp1         | NM_194055     | 0.00033602   | -1.70758 | E11.5 * Wnt1 down vs E11.5 * Ctrl |
| 10531173 Adamts3       | NM_001081401  | 0.000239129  | -1.71211 | E11.5 * Wnt1 down vs E11.5 * Ctrl |
| 10502081 Lnpep         | NM_007934     | 4.33138e-006 | -1.71237 | E11.5 * Wnt1 down vs E11.5 * Ctrl |
| 10435305 Itgb5         | NM_001145884  | 6.42295e-008 | -1.71302 | E11.5 * Wnt1 down vs E11.5 * Ctrl |
| 10446253 Vav1          | NM_011691     | 0.000114511  | -1.71384 | E11.5 * Wnt1 down vs E11.5 * Ctrl |
| 10580349 Mylk3         | NM_175441     | 9.81385e-006 | -1.71559 | E11.5 * Wnt1 down vs E11.5 * Ctrl |

|                        |              |              |          |                                   |
|------------------------|--------------|--------------|----------|-----------------------------------|
| 10474201 Lmo2          | NM_008505    | 4.80605e-006 | -1.71628 | E11.5 * Wnt1 down vs E11.5 * Ctrl |
| 10401673 Tgfb3         | NM_009368    | 0.000523823  | -1.71795 | E11.5 * Wnt1 down vs E11.5 * Ctrl |
| 10408220 Hist1h2ac     | NM_178189    | 0.00644191   | -1.71822 | E11.5 * Wnt1 down vs E11.5 * Ctrl |
| 10534493 Ccl24         | NM_019577    | 8.66189e-005 | -1.71853 | E11.5 * Wnt1 down vs E11.5 * Ctrl |
| 10551347 Blvrb         | NM_144923    | 4.66657e-007 | -1.71883 | E11.5 * Wnt1 down vs E11.5 * Ctrl |
| 10453797 AK220484      | NM_001083628 | 1.501e-005   | -1.72098 | E11.5 * Wnt1 down vs E11.5 * Ctrl |
| 10603573 Sytl5         | NM_177704    | 9.75458e-006 | -1.72238 | E11.5 * Wnt1 down vs E11.5 * Ctrl |
| 10439058 Lrrc33        | NM_146069    | 5.22115e-006 | -1.72306 | E11.5 * Wnt1 down vs E11.5 * Ctrl |
| 10509441 Ece1          | NM_199307    | 0.000121323  | -1.72584 | E11.5 * Wnt1 down vs E11.5 * Ctrl |
| 10439895 Alcam         | NM_009655    | 2.98053e-005 | -1.7269  | E11.5 * Wnt1 down vs E11.5 * Ctrl |
| 10513152 Ptpn3         | NM_011207    | 0.00817637   | -1.72698 | E11.5 * Wnt1 down vs E11.5 * Ctrl |
| 10572527 EG665858      | ENSMUST00000 | 0.00208708   | -1.72829 | E11.5 * Wnt1 down vs E11.5 * Ctrl |
| 10394731 Rock2         | ENSMUST00000 | 0.000163933  | -1.72866 | E11.5 * Wnt1 down vs E11.5 * Ctrl |
| 10488378 Thbd          | NM_009378    | 0.000432955  | -1.73006 | E11.5 * Wnt1 down vs E11.5 * Ctrl |
| 10496569 Gbp6          | NM_145545    | 8.64549e-006 | -1.7314  | E11.5 * Wnt1 down vs E11.5 * Ctrl |
| 10594066 Loxl1         | NM_010729    | 0.000165593  | -1.73168 | E11.5 * Wnt1 down vs E11.5 * Ctrl |
| 10493604 She           | NM_172530    | 9.19777e-007 | -1.73184 | E11.5 * Wnt1 down vs E11.5 * Ctrl |
| 10571444 Slc7a2        | NM_007514    | 9.36479e-005 | -1.73315 | E11.5 * Wnt1 down vs E11.5 * Ctrl |
| 10439126               | ---          | 2.83605e-005 | -1.73326 | E11.5 * Wnt1 down vs E11.5 * Ctrl |
| 10549162 St8sia1       | NM_011374    | 8.13036e-006 | -1.73378 | E11.5 * Wnt1 down vs E11.5 * Ctrl |
| 10513154 Ptpn3         | NM_011207    | 0.0002494    | -1.73504 | E11.5 * Wnt1 down vs E11.5 * Ctrl |
| 10602221               | ---          | 0.00114017   | -1.73522 | E11.5 * Wnt1 down vs E11.5 * Ctrl |
| 10539894 Mgll          | NM_011844    | 0.000162567  | -1.73555 | E11.5 * Wnt1 down vs E11.5 * Ctrl |
| 10590631 Ccr2          | NM_009915    | 0.0002185    | -1.73598 | E11.5 * Wnt1 down vs E11.5 * Ctrl |
| 10410039 Ptch1         | NM_008957    | 8.85577e-006 | -1.7394  | E11.5 * Wnt1 down vs E11.5 * Ctrl |
| 10541587 Clec4a2       | NM_011999    | 0.000377975  | -1.73957 | E11.5 * Wnt1 down vs E11.5 * Ctrl |
| 10607467 Sat1          | NM_009121    | 9.59915e-005 | -1.7407  | E11.5 * Wnt1 down vs E11.5 * Ctrl |
| 10364444 Madcam1       | NM_013591    | 0.000161776  | -1.74075 | E11.5 * Wnt1 down vs E11.5 * Ctrl |
| 10498852 Rxfp1         | NM_212452    | 5.78994e-007 | -1.74108 | E11.5 * Wnt1 down vs E11.5 * Ctrl |
| 10385477               | ---          | 0.00225148   | -1.74398 | E11.5 * Wnt1 down vs E11.5 * Ctrl |
| 10497580               | ---          | 0.00879565   | -1.74403 | E11.5 * Wnt1 down vs E11.5 * Ctrl |
| 10404359 Mboat1        | NM_153546    | 3.07795e-006 | -1.74687 | E11.5 * Wnt1 down vs E11.5 * Ctrl |
| 10604608               | ---          | 0.000331265  | -1.74688 | E11.5 * Wnt1 down vs E11.5 * Ctrl |
| 10604694 Mtap7d3       | NM_177293    | 0.000447103  | -1.74802 | E11.5 * Wnt1 down vs E11.5 * Ctrl |
| 10554140 Zic4          | BC116191     | 1.70105e-006 | -1.74843 | E11.5 * Wnt1 down vs E11.5 * Ctrl |
| 10548899 Rerg          | NM_181988    | 3.0517e-005  | -1.74981 | E11.5 * Wnt1 down vs E11.5 * Ctrl |
| 10499536 Efna1         | NM_010107    | 2.35168e-007 | -1.75058 | E11.5 * Wnt1 down vs E11.5 * Ctrl |
| 10420891 Scara3        | NM_172604    | 4.66251e-005 | -1.75059 | E11.5 * Wnt1 down vs E11.5 * Ctrl |
| 10396270 Dact1         | NM_021532    | 0.000106441  | -1.75111 | E11.5 * Wnt1 down vs E11.5 * Ctrl |
| 10441902 Smoc2         | NM_022315    | 1.42029e-005 | -1.75345 | E11.5 * Wnt1 down vs E11.5 * Ctrl |
| 10459071 2010002N04Rik | NM_134133    | 6.27497e-006 | -1.75429 | E11.5 * Wnt1 down vs E11.5 * Ctrl |
| 10519855 Cacna2d1      | NM_001110843 | 8.50926e-005 | -1.75568 | E11.5 * Wnt1 down vs E11.5 * Ctrl |
| 10435565 Hcls1         | NM_008225    | 2.19525e-005 | -1.75602 | E11.5 * Wnt1 down vs E11.5 * Ctrl |
| 10407126 Plk2          | NM_152804    | 3.03081e-005 | -1.75705 | E11.5 * Wnt1 down vs E11.5 * Ctrl |
| 10510150 OTTMUSG00000  | NM_001014397 | 0.00132374   | -1.75732 | E11.5 * Wnt1 down vs E11.5 * Ctrl |
| 10521796               | ---          | 0.0019814    | -1.76265 | E11.5 * Wnt1 down vs E11.5 * Ctrl |
| 10591978 Ntm           | NM_172290    | 1.49265e-005 | -1.76267 | E11.5 * Wnt1 down vs E11.5 * Ctrl |
| 10531179 Adamts3       | NM_001081401 | 8.05363e-005 | -1.76276 | E11.5 * Wnt1 down vs E11.5 * Ctrl |
| 10400304 Egn3          | NM_028133    | 0.000806506  | -1.76391 | E11.5 * Wnt1 down vs E11.5 * Ctrl |
| 10484203 2610301F02Rik | ENSMUST00000 | 4.67795e-007 | -1.76448 | E11.5 * Wnt1 down vs E11.5 * Ctrl |
| 10360377 Al607873      | BC150711     | 0.000774159  | -1.76486 | E11.5 * Wnt1 down vs E11.5 * Ctrl |
| 10534906 OTTMUSG00000  | ENSMUST00000 | 0.000127327  | -1.76711 | E11.5 * Wnt1 down vs E11.5 * Ctrl |
| 10606366 Zcchc5        | NM_199468    | 0.000533197  | -1.76742 | E11.5 * Wnt1 down vs E11.5 * Ctrl |
| 10354598 Hecw2         | NM_001001883 | 2.84976e-006 | -1.76854 | E11.5 * Wnt1 down vs E11.5 * Ctrl |
| 10591090 Fat3          | NM_001080814 | 6.22059e-005 | -1.77062 | E11.5 * Wnt1 down vs E11.5 * Ctrl |
| 10503835 Rragd         | NM_027491    | 2.14402e-006 | -1.77072 | E11.5 * Wnt1 down vs E11.5 * Ctrl |
| 10458843 Sema6a        | NM_018744    | 3.50154e-007 | -1.77216 | E11.5 * Wnt1 down vs E11.5 * Ctrl |
| 10422022 ENSMUSG00000  | ENSMUST00000 | 0.000494236  | -1.77291 | E11.5 * Wnt1 down vs E11.5 * Ctrl |
| 10399924 Pik3cg        | NM_020272    | 4.04837e-006 | -1.77332 | E11.5 * Wnt1 down vs E11.5 * Ctrl |
| 10478928 Tshz2         | NM_080455    | 4.64546e-009 | -1.77399 | E11.5 * Wnt1 down vs E11.5 * Ctrl |
| 10386211 3100002J23Rik | ENSMUST00000 | 0.00144544   | -1.77473 | E11.5 * Wnt1 down vs E11.5 * Ctrl |
| 10526797 Stag3         | NM_016964    | 6.32597e-007 | -1.77632 | E11.5 * Wnt1 down vs E11.5 * Ctrl |
| 10523128 Ppbp          | NM_023785    | 7.76361e-005 | -1.77787 | E11.5 * Wnt1 down vs E11.5 * Ctrl |
| 10603182 Arhgap6       | NM_009707    | 4.69336e-005 | -1.77788 | E11.5 * Wnt1 down vs E11.5 * Ctrl |
| 10538715 C130092O11Rik | BC107398     | 7.10858e-006 | -1.77937 | E11.5 * Wnt1 down vs E11.5 * Ctrl |
| 10399691 Id2           | NM_010496    | 1.54474e-006 | -1.78129 | E11.5 * Wnt1 down vs E11.5 * Ctrl |

|          |               |              |              |          |                                   |
|----------|---------------|--------------|--------------|----------|-----------------------------------|
| 10492438 | EG624866      | NM_001037923 | 5.07981e-006 | -1.78136 | E11.5 * Wnt1 down vs E11.5 * Ctrl |
| 10528821 | ENSMUSG00000  | NM_001134299 | 3.48587e-007 | -1.78155 | E11.5 * Wnt1 down vs E11.5 * Ctrl |
| 10554599 | Adamts13      | ENSMUST00000 | 2.27449e-005 | -1.7823  | E11.5 * Wnt1 down vs E11.5 * Ctrl |
| 10427906 | D130046C19Rik | AK051399     | 0.00138267   | -1.783   | E11.5 * Wnt1 down vs E11.5 * Ctrl |
| 10425749 | Fam109b       | NM_177391    | 3.11688e-005 | -1.7831  | E11.5 * Wnt1 down vs E11.5 * Ctrl |
| 10368566 | Tpd52l1       | NM_009413    | 0.000167565  | -1.78379 | E11.5 * Wnt1 down vs E11.5 * Ctrl |
| 10539211 | Lrrtm4        | NR_027323    | 6.71211e-007 | -1.78901 | E11.5 * Wnt1 down vs E11.5 * Ctrl |
| 10507500 | Slc6a9        | NM_008135    | 2.73111e-007 | -1.79211 | E11.5 * Wnt1 down vs E11.5 * Ctrl |
| 10555323 | P4ha3         | NM_177161    | 3.79291e-005 | -1.79406 | E11.5 * Wnt1 down vs E11.5 * Ctrl |
| 10455128 | Pcdhb20       | NM_053145    | 0.000513603  | -1.79412 | E11.5 * Wnt1 down vs E11.5 * Ctrl |
| 10506488 | Ppap2b        | NM_080555    | 0.000427852  | -1.79736 | E11.5 * Wnt1 down vs E11.5 * Ctrl |
| 10567580 | Igsf6         | NM_030691    | 2.61844e-005 | -1.79857 | E11.5 * Wnt1 down vs E11.5 * Ctrl |
| 10406782 | Fam169a       | NM_001100458 | 0.000487806  | -1.79899 | E11.5 * Wnt1 down vs E11.5 * Ctrl |
| 10372807 | Msrb3         | NM_177092    | 4.84785e-006 | -1.79917 | E11.5 * Wnt1 down vs E11.5 * Ctrl |
| 10462922 | Plce1         | NM_019588    | 2.18402e-009 | -1.8012  | E11.5 * Wnt1 down vs E11.5 * Ctrl |
| 10544788 | Hoxa9         | NM_010456    | 1.53611e-005 | -1.80179 | E11.5 * Wnt1 down vs E11.5 * Ctrl |
| 10354003 | Mgat4a        | NM_173870    | 0.00114236   | -1.80179 | E11.5 * Wnt1 down vs E11.5 * Ctrl |
| 10489569 | Pltp          | NM_011125    | 8.57924e-008 | -1.80222 | E11.5 * Wnt1 down vs E11.5 * Ctrl |
| 10547621 | Apobec1       | NM_031159    | 8.08676e-008 | -1.8036  | E11.5 * Wnt1 down vs E11.5 * Ctrl |
| 10596115 | Ephb1         | AK082061     | 5.44944e-005 | -1.80388 | E11.5 * Wnt1 down vs E11.5 * Ctrl |
| 10375055 | F830116E18Rik | NM_001033981 | 0.000329531  | -1.80539 | E11.5 * Wnt1 down vs E11.5 * Ctrl |
| 10495967 | Tifa          | NM_145133    | 6.96986e-007 | -1.8067  | E11.5 * Wnt1 down vs E11.5 * Ctrl |
| 10528804 | ENSMUSG00000  | NM_001134299 | 8.70339e-007 | -1.80725 | E11.5 * Wnt1 down vs E11.5 * Ctrl |
| 10458894 | Lox           | NM_010728    | 0.000476957  | -1.80803 | E11.5 * Wnt1 down vs E11.5 * Ctrl |
| 10363132 | Nepn          | NM_025684    | 0.000105819  | -1.81175 | E11.5 * Wnt1 down vs E11.5 * Ctrl |
| 10427816 | Pdzd2         | NM_001081064 | 1.43583e-006 | -1.81405 | E11.5 * Wnt1 down vs E11.5 * Ctrl |
| 10412298 | Itga1         | NM_001033228 | 0.000915638  | -1.81484 | E11.5 * Wnt1 down vs E11.5 * Ctrl |
| 10369792 | Arid5b        | NM_023598    | 0.000113372  | -1.81614 | E11.5 * Wnt1 down vs E11.5 * Ctrl |
| 10570963 | Zmat4         | NM_177086    | 1.73444e-006 | -1.81621 | E11.5 * Wnt1 down vs E11.5 * Ctrl |
| 10368947 | Aim1          | NM_172393    | 2.9206e-005  | -1.81811 | E11.5 * Wnt1 down vs E11.5 * Ctrl |
| 10536845 | Flnc          | NM_001081185 | 2.75954e-007 | -1.81837 | E11.5 * Wnt1 down vs E11.5 * Ctrl |
| 10395606 | ENSMUSG00000  | ENSMUST00000 | 0.000273043  | -1.82012 | E11.5 * Wnt1 down vs E11.5 * Ctrl |
| 10474700 | Thbs1         | NM_011580    | 1.5808e-006  | -1.82059 | E11.5 * Wnt1 down vs E11.5 * Ctrl |
| 10485633 | ENSMUSG00000  | ENSMUST00000 | 0.00318131   | -1.82112 | E11.5 * Wnt1 down vs E11.5 * Ctrl |
| 10463263 | Lztf1         | NM_033322    | 0.000185346  | -1.8217  | E11.5 * Wnt1 down vs E11.5 * Ctrl |
| 10369844 | Bicc1         | NM_031397    | 6.65589e-007 | -1.82259 | E11.5 * Wnt1 down vs E11.5 * Ctrl |
| 10531183 | Adamts3       | NM_001081401 | 8.73483e-006 | -1.82557 | E11.5 * Wnt1 down vs E11.5 * Ctrl |
| 10566326 | Trim12        | NM_023835    | 0.000403968  | -1.82765 | E11.5 * Wnt1 down vs E11.5 * Ctrl |
| 10542172 | Clec1b        | NM_019985    | 6.05224e-007 | -1.82807 | E11.5 * Wnt1 down vs E11.5 * Ctrl |
| 10414537 | Ang           | NM_007447    | 1.00685e-005 | -1.82908 | E11.5 * Wnt1 down vs E11.5 * Ctrl |
| 10368720 | Slc16a10      | NM_001114332 | 9.55419e-009 | -1.8299  | E11.5 * Wnt1 down vs E11.5 * Ctrl |
| 10598976 | Timp1         | NM_001044384 | 1.30057e-005 | -1.83055 | E11.5 * Wnt1 down vs E11.5 * Ctrl |
| 10366645 | 1700006J14Rik | ENSMUST00000 | 2.43602e-005 | -1.8311  | E11.5 * Wnt1 down vs E11.5 * Ctrl |
| 10497265 | Fabp4         | NM_024406    | 0.000787885  | -1.83127 | E11.5 * Wnt1 down vs E11.5 * Ctrl |
| 10594199 | Thsd4         | NM_001040426 | 4.23317e-006 | -1.83231 | E11.5 * Wnt1 down vs E11.5 * Ctrl |
| 10522749 | Lphn3         | NM_198702    | 2.18993e-006 | -1.83241 | E11.5 * Wnt1 down vs E11.5 * Ctrl |
| 10502451 | Bmpr1b        | NM_007560    | 3.43713e-005 | -1.83246 | E11.5 * Wnt1 down vs E11.5 * Ctrl |
| 10427918 | Fam105a       | BC052328     | 1.24665e-006 | -1.83262 | E11.5 * Wnt1 down vs E11.5 * Ctrl |
| 10408329 | Gmnn          | AF068780     | 0.00153715   | -1.83351 | E11.5 * Wnt1 down vs E11.5 * Ctrl |
| 10375145 | Lcp2          | NM_010696    | 1.85364e-005 | -1.83493 | E11.5 * Wnt1 down vs E11.5 * Ctrl |
| 10588899 | Gpx1          | NM_008160    | 0.000231021  | -1.83509 | E11.5 * Wnt1 down vs E11.5 * Ctrl |
| 10459391 | Fech          | NM_007998    | 8.20535e-008 | -1.83673 | E11.5 * Wnt1 down vs E11.5 * Ctrl |
| 10471912 | Kynu          | NM_027552    | 0.000284627  | -1.83852 | E11.5 * Wnt1 down vs E11.5 * Ctrl |
| 10377938 | Eno3          | NM_007933    | 6.82442e-007 | -1.83886 | E11.5 * Wnt1 down vs E11.5 * Ctrl |
| 10398319 | Dlk1          | NM_010052    | 0.000596063  | -1.83904 | E11.5 * Wnt1 down vs E11.5 * Ctrl |
| 10560624 | Apoe          | NM_009696    | 2.50051e-007 | -1.84073 | E11.5 * Wnt1 down vs E11.5 * Ctrl |
| 10416974 | Gpc6          | NM_001079844 | 1.03961e-006 | -1.84458 | E11.5 * Wnt1 down vs E11.5 * Ctrl |
| 10503520 | Tpa           | NM_015767    | 2.84589e-005 | -1.84646 | E11.5 * Wnt1 down vs E11.5 * Ctrl |
| 10565958 | P2ry6         | NM_183168    | 2.24278e-006 | -1.84782 | E11.5 * Wnt1 down vs E11.5 * Ctrl |
| 10593832 | ---           | ---          | 0.00174927   | -1.85015 | E11.5 * Wnt1 down vs E11.5 * Ctrl |
| 10368317 | Enpp3         | NM_134005    | 3.26031e-008 | -1.85134 | E11.5 * Wnt1 down vs E11.5 * Ctrl |
| 10514128 | Ttc39b        | NM_027238    | 0.000385054  | -1.85285 | E11.5 * Wnt1 down vs E11.5 * Ctrl |
| 10528476 | ---           | ---          | 0.00249778   | -1.8531  | E11.5 * Wnt1 down vs E11.5 * Ctrl |
| 10447602 | Ezr           | NM_009510    | 1.28552e-006 | -1.85533 | E11.5 * Wnt1 down vs E11.5 * Ctrl |
| 10360834 | Hlx           | NM_008250    | 6.29888e-007 | -1.85577 | E11.5 * Wnt1 down vs E11.5 * Ctrl |
| 10594110 | Neo1          | NM_008684    | 1.11239e-010 | -1.85667 | E11.5 * Wnt1 down vs E11.5 * Ctrl |

|                        |              |              |          |                                   |
|------------------------|--------------|--------------|----------|-----------------------------------|
| 10461369 Ahnak         | NM_009643    | 1.36764e-006 | -1.85682 | E11.5 * Wnt1 down vs E11.5 * Ctrl |
| 10467041 Asah2         | NM_018830    | 1.27414e-007 | -1.85711 | E11.5 * Wnt1 down vs E11.5 * Ctrl |
| 10435697 Popdc2        | NM_001081984 | 9.59008e-006 | -1.85812 | E11.5 * Wnt1 down vs E11.5 * Ctrl |
| 10586718 9530091C08Rik | NM_177159    | 0.00154169   | -1.85878 | E11.5 * Wnt1 down vs E11.5 * Ctrl |
| 10543273 Cttnbp2       | NM_080285    | 8.67488e-006 | -1.85891 | E11.5 * Wnt1 down vs E11.5 * Ctrl |
| 10472757 Cybrd1        | NM_028593    | 1.2533e-006  | -1.85995 | E11.5 * Wnt1 down vs E11.5 * Ctrl |
| 10467258 Myof          | NM_001099634 | 1.57636e-007 | -1.86009 | E11.5 * Wnt1 down vs E11.5 * Ctrl |
| 10521678 Cd38          | NM_007646    | 1.41287e-007 | -1.86123 | E11.5 * Wnt1 down vs E11.5 * Ctrl |
| 10455647 Tnfaip8       | NM_134131    | 8.1793e-005  | -1.86208 | E11.5 * Wnt1 down vs E11.5 * Ctrl |
| 10389022 Myo1d         | NM_177390    | 0.000161153  | -1.86319 | E11.5 * Wnt1 down vs E11.5 * Ctrl |
| 10441791 D17Ertd663e   | ENSMUST00000 | 1.59824e-007 | -1.86565 | E11.5 * Wnt1 down vs E11.5 * Ctrl |
| 10538305 5730596B20Rik | ENSMUST00000 | 3.62556e-005 | -1.86617 | E11.5 * Wnt1 down vs E11.5 * Ctrl |
| 10403743 Inhba         | NM_008380    | 1.84229e-005 | -1.86625 | E11.5 * Wnt1 down vs E11.5 * Ctrl |
| 10502830 Nexn          | NM_199465    | 5.69293e-005 | -1.86969 | E11.5 * Wnt1 down vs E11.5 * Ctrl |
| 10436596 2810055G20Rik | ENSMUST00000 | 1.98306e-005 | -1.87087 | E11.5 * Wnt1 down vs E11.5 * Ctrl |
| 10496971 Asb17         | NM_025758    | 2.63652e-007 | -1.87148 | E11.5 * Wnt1 down vs E11.5 * Ctrl |
| 10570855 Plat          | NM_008872    | 3.01818e-005 | -1.87199 | E11.5 * Wnt1 down vs E11.5 * Ctrl |
| 10345212 Khdrbs2       | NM_133235    | 2.01459e-005 | -1.87209 | E11.5 * Wnt1 down vs E11.5 * Ctrl |
| 10521759 Slit2         | NM_178804    | 2.20035e-007 | -1.87487 | E11.5 * Wnt1 down vs E11.5 * Ctrl |
| 10570894 Ank1          | NM_001110783 | 1.73048e-010 | -1.87549 | E11.5 * Wnt1 down vs E11.5 * Ctrl |
| 10353309 Jph1          | AK081751     | 0.00290821   | -1.87586 | E11.5 * Wnt1 down vs E11.5 * Ctrl |
| 10473384 Slc43a3       | NM_021398    | 4.38595e-007 | -1.87799 | E11.5 * Wnt1 down vs E11.5 * Ctrl |
| 10500335 Fcgr1         | NM_010186    | 1.25956e-005 | -1.87854 | E11.5 * Wnt1 down vs E11.5 * Ctrl |
| 10442087 4930546H06Rik | BC171984     | 1.69179e-005 | -1.87909 | E11.5 * Wnt1 down vs E11.5 * Ctrl |
| 10549108 Abcc9         | NM_021041    | 7.28407e-007 | -1.88054 | E11.5 * Wnt1 down vs E11.5 * Ctrl |
| 10531191 Adamts3       | NM_001081401 | 0.00167836   | -1.88102 | E11.5 * Wnt1 down vs E11.5 * Ctrl |
| 10410931 Vcan          | NM_001081249 | 1.28899e-006 | -1.8815  | E11.5 * Wnt1 down vs E11.5 * Ctrl |
| 10458303 Ecscr         | NM_001033141 | 4.20052e-007 | -1.88167 | E11.5 * Wnt1 down vs E11.5 * Ctrl |
| 10505674 Cntln         | NM_175275    | 1.33214e-010 | -1.88358 | E11.5 * Wnt1 down vs E11.5 * Ctrl |
| 10423568 5730407I07Rik | ENSMUST00000 | 3.25357e-005 | -1.88597 | E11.5 * Wnt1 down vs E11.5 * Ctrl |
| 10568024 Coro1a        | NM_009898    | 2.3142e-007  | -1.88604 | E11.5 * Wnt1 down vs E11.5 * Ctrl |
| 10521622 4833430A08Rik | AK076499     | 9.98604e-005 | -1.88703 | E11.5 * Wnt1 down vs E11.5 * Ctrl |
| 10543791 Podxl         | NM_013723    | 3.42499e-006 | -1.88876 | E11.5 * Wnt1 down vs E11.5 * Ctrl |
| 10494114 Selenbp1      | NM_009150    | 6.95181e-005 | -1.8889  | E11.5 * Wnt1 down vs E11.5 * Ctrl |
| 10362102 ENSMUSG0000C  | ENSMUST00000 | 7.15058e-006 | -1.88932 | E11.5 * Wnt1 down vs E11.5 * Ctrl |
| 10406504 Edil3         | NM_001037987 | 0.000254302  | -1.8898  | E11.5 * Wnt1 down vs E11.5 * Ctrl |
| 10462853 Cyp26a1       | NM_007811    | 2.61185e-007 | -1.88996 | E11.5 * Wnt1 down vs E11.5 * Ctrl |
| 10435961 ENSMUSG0000C  | ENSMUST00000 | 6.55673e-006 | -1.89107 | E11.5 * Wnt1 down vs E11.5 * Ctrl |
| 10579054 4930467E23Rik | ENSMUST00000 | 0.00170446   | -1.89122 | E11.5 * Wnt1 down vs E11.5 * Ctrl |
| 10418410 Prkcd         | NM_011103    | 1.56725e-006 | -1.8913  | E11.5 * Wnt1 down vs E11.5 * Ctrl |
| 10499870 Lor           | NM_008508    | 0.00107431   | -1.89133 | E11.5 * Wnt1 down vs E11.5 * Ctrl |
| 10579958 Il15          | NM_008357    | 1.30605e-006 | -1.89153 | E11.5 * Wnt1 down vs E11.5 * Ctrl |
| 10361926 Map3k5        | NM_008580    | 1.16412e-005 | -1.89374 | E11.5 * Wnt1 down vs E11.5 * Ctrl |
| 10476021 Sirpa         | NM_007547    | 3.15103e-007 | -1.89761 | E11.5 * Wnt1 down vs E11.5 * Ctrl |
| 10599696 Ddx26b        | NM_172779    | 3.52616e-006 | -1.89809 | E11.5 * Wnt1 down vs E11.5 * Ctrl |
| 10478936               | ---          | 0.0057427    | -1.899   | E11.5 * Wnt1 down vs E11.5 * Ctrl |
| 10519747 Sema3e        | NM_011348    | 2.51608e-006 | -1.8993  | E11.5 * Wnt1 down vs E11.5 * Ctrl |
| 10433492 Atf7ip2       | NM_153123    | 6.94933e-006 | -1.9011  | E11.5 * Wnt1 down vs E11.5 * Ctrl |
| 10544089 Zc3hav1       | NM_028421    | 6.58369e-008 | -1.90289 | E11.5 * Wnt1 down vs E11.5 * Ctrl |
| 10455721 Sncap         | NM_026408    | 4.35315e-005 | -1.90665 | E11.5 * Wnt1 down vs E11.5 * Ctrl |
| 10441787 2810051F02Rik | BC009123     | 3.34807e-007 | -1.90665 | E11.5 * Wnt1 down vs E11.5 * Ctrl |
| 10419465 Ccnb1ip1      | NM_001111119 | 1.09297e-006 | -1.90802 | E11.5 * Wnt1 down vs E11.5 * Ctrl |
| 10577361               |              | 9.50167e-005 | -1.90886 | E11.5 * Wnt1 down vs E11.5 * Ctrl |
| 10556076 Olfm1         | NM_172907    | 5.82618e-005 | -1.90906 | E11.5 * Wnt1 down vs E11.5 * Ctrl |
| 10406905 Ccdc125       | NM_183115    | 5.71324e-005 | -1.91157 | E11.5 * Wnt1 down vs E11.5 * Ctrl |
| 10513101               | ---          | 0.000831376  | -1.91433 | E11.5 * Wnt1 down vs E11.5 * Ctrl |
| 10398442               | ---          | 0.00201556   | -1.91728 | E11.5 * Wnt1 down vs E11.5 * Ctrl |
| 10353213 Msc           | NM_010827    | 9.87286e-006 | -1.9174  | E11.5 * Wnt1 down vs E11.5 * Ctrl |
| 10530615 Ociad2        | NM_026950    | 0.000342865  | -1.92149 | E11.5 * Wnt1 down vs E11.5 * Ctrl |
| 10577388 4930467E23Rik | ENSMUST00000 | 0.000619967  | -1.92373 | E11.5 * Wnt1 down vs E11.5 * Ctrl |
| 10600857 Heph          | NM_010417    | 4.38927e-006 | -1.92756 | E11.5 * Wnt1 down vs E11.5 * Ctrl |
| 10368598 Rlbp112       | NM_175448    | 7.53567e-005 | -1.92913 | E11.5 * Wnt1 down vs E11.5 * Ctrl |
| 10464251 Atrnl1        | NM_181415    | 3.78295e-007 | -1.93121 | E11.5 * Wnt1 down vs E11.5 * Ctrl |
| 10418506 Stab1         | NM_138672    | 1.14029e-008 | -1.93209 | E11.5 * Wnt1 down vs E11.5 * Ctrl |
| 10344750 Sgk3          | NM_133220    | 0.000651917  | -1.93224 | E11.5 * Wnt1 down vs E11.5 * Ctrl |
| 10352143 D230039L06Rik | NM_177724    | 2.0761e-006  | -1.93229 | E11.5 * Wnt1 down vs E11.5 * Ctrl |

|          |               |              |              |          |                                   |
|----------|---------------|--------------|--------------|----------|-----------------------------------|
| 10531193 | Adamts3       | NM_001081401 | 2.91195e-005 | -1.93302 | E11.5 * Wnt1 down vs E11.5 * Ctrl |
| 10476321 | Prnd          | NM_023043    | 5.71504e-005 | -1.93348 | E11.5 * Wnt1 down vs E11.5 * Ctrl |
| 10456046 | Pdgrb         | NM_001146268 | 1.11177e-005 | -1.93478 | E11.5 * Wnt1 down vs E11.5 * Ctrl |
| 10528815 | 5031410I06Rik | NM_207657    | 8.57319e-008 | -1.93707 | E11.5 * Wnt1 down vs E11.5 * Ctrl |
| 10590031 | Itga9         | NM_133721    | 5.29917e-006 | -1.94145 | E11.5 * Wnt1 down vs E11.5 * Ctrl |
| 10582466 | Sult5a1       | NM_020564    | 1.3499e-007  | -1.94228 | E11.5 * Wnt1 down vs E11.5 * Ctrl |
| 10471721 | Ptgs1         | NM_008969    | 7.62951e-008 | -1.94324 | E11.5 * Wnt1 down vs E11.5 * Ctrl |
| 10493820 | S100a6        | NM_011313    | 0.000199498  | -1.94602 | E11.5 * Wnt1 down vs E11.5 * Ctrl |
| 10505489 | Pappa         | NM_021362    | 6.77817e-007 | -1.94741 | E11.5 * Wnt1 down vs E11.5 * Ctrl |
| 10440091 | Col8a1        | NM_007739    | 0.000471278  | -1.94948 | E11.5 * Wnt1 down vs E11.5 * Ctrl |
| 10355806 | Tuba4a        | NM_009447    | 5.75536e-007 | -1.95081 | E11.5 * Wnt1 down vs E11.5 * Ctrl |
| 10492888 | ---           | ---          | 1.95123e-005 | -1.95121 | E11.5 * Wnt1 down vs E11.5 * Ctrl |
| 10384423 | Cobl          | NM_172496    | 1.83618e-007 | -1.9517  | E11.5 * Wnt1 down vs E11.5 * Ctrl |
| 10492428 | Tiparp        | NM_178892    | 1.30541e-007 | -1.95356 | E11.5 * Wnt1 down vs E11.5 * Ctrl |
| 10591120 | Fat3          | NM_001080814 | 6.5071e-006  | -1.95493 | E11.5 * Wnt1 down vs E11.5 * Ctrl |
| 10581605 | Hp            | NM_017370    | 0.000144051  | -1.95867 | E11.5 * Wnt1 down vs E11.5 * Ctrl |
| 10528810 | Speer4a       | NM_029376    | 1.55349e-008 | -1.96151 | E11.5 * Wnt1 down vs E11.5 * Ctrl |
| 10500283 | Car14         | NM_011797    | 1.87364e-006 | -1.96797 | E11.5 * Wnt1 down vs E11.5 * Ctrl |
| 10372293 | EG628870      | XM_893664    | 1.08143e-009 | -1.96945 | E11.5 * Wnt1 down vs E11.5 * Ctrl |
| 10367591 | Myct1         | NM_026793    | 0.000113622  | -1.97231 | E11.5 * Wnt1 down vs E11.5 * Ctrl |
| 10570634 | 4930467E23Rik | ENSMUST00000 | 0.0013271    | -1.97364 | E11.5 * Wnt1 down vs E11.5 * Ctrl |
| 10344935 | Kcnb2         | NM_001098528 | 1.35521e-005 | -1.97366 | E11.5 * Wnt1 down vs E11.5 * Ctrl |
| 10554863 | Syt12         | NM_001040085 | 5.59699e-006 | -1.97396 | E11.5 * Wnt1 down vs E11.5 * Ctrl |
| 10604576 | Gpc3          | NM_016697    | 3.59754e-006 | -1.97508 | E11.5 * Wnt1 down vs E11.5 * Ctrl |
| 10491414 | Usp13         | NM_001013024 | 2.12689e-006 | -1.97564 | E11.5 * Wnt1 down vs E11.5 * Ctrl |
| 10374727 | Bcl11a        | NM_016707    | 3.28584e-007 | -1.97582 | E11.5 * Wnt1 down vs E11.5 * Ctrl |
| 10545401 | Vamp5         | NM_016872    | 6.66253e-007 | -1.97694 | E11.5 * Wnt1 down vs E11.5 * Ctrl |
| 10513774 | ---           | ---          | 1.1735e-005  | -1.97796 | E11.5 * Wnt1 down vs E11.5 * Ctrl |
| 10575548 | ---           | ---          | 0.00027785   | -1.9786  | E11.5 * Wnt1 down vs E11.5 * Ctrl |
| 10356995 | ---           | ---          | 7.05572e-005 | -1.97946 | E11.5 * Wnt1 down vs E11.5 * Ctrl |
| 10502890 | St6galnac3    | NM_011372    | 8.61844e-008 | -1.98314 | E11.5 * Wnt1 down vs E11.5 * Ctrl |
| 10368409 | Lama2         | NM_008481    | 9.2235e-010  | -1.98841 | E11.5 * Wnt1 down vs E11.5 * Ctrl |
| 10600852 | ---           | ---          | 7.94644e-006 | -1.98848 | E11.5 * Wnt1 down vs E11.5 * Ctrl |
| 10560242 | C5ar1         | NM_007577    | 5.83031e-005 | -1.98857 | E11.5 * Wnt1 down vs E11.5 * Ctrl |
| 10398356 | ---           | ---          | 1.5103e-005  | -1.98876 | E11.5 * Wnt1 down vs E11.5 * Ctrl |
| 10544774 | Hoxa6         | NM_010454    | 3.90605e-006 | -1.98913 | E11.5 * Wnt1 down vs E11.5 * Ctrl |
| 10433274 | Vasn          | NM_139307    | 4.3576e-006  | -1.99158 | E11.5 * Wnt1 down vs E11.5 * Ctrl |
| 10415396 | Nfatc4        | NM_023699    | 2.46883e-006 | -1.99178 | E11.5 * Wnt1 down vs E11.5 * Ctrl |
| 10441003 | Runx1         | NM_001111023 | 5.65597e-006 | -1.99402 | E11.5 * Wnt1 down vs E11.5 * Ctrl |
| 10603346 | Plp2          | NM_019755    | 2.83758e-006 | -1.99521 | E11.5 * Wnt1 down vs E11.5 * Ctrl |
| 10427280 | Hoxc10        | NM_010462    | 8.66921e-007 | -1.99624 | E11.5 * Wnt1 down vs E11.5 * Ctrl |
| 10495976 | Pitx2         | NM_011098    | 6.65648e-008 | -2.00029 | E11.5 * Wnt1 down vs E11.5 * Ctrl |
| 10533401 | Cux2          | ENSMUST00000 | 2.20093e-006 | -2.0031  | E11.5 * Wnt1 down vs E11.5 * Ctrl |
| 10352150 | ---           | ---          | 8.83246e-007 | -2.00419 | E11.5 * Wnt1 down vs E11.5 * Ctrl |
| 10497608 | Mds1          | NM_021442    | 1.04276e-005 | -2.00515 | E11.5 * Wnt1 down vs E11.5 * Ctrl |
| 10390746 | ---           | ---          | 5.89195e-005 | -2.00707 | E11.5 * Wnt1 down vs E11.5 * Ctrl |
| 10354677 | Ankrd44       | NM_001081433 | 1.19703e-006 | -2.00722 | E11.5 * Wnt1 down vs E11.5 * Ctrl |
| 10587733 | Ctsh          | NM_007801    | 3.84576e-005 | -2.00733 | E11.5 * Wnt1 down vs E11.5 * Ctrl |
| 10513166 | Ptpn3         | NM_011207    | 1.28899e-006 | -2.00797 | E11.5 * Wnt1 down vs E11.5 * Ctrl |
| 10473022 | Plp2          | NM_019755    | 5.6776e-005  | -2.00895 | E11.5 * Wnt1 down vs E11.5 * Ctrl |
| 10599174 | Il13ra1       | NM_133990    | 8.74662e-008 | -2.00932 | E11.5 * Wnt1 down vs E11.5 * Ctrl |
| 10389025 | Myo1d         | NM_177390    | 7.36587e-005 | -2.01076 | E11.5 * Wnt1 down vs E11.5 * Ctrl |
| 10358421 | Rgs18         | NM_022881    | 4.91323e-008 | -2.01542 | E11.5 * Wnt1 down vs E11.5 * Ctrl |
| 10538842 | Gng12         | NM_025278    | 5.40377e-009 | -2.01894 | E11.5 * Wnt1 down vs E11.5 * Ctrl |
| 10605493 | Prrg1         | BC032926     | 8.10391e-007 | -2.02272 | E11.5 * Wnt1 down vs E11.5 * Ctrl |
| 10366052 | Kitl          | NM_013598    | 4.48495e-007 | -2.02368 | E11.5 * Wnt1 down vs E11.5 * Ctrl |
| 10406928 | Cd180         | NM_008533    | 1.2412e-005  | -2.02579 | E11.5 * Wnt1 down vs E11.5 * Ctrl |
| 10355500 | Igfbp5        | NM_010518    | 4.08631e-005 | -2.02618 | E11.5 * Wnt1 down vs E11.5 * Ctrl |
| 10427297 | Hoxc5         | NM_175730    | 3.38347e-008 | -2.02624 | E11.5 * Wnt1 down vs E11.5 * Ctrl |
| 10466606 | Anxa1         | NM_010730    | 0.00261137   | -2.02905 | E11.5 * Wnt1 down vs E11.5 * Ctrl |
| 10565712 | Acer3         | NM_025408    | 1.52847e-006 | -2.03464 | E11.5 * Wnt1 down vs E11.5 * Ctrl |
| 10579060 | 4930467E23Rik | ENSMUST00000 | 0.00115191   | -2.03564 | E11.5 * Wnt1 down vs E11.5 * Ctrl |
| 10344990 | Crispld1      | NM_031402    | 3.31043e-009 | -2.03578 | E11.5 * Wnt1 down vs E11.5 * Ctrl |
| 10430555 | Dmc1          | NM_010059    | 0.000144473  | -2.03927 | E11.5 * Wnt1 down vs E11.5 * Ctrl |
| 10438708 | Masp1         | NM_008555    | 1.24858e-005 | -2.04713 | E11.5 * Wnt1 down vs E11.5 * Ctrl |
| 10472962 | Hoxd9         | NM_013555    | 5.60707e-005 | -2.05094 | E11.5 * Wnt1 down vs E11.5 * Ctrl |

|                        |              |              |          |                                   |
|------------------------|--------------|--------------|----------|-----------------------------------|
| 10416004 Zfp395        | NM_199029    | 8.00604e-005 | -2.0516  | E11.5 * Wnt1 down vs E11.5 * Ctrl |
| 10409061               | ---          | 0.000982597  | -2.05338 | E11.5 * Wnt1 down vs E11.5 * Ctrl |
| 10458731 Mcc           | NM_001085373 | 2.57016e-008 | -2.05516 | E11.5 * Wnt1 down vs E11.5 * Ctrl |
| 10513145 Ptpn3         | NM_011207    | 4.59904e-005 | -2.05626 | E11.5 * Wnt1 down vs E11.5 * Ctrl |
| 10407281 Esm1          | NM_023612    | 1.18641e-007 | -2.05919 | E11.5 * Wnt1 down vs E11.5 * Ctrl |
| 10423902 Zfpm2         | NM_011766    | 6.66618e-006 | -2.06112 | E11.5 * Wnt1 down vs E11.5 * Ctrl |
| 10369752 Lrrtm3        | NM_178678    | 4.2513e-006  | -2.06121 | E11.5 * Wnt1 down vs E11.5 * Ctrl |
| 10419082 5730469M10Rik | BC056635     | 1.9283e-007  | -2.06835 | E11.5 * Wnt1 down vs E11.5 * Ctrl |
| 10457091 Neto1         | NM_144946    | 5.51224e-005 | -2.06903 | E11.5 * Wnt1 down vs E11.5 * Ctrl |
| 10506301 Lepr          | NM_001122899 | 1.71841e-007 | -2.07099 | E11.5 * Wnt1 down vs E11.5 * Ctrl |
| 10462237 Smarca2       | NM_011416    | 6.13635e-010 | -2.07202 | E11.5 * Wnt1 down vs E11.5 * Ctrl |
| 10462818 Hhex          | NM_008245    | 2.30653e-005 | -2.07204 | E11.5 * Wnt1 down vs E11.5 * Ctrl |
| 10345762 Il1r1         | NM_008362    | 1.98243e-006 | -2.07342 | E11.5 * Wnt1 down vs E11.5 * Ctrl |
| 10483046 Dpp4          | NM_010074    | 5.73463e-006 | -2.07422 | E11.5 * Wnt1 down vs E11.5 * Ctrl |
| 10606694 Btk           | NM_013482    | 6.82291e-006 | -2.07919 | E11.5 * Wnt1 down vs E11.5 * Ctrl |
| 10528794 5031410I06Rik | NM_207657    | 3.55658e-009 | -2.07953 | E11.5 * Wnt1 down vs E11.5 * Ctrl |
| 10523468 Bmp2k         | NM_080708    | 5.4416e-006  | -2.08279 | E11.5 * Wnt1 down vs E11.5 * Ctrl |
| 10433096 Nfe2          | NM_008685    | 3.66102e-008 | -2.08285 | E11.5 * Wnt1 down vs E11.5 * Ctrl |
| 10453759 ENSMUSG0000C  | ENSMUST00000 | 8.89652e-009 | -2.0834  | E11.5 * Wnt1 down vs E11.5 * Ctrl |
| 10487040 Fbn1          | NM_007993    | 3.37665e-007 | -2.08472 | E11.5 * Wnt1 down vs E11.5 * Ctrl |
| 10542355 Emp1          | NM_010128    | 1.37177e-005 | -2.08654 | E11.5 * Wnt1 down vs E11.5 * Ctrl |
| 10477600               | ---          | 1.04793e-008 | -2.08755 | E11.5 * Wnt1 down vs E11.5 * Ctrl |
| 10426315 Lrrk2         | NM_025730    | 1.69176e-008 | -2.08763 | E11.5 * Wnt1 down vs E11.5 * Ctrl |
| 10599581 2610018G03Rik | NM_133729    | 1.16659e-008 | -2.08834 | E11.5 * Wnt1 down vs E11.5 * Ctrl |
| 10447946 4930474M22Rik | BC089489     | 1.30824e-006 | -2.0965  | E11.5 * Wnt1 down vs E11.5 * Ctrl |
| 10513805 Dbc1          | NM_019967    | 3.94436e-007 | -2.09666 | E11.5 * Wnt1 down vs E11.5 * Ctrl |
| 10355403 Fn1           | NM_010233    | 1.467e-006   | -2.09881 | E11.5 * Wnt1 down vs E11.5 * Ctrl |
| 10506201 Ror1          | NM_013845    | 7.05972e-009 | -2.09895 | E11.5 * Wnt1 down vs E11.5 * Ctrl |
| 10506058 Inadl         | NM_172696    | 2.93759e-009 | -2.103   | E11.5 * Wnt1 down vs E11.5 * Ctrl |
| 10442327 Cldn6         | NM_018777    | 3.05167e-006 | -2.10357 | E11.5 * Wnt1 down vs E11.5 * Ctrl |
| 10546661 Foxp1         | NM_053202    | 1.52264e-008 | -2.10377 | E11.5 * Wnt1 down vs E11.5 * Ctrl |
| 10365559 Igf1          | NM_010512    | 1.28174e-006 | -2.10664 | E11.5 * Wnt1 down vs E11.5 * Ctrl |
| 10580033 Cd97          | NM_011925    | 1.21836e-005 | -2.1068  | E11.5 * Wnt1 down vs E11.5 * Ctrl |
| 10570957 Sfrp1         | NM_013834    | 7.88289e-006 | -2.10732 | E11.5 * Wnt1 down vs E11.5 * Ctrl |
| 10436304 Abi3bp        | NM_001014423 | 6.36069e-007 | -2.1077  | E11.5 * Wnt1 down vs E11.5 * Ctrl |
| 10384656 B3gnt2        | NM_016888    | 2.35998e-006 | -2.11078 | E11.5 * Wnt1 down vs E11.5 * Ctrl |
| 10453394 Six2          | NM_011380    | 7.35907e-008 | -2.11321 | E11.5 * Wnt1 down vs E11.5 * Ctrl |
| 10352548 Slc30a10      | NM_001033286 | 7.79103e-007 | -2.11367 | E11.5 * Wnt1 down vs E11.5 * Ctrl |
| 10551736 Ppp1r14a      | NM_026731    | 0.000411349  | -2.11369 | E11.5 * Wnt1 down vs E11.5 * Ctrl |
| 10514255 Mlt3          | NM_027326    | 3.24409e-011 | -2.1148  | E11.5 * Wnt1 down vs E11.5 * Ctrl |
| 10419154 Ear1          | NM_007894    | 5.52756e-005 | -2.11599 | E11.5 * Wnt1 down vs E11.5 * Ctrl |
| 10502776 Lphn2         | NM_001081298 | 1.81486e-011 | -2.1163  | E11.5 * Wnt1 down vs E11.5 * Ctrl |
| 10502783 ENSMUSG0000C  | ENSMUST00000 | 8.77381e-005 | -2.11757 | E11.5 * Wnt1 down vs E11.5 * Ctrl |
| 10411359 Plp2          | NM_019755    | 4.31819e-006 | -2.11946 | E11.5 * Wnt1 down vs E11.5 * Ctrl |
| 10376950 Pmp22         | NM_008885    | 6.86352e-009 | -2.1196  | E11.5 * Wnt1 down vs E11.5 * Ctrl |
| 10490856 Raly1         | NM_178631    | 5.48495e-007 | -2.12008 | E11.5 * Wnt1 down vs E11.5 * Ctrl |
| 10532085 Tgfb3         | NM_011578    | 2.72064e-008 | -2.12401 | E11.5 * Wnt1 down vs E11.5 * Ctrl |
| 10479973 ENSMUSG0000C  | ENSMUST00000 | 0.0026049    | -2.12473 | E11.5 * Wnt1 down vs E11.5 * Ctrl |
| 10434806 Lpp           | NM_178665    | 1.75878e-006 | -2.12853 | E11.5 * Wnt1 down vs E11.5 * Ctrl |
| 10455112 Pcdhb17       | NM_053142    | 8.03472e-006 | -2.1323  | E11.5 * Wnt1 down vs E11.5 * Ctrl |
| 10537834 Arhgef5       | NM_133674    | 6.12774e-008 | -2.13677 | E11.5 * Wnt1 down vs E11.5 * Ctrl |
| 10475890 MERTK         | NM_008587    | 3.65412e-007 | -2.14011 | E11.5 * Wnt1 down vs E11.5 * Ctrl |
| 10455761 Prdm6         | NM_001033281 | 7.23654e-005 | -2.14232 | E11.5 * Wnt1 down vs E11.5 * Ctrl |
| 10540207 Adamts9       | ENSMUST00000 | 1.07167e-006 | -2.14337 | E11.5 * Wnt1 down vs E11.5 * Ctrl |
| 10545707 Actg2         | NM_009610    | 8.68694e-005 | -2.14536 | E11.5 * Wnt1 down vs E11.5 * Ctrl |
| 10398358               | ---          | 0.0012378    | -2.14614 | E11.5 * Wnt1 down vs E11.5 * Ctrl |
| 10502552 Clca1         | NM_009899    | 0.00016331   | -2.14674 | E11.5 * Wnt1 down vs E11.5 * Ctrl |
| 10398408               | ---          | 0.00150073   | -2.15633 | E11.5 * Wnt1 down vs E11.5 * Ctrl |
| 10605503               | ---          | 0.00629994   | -2.15858 | E11.5 * Wnt1 down vs E11.5 * Ctrl |
| 10396402 Prkch         | NM_008856    | 1.61708e-007 | -2.15962 | E11.5 * Wnt1 down vs E11.5 * Ctrl |
| 10445291               | ---          | 0.00013398   | -2.16203 | E11.5 * Wnt1 down vs E11.5 * Ctrl |
| 10478525 Wfdc2         | NM_026323    | 2.82723e-006 | -2.16267 | E11.5 * Wnt1 down vs E11.5 * Ctrl |
| 10465916 Gm98          | BC157942     | 3.73114e-007 | -2.16719 | E11.5 * Wnt1 down vs E11.5 * Ctrl |
| 10528207 Cd36          | NM_001159557 | 5.29422e-007 | -2.1696  | E11.5 * Wnt1 down vs E11.5 * Ctrl |
| 10398360               | ---          | 0.000230644  | -2.17602 | E11.5 * Wnt1 down vs E11.5 * Ctrl |
| 10592420 AW551984      | NM_178737    | 1.20593e-008 | -2.17645 | E11.5 * Wnt1 down vs E11.5 * Ctrl |

|          |               |              |              |          |                                   |
|----------|---------------|--------------|--------------|----------|-----------------------------------|
| 10583021 | Pdgfd         | NM_027924    | 5.65263e-006 | -2.17762 | E11.5 * Wnt1 down vs E11.5 * Ctrl |
| 10384504 | Meis1         | NM_010789    | 5.16064e-009 | -2.18513 | E11.5 * Wnt1 down vs E11.5 * Ctrl |
| 10514275 | Ptplad2       | NM_025760    | 5.00556e-006 | -2.18715 | E11.5 * Wnt1 down vs E11.5 * Ctrl |
| 10503334 | Gem           | NM_010276    | 2.02174e-005 | -2.18814 | E11.5 * Wnt1 down vs E11.5 * Ctrl |
| 10598507 | Slc38a5       | NM_172479    | 3.73385e-007 | -2.18903 | E11.5 * Wnt1 down vs E11.5 * Ctrl |
| 10372028 | Plxnc1        | NM_018797    | 5.13794e-009 | -2.19006 | E11.5 * Wnt1 down vs E11.5 * Ctrl |
| 10351546 | Apoa2         | NM_013474    | 0.00333965   | -2.19317 | E11.5 * Wnt1 down vs E11.5 * Ctrl |
| 10502766 | Lphn2         | NM_001081298 | 0.000640595  | -2.19383 | E11.5 * Wnt1 down vs E11.5 * Ctrl |
| 10368970 | Prdm1         | NM_007548    | 4.8063e-007  | -2.19394 | E11.5 * Wnt1 down vs E11.5 * Ctrl |
| 10392560 | Abca9         | NM_147220    | 1.35694e-008 | -2.19491 | E11.5 * Wnt1 down vs E11.5 * Ctrl |
| 10511429 | Car8          | NM_007592    | 2.26387e-006 | -2.19503 | E11.5 * Wnt1 down vs E11.5 * Ctrl |
| 10485643 | Al314831      | NR_015462    | 3.29077e-005 | -2.20558 | E11.5 * Wnt1 down vs E11.5 * Ctrl |
| 10360070 | Fcer1g        | NM_010185    | 4.29408e-006 | -2.20621 | E11.5 * Wnt1 down vs E11.5 * Ctrl |
| 10545409 | Vamp8         | NM_016794    | 1.36201e-006 | -2.2163  | E11.5 * Wnt1 down vs E11.5 * Ctrl |
| 10380637 | Hoxb6         | NM_008269    | 1.83716e-008 | -2.21649 | E11.5 * Wnt1 down vs E11.5 * Ctrl |
| 10574027 | Mt1           | NM_013602    | 4.2385e-005  | -2.21734 | E11.5 * Wnt1 down vs E11.5 * Ctrl |
| 10429128 | Sla           | NM_001029841 | 5.35088e-005 | -2.21812 | E11.5 * Wnt1 down vs E11.5 * Ctrl |
| 10400844 | Pygl          | NM_133198    | 5.14093e-008 | -2.22209 | E11.5 * Wnt1 down vs E11.5 * Ctrl |
| 10407122 | ---           | ---          | 0.00455997   | -2.22317 | E11.5 * Wnt1 down vs E11.5 * Ctrl |
| 10466210 | Ms4a6d        | NM_026835    | 2.38548e-007 | -2.22454 | E11.5 * Wnt1 down vs E11.5 * Ctrl |
| 10423556 | Pgcp          | NM_018755    | 2.50962e-007 | -2.22862 | E11.5 * Wnt1 down vs E11.5 * Ctrl |
| 10436392 | Cpox          | NM_007757    | 3.85056e-007 | -2.22891 | E11.5 * Wnt1 down vs E11.5 * Ctrl |
| 10590842 | ENSMUSG0000C  | ENSMUST00000 | 0.0026411    | -2.22909 | E11.5 * Wnt1 down vs E11.5 * Ctrl |
| 10434802 | Lpp           | BC005613     | 3.61892e-005 | -2.23068 | E11.5 * Wnt1 down vs E11.5 * Ctrl |
| 10415651 | Fgf9          | NM_013518    | 5.61352e-007 | -2.23275 | E11.5 * Wnt1 down vs E11.5 * Ctrl |
| 10601360 | Atp7a         | NM_001109757 | 1.4023e-009  | -2.23344 | E11.5 * Wnt1 down vs E11.5 * Ctrl |
| 10350840 | Angptl1       | NM_028333    | 1.88229e-006 | -2.24121 | E11.5 * Wnt1 down vs E11.5 * Ctrl |
| 10527638 | Alox5ap       | NM_009663    | 6.03301e-006 | -2.24582 | E11.5 * Wnt1 down vs E11.5 * Ctrl |
| 10366476 | Ptprb         | NM_029928    | 3.1343e-008  | -2.24639 | E11.5 * Wnt1 down vs E11.5 * Ctrl |
| 10427904 | Fbxl7         | BC050864     | 5.4879e-006  | -2.24703 | E11.5 * Wnt1 down vs E11.5 * Ctrl |
| 10367822 | Rab32         | NM_026405    | 7.78561e-006 | -2.24979 | E11.5 * Wnt1 down vs E11.5 * Ctrl |
| 10498972 | Rbm46         | NM_001146328 | 2.11134e-006 | -2.25632 | E11.5 * Wnt1 down vs E11.5 * Ctrl |
| 10406519 | Hapln1        | NM_013500    | 7.14686e-006 | -2.25724 | E11.5 * Wnt1 down vs E11.5 * Ctrl |
| 10544768 | Hoxa5         | NM_010453    | 3.11037e-005 | -2.25731 | E11.5 * Wnt1 down vs E11.5 * Ctrl |
| 10548761 | Hebp1         | NM_013546    | 2.81067e-006 | -2.26057 | E11.5 * Wnt1 down vs E11.5 * Ctrl |
| 10359861 | Mgst3         | NM_025569    | 3.25186e-006 | -2.26076 | E11.5 * Wnt1 down vs E11.5 * Ctrl |
| 10529875 | Ldb2          | NM_001077398 | 2.63993e-007 | -2.26221 | E11.5 * Wnt1 down vs E11.5 * Ctrl |
| 10424140 | Col14a1       | NM_181277    | 1.17642e-006 | -2.27948 | E11.5 * Wnt1 down vs E11.5 * Ctrl |
| 10502863 | Ak5           | NM_001081277 | 4.7413e-008  | -2.28025 | E11.5 * Wnt1 down vs E11.5 * Ctrl |
| 10463070 | Entpd1        | NM_009848    | 3.06238e-005 | -2.28044 | E11.5 * Wnt1 down vs E11.5 * Ctrl |
| 10563441 | Emp3          | NM_010129    | 5.83508e-007 | -2.28096 | E11.5 * Wnt1 down vs E11.5 * Ctrl |
| 10542594 | ENSMUSG0000C  | AY512955     | 4.68094e-006 | -2.28126 | E11.5 * Wnt1 down vs E11.5 * Ctrl |
| 10362113 | ENSMUSG0000C  | ENSMUST00000 | 4.16025e-006 | -2.28643 | E11.5 * Wnt1 down vs E11.5 * Ctrl |
| 10519998 | Lrrc17        | NM_028977    | 4.51076e-008 | -2.28843 | E11.5 * Wnt1 down vs E11.5 * Ctrl |
| 10498018 | Pcdh18        | NM_130448    | 2.40042e-009 | -2.28987 | E11.5 * Wnt1 down vs E11.5 * Ctrl |
| 10527713 | Rxfp2         | NM_080468    | 1.95994e-010 | -2.29008 | E11.5 * Wnt1 down vs E11.5 * Ctrl |
| 10418355 | Cacna1d       | NM_028981    | 1.20216e-009 | -2.30064 | E11.5 * Wnt1 down vs E11.5 * Ctrl |
| 10583529 | Icam4         | NM_023892    | 1.19746e-008 | -2.30116 | E11.5 * Wnt1 down vs E11.5 * Ctrl |
| 10463428 | ---           | ---          | 0.000518766  | -2.30867 | E11.5 * Wnt1 down vs E11.5 * Ctrl |
| 10413482 | Wnt5a         | NM_009524    | 2.43138e-005 | -2.30904 | E11.5 * Wnt1 down vs E11.5 * Ctrl |
| 10408525 | 1700018A04Rik | ENSMUST00000 | 1.30636e-007 | -2.30922 | E11.5 * Wnt1 down vs E11.5 * Ctrl |
| 10495794 | Pde5a         | NM_153422    | 4.82148e-012 | -2.31032 | E11.5 * Wnt1 down vs E11.5 * Ctrl |
| 10379530 | Ccl12         | NM_011331    | 1.75093e-006 | -2.31325 | E11.5 * Wnt1 down vs E11.5 * Ctrl |
| 10502748 | Lphn2         | NM_001081298 | 3.47359e-010 | -2.31357 | E11.5 * Wnt1 down vs E11.5 * Ctrl |
| 10453049 | Cdc42ep3      | NM_026514    | 6.67103e-006 | -2.31523 | E11.5 * Wnt1 down vs E11.5 * Ctrl |
| 10576046 | Foxf1a        | NM_010426    | 1.79001e-005 | -2.31945 | E11.5 * Wnt1 down vs E11.5 * Ctrl |
| 10591135 | Fat3          | NM_001080814 | 2.0393e-005  | -2.32139 | E11.5 * Wnt1 down vs E11.5 * Ctrl |
| 10537849 | Arhgef5       | NM_133674    | 5.25302e-008 | -2.32242 | E11.5 * Wnt1 down vs E11.5 * Ctrl |
| 10529824 | Prom1         | NM_008935    | 2.9028e-010  | -2.32287 | E11.5 * Wnt1 down vs E11.5 * Ctrl |
| 10523579 | Arhgap24      | NM_029270    | 1.26643e-009 | -2.323   | E11.5 * Wnt1 down vs E11.5 * Ctrl |
| 10440099 | St3gal6       | NM_018784    | 1.12273e-007 | -2.32479 | E11.5 * Wnt1 down vs E11.5 * Ctrl |
| 10506031 | Nfia          | NM_010905    | 2.79533e-006 | -2.32621 | E11.5 * Wnt1 down vs E11.5 * Ctrl |
| 10485840 | Ryr3          | NM_177652    | 1.86606e-011 | -2.33295 | E11.5 * Wnt1 down vs E11.5 * Ctrl |
| 10376778 | Mfap4         | NM_029568    | 9.8852e-008  | -2.33311 | E11.5 * Wnt1 down vs E11.5 * Ctrl |
| 10578880 | Tll1          | NM_009390    | 2.56765e-006 | -2.33455 | E11.5 * Wnt1 down vs E11.5 * Ctrl |
| 10583809 | Cnn1          | NM_009922    | 9.67663e-005 | -2.3347  | E11.5 * Wnt1 down vs E11.5 * Ctrl |

|                        |              |              |          |                                   |
|------------------------|--------------|--------------|----------|-----------------------------------|
| 10549420 Tmtc1         | NM_198967    | 1.41288e-008 | -2.33494 | E11.5 * Wnt1 down vs E11.5 * Ctrl |
| 10513362 OTTMUSG00000  | ENSMUST00000 | 1.77662e-008 | -2.3396  | E11.5 * Wnt1 down vs E11.5 * Ctrl |
| 10502778 Lphn2         | NM_001081298 | 1.14636e-006 | -2.34363 | E11.5 * Wnt1 down vs E11.5 * Ctrl |
| 10601980 Mum1l1        | NM_175541    | 5.07211e-006 | -2.3442  | E11.5 * Wnt1 down vs E11.5 * Ctrl |
| 10351867 Aim2          | NM_001013779 | 3.7998e-005  | -2.34775 | E11.5 * Wnt1 down vs E11.5 * Ctrl |
| 10592067 Fli1          | NM_008026    | 6.65034e-007 | -2.34968 | E11.5 * Wnt1 down vs E11.5 * Ctrl |
| 10402390 Serpina1b     | NM_009244    | 0.00302558   | -2.35125 | E11.5 * Wnt1 down vs E11.5 * Ctrl |
| 10584593               | ---          | 2.84458e-005 | -2.35457 | E11.5 * Wnt1 down vs E11.5 * Ctrl |
| 10568392 Rgs10         | NM_026418    | 3.19237e-009 | -2.36699 | E11.5 * Wnt1 down vs E11.5 * Ctrl |
| 10599680 3830403N18Rik | NM_027510    | 1.08763e-007 | -2.37282 | E11.5 * Wnt1 down vs E11.5 * Ctrl |
| 10484389 Tfpi          | NM_011576    | 8.19091e-011 | -2.37722 | E11.5 * Wnt1 down vs E11.5 * Ctrl |
| 10601993 D330045A20Rik | NM_175326    | 1.29904e-006 | -2.37879 | E11.5 * Wnt1 down vs E11.5 * Ctrl |
| 10501802 Tmem56        | NM_178936    | 4.71898e-008 | -2.37913 | E11.5 * Wnt1 down vs E11.5 * Ctrl |
| 10531197 Adamts3       | NM_001081401 | 5.30789e-007 | -2.3836  | E11.5 * Wnt1 down vs E11.5 * Ctrl |
| 10346015 Col3a1        | NM_009930    | 3.56884e-008 | -2.38811 | E11.5 * Wnt1 down vs E11.5 * Ctrl |
| 10474295 Wt1           | NM_144783    | 2.4701e-008  | -2.39126 | E11.5 * Wnt1 down vs E11.5 * Ctrl |
| 10497590 Evi1          | NM_007963    | 3.02564e-006 | -2.39973 | E11.5 * Wnt1 down vs E11.5 * Ctrl |
| 10519983 Fgl2          | NM_008013    | 2.34571e-007 | -2.40814 | E11.5 * Wnt1 down vs E11.5 * Ctrl |
| 10544487 Tpk1          | NM_013861    | 5.40514e-006 | -2.40876 | E11.5 * Wnt1 down vs E11.5 * Ctrl |
| 10406736 F2rl2         | NM_010170    | 1.07277e-006 | -2.41016 | E11.5 * Wnt1 down vs E11.5 * Ctrl |
| 10527959               | ---          | 5.38144e-005 | -2.412   | E11.5 * Wnt1 down vs E11.5 * Ctrl |
| 10360040 Fcgr3         | NM_010188    | 5.52664e-008 | -2.41449 | E11.5 * Wnt1 down vs E11.5 * Ctrl |
| 10604528 Mbnl3         | NM_134163    | 6.81571e-007 | -2.4147  | E11.5 * Wnt1 down vs E11.5 * Ctrl |
| 10500276 BC028528      | BC028528     | 2.14432e-009 | -2.4154  | E11.5 * Wnt1 down vs E11.5 * Ctrl |
| 10549877               | ---          | 3.62346e-006 | -2.41754 | E11.5 * Wnt1 down vs E11.5 * Ctrl |
| 10382106 Gm885         | NM_001033435 | 1.09894e-006 | -2.41942 | E11.5 * Wnt1 down vs E11.5 * Ctrl |
| 10530536 Tec           | NM_001113460 | 6.27302e-007 | -2.42189 | E11.5 * Wnt1 down vs E11.5 * Ctrl |
| 10447383 Epcam         | NM_008532    | 0.000142578  | -2.42395 | E11.5 * Wnt1 down vs E11.5 * Ctrl |
| 10357833 Atp2b4        | NM_213616    | 1.99487e-008 | -2.4254  | E11.5 * Wnt1 down vs E11.5 * Ctrl |
| 10581961 Adamts18      | NM_172466    | 3.83054e-007 | -2.42574 | E11.5 * Wnt1 down vs E11.5 * Ctrl |
| 10404649 Dsp           | NM_023842    | 1.4065e-007  | -2.42621 | E11.5 * Wnt1 down vs E11.5 * Ctrl |
| 10546434 Adamts9       | NM_175314    | 1.95122e-006 | -2.42811 | E11.5 * Wnt1 down vs E11.5 * Ctrl |
| 10363762 Tmem26        | NM_177794    | 4.28329e-008 | -2.43003 | E11.5 * Wnt1 down vs E11.5 * Ctrl |
| 10402705 Gm266         | NM_001033248 | 1.36527e-005 | -2.43196 | E11.5 * Wnt1 down vs E11.5 * Ctrl |
| 10517508 C1qb          | NM_009777    | 6.80175e-005 | -2.43267 | E11.5 * Wnt1 down vs E11.5 * Ctrl |
| 10577641 1810011O10Rik | NM_026931    | 7.66024e-005 | -2.43796 | E11.5 * Wnt1 down vs E11.5 * Ctrl |
| 10487011 Gatm          | NM_025961    | 4.97235e-009 | -2.43844 | E11.5 * Wnt1 down vs E11.5 * Ctrl |
| 10360398 Ifi202b       | NM_008327    | 0.000106147  | -2.44102 | E11.5 * Wnt1 down vs E11.5 * Ctrl |
| 10404404 Foxf2         | NM_010225    | 1.67824e-006 | -2.44284 | E11.5 * Wnt1 down vs E11.5 * Ctrl |
| 10398368               | ---          | 3.95509e-008 | -2.44745 | E11.5 * Wnt1 down vs E11.5 * Ctrl |
| 10413928 1810011H11Rik | AK007434     | 8.78762e-006 | -2.44883 | E11.5 * Wnt1 down vs E11.5 * Ctrl |
| 10492798 Sfrp2         | NM_009144    | 2.49894e-009 | -2.45444 | E11.5 * Wnt1 down vs E11.5 * Ctrl |
| 10440340               | ---          | 1.29541e-008 | -2.45972 | E11.5 * Wnt1 down vs E11.5 * Ctrl |
| 10525030 Tbx5          | NM_011537    | 2.93892e-007 | -2.46545 | E11.5 * Wnt1 down vs E11.5 * Ctrl |
| 10374366 Egfr          | NM_207655    | 1.22892e-007 | -2.4689  | E11.5 * Wnt1 down vs E11.5 * Ctrl |
| 10584561 9030425E11Rik | NM_133733    | 5.67544e-005 | -2.47412 | E11.5 * Wnt1 down vs E11.5 * Ctrl |
| 10433484 Atf7ip2       | NM_153123    | 2.94296e-005 | -2.47635 | E11.5 * Wnt1 down vs E11.5 * Ctrl |
| 10363696 D630028G08Rik | AK038706     | 5.79616e-007 | -2.47695 | E11.5 * Wnt1 down vs E11.5 * Ctrl |
| 10586118 Calml4        | NM_138304    | 0.000282019  | -2.477   | E11.5 * Wnt1 down vs E11.5 * Ctrl |
| 10454172 Dsg2          | NM_007883    | 4.42321e-007 | -2.47931 | E11.5 * Wnt1 down vs E11.5 * Ctrl |
| 10502240 Npnt          | NM_033525    | 2.0488e-007  | -2.4822  | E11.5 * Wnt1 down vs E11.5 * Ctrl |
| 10469457 Plxdc2        | NM_026162    | 4.41667e-011 | -2.48603 | E11.5 * Wnt1 down vs E11.5 * Ctrl |
| 10591125 Fat3          | NM_001080814 | 1.11501e-005 | -2.48678 | E11.5 * Wnt1 down vs E11.5 * Ctrl |
| 10362314 Ptprk         | NM_008983    | 3.86833e-010 | -2.48733 | E11.5 * Wnt1 down vs E11.5 * Ctrl |
| 10602372 Alas2         | NM_009653    | 1.16916e-009 | -2.48834 | E11.5 * Wnt1 down vs E11.5 * Ctrl |
| 10436600               | ---          | 0.0061147    | -2.49403 | E11.5 * Wnt1 down vs E11.5 * Ctrl |
| 10399801 Sntg2         | NM_172951    | 3.66041e-008 | -2.49419 | E11.5 * Wnt1 down vs E11.5 * Ctrl |
| 10460541 Cd248         | NM_054042    | 1.36141e-006 | -2.49651 | E11.5 * Wnt1 down vs E11.5 * Ctrl |
| 10559816               | ---          | 1.06849e-006 | -2.51315 | E11.5 * Wnt1 down vs E11.5 * Ctrl |
| 10502780 Lphn2         | NM_001081298 | 3.88934e-010 | -2.52121 | E11.5 * Wnt1 down vs E11.5 * Ctrl |
| 10407350 Fgf10         | NM_008002    | 4.29882e-007 | -2.52575 | E11.5 * Wnt1 down vs E11.5 * Ctrl |
| 10455919 Adamts19      | NM_175506    | 1.2756e-008  | -2.52608 | E11.5 * Wnt1 down vs E11.5 * Ctrl |
| 10564527 Nr2f2         | NM_009697    | 1.23268e-010 | -2.52785 | E11.5 * Wnt1 down vs E11.5 * Ctrl |
| 10358434 Pla2g4a       | NM_008869    | 4.64871e-007 | -2.52851 | E11.5 * Wnt1 down vs E11.5 * Ctrl |
| 10543306 Tspan12       | NM_173007    | 2.5793e-008  | -2.52851 | E11.5 * Wnt1 down vs E11.5 * Ctrl |
| 10351111 Dnm3os        | NR_002870    | 3.4148e-007  | -2.52876 | E11.5 * Wnt1 down vs E11.5 * Ctrl |

|          |               |               |              |          |                                   |
|----------|---------------|---------------|--------------|----------|-----------------------------------|
| 10501586 | S1pr1         | NM_007901     | 1.20034e-006 | -2.52886 | E11.5 * Wnt1 down vs E11.5 * Ctrl |
| 10587446 | Myo6          | NM_001039546  | 3.48142e-008 | -2.52891 | E11.5 * Wnt1 down vs E11.5 * Ctrl |
| 10398354 | ---           | ---           | 0.000140656  | -2.53208 | E11.5 * Wnt1 down vs E11.5 * Ctrl |
| 10595633 | Bcl2a1d       | NM_007536     | 3.37604e-007 | -2.53477 | E11.5 * Wnt1 down vs E11.5 * Ctrl |
| 10362294 | Arhgap18      | NM_176837     | 8.26903e-008 | -2.53631 | E11.5 * Wnt1 down vs E11.5 * Ctrl |
| 10536499 | Cav1          | NM_007616     | 5.3569e-005  | -2.53697 | E11.5 * Wnt1 down vs E11.5 * Ctrl |
| 10564818 | Anpep         | NM_008486     | 2.75021e-005 | -2.54143 | E11.5 * Wnt1 down vs E11.5 * Ctrl |
| 10398364 | ---           | ---           | 4.02793e-005 | -2.55172 | E11.5 * Wnt1 down vs E11.5 * Ctrl |
| 10502774 | Lphn2         | NM_001081298  | 1.68086e-011 | -2.55451 | E11.5 * Wnt1 down vs E11.5 * Ctrl |
| 10531195 | Adamts3       | NM_001081401  | 9.26187e-005 | -2.5568  | E11.5 * Wnt1 down vs E11.5 * Ctrl |
| 10521700 | ENSMUSG00000C | ENSMUST000000 | 0.000111521  | -2.55787 | E11.5 * Wnt1 down vs E11.5 * Ctrl |
| 10374333 | Ikzf1         | NM_001025597  | 4.57586e-008 | -2.55954 | E11.5 * Wnt1 down vs E11.5 * Ctrl |
| 10506820 | ---           | ---           | 0.000126003  | -2.56325 | E11.5 * Wnt1 down vs E11.5 * Ctrl |
| 10432918 | Krt8          | NM_031170     | 3.6308e-006  | -2.56375 | E11.5 * Wnt1 down vs E11.5 * Ctrl |
| 10372652 | Lyz1          | NM_013590     | 5.99831e-006 | -2.56939 | E11.5 * Wnt1 down vs E11.5 * Ctrl |
| 10571601 | Pdlim3        | NM_016798     | 5.7959e-009  | -2.58143 | E11.5 * Wnt1 down vs E11.5 * Ctrl |
| 10492689 | Pdgfc         | NM_019971     | 3.52005e-008 | -2.59002 | E11.5 * Wnt1 down vs E11.5 * Ctrl |
| 10351623 | F11r          | NM_172647     | 6.5183e-006  | -2.59078 | E11.5 * Wnt1 down vs E11.5 * Ctrl |
| 10587690 | Bcl2a1b       | NM_007534     | 4.34441e-007 | -2.59367 | E11.5 * Wnt1 down vs E11.5 * Ctrl |
| 10555297 | Kcne3         | NM_020574     | 7.82837e-009 | -2.5942  | E11.5 * Wnt1 down vs E11.5 * Ctrl |
| 10445046 | Trim10        | NM_011280     | 1.42908e-009 | -2.59984 | E11.5 * Wnt1 down vs E11.5 * Ctrl |
| 10535807 | Flt1          | NM_010228     | 1.40882e-011 | -2.59994 | E11.5 * Wnt1 down vs E11.5 * Ctrl |
| 10352152 | Kif26b        | NM_177757     | 6.05607e-008 | -2.60797 | E11.5 * Wnt1 down vs E11.5 * Ctrl |
| 10571788 | Vegfc         | NM_009506     | 1.70657e-006 | -2.61154 | E11.5 * Wnt1 down vs E11.5 * Ctrl |
| 10591116 | Fat3          | NM_001080814  | 5.64302e-009 | -2.61708 | E11.5 * Wnt1 down vs E11.5 * Ctrl |
| 10548038 | Ntf3          | NM_008742     | 8.37605e-007 | -2.62061 | E11.5 * Wnt1 down vs E11.5 * Ctrl |
| 10398362 | Rian          | AF357355      | 7.22833e-005 | -2.63144 | E11.5 * Wnt1 down vs E11.5 * Ctrl |
| 10531203 | Adamts3       | NM_001081401  | 1.17134e-007 | -2.63523 | E11.5 * Wnt1 down vs E11.5 * Ctrl |
| 10606016 | Il2rg         | NM_013563     | 3.68152e-006 | -2.6389  | E11.5 * Wnt1 down vs E11.5 * Ctrl |
| 10352867 | Plxna2        | NM_008882     | 7.65424e-010 | -2.63975 | E11.5 * Wnt1 down vs E11.5 * Ctrl |
| 10514177 | Bnc2          | NM_172870     | 2.77136e-008 | -2.63977 | E11.5 * Wnt1 down vs E11.5 * Ctrl |
| 10344837 | Prex2         | NM_029525     | 1.18566e-007 | -2.63994 | E11.5 * Wnt1 down vs E11.5 * Ctrl |
| 10475544 | Sema6d        | NM_199241     | 1.12484e-007 | -2.64264 | E11.5 * Wnt1 down vs E11.5 * Ctrl |
| 10541075 | Cxcl12        | NM_001012477  | 1.47866e-005 | -2.6563  | E11.5 * Wnt1 down vs E11.5 * Ctrl |
| 10435501 | Stfa1         | NM_001082543  | 7.06091e-007 | -2.66156 | E11.5 * Wnt1 down vs E11.5 * Ctrl |
| 10486664 | Epb4.2        | NM_013513     | 6.52076e-008 | -2.66343 | E11.5 * Wnt1 down vs E11.5 * Ctrl |
| 10400143 | Stxbp6        | NM_144552     | 1.92615e-008 | -2.664   | E11.5 * Wnt1 down vs E11.5 * Ctrl |
| 10523062 | Alb           | NM_009654     | 0.00338407   | -2.66824 | E11.5 * Wnt1 down vs E11.5 * Ctrl |
| 10515848 | Ermap         | NM_013848     | 2.46545e-009 | -2.66881 | E11.5 * Wnt1 down vs E11.5 * Ctrl |
| 10494548 | Gja5          | NM_008121     | 1.47841e-007 | -2.67139 | E11.5 * Wnt1 down vs E11.5 * Ctrl |
| 10543239 | Tcfec         | NM_031198     | 7.23033e-006 | -2.67165 | E11.5 * Wnt1 down vs E11.5 * Ctrl |
| 10591131 | Fat3          | NM_001080814  | 8.56749e-007 | -2.67299 | E11.5 * Wnt1 down vs E11.5 * Ctrl |
| 10559207 | Lsp1          | NM_019391     | 3.98028e-008 | -2.683   | E11.5 * Wnt1 down vs E11.5 * Ctrl |
| 10514070 | 2310067E19Rik | BC066147      | 4.16849e-007 | -2.69651 | E11.5 * Wnt1 down vs E11.5 * Ctrl |
| 10594044 | Islr          | NM_012043     | 3.68703e-007 | -2.70029 | E11.5 * Wnt1 down vs E11.5 * Ctrl |
| 10439500 | Upk1b         | NM_178924     | 4.33415e-005 | -2.70617 | E11.5 * Wnt1 down vs E11.5 * Ctrl |
| 10384458 | Plek          | NM_019549     | 1.01173e-006 | -2.70941 | E11.5 * Wnt1 down vs E11.5 * Ctrl |
| 10396936 | Smoc1         | NM_001146217  | 7.0494e-007  | -2.72149 | E11.5 * Wnt1 down vs E11.5 * Ctrl |
| 10501903 | Synpo2        | NM_080451     | 5.55181e-008 | -2.72276 | E11.5 * Wnt1 down vs E11.5 * Ctrl |
| 10412345 | Parp8         | NM_001081009  | 9.42949e-009 | -2.72703 | E11.5 * Wnt1 down vs E11.5 * Ctrl |
| 10453057 | Cyp1b1        | NM_009994     | 5.56259e-007 | -2.73613 | E11.5 * Wnt1 down vs E11.5 * Ctrl |
| 10587683 | Bcl2a1a       | NM_009742     | 5.69606e-006 | -2.73694 | E11.5 * Wnt1 down vs E11.5 * Ctrl |
| 10586744 | Anxa2         | NM_007585     | 6.4942e-006  | -2.74144 | E11.5 * Wnt1 down vs E11.5 * Ctrl |
| 10510239 | ENSMUSG00000C | ENSMUST000000 | 5.12468e-005 | -2.74162 | E11.5 * Wnt1 down vs E11.5 * Ctrl |
| 10584595 | 2610203C20Rik | ENSMUST000000 | 5.21345e-006 | -2.74277 | E11.5 * Wnt1 down vs E11.5 * Ctrl |
| 10604347 | Smarca1       | NM_053123     | 3.72519e-009 | -2.75041 | E11.5 * Wnt1 down vs E11.5 * Ctrl |
| 10566358 | Trim30        | NM_009099     | 9.75086e-007 | -2.75068 | E11.5 * Wnt1 down vs E11.5 * Ctrl |
| 10467840 | C130021O09Rik | AK081501      | 6.41758e-005 | -2.7507  | E11.5 * Wnt1 down vs E11.5 * Ctrl |
| 10578123 | Rbpms         | NM_019733     | 2.3642e-010  | -2.75414 | E11.5 * Wnt1 down vs E11.5 * Ctrl |
| 10436598 | 2810055G20Rik | ENSMUST000000 | 0.00185599   | -2.75503 | E11.5 * Wnt1 down vs E11.5 * Ctrl |
| 10597743 | Cx3cr1        | NM_009987     | 6.42699e-007 | -2.76766 | E11.5 * Wnt1 down vs E11.5 * Ctrl |
| 10446282 | Emr1          | NM_010130     | 7.65655e-007 | -2.76907 | E11.5 * Wnt1 down vs E11.5 * Ctrl |
| 10389231 | Ccl3          | NM_011337     | 1.0197e-005  | -2.77889 | E11.5 * Wnt1 down vs E11.5 * Ctrl |
| 10411235 | Iqgap2        | NM_027711     | 1.66969e-007 | -2.77902 | E11.5 * Wnt1 down vs E11.5 * Ctrl |
| 10453747 | Colec12       | NM_130449     | 1.16912e-007 | -2.78066 | E11.5 * Wnt1 down vs E11.5 * Ctrl |
| 10606355 | Cysl1r1       | NM_021476     | 3.13496e-008 | -2.78126 | E11.5 * Wnt1 down vs E11.5 * Ctrl |

|                        |               |              |          |                                   |
|------------------------|---------------|--------------|----------|-----------------------------------|
| 10559796 Peg3          | NM_008817     | 4.96487e-007 | -2.78931 | E11.5 * Wnt1 down vs E11.5 * Ctrl |
| 10461721 Mpeg1         | NM_010821     | 1.48653e-006 | -2.79224 | E11.5 * Wnt1 down vs E11.5 * Ctrl |
| 10344952 Rdh10         | NM_133832     | 2.46072e-005 | -2.80633 | E11.5 * Wnt1 down vs E11.5 * Ctrl |
| 10362091 Raet1d        | NM_020030     | 6.30845e-005 | -2.80796 | E11.5 * Wnt1 down vs E11.5 * Ctrl |
| 10458828 Cdo1          | NM_033037     | 4.20565e-009 | -2.80904 | E11.5 * Wnt1 down vs E11.5 * Ctrl |
| 10559649 Cox6b2        | NM_183405     | 7.01799e-006 | -2.81352 | E11.5 * Wnt1 down vs E11.5 * Ctrl |
| 10407286 BC067074      | ENSMUST000001 | 1.40267e-005 | -2.81742 | E11.5 * Wnt1 down vs E11.5 * Ctrl |
| 10467319 Rbp4          | NM_001159487  | 1.63838e-006 | -2.81852 | E11.5 * Wnt1 down vs E11.5 * Ctrl |
| 10536324 Asb4          | NM_023048     | 2.75767e-007 | -2.82069 | E11.5 * Wnt1 down vs E11.5 * Ctrl |
| 10427336 Nckap1l       | NM_153505     | 4.89254e-007 | -2.82712 | E11.5 * Wnt1 down vs E11.5 * Ctrl |
| 10499132 Mab21l2       | NM_011839     | 5.45513e-007 | -2.82734 | E11.5 * Wnt1 down vs E11.5 * Ctrl |
| 10351455 Rgs5          | NM_009063     | 9.19387e-006 | -2.82929 | E11.5 * Wnt1 down vs E11.5 * Ctrl |
| 10484201 2610301F02Rik | ENSMUST000001 | 1.3638e-006  | -2.83402 | E11.5 * Wnt1 down vs E11.5 * Ctrl |
| 10495685 Arhgap29      | NM_172525     | 6.28566e-007 | -2.84143 | E11.5 * Wnt1 down vs E11.5 * Ctrl |
| 10513158 Ptpn3         | NM_011207     | 2.61313e-005 | -2.84856 | E11.5 * Wnt1 down vs E11.5 * Ctrl |
| 10554808 Fzd4          | NM_008055     | 1.07129e-007 | -2.85547 | E11.5 * Wnt1 down vs E11.5 * Ctrl |
| 10514054 Nfib          | NM_001113209  | 7.84345e-011 | -2.86497 | E11.5 * Wnt1 down vs E11.5 * Ctrl |
| 10360415 Grem2         | NM_011825     | 1.03206e-008 | -2.86686 | E11.5 * Wnt1 down vs E11.5 * Ctrl |
| 10543959 Ptn           | NM_008973     | 6.10991e-008 | -2.90762 | E11.5 * Wnt1 down vs E11.5 * Ctrl |
| 10453857 Gata6         | NM_010258     | 3.15115e-007 | -2.90787 | E11.5 * Wnt1 down vs E11.5 * Ctrl |
| 10506050 Nfia          | NM_001122952  | 3.84943e-007 | -2.90844 | E11.5 * Wnt1 down vs E11.5 * Ctrl |
| 10498119 Frem2         | NM_172862     | 3.42164e-008 | -2.91066 | E11.5 * Wnt1 down vs E11.5 * Ctrl |
| 10496872 Eltd1         | NM_133222     | 9.43022e-006 | -2.93135 | E11.5 * Wnt1 down vs E11.5 * Ctrl |
| 10513957 Ptprd         | NM_011211     | 4.57414e-012 | -2.93177 | E11.5 * Wnt1 down vs E11.5 * Ctrl |
| 10484207 2610301F02Rik | NM_001025576  | 1.46287e-011 | -2.93207 | E11.5 * Wnt1 down vs E11.5 * Ctrl |
| 10523078 Afp           | NM_007423     | 0.00121003   | -2.94356 | E11.5 * Wnt1 down vs E11.5 * Ctrl |
| 10380571 Gngt2         | NM_023121     | 2.57234e-007 | -2.94459 | E11.5 * Wnt1 down vs E11.5 * Ctrl |
| 10428707 Has2          | NM_008216     | 7.46032e-009 | -2.95226 | E11.5 * Wnt1 down vs E11.5 * Ctrl |
| 10427286 Hoxc9         | NM_008272     | 6.75696e-010 | -2.9548  | E11.5 * Wnt1 down vs E11.5 * Ctrl |
| 10513739 Tnc           | NM_011607     | 1.0895e-007  | -2.95676 | E11.5 * Wnt1 down vs E11.5 * Ctrl |
| 10412335 Isl1          | NM_021459     | 4.02903e-006 | -2.96105 | E11.5 * Wnt1 down vs E11.5 * Ctrl |
| 10423548 Sdc2          | NM_008304     | 1.71471e-008 | -2.96641 | E11.5 * Wnt1 down vs E11.5 * Ctrl |
| 10522288 Shisa3        | NM_001033415  | 4.37162e-010 | -2.96683 | E11.5 * Wnt1 down vs E11.5 * Ctrl |
| 10565204 Bnc1          | NM_007562     | 8.56835e-009 | -2.99923 | E11.5 * Wnt1 down vs E11.5 * Ctrl |
| 10536444 Foxp2         | NM_053242     | 2.08994e-008 | -3.01973 | E11.5 * Wnt1 down vs E11.5 * Ctrl |
| 10502772 Lphn2         | NM_001081298  | 3.75138e-010 | -3.02214 | E11.5 * Wnt1 down vs E11.5 * Ctrl |
| 10519857 Hgf           | NM_010427     | 8.51602e-010 | -3.02981 | E11.5 * Wnt1 down vs E11.5 * Ctrl |
| 10440019 Tmem45a       | NM_019631     | 3.60944e-006 | -3.05555 | E11.5 * Wnt1 down vs E11.5 * Ctrl |
| 10590635 Ccr5          | NM_009917     | 3.59193e-007 | -3.05562 | E11.5 * Wnt1 down vs E11.5 * Ctrl |
| 10598013 Ccr5          | NM_009917     | 3.59193e-007 | -3.05562 | E11.5 * Wnt1 down vs E11.5 * Ctrl |
| 10427075 Krt18         | NM_010664     | 1.42901e-007 | -3.06492 | E11.5 * Wnt1 down vs E11.5 * Ctrl |
| 10354374 Slc40a1       | NM_016917     | 3.07819e-009 | -3.07248 | E11.5 * Wnt1 down vs E11.5 * Ctrl |
| 10513630 Ambp          | NM_007443     | 0.00017866   | -3.09066 | E11.5 * Wnt1 down vs E11.5 * Ctrl |
| 10548879 Mgp           | NM_008597     | 3.31469e-007 | -3.09761 | E11.5 * Wnt1 down vs E11.5 * Ctrl |
| 10381298 Ramp2         | NM_019444     | 4.81561e-007 | -3.11305 | E11.5 * Wnt1 down vs E11.5 * Ctrl |
| 10546454 Adamts9       | NM_175314     | 2.27195e-008 | -3.11814 | E11.5 * Wnt1 down vs E11.5 * Ctrl |
| 10503054 Lrrc7         | NM_001081358  | 1.82412e-005 | -3.12009 | E11.5 * Wnt1 down vs E11.5 * Ctrl |
| 10509002 Rhd           | NM_011270     | 4.32345e-010 | -3.12484 | E11.5 * Wnt1 down vs E11.5 * Ctrl |
| 10538126 Gimap4        | NM_174990     | 8.95405e-008 | -3.12815 | E11.5 * Wnt1 down vs E11.5 * Ctrl |
| 10421172 Slc25a37      | NM_026331     | 3.52189e-008 | -3.1359  | E11.5 * Wnt1 down vs E11.5 * Ctrl |
| 10569335 H19           | NR_001592     | 4.20723e-005 | -3.1472  | E11.5 * Wnt1 down vs E11.5 * Ctrl |
| 10358339 Cfh           | NM_009888     | 5.65588e-009 | -3.164   | E11.5 * Wnt1 down vs E11.5 * Ctrl |
| 10369842               | ---           | 0.000117399  | -3.16476 | E11.5 * Wnt1 down vs E11.5 * Ctrl |
| 10441864 Milt4         | NM_010806     | 4.86927e-013 | -3.16906 | E11.5 * Wnt1 down vs E11.5 * Ctrl |
| 10502770 Lphn2         | NM_001081298  | 1.64893e-005 | -3.17319 | E11.5 * Wnt1 down vs E11.5 * Ctrl |
| 10546430 Adamts9       | NM_175314     | 5.29048e-006 | -3.1794  | E11.5 * Wnt1 down vs E11.5 * Ctrl |
| 10483800               | ---           | 2.55005e-007 | -3.19028 | E11.5 * Wnt1 down vs E11.5 * Ctrl |
| 10503382 Runx1t1       | NM_001111027  | 1.50993e-007 | -3.19594 | E11.5 * Wnt1 down vs E11.5 * Ctrl |
| 10601569 Pcdh11x       | NM_001081385  | 5.37855e-005 | -3.19998 | E11.5 * Wnt1 down vs E11.5 * Ctrl |
| 10348451 Cxcr7         | NM_007722     | 5.60198e-009 | -3.20186 | E11.5 * Wnt1 down vs E11.5 * Ctrl |
| 10467838               | ---           | 8.16899e-006 | -3.22464 | E11.5 * Wnt1 down vs E11.5 * Ctrl |
| 10578264 Msr1          | NM_031195     | 1.945e-008   | -3.22615 | E11.5 * Wnt1 down vs E11.5 * Ctrl |
| 10595211 Col12a1       | NM_007730     | 6.75703e-008 | -3.23069 | E11.5 * Wnt1 down vs E11.5 * Ctrl |
| 10408693 F13a1         | NM_028784     | 2.76632e-007 | -3.23212 | E11.5 * Wnt1 down vs E11.5 * Ctrl |
| 10522530 Kit           | NM_001122733  | 2.63153e-010 | -3.23791 | E11.5 * Wnt1 down vs E11.5 * Ctrl |
| 10607484 Ptchd1        | NM_001093750  | 4.92524e-006 | -3.25995 | E11.5 * Wnt1 down vs E11.5 * Ctrl |

|          |               |               |              |          |                                   |
|----------|---------------|---------------|--------------|----------|-----------------------------------|
| 10591118 | Fat3          | NM_001080814  | 2.18686e-006 | -3.2818  | E11.5 * Wnt1 down vs E11.5 * Ctrl |
| 10531177 | Adamts3       | NM_001081401  | 2.37193e-008 | -3.28722 | E11.5 * Wnt1 down vs E11.5 * Ctrl |
| 10467124 | Acta2         | NM_007392     | 0.000621655  | -3.30344 | E11.5 * Wnt1 down vs E11.5 * Ctrl |
| 10591127 | Fat3          | NM_001080814  | 1.03616e-005 | -3.32069 | E11.5 * Wnt1 down vs E11.5 * Ctrl |
| 10405587 | Tgfb1         | NM_009369     | 2.96516e-007 | -3.32688 | E11.5 * Wnt1 down vs E11.5 * Ctrl |
| 10427293 | Hoxc6         | NM_010465     | 2.42624e-006 | -3.32765 | E11.5 * Wnt1 down vs E11.5 * Ctrl |
| 10491732 | Fat4          | NM_183221     | 1.27372e-007 | -3.33231 | E11.5 * Wnt1 down vs E11.5 * Ctrl |
| 10546736 | Cntn3         | NM_008779     | 1.4001e-008  | -3.33277 | E11.5 * Wnt1 down vs E11.5 * Ctrl |
| 10412260 | Fst           | NM_008046     | 2.32158e-008 | -3.34918 | E11.5 * Wnt1 down vs E11.5 * Ctrl |
| 10546450 | Adamts9       | NM_175314     | 1.88254e-006 | -3.35177 | E11.5 * Wnt1 down vs E11.5 * Ctrl |
| 10351463 | Rgs5          | ENSMUST000001 | 7.43924e-005 | -3.35355 | E11.5 * Wnt1 down vs E11.5 * Ctrl |
| 10398366 | ---           | ---           | 6.29349e-005 | -3.38797 | E11.5 * Wnt1 down vs E11.5 * Ctrl |
| 10568553 | 4631426J05Rik | NM_029935     | 4.37998e-008 | -3.39148 | E11.5 * Wnt1 down vs E11.5 * Ctrl |
| 10344897 | Sulf1         | NM_172294     | 3.36143e-007 | -3.40074 | E11.5 * Wnt1 down vs E11.5 * Ctrl |
| 10491319 | Kcnmb2        | NM_028231     | 2.73993e-008 | -3.41686 | E11.5 * Wnt1 down vs E11.5 * Ctrl |
| 10355893 | Epha4         | NM_007936     | 1.64513e-010 | -3.42621 | E11.5 * Wnt1 down vs E11.5 * Ctrl |
| 10591129 | Fat3          | NM_001080814  | 3.128e-005   | -3.42676 | E11.5 * Wnt1 down vs E11.5 * Ctrl |
| 10419151 | Ear1          | NM_007894     | 1.73318e-005 | -3.43295 | E11.5 * Wnt1 down vs E11.5 * Ctrl |
| 10545101 | Ptgsd2        | NM_019455     | 5.45475e-008 | -3.43875 | E11.5 * Wnt1 down vs E11.5 * Ctrl |
| 10456071 | Csf1r         | NM_001037859  | 7.42772e-008 | -3.44221 | E11.5 * Wnt1 down vs E11.5 * Ctrl |
| 10591739 | Acp5          | NM_001102404  | 2.241e-009   | -3.47015 | E11.5 * Wnt1 down vs E11.5 * Ctrl |
| 10506108 | ---           | ---           | 3.30891e-005 | -3.47028 | E11.5 * Wnt1 down vs E11.5 * Ctrl |
| 10376326 | Irgm2         | NM_019440     | 1.30945e-009 | -3.47102 | E11.5 * Wnt1 down vs E11.5 * Ctrl |
| 10584600 | ---           | ---           | 7.99058e-008 | -3.47362 | E11.5 * Wnt1 down vs E11.5 * Ctrl |
| 10361771 | Plagl1        | NM_009538     | 3.35262e-007 | -3.49904 | E11.5 * Wnt1 down vs E11.5 * Ctrl |
| 10514049 | Nfib          | NM_001113209  | 8.95107e-012 | -3.51268 | E11.5 * Wnt1 down vs E11.5 * Ctrl |
| 10517165 | Cd52          | NM_013706     | 2.47767e-007 | -3.51969 | E11.5 * Wnt1 down vs E11.5 * Ctrl |
| 10575034 | Cdh3          | NM_001037809  | 1.11727e-008 | -3.52194 | E11.5 * Wnt1 down vs E11.5 * Ctrl |
| 10498653 | 1110032A04Rik | NM_133675     | 1.11406e-006 | -3.53072 | E11.5 * Wnt1 down vs E11.5 * Ctrl |
| 10604393 | ENSMUSG0000C  | NM_019680     | 1.89882e-011 | -3.53353 | E11.5 * Wnt1 down vs E11.5 * Ctrl |
| 10513256 | Lpar1         | NM_010336     | 4.86178e-008 | -3.53537 | E11.5 * Wnt1 down vs E11.5 * Ctrl |
| 10604585 | ---           | ---           | 1.07062e-008 | -3.54171 | E11.5 * Wnt1 down vs E11.5 * Ctrl |
| 10572130 | Lpl           | NM_008509     | 1.89835e-010 | -3.54233 | E11.5 * Wnt1 down vs E11.5 * Ctrl |
| 10521972 | Pcdh7         | NM_018764     | 2.52353e-011 | -3.54238 | E11.5 * Wnt1 down vs E11.5 * Ctrl |
| 10523376 | Fras1         | NM_175473     | 4.05292e-009 | -3.58786 | E11.5 * Wnt1 down vs E11.5 * Ctrl |
| 10358224 | Ptpcr         | NM_001111316  | 3.06225e-007 | -3.59132 | E11.5 * Wnt1 down vs E11.5 * Ctrl |
| 10443108 | Syngap1       | XM_985548     | 5.16329e-005 | -3.59442 | E11.5 * Wnt1 down vs E11.5 * Ctrl |
| 10419261 | Bmp4          | NM_007554     | 2.74281e-009 | -3.59473 | E11.5 * Wnt1 down vs E11.5 * Ctrl |
| 10607848 | Egfl6         | NM_019397     | 5.58497e-007 | -3.5966  | E11.5 * Wnt1 down vs E11.5 * Ctrl |
| 10386996 | Myocd         | NM_145136     | 1.29096e-008 | -3.60006 | E11.5 * Wnt1 down vs E11.5 * Ctrl |
| 10472953 | Hoxd11        | NM_008273     | 1.09408e-007 | -3.60918 | E11.5 * Wnt1 down vs E11.5 * Ctrl |
| 10376956 | Hs3st3a1      | NM_178870     | 5.26421e-008 | -3.60952 | E11.5 * Wnt1 down vs E11.5 * Ctrl |
| 10372648 | Lyz2          | NM_017372     | 7.08376e-008 | -3.62571 | E11.5 * Wnt1 down vs E11.5 * Ctrl |
| 10553274 | Saa2          | NM_011314     | 1.028e-006   | -3.63493 | E11.5 * Wnt1 down vs E11.5 * Ctrl |
| 10493831 | S100a8        | NM_013650     | 6.77553e-006 | -3.6438  | E11.5 * Wnt1 down vs E11.5 * Ctrl |
| 10349648 | Ctse          | NM_007799     | 1.85369e-010 | -3.64703 | E11.5 * Wnt1 down vs E11.5 * Ctrl |
| 10499189 | Fcrls         | NM_030707     | 7.66532e-008 | -3.65557 | E11.5 * Wnt1 down vs E11.5 * Ctrl |
| 10380174 | Mpo           | NM_010824     | 6.64104e-011 | -3.66391 | E11.5 * Wnt1 down vs E11.5 * Ctrl |
| 10519717 | Sema3a        | NM_009152     | 7.12525e-009 | -3.67443 | E11.5 * Wnt1 down vs E11.5 * Ctrl |
| 10473399 | Prg2          | NM_008920     | 7.991e-008   | -3.68248 | E11.5 * Wnt1 down vs E11.5 * Ctrl |
| 10469404 | Cacnb2        | NM_023116     | 1.94365e-009 | -3.68282 | E11.5 * Wnt1 down vs E11.5 * Ctrl |
| 10366153 | Rassf9        | NM_146240     | 2.48045e-008 | -3.69508 | E11.5 * Wnt1 down vs E11.5 * Ctrl |
| 10408935 | ENSMUSG0000C  | ENSMUST000001 | 0.000849093  | -3.69737 | E11.5 * Wnt1 down vs E11.5 * Ctrl |
| 10517513 | C1qc          | NM_007574     | 7.76681e-009 | -3.72837 | E11.5 * Wnt1 down vs E11.5 * Ctrl |
| 10594855 | Cgnl1         | NM_026599     | 1.44429e-008 | -3.73112 | E11.5 * Wnt1 down vs E11.5 * Ctrl |
| 10362674 | Rnu3a         | NR_002842     | 0.000122682  | -3.73447 | E11.5 * Wnt1 down vs E11.5 * Ctrl |
| 10427290 | Hoxc8         | NM_010466     | 3.43007e-008 | -3.74118 | E11.5 * Wnt1 down vs E11.5 * Ctrl |
| 10447190 | Plekhh2       | NM_177606     | 4.26812e-011 | -3.75682 | E11.5 * Wnt1 down vs E11.5 * Ctrl |
| 10569341 | H19           | NR_001592     | 1.44252e-005 | -3.78252 | E11.5 * Wnt1 down vs E11.5 * Ctrl |
| 10409876 | Ctla2a        | NM_007796     | 1.14533e-006 | -3.78823 | E11.5 * Wnt1 down vs E11.5 * Ctrl |
| 10505954 | Tek           | NM_013690     | 1.68818e-009 | -3.79266 | E11.5 * Wnt1 down vs E11.5 * Ctrl |
| 10498921 | Tdo2          | NM_019911     | 5.8429e-008  | -3.82762 | E11.5 * Wnt1 down vs E11.5 * Ctrl |
| 10391649 | Slc4a1        | NM_011403     | 1.14866e-011 | -3.84048 | E11.5 * Wnt1 down vs E11.5 * Ctrl |
| 10581013 | Cdh11         | NM_009866     | 8.33906e-010 | -3.84745 | E11.5 * Wnt1 down vs E11.5 * Ctrl |
| 10530029 | Lgi2          | NM_144945     | 9.15854e-010 | -3.85418 | E11.5 * Wnt1 down vs E11.5 * Ctrl |
| 10405179 | S1pr3         | NM_010101     | 6.08864e-011 | -3.88048 | E11.5 * Wnt1 down vs E11.5 * Ctrl |

|          |               |              |              |          |                                   |
|----------|---------------|--------------|--------------|----------|-----------------------------------|
| 10537298 | Chrm2         | NM_203491    | 3.88954e-006 | -3.88393 | E11.5 * Wnt1 down vs E11.5 * Ctrl |
| 10544583 | Gimap6        | NM_153175    | 1.03082e-009 | -3.89416 | E11.5 * Wnt1 down vs E11.5 * Ctrl |
| 10511363 | Penk          | NM_001002927 | 2.10355e-008 | -3.91111 | E11.5 * Wnt1 down vs E11.5 * Ctrl |
| 10578136 | ---           | ---          | 3.74156e-006 | -3.92328 | E11.5 * Wnt1 down vs E11.5 * Ctrl |
| 10531931 | Sparcl1       | NM_010097    | 7.08302e-010 | -3.93638 | E11.5 * Wnt1 down vs E11.5 * Ctrl |
| 10423971 | Pkhd1l1       | NM_138674    | 1.1348e-015  | -3.94478 | E11.5 * Wnt1 down vs E11.5 * Ctrl |
| 10368495 | Rspo3         | NM_028351    | 3.05317e-011 | -3.97415 | E11.5 * Wnt1 down vs E11.5 * Ctrl |
| 10542592 | ENSMUSG00000  | AK143453     | 1.47834e-009 | -4.0179  | E11.5 * Wnt1 down vs E11.5 * Ctrl |
| 10392221 | Pecam1        | NM_008816    | 3.19602e-010 | -4.03471 | E11.5 * Wnt1 down vs E11.5 * Ctrl |
| 10496324 | Slc39a8       | NM_001135149 | 3.30061e-010 | -4.03605 | E11.5 * Wnt1 down vs E11.5 * Ctrl |
| 10422436 | Dock9         | NM_001081039 | 1.99414e-011 | -4.05304 | E11.5 * Wnt1 down vs E11.5 * Ctrl |
| 10534389 | Cldn13        | NM_020504    | 3.46507e-007 | -4.05635 | E11.5 * Wnt1 down vs E11.5 * Ctrl |
| 10542575 | Pde3a         | NM_018779    | 1.55081e-007 | -4.06968 | E11.5 * Wnt1 down vs E11.5 * Ctrl |
| 10484197 | 2610301F02Rik | ENSMUST00000 | 3.12945e-009 | -4.07679 | E11.5 * Wnt1 down vs E11.5 * Ctrl |
| 10591123 | Fat3          | NM_001080814 | 1.51144e-006 | -4.07836 | E11.5 * Wnt1 down vs E11.5 * Ctrl |
| 10394534 | Osr1          | NM_011859    | 6.35663e-006 | -4.0876  | E11.5 * Wnt1 down vs E11.5 * Ctrl |
| 10472965 | Hoxd8         | NM_008276    | 4.88667e-009 | -4.08811 | E11.5 * Wnt1 down vs E11.5 * Ctrl |
| 10483074 | Gcg           | NM_008100    | 1.08428e-008 | -4.09123 | E11.5 * Wnt1 down vs E11.5 * Ctrl |
| 10558769 | Ifitm1        | NM_026820    | 2.74292e-008 | -4.09157 | E11.5 * Wnt1 down vs E11.5 * Ctrl |
| 10396419 | ---           | ---          | 2.6106e-005  | -4.09356 | E11.5 * Wnt1 down vs E11.5 * Ctrl |
| 10554789 | Ctsc          | NM_009982    | 7.7733e-009  | -4.11393 | E11.5 * Wnt1 down vs E11.5 * Ctrl |
| 10346164 | Sdpr          | NM_138741    | 2.11824e-008 | -4.14101 | E11.5 * Wnt1 down vs E11.5 * Ctrl |
| 10445268 | Gpr116        | NM_001081178 | 5.15928e-010 | -4.18092 | E11.5 * Wnt1 down vs E11.5 * Ctrl |
| 10366446 | Tspan8        | NM_146010    | 3.66047e-005 | -4.18684 | E11.5 * Wnt1 down vs E11.5 * Ctrl |
| 10514088 | Frem1         | NM_177863    | 8.99722e-011 | -4.19029 | E11.5 * Wnt1 down vs E11.5 * Ctrl |
| 10606369 | Itm2a         | NM_008409    | 1.39146e-006 | -4.23981 | E11.5 * Wnt1 down vs E11.5 * Ctrl |
| 10365983 | Lum           | NM_008524    | 3.0368e-005  | -4.24127 | E11.5 * Wnt1 down vs E11.5 * Ctrl |
| 10467826 | LOC545291     | NM_001081257 | 8.21169e-009 | -4.25357 | E11.5 * Wnt1 down vs E11.5 * Ctrl |
| 10423520 | Sema5a        | NM_009154    | 1.34922e-009 | -4.276   | E11.5 * Wnt1 down vs E11.5 * Ctrl |
| 10435948 | Ccdc80        | NM_026439    | 6.67469e-009 | -4.31469 | E11.5 * Wnt1 down vs E11.5 * Ctrl |
| 10498935 | Gucy1b3       | NM_017469    | 1.92711e-007 | -4.36592 | E11.5 * Wnt1 down vs E11.5 * Ctrl |
| 10574415 | 1700047G07Rik | ENSMUST00000 | 8.13026e-006 | -4.36632 | E11.5 * Wnt1 down vs E11.5 * Ctrl |
| 10546432 | Adamts9       | NM_175314    | 2.27103e-005 | -4.37819 | E11.5 * Wnt1 down vs E11.5 * Ctrl |
| 10498952 | Gucy1a3       | NM_021896    | 3.53592e-010 | -4.45699 | E11.5 * Wnt1 down vs E11.5 * Ctrl |
| 10569344 | Igf2          | NM_001122737 | 3.19061e-007 | -4.47961 | E11.5 * Wnt1 down vs E11.5 * Ctrl |
| 10398380 | ---           | ---          | 1.87683e-006 | -4.48061 | E11.5 * Wnt1 down vs E11.5 * Ctrl |
| 10486041 | Meis2         | NM_001136072 | 1.32707e-007 | -4.56972 | E11.5 * Wnt1 down vs E11.5 * Ctrl |
| 10603551 | Cybb          | NM_007807    | 9.36509e-008 | -4.63069 | E11.5 * Wnt1 down vs E11.5 * Ctrl |
| 10568436 | Fgfr2         | NM_010207    | 3.40678e-008 | -4.63356 | E11.5 * Wnt1 down vs E11.5 * Ctrl |
| 10490775 | ENSMUSG00000  | ENSMUST00000 | 5.32962e-007 | -4.644   | E11.5 * Wnt1 down vs E11.5 * Ctrl |
| 10576049 | Foxf1a        | ENSMUST00000 | 5.48839e-007 | -4.66023 | E11.5 * Wnt1 down vs E11.5 * Ctrl |
| 10501063 | Cd53          | NM_007651    | 1.00107e-008 | -4.67284 | E11.5 * Wnt1 down vs E11.5 * Ctrl |
| 10369615 | Srgn          | NM_011157    | 6.65956e-009 | -4.71637 | E11.5 * Wnt1 down vs E11.5 * Ctrl |
| 10499861 | S100a9        | NM_009114    | 6.02032e-008 | -4.74833 | E11.5 * Wnt1 down vs E11.5 * Ctrl |
| 10406254 | Ell2          | NM_138953    | 4.92693e-010 | -4.7821  | E11.5 * Wnt1 down vs E11.5 * Ctrl |
| 10427402 | Ghr           | NM_010284    | 3.68505e-010 | -4.80293 | E11.5 * Wnt1 down vs E11.5 * Ctrl |
| 10352905 | Cd34          | NM_001111059 | 8.51875e-009 | -4.80528 | E11.5 * Wnt1 down vs E11.5 * Ctrl |
| 10554129 | B130024G19Rik | BC070425     | 1.76818e-009 | -4.83304 | E11.5 * Wnt1 down vs E11.5 * Ctrl |
| 10424105 | Colec10       | NM_173422    | 3.99356e-012 | -4.94443 | E11.5 * Wnt1 down vs E11.5 * Ctrl |
| 10433776 | Snai2         | NM_011415    | 2.12413e-009 | -4.98241 | E11.5 * Wnt1 down vs E11.5 * Ctrl |
| 10488382 | Cd93          | NM_010740    | 1.35494e-009 | -5.01195 | E11.5 * Wnt1 down vs E11.5 * Ctrl |
| 10428376 | Angpt1        | NM_009640    | 1.79155e-009 | -5.06396 | E11.5 * Wnt1 down vs E11.5 * Ctrl |
| 10356880 | St8sia4       | NM_009183    | 4.61691e-012 | -5.17321 | E11.5 * Wnt1 down vs E11.5 * Ctrl |
| 10578950 | ENSMUSG00000  | ENSMUST00000 | 4.31954e-009 | -5.18243 | E11.5 * Wnt1 down vs E11.5 * Ctrl |
| 10422728 | Dab2          | NM_023118    | 4.6894e-009  | -5.3352  | E11.5 * Wnt1 down vs E11.5 * Ctrl |
| 10369023 | Fam162b       | BC147085     | 4.01758e-008 | -5.3541  | E11.5 * Wnt1 down vs E11.5 * Ctrl |
| 10500559 | Hsd3b6        | NM_013821    | 7.44482e-009 | -5.38102 | E11.5 * Wnt1 down vs E11.5 * Ctrl |
| 10536635 | A430107O13Rik | NM_001081351 | 8.96996e-010 | -5.40969 | E11.5 * Wnt1 down vs E11.5 * Ctrl |
| 10537296 | ---           | ---          | 3.53411e-007 | -5.42702 | E11.5 * Wnt1 down vs E11.5 * Ctrl |
| 10490923 | Car2          | NM_009801    | 1.44569e-009 | -5.44561 | E11.5 * Wnt1 down vs E11.5 * Ctrl |
| 10423917 | ---           | ---          | 0.000162142  | -5.53708 | E11.5 * Wnt1 down vs E11.5 * Ctrl |
| 10385770 | Olfr1372-ps1  | BC055827     | 1.06394e-007 | -5.56066 | E11.5 * Wnt1 down vs E11.5 * Ctrl |
| 10439299 | Stfa3         | NM_025288    | 9.20211e-008 | -5.58181 | E11.5 * Wnt1 down vs E11.5 * Ctrl |
| 10563611 | Saa1          | NM_009117    | 8.43752e-007 | -5.60776 | E11.5 * Wnt1 down vs E11.5 * Ctrl |
| 10438445 | Klhl6         | NM_183390    | 1.67459e-011 | -5.64057 | E11.5 * Wnt1 down vs E11.5 * Ctrl |
| 10365974 | Dcn           | NM_007833    | 2.49393e-006 | -5.71167 | E11.5 * Wnt1 down vs E11.5 * Ctrl |

|                        |               |              |          |                                   |
|------------------------|---------------|--------------|----------|-----------------------------------|
| 10592533               | ---           | 6.40079e-010 | -5.8347  | E11.5 * Wnt1 down vs E11.5 * Ctrl |
| 10601519 Kihl4         | NM_172781     | 1.41568e-008 | -5.87175 | E11.5 * Wnt1 down vs E11.5 * Ctrl |
| 10569017 Ifitm3        | NM_025378     | 5.41359e-007 | -5.9167  | E11.5 * Wnt1 down vs E11.5 * Ctrl |
| 10523451 Anxa3         | NM_013470     | 1.42104e-008 | -5.91803 | E11.5 * Wnt1 down vs E11.5 * Ctrl |
| 10473444 Aplnr         | NM_011784     | 6.55862e-011 | -5.95756 | E11.5 * Wnt1 down vs E11.5 * Ctrl |
| 10522503 Pdgfra        | NM_011058     | 1.40176e-007 | -6.02308 | E11.5 * Wnt1 down vs E11.5 * Ctrl |
| 10586865 Aldh1a2       | NM_009022     | 4.44652e-008 | -6.02903 | E11.5 * Wnt1 down vs E11.5 * Ctrl |
| 10450484 Aif1          | NM_019467     | 1.21749e-007 | -6.04333 | E11.5 * Wnt1 down vs E11.5 * Ctrl |
| 10404606 Ly86          | NM_010745     | 6.56118e-009 | -6.06171 | E11.5 * Wnt1 down vs E11.5 * Ctrl |
| 10559790 Zim1          | NM_011769     | 7.83362e-010 | -6.1427  | E11.5 * Wnt1 down vs E11.5 * Ctrl |
| 10484371 Calcl         | NM_018782     | 1.42018e-010 | -6.20101 | E11.5 * Wnt1 down vs E11.5 * Ctrl |
| 10512757 Hemgn         | NM_053149     | 2.08736e-011 | -6.35108 | E11.5 * Wnt1 down vs E11.5 * Ctrl |
| 10351905 Spna1         | NM_011465     | 1.07168e-012 | -6.38078 | E11.5 * Wnt1 down vs E11.5 * Ctrl |
| 10523134 Pf4           | NM_019932     | 1.71199e-008 | -6.41335 | E11.5 * Wnt1 down vs E11.5 * Ctrl |
| 10514185               | ---           | 1.05381e-005 | -6.43171 | E11.5 * Wnt1 down vs E11.5 * Ctrl |
| 10446965 Rasgrp3       | NM_207246     | 2.10608e-010 | -6.45534 | E11.5 * Wnt1 down vs E11.5 * Ctrl |
| 10466800 Pgm5          | NM_175013     | 1.25165e-007 | -6.45588 | E11.5 * Wnt1 down vs E11.5 * Ctrl |
| 10451677               | ---           | 2.23279e-011 | -6.47948 | E11.5 * Wnt1 down vs E11.5 * Ctrl |
| 10523756               | ---           | 2.23279e-011 | -6.47948 | E11.5 * Wnt1 down vs E11.5 * Ctrl |
| 10537504               | ---           | 2.23279e-011 | -6.47948 | E11.5 * Wnt1 down vs E11.5 * Ctrl |
| 10574438 Cdh5          | NM_009868     | 2.14826e-008 | -6.50756 | E11.5 * Wnt1 down vs E11.5 * Ctrl |
| 10531724 Plac8         | NM_139198     | 2.43952e-006 | -6.60837 | E11.5 * Wnt1 down vs E11.5 * Ctrl |
| 10359504 Dnm3os        | NR_002870     | 3.32665e-007 | -6.63718 | E11.5 * Wnt1 down vs E11.5 * Ctrl |
| 10461614 Ms4a6c        | NM_028595     | 1.65397e-010 | -6.72105 | E11.5 * Wnt1 down vs E11.5 * Ctrl |
| 10542981 Gmfg          | NM_022024     | 3.71837e-009 | -6.76922 | E11.5 * Wnt1 down vs E11.5 * Ctrl |
| 10544383 Kel           | NM_032540     | 1.28846e-014 | -6.99346 | E11.5 * Wnt1 down vs E11.5 * Ctrl |
| 10368240 Tcf21         | NM_011545     | 1.4355e-008  | -7.05481 | E11.5 * Wnt1 down vs E11.5 * Ctrl |
| 10484283 Pde1a         | NM_016744     | 9.75054e-011 | -7.11387 | E11.5 * Wnt1 down vs E11.5 * Ctrl |
| 10523359 Cxcl13        | NM_018866     | 7.82275e-010 | -7.16871 | E11.5 * Wnt1 down vs E11.5 * Ctrl |
| 10601942 Nr1           | NM_013724     | 5.03741e-008 | -7.19942 | E11.5 * Wnt1 down vs E11.5 * Ctrl |
| 10571840 Hpgd          | NM_008278     | 2.35441e-009 | -7.30751 | E11.5 * Wnt1 down vs E11.5 * Ctrl |
| 10500780 Nr1h5         | NM_198658     | 1.24489e-010 | -7.43618 | E11.5 * Wnt1 down vs E11.5 * Ctrl |
| 10397645 Gpr65         | NM_008152     | 6.27868e-009 | -7.45339 | E11.5 * Wnt1 down vs E11.5 * Ctrl |
| 10548892 Arhgdib       | NM_007486     | 8.69219e-008 | -7.75856 | E11.5 * Wnt1 down vs E11.5 * Ctrl |
| 10357488 Cd55          | NM_010016     | 3.15794e-010 | -8.0657  | E11.5 * Wnt1 down vs E11.5 * Ctrl |
| 10570434 Ifitm1        | NM_026820     | 9.80197e-010 | -8.29073 | E11.5 * Wnt1 down vs E11.5 * Ctrl |
| 10416437 Lcp1          | NM_008879     | 2.6651e-011  | -8.31511 | E11.5 * Wnt1 down vs E11.5 * Ctrl |
| 10461622 Ms4a6b        | NM_027209     | 1.06976e-008 | -8.43349 | E11.5 * Wnt1 down vs E11.5 * Ctrl |
| 10422760 Fyb           | NM_011815     | 4.76039e-011 | -8.58855 | E11.5 * Wnt1 down vs E11.5 * Ctrl |
| 10445192 Rhag          | NM_011269     | 1.12535e-011 | -8.66038 | E11.5 * Wnt1 down vs E11.5 * Ctrl |
| 10587231 Bmp5          | NM_007555     | 5.46439e-009 | -8.82071 | E11.5 * Wnt1 down vs E11.5 * Ctrl |
| 10604175 Fam70a        | NM_172930     | 3.6809e-010  | -8.82926 | E11.5 * Wnt1 down vs E11.5 * Ctrl |
| 10480090 Itga8         | NM_001001309  | 1.33793e-010 | -9.04913 | E11.5 * Wnt1 down vs E11.5 * Ctrl |
| 10496359 Emcn          | NM_016885     | 3.11701e-012 | -9.54448 | E11.5 * Wnt1 down vs E11.5 * Ctrl |
| 10494271 Ctss          | NM_021281     | 4.71185e-010 | -10.0091 | E11.5 * Wnt1 down vs E11.5 * Ctrl |
| 10573054 Gypa          | NM_010369     | 2.02039e-010 | -10.0152 | E11.5 * Wnt1 down vs E11.5 * Ctrl |
| 10551883 Tyrobp        | NM_011662     | 3.54359e-011 | -10.0535 | E11.5 * Wnt1 down vs E11.5 * Ctrl |
| 10547657 C3ar1         | NM_009779     | 9.38993e-011 | -10.1163 | E11.5 * Wnt1 down vs E11.5 * Ctrl |
| 10472958 Hoxd10        | NM_013554     | 5.55426e-008 | -10.5749 | E11.5 * Wnt1 down vs E11.5 * Ctrl |
| 10600024 Gpr50         | NM_010340     | 1.50918e-009 | -10.6583 | E11.5 * Wnt1 down vs E11.5 * Ctrl |
| 10469358 Mrc1          | NM_008625     | 9.07102e-012 | -11.0292 | E11.5 * Wnt1 down vs E11.5 * Ctrl |
| 10347931 C130026I21Rik | BC007193      | 1.24234e-009 | -12.1604 | E11.5 * Wnt1 down vs E11.5 * Ctrl |
| 10500796               | ---           | 1.34066e-010 | -12.3214 | E11.5 * Wnt1 down vs E11.5 * Ctrl |
| 10439292 BC100530      | NM_001082546  | 2.34568e-009 | -12.6251 | E11.5 * Wnt1 down vs E11.5 * Ctrl |
| 10574023 Mt2           | NM_008630     | 8.54264e-011 | -15.6768 | E11.5 * Wnt1 down vs E11.5 * Ctrl |
| 10566272 Hbb-y         | NM_008221     | 3.99355e-007 | -31.0044 | E11.5 * Wnt1 down vs E11.5 * Ctrl |
| 10375046 Hba-x         | NM_010405     | 1.40534e-009 | -47.8866 | E11.5 * Wnt1 down vs E11.5 * Ctrl |
| 10375058 Hba-a2        | NM_001083955  | 1.2189e-009  | -50.6126 | E11.5 * Wnt1 down vs E11.5 * Ctrl |
| 10566258 Hbb-b1        | ENSMUST000001 | 7.33325e-010 | -53.1168 | E11.5 * Wnt1 down vs E11.5 * Ctrl |
| 10375051 Hba-a1        | NM_008218     | 1.60102e-009 | -53.4619 | E11.5 * Wnt1 down vs E11.5 * Ctrl |
| 10566254 Hbb-b1        | NM_008220     | 8.2729e-010  | -59.3173 | E11.5 * Wnt1 down vs E11.5 * Ctrl |
| 10566268 Hbb-bh1       | NM_008219     | 1.5701e-011  | -121.789 | E11.5 * Wnt1 down vs E11.5 * Ctrl |

## S11 vs C11

Probeset ID    Gene Symbol    RefSeq    p-value    Fold-change Comparison

|          |               |               |              |         |                                  |
|----------|---------------|---------------|--------------|---------|----------------------------------|
| 10593756 | Chrna3        | NM_145129     | 1.42855e-017 | 31.0444 | E11.5 * Sox10 up vs E11.5 * Ctrl |
| 10357103 | Cdh19         | NM_001081386  | 8.50558e-013 | 24.2301 | E11.5 * Sox10 up vs E11.5 * Ctrl |
| 10547227 | Ret           | NM_001080780  | 4.15503e-016 | 22.982  | E11.5 * Sox10 up vs E11.5 * Ctrl |
| 10515095 | Elavl4        | NM_010488     | 1.19519e-015 | 18.3919 | E11.5 * Sox10 up vs E11.5 * Ctrl |
| 10576332 | Tubb3         | NM_023279     | 3.40598e-012 | 17.8591 | E11.5 * Sox10 up vs E11.5 * Ctrl |
| 10595033 | Scg3          | NM_009130     | 3.35504e-016 | 16.5488 | E11.5 * Sox10 up vs E11.5 * Ctrl |
| 10536667 | Ptprz1        | NM_001081306  | 1.46002e-015 | 16.1907 | E11.5 * Sox10 up vs E11.5 * Ctrl |
| 10492169 | Mab21l1       | NM_010750     | 4.59575e-015 | 14.5006 | E11.5 * Sox10 up vs E11.5 * Ctrl |
| 10427862 | Cdh6          | NM_007666     | 3.03876e-016 | 13.286  | E11.5 * Sox10 up vs E11.5 * Ctrl |
| 10431812 | Nell2         | NM_016743     | 4.26103e-015 | 12.729  | E11.5 * Sox10 up vs E11.5 * Ctrl |
| 10470412 | Dbh           | NM_138942     | 3.87969e-014 | 11.9563 | E11.5 * Sox10 up vs E11.5 * Ctrl |
| 10373467 | Erbb3         | NM_010153     | 6.05005e-013 | 11.7862 | E11.5 * Sox10 up vs E11.5 * Ctrl |
| 10464471 | Gal           | NM_010253     | 7.98352e-011 | 10.8923 | E11.5 * Sox10 up vs E11.5 * Ctrl |
| 10531869 | Mapk10        | NM_009158     | 3.81004e-014 | 10.8553 | E11.5 * Sox10 up vs E11.5 * Ctrl |
| 10431659 | Kif21a        | NM_001109040  | 1.69686e-015 | 9.65558 | E11.5 * Sox10 up vs E11.5 * Ctrl |
| 10417628 | Cadps         | NM_012061     | 8.99827e-013 | 9.43107 | E11.5 * Sox10 up vs E11.5 * Ctrl |
| 10490818 | Stmn2         | NM_025285     | 1.56112e-013 | 9.20625 | E11.5 * Sox10 up vs E11.5 * Ctrl |
| 10543802 | Plxna4        | NM_175750     | 1.68247e-014 | 9.01822 | E11.5 * Sox10 up vs E11.5 * Ctrl |
| 10522895 | Csn3          | NM_007786     | 1.18321e-011 | 8.9885  | E11.5 * Sox10 up vs E11.5 * Ctrl |
| 10605113 | L1cam         | NM_008478     | 3.6917e-014  | 8.98042 | E11.5 * Sox10 up vs E11.5 * Ctrl |
| 10463737 | Ina           | AK144917      | 3.88912e-011 | 8.95211 | E11.5 * Sox10 up vs E11.5 * Ctrl |
| 10523231 | Art3          | NM_181728     | 2.30623e-014 | 8.77677 | E11.5 * Sox10 up vs E11.5 * Ctrl |
| 10432675 | I730030J21Rik | ENSMUST000001 | 7.61061e-009 | 8.59491 | E11.5 * Sox10 up vs E11.5 * Ctrl |
| 10402020 | Eml5          | NM_001081191  | 2.51928e-015 | 8.51556 | E11.5 * Sox10 up vs E11.5 * Ctrl |
| 10372324 | Syt1          | NM_009306     | 5.72974e-012 | 8.51273 | E11.5 * Sox10 up vs E11.5 * Ctrl |
| 10499431 | Syt11         | NM_018804     | 7.62949e-014 | 7.9546  | E11.5 * Sox10 up vs E11.5 * Ctrl |
| 10345016 | Tcfap2b       | NM_001025305  | 2.13579e-012 | 7.71177 | E11.5 * Sox10 up vs E11.5 * Ctrl |
| 10593767 | Chrn4         | NM_148944     | 1.43229e-011 | 7.70393 | E11.5 * Sox10 up vs E11.5 * Ctrl |
| 10585484 | Chrna5        | NM_176844     | 4.07404e-012 | 7.30208 | E11.5 * Sox10 up vs E11.5 * Ctrl |
| 10367982 | Gpr126        | NM_001002268  | 2.34462e-013 | 7.28619 | E11.5 * Sox10 up vs E11.5 * Ctrl |
| 10423243 | Cdh10         | NM_009865     | 2.85677e-011 | 7.23871 | E11.5 * Sox10 up vs E11.5 * Ctrl |
| 10428698 | Sntb1         | NM_016667     | 1.00286e-013 | 7.23379 | E11.5 * Sox10 up vs E11.5 * Ctrl |
| 10575693 | Vat1l         | NM_173016     | 1.18346e-012 | 7.09111 | E11.5 * Sox10 up vs E11.5 * Ctrl |
| 10464370 | Slc18a2       | NM_172523     | 3.41059e-013 | 7.05644 | E11.5 * Sox10 up vs E11.5 * Ctrl |
| 10463732 | Ina           | NM_146100     | 5.9778e-015  | 6.95836 | E11.5 * Sox10 up vs E11.5 * Ctrl |
| 10597817 | Cck           | NM_031161     | 1.81906e-009 | 6.67985 | E11.5 * Sox10 up vs E11.5 * Ctrl |
| 10494043 | Tdrkh         | NM_028307     | 2.13837e-013 | 6.6519  | E11.5 * Sox10 up vs E11.5 * Ctrl |
| 10601888 | Plp1          | NM_011123     | 4.40775e-011 | 6.61103 | E11.5 * Sox10 up vs E11.5 * Ctrl |
| 10554900 | Dlg2          | NM_011807     | 1.21455e-013 | 6.42699 | E11.5 * Sox10 up vs E11.5 * Ctrl |
| 10408798 | Tcfap2a       | NM_011547     | 1.80483e-012 | 6.36505 | E11.5 * Sox10 up vs E11.5 * Ctrl |
| 10368999 | Grik2         | NM_010349     | 1.15238e-012 | 6.33903 | E11.5 * Sox10 up vs E11.5 * Ctrl |
| 10422164 | Ednrb         | NM_007904     | 3.3722e-015  | 6.29359 | E11.5 * Sox10 up vs E11.5 * Ctrl |
| 10439514 | Gap43         | NM_008083     | 2.77244e-014 | 6.24286 | E11.5 * Sox10 up vs E11.5 * Ctrl |
| 10498885 | Gria2         | NM_013540     | 3.15653e-011 | 6.22541 | E11.5 * Sox10 up vs E11.5 * Ctrl |
| 10363224 | Fabp7         | NM_021272     | 2.28508e-012 | 6.14351 | E11.5 * Sox10 up vs E11.5 * Ctrl |
| 10522388 | Slc10a4       | NM_173403     | 1.12036e-011 | 5.97466 | E11.5 * Sox10 up vs E11.5 * Ctrl |
| 10491477 | Sox2          | NM_011443     | 1.84543e-009 | 5.93813 | E11.5 * Sox10 up vs E11.5 * Ctrl |
| 10353192 | Eya1          | NM_010164     | 1.43604e-011 | 5.80427 | E11.5 * Sox10 up vs E11.5 * Ctrl |
| 10492640 | Fstl5         | NM_178673     | 1.72417e-011 | 5.68055 | E11.5 * Sox10 up vs E11.5 * Ctrl |
| 10458663 | Dpysl3        | NM_009468     | 1.32373e-013 | 5.64483 | E11.5 * Sox10 up vs E11.5 * Ctrl |
| 10368175 | Pde7b         | NM_013875     | 1.72844e-011 | 5.63926 | E11.5 * Sox10 up vs E11.5 * Ctrl |
| 10540298 | Chl1          | NM_007697     | 8.69657e-013 | 5.58508 | E11.5 * Sox10 up vs E11.5 * Ctrl |
| 10400926 | Rtn1          | NM_153457     | 1.33097e-011 | 5.52782 | E11.5 * Sox10 up vs E11.5 * Ctrl |
| 10508052 | Grik3         | NM_001081097  | 1.52131e-010 | 5.5106  | E11.5 * Sox10 up vs E11.5 * Ctrl |
| 10530306 | Phox2b        | NM_008888     | 1.15544e-011 | 5.43972 | E11.5 * Sox10 up vs E11.5 * Ctrl |
| 10522208 | Uchl1         | NM_011670     | 3.96755e-010 | 5.38989 | E11.5 * Sox10 up vs E11.5 * Ctrl |
| 10586591 | Car12         | NM_178396     | 6.84604e-012 | 5.38943 | E11.5 * Sox10 up vs E11.5 * Ctrl |
| 10362372 | 9330159F19Rik | BC138282      | 1.23927e-010 | 5.31468 | E11.5 * Sox10 up vs E11.5 * Ctrl |
| 10423836 | Cthrc1        | NM_026778     | 5.28545e-014 | 5.26788 | E11.5 * Sox10 up vs E11.5 * Ctrl |
| 10443463 | Cdkn1a        | NM_007669     | 9.83068e-011 | 5.25802 | E11.5 * Sox10 up vs E11.5 * Ctrl |
| 10485955 | Scg5          | NM_009162     | 3.88907e-013 | 5.23895 | E11.5 * Sox10 up vs E11.5 * Ctrl |
| 10584549 | Scn3b         | NM_178227     | 1.23832e-011 | 5.23049 | E11.5 * Sox10 up vs E11.5 * Ctrl |
| 10603151 | Gpm6b         | NM_023122     | 2.28498e-014 | 5.1687  | E11.5 * Sox10 up vs E11.5 * Ctrl |
| 10408629 | 1300014I06Rik | NM_025831     | 1.51899e-011 | 5.10588 | E11.5 * Sox10 up vs E11.5 * Ctrl |
| 10605437 | Pls3          | NM_145629     | 3.25618e-013 | 5.10199 | E11.5 * Sox10 up vs E11.5 * Ctrl |
| 10395553 | Nrcam         | NM_176930     | 3.11368e-012 | 5.02772 | E11.5 * Sox10 up vs E11.5 * Ctrl |

|                        |              |              |         |                                  |
|------------------------|--------------|--------------|---------|----------------------------------|
| 10514510 Cyp2j6        | NM_010008    | 7.1451e-012  | 5.0022  | E11.5 * Sox10 up vs E11.5 * Ctrl |
| 10411527 Cartpt        | NM_013732    | 1.16595e-007 | 4.91073 | E11.5 * Sox10 up vs E11.5 * Ctrl |
| 10514520 Cyp2j9        | NM_028979    | 4.59091e-011 | 4.89445 | E11.5 * Sox10 up vs E11.5 * Ctrl |
| 10472809 Dlx1          | NM_010053    | 1.28456e-012 | 4.85003 | E11.5 * Sox10 up vs E11.5 * Ctrl |
| 10476512 Snap25        | NM_011428    | 3.72287e-012 | 4.77474 | E11.5 * Sox10 up vs E11.5 * Ctrl |
| 10416340 Gfra2         | NM_008115    | 4.15648e-012 | 4.75431 | E11.5 * Sox10 up vs E11.5 * Ctrl |
| 10465820 Gng3          | NM_010316    | 3.32024e-010 | 4.65961 | E11.5 * Sox10 up vs E11.5 * Ctrl |
| 10520950 Pdlim1        | NM_016861    | 3.52146e-011 | 4.63135 | E11.5 * Sox10 up vs E11.5 * Ctrl |
| 10569646 Ccnd1         | NM_007631    | 3.92476e-013 | 4.57095 | E11.5 * Sox10 up vs E11.5 * Ctrl |
| 10402708 Ckb           | NM_021273    | 8.23454e-011 | 4.47947 | E11.5 * Sox10 up vs E11.5 * Ctrl |
| 10529903 Fam184b       | NM_021416    | 3.73078e-010 | 4.45933 | E11.5 * Sox10 up vs E11.5 * Ctrl |
| 10483803 6720416L17Rik | ENSMUST00000 | 4.88264e-011 | 4.42593 | E11.5 * Sox10 up vs E11.5 * Ctrl |
| 10492136 Dclk1         | NM_019978    | 4.14056e-013 | 4.39523 | E11.5 * Sox10 up vs E11.5 * Ctrl |
| 10543058 Dlx5          | NM_010056    | 3.53384e-008 | 4.38633 | E11.5 * Sox10 up vs E11.5 * Ctrl |
| 10491136 Tnik          | BC137799     | 3.3858e-015  | 4.38043 | E11.5 * Sox10 up vs E11.5 * Ctrl |
| 10458052 Epb4.1l4a     | NM_013512    | 1.14318e-012 | 4.33362 | E11.5 * Sox10 up vs E11.5 * Ctrl |
| 10562223 Fxyd3         | NM_008557    | 2.47495e-012 | 4.32217 | E11.5 * Sox10 up vs E11.5 * Ctrl |
| 10505998 Fggy          | NM_001113412 | 1.33311e-007 | 4.30463 | E11.5 * Sox10 up vs E11.5 * Ctrl |
| 10346882 Adam23        | NM_011780    | 6.12772e-011 | 4.24644 | E11.5 * Sox10 up vs E11.5 * Ctrl |
| 10467420 Pdlim1        | NM_016861    | 1.29345e-010 | 4.24297 | E11.5 * Sox10 up vs E11.5 * Ctrl |
| 10584259 Fez1          | NM_183171    | 8.07002e-014 | 4.19258 | E11.5 * Sox10 up vs E11.5 * Ctrl |
| 10351400 Fam78b        | NM_175461    | 2.28233e-011 | 4.18394 | E11.5 * Sox10 up vs E11.5 * Ctrl |
| 10468452 Sorcs1        | NM_021377    | 6.80181e-013 | 4.14835 | E11.5 * Sox10 up vs E11.5 * Ctrl |
| 10603896 Khlh13        | NM_026167    | 1.83427e-013 | 4.14466 | E11.5 * Sox10 up vs E11.5 * Ctrl |
| 10363541 Ass1          | NM_007494    | 1.44276e-009 | 4.13774 | E11.5 * Sox10 up vs E11.5 * Ctrl |
| 10354529 1700019D03Rik | NM_144953    | 1.92669e-009 | 4.13709 | E11.5 * Sox10 up vs E11.5 * Ctrl |
| 10605874 Eda2r         | NM_175540    | 2.16459e-007 | 4.11695 | E11.5 * Sox10 up vs E11.5 * Ctrl |
| 10474096 Lrrc4c        | NM_178725    | 4.24112e-012 | 4.09756 | E11.5 * Sox10 up vs E11.5 * Ctrl |
| 10485718 Ano3          | NM_001128103 | 3.48932e-008 | 4.09222 | E11.5 * Sox10 up vs E11.5 * Ctrl |
| 10485979 Gjd2          | NM_010290    | 4.00074e-007 | 4.0421  | E11.5 * Sox10 up vs E11.5 * Ctrl |
| 10406461 C130071C03Rik | ENSMUST00000 | 2.56303e-009 | 4.02192 | E11.5 * Sox10 up vs E11.5 * Ctrl |
| 10505994 Fggy          | NM_001113412 | 3.43819e-006 | 3.99917 | E11.5 * Sox10 up vs E11.5 * Ctrl |
| 10471994 Kif5c         | NM_008449    | 5.82096e-011 | 3.99646 | E11.5 * Sox10 up vs E11.5 * Ctrl |
| 10471154 Ass1          | NM_007494    | 3.87452e-009 | 3.96457 | E11.5 * Sox10 up vs E11.5 * Ctrl |
| 10366163 Slc6a15       | NM_175328    | 3.17231e-009 | 3.95564 | E11.5 * Sox10 up vs E11.5 * Ctrl |
| 10533055 1500001A10Rik | NM_026886    | 4.91942e-013 | 3.95365 | E11.5 * Sox10 up vs E11.5 * Ctrl |
| 10346150 Tmeff2        | NM_019790    | 4.90869e-013 | 3.93506 | E11.5 * Sox10 up vs E11.5 * Ctrl |
| 10359113 Fam163a       | NM_177838    | 9.78232e-009 | 3.80496 | E11.5 * Sox10 up vs E11.5 * Ctrl |
| 10452766               | ---          | 0.000413383  | 3.77585 | E11.5 * Sox10 up vs E11.5 * Ctrl |
| 10413419 Arhgef3       | NM_027871    | 4.25734e-011 | 3.76358 | E11.5 * Sox10 up vs E11.5 * Ctrl |
| 10599880 Sliitrk2      | NM_198863    | 1.73025e-010 | 3.71594 | E11.5 * Sox10 up vs E11.5 * Ctrl |
| 10548030 Cd9           | NM_007657    | 1.25737e-009 | 3.64557 | E11.5 * Sox10 up vs E11.5 * Ctrl |
| 10485357               | ---          | 0.00328903   | 3.59003 | E11.5 * Sox10 up vs E11.5 * Ctrl |
| 10473125 Itga4         | NM_010576    | 5.2366e-009  | 3.57835 | E11.5 * Sox10 up vs E11.5 * Ctrl |
| 10571865 Scrg1         | NM_009136    | 1.4164e-008  | 3.54266 | E11.5 * Sox10 up vs E11.5 * Ctrl |
| 10425240 Micall1       | NM_177461    | 6.90408e-011 | 3.52916 | E11.5 * Sox10 up vs E11.5 * Ctrl |
| 10385271 Ccng1         | NM_009831    | 5.95932e-012 | 3.51425 | E11.5 * Sox10 up vs E11.5 * Ctrl |
| 10362363 6330407J23Rik | NM_026138    | 8.19392e-011 | 3.51164 | E11.5 * Sox10 up vs E11.5 * Ctrl |
| 10350438 Kcnt2         | NM_001081027 | 6.82205e-008 | 3.49584 | E11.5 * Sox10 up vs E11.5 * Ctrl |
| 10362003 F730021E23Rik | AK155606     | 3.01716e-006 | 3.48545 | E11.5 * Sox10 up vs E11.5 * Ctrl |
| 10373407 Mbc2          | NM_011843    | 2.41706e-009 | 3.46719 | E11.5 * Sox10 up vs E11.5 * Ctrl |
| 10502510 Lmo4          | NM_010723    | 1.02982e-010 | 3.45077 | E11.5 * Sox10 up vs E11.5 * Ctrl |
| 10447056 Qpct          | NM_027455    | 3.36614e-010 | 3.42306 | E11.5 * Sox10 up vs E11.5 * Ctrl |
| 10535956 Stard13       | NM_146258    | 1.46457e-008 | 3.4058  | E11.5 * Sox10 up vs E11.5 * Ctrl |
| 10371578 Ascl1         | NM_008553    | 1.60232e-006 | 3.37418 | E11.5 * Sox10 up vs E11.5 * Ctrl |
| 10604751 Fgf13         | NM_010200    | 5.23065e-008 | 3.36616 | E11.5 * Sox10 up vs E11.5 * Ctrl |
| 10503234 Rlbp11        | NM_028940    | 2.43844e-012 | 3.36471 | E11.5 * Sox10 up vs E11.5 * Ctrl |
| 10350733 Rgs16         | NM_011267    | 2.31812e-007 | 3.35342 | E11.5 * Sox10 up vs E11.5 * Ctrl |
| 10598626 Tspan7        | NM_019634    | 3.13338e-011 | 3.34276 | E11.5 * Sox10 up vs E11.5 * Ctrl |
| 10439651 Cd200         | NM_010818    | 1.35689e-009 | 3.33993 | E11.5 * Sox10 up vs E11.5 * Ctrl |
| 10479698 Myt1          | NM_008665    | 2.7969e-009  | 3.33163 | E11.5 * Sox10 up vs E11.5 * Ctrl |
| 10492341 4631416L12Rik | NM_001081295 | 2.01268e-009 | 3.31969 | E11.5 * Sox10 up vs E11.5 * Ctrl |
| 10503214 Chd7          | NM_001081417 | 1.29187e-009 | 3.30499 | E11.5 * Sox10 up vs E11.5 * Ctrl |
| 10363146 Slc35f1       | NM_178675    | 1.32216e-008 | 3.29566 | E11.5 * Sox10 up vs E11.5 * Ctrl |
| 10549222 Bcat1         | NM_001024468 | 1.32685e-009 | 3.27989 | E11.5 * Sox10 up vs E11.5 * Ctrl |
| 10503218 Chd7          | NM_001081417 | 1.76939e-006 | 3.27963 | E11.5 * Sox10 up vs E11.5 * Ctrl |

|          |           |              |              |         |                                  |
|----------|-----------|--------------|--------------|---------|----------------------------------|
| 10478374 | Gdap1l1   | NM_144891    | 1.62877e-010 | 3.27813 | E11.5 * Sox10 up vs E11.5 * Ctrl |
| 10362538 | Lama4     | NM_010681    | 5.01288e-014 | 3.26558 | E11.5 * Sox10 up vs E11.5 * Ctrl |
| 10344679 | St18      | NM_173868    | 7.24621e-010 | 3.2336  | E11.5 * Sox10 up vs E11.5 * Ctrl |
| 10388430 | Serpinf1  | NM_011340    | 9.24223e-013 | 3.21296 | E11.5 * Sox10 up vs E11.5 * Ctrl |
| 10584674 | Mcam      | NM_023061    | 2.03922e-011 | 3.19261 | E11.5 * Sox10 up vs E11.5 * Ctrl |
| 10487139 | Shc4      | NM_199022    | 5.95917e-012 | 3.18364 | E11.5 * Sox10 up vs E11.5 * Ctrl |
| 10411519 | Mtap1b    | NM_008634    | 4.50387e-011 | 3.17182 | E11.5 * Sox10 up vs E11.5 * Ctrl |
| 10564163 | Snord116  | NR_002895    | 1.81765e-005 | 3.16352 | E11.5 * Sox10 up vs E11.5 * Ctrl |
| 10564167 | Snord116  | NR_002895    | 1.81765e-005 | 3.16352 | E11.5 * Sox10 up vs E11.5 * Ctrl |
| 10564171 | Snord116  | NR_002895    | 1.81765e-005 | 3.16352 | E11.5 * Sox10 up vs E11.5 * Ctrl |
| 10564173 | Snord116  | NR_002895    | 1.81765e-005 | 3.16352 | E11.5 * Sox10 up vs E11.5 * Ctrl |
| 10564175 | Snord116  | NR_002895    | 1.81765e-005 | 3.16352 | E11.5 * Sox10 up vs E11.5 * Ctrl |
| 10564179 | Snord116  | NR_002895    | 1.81765e-005 | 3.16352 | E11.5 * Sox10 up vs E11.5 * Ctrl |
| 10564181 | Snord116  | NR_002895    | 1.81765e-005 | 3.16352 | E11.5 * Sox10 up vs E11.5 * Ctrl |
| 10564185 | Snord116  | NR_002895    | 1.81765e-005 | 3.16352 | E11.5 * Sox10 up vs E11.5 * Ctrl |
| 10564187 | Snord116  | NR_002895    | 1.81765e-005 | 3.16352 | E11.5 * Sox10 up vs E11.5 * Ctrl |
| 10564189 | Snord116  | NR_002895    | 1.81765e-005 | 3.16352 | E11.5 * Sox10 up vs E11.5 * Ctrl |
| 10564191 | Snord116  | NR_002895    | 1.81765e-005 | 3.16352 | E11.5 * Sox10 up vs E11.5 * Ctrl |
| 10564193 | Snord116  | NR_002895    | 1.81765e-005 | 3.16352 | E11.5 * Sox10 up vs E11.5 * Ctrl |
| 10564195 | Snord116  | NR_002895    | 1.81765e-005 | 3.16352 | E11.5 * Sox10 up vs E11.5 * Ctrl |
| 10564197 | Snord116  | NR_002895    | 1.81765e-005 | 3.16352 | E11.5 * Sox10 up vs E11.5 * Ctrl |
| 10564199 | Snord116  | NR_002895    | 1.81765e-005 | 3.16352 | E11.5 * Sox10 up vs E11.5 * Ctrl |
| 10564201 | Snord116  | AF241256     | 1.81765e-005 | 3.16352 | E11.5 * Sox10 up vs E11.5 * Ctrl |
| 10564205 | Snord116  | AF241256     | 1.81765e-005 | 3.16352 | E11.5 * Sox10 up vs E11.5 * Ctrl |
| 10564207 | Snord116  | AF241256     | 1.81765e-005 | 3.16352 | E11.5 * Sox10 up vs E11.5 * Ctrl |
| 10530499 | EG545758  | NM_001024147 | 1.1601e-009  | 3.1553  | E11.5 * Sox10 up vs E11.5 * Ctrl |
| 10416090 | Stmn4     | NM_019675    | 3.10027e-008 | 3.15497 | E11.5 * Sox10 up vs E11.5 * Ctrl |
| 10381154 | Cnp       | NM_009923    | 2.5254e-010  | 3.14199 | E11.5 * Sox10 up vs E11.5 * Ctrl |
| 10465943 | Dagla     | NM_198114    | 2.09954e-007 | 3.1255  | E11.5 * Sox10 up vs E11.5 * Ctrl |
| 10568107 | ---       | ---          | 2.29878e-005 | 3.11343 | E11.5 * Sox10 up vs E11.5 * Ctrl |
| 10471945 | Zeb2      | NM_015753    | 2.15453e-009 | 3.10927 | E11.5 * Sox10 up vs E11.5 * Ctrl |
| 10395702 | Akap6     | NM_198111    | 4.9991e-012  | 3.10829 | E11.5 * Sox10 up vs E11.5 * Ctrl |
| 10514352 | Elavl2    | NM_207685    | 1.39758e-009 | 3.10734 | E11.5 * Sox10 up vs E11.5 * Ctrl |
| 10468722 | Gfra1     | NM_010279    | 2.26765e-010 | 3.10687 | E11.5 * Sox10 up vs E11.5 * Ctrl |
| 10431017 | Till1     | NM_178869    | 6.93095e-012 | 3.1037  | E11.5 * Sox10 up vs E11.5 * Ctrl |
| 10506433 | Dab1      | NM_177259    | 2.38539e-010 | 3.0951  | E11.5 * Sox10 up vs E11.5 * Ctrl |
| 10564161 | Snord116  | NR_002895    | 1.77155e-005 | 3.07992 | E11.5 * Sox10 up vs E11.5 * Ctrl |
| 10503259 | Trp53inp1 | NM_021897    | 2.29862e-011 | 3.07422 | E11.5 * Sox10 up vs E11.5 * Ctrl |
| 10359908 | Rgs4      | NM_009062    | 3.43138e-008 | 3.05718 | E11.5 * Sox10 up vs E11.5 * Ctrl |
| 10573979 | Gnao1     | NM_010308    | 1.71072e-011 | 3.04702 | E11.5 * Sox10 up vs E11.5 * Ctrl |
| 10594447 | Map2k1    | NM_008927    | 2.31394e-011 | 3.03955 | E11.5 * Sox10 up vs E11.5 * Ctrl |
| 10564177 | Snord116  | AF241256     | 2.05805e-005 | 3.03756 | E11.5 * Sox10 up vs E11.5 * Ctrl |
| 10396125 | Atl1      | NM_178628    | 1.56939e-008 | 3.03006 | E11.5 * Sox10 up vs E11.5 * Ctrl |
| 10556509 | Spon1     | NM_145584    | 8.54197e-012 | 2.96533 | E11.5 * Sox10 up vs E11.5 * Ctrl |
| 10503206 | Chd7      | NM_001081417 | 4.27755e-009 | 2.9576  | E11.5 * Sox10 up vs E11.5 * Ctrl |
| 10503200 | Chd7      | NM_001081417 | 1.08528e-008 | 2.9354  | E11.5 * Sox10 up vs E11.5 * Ctrl |
| 10599884 | ---       | ---          | 0.000508496  | 2.93389 | E11.5 * Sox10 up vs E11.5 * Ctrl |
| 10440534 | Adamts5   | NM_011782    | 7.90377e-008 | 2.9333  | E11.5 * Sox10 up vs E11.5 * Ctrl |
| 10430458 | Sox10     | NM_011437    | 7.60788e-008 | 2.92426 | E11.5 * Sox10 up vs E11.5 * Ctrl |
| 10599001 | Agtr2     | NM_007429    | 0.000113313  | 2.91435 | E11.5 * Sox10 up vs E11.5 * Ctrl |
| 10402061 | Eml5      | BC049855     | 1.20032e-007 | 2.91185 | E11.5 * Sox10 up vs E11.5 * Ctrl |
| 10439321 | Slc15a2   | NM_021301    | 6.09197e-005 | 2.9079  | E11.5 * Sox10 up vs E11.5 * Ctrl |
| 10503202 | Chd7      | NM_001081417 | 8.13631e-010 | 2.90528 | E11.5 * Sox10 up vs E11.5 * Ctrl |
| 10404792 | Phactr1   | NM_198419    | 1.92735e-010 | 2.90181 | E11.5 * Sox10 up vs E11.5 * Ctrl |
| 10344973 | Gdap1     | NM_010267    | 4.2064e-007  | 2.89072 | E11.5 * Sox10 up vs E11.5 * Ctrl |
| 10384378 | Ddc       | NM_016672    | 4.27875e-011 | 2.88924 | E11.5 * Sox10 up vs E11.5 * Ctrl |
| 10462683 | Pcgf5     | NM_029508    | 3.54048e-008 | 2.88808 | E11.5 * Sox10 up vs E11.5 * Ctrl |
| 10360418 | Rgs7      | NM_011880    | 1.05137e-007 | 2.88193 | E11.5 * Sox10 up vs E11.5 * Ctrl |
| 10505996 | Fggy      | NM_001113412 | 7.86691e-008 | 2.85606 | E11.5 * Sox10 up vs E11.5 * Ctrl |
| 10492628 | Serpini1  | NM_009250    | 2.05964e-008 | 2.85524 | E11.5 * Sox10 up vs E11.5 * Ctrl |
| 10355984 | Serpine2  | NM_009255    | 1.93179e-013 | 2.85478 | E11.5 * Sox10 up vs E11.5 * Ctrl |
| 10357736 | Nfasc     | NM_182716    | 3.14355e-008 | 2.84222 | E11.5 * Sox10 up vs E11.5 * Ctrl |
| 10439695 | Tagln3    | NM_019754    | 9.91639e-010 | 2.82078 | E11.5 * Sox10 up vs E11.5 * Ctrl |
| 10434845 | Il1rap    | NM_008364    | 5.11139e-011 | 2.82039 | E11.5 * Sox10 up vs E11.5 * Ctrl |
| 10393379 | Mxra7     | NM_026280    | 4.84437e-010 | 2.81329 | E11.5 * Sox10 up vs E11.5 * Ctrl |
| 10440258 | Epha3     | NM_010140    | 8.02197e-013 | 2.81119 | E11.5 * Sox10 up vs E11.5 * Ctrl |

|                        |              |              |         |                                  |
|------------------------|--------------|--------------|---------|----------------------------------|
| 10521498 Crmp1         | NM_007765    | 2.33484e-009 | 2.80994 | E11.5 * Sox10 up vs E11.5 * Ctrl |
| 10503194 Chd7          | NM_001081417 | 3.71317e-007 | 2.80285 | E11.5 * Sox10 up vs E11.5 * Ctrl |
| 10423855 Rims2         | NM_053271    | 3.08325e-009 | 2.79603 | E11.5 * Sox10 up vs E11.5 * Ctrl |
| 10354506 Mfsd6         | NM_133829    | 1.70778e-007 | 2.78993 | E11.5 * Sox10 up vs E11.5 * Ctrl |
| 10422244 Slitrk6       | NM_175499    | 7.07162e-009 | 2.77787 | E11.5 * Sox10 up vs E11.5 * Ctrl |
| 10497663 Slc7a14       | NM_172861    | 4.09329e-009 | 2.76978 | E11.5 * Sox10 up vs E11.5 * Ctrl |
| 10482448 Zeb2          | NM_015753    | 2.97491e-012 | 2.76911 | E11.5 * Sox10 up vs E11.5 * Ctrl |
| 10355836 Resp18        | NM_009049    | 2.2232e-008  | 2.76549 | E11.5 * Sox10 up vs E11.5 * Ctrl |
| 10532753 Coro1c        | NM_011779    | 1.74387e-009 | 2.76363 | E11.5 * Sox10 up vs E11.5 * Ctrl |
| 10501924 Ndst3         | NM_031186    | 6.36321e-009 | 2.75923 | E11.5 * Sox10 up vs E11.5 * Ctrl |
| 10462613 Ifit2         | NM_008332    | 2.9038e-011  | 2.75798 | E11.5 * Sox10 up vs E11.5 * Ctrl |
| 10457963 Gpr17         | NM_001025381 | 1.16143e-007 | 2.75727 | E11.5 * Sox10 up vs E11.5 * Ctrl |
| 10564159 Snord116      | AF241256     | 4.26278e-005 | 2.74214 | E11.5 * Sox10 up vs E11.5 * Ctrl |
| 10503198 Chd7          | NM_001081417 | 4.45609e-008 | 2.73828 | E11.5 * Sox10 up vs E11.5 * Ctrl |
| 10435733 Igsf11        | NM_170599    | 3.46992e-009 | 2.73133 | E11.5 * Sox10 up vs E11.5 * Ctrl |
| 10416175 Nefl          | NM_010910    | 7.04373e-009 | 2.72728 | E11.5 * Sox10 up vs E11.5 * Ctrl |
| 10525016 Tbx3          | NM_011535    | 1.58885e-012 | 2.72507 | E11.5 * Sox10 up vs E11.5 * Ctrl |
| 10572989 Slc10a7       | NM_029736    | 1.2648e-011  | 2.72379 | E11.5 * Sox10 up vs E11.5 * Ctrl |
| 10374197 Ramp3         | NM_019511    | 5.14411e-009 | 2.71099 | E11.5 * Sox10 up vs E11.5 * Ctrl |
| 10408850 Nedd9         | NM_001111324 | 2.08077e-011 | 2.71022 | E11.5 * Sox10 up vs E11.5 * Ctrl |
| 10431697 Abcd2         | NM_011994    | 5.05826e-007 | 2.70918 | E11.5 * Sox10 up vs E11.5 * Ctrl |
| 10494069 Tnrc4         | NM_172434    | 8.86275e-006 | 2.70492 | E11.5 * Sox10 up vs E11.5 * Ctrl |
| 10564183 Snord116      | AF241256     | 4.38386e-005 | 2.7032  | E11.5 * Sox10 up vs E11.5 * Ctrl |
| 10485198 Tspan18       | NM_183180    | 1.26647e-009 | 2.69698 | E11.5 * Sox10 up vs E11.5 * Ctrl |
| 10352092 Zfp238        | NM_001012330 | 2.5825e-010  | 2.68609 | E11.5 * Sox10 up vs E11.5 * Ctrl |
| 10362596 Fyn           | NM_001122893 | 7.1676e-017  | 2.68161 | E11.5 * Sox10 up vs E11.5 * Ctrl |
| 10577190 Rasa3         | NM_009025    | 1.36436e-009 | 2.67359 | E11.5 * Sox10 up vs E11.5 * Ctrl |
| 10430447 1700088E04Rik | NM_138581    | 7.59741e-008 | 2.67096 | E11.5 * Sox10 up vs E11.5 * Ctrl |
| 10539310 Pcgf1         | NM_197992    | 1.43549e-007 | 2.65194 | E11.5 * Sox10 up vs E11.5 * Ctrl |
| 10399973 Hdac9         | NM_024124    | 6.28336e-011 | 2.63992 | E11.5 * Sox10 up vs E11.5 * Ctrl |
| 10588755 Camkv         | NM_145621    | 1.11592e-007 | 2.6364  | E11.5 * Sox10 up vs E11.5 * Ctrl |
| 10553917 Apba2         | NM_007461    | 1.61335e-007 | 2.6189  | E11.5 * Sox10 up vs E11.5 * Ctrl |
| 10603289 Clcn5         | NM_016691    | 2.30749e-012 | 2.6098  | E11.5 * Sox10 up vs E11.5 * Ctrl |
| 10522976 Rufy3         | NM_027530    | 1.15943e-012 | 2.60722 | E11.5 * Sox10 up vs E11.5 * Ctrl |
| 10522285 C330024D21Rik | ENSMUST00000 | 0.00253377   | 2.60557 | E11.5 * Sox10 up vs E11.5 * Ctrl |
| 10458534 Pcdh1         | NM_029357    | 4.6232e-008  | 2.60115 | E11.5 * Sox10 up vs E11.5 * Ctrl |
| 10499138 Dclk2         | NM_027539    | 1.26311e-010 | 2.59986 | E11.5 * Sox10 up vs E11.5 * Ctrl |
| 10500114 Mlft11        | NM_019914    | 1.60715e-011 | 2.59715 | E11.5 * Sox10 up vs E11.5 * Ctrl |
| 10495781 Bcar3         | NM_013867    | 3.36788e-007 | 2.59422 | E11.5 * Sox10 up vs E11.5 * Ctrl |
| 10518947 Ajap1         | NM_001099299 | 5.14658e-009 | 2.59227 | E11.5 * Sox10 up vs E11.5 * Ctrl |
| 10607877 Prps2         | NM_026662    | 6.18491e-010 | 2.5873  | E11.5 * Sox10 up vs E11.5 * Ctrl |
| 10425257 Polr2f        | NM_027231    | 8.82247e-007 | 2.57051 | E11.5 * Sox10 up vs E11.5 * Ctrl |
| 10458645 Ppp2r2b       | NM_028392    | 5.03364e-011 | 2.57008 | E11.5 * Sox10 up vs E11.5 * Ctrl |
| 10365290 Chst11        | NM_021439    | 1.65551e-008 | 2.55863 | E11.5 * Sox10 up vs E11.5 * Ctrl |
| 10503178 Chd7          | NM_001081417 | 2.93839e-010 | 2.5471  | E11.5 * Sox10 up vs E11.5 * Ctrl |
| 10428619 Enpp2         | NM_015744    | 3.25959e-008 | 2.54065 | E11.5 * Sox10 up vs E11.5 * Ctrl |
| 10503212 Chd7          | NM_001081417 | 1.02412e-006 | 2.53968 | E11.5 * Sox10 up vs E11.5 * Ctrl |
| 10546685 Eif4e3        | NM_025829    | 3.19895e-011 | 2.53866 | E11.5 * Sox10 up vs E11.5 * Ctrl |
| 10389590 Gdpd1         | NM_025638    | 2.36828e-009 | 2.53851 | E11.5 * Sox10 up vs E11.5 * Ctrl |
| 10472820 Itga6         | NM_008397    | 3.21586e-009 | 2.53648 | E11.5 * Sox10 up vs E11.5 * Ctrl |
| 10585048 Cadm1         | NM_207675    | 1.01124e-011 | 2.53542 | E11.5 * Sox10 up vs E11.5 * Ctrl |
| 10371332 Aldh1l2       | NM_153543    | 2.92178e-009 | 2.51278 | E11.5 * Sox10 up vs E11.5 * Ctrl |
| 10506360 Sgip1         | NM_144906    | 2.11552e-011 | 2.50072 | E11.5 * Sox10 up vs E11.5 * Ctrl |
| 10424559 Khdrbs3       | NM_010158    | 9.30259e-012 | 2.50017 | E11.5 * Sox10 up vs E11.5 * Ctrl |
| 10448967 Sox8          | NM_011447    | 2.00581e-008 | 2.49864 | E11.5 * Sox10 up vs E11.5 * Ctrl |
| 10415132 Cmtm5         | NM_026066    | 3.72455e-009 | 2.49521 | E11.5 * Sox10 up vs E11.5 * Ctrl |
| 10568668 Adam12        | NM_007400    | 1.57656e-008 | 2.49343 | E11.5 * Sox10 up vs E11.5 * Ctrl |
| 10490665 Stmn3         | NM_009133    | 1.8278e-008  | 2.49255 | E11.5 * Sox10 up vs E11.5 * Ctrl |
| 10481711 Stxbp1        | NM_001113569 | 6.45469e-009 | 2.4911  | E11.5 * Sox10 up vs E11.5 * Ctrl |
| 10492021 Postn         | NM_015784    | 1.69491e-009 | 2.48911 | E11.5 * Sox10 up vs E11.5 * Ctrl |
| 10507840 Heyl          | NM_013905    | 1.5551e-006  | 2.48445 | E11.5 * Sox10 up vs E11.5 * Ctrl |
| 10455826 Megf10        | NM_001001979 | 1.51058e-007 | 2.47828 | E11.5 * Sox10 up vs E11.5 * Ctrl |
| 10594301 Coro2b        | NM_175484    | 4.18788e-008 | 2.47238 | E11.5 * Sox10 up vs E11.5 * Ctrl |
| 10503222 Chd7          | NM_001081417 | 6.11386e-009 | 2.47054 | E11.5 * Sox10 up vs E11.5 * Ctrl |
| 10555027 Gab2          | NM_010248    | 5.84695e-011 | 2.46857 | E11.5 * Sox10 up vs E11.5 * Ctrl |
| 10564165 Snord116      | AF241256     | 0.000139768  | 2.46855 | E11.5 * Sox10 up vs E11.5 * Ctrl |

|          |               |              |              |         |                                  |
|----------|---------------|--------------|--------------|---------|----------------------------------|
| 10479950 | Cugbp2        | NM_001110231 | 1.34035e-011 | 2.45452 | E11.5 * Sox10 up vs E11.5 * Ctrl |
| 10503176 | Chd7          | NM_001081417 | 3.74838e-009 | 2.45338 | E11.5 * Sox10 up vs E11.5 * Ctrl |
| 10521602 | Cpeb2         | NM_175937    | 5.71868e-007 | 2.45079 | E11.5 * Sox10 up vs E11.5 * Ctrl |
| 10403604 | Lyst          | NM_010748    | 2.28085e-010 | 2.44121 | E11.5 * Sox10 up vs E11.5 * Ctrl |
| 10385391 | Cyfp2         | NM_133769    | 1.22112e-009 | 2.43925 | E11.5 * Sox10 up vs E11.5 * Ctrl |
| 10468992 | Frmd4a        | NM_172475    | 3.25112e-010 | 2.439   | E11.5 * Sox10 up vs E11.5 * Ctrl |
| 10538482 | Adcyap1r1     | NM_007407    | 9.16724e-008 | 2.4329  | E11.5 * Sox10 up vs E11.5 * Ctrl |
| 10492165 | ---           | ---          | 3.10988e-005 | 2.42132 | E11.5 * Sox10 up vs E11.5 * Ctrl |
| 10418835 | Slc18a3       | NM_021712    | 7.44609e-006 | 2.41736 | E11.5 * Sox10 up vs E11.5 * Ctrl |
| 10574166 | Cpne2         | NM_153507    | 1.5169e-010  | 2.40879 | E11.5 * Sox10 up vs E11.5 * Ctrl |
| 10503196 | Chd7          | NM_001081417 | 2.85869e-008 | 2.408   | E11.5 * Sox10 up vs E11.5 * Ctrl |
| 10399360 | Rhob          | NM_007483    | 1.33582e-008 | 2.40675 | E11.5 * Sox10 up vs E11.5 * Ctrl |
| 10503208 | Chd7          | NM_001081417 | 1.22002e-007 | 2.40312 | E11.5 * Sox10 up vs E11.5 * Ctrl |
| 10503180 | Chd7          | NM_001081417 | 1.53593e-008 | 2.40271 | E11.5 * Sox10 up vs E11.5 * Ctrl |
| 10454369 | Rhod3         | NM_175276    | 3.47903e-008 | 2.39608 | E11.5 * Sox10 up vs E11.5 * Ctrl |
| 10531437 | Scarb2        | NM_007644    | 9.93544e-009 | 2.39222 | E11.5 * Sox10 up vs E11.5 * Ctrl |
| 10548051 | Kcna6         | NM_013568    | 4.83485e-008 | 2.39119 | E11.5 * Sox10 up vs E11.5 * Ctrl |
| 10417798 | Kcnk5         | NM_021542    | 4.37557e-007 | 2.38826 | E11.5 * Sox10 up vs E11.5 * Ctrl |
| 10503220 | Chd7          | NM_001081417 | 6.12023e-007 | 2.38733 | E11.5 * Sox10 up vs E11.5 * Ctrl |
| 10498710 | Bche          | NM_009738    | 1.66697e-007 | 2.38636 | E11.5 * Sox10 up vs E11.5 * Ctrl |
| 10562532 | Zfp536        | NM_172385    | 2.78642e-008 | 2.38457 | E11.5 * Sox10 up vs E11.5 * Ctrl |
| 10503172 | Chd7          | NM_001081417 | 0.000137491  | 2.38436 | E11.5 * Sox10 up vs E11.5 * Ctrl |
| 10567289 | Syt17         | NM_138649    | 1.20363e-008 | 2.37333 | E11.5 * Sox10 up vs E11.5 * Ctrl |
| 10457606 | Kctd1         | NM_134112    | 5.77809e-008 | 2.37252 | E11.5 * Sox10 up vs E11.5 * Ctrl |
| 10457644 | Cdh2          | NM_007664    | 8.82979e-013 | 2.37119 | E11.5 * Sox10 up vs E11.5 * Ctrl |
| 10566723 | Lmo1          | NM_057173    | 3.36058e-010 | 2.36436 | E11.5 * Sox10 up vs E11.5 * Ctrl |
| 10570516 | Kbtbd11       | NM_029116    | 5.37278e-011 | 2.36066 | E11.5 * Sox10 up vs E11.5 * Ctrl |
| 10422537 | Nalcn         | NM_177393    | 6.98227e-009 | 2.36003 | E11.5 * Sox10 up vs E11.5 * Ctrl |
| 10503216 | Chd7          | NM_001081417 | 4.32706e-009 | 2.35838 | E11.5 * Sox10 up vs E11.5 * Ctrl |
| 10423358 | March11       | NM_177597    | 0.000554442  | 2.3505  | E11.5 * Sox10 up vs E11.5 * Ctrl |
| 10595371 | Hmgn3         | NM_026122    | 1.21495e-007 | 2.34392 | E11.5 * Sox10 up vs E11.5 * Ctrl |
| 10446553 | Epb4.1l3      | NM_013813    | 8.69233e-012 | 2.34093 | E11.5 * Sox10 up vs E11.5 * Ctrl |
| 10358587 | Hmcn1         | NM_001024720 | 2.75489e-005 | 2.33864 | E11.5 * Sox10 up vs E11.5 * Ctrl |
| 10602068 | Mid2          | NM_011845    | 1.67081e-010 | 2.33466 | E11.5 * Sox10 up vs E11.5 * Ctrl |
| 10406434 | Mef2c         | NM_025282    | 5.73966e-011 | 2.3339  | E11.5 * Sox10 up vs E11.5 * Ctrl |
| 10602805 | Mtap7d2       | NM_001081124 | 1.71123e-008 | 2.33005 | E11.5 * Sox10 up vs E11.5 * Ctrl |
| 10523758 | Lrrc8b        | NM_001033550 | 3.54346e-008 | 2.3219  | E11.5 * Sox10 up vs E11.5 * Ctrl |
| 10486201 | OTTMUSG00000  | ENSMUST00000 | 3.39156e-006 | 2.31245 | E11.5 * Sox10 up vs E11.5 * Ctrl |
| 10519612 | 9330182L06Rik | NM_172706    | 8.31918e-008 | 2.30872 | E11.5 * Sox10 up vs E11.5 * Ctrl |
| 10503190 | Chd7          | NM_001081417 | 5.60767e-008 | 2.30798 | E11.5 * Sox10 up vs E11.5 * Ctrl |
| 10407481 | Pfkp          | NM_019703    | 2.56275e-008 | 2.30296 | E11.5 * Sox10 up vs E11.5 * Ctrl |
| 10397002 | Sipa1l1       | NM_172579    | 1.27494e-009 | 2.30133 | E11.5 * Sox10 up vs E11.5 * Ctrl |
| 10545538 | Ctnna2        | NM_009819    | 1.60142e-007 | 2.29762 | E11.5 * Sox10 up vs E11.5 * Ctrl |
| 10544906 | Ggct          | NM_026637    | 3.96802e-008 | 2.29553 | E11.5 * Sox10 up vs E11.5 * Ctrl |
| 10476628 | Otor          | NM_020595    | 2.99128e-007 | 2.29398 | E11.5 * Sox10 up vs E11.5 * Ctrl |
| 10345777 | Il1r12        | NM_133193    | 5.51812e-006 | 2.29123 | E11.5 * Sox10 up vs E11.5 * Ctrl |
| 10553537 | Luzp2         | NM_178705    | 7.45986e-006 | 2.28956 | E11.5 * Sox10 up vs E11.5 * Ctrl |
| 10607156 | Dcx           | NM_001110222 | 2.20306e-007 | 2.28758 | E11.5 * Sox10 up vs E11.5 * Ctrl |
| 10503166 | Chd7          | NM_001081417 | 6.77308e-006 | 2.28652 | E11.5 * Sox10 up vs E11.5 * Ctrl |
| 10556463 | Arntl         | NM_007489    | 1.60883e-009 | 2.28391 | E11.5 * Sox10 up vs E11.5 * Ctrl |
| 10353632 | Bai3          | NM_175642    | 6.86045e-009 | 2.28192 | E11.5 * Sox10 up vs E11.5 * Ctrl |
| 10366043 | Dusp6         | NM_026268    | 1.95265e-006 | 2.28119 | E11.5 * Sox10 up vs E11.5 * Ctrl |
| 10503210 | Chd7          | NM_001081417 | 1.82489e-007 | 2.28058 | E11.5 * Sox10 up vs E11.5 * Ctrl |
| 10383309 | ---           | ---          | 0.000321492  | 2.27939 | E11.5 * Sox10 up vs E11.5 * Ctrl |
| 10426244 | Mapk8ip2      | NM_021921    | 1.43583e-006 | 2.27213 | E11.5 * Sox10 up vs E11.5 * Ctrl |
| 10457820 | Nol4          | NM_199024    | 2.83266e-007 | 2.27203 | E11.5 * Sox10 up vs E11.5 * Ctrl |
| 10410547 | Nkd2          | NM_028186    | 4.91241e-007 | 2.2713  | E11.5 * Sox10 up vs E11.5 * Ctrl |
| 10399505 | Greb1         | NM_015764    | 1.33421e-007 | 2.26937 | E11.5 * Sox10 up vs E11.5 * Ctrl |
| 10375313 | Ccnj1         | NM_001045530 | 3.7533e-008  | 2.2685  | E11.5 * Sox10 up vs E11.5 * Ctrl |
| 10472984 | Hoxd3         | NM_010468    | 2.23504e-008 | 2.26495 | E11.5 * Sox10 up vs E11.5 * Ctrl |
| 10485745 | Ano3          | NM_001128103 | 0.000114088  | 2.2554  | E11.5 * Sox10 up vs E11.5 * Ctrl |
| 10500802 | Atg4a         | NM_174875    | 1.52692e-006 | 2.24327 | E11.5 * Sox10 up vs E11.5 * Ctrl |
| 10361807 | Hivep2        | NM_010437    | 6.99415e-007 | 2.24034 | E11.5 * Sox10 up vs E11.5 * Ctrl |
| 10503184 | Chd7          | NM_001081417 | 2.43076e-010 | 2.23923 | E11.5 * Sox10 up vs E11.5 * Ctrl |
| 10542414 | Ptpro         | NM_011216    | 1.52504e-007 | 2.23082 | E11.5 * Sox10 up vs E11.5 * Ctrl |
| 10493798 | S100a16       | NM_026416    | 3.74636e-007 | 2.22651 | E11.5 * Sox10 up vs E11.5 * Ctrl |

|          |               |              |              |         |                                  |
|----------|---------------|--------------|--------------|---------|----------------------------------|
| 10452571 | Ptprm         | NM_008984    | 1.82581e-007 | 2.22024 | E11.5 * Sox10 up vs E11.5 * Ctrl |
| 10501971 | Ank2          | NM_178655    | 9.84001e-010 | 2.21546 | E11.5 * Sox10 up vs E11.5 * Ctrl |
| 10355456 | Mreg          | NM_001005423 | 1.18113e-006 | 2.21288 | E11.5 * Sox10 up vs E11.5 * Ctrl |
| 10607089 | Acs14         | NM_207625    | 1.43359e-008 | 2.20921 | E11.5 * Sox10 up vs E11.5 * Ctrl |
| 10349826 | ENSMUSG00000  | ENSMUST00000 | 0.000447663  | 2.20551 | E11.5 * Sox10 up vs E11.5 * Ctrl |
| 10591706 | Elavl3        | NM_010487    | 1.02935e-006 | 2.20127 | E11.5 * Sox10 up vs E11.5 * Ctrl |
| 10603051 | Ap1s2         | NM_026887    | 5.82185e-005 | 2.19843 | E11.5 * Sox10 up vs E11.5 * Ctrl |
| 10503182 | Chd7          | NM_001081417 | 2.34807e-010 | 2.19201 | E11.5 * Sox10 up vs E11.5 * Ctrl |
| 10518751 | Car6          | NM_009802    | 0.000335354  | 2.18872 | E11.5 * Sox10 up vs E11.5 * Ctrl |
| 10564169 | Snord116      | AF241256     | 0.000377637  | 2.18859 | E11.5 * Sox10 up vs E11.5 * Ctrl |
| 10555197 | Mtap6         | NM_010837    | 3.20197e-009 | 2.18197 | E11.5 * Sox10 up vs E11.5 * Ctrl |
| 10497673 | Zmat3         | NM_009517    | 1.65202e-007 | 2.17721 | E11.5 * Sox10 up vs E11.5 * Ctrl |
| 10348493 | Lrrfip1       | NM_008515    | 5.95187e-011 | 2.17704 | E11.5 * Sox10 up vs E11.5 * Ctrl |
| 10360920 | Tgfb2         | NM_009367    | 6.27399e-015 | 2.16896 | E11.5 * Sox10 up vs E11.5 * Ctrl |
| 10368997 | C130030K03Rik | AK048022     | 0.00143082   | 2.16828 | E11.5 * Sox10 up vs E11.5 * Ctrl |
| 10394593 | Fam49a        | NM_029758    | 4.09693e-007 | 2.16607 | E11.5 * Sox10 up vs E11.5 * Ctrl |
| 10345241 | Dst           | NM_134448    | 7.10839e-012 | 2.16437 | E11.5 * Sox10 up vs E11.5 * Ctrl |
| 10440522 | Adamts1       | NM_009621    | 7.81028e-009 | 2.16381 | E11.5 * Sox10 up vs E11.5 * Ctrl |
| 10476759 | Rin2          | NM_028724    | 3.2517e-008  | 2.16128 | E11.5 * Sox10 up vs E11.5 * Ctrl |
| 10358535 | Hmcn1         | NM_001024720 | 8.08789e-007 | 2.15851 | E11.5 * Sox10 up vs E11.5 * Ctrl |
| 10461057 | Rcor2         | NM_054048    | 2.98831e-006 | 2.15661 | E11.5 * Sox10 up vs E11.5 * Ctrl |
| 10595013 | Tmod2         | NM_016711    | 7.29885e-010 | 2.15638 | E11.5 * Sox10 up vs E11.5 * Ctrl |
| 10422227 | Spry2         | NM_011897    | 7.12523e-008 | 2.15268 | E11.5 * Sox10 up vs E11.5 * Ctrl |
| 10503186 | Chd7          | NM_001081417 | 4.63503e-009 | 2.15094 | E11.5 * Sox10 up vs E11.5 * Ctrl |
| 10574350 | Mmp15         | NM_008609    | 2.79327e-007 | 2.14375 | E11.5 * Sox10 up vs E11.5 * Ctrl |
| 10593497 | Zc3h12c       | ENSMUST00000 | 2.97408e-007 | 2.14224 | E11.5 * Sox10 up vs E11.5 * Ctrl |
| 10575019 | ENSMUSG00000  | ENSMUST00000 | 0.00231203   | 2.1367  | E11.5 * Sox10 up vs E11.5 * Ctrl |
| 10587299 | Ick           | NM_019987    | 4.84829e-010 | 2.13669 | E11.5 * Sox10 up vs E11.5 * Ctrl |
| 10605431 | Rab39b        | NM_175122    | 1.08482e-006 | 2.13508 | E11.5 * Sox10 up vs E11.5 * Ctrl |
| 10598996 | EG331392      | NM_198633    | 2.92141e-007 | 2.13036 | E11.5 * Sox10 up vs E11.5 * Ctrl |
| 10552075 | Lgi4          | NM_144556    | 1.7421e-007  | 2.12805 | E11.5 * Sox10 up vs E11.5 * Ctrl |
| 10350136 | Csrp1         | NM_007791    | 4.93155e-008 | 2.12511 | E11.5 * Sox10 up vs E11.5 * Ctrl |
| 10358557 | Hmcn1         | NM_001024720 | 1.90825e-006 | 2.12366 | E11.5 * Sox10 up vs E11.5 * Ctrl |
| 10527158 | Fscn1         | NM_007984    | 0.000244416  | 2.11828 | E11.5 * Sox10 up vs E11.5 * Ctrl |
| 10518585 | Kif1b         | NM_207682    | 1.19769e-010 | 2.11542 | E11.5 * Sox10 up vs E11.5 * Ctrl |
| 10363455 | Pcbd1         | NM_025273    | 5.91175e-007 | 2.11355 | E11.5 * Sox10 up vs E11.5 * Ctrl |
| 10607113 | Rgs3          | NM_134257    | 1.95435e-007 | 2.11279 | E11.5 * Sox10 up vs E11.5 * Ctrl |
| 10490129 | Bmp7          | NM_007557    | 1.2244e-007  | 2.11193 | E11.5 * Sox10 up vs E11.5 * Ctrl |
| 10358547 | Hmcn1         | NM_001024720 | 2.66412e-005 | 2.11165 | E11.5 * Sox10 up vs E11.5 * Ctrl |
| 10497817 | Anxa5         | NM_009673    | 8.22706e-009 | 2.10705 | E11.5 * Sox10 up vs E11.5 * Ctrl |
| 10408359 | Nrsn1         | NM_009513    | 2.17593e-006 | 2.10564 | E11.5 * Sox10 up vs E11.5 * Ctrl |
| 10470564 | Ralgds        | NM_001145835 | 8.04957e-007 | 2.10461 | E11.5 * Sox10 up vs E11.5 * Ctrl |
| 10458685 | Jakmip2       | ENSMUST00000 | 2.02969e-005 | 2.10383 | E11.5 * Sox10 up vs E11.5 * Ctrl |
| 10535866 | Ubl3          | NM_011908    | 3.94323e-011 | 2.10212 | E11.5 * Sox10 up vs E11.5 * Ctrl |
| 10375265 | Atp10b        | NM_176999    | 9.47984e-008 | 2.09708 | E11.5 * Sox10 up vs E11.5 * Ctrl |
| 10540227 | Kbtbd8        | NM_001008785 | 2.01144e-005 | 2.09669 | E11.5 * Sox10 up vs E11.5 * Ctrl |
| 10518484 | Fbxo44        | NM_173401    | 5.50795e-008 | 2.09326 | E11.5 * Sox10 up vs E11.5 * Ctrl |
| 10582580 | ---           | ---          | 0.000161498  | 2.08881 | E11.5 * Sox10 up vs E11.5 * Ctrl |
| 10564211 | Snrpn         | NM_013670    | 1.48642e-011 | 2.08436 | E11.5 * Sox10 up vs E11.5 * Ctrl |
| 10460118 | Socs6         | NM_018821    | 1.84406e-007 | 2.08403 | E11.5 * Sox10 up vs E11.5 * Ctrl |
| 10358525 | Hmcn1         | NM_001024720 | 9.90032e-007 | 2.0766  | E11.5 * Sox10 up vs E11.5 * Ctrl |
| 10474064 | Trp53i11      | NM_001025246 | 1.9895e-005  | 2.07398 | E11.5 * Sox10 up vs E11.5 * Ctrl |
| 10399421 | Mycn          | NM_008709    | 5.36004e-008 | 2.0731  | E11.5 * Sox10 up vs E11.5 * Ctrl |
| 10356712 | Kif1a         | NM_008440    | 2.53058e-009 | 2.07085 | E11.5 * Sox10 up vs E11.5 * Ctrl |
| 10520527 | Dpysl5        | NM_023047    | 2.1541e-007  | 2.07011 | E11.5 * Sox10 up vs E11.5 * Ctrl |
| 10496727 | Ddah1         | NM_026993    | 2.69499e-009 | 2.06975 | E11.5 * Sox10 up vs E11.5 * Ctrl |
| 10432540 | Lima1         | NM_001113545 | 1.82744e-011 | 2.06902 | E11.5 * Sox10 up vs E11.5 * Ctrl |
| 10577586 | Ap3m2         | NM_001122820 | 7.56392e-009 | 2.06814 | E11.5 * Sox10 up vs E11.5 * Ctrl |
| 10466410 | Psat1         | NM_177420    | 2.09982e-008 | 2.06764 | E11.5 * Sox10 up vs E11.5 * Ctrl |
| 10372338 | EG368203      | NM_203660    | 0.000283142  | 2.06714 | E11.5 * Sox10 up vs E11.5 * Ctrl |
| 10407072 | Elovi7        | NM_029001    | 5.77012e-005 | 2.0657  | E11.5 * Sox10 up vs E11.5 * Ctrl |
| 10466976 | Gldc          | NM_138595    | 9.21042e-008 | 2.06378 | E11.5 * Sox10 up vs E11.5 * Ctrl |
| 10406817 | Enc1          | NM_007930    | 1.6355e-008  | 2.06368 | E11.5 * Sox10 up vs E11.5 * Ctrl |
| 10566668 | Socs6         | NM_018821    | 0.000103469  | 2.06056 | E11.5 * Sox10 up vs E11.5 * Ctrl |
| 10501456 | Fam102b       | ENSMUST00000 | 3.7877e-008  | 2.05941 | E11.5 * Sox10 up vs E11.5 * Ctrl |
| 10455942 | A730017C20Rik | NM_173759    | 1.89447e-006 | 2.055   | E11.5 * Sox10 up vs E11.5 * Ctrl |

|                        |              |              |         |                                  |
|------------------------|--------------|--------------|---------|----------------------------------|
| 10549200 Sox5          | NM_011444    | 3.07179e-007 | 2.0545  | E11.5 * Sox10 up vs E11.5 * Ctrl |
| 10503902 Cnr1          | NM_007726    | 5.81664e-007 | 2.05337 | E11.5 * Sox10 up vs E11.5 * Ctrl |
| 10421810 1190002H23Rik | NM_025427    | 2.624e-007   | 2.05261 | E11.5 * Sox10 up vs E11.5 * Ctrl |
| 10602090 Atg4a         | NM_174875    | 5.93693e-007 | 2.04926 | E11.5 * Sox10 up vs E11.5 * Ctrl |
| 10492826 Fbxw7         | NM_080428    | 4.07368e-011 | 2.04918 | E11.5 * Sox10 up vs E11.5 * Ctrl |
| 10452734 Alk           | NM_007439    | 2.86926e-008 | 2.04862 | E11.5 * Sox10 up vs E11.5 * Ctrl |
| 10498210 Nbea          | NM_030595    | 1.95937e-011 | 2.04817 | E11.5 * Sox10 up vs E11.5 * Ctrl |
| 10490559 Chrna4        | NM_015730    | 4.91565e-006 | 2.03996 | E11.5 * Sox10 up vs E11.5 * Ctrl |
| 10503174 Chd7          | NM_001081417 | 7.0244e-008  | 2.03915 | E11.5 * Sox10 up vs E11.5 * Ctrl |
| 10503188 Chd7          | NM_001081417 | 3.41158e-006 | 2.03882 | E11.5 * Sox10 up vs E11.5 * Ctrl |
| 10538356 Chn2          | NM_023543    | 1.79931e-007 | 2.03359 | E11.5 * Sox10 up vs E11.5 * Ctrl |
| 10595496 Snap91        | NM_013669    | 3.56733e-006 | 2.03    | E11.5 * Sox10 up vs E11.5 * Ctrl |
| 10499093               | ---          | 2.48055e-006 | 2.02848 | E11.5 * Sox10 up vs E11.5 * Ctrl |
| 10406456 AY512938      | AY512938     | 0.000131238  | 2.02812 | E11.5 * Sox10 up vs E11.5 * Ctrl |
| 10494735 Gdap2         | NM_010269    | 2.77136e-007 | 2.02369 | E11.5 * Sox10 up vs E11.5 * Ctrl |
| 10495285 Sort1         | NM_019972    | 2.47966e-010 | 2.02269 | E11.5 * Sox10 up vs E11.5 * Ctrl |
| 10365471 Fbxo7         | NM_153195    | 8.03913e-010 | 2.01677 | E11.5 * Sox10 up vs E11.5 * Ctrl |
| 10412066 Rab3c         | NM_023852    | 1.76728e-006 | 2.01097 | E11.5 * Sox10 up vs E11.5 * Ctrl |
| 10421100 Nefm          | NM_008691    | 3.88777e-010 | 2.00735 | E11.5 * Sox10 up vs E11.5 * Ctrl |
| 10495623 ENSMUSG00000  | ENSMUST00000 | 0.000240809  | 2.00455 | E11.5 * Sox10 up vs E11.5 * Ctrl |
| 10503204 Chd7          | NM_001081417 | 3.7069e-007  | 2.00316 | E11.5 * Sox10 up vs E11.5 * Ctrl |
| 10392910 C630004H02Rik | BC024617     | 0.00012033   | 2.00299 | E11.5 * Sox10 up vs E11.5 * Ctrl |
| 10469138 4930412O13Rik | NR_024257    | 0.000298248  | 2.0007  | E11.5 * Sox10 up vs E11.5 * Ctrl |
| 10358577 Hmcn1         | NM_001024720 | 2.11941e-005 | 1.99838 | E11.5 * Sox10 up vs E11.5 * Ctrl |
| 10548735 Dusp16        | NM_130447    | 6.04733e-010 | 1.99644 | E11.5 * Sox10 up vs E11.5 * Ctrl |
| 10594652 Lactb         | NM_030717    | 7.00417e-006 | 1.99551 | E11.5 * Sox10 up vs E11.5 * Ctrl |
| 10593492 Zc3h12c       | AK220416     | 2.73226e-010 | 1.99508 | E11.5 * Sox10 up vs E11.5 * Ctrl |
| 10399457 Akr1b3        | NM_009658    | 9.47114e-009 | 1.99327 | E11.5 * Sox10 up vs E11.5 * Ctrl |
| 10347781 9430031J16Rik | BC082310     | 1.53734e-006 | 1.99287 | E11.5 * Sox10 up vs E11.5 * Ctrl |
| 10564482 Synm          | NM_201639    | 9.0395e-009  | 1.97983 | E11.5 * Sox10 up vs E11.5 * Ctrl |
| 10462918 Tmem20        | NM_175507    | 1.69055e-009 | 1.97874 | E11.5 * Sox10 up vs E11.5 * Ctrl |
| 10534960 Gje1          | NM_080450    | 0.000117206  | 1.97618 | E11.5 * Sox10 up vs E11.5 * Ctrl |
| 10436623 Chodl         | NM_139134    | 0.000312077  | 1.97608 | E11.5 * Sox10 up vs E11.5 * Ctrl |
| 10418895 Zfp488        | NM_001013777 | 7.17356e-008 | 1.97293 | E11.5 * Sox10 up vs E11.5 * Ctrl |
| 10556553 Insc          | NM_173767    | 8.58547e-007 | 1.9723  | E11.5 * Sox10 up vs E11.5 * Ctrl |
| 10467139 Lipa          | NM_021460    | 9.53134e-009 | 1.96696 | E11.5 * Sox10 up vs E11.5 * Ctrl |
| 10601152 Nlgn3         | NM_172932    | 2.52865e-008 | 1.96426 | E11.5 * Sox10 up vs E11.5 * Ctrl |
| 10359480 Dnm3          | NM_001038619 | 3.92813e-007 | 1.96399 | E11.5 * Sox10 up vs E11.5 * Ctrl |
| 10582582               | ---          | 0.00831065   | 1.96174 | E11.5 * Sox10 up vs E11.5 * Ctrl |
| 10582584               | ---          | 0.00831065   | 1.96174 | E11.5 * Sox10 up vs E11.5 * Ctrl |
| 10404975 Id4           | NM_031166    | 2.29482e-007 | 1.96102 | E11.5 * Sox10 up vs E11.5 * Ctrl |
| 10526191 Gatsl2        | BC026208     | 1.00182e-006 | 1.96095 | E11.5 * Sox10 up vs E11.5 * Ctrl |
| 10428857 Mtss1         | NM_001146180 | 1.254e-008   | 1.95913 | E11.5 * Sox10 up vs E11.5 * Ctrl |
| 10481845 Fam125b       | BC059907     | 1.23799e-007 | 1.95615 | E11.5 * Sox10 up vs E11.5 * Ctrl |
| 10397912 9030205A07Rik | AB257853     | 3.27118e-008 | 1.9558  | E11.5 * Sox10 up vs E11.5 * Ctrl |
| 10448925 Cacna1h       | NM_021415    | 1.49874e-006 | 1.9558  | E11.5 * Sox10 up vs E11.5 * Ctrl |
| 10358549 Hmcn1         | NM_001024720 | 3.69866e-006 | 1.95444 | E11.5 * Sox10 up vs E11.5 * Ctrl |
| 10358613 Hmcn1         | NM_001024720 | 1.04794e-005 | 1.95393 | E11.5 * Sox10 up vs E11.5 * Ctrl |
| 10436456 Pros1         | NM_011173    | 2.9622e-007  | 1.9527  | E11.5 * Sox10 up vs E11.5 * Ctrl |
| 10503170 Chd7          | NM_001081417 | 1.85755e-009 | 1.95221 | E11.5 * Sox10 up vs E11.5 * Ctrl |
| 10471424 Fam102a       | NM_153560    | 2.19014e-006 | 1.95078 | E11.5 * Sox10 up vs E11.5 * Ctrl |
| 10503192 Chd7          | NM_001081417 | 8.25719e-007 | 1.94264 | E11.5 * Sox10 up vs E11.5 * Ctrl |
| 10595298 Filip1        | NM_001081243 | 6.01437e-005 | 1.94157 | E11.5 * Sox10 up vs E11.5 * Ctrl |
| 10407841 Hecw1         | NM_001081348 | 8.87033e-005 | 1.93859 | E11.5 * Sox10 up vs E11.5 * Ctrl |
| 10362186 Moxd1         | NM_021509    | 4.53292e-005 | 1.93755 | E11.5 * Sox10 up vs E11.5 * Ctrl |
| 10497920 Ankrd50       | NM_001033198 | 2.02261e-009 | 1.93647 | E11.5 * Sox10 up vs E11.5 * Ctrl |
| 10347036 Mtap2         | NM_001039934 | 6.87967e-010 | 1.93505 | E11.5 * Sox10 up vs E11.5 * Ctrl |
| 10599654 Cxx1c         | NM_028375    | 2.59951e-006 | 1.93479 | E11.5 * Sox10 up vs E11.5 * Ctrl |
| 10358521 Hmcn1         | NM_001024720 | 0.000565918  | 1.93478 | E11.5 * Sox10 up vs E11.5 * Ctrl |
| 10370242 Pcbp3         | NM_021568    | 2.2695e-008  | 1.93313 | E11.5 * Sox10 up vs E11.5 * Ctrl |
| 10436978 Cbr3          | NM_173047    | 0.000414487  | 1.93222 | E11.5 * Sox10 up vs E11.5 * Ctrl |
| 10448081 Rgmb          | NM_178615    | 3.49297e-011 | 1.92751 | E11.5 * Sox10 up vs E11.5 * Ctrl |
| 10403413 Idi1          | NM_145360    | 0.000367848  | 1.92068 | E11.5 * Sox10 up vs E11.5 * Ctrl |
| 10374406 Cnrip1        | NM_029861    | 5.24098e-008 | 1.91944 | E11.5 * Sox10 up vs E11.5 * Ctrl |
| 10458555 Spry4         | NM_011898    | 2.54934e-006 | 1.91926 | E11.5 * Sox10 up vs E11.5 * Ctrl |
| 10355974 Wdfy1         | NM_001111279 | 5.77765e-008 | 1.91649 | E11.5 * Sox10 up vs E11.5 * Ctrl |

|                        |              |              |         |                                  |
|------------------------|--------------|--------------|---------|----------------------------------|
| 10391084 Hap1          | NM_010404    | 5.53947e-007 | 1.91555 | E11.5 * Sox10 up vs E11.5 * Ctrl |
| 10455374 Stk32a        | NM_178749    | 3.33285e-007 | 1.91486 | E11.5 * Sox10 up vs E11.5 * Ctrl |
| 10565570 4632434I11Rik | NM_001080995 | 2.09346e-006 | 1.91034 | E11.5 * Sox10 up vs E11.5 * Ctrl |
| 10462702 Hectd2        | NM_172637    | 4.70055e-006 | 1.90913 | E11.5 * Sox10 up vs E11.5 * Ctrl |
| 10358597 Hmcn1         | NM_001024720 | 5.74468e-005 | 1.90749 | E11.5 * Sox10 up vs E11.5 * Ctrl |
| 10381939 Tanc2         | NM_181071    | 3.95405e-008 | 1.90655 | E11.5 * Sox10 up vs E11.5 * Ctrl |
| 10492335 Rap2b         | NM_028712    | 2.95129e-008 | 1.90342 | E11.5 * Sox10 up vs E11.5 * Ctrl |
| 10509127 Fuca1         | NM_024243    | 1.00057e-007 | 1.90234 | E11.5 * Sox10 up vs E11.5 * Ctrl |
| 10366391 Kcnc2         | NM_001025581 | 1.91185e-006 | 1.89938 | E11.5 * Sox10 up vs E11.5 * Ctrl |
| 10456237 Stsias3       | NM_009182    | 6.75141e-006 | 1.89775 | E11.5 * Sox10 up vs E11.5 * Ctrl |
| 10474373 Kcna4         | NM_021275    | 9.44713e-005 | 1.89773 | E11.5 * Sox10 up vs E11.5 * Ctrl |
| 10557992 Bag3          | NM_013863    | 3.61748e-008 | 1.89632 | E11.5 * Sox10 up vs E11.5 * Ctrl |
| 10588509 Pcbp4         | NM_021567    | 0.000234644  | 1.89545 | E11.5 * Sox10 up vs E11.5 * Ctrl |
| 10425265 ENSMUSG00000  | ENSMUST00000 | 5.56527e-005 | 1.89519 | E11.5 * Sox10 up vs E11.5 * Ctrl |
| 10358555 Hmcn1         | NM_001024720 | 9.07266e-006 | 1.8934  | E11.5 * Sox10 up vs E11.5 * Ctrl |
| 10454286 Mapre2        | NM_153058    | 3.07438e-010 | 1.89308 | E11.5 * Sox10 up vs E11.5 * Ctrl |
| 10459671 Dcc           | NM_007831    | 1.29953e-008 | 1.89251 | E11.5 * Sox10 up vs E11.5 * Ctrl |
| 10577315 Angpt2        | NM_007426    | 4.10095e-008 | 1.89136 | E11.5 * Sox10 up vs E11.5 * Ctrl |
| 10485402 Fjx1          | NM_010218    | 1.04136e-010 | 1.88904 | E11.5 * Sox10 up vs E11.5 * Ctrl |
| 10472893 B230120H23Rik | NM_023057    | 7.63984e-007 | 1.88882 | E11.5 * Sox10 up vs E11.5 * Ctrl |
| 10362005 Ahi1          | NM_026203    | 7.76454e-007 | 1.88868 | E11.5 * Sox10 up vs E11.5 * Ctrl |
| 10427496 Egflam        | NM_178748    | 9.73721e-009 | 1.88593 | E11.5 * Sox10 up vs E11.5 * Ctrl |
| 10567546 Crym          | NM_016669    | 1.38354e-007 | 1.88435 | E11.5 * Sox10 up vs E11.5 * Ctrl |
| 10415784 Trim13        | NM_023233    | 0.000297246  | 1.8839  | E11.5 * Sox10 up vs E11.5 * Ctrl |
| 10485309 E530001K10Rik | ENSMUST00000 | 0.000835833  | 1.8834  | E11.5 * Sox10 up vs E11.5 * Ctrl |
| 10491780 Hspa4l        | NM_011020    | 6.96698e-006 | 1.8828  | E11.5 * Sox10 up vs E11.5 * Ctrl |
| 10513061 Cttnal1       | NM_018761    | 1.25894e-008 | 1.88011 | E11.5 * Sox10 up vs E11.5 * Ctrl |
| 10420988 Dpysl2        | NM_009955    | 1.7811e-005  | 1.8762  | E11.5 * Sox10 up vs E11.5 * Ctrl |
| 10506452 AY512949      | AY512949     | 0.000180523  | 1.8736  | E11.5 * Sox10 up vs E11.5 * Ctrl |
| 10406852 Cnn3          | NM_028044    | 5.4667e-005  | 1.87237 | E11.5 * Sox10 up vs E11.5 * Ctrl |
| 10514466 Jun           | NM_010591    | 5.75912e-005 | 1.86881 | E11.5 * Sox10 up vs E11.5 * Ctrl |
| 10591853 Tbx20         | NM_194263    | 1.1064e-005  | 1.86204 | E11.5 * Sox10 up vs E11.5 * Ctrl |
| 10503168 Chd7          | NM_001081417 | 3.05323e-007 | 1.86195 | E11.5 * Sox10 up vs E11.5 * Ctrl |
| 10357590 Dyrk3         | NM_145508    | 1.38414e-005 | 1.86182 | E11.5 * Sox10 up vs E11.5 * Ctrl |
| 10367746 Sash1         | NM_175155    | 9.6173e-008  | 1.861   | E11.5 * Sox10 up vs E11.5 * Ctrl |
| 10540233 Fam19a1       | NM_182808    | 3.75694e-006 | 1.8588  | E11.5 * Sox10 up vs E11.5 * Ctrl |
| 10505008 Slc44a1       | NM_133891    | 6.28435e-010 | 1.85623 | E11.5 * Sox10 up vs E11.5 * Ctrl |
| 10358633 Hmcn1         | NM_001024720 | 0.000206872  | 1.85424 | E11.5 * Sox10 up vs E11.5 * Ctrl |
| 10590383 Deb1          | NM_026794    | 1.0852e-008  | 1.85395 | E11.5 * Sox10 up vs E11.5 * Ctrl |
| 10598071               | ---          | 0.00130496   | 1.84951 | E11.5 * Sox10 up vs E11.5 * Ctrl |
| 10358635 Hmcn1         | NM_001024720 | 4.72402e-005 | 1.84499 | E11.5 * Sox10 up vs E11.5 * Ctrl |
| 10549594 Ttyh1         | NM_021324    | 3.03089e-008 | 1.8448  | E11.5 * Sox10 up vs E11.5 * Ctrl |
| 10378855 Ssh2          | ENSMUST00000 | 0.00556045   | 1.84242 | E11.5 * Sox10 up vs E11.5 * Ctrl |
| 10606174 Nap1l2        | NM_008671    | 0.000128094  | 1.84168 | E11.5 * Sox10 up vs E11.5 * Ctrl |
| 10553773 Gabrb3        | NM_008071    | 1.26028e-007 | 1.83902 | E11.5 * Sox10 up vs E11.5 * Ctrl |
| 10372557 Gm239         | NM_001033333 | 1.05238e-005 | 1.83044 | E11.5 * Sox10 up vs E11.5 * Ctrl |
| 10607302 Gnl3l         | NM_198110    | 6.97903e-010 | 1.83023 | E11.5 * Sox10 up vs E11.5 * Ctrl |
| 10425945 Fbln1         | NM_010180    | 2.11048e-006 | 1.8284  | E11.5 * Sox10 up vs E11.5 * Ctrl |
| 10350697 Nmnat2        | NM_175460    | 8.71497e-006 | 1.82796 | E11.5 * Sox10 up vs E11.5 * Ctrl |
| 10358533 Hmcn1         | NM_001024720 | 6.56566e-006 | 1.82381 | E11.5 * Sox10 up vs E11.5 * Ctrl |
| 10504518 Polr1e        | NM_022811    | 8.51622e-009 | 1.82242 | E11.5 * Sox10 up vs E11.5 * Ctrl |
| 10576639 Nrp1          | NM_008737    | 2.03984e-007 | 1.82158 | E11.5 * Sox10 up vs E11.5 * Ctrl |
| 10454580 Bin1          | NM_009668    | 2.93169e-005 | 1.82139 | E11.5 * Sox10 up vs E11.5 * Ctrl |
| 10571312 Dusp4         | NM_176933    | 2.31885e-005 | 1.82033 | E11.5 * Sox10 up vs E11.5 * Ctrl |
| 10368227 Ube2q2        | NM_180600    | 1.80269e-007 | 1.81861 | E11.5 * Sox10 up vs E11.5 * Ctrl |
| 10594048 Islr2         | NM_177193    | 6.80538e-006 | 1.8175  | E11.5 * Sox10 up vs E11.5 * Ctrl |
| 10571815 Gpm6a         | NM_153581    | 0.00013693   | 1.8173  | E11.5 * Sox10 up vs E11.5 * Ctrl |
| 10482762 Idi1          | NM_145360    | 0.000208667  | 1.81632 | E11.5 * Sox10 up vs E11.5 * Ctrl |
| 10358531 Hmcn1         | NM_001024720 | 2.51085e-005 | 1.81315 | E11.5 * Sox10 up vs E11.5 * Ctrl |
| 10476443 Plcb4         | NM_013829    | 7.85889e-008 | 1.8126  | E11.5 * Sox10 up vs E11.5 * Ctrl |
| 10469151 Itih5         | NM_172471    | 6.7998e-008  | 1.81229 | E11.5 * Sox10 up vs E11.5 * Ctrl |
| 10508651 Sdc3          | NM_011520    | 6.40653e-006 | 1.81141 | E11.5 * Sox10 up vs E11.5 * Ctrl |
| 10598833 Chst7         | NM_021715    | 0.000416643  | 1.81079 | E11.5 * Sox10 up vs E11.5 * Ctrl |
| 10438017 Fgd4          | NM_139232    | 1.2791e-006  | 1.80864 | E11.5 * Sox10 up vs E11.5 * Ctrl |
| 10378833 Ssh2          | NM_177710    | 8.19647e-008 | 1.80584 | E11.5 * Sox10 up vs E11.5 * Ctrl |
| 10595831 Zbtb38        | NM_175537    | 1.15614e-006 | 1.80367 | E11.5 * Sox10 up vs E11.5 * Ctrl |

|                        |              |              |         |                                  |
|------------------------|--------------|--------------|---------|----------------------------------|
| 10488387 Napb          | NM_019632    | 3.81631e-007 | 1.80348 | E11.5 * Sox10 up vs E11.5 * Ctrl |
| 10358637 Hmcn1         | NM_001024720 | 9.3891e-006  | 1.80329 | E11.5 * Sox10 up vs E11.5 * Ctrl |
| 10419288 Gch1          | NM_008102    | 2.29702e-006 | 1.80234 | E11.5 * Sox10 up vs E11.5 * Ctrl |
| 10358529 Hmcn1         | NM_001024720 | 5.1213e-006  | 1.80121 | E11.5 * Sox10 up vs E11.5 * Ctrl |
| 10476355 Chgb          | NM_007694    | 8.00325e-005 | 1.79915 | E11.5 * Sox10 up vs E11.5 * Ctrl |
| 10582162 Cntl1         | NM_028071    | 0.000688234  | 1.79895 | E11.5 * Sox10 up vs E11.5 * Ctrl |
| 10408613 Tubb2b        | NM_023716    | 8.34231e-005 | 1.79733 | E11.5 * Sox10 up vs E11.5 * Ctrl |
| 10439092 1700021K19Rik | BC060601     | 5.20962e-008 | 1.79733 | E11.5 * Sox10 up vs E11.5 * Ctrl |
| 10350951 Tnr           | NM_022312    | 5.11929e-006 | 1.79486 | E11.5 * Sox10 up vs E11.5 * Ctrl |
| 10416887 Slain1        | NM_198014    | 2.64228e-005 | 1.79486 | E11.5 * Sox10 up vs E11.5 * Ctrl |
| 10581914 Chst5         | NM_019950    | 8.24854e-007 | 1.79331 | E11.5 * Sox10 up vs E11.5 * Ctrl |
| 10595392 Elovl4        | NM_148941    | 0.000202723  | 1.79276 | E11.5 * Sox10 up vs E11.5 * Ctrl |
| 10441456 Synj2         | NM_011523    | 2.43581e-007 | 1.79245 | E11.5 * Sox10 up vs E11.5 * Ctrl |
| 10449034 Fam173a       | BC096050     | 5.62478e-007 | 1.78876 | E11.5 * Sox10 up vs E11.5 * Ctrl |
| 10421526 Rb1           | NM_009029    | 1.13823e-006 | 1.78793 | E11.5 * Sox10 up vs E11.5 * Ctrl |
| 10596812 6230427J02Rik | NM_026597    | 3.91126e-007 | 1.78695 | E11.5 * Sox10 up vs E11.5 * Ctrl |
| 10504234 Unc13b        | NM_001081413 | 3.19543e-008 | 1.7868  | E11.5 * Sox10 up vs E11.5 * Ctrl |
| 10516932 Sesn2         | NM_144907    | 3.60576e-005 | 1.78621 | E11.5 * Sox10 up vs E11.5 * Ctrl |
| 10585494 Ube2q2        | NM_180600    | 8.6035e-008  | 1.78612 | E11.5 * Sox10 up vs E11.5 * Ctrl |
| 10501963 Ugt8a         | NM_011674    | 0.000452719  | 1.78595 | E11.5 * Sox10 up vs E11.5 * Ctrl |
| 10414417 Peli2         | NM_033602    | 2.02876e-007 | 1.78451 | E11.5 * Sox10 up vs E11.5 * Ctrl |
| 10371092 Atcay         | NM_178662    | 4.81947e-005 | 1.78449 | E11.5 * Sox10 up vs E11.5 * Ctrl |
| 10596200 Tmem108       | NM_178638    | 0.000844192  | 1.78268 | E11.5 * Sox10 up vs E11.5 * Ctrl |
| 10568651 Dhx32         | NM_133941    | 1.88898e-007 | 1.78265 | E11.5 * Sox10 up vs E11.5 * Ctrl |
| 10409660 Gkap1         | NM_019832    | 3.94224e-005 | 1.77772 | E11.5 * Sox10 up vs E11.5 * Ctrl |
| 10368981 Lin28b        | NM_001031772 | 1.38257e-006 | 1.77769 | E11.5 * Sox10 up vs E11.5 * Ctrl |
| 10408838 Elovl2        | NM_019423    | 1.54109e-005 | 1.77727 | E11.5 * Sox10 up vs E11.5 * Ctrl |
| 10471675 Glo1          | NM_025374    | 3.9725e-006  | 1.77388 | E11.5 * Sox10 up vs E11.5 * Ctrl |
| 10415911 Kif13b        | NM_001081177 | 5.66651e-006 | 1.77251 | E11.5 * Sox10 up vs E11.5 * Ctrl |
| 10522655 C530008M17Rik | ENSMUST00000 | 0.00336662   | 1.77073 | E11.5 * Sox10 up vs E11.5 * Ctrl |
| 10358601 Hmcn1         | NM_001024720 | 4.29181e-005 | 1.768   | E11.5 * Sox10 up vs E11.5 * Ctrl |
| 10474814 Disp2         | NM_170593    | 3.7125e-005  | 1.7673  | E11.5 * Sox10 up vs E11.5 * Ctrl |
| 10409021 Tpmt          | NM_016785    | 8.39044e-007 | 1.76695 | E11.5 * Sox10 up vs E11.5 * Ctrl |
| 10453518 Nrxn1         | NM_020252    | 6.63246e-005 | 1.76624 | E11.5 * Sox10 up vs E11.5 * Ctrl |
| 10438626 Etv5          | NM_023794    | 2.42682e-005 | 1.76523 | E11.5 * Sox10 up vs E11.5 * Ctrl |
| 10474467 Muc15         | NM_172979    | 0.00431602   | 1.7646  | E11.5 * Sox10 up vs E11.5 * Ctrl |
| 10596148 Trf           | NM_133977    | 7.09727e-007 | 1.76415 | E11.5 * Sox10 up vs E11.5 * Ctrl |
| 10389581 Ypel2         | NM_001005341 | 9.69209e-008 | 1.76391 | E11.5 * Sox10 up vs E11.5 * Ctrl |
| 10582275 Slc7a5        | NM_011404    | 0.000280573  | 1.76383 | E11.5 * Sox10 up vs E11.5 * Ctrl |
| 10392388 Prkca         | NM_011101    | 1.41948e-007 | 1.76214 | E11.5 * Sox10 up vs E11.5 * Ctrl |
| 10358551 Hmcn1         | NM_001024720 | 6.31058e-005 | 1.7612  | E11.5 * Sox10 up vs E11.5 * Ctrl |
| 10564262 Mkrr3         | NM_011746    | 0.000151016  | 1.76009 | E11.5 * Sox10 up vs E11.5 * Ctrl |
| 10514561 E130114P18Rik | ENSMUST00000 | 1.60447e-005 | 1.75823 | E11.5 * Sox10 up vs E11.5 * Ctrl |
| 10354494 Nab1          | NM_008667    | 9.80434e-007 | 1.75801 | E11.5 * Sox10 up vs E11.5 * Ctrl |
| 10368101 D10Bwg1379e   | NM_001033258 | 1.10376e-006 | 1.7563  | E11.5 * Sox10 up vs E11.5 * Ctrl |
| 10358575 Hmcn1         | NM_001024720 | 3.02107e-005 | 1.75559 | E11.5 * Sox10 up vs E11.5 * Ctrl |
| 10358648 Hmcn1         | NM_001024720 | 3.62925e-005 | 1.75514 | E11.5 * Sox10 up vs E11.5 * Ctrl |
| 10451679 Daam2         | NM_001008231 | 1.77844e-006 | 1.75352 | E11.5 * Sox10 up vs E11.5 * Ctrl |
| 10464583 Gstp1         | NM_013541    | 2.75615e-006 | 1.75127 | E11.5 * Sox10 up vs E11.5 * Ctrl |
| 10499091 Dear1         | NM_001040461 | 1.4161e-005  | 1.75002 | E11.5 * Sox10 up vs E11.5 * Ctrl |
| 10603316 2010204K13Rik | AF038507     | 9.97935e-007 | 1.74939 | E11.5 * Sox10 up vs E11.5 * Ctrl |
| 10578521 Snx25         | NM_207213    | 2.44811e-007 | 1.7486  | E11.5 * Sox10 up vs E11.5 * Ctrl |
| 10590844 9030420J04Rik | BC137891     | 8.48079e-008 | 1.74844 | E11.5 * Sox10 up vs E11.5 * Ctrl |
| 10433445 Abat          | NM_172961    | 8.82007e-005 | 1.74769 | E11.5 * Sox10 up vs E11.5 * Ctrl |
| 10392943 Hn1           | NM_008258    | 1.24603e-006 | 1.74611 | E11.5 * Sox10 up vs E11.5 * Ctrl |
| 10356020 Dock10        | NM_175291    | 1.36981e-005 | 1.74604 | E11.5 * Sox10 up vs E11.5 * Ctrl |
| 10543859 Akr1b3        | NM_009658    | 3.33623e-009 | 1.74386 | E11.5 * Sox10 up vs E11.5 * Ctrl |
| 10558001 Inpp5f        | NM_178641    | 7.82617e-007 | 1.73951 | E11.5 * Sox10 up vs E11.5 * Ctrl |
| 10469577 ENSMUSG0000C  | ENSMUST00000 | 0.00012346   | 1.73935 | E11.5 * Sox10 up vs E11.5 * Ctrl |
| 10439009 Apod          | NM_007470    | 2.41117e-005 | 1.7383  | E11.5 * Sox10 up vs E11.5 * Ctrl |
| 10503161 Chd7          | NM_001081417 | 4.00151e-008 | 1.73793 | E11.5 * Sox10 up vs E11.5 * Ctrl |
| 10592471 Gramd1b       | NM_172768    | 3.88008e-006 | 1.7379  | E11.5 * Sox10 up vs E11.5 * Ctrl |
| 10563303 Bax           | NM_007527    | 1.67515e-006 | 1.73741 | E11.5 * Sox10 up vs E11.5 * Ctrl |
| 10495854 Prss12        | NM_008939    | 2.75986e-007 | 1.73695 | E11.5 * Sox10 up vs E11.5 * Ctrl |
| 10441565 Rps6ka2       | NM_011299    | 9.6352e-007  | 1.73695 | E11.5 * Sox10 up vs E11.5 * Ctrl |
| 10392056 Cyb561        | NM_007805    | 4.3389e-005  | 1.7352  | E11.5 * Sox10 up vs E11.5 * Ctrl |

|          |               |              |              |         |                                  |
|----------|---------------|--------------|--------------|---------|----------------------------------|
| 10426656 | Prph          | NM_013639    | 3.22017e-006 | 1.73498 | E11.5 * Sox10 up vs E11.5 * Ctrl |
| 10430519 | Csnk1e        | NM_013767    | 1.45885e-006 | 1.73495 | E11.5 * Sox10 up vs E11.5 * Ctrl |
| 10358605 | Hmcn1         | NM_001024720 | 1.54042e-005 | 1.73481 | E11.5 * Sox10 up vs E11.5 * Ctrl |
| 10391146 | Acly          | NM_134037    | 8.54817e-006 | 1.73463 | E11.5 * Sox10 up vs E11.5 * Ctrl |
| 10464283 | ENSMUSG00000  | ENSMUST00000 | 1.4315e-006  | 1.73443 | E11.5 * Sox10 up vs E11.5 * Ctrl |
| 10354768 | Akr1b3        | NM_009658    | 2.68763e-009 | 1.73356 | E11.5 * Sox10 up vs E11.5 * Ctrl |
| 10520304 | Actr3b        | NM_001004365 | 1.04825e-005 | 1.73346 | E11.5 * Sox10 up vs E11.5 * Ctrl |
| 10412038 | Zswim6        | NM_145456    | 1.11785e-009 | 1.73205 | E11.5 * Sox10 up vs E11.5 * Ctrl |
| 10399470 | Trib2         | NM_144551    | 1.39385e-007 | 1.73119 | E11.5 * Sox10 up vs E11.5 * Ctrl |
| 10421046 | Dock5         | NM_177780    | 2.24081e-009 | 1.7288  | E11.5 * Sox10 up vs E11.5 * Ctrl |
| 10483719 | Chn1          | NM_001113246 | 6.65749e-008 | 1.72464 | E11.5 * Sox10 up vs E11.5 * Ctrl |
| 10571860 | Hand2         | NM_010402    | 3.62542e-007 | 1.72452 | E11.5 * Sox10 up vs E11.5 * Ctrl |
| 10358607 | Hmcn1         | NM_001024720 | 6.49967e-006 | 1.72381 | E11.5 * Sox10 up vs E11.5 * Ctrl |
| 10599120 | Dock11        | NM_001009947 | 9.92168e-007 | 1.72213 | E11.5 * Sox10 up vs E11.5 * Ctrl |
| 10350896 | Astn1         | NM_007495    | 3.06686e-006 | 1.72195 | E11.5 * Sox10 up vs E11.5 * Ctrl |
| 10369783 | Zfp365        | NM_178679    | 3.55396e-007 | 1.72128 | E11.5 * Sox10 up vs E11.5 * Ctrl |
| 10603706 | Med4          | NM_026119    | 8.56454e-005 | 1.72093 | E11.5 * Sox10 up vs E11.5 * Ctrl |
| 10358595 | Hmcn1         | NM_001024720 | 0.000103558  | 1.72044 | E11.5 * Sox10 up vs E11.5 * Ctrl |
| 10495316 | Psrc1         | NM_019976    | 7.16321e-006 | 1.72022 | E11.5 * Sox10 up vs E11.5 * Ctrl |
| 10496091 | Lef1          | NM_010703    | 2.98747e-006 | 1.71769 | E11.5 * Sox10 up vs E11.5 * Ctrl |
| 10519949 | A630072M18Rik | BC020055     | 0.000599991  | 1.71752 | E11.5 * Sox10 up vs E11.5 * Ctrl |
| 10498284 | Vwtr1         | NM_133784    | 6.09017e-008 | 1.71685 | E11.5 * Sox10 up vs E11.5 * Ctrl |
| 10595805 | Rasa2         | NM_053268    | 4.28373e-007 | 1.71655 | E11.5 * Sox10 up vs E11.5 * Ctrl |
| 10540333 | Cntn6         | NM_017383    | 6.50657e-005 | 1.71593 | E11.5 * Sox10 up vs E11.5 * Ctrl |
| 10358599 | Hmcn1         | NM_001024720 | 0.000112263  | 1.7157  | E11.5 * Sox10 up vs E11.5 * Ctrl |
| 10494200 | Cdc42se1      | NM_172395    | 4.22126e-006 | 1.71555 | E11.5 * Sox10 up vs E11.5 * Ctrl |
| 10533633 | Diablo        | NM_023232    | 9.9446e-009  | 1.71394 | E11.5 * Sox10 up vs E11.5 * Ctrl |
| 10593245 | Htr3b         | NM_020274    | 7.22144e-005 | 1.7115  | E11.5 * Sox10 up vs E11.5 * Ctrl |
| 10434165 | Arvcf         | NM_033474    | 1.60182e-006 | 1.70807 | E11.5 * Sox10 up vs E11.5 * Ctrl |
| 10379936 | Tbx2          | NM_009324    | 6.54312e-005 | 1.70761 | E11.5 * Sox10 up vs E11.5 * Ctrl |
| 10528527 | Fam126a       | NM_053090    | 5.72527e-007 | 1.70353 | E11.5 * Sox10 up vs E11.5 * Ctrl |
| 10435769 | Zbtb20        | NM_019778    | 3.04663e-007 | 1.70321 | E11.5 * Sox10 up vs E11.5 * Ctrl |
| 10600688 | Map3k7ip3     | NM_025729    | 8.3936e-007  | 1.7022  | E11.5 * Sox10 up vs E11.5 * Ctrl |
| 10474141 | Slc1a2        | NM_001077514 | 1.47608e-005 | 1.70193 | E11.5 * Sox10 up vs E11.5 * Ctrl |
| 10358579 | Hmcn1         | NM_001024720 | 2.50085e-005 | 1.69913 | E11.5 * Sox10 up vs E11.5 * Ctrl |
| 10407792 | Gpr137b-ps    | NR_003568    | 0.00190528   | 1.6981  | E11.5 * Sox10 up vs E11.5 * Ctrl |
| 10404848 | Jarid2        | NM_021878    | 3.76336e-010 | 1.69728 | E11.5 * Sox10 up vs E11.5 * Ctrl |
| 10521467 | Ccdc96        | NM_025725    | 9.83961e-006 | 1.69569 | E11.5 * Sox10 up vs E11.5 * Ctrl |
| 10553897 | Mttnr10       | NM_172742    | 0.000109938  | 1.69242 | E11.5 * Sox10 up vs E11.5 * Ctrl |
| 10588037 | Rbp1          | NM_011254    | 5.12321e-008 | 1.6923  | E11.5 * Sox10 up vs E11.5 * Ctrl |
| 10408047 | Zfp389        | NR_026798    | 0.000804498  | 1.69177 | E11.5 * Sox10 up vs E11.5 * Ctrl |
| 10549842 | Zfp667        | NM_001024928 | 9.93653e-006 | 1.6917  | E11.5 * Sox10 up vs E11.5 * Ctrl |
| 10578493 | Tlr3          | NM_126166    | 0.000264385  | 1.6903  | E11.5 * Sox10 up vs E11.5 * Ctrl |
| 10400357 | Baz1a         | NM_013815    | 7.18452e-006 | 1.68953 | E11.5 * Sox10 up vs E11.5 * Ctrl |
| 10449644 | Glo1          | NM_025374    | 2.97334e-007 | 1.68913 | E11.5 * Sox10 up vs E11.5 * Ctrl |
| 10355225 | ENSMUSG00000  | ENSMUST00000 | 8.71022e-005 | 1.68868 | E11.5 * Sox10 up vs E11.5 * Ctrl |
| 10541260 | Cecr2         | NM_001128151 | 5.22628e-005 | 1.68852 | E11.5 * Sox10 up vs E11.5 * Ctrl |
| 10473244 | Zfp804a       | NM_175513    | 1.00486e-005 | 1.68799 | E11.5 * Sox10 up vs E11.5 * Ctrl |
| 10480329 | Dnajc1        | NM_007869    | 6.55909e-006 | 1.68791 | E11.5 * Sox10 up vs E11.5 * Ctrl |
| 10358490 | Hmcn1         | NM_001024720 | 1.32881e-006 | 1.68482 | E11.5 * Sox10 up vs E11.5 * Ctrl |
| 10468311 | Sh3pxd2a      | NM_008018    | 2.81996e-005 | 1.6848  | E11.5 * Sox10 up vs E11.5 * Ctrl |
| 10396476 | Rhoj          | NM_023275    | 1.31144e-005 | 1.68475 | E11.5 * Sox10 up vs E11.5 * Ctrl |
| 10588283 | Rab6b         | NM_173781    | 0.000508102  | 1.68405 | E11.5 * Sox10 up vs E11.5 * Ctrl |
| 10351259 | Slc19a2       | NM_054087    | 0.000589291  | 1.68266 | E11.5 * Sox10 up vs E11.5 * Ctrl |
| 10381250 | Tubg1         | NM_134024    | 4.39696e-005 | 1.68223 | E11.5 * Sox10 up vs E11.5 * Ctrl |
| 10358581 | Hmcn1         | NM_001024720 | 8.10734e-005 | 1.68213 | E11.5 * Sox10 up vs E11.5 * Ctrl |
| 10395414 | Tmem195       | NM_178767    | 0.00103351   | 1.68185 | E11.5 * Sox10 up vs E11.5 * Ctrl |
| 10359917 | Hsd17b7       | NM_010476    | 0.000361985  | 1.68172 | E11.5 * Sox10 up vs E11.5 * Ctrl |
| 10593671 | Dmxl2         | NM_172771    | 2.12012e-007 | 1.68109 | E11.5 * Sox10 up vs E11.5 * Ctrl |
| 10347970 | Cab39         | NM_133781    | 6.35359e-009 | 1.6795  | E11.5 * Sox10 up vs E11.5 * Ctrl |
| 10462005 | Tmem2         | NM_031997    | 9.02747e-008 | 1.67902 | E11.5 * Sox10 up vs E11.5 * Ctrl |
| 10543145 | Thsd7a        | ENSMUST00000 | 2.25195e-006 | 1.67847 | E11.5 * Sox10 up vs E11.5 * Ctrl |
| 10575777 | 4933407C03Rik | BC158118     | 4.23758e-006 | 1.67776 | E11.5 * Sox10 up vs E11.5 * Ctrl |
| 10527306 | Lmtk2         | NM_001081109 | 1.64986e-007 | 1.67634 | E11.5 * Sox10 up vs E11.5 * Ctrl |
| 10445879 | Kcnh8         | NM_001031811 | 0.00042495   | 1.67588 | E11.5 * Sox10 up vs E11.5 * Ctrl |
| 10363130 | Gopc          | NM_053187    | 0.000500355  | 1.67578 | E11.5 * Sox10 up vs E11.5 * Ctrl |

|          |               |              |              |         |                                  |
|----------|---------------|--------------|--------------|---------|----------------------------------|
| 10406856 | Gm807         | ENSMUST00000 | 4.51795e-005 | 1.67426 | E11.5 * Sox10 up vs E11.5 * Ctrl |
| 10358609 | Hmcn1         | NM_001024720 | 4.82975e-005 | 1.67421 | E11.5 * Sox10 up vs E11.5 * Ctrl |
| 10493114 | Nes           | NM_016701    | 0.00099055   | 1.674   | E11.5 * Sox10 up vs E11.5 * Ctrl |
| 10354472 | Gls           | NM_001081081 | 0.000190209  | 1.67153 | E11.5 * Sox10 up vs E11.5 * Ctrl |
| 10518408 | Plod1         | NM_011122    | 4.73181e-005 | 1.67078 | E11.5 * Sox10 up vs E11.5 * Ctrl |
| 10350742 | Rnasel        | NM_011882    | 0.000978161  | 1.66992 | E11.5 * Sox10 up vs E11.5 * Ctrl |
| 10380341 | Spag9         | NM_027569    | 6.93098e-009 | 1.66938 | E11.5 * Sox10 up vs E11.5 * Ctrl |
| 10358652 | Hmcn1         | NM_001024720 | 8.59631e-006 | 1.66896 | E11.5 * Sox10 up vs E11.5 * Ctrl |
| 10449041 | Metrn         | NM_133719    | 5.60494e-005 | 1.66879 | E11.5 * Sox10 up vs E11.5 * Ctrl |
| 10605820 | Zc4h2         | NM_001003916 | 4.98723e-007 | 1.66715 | E11.5 * Sox10 up vs E11.5 * Ctrl |
| 10536805 | Fam71f1       | NM_207258    | 1.37233e-005 | 1.66668 | E11.5 * Sox10 up vs E11.5 * Ctrl |
| 10579925 | Gab1          | NM_021356    | 2.24318e-008 | 1.66509 | E11.5 * Sox10 up vs E11.5 * Ctrl |
| 10374106 | Ykt6          | NM_019661    | 0.000120077  | 1.66476 | E11.5 * Sox10 up vs E11.5 * Ctrl |
| 10415332 | Rec8          | NM_020002    | 3.29933e-007 | 1.66474 | E11.5 * Sox10 up vs E11.5 * Ctrl |
| 10483604 | Slc25a12      | NM_172436    | 2.97312e-006 | 1.66445 | E11.5 * Sox10 up vs E11.5 * Ctrl |
| 10527229 | 2810453106Rik | NM_026050    | 2.0974e-006  | 1.66236 | E11.5 * Sox10 up vs E11.5 * Ctrl |
| 10358571 | Hmcn1         | NM_001024720 | 4.57432e-005 | 1.6603  | E11.5 * Sox10 up vs E11.5 * Ctrl |
| 10482059 | Ggta1         | NM_010283    | 3.67679e-005 | 1.65963 | E11.5 * Sox10 up vs E11.5 * Ctrl |
| 10475643 | Fgf7          | NM_008008    | 0.00135912   | 1.65899 | E11.5 * Sox10 up vs E11.5 * Ctrl |
| 10481056 | Notch1        | NM_008714    | 0.000164295  | 1.65839 | E11.5 * Sox10 up vs E11.5 * Ctrl |
| 10381934 | Tanc2         | NM_181071    | 7.96911e-005 | 1.65829 | E11.5 * Sox10 up vs E11.5 * Ctrl |
| 10447502 | Adcyap1       | NM_009625    | 0.000190818  | 1.65827 | E11.5 * Sox10 up vs E11.5 * Ctrl |
| 10566767 | St5           | NM_001001326 | 6.17664e-006 | 1.65814 | E11.5 * Sox10 up vs E11.5 * Ctrl |
| 10451167 | Tmem63b       | NM_198167    | 9.45873e-006 | 1.65776 | E11.5 * Sox10 up vs E11.5 * Ctrl |
| 10481272 | 1700007K13Rik | BC099566     | 4.2932e-005  | 1.65716 | E11.5 * Sox10 up vs E11.5 * Ctrl |
| 10442887 | Fbxl16        | BC132383     | 0.000137762  | 1.65601 | E11.5 * Sox10 up vs E11.5 * Ctrl |
| 10394611 | Nbas          | ENSMUST00000 | 3.19461e-007 | 1.65576 | E11.5 * Sox10 up vs E11.5 * Ctrl |
| 10358565 | Hmcn1         | NM_001024720 | 0.000226286  | 1.65524 | E11.5 * Sox10 up vs E11.5 * Ctrl |
| 10518147 | Pdpm          | NM_010329    | 0.000301135  | 1.65466 | E11.5 * Sox10 up vs E11.5 * Ctrl |
| 10469322 | Vim           | NM_011701    | 3.81508e-010 | 1.65348 | E11.5 * Sox10 up vs E11.5 * Ctrl |
| 10452295 | Tubb4         | NM_009451    | 0.00018155   | 1.65331 | E11.5 * Sox10 up vs E11.5 * Ctrl |
| 10385236 | Akr1b3        | NM_009658    | 3.03058e-008 | 1.65231 | E11.5 * Sox10 up vs E11.5 * Ctrl |
| 10352503 | Bpnt1         | NM_011794    | 3.02663e-005 | 1.6516  | E11.5 * Sox10 up vs E11.5 * Ctrl |
| 10451838 | Slc5a7        | NM_022025    | 0.000219725  | 1.64864 | E11.5 * Sox10 up vs E11.5 * Ctrl |
| 10493519 | Shc1          | NM_001113331 | 0.00119609   | 1.64859 | E11.5 * Sox10 up vs E11.5 * Ctrl |
| 10528143 | Ppp1r14b      | NM_008889    | 3.42715e-009 | 1.64744 | E11.5 * Sox10 up vs E11.5 * Ctrl |
| 10375263 | ENSMUSG00000  | ENSMUST00000 | 0.00167386   | 1.64711 | E11.5 * Sox10 up vs E11.5 * Ctrl |
| 10362829 | Ostm1         | NM_172416    | 4.25289e-006 | 1.6464  | E11.5 * Sox10 up vs E11.5 * Ctrl |
| 10566846 | Dennd5a       | NM_021494    | 3.14877e-009 | 1.64432 | E11.5 * Sox10 up vs E11.5 * Ctrl |
| 10384138 | Tmed4         | NM_134020    | 0.000268167  | 1.64401 | E11.5 * Sox10 up vs E11.5 * Ctrl |
| 10575775 | 4933407C03Rik | BC158118     | 2.35092e-006 | 1.6438  | E11.5 * Sox10 up vs E11.5 * Ctrl |
| 10468762 | 4930506M07Rik | NM_001114312 | 3.26215e-005 | 1.64364 | E11.5 * Sox10 up vs E11.5 * Ctrl |
| 10375432 | C030019I05Rik | NM_177075    | 0.00224261   | 1.64364 | E11.5 * Sox10 up vs E11.5 * Ctrl |
| 10593668 | Dmxl2         | NM_172771    | 9.00354e-005 | 1.6403  | E11.5 * Sox10 up vs E11.5 * Ctrl |
| 10550316 | Tmem160       | NM_026938    | 5.05442e-007 | 1.63929 | E11.5 * Sox10 up vs E11.5 * Ctrl |
| 10377018 | Myh3          | NM_001099635 | 7.67431e-008 | 1.63851 | E11.5 * Sox10 up vs E11.5 * Ctrl |
| 10426016 | Gtse1         | NM_013882    | 1.98954e-007 | 1.63763 | E11.5 * Sox10 up vs E11.5 * Ctrl |
| 10362394 | Hddc2         | NM_027168    | 4.53546e-005 | 1.63656 | E11.5 * Sox10 up vs E11.5 * Ctrl |
| 10569370 | Th            | NM_009377    | 3.07844e-006 | 1.63601 | E11.5 * Sox10 up vs E11.5 * Ctrl |
| 10544186 | Mkrn1         | NM_018810    | 9.64184e-008 | 1.63592 | E11.5 * Sox10 up vs E11.5 * Ctrl |
| 10369835 | Phyhipl       | NM_178621    | 2.34406e-005 | 1.63534 | E11.5 * Sox10 up vs E11.5 * Ctrl |
| 10358627 | Hmcn1         | NM_001024720 | 4.87656e-005 | 1.63382 | E11.5 * Sox10 up vs E11.5 * Ctrl |
| 10446777 | Ehd3          | NM_020578    | 3.28272e-005 | 1.63213 | E11.5 * Sox10 up vs E11.5 * Ctrl |
| 10605797 | Arhgef9       | NM_001033329 | 1.03105e-007 | 1.63198 | E11.5 * Sox10 up vs E11.5 * Ctrl |
| 10488709 | 8430427H17Rik | NM_001134300 | 3.94408e-006 | 1.63173 | E11.5 * Sox10 up vs E11.5 * Ctrl |
| 10519770 | Pclo          | NM_011995    | 3.17027e-005 | 1.63018 | E11.5 * Sox10 up vs E11.5 * Ctrl |
| 10405343 | Tspan17       | NM_028841    | 8.90931e-006 | 1.6299  | E11.5 * Sox10 up vs E11.5 * Ctrl |
| 10395457 | Etv1          | NM_007960    | 1.67853e-005 | 1.62954 | E11.5 * Sox10 up vs E11.5 * Ctrl |
| 10459552 | Spire1        | NM_194355    | 2.63159e-008 | 1.62953 | E11.5 * Sox10 up vs E11.5 * Ctrl |
| 10476301 | Smox          | NM_145533    | 0.00011655   | 1.62731 | E11.5 * Sox10 up vs E11.5 * Ctrl |
| 10358754 | EG639787      | XR_002131    | 2.92571e-005 | 1.62721 | E11.5 * Sox10 up vs E11.5 * Ctrl |
| 10462035 | Ldhd          | NM_008492    | 9.74567e-008 | 1.62701 | E11.5 * Sox10 up vs E11.5 * Ctrl |
| 10571567 | Sorbs2        | NM_172752    | 1.02981e-007 | 1.62651 | E11.5 * Sox10 up vs E11.5 * Ctrl |
| 10429295 | Kcnk9         | NM_001033876 | 5.52423e-006 | 1.62639 | E11.5 * Sox10 up vs E11.5 * Ctrl |
| 10503643 | Ndufaf4       | NM_026742    | 6.98865e-008 | 1.62588 | E11.5 * Sox10 up vs E11.5 * Ctrl |
| 10533858 | Eif2b1        | NM_145371    | 1.01153e-008 | 1.62583 | E11.5 * Sox10 up vs E11.5 * Ctrl |

|          |               |               |              |         |                                  |
|----------|---------------|---------------|--------------|---------|----------------------------------|
| 10466938 | 5033414D02Rik | NM_026362     | 0.000591275  | 1.62541 | E11.5 * Sox10 up vs E11.5 * Ctrl |
| 10468668 | Afap1l2       | NM_146102     | 0.000501973  | 1.62457 | E11.5 * Sox10 up vs E11.5 * Ctrl |
| 10561369 | BC089491      | NM_175033     | 8.46827e-006 | 1.62441 | E11.5 * Sox10 up vs E11.5 * Ctrl |
| 10568109 | Asphd1        | NM_001039645  | 4.11441e-005 | 1.62436 | E11.5 * Sox10 up vs E11.5 * Ctrl |
| 10379795 | Ap1gbp1       | NM_001115009  | 6.95315e-007 | 1.62407 | E11.5 * Sox10 up vs E11.5 * Ctrl |
| 10358650 | Hmcn1         | NM_001024720  | 2.14772e-005 | 1.62302 | E11.5 * Sox10 up vs E11.5 * Ctrl |
| 10504692 | Tmod1         | NM_021883     | 4.29705e-005 | 1.62291 | E11.5 * Sox10 up vs E11.5 * Ctrl |
| 10423471 | Ctnnd2        | NM_008729     | 6.83188e-006 | 1.62289 | E11.5 * Sox10 up vs E11.5 * Ctrl |
| 10398996 | Crip2         | NM_024223     | 0.000390565  | 1.62066 | E11.5 * Sox10 up vs E11.5 * Ctrl |
| 10378549 | Rtn4rl1       | NM_177708     | 1.03654e-005 | 1.62011 | E11.5 * Sox10 up vs E11.5 * Ctrl |
| 10560919 | Atp1a3        | NM_144921     | 0.00129207   | 1.62    | E11.5 * Sox10 up vs E11.5 * Ctrl |
| 10421648 | Slc25a30      | NM_026232     | 7.09622e-007 | 1.6195  | E11.5 * Sox10 up vs E11.5 * Ctrl |
| 10358537 | Hmcn1         | NM_001024720  | 1.52073e-006 | 1.6193  | E11.5 * Sox10 up vs E11.5 * Ctrl |
| 10394627 | Nbas          | BC057020      | 7.767e-009   | 1.6189  | E11.5 * Sox10 up vs E11.5 * Ctrl |
| 10395394 | 4930579E17Rik | NM_178629     | 0.000122641  | 1.61798 | E11.5 * Sox10 up vs E11.5 * Ctrl |
| 10538519 | Gsbs          | NM_011153     | 0.000152525  | 1.61795 | E11.5 * Sox10 up vs E11.5 * Ctrl |
| 10605465 | Prkx          | NM_016979     | 0.000238818  | 1.61734 | E11.5 * Sox10 up vs E11.5 * Ctrl |
| 10506150 | Foxd3         | NM_010425     | 0.00104044   | 1.6171  | E11.5 * Sox10 up vs E11.5 * Ctrl |
| 10366951 | Ndufa4l2      | NM_001098789  | 0.000791832  | 1.61592 | E11.5 * Sox10 up vs E11.5 * Ctrl |
| 10479230 | Phactr3       | NM_028806     | 9.38676e-005 | 1.61576 | E11.5 * Sox10 up vs E11.5 * Ctrl |
| 10404702 | Gcnt2         | NM_023887     | 1.80852e-006 | 1.61476 | E11.5 * Sox10 up vs E11.5 * Ctrl |
| 10367641 | Mthfd1l       | NM_172308     | 6.65558e-009 | 1.61424 | E11.5 * Sox10 up vs E11.5 * Ctrl |
| 10457942 | Syt4          | NM_009308     | 0.000143656  | 1.61393 | E11.5 * Sox10 up vs E11.5 * Ctrl |
| 10406934 | Etv1          | NM_007960     | 2.32319e-006 | 1.61361 | E11.5 * Sox10 up vs E11.5 * Ctrl |
| 10345172 | ENSMUSG00000C | ENSMUST00000C | 0.00133473   | 1.61139 | E11.5 * Sox10 up vs E11.5 * Ctrl |
| 10597323 | Arpp21        | NM_033264     | 1.54558e-007 | 1.61022 | E11.5 * Sox10 up vs E11.5 * Ctrl |
| 10392449 | Wipi1         | NM_145940     | 2.76617e-005 | 1.60739 | E11.5 * Sox10 up vs E11.5 * Ctrl |
| 10439955 | Fam55c        | NM_001134457  | 7.86541e-005 | 1.60722 | E11.5 * Sox10 up vs E11.5 * Ctrl |
| 10358569 | Hmcn1         | NM_001024720  | 7.8178e-005  | 1.60673 | E11.5 * Sox10 up vs E11.5 * Ctrl |
| 10451054 | Enpp4         | NM_199016     | 3.67159e-005 | 1.60523 | E11.5 * Sox10 up vs E11.5 * Ctrl |
| 10358583 | Hmcn1         | NM_001024720  | 5.7558e-005  | 1.60418 | E11.5 * Sox10 up vs E11.5 * Ctrl |
| 10477994 | Ctnnbl1       | NM_025680     | 4.08303e-007 | 1.6035  | E11.5 * Sox10 up vs E11.5 * Ctrl |
| 10460057 | Tshz1         | NM_001081300  | 5.80111e-006 | 1.60304 | E11.5 * Sox10 up vs E11.5 * Ctrl |
| 10468217 | Actr1a        | NM_016860     | 1.76622e-005 | 1.60255 | E11.5 * Sox10 up vs E11.5 * Ctrl |
| 10568735 | Ebf3          | NM_001113415  | 3.44545e-006 | 1.60083 | E11.5 * Sox10 up vs E11.5 * Ctrl |
| 10468200 | Cuedc2        | NM_024192     | 2.55543e-007 | 1.60042 | E11.5 * Sox10 up vs E11.5 * Ctrl |
| 10495625 | Dpyd          | NM_170778     | 7.212e-005   | 1.59892 | E11.5 * Sox10 up vs E11.5 * Ctrl |
| 10402283 | Itpk1         | NM_172584     | 0.0033891    | 1.59824 | E11.5 * Sox10 up vs E11.5 * Ctrl |
| 10512065 | OTTMUSG00000C | XR_033416     | 0.000249272  | 1.59738 | E11.5 * Sox10 up vs E11.5 * Ctrl |
| 10354714 | Rftn2         | NM_028713     | 2.72577e-007 | 1.59676 | E11.5 * Sox10 up vs E11.5 * Ctrl |
| 10373964 | Thoc5         | NM_172438     | 6.18786e-006 | 1.59663 | E11.5 * Sox10 up vs E11.5 * Ctrl |
| 10391513 | Dusp3         | NM_028207     | 0.000607446  | 1.59639 | E11.5 * Sox10 up vs E11.5 * Ctrl |
| 10559146 | Brsk2         | NM_029426     | 9.05657e-006 | 1.59619 | E11.5 * Sox10 up vs E11.5 * Ctrl |
| 10358654 | Hmcn1         | NM_001024720  | 1.14162e-005 | 1.59505 | E11.5 * Sox10 up vs E11.5 * Ctrl |
| 10441361 | Tiam2         | NM_001122998  | 9.49894e-006 | 1.5945  | E11.5 * Sox10 up vs E11.5 * Ctrl |
| 10590860 | 9030420J04Rik | BC137891      | 2.28763e-005 | 1.59444 | E11.5 * Sox10 up vs E11.5 * Ctrl |
| 10470696 | Med27         | NM_026896     | 0.000208927  | 1.59432 | E11.5 * Sox10 up vs E11.5 * Ctrl |
| 10490794 | Pkia          | NM_008862     | 7.60767e-005 | 1.5943  | E11.5 * Sox10 up vs E11.5 * Ctrl |
| 10358553 | Hmcn1         | NM_001024720  | 0.00381187   | 1.59418 | E11.5 * Sox10 up vs E11.5 * Ctrl |
| 10358567 | Hmcn1         | NM_001024720  | 3.83825e-005 | 1.59393 | E11.5 * Sox10 up vs E11.5 * Ctrl |
| 10375322 | 4933415A04Rik | ENSMUST00000C | 9.65475e-006 | 1.59318 | E11.5 * Sox10 up vs E11.5 * Ctrl |
| 10390635 | 1810046J19Rik | NM_025559     | 1.55642e-005 | 1.59303 | E11.5 * Sox10 up vs E11.5 * Ctrl |
| 10361642 | Lrp11         | NM_172784     | 0.000485563  | 1.59249 | E11.5 * Sox10 up vs E11.5 * Ctrl |
| 10435789 | Zbtb20        | ENSMUST00000C | 0.000109983  | 1.5909  | E11.5 * Sox10 up vs E11.5 * Ctrl |
| 10528648 | Abcf2         | NM_013853     | 7.10063e-007 | 1.59069 | E11.5 * Sox10 up vs E11.5 * Ctrl |
| 10381082 | Rara          | NM_009024     | 0.000130228  | 1.58972 | E11.5 * Sox10 up vs E11.5 * Ctrl |
| 10564220 | Gkap1         | NM_019832     | 6.50342e-005 | 1.58925 | E11.5 * Sox10 up vs E11.5 * Ctrl |
| 10472162 | Gpd2          | NM_010274     | 6.29496e-006 | 1.58923 | E11.5 * Sox10 up vs E11.5 * Ctrl |
| 10593927 | Scamp5        | NM_020270     | 7.22893e-005 | 1.58906 | E11.5 * Sox10 up vs E11.5 * Ctrl |
| 10386844 | Zswim7        | BC109343      | 0.000459268  | 1.58861 | E11.5 * Sox10 up vs E11.5 * Ctrl |
| 10538753 | Atoh1         | BC010820      | 0.000323418  | 1.58822 | E11.5 * Sox10 up vs E11.5 * Ctrl |
| 10487748 | 4930402H24Rik | BC052447      | 1.41838e-007 | 1.58809 | E11.5 * Sox10 up vs E11.5 * Ctrl |
| 10494060 | Mrpl9         | NM_030116     | 6.39932e-007 | 1.58742 | E11.5 * Sox10 up vs E11.5 * Ctrl |
| 10567022 | Btbd10        | NM_133700     | 5.34608e-005 | 1.58675 | E11.5 * Sox10 up vs E11.5 * Ctrl |
| 10417713 | Rarb          | NM_011243     | 4.83196e-006 | 1.58674 | E11.5 * Sox10 up vs E11.5 * Ctrl |
| 10388884 | Nlk           | NM_008702     | 8.75336e-008 | 1.5861  | E11.5 * Sox10 up vs E11.5 * Ctrl |

|                        |               |              |         |                                  |
|------------------------|---------------|--------------|---------|----------------------------------|
| 10575497 Mtss1l        | NM_198625     | 0.000201358  | 1.58535 | E11.5 * Sox10 up vs E11.5 * Ctrl |
| 10349637 2700049P18Rik | NM_175382     | 9.60112e-005 | 1.58529 | E11.5 * Sox10 up vs E11.5 * Ctrl |
| 10370766 Gamt          | NM_010255     | 0.000123259  | 1.58509 | E11.5 * Sox10 up vs E11.5 * Ctrl |
| 10600836 Msn           | NM_010833     | 1.54734e-008 | 1.58505 | E11.5 * Sox10 up vs E11.5 * Ctrl |
| 10589913 Dync1li1      | NM_146229     | 1.85221e-006 | 1.58469 | E11.5 * Sox10 up vs E11.5 * Ctrl |
| 10530100 Arap2         | NM_178407     | 0.000109334  | 1.58404 | E11.5 * Sox10 up vs E11.5 * Ctrl |
| 10400141 Zbed4         | NM_181412     | 0.000252779  | 1.58378 | E11.5 * Sox10 up vs E11.5 * Ctrl |
| 10508907 Lin28         | NM_145833     | 0.00181927   | 1.5833  | E11.5 * Sox10 up vs E11.5 * Ctrl |
| 10411306 Polk          | NM_012048     | 2.53518e-008 | 1.58271 | E11.5 * Sox10 up vs E11.5 * Ctrl |
| 10501358 Sars          | NM_011319     | 1.24717e-007 | 1.5823  | E11.5 * Sox10 up vs E11.5 * Ctrl |
| 10459827 Rnf165        | ENSMUST000001 | 3.85549e-007 | 1.58201 | E11.5 * Sox10 up vs E11.5 * Ctrl |
| 10455238 Ndfip1        | NM_022996     | 1.15247e-008 | 1.58188 | E11.5 * Sox10 up vs E11.5 * Ctrl |
| 10364502 Palm          | NM_023128     | 8.51374e-005 | 1.58177 | E11.5 * Sox10 up vs E11.5 * Ctrl |
| 10564203               | ---           | 0.00833481   | 1.58118 | E11.5 * Sox10 up vs E11.5 * Ctrl |
| 10587085 BC031353      | NM_001113283  | 1.77086e-006 | 1.58003 | E11.5 * Sox10 up vs E11.5 * Ctrl |
| 10416044 Ccdc25        | NM_145944     | 0.000547619  | 1.57919 | E11.5 * Sox10 up vs E11.5 * Ctrl |
| 10385375 Thg1l         | NM_001080969  | 0.000127291  | 1.57825 | E11.5 * Sox10 up vs E11.5 * Ctrl |
| 10424404 Pvt1          | NR_003368     | 0.000785782  | 1.57738 | E11.5 * Sox10 up vs E11.5 * Ctrl |
| 10461022 Ppp1r14b      | NM_008889     | 1.36935e-009 | 1.57711 | E11.5 * Sox10 up vs E11.5 * Ctrl |
| 10358631 Hmcn1         | NM_001024720  | 0.00123511   | 1.57578 | E11.5 * Sox10 up vs E11.5 * Ctrl |
| 10545379 Usp39         | NM_138592     | 1.20305e-007 | 1.57531 | E11.5 * Sox10 up vs E11.5 * Ctrl |
| 10459329 2700046A07Rik | ENSMUST000001 | 0.000273846  | 1.5752  | E11.5 * Sox10 up vs E11.5 * Ctrl |
| 10460645 Map3k11       | NM_022012     | 0.00305476   | 1.57386 | E11.5 * Sox10 up vs E11.5 * Ctrl |
| 10431051 Scube1        | NM_022723     | 2.47814e-005 | 1.57338 | E11.5 * Sox10 up vs E11.5 * Ctrl |
| 10357345 E030049G20Rik | NM_172484     | 0.00033135   | 1.57315 | E11.5 * Sox10 up vs E11.5 * Ctrl |
| 10396740 Gphn          | NM_172952     | 5.82558e-006 | 1.57265 | E11.5 * Sox10 up vs E11.5 * Ctrl |
| 10521709 Lap3          | NM_024434     | 1.04144e-006 | 1.5725  | E11.5 * Sox10 up vs E11.5 * Ctrl |
| 10420787 Mtmr9         | NM_177594     | 6.60877e-006 | 1.57219 | E11.5 * Sox10 up vs E11.5 * Ctrl |
| 10573172 Clgn          | NM_009904     | 5.42571e-005 | 1.57146 | E11.5 * Sox10 up vs E11.5 * Ctrl |
| 10454077 Taf4b         | NM_001100449  | 4.27402e-006 | 1.57095 | E11.5 * Sox10 up vs E11.5 * Ctrl |
| 10569129 Sct           | NM_011328     | 7.88735e-005 | 1.57079 | E11.5 * Sox10 up vs E11.5 * Ctrl |
| 10524955 Tesc          | NM_021344     | 6.22818e-005 | 1.56921 | E11.5 * Sox10 up vs E11.5 * Ctrl |
| 10550400 Pnmal2        | NM_001099636  | 3.42529e-005 | 1.5685  | E11.5 * Sox10 up vs E11.5 * Ctrl |
| 10581289 Atp6v0d1      | NM_013477     | 9.09992e-005 | 1.56761 | E11.5 * Sox10 up vs E11.5 * Ctrl |
| 10354229 2610017I09Rik | BC058417      | 0.000782803  | 1.56737 | E11.5 * Sox10 up vs E11.5 * Ctrl |
| 10420385 N6amt2        | NM_026526     | 9.0073e-006  | 1.56675 | E11.5 * Sox10 up vs E11.5 * Ctrl |
| 10511725 Cyb5r4        | NM_024195     | 2.31554e-006 | 1.56584 | E11.5 * Sox10 up vs E11.5 * Ctrl |
| 10540248 Mitf          | NM_001113198  | 0.000286803  | 1.56571 | E11.5 * Sox10 up vs E11.5 * Ctrl |
| 10420846 Fzd3          | NM_021458     | 5.03029e-007 | 1.56489 | E11.5 * Sox10 up vs E11.5 * Ctrl |
| 10590663 Gria4         | NM_019691     | 4.50304e-006 | 1.56462 | E11.5 * Sox10 up vs E11.5 * Ctrl |
| 10381574 Rundc3a       | NM_016759     | 1.7812e-005  | 1.56442 | E11.5 * Sox10 up vs E11.5 * Ctrl |
| 10497996 Ikzf5         | NM_175115     | 6.04221e-006 | 1.56437 | E11.5 * Sox10 up vs E11.5 * Ctrl |
| 10561376 Dll3          | NM_007866     | 1.45138e-005 | 1.56397 | E11.5 * Sox10 up vs E11.5 * Ctrl |
| 10389719 Scpep1        | NM_029023     | 4.43166e-007 | 1.56328 | E11.5 * Sox10 up vs E11.5 * Ctrl |
| 10478897 Ptpn1         | NM_011201     | 3.30499e-007 | 1.56259 | E11.5 * Sox10 up vs E11.5 * Ctrl |
| 10538338 Creb5         | NM_172728     | 1.71798e-007 | 1.56254 | E11.5 * Sox10 up vs E11.5 * Ctrl |
| 10345715 Map4k4        | NM_008696     | 3.35479e-007 | 1.56254 | E11.5 * Sox10 up vs E11.5 * Ctrl |
| 10358656 Hmcn1         | NM_001024720  | 3.91573e-006 | 1.56233 | E11.5 * Sox10 up vs E11.5 * Ctrl |
| 10375175 Slit3         | NM_011412     | 2.88613e-006 | 1.56226 | E11.5 * Sox10 up vs E11.5 * Ctrl |
| 10552276 Ube2h         | NM_009459     | 0.000109312  | 1.56206 | E11.5 * Sox10 up vs E11.5 * Ctrl |
| 10456522 Tcf4          | NM_013685     | 5.68772e-009 | 1.56132 | E11.5 * Sox10 up vs E11.5 * Ctrl |
| 10594001 Arid3b        | NM_019689     | 1.15923e-006 | 1.56111 | E11.5 * Sox10 up vs E11.5 * Ctrl |
| 10425158 Pdxp          | NM_020271     | 0.00012185   | 1.56086 | E11.5 * Sox10 up vs E11.5 * Ctrl |
| 10546476 Magi1         | NM_001029850  | 4.864e-007   | 1.56076 | E11.5 * Sox10 up vs E11.5 * Ctrl |
| 10416541 Enox1         | NM_172813     | 2.96843e-007 | 1.55888 | E11.5 * Sox10 up vs E11.5 * Ctrl |
| 10587107 Myo5a         | NM_010864     | 5.14531e-009 | 1.55875 | E11.5 * Sox10 up vs E11.5 * Ctrl |
| 10483626 Dlx2          | NM_010054     | 1.07192e-005 | 1.55844 | E11.5 * Sox10 up vs E11.5 * Ctrl |
| 10358523 Hmcn1         | NM_001024720  | 5.87803e-005 | 1.55785 | E11.5 * Sox10 up vs E11.5 * Ctrl |
| 10575249 Txnl4b        | NM_175646     | 7.18094e-006 | 1.5575  | E11.5 * Sox10 up vs E11.5 * Ctrl |
| 10358585 Hmcn1         | NM_001024720  | 0.00010673   | 1.5571  | E11.5 * Sox10 up vs E11.5 * Ctrl |
| 10585601 Snupn         | NM_178374     | 1.48429e-005 | 1.55604 | E11.5 * Sox10 up vs E11.5 * Ctrl |
| 10590909 Endod1        | NM_028013     | 3.71912e-006 | 1.55581 | E11.5 * Sox10 up vs E11.5 * Ctrl |
| 10520650 Cad           | NM_023525     | 3.55325e-005 | 1.5556  | E11.5 * Sox10 up vs E11.5 * Ctrl |
| 10578027 Mak16         | NM_026453     | 7.76114e-005 | 1.55523 | E11.5 * Sox10 up vs E11.5 * Ctrl |
| 10348432 Agap1         | NM_178119     | 8.54935e-005 | 1.55502 | E11.5 * Sox10 up vs E11.5 * Ctrl |
| 10548043 Kcna5         | NM_145983     | 0.00314925   | 1.55399 | E11.5 * Sox10 up vs E11.5 * Ctrl |

|          |              |              |              |         |                                  |
|----------|--------------|--------------|--------------|---------|----------------------------------|
| 10434934 | Bdh1         | NM_175177    | 7.67206e-005 | 1.55374 | E11.5 * Sox10 up vs E11.5 * Ctrl |
| 10394770 | Odc1         | NM_013614    | 9.76711e-008 | 1.55361 | E11.5 * Sox10 up vs E11.5 * Ctrl |
| 10358573 | Hmcn1        | NM_001024720 | 0.000172662  | 1.55254 | E11.5 * Sox10 up vs E11.5 * Ctrl |
| 10528484 | SrpK2        | NM_009274    | 3.48635e-007 | 1.5525  | E11.5 * Sox10 up vs E11.5 * Ctrl |
| 10526977 | Eif3b        | NM_133916    | 3.24927e-005 | 1.55197 | E11.5 * Sox10 up vs E11.5 * Ctrl |
| 10600390 | Gdi1         | NM_010273    | 3.57664e-006 | 1.55159 | E11.5 * Sox10 up vs E11.5 * Ctrl |
| 10565852 | Rnf169       | AK173319     | 1.58424e-006 | 1.55156 | E11.5 * Sox10 up vs E11.5 * Ctrl |
| 10446763 | Lbh          | NM_029999    | 6.27818e-008 | 1.55115 | E11.5 * Sox10 up vs E11.5 * Ctrl |
| 10604057 | 06-Sep       | NM_019942    | 3.78572e-005 | 1.55108 | E11.5 * Sox10 up vs E11.5 * Ctrl |
| 10457118 | RttN         | NM_175542    | 3.50497e-005 | 1.55098 | E11.5 * Sox10 up vs E11.5 * Ctrl |
| 10542896 | Bicd1        | NM_009753    | 3.52648e-005 | 1.55067 | E11.5 * Sox10 up vs E11.5 * Ctrl |
| 10456346 | Sec11c       | NM_025468    | 1.77681e-005 | 1.55065 | E11.5 * Sox10 up vs E11.5 * Ctrl |
| 10370072 | Prmt2        | NM_133182    | 0.000228606  | 1.55064 | E11.5 * Sox10 up vs E11.5 * Ctrl |
| 10600210 | Slc6a8       | NM_133987    | 3.63869e-005 | 1.55033 | E11.5 * Sox10 up vs E11.5 * Ctrl |
| 10531866 | Mapk10       | NM_009158    | 4.19526e-005 | 1.54927 | E11.5 * Sox10 up vs E11.5 * Ctrl |
| 10478364 | Tox2         | NM_001098799 | 1.02444e-005 | 1.54917 | E11.5 * Sox10 up vs E11.5 * Ctrl |
| 10517373 | Rcan3        | NM_022980    | 1.2338e-008  | 1.5479  | E11.5 * Sox10 up vs E11.5 * Ctrl |
| 10464504 | Lrp5         | NM_008513    | 0.00192102   | 1.5478  | E11.5 * Sox10 up vs E11.5 * Ctrl |
| 10451580 | Bysl         | NM_016859    | 7.97026e-006 | 1.54748 | E11.5 * Sox10 up vs E11.5 * Ctrl |
| 10350113 | Arl8a        | NM_026823    | 7.66408e-005 | 1.54733 | E11.5 * Sox10 up vs E11.5 * Ctrl |
| 10429160 | St3gal1      | NM_009177    | 8.40934e-005 | 1.54702 | E11.5 * Sox10 up vs E11.5 * Ctrl |
| 10575376 | Ftsjd1       | NM_146215    | 1.99372e-006 | 1.54666 | E11.5 * Sox10 up vs E11.5 * Ctrl |
| 10424781 | Grina        | NM_023168    | 3.38213e-005 | 1.54627 | E11.5 * Sox10 up vs E11.5 * Ctrl |
| 10607004 | Psmd10       | NM_016883    | 1.90269e-005 | 1.54624 | E11.5 * Sox10 up vs E11.5 * Ctrl |
| 10518428 | Cln6         | NM_011929    | 0.000537091  | 1.54498 | E11.5 * Sox10 up vs E11.5 * Ctrl |
| 10558971 | Ap2a2        | NM_007459    | 5.06592e-006 | 1.54491 | E11.5 * Sox10 up vs E11.5 * Ctrl |
| 10565018 | Iqgap1       | NM_016721    | 5.07314e-007 | 1.54467 | E11.5 * Sox10 up vs E11.5 * Ctrl |
| 10352119 | Pppde1       | NM_024282    | 7.17039e-007 | 1.54442 | E11.5 * Sox10 up vs E11.5 * Ctrl |
| 10525439 | P2rx4        | NM_011026    | 0.000782952  | 1.54417 | E11.5 * Sox10 up vs E11.5 * Ctrl |
| 10490972 | Trim55       | NM_001081281 | 0.00435209   | 1.54368 | E11.5 * Sox10 up vs E11.5 * Ctrl |
| 10558481 | Dpysl4       | NM_011993    | 6.75547e-005 | 1.54349 | E11.5 * Sox10 up vs E11.5 * Ctrl |
| 10513869 | Megf9        | NM_172694    | 1.94246e-008 | 1.54315 | E11.5 * Sox10 up vs E11.5 * Ctrl |
| 10507273 | Pik3r3       | NM_181585    | 1.07665e-008 | 1.54311 | E11.5 * Sox10 up vs E11.5 * Ctrl |
| 10566516 | Rrp8         | NM_025897    | 3.67748e-005 | 1.54059 | E11.5 * Sox10 up vs E11.5 * Ctrl |
| 10372891 | Srgap1       | NM_001081037 | 3.17299e-006 | 1.5403  | E11.5 * Sox10 up vs E11.5 * Ctrl |
| 10458767 | Trim36       | NM_178872    | 0.000104976  | 1.53931 | E11.5 * Sox10 up vs E11.5 * Ctrl |
| 10524588 | Ankrd13a     | NM_026718    | 2.46984e-005 | 1.53858 | E11.5 * Sox10 up vs E11.5 * Ctrl |
| 10524909 | Nos1         | NM_008712    | 1.67741e-005 | 1.5385  | E11.5 * Sox10 up vs E11.5 * Ctrl |
| 10408450 | Sox4         | NM_009238    | 0.000329046  | 1.53776 | E11.5 * Sox10 up vs E11.5 * Ctrl |
| 10466712 | Mamdc2       | NM_174857    | 2.54068e-005 | 1.53715 | E11.5 * Sox10 up vs E11.5 * Ctrl |
| 10604633 | Cxx1b        | NM_001018063 | 4.01447e-008 | 1.53708 | E11.5 * Sox10 up vs E11.5 * Ctrl |
| 10392369 | Cacng4       | NM_019431    | 1.43558e-005 | 1.53614 | E11.5 * Sox10 up vs E11.5 * Ctrl |
| 10564417 | Aldh1a3      | NM_053080    | 0.000213404  | 1.53601 | E11.5 * Sox10 up vs E11.5 * Ctrl |
| 10355996 | Slc25a5      | NM_007451    | 5.7316e-007  | 1.53561 | E11.5 * Sox10 up vs E11.5 * Ctrl |
| 10351825 | Tagln2       | NM_178598    | 5.72149e-005 | 1.53557 | E11.5 * Sox10 up vs E11.5 * Ctrl |
| 10528227 | Gnai1        | NM_010305    | 8.00236e-006 | 1.53546 | E11.5 * Sox10 up vs E11.5 * Ctrl |
| 10523595 | Ptpn13       | NM_011204    | 3.72036e-008 | 1.53531 | E11.5 * Sox10 up vs E11.5 * Ctrl |
| 10594631 | Aph1b        | NM_177583    | 4.25264e-006 | 1.53463 | E11.5 * Sox10 up vs E11.5 * Ctrl |
| 10596583 | Dock3        | NM_153413    | 1.97606e-005 | 1.53375 | E11.5 * Sox10 up vs E11.5 * Ctrl |
| 10499643 | ChrnB2       | NM_009602    | 6.15115e-005 | 1.53368 | E11.5 * Sox10 up vs E11.5 * Ctrl |
| 10563390 | Cyth2        | NM_011181    | 0.000256508  | 1.5331  | E11.5 * Sox10 up vs E11.5 * Ctrl |
| 10554960 | Fam181b      | NM_021427    | 7.96079e-005 | 1.53287 | E11.5 * Sox10 up vs E11.5 * Ctrl |
| 10358539 | Hmcn1        | NM_001024720 | 0.00217078   | 1.5327  | E11.5 * Sox10 up vs E11.5 * Ctrl |
| 10545217 | LOC100046973 | ENSMUST00000 | 0.00365056   | 1.53252 | E11.5 * Sox10 up vs E11.5 * Ctrl |
| 10480492 | Cacna1b      | NM_001042528 | 2.18941e-007 | 1.53246 | E11.5 * Sox10 up vs E11.5 * Ctrl |
| 10472289 | Tank         | NM_011529    | 5.33413e-005 | 1.53213 | E11.5 * Sox10 up vs E11.5 * Ctrl |
| 10409345 | Cltb         | NM_028870    | 0.000140603  | 1.53152 | E11.5 * Sox10 up vs E11.5 * Ctrl |
| 10504008 | Chmp5        | NM_029814    | 6.88368e-007 | 1.53004 | E11.5 * Sox10 up vs E11.5 * Ctrl |
| 10536483 | Tes          | NM_207176    | 4.36872e-011 | 1.52964 | E11.5 * Sox10 up vs E11.5 * Ctrl |
| 10550915 | Cadm4        | NM_153112    | 0.000915112  | 1.52936 | E11.5 * Sox10 up vs E11.5 * Ctrl |
| 10570000 | Gpi1         | NM_008155    | 0.000667018  | 1.52922 | E11.5 * Sox10 up vs E11.5 * Ctrl |
| 10358623 | Hmcn1        | NM_001024720 | 0.000157077  | 1.5288  | E11.5 * Sox10 up vs E11.5 * Ctrl |
| 10581547 | Nob1         | NM_026277    | 1.8626e-005  | 1.52864 | E11.5 * Sox10 up vs E11.5 * Ctrl |
| 10495659 | Cnn3         | NM_028044    | 1.73016e-008 | 1.52746 | E11.5 * Sox10 up vs E11.5 * Ctrl |
| 10456501 | Rnmt         | NM_026440    | 4.96904e-006 | 1.52715 | E11.5 * Sox10 up vs E11.5 * Ctrl |
| 10358611 | Hmcn1        | NM_001024720 | 0.000133306  | 1.52646 | E11.5 * Sox10 up vs E11.5 * Ctrl |

|                        |              |              |         |                                  |
|------------------------|--------------|--------------|---------|----------------------------------|
| 10400023 Tspan13       | NM_025359    | 4.09468e-006 | 1.52625 | E11.5 * Sox10 up vs E11.5 * Ctrl |
| 10358664 Hmcn1         | NM_001024720 | 1.08619e-005 | 1.5259  | E11.5 * Sox10 up vs E11.5 * Ctrl |
| 10491962 Foxo1         | NM_019739    | 1.42772e-006 | 1.52586 | E11.5 * Sox10 up vs E11.5 * Ctrl |
| 10579872 Tpd52         | NM_001025263 | 0.000122074  | 1.52583 | E11.5 * Sox10 up vs E11.5 * Ctrl |
| 10394286 2410017P09Rik | BC067010     | 0.000900058  | 1.52568 | E11.5 * Sox10 up vs E11.5 * Ctrl |
| 10434758 St6gal1       | NM_145933    | 8.02161e-007 | 1.52448 | E11.5 * Sox10 up vs E11.5 * Ctrl |
| 10360479 Cep170        | NM_001099637 | 4.50176e-007 | 1.52309 | E11.5 * Sox10 up vs E11.5 * Ctrl |
| 10358660 Hmcn1         | NM_001024720 | 0.000918321  | 1.52246 | E11.5 * Sox10 up vs E11.5 * Ctrl |
| 10555118 Pak1          | NM_011035    | 2.22316e-006 | 1.5224  | E11.5 * Sox10 up vs E11.5 * Ctrl |
| 10570437 Fbxo25        | NM_025785    | 1.98862e-005 | 1.52198 | E11.5 * Sox10 up vs E11.5 * Ctrl |
| 10419578 Ndrp2         | NM_013864    | 5.26437e-005 | 1.5219  | E11.5 * Sox10 up vs E11.5 * Ctrl |
| 10384795 Cyb5d1        | NM_001045525 | 0.00564332   | 1.5208  | E11.5 * Sox10 up vs E11.5 * Ctrl |
| 10467425 Sorbs1        | NM_178362    | 1.63805e-006 | 1.52048 | E11.5 * Sox10 up vs E11.5 * Ctrl |
| 10470834 Spna2         | NM_001076554 | 2.30561e-006 | 1.52044 | E11.5 * Sox10 up vs E11.5 * Ctrl |
| 10506274 Dnajc6        | NM_198412    | 2.42835e-006 | 1.51994 | E11.5 * Sox10 up vs E11.5 * Ctrl |
| 10511881 Manea         | NM_172865    | 1.62361e-005 | 1.51991 | E11.5 * Sox10 up vs E11.5 * Ctrl |
| 10452613 Arhgap28      | NM_172964    | 4.13217e-007 | 1.51879 | E11.5 * Sox10 up vs E11.5 * Ctrl |
| 10436487 Vgll3         | AK007165     | 0.000866473  | 1.51837 | E11.5 * Sox10 up vs E11.5 * Ctrl |
| 10491083 Aadacl1       | NM_178772    | 9.87442e-005 | 1.51822 | E11.5 * Sox10 up vs E11.5 * Ctrl |
| 10357133               | ---          | 1.90841e-008 | 1.51768 | E11.5 * Sox10 up vs E11.5 * Ctrl |
| 10486396 Ehd4          | NM_133838    | 0.00477573   | 1.51743 | E11.5 * Sox10 up vs E11.5 * Ctrl |
| 10573115 Rnf150        | NM_177378    | 1.34712e-005 | 1.51696 | E11.5 * Sox10 up vs E11.5 * Ctrl |
| 10384985 Rhbdf1        | NM_010117    | 6.64225e-005 | 1.51668 | E11.5 * Sox10 up vs E11.5 * Ctrl |
| 10519951 Pion          | NM_175437    | 0.000299135  | 1.51625 | E11.5 * Sox10 up vs E11.5 * Ctrl |
| 10441497 Tulp4         | NM_054040    | 0.000921578  | 1.51607 | E11.5 * Sox10 up vs E11.5 * Ctrl |
| 10362941 Prep          | NM_011156    | 4.44375e-006 | 1.51598 | E11.5 * Sox10 up vs E11.5 * Ctrl |
| 10561343 Josd1         | NM_028792    | 0.000816768  | 1.51549 | E11.5 * Sox10 up vs E11.5 * Ctrl |
| 10426798 Smarcd1       | NM_031842    | 7.0103e-005  | 1.51512 | E11.5 * Sox10 up vs E11.5 * Ctrl |
| 10570180 EG434280      | ENSMUST00000 | 2.67327e-005 | 1.51482 | E11.5 * Sox10 up vs E11.5 * Ctrl |
| 10490551 Nkain4        | NM_021426    | 3.37228e-005 | 1.51366 | E11.5 * Sox10 up vs E11.5 * Ctrl |
| 10394749 Nol10         | NM_001008421 | 1.16108e-005 | 1.51348 | E11.5 * Sox10 up vs E11.5 * Ctrl |
| 10430020 Vps28         | NM_025842    | 0.00012085   | 1.5134  | E11.5 * Sox10 up vs E11.5 * Ctrl |
| 10402585 Wars          | NM_011710    | 5.82571e-006 | 1.51293 | E11.5 * Sox10 up vs E11.5 * Ctrl |
| 10554094 Igf1r         | NM_010513    | 0.000108914  | 1.51287 | E11.5 * Sox10 up vs E11.5 * Ctrl |
| 10566457 Apbb1         | NM_009685    | 5.20115e-005 | 1.51204 | E11.5 * Sox10 up vs E11.5 * Ctrl |
| 10464586 Gstp2         | NM_181796    | 1.22439e-005 | 1.51186 | E11.5 * Sox10 up vs E11.5 * Ctrl |
| 10540880 Syn2          | NM_001111015 | 2.06812e-005 | 1.51184 | E11.5 * Sox10 up vs E11.5 * Ctrl |
| 10352554               | ---          | 0.00032385   | 1.51143 | E11.5 * Sox10 up vs E11.5 * Ctrl |
| 10355141 Klf7          | NM_033563    | 2.39209e-007 | 1.5109  | E11.5 * Sox10 up vs E11.5 * Ctrl |
| 10530201 Ugdh          | NM_009466    | 2.39783e-005 | 1.51065 | E11.5 * Sox10 up vs E11.5 * Ctrl |
| 10427772 Tars          | NM_033074    | 3.11203e-005 | 1.51    | E11.5 * Sox10 up vs E11.5 * Ctrl |
| 10363575 Dna2          | NM_177372    | 5.93231e-008 | 1.50993 | E11.5 * Sox10 up vs E11.5 * Ctrl |
| 10543686 Ube2h         | NM_009459    | 0.000229913  | 1.50992 | E11.5 * Sox10 up vs E11.5 * Ctrl |
| 10575512 Cog4          | NM_133973    | 7.37856e-006 | 1.50895 | E11.5 * Sox10 up vs E11.5 * Ctrl |
| 10590445 Snrk          | NM_133741    | 9.72013e-006 | 1.5086  | E11.5 * Sox10 up vs E11.5 * Ctrl |
| 10361023 Prox1         | NM_008937    | 0.00142728   | 1.50856 | E11.5 * Sox10 up vs E11.5 * Ctrl |
| 10499108 Glt2d2        | NM_177130    | 0.000177487  | 1.50843 | E11.5 * Sox10 up vs E11.5 * Ctrl |
| 10472794 Metap1        | NM_025633    | 0.000228728  | 1.50814 | E11.5 * Sox10 up vs E11.5 * Ctrl |
| 10358668 Hmcn1         | NM_001024720 | 7.06355e-006 | 1.50736 | E11.5 * Sox10 up vs E11.5 * Ctrl |
| 10455372 C330007P06Rik | NM_029951    | 5.27853e-005 | 1.50735 | E11.5 * Sox10 up vs E11.5 * Ctrl |
| 10434348 Elf2b5        | NM_172265    | 8.38452e-006 | 1.50732 | E11.5 * Sox10 up vs E11.5 * Ctrl |
| 10569429 Cdkn1c        | NM_009876    | 1.00912e-008 | 1.50636 | E11.5 * Sox10 up vs E11.5 * Ctrl |
| 10463138 Dppa2         | NM_028615    | 0.000358575  | 1.50629 | E11.5 * Sox10 up vs E11.5 * Ctrl |
| 10579607 B3gnt3        | BC026418     | 0.00493536   | 1.50585 | E11.5 * Sox10 up vs E11.5 * Ctrl |
| 10595094 2310046A06Rik | BC089626     | 0.00227359   | 1.50576 | E11.5 * Sox10 up vs E11.5 * Ctrl |
| 10523479 Slc25a5       | NM_007451    | 9.64535e-007 | 1.50561 | E11.5 * Sox10 up vs E11.5 * Ctrl |
| 10607587 Pdha1         | NM_008810    | 8.96611e-006 | 1.50543 | E11.5 * Sox10 up vs E11.5 * Ctrl |
| 10495343 Wdr47         | NM_181400    | 0.000781772  | 1.50504 | E11.5 * Sox10 up vs E11.5 * Ctrl |
| 10435271 Heg1          | NM_175256    | 1.02027e-006 | 1.505   | E11.5 * Sox10 up vs E11.5 * Ctrl |
| 10376747 Kcnj12        | NM_010603    | 0.000153289  | 1.50397 | E11.5 * Sox10 up vs E11.5 * Ctrl |
| 10413726 Tnnc1         | NM_009393    | 0.00918489   | 1.50386 | E11.5 * Sox10 up vs E11.5 * Ctrl |
| 10356154 Sphkap        | NM_172430    | 0.00254683   | 1.5038  | E11.5 * Sox10 up vs E11.5 * Ctrl |
| 10356833 Stk25         | NM_021537    | 0.000434623  | 1.50303 | E11.5 * Sox10 up vs E11.5 * Ctrl |
| 10476314 Prnp          | NM_011170    | 2.35192e-006 | 1.5025  | E11.5 * Sox10 up vs E11.5 * Ctrl |
| 10470027 Npdc1         | NM_008721    | 0.000115692  | 1.50191 | E11.5 * Sox10 up vs E11.5 * Ctrl |
| 10469936 Nrarp         | NM_025980    | 3.82045e-006 | 1.50144 | E11.5 * Sox10 up vs E11.5 * Ctrl |

|          |               |               |              |         |                                  |
|----------|---------------|---------------|--------------|---------|----------------------------------|
| 10373388 | Obfc2b        | NM_027257     | 0.000227461  | 1.50131 | E11.5 * Sox10 up vs E11.5 * Ctrl |
| 10411882 | Nln           | NM_029447     | 1.07048e-005 | 1.50128 | E11.5 * Sox10 up vs E11.5 * Ctrl |
| 10465521 | Plcb3         | NM_008874     | 5.55818e-006 | 1.50063 | E11.5 * Sox10 up vs E11.5 * Ctrl |
| 10367122 | Baz2a         | NM_054078     | 1.6382e-008  | 1.50044 | E11.5 * Sox10 up vs E11.5 * Ctrl |
| 10583145 | Tmem123       | NM_133739     | 7.25596e-007 | 1.49995 | E11.5 * Sox10 up vs E11.5 * Ctrl |
| 10494595 | Notch2        | NM_010928     | 4.99257e-005 | 1.49989 | E11.5 * Sox10 up vs E11.5 * Ctrl |
| 10363901 | Etv5          | NM_023794     | 1.9e-005     | 1.49985 | E11.5 * Sox10 up vs E11.5 * Ctrl |
| 10484888 | Ptprij        | NM_008982     | 0.000332893  | 1.49959 | E11.5 * Sox10 up vs E11.5 * Ctrl |
| 10378914 | Myo18a        | NM_011586     | 9.75163e-008 | 1.49953 | E11.5 * Sox10 up vs E11.5 * Ctrl |
| 10358527 | Hmcn1         | NM_001024720  | 0.00069359   | 1.49935 | E11.5 * Sox10 up vs E11.5 * Ctrl |
| 10527516 | Wasf3         | NM_145155     | 0.000127256  | 1.49934 | E11.5 * Sox10 up vs E11.5 * Ctrl |
| 10458461 | Hdac3         | NM_010411     | 1.55357e-006 | 1.49897 | E11.5 * Sox10 up vs E11.5 * Ctrl |
| 10368577 | Rnf217        | NM_001146349  | 0.000102621  | 1.49891 | E11.5 * Sox10 up vs E11.5 * Ctrl |
| 10352815 | Irf6          | NM_016851     | 9.45387e-005 | 1.49763 | E11.5 * Sox10 up vs E11.5 * Ctrl |
| 10374529 | AV249152      | NM_145425     | 4.36692e-005 | 1.49759 | E11.5 * Sox10 up vs E11.5 * Ctrl |
| 10440929 | Gart          | NM_010256     | 1.28013e-006 | 1.49697 | E11.5 * Sox10 up vs E11.5 * Ctrl |
| 10540391 | Trnt1         | NM_027296     | 6.33339e-005 | 1.49687 | E11.5 * Sox10 up vs E11.5 * Ctrl |
| 10358625 | Hmcn1         | NM_001024720  | 0.00195034   | 1.49678 | E11.5 * Sox10 up vs E11.5 * Ctrl |
| 10534120 | Asl           | NM_133768     | 1.98871e-005 | 1.49648 | E11.5 * Sox10 up vs E11.5 * Ctrl |
| 10350146 | Phlda3        | NM_013750     | 0.000139638  | 1.49637 | E11.5 * Sox10 up vs E11.5 * Ctrl |
| 10358615 | Hmcn1         | NM_001024720  | 0.000325784  | 1.49586 | E11.5 * Sox10 up vs E11.5 * Ctrl |
| 10540544 | Thumpd3       | NM_008188     | 1.40495e-006 | 1.49578 | E11.5 * Sox10 up vs E11.5 * Ctrl |
| 10380815 | Psmb3         | NM_011971     | 0.000839994  | 1.49567 | E11.5 * Sox10 up vs E11.5 * Ctrl |
| 10445325 | Rcan2         | NM_030598     | 0.00232065   | 1.49557 | E11.5 * Sox10 up vs E11.5 * Ctrl |
| 10388861 | Tmem199       | NM_199199     | 0.000894765  | 1.49544 | E11.5 * Sox10 up vs E11.5 * Ctrl |
| 10583992 | Igsf9b        | NM_001129787  | 1.49281e-006 | 1.49501 | E11.5 * Sox10 up vs E11.5 * Ctrl |
| 10593966 | Csk           | NM_007783     | 0.00199374   | 1.495   | E11.5 * Sox10 up vs E11.5 * Ctrl |
| 10358591 | Hmcn1         | NM_001024720  | 0.000258073  | 1.49489 | E11.5 * Sox10 up vs E11.5 * Ctrl |
| 10376021 | 08-Sep        | NM_033144     | 1.59333e-005 | 1.49461 | E11.5 * Sox10 up vs E11.5 * Ctrl |
| 10485388 | Ldlrad3       | NM_178886     | 0.000111367  | 1.4945  | E11.5 * Sox10 up vs E11.5 * Ctrl |
| 10493309 | Rit1          | NM_009069     | 0.00154344   | 1.49408 | E11.5 * Sox10 up vs E11.5 * Ctrl |
| 10358603 | Hmcn1         | NM_001024720  | 0.000388744  | 1.49369 | E11.5 * Sox10 up vs E11.5 * Ctrl |
| 10481368 | Trub2         | NM_145520     | 3.47377e-005 | 1.49347 | E11.5 * Sox10 up vs E11.5 * Ctrl |
| 10361152 | Gstp2         | NM_181796     | 1.01979e-005 | 1.49325 | E11.5 * Sox10 up vs E11.5 * Ctrl |
| 10437590 | Carhsp1       | NM_025821     | 2.98208e-007 | 1.4929  | E11.5 * Sox10 up vs E11.5 * Ctrl |
| 10409767 | Golm1         | NM_027307     | 9.78481e-005 | 1.49258 | E11.5 * Sox10 up vs E11.5 * Ctrl |
| 10419073 | Tspan14       | NM_145928     | 3.02676e-005 | 1.49238 | E11.5 * Sox10 up vs E11.5 * Ctrl |
| 10444932 | 2310014H01Rik | NM_001146711  | 7.67374e-005 | 1.49203 | E11.5 * Sox10 up vs E11.5 * Ctrl |
| 10456400 | Tubb6         | NM_026473     | 2.07021e-007 | 1.49126 | E11.5 * Sox10 up vs E11.5 * Ctrl |
| 10404763 | Tmem170b      | XM_886379     | 2.72844e-005 | 1.49122 | E11.5 * Sox10 up vs E11.5 * Ctrl |
| 10571399 | Zdhhc2        | NM_178395     | 0.000802059  | 1.49103 | E11.5 * Sox10 up vs E11.5 * Ctrl |
| 10358593 | Hmcn1         | NM_001024720  | 0.000437138  | 1.49066 | E11.5 * Sox10 up vs E11.5 * Ctrl |
| 10497309 | Snx16         | NM_029068     | 0.00578064   | 1.49053 | E11.5 * Sox10 up vs E11.5 * Ctrl |
| 10363231 | Smpd13a       | NM_020561     | 0.000337425  | 1.49006 | E11.5 * Sox10 up vs E11.5 * Ctrl |
| 10578222 | Dlc1          | NM_015802     | 4.60255e-005 | 1.49005 | E11.5 * Sox10 up vs E11.5 * Ctrl |
| 10436666 | Jam2          | NM_023844     | 4.74854e-005 | 1.48969 | E11.5 * Sox10 up vs E11.5 * Ctrl |
| 10479948 | Cugbp2        | NM_001110228  | 0.00427309   | 1.48936 | E11.5 * Sox10 up vs E11.5 * Ctrl |
| 10371904 | 1110012L19Rik | NM_026787     | 0.00409605   | 1.48888 | E11.5 * Sox10 up vs E11.5 * Ctrl |
| 10501629 | Cdc14a        | NM_001080818  | 5.72019e-007 | 1.48884 | E11.5 * Sox10 up vs E11.5 * Ctrl |
| 10438702 | St6gal1       | NM_145933     | 0.00100408   | 1.48881 | E11.5 * Sox10 up vs E11.5 * Ctrl |
| 10418185 | D14Ert449e    | NM_025311     | 0.000174213  | 1.48836 | E11.5 * Sox10 up vs E11.5 * Ctrl |
| 10393970 | Fasn          | NM_007988     | 0.00310757   | 1.48823 | E11.5 * Sox10 up vs E11.5 * Ctrl |
| 10358457 | Bex4          | NM_212457     | 3.1924e-005  | 1.4877  | E11.5 * Sox10 up vs E11.5 * Ctrl |
| 10365482 | Timp3         | NM_011595     | 0.00147749   | 1.48764 | E11.5 * Sox10 up vs E11.5 * Ctrl |
| 10484894 | Ptprij        | NM_008982     | 0.000244248  | 1.48709 | E11.5 * Sox10 up vs E11.5 * Ctrl |
| 10570178 | A230072I06Rik | ENSMUST000001 | 0.00624946   | 1.48686 | E11.5 * Sox10 up vs E11.5 * Ctrl |
| 10567355 | Gprc5b        | NM_022420     | 1.32305e-005 | 1.48649 | E11.5 * Sox10 up vs E11.5 * Ctrl |
| 10368011 | Vta1          | NM_025418     | 1.62072e-006 | 1.48615 | E11.5 * Sox10 up vs E11.5 * Ctrl |
| 10392207 | Tex2          | NM_198292     | 0.00019329   | 1.48591 | E11.5 * Sox10 up vs E11.5 * Ctrl |
| 10578623 | Wwc2          | NM_133791     | 2.71897e-007 | 1.48558 | E11.5 * Sox10 up vs E11.5 * Ctrl |
| 10455656 | Hsd17b4       | NM_008292     | 3.54082e-008 | 1.48536 | E11.5 * Sox10 up vs E11.5 * Ctrl |
| 10435057 | Pcyt1a        | NM_009981     | 4.4827e-005  | 1.48527 | E11.5 * Sox10 up vs E11.5 * Ctrl |
| 10518726 | Slc25a33      | NM_027460     | 2.62317e-006 | 1.48525 | E11.5 * Sox10 up vs E11.5 * Ctrl |
| 10479749 | Rpp38         | NM_001013376  | 0.00882615   | 1.48513 | E11.5 * Sox10 up vs E11.5 * Ctrl |
| 10411274 | Sv2c          | NM_029210     | 8.03454e-005 | 1.48505 | E11.5 * Sox10 up vs E11.5 * Ctrl |
| 10535080 | Cox19         | NM_197980     | 7.79657e-005 | 1.48492 | E11.5 * Sox10 up vs E11.5 * Ctrl |

|                        |              |              |         |                                  |
|------------------------|--------------|--------------|---------|----------------------------------|
| 10358561 Hmcn1         | NM_001024720 | 0.000767059  | 1.48407 | E11.5 * Sox10 up vs E11.5 * Ctrl |
| 10358541 Hmcn1         | NM_001024720 | 0.00762955   | 1.48382 | E11.5 * Sox10 up vs E11.5 * Ctrl |
| 10467730 Morn4         | NM_198108    | 0.00840981   | 1.48283 | E11.5 * Sox10 up vs E11.5 * Ctrl |
| 10599215 Slc25a5       | NM_007451    | 8.25207e-007 | 1.4828  | E11.5 * Sox10 up vs E11.5 * Ctrl |
| 10495094 6530418L21Rik | BC052371     | 4.09742e-005 | 1.48265 | E11.5 * Sox10 up vs E11.5 * Ctrl |
| 10396919 4933426M11Rik | BC040401     | 5.6074e-007  | 1.4813  | E11.5 * Sox10 up vs E11.5 * Ctrl |
| 10582916               | ---          | 0.00649806   | 1.48099 | E11.5 * Sox10 up vs E11.5 * Ctrl |
| 10394778 Hpcal1        | NM_016677    | 0.000905263  | 1.48087 | E11.5 * Sox10 up vs E11.5 * Ctrl |
| 10469613 Thnsl1        | NM_177588    | 4.0847e-005  | 1.47976 | E11.5 * Sox10 up vs E11.5 * Ctrl |
| 10515399 Plk3          | NM_013807    | 0.00439164   | 1.47968 | E11.5 * Sox10 up vs E11.5 * Ctrl |
| 10447341 Rhoq          | NM_145491    | 6.12419e-005 | 1.47965 | E11.5 * Sox10 up vs E11.5 * Ctrl |
| 10558454 Glrx3         | NM_023140    | 0.000121688  | 1.47911 | E11.5 * Sox10 up vs E11.5 * Ctrl |
| 10358589 Hmcn1         | NM_001024720 | 0.000327466  | 1.47805 | E11.5 * Sox10 up vs E11.5 * Ctrl |
| 10373814 Pes1          | NM_022889    | 0.000163483  | 1.47804 | E11.5 * Sox10 up vs E11.5 * Ctrl |
| 10595466 Pgm3          | NM_028352    | 8.19919e-006 | 1.47801 | E11.5 * Sox10 up vs E11.5 * Ctrl |
| 10418198 D14Ertd449e   | NM_025311    | 0.000155937  | 1.47778 | E11.5 * Sox10 up vs E11.5 * Ctrl |
| 10573128 Tbc1d9        | NM_001111304 | 6.22221e-009 | 1.47765 | E11.5 * Sox10 up vs E11.5 * Ctrl |
| 10417813 Ecd           | NM_027475    | 1.28034e-007 | 1.47722 | E11.5 * Sox10 up vs E11.5 * Ctrl |
| 10358563 Hmcn1         | NM_001024720 | 0.000138021  | 1.47696 | E11.5 * Sox10 up vs E11.5 * Ctrl |
| 10394929 EG668662      | AK132630     | 0.000684587  | 1.47693 | E11.5 * Sox10 up vs E11.5 * Ctrl |
| 10355960 Scg2          | NM_009129    | 0.00604018   | 1.47632 | E11.5 * Sox10 up vs E11.5 * Ctrl |
| 10534575 Prkip1        | NM_025774    | 3.13282e-006 | 1.47627 | E11.5 * Sox10 up vs E11.5 * Ctrl |
| 10399419 Tubb2b        | NM_023716    | 0.000177683  | 1.47582 | E11.5 * Sox10 up vs E11.5 * Ctrl |
| 10412100 Map3k1        | NM_011945    | 0.000160302  | 1.47576 | E11.5 * Sox10 up vs E11.5 * Ctrl |
| 10545672 Mthfd2        | NM_008638    | 0.000210337  | 1.47492 | E11.5 * Sox10 up vs E11.5 * Ctrl |
| 10490159 Pmepa1        | NM_022995    | 3.83124e-005 | 1.47481 | E11.5 * Sox10 up vs E11.5 * Ctrl |
| 10510464 Lzic          | NM_026963    | 7.62881e-006 | 1.47477 | E11.5 * Sox10 up vs E11.5 * Ctrl |
| 10388898 1810009O10Rik | BC027022     | 0.00444148   | 1.47456 | E11.5 * Sox10 up vs E11.5 * Ctrl |
| 10387757 Rai12         | NM_018740    | 0.0002753    | 1.47413 | E11.5 * Sox10 up vs E11.5 * Ctrl |
| 10406823               | ---          | 0.00454893   | 1.47411 | E11.5 * Sox10 up vs E11.5 * Ctrl |
| 10378870 Git1          | NM_001004144 | 0.000912006  | 1.4737  | E11.5 * Sox10 up vs E11.5 * Ctrl |
| 10379223 1810012P15Rik | NM_001076681 | 0.000399967  | 1.47325 | E11.5 * Sox10 up vs E11.5 * Ctrl |
| 10499168 Kirrel        | NM_130867    | 0.00147647   | 1.47275 | E11.5 * Sox10 up vs E11.5 * Ctrl |
| 10365833 Usp44         | NM_183199    | 0.000662196  | 1.47259 | E11.5 * Sox10 up vs E11.5 * Ctrl |
| 10418002 EG620119      | XM_884506    | 0.000468481  | 1.47257 | E11.5 * Sox10 up vs E11.5 * Ctrl |
| 10556178 Tub           | NM_021885    | 4.64704e-005 | 1.47243 | E11.5 * Sox10 up vs E11.5 * Ctrl |
| 10365518 Nt5dc3        | NM_175331    | 0.000591371  | 1.47232 | E11.5 * Sox10 up vs E11.5 * Ctrl |
| 10379543 Tmem132e      | NM_023438    | 0.000415099  | 1.47151 | E11.5 * Sox10 up vs E11.5 * Ctrl |
| 10394158 Kif3c         | NM_008445    | 7.54752e-005 | 1.47078 | E11.5 * Sox10 up vs E11.5 * Ctrl |
| 10460517 Brms1         | NM_134155    | 0.000495911  | 1.47061 | E11.5 * Sox10 up vs E11.5 * Ctrl |
| 10594590 Snx1          | NM_019727    | 2.30981e-006 | 1.47049 | E11.5 * Sox10 up vs E11.5 * Ctrl |
| 10360460 Chml          | NM_021350    | 0.000615876  | 1.46877 | E11.5 * Sox10 up vs E11.5 * Ctrl |
| 10409338 Nop16         | NM_178605    | 0.000290821  | 1.46848 | E11.5 * Sox10 up vs E11.5 * Ctrl |
| 10461093 Pla2g16       | NM_139269    | 0.00153217   | 1.46827 | E11.5 * Sox10 up vs E11.5 * Ctrl |
| 10579335 Pgpep1        | NM_023217    | 6.34114e-006 | 1.46793 | E11.5 * Sox10 up vs E11.5 * Ctrl |
| 10405211 Gadd45g       | NM_011817    | 0.00207839   | 1.46742 | E11.5 * Sox10 up vs E11.5 * Ctrl |
| 10572730 Zfp617        | NM_133358    | 0.00958889   | 1.46672 | E11.5 * Sox10 up vs E11.5 * Ctrl |
| 10499062 Fhdc1         | NM_001033301 | 0.00548966   | 1.46666 | E11.5 * Sox10 up vs E11.5 * Ctrl |
| 10385283 Gabrg2        | NM_008073    | 0.00167543   | 1.46556 | E11.5 * Sox10 up vs E11.5 * Ctrl |
| 10566714 Ric3          | NM_001038624 | 0.000100906  | 1.46532 | E11.5 * Sox10 up vs E11.5 * Ctrl |
| 10417065 Rap2a         | NM_029519    | 1.43201e-006 | 1.46517 | E11.5 * Sox10 up vs E11.5 * Ctrl |
| 10371230 Gna11         | NM_010301    | 0.000102096  | 1.465   | E11.5 * Sox10 up vs E11.5 * Ctrl |
| 10449920 Zfp811        | NM_183177    | 0.00184202   | 1.4648  | E11.5 * Sox10 up vs E11.5 * Ctrl |
| 10426397 Cntn1         | NM_007727    | 0.000298203  | 1.46462 | E11.5 * Sox10 up vs E11.5 * Ctrl |
| 10442914 0610011F06Rik | NM_026686    | 1.10684e-005 | 1.46439 | E11.5 * Sox10 up vs E11.5 * Ctrl |
| 10418210 D14Ertd449e   | NM_025311    | 0.000182896  | 1.46439 | E11.5 * Sox10 up vs E11.5 * Ctrl |
| 10363905 Zwint         | NM_025635    | 1.25815e-007 | 1.46339 | E11.5 * Sox10 up vs E11.5 * Ctrl |
| 10472436 B3galt1       | NM_020283    | 0.000239672  | 1.46312 | E11.5 * Sox10 up vs E11.5 * Ctrl |
| 10354031 Tsga10        | NM_207228    | 0.00164176   | 1.46307 | E11.5 * Sox10 up vs E11.5 * Ctrl |
| 10413255 Duxbl         | NM_183389    | 0.000449755  | 1.463   | E11.5 * Sox10 up vs E11.5 * Ctrl |
| 10413265 Duxbl         | NM_183389    | 0.000449755  | 1.463   | E11.5 * Sox10 up vs E11.5 * Ctrl |
| 10491300 Skil          | NM_011386    | 1.21251e-005 | 1.46273 | E11.5 * Sox10 up vs E11.5 * Ctrl |
| 10379654 Ap2b1         | NM_001035854 | 8.57493e-008 | 1.46266 | E11.5 * Sox10 up vs E11.5 * Ctrl |
| 10367734 Ust           | NM_177387    | 0.000169418  | 1.46229 | E11.5 * Sox10 up vs E11.5 * Ctrl |
| 10568529 Ikzf5         | NM_175115    | 0.00248884   | 1.46219 | E11.5 * Sox10 up vs E11.5 * Ctrl |
| 10485151 Mapk8ip1      | NM_011162    | 0.000191319  | 1.46215 | E11.5 * Sox10 up vs E11.5 * Ctrl |

|          |               |              |              |         |                                  |
|----------|---------------|--------------|--------------|---------|----------------------------------|
| 10580537 | Aktip         | NM_010241    | 0.000199766  | 1.46198 | E11.5 * Sox10 up vs E11.5 * Ctrl |
| 10512226 | Wdr40a        | NM_026893    | 6.09039e-005 | 1.46138 | E11.5 * Sox10 up vs E11.5 * Ctrl |
| 10504703 | AU014645      | NM_001033201 | 1.28778e-006 | 1.46129 | E11.5 * Sox10 up vs E11.5 * Ctrl |
| 10512308 | Sigmar1       | NM_011014    | 0.00051085   | 1.4612  | E11.5 * Sox10 up vs E11.5 * Ctrl |
| 10456587 | Mro           | NM_027741    | 8.90289e-005 | 1.46087 | E11.5 * Sox10 up vs E11.5 * Ctrl |
| 10524941 | Fbxo21        | NM_145564    | 2.60234e-005 | 1.46083 | E11.5 * Sox10 up vs E11.5 * Ctrl |
| 10593937 | Mpi           | NM_025837    | 1.44518e-005 | 1.4605  | E11.5 * Sox10 up vs E11.5 * Ctrl |
| 10524882 | Wsb2          | NM_021539    | 0.000106339  | 1.46037 | E11.5 * Sox10 up vs E11.5 * Ctrl |
| 10477297 | Kif3b         | NM_008444    | 7.63669e-005 | 1.46028 | E11.5 * Sox10 up vs E11.5 * Ctrl |
| 10372116 | Csl           | NM_027945    | 6.41134e-007 | 1.46002 | E11.5 * Sox10 up vs E11.5 * Ctrl |
| 10509777 | Iifo2         | NM_183148    | 8.7299e-005  | 1.45993 | E11.5 * Sox10 up vs E11.5 * Ctrl |
| 10501909 | Mettl14       | NM_201638    | 1.34603e-007 | 1.4599  | E11.5 * Sox10 up vs E11.5 * Ctrl |
| 10512391 | Vcp           | NM_009503    | 7.22416e-008 | 1.4595  | E11.5 * Sox10 up vs E11.5 * Ctrl |
| 10599498 | Utp14a        | NM_028276    | 1.32833e-007 | 1.45949 | E11.5 * Sox10 up vs E11.5 * Ctrl |
| 10524684 | Msi1          | NM_008629    | 0.00341775   | 1.45924 | E11.5 * Sox10 up vs E11.5 * Ctrl |
| 10587604 | Rwdd2a        | NM_027100    | 0.000237359  | 1.45905 | E11.5 * Sox10 up vs E11.5 * Ctrl |
| 10346235 | Hibch         | NM_146108    | 0.00051592   | 1.45862 | E11.5 * Sox10 up vs E11.5 * Ctrl |
| 10416037 | Pbk           | NM_023209    | 0.000544444  | 1.45853 | E11.5 * Sox10 up vs E11.5 * Ctrl |
| 10359851 | Uck2          | NM_030724    | 4.21804e-005 | 1.45787 | E11.5 * Sox10 up vs E11.5 * Ctrl |
| 10382701 | Sap30bp       | NM_020483    | 0.000222588  | 1.45787 | E11.5 * Sox10 up vs E11.5 * Ctrl |
| 10394625 | ---           | ---          | 0.00205228   | 1.45698 | E11.5 * Sox10 up vs E11.5 * Ctrl |
| 10517425 | Lypla2        | NM_011942    | 0.00500603   | 1.45695 | E11.5 * Sox10 up vs E11.5 * Ctrl |
| 10437580 | ---           | ---          | 0.00187248   | 1.45678 | E11.5 * Sox10 up vs E11.5 * Ctrl |
| 10601850 | Bex4          | NM_212457    | 1.69703e-005 | 1.45677 | E11.5 * Sox10 up vs E11.5 * Ctrl |
| 10538082 | Atp6v0e2      | NM_133764    | 0.00013203   | 1.45674 | E11.5 * Sox10 up vs E11.5 * Ctrl |
| 10349239 | Mki67ip       | NM_026472    | 9.9666e-006  | 1.45613 | E11.5 * Sox10 up vs E11.5 * Ctrl |
| 10570144 | Arhgef7       | NM_001113518 | 5.24067e-007 | 1.45553 | E11.5 * Sox10 up vs E11.5 * Ctrl |
| 10476189 | Mrps26        | NM_207207    | 0.000924185  | 1.45508 | E11.5 * Sox10 up vs E11.5 * Ctrl |
| 10463535 | Nolc1         | NM_053086    | 2.11479e-006 | 1.45462 | E11.5 * Sox10 up vs E11.5 * Ctrl |
| 10538290 | Snx10         | NM_028035    | 5.46868e-005 | 1.45402 | E11.5 * Sox10 up vs E11.5 * Ctrl |
| 10562989 | Cpt1c         | NM_153679    | 3.40567e-005 | 1.4534  | E11.5 * Sox10 up vs E11.5 * Ctrl |
| 10526113 | Crcp          | NM_007761    | 0.00681585   | 1.45318 | E11.5 * Sox10 up vs E11.5 * Ctrl |
| 10555953 | Fxc1          | NM_019502    | 3.27581e-005 | 1.45291 | E11.5 * Sox10 up vs E11.5 * Ctrl |
| 10422052 | Commdd6       | NM_001033132 | 0.0003072    | 1.45258 | E11.5 * Sox10 up vs E11.5 * Ctrl |
| 10503508 | Ggh           | NM_010281    | 0.000106172  | 1.45255 | E11.5 * Sox10 up vs E11.5 * Ctrl |
| 10503523 | Ggh           | NM_010281    | 0.000106172  | 1.45255 | E11.5 * Sox10 up vs E11.5 * Ctrl |
| 10552311 | OTTMUSG00000  | XR_030737    | 2.19083e-005 | 1.45118 | E11.5 * Sox10 up vs E11.5 * Ctrl |
| 10510391 | Srm           | NM_009272    | 7.24846e-005 | 1.45087 | E11.5 * Sox10 up vs E11.5 * Ctrl |
| 10345230 | Rab23         | NM_008999    | 8.91545e-006 | 1.45072 | E11.5 * Sox10 up vs E11.5 * Ctrl |
| 10397332 | Eif2b2        | NM_145445    | 0.00253702   | 1.45022 | E11.5 * Sox10 up vs E11.5 * Ctrl |
| 10488589 | Fam110a       | NM_028666    | 8.68368e-005 | 1.45019 | E11.5 * Sox10 up vs E11.5 * Ctrl |
| 10509838 | Padi2         | NM_008812    | 0.00324916   | 1.44983 | E11.5 * Sox10 up vs E11.5 * Ctrl |
| 10451665 | Apobec2       | NM_009694    | 0.00122532   | 1.44935 | E11.5 * Sox10 up vs E11.5 * Ctrl |
| 10355214 | Idh1          | NM_010497    | 1.01298e-006 | 1.4493  | E11.5 * Sox10 up vs E11.5 * Ctrl |
| 10384452 | Ublcp1        | NM_024475    | 0.000555528  | 1.44927 | E11.5 * Sox10 up vs E11.5 * Ctrl |
| 10425116 | Cdc42ep1      | NM_027219    | 0.00404519   | 1.44892 | E11.5 * Sox10 up vs E11.5 * Ctrl |
| 10463799 | EG329070      | ENSMUST00000 | 2.54298e-006 | 1.44883 | E11.5 * Sox10 up vs E11.5 * Ctrl |
| 10497214 | Tpd52         | NM_001025261 | 0.00294993   | 1.44877 | E11.5 * Sox10 up vs E11.5 * Ctrl |
| 10380226 | Cuedc1        | NM_198013    | 0.0018592    | 1.44872 | E11.5 * Sox10 up vs E11.5 * Ctrl |
| 10413243 | Duxbl         | NM_183389    | 0.000582328  | 1.44797 | E11.5 * Sox10 up vs E11.5 * Ctrl |
| 10546346 | Chchd4        | NM_133928    | 0.000107341  | 1.44767 | E11.5 * Sox10 up vs E11.5 * Ctrl |
| 10405729 | Selk          | NM_019979    | 0.000375579  | 1.44735 | E11.5 * Sox10 up vs E11.5 * Ctrl |
| 10426835 | Dip2b         | NM_001159361 | 4.13978e-006 | 1.44732 | E11.5 * Sox10 up vs E11.5 * Ctrl |
| 10375234 | Nudcd2        | NM_026023    | 3.01185e-008 | 1.44711 | E11.5 * Sox10 up vs E11.5 * Ctrl |
| 10386636 | Usp22         | NM_001004143 | 6.03119e-007 | 1.44693 | E11.5 * Sox10 up vs E11.5 * Ctrl |
| 10456378 | Chmp1b        | NM_024190    | 0.00164988   | 1.44678 | E11.5 * Sox10 up vs E11.5 * Ctrl |
| 10535449 | E130309D02Rik | NM_172726    | 0.000272247  | 1.44676 | E11.5 * Sox10 up vs E11.5 * Ctrl |
| 10358733 | Rgl1          | NM_016846    | 0.000160931  | 1.44614 | E11.5 * Sox10 up vs E11.5 * Ctrl |
| 10388465 | Doc2b         | NM_007873    | 0.000133277  | 1.44607 | E11.5 * Sox10 up vs E11.5 * Ctrl |
| 10450957 | Cenpq         | NM_031863    | 0.000599826  | 1.44605 | E11.5 * Sox10 up vs E11.5 * Ctrl |
| 10455227 | Rnf14         | NM_020012    | 5.39459e-008 | 1.44604 | E11.5 * Sox10 up vs E11.5 * Ctrl |
| 10604637 | Cxx1b         | NM_001018063 | 2.38387e-007 | 1.44573 | E11.5 * Sox10 up vs E11.5 * Ctrl |
| 10380415 | Cdc34         | BC094502     | 0.000617371  | 1.44573 | E11.5 * Sox10 up vs E11.5 * Ctrl |
| 10424607 | Ptp4a3        | NM_008975    | 0.00114285   | 1.44535 | E11.5 * Sox10 up vs E11.5 * Ctrl |
| 10603000 | Rai2          | NM_198409    | 0.00709819   | 1.44527 | E11.5 * Sox10 up vs E11.5 * Ctrl |
| 10404827 | Nol7          | NM_023554    | 2.3789e-005  | 1.44478 | E11.5 * Sox10 up vs E11.5 * Ctrl |

|                        |              |              |         |                                  |
|------------------------|--------------|--------------|---------|----------------------------------|
| 10445241 Tnfrsf21      | NM_178589    | 6.10692e-005 | 1.44421 | E11.5 * Sox10 up vs E11.5 * Ctrl |
| 10357220 Tmem177       | NM_175106    | 0.00317905   | 1.44397 | E11.5 * Sox10 up vs E11.5 * Ctrl |
| 10516371 Eif2c1        | NM_153403    | 0.000168404  | 1.44367 | E11.5 * Sox10 up vs E11.5 * Ctrl |
| 10355958 Ube2v1        | NM_023230    | 0.000139268  | 1.44336 | E11.5 * Sox10 up vs E11.5 * Ctrl |
| 10457834               | ---          | 0.00229022   | 1.4432  | E11.5 * Sox10 up vs E11.5 * Ctrl |
| 10372682 Slc35e3       | NM_029875    | 0.00757681   | 1.44307 | E11.5 * Sox10 up vs E11.5 * Ctrl |
| 10452556 Rab12         | NM_024448    | 0.00147124   | 1.44273 | E11.5 * Sox10 up vs E11.5 * Ctrl |
| 10440840 1110004E09Rik | BC019533     | 4.26047e-006 | 1.44234 | E11.5 * Sox10 up vs E11.5 * Ctrl |
| 10492325 Ube2v1        | NM_023230    | 6.51712e-005 | 1.44234 | E11.5 * Sox10 up vs E11.5 * Ctrl |
| 10375893 Sar1b         | NM_025535    | 4.99235e-007 | 1.44205 | E11.5 * Sox10 up vs E11.5 * Ctrl |
| 10527965 Cldn12        | NM_022890    | 0.010133     | 1.44167 | E11.5 * Sox10 up vs E11.5 * Ctrl |
| 10414325 Cgrrf1        | NM_026832    | 0.0016797    | 1.44114 | E11.5 * Sox10 up vs E11.5 * Ctrl |
| 10492590 Ppm1l         | NM_178726    | 0.000325186  | 1.44087 | E11.5 * Sox10 up vs E11.5 * Ctrl |
| 10540105 Tmem43        | NM_028766    | 0.000480052  | 1.44037 | E11.5 * Sox10 up vs E11.5 * Ctrl |
| 10534531 Ywhag         | NM_018871    | 0.000672894  | 1.43988 | E11.5 * Sox10 up vs E11.5 * Ctrl |
| 10542791 Ppfibp1       | NM_026221    | 3.48077e-005 | 1.43962 | E11.5 * Sox10 up vs E11.5 * Ctrl |
| 10497285 Impa1         | NM_018864    | 0.00141053   | 1.43933 | E11.5 * Sox10 up vs E11.5 * Ctrl |
| 10489694 Zfp334        | NM_178411    | 0.000212836  | 1.43908 | E11.5 * Sox10 up vs E11.5 * Ctrl |
| 10500582 Wdr3          | NM_175552    | 5.45203e-005 | 1.43856 | E11.5 * Sox10 up vs E11.5 * Ctrl |
| 10516064 Mfsd2         | NM_029662    | 0.00242619   | 1.43841 | E11.5 * Sox10 up vs E11.5 * Ctrl |
| 10442816 Lmf1          | NM_029624    | 3.8984e-005  | 1.43696 | E11.5 * Sox10 up vs E11.5 * Ctrl |
| 10545910 Pcyox1        | NM_025823    | 1.40621e-005 | 1.43629 | E11.5 * Sox10 up vs E11.5 * Ctrl |
| 10566804 Tmem9b        | NM_020050    | 0.000128765  | 1.4359  | E11.5 * Sox10 up vs E11.5 * Ctrl |
| 10589130 Celsr3        | NM_080437    | 0.000188934  | 1.43514 | E11.5 * Sox10 up vs E11.5 * Ctrl |
| 10469070 Nudt5         | NM_016918    | 6.18053e-005 | 1.43507 | E11.5 * Sox10 up vs E11.5 * Ctrl |
| 10573998 Ogfod1        | NM_177767    | 0.00348936   | 1.43458 | E11.5 * Sox10 up vs E11.5 * Ctrl |
| 10486875 Frmd5         | NM_172673    | 0.000139182  | 1.43396 | E11.5 * Sox10 up vs E11.5 * Ctrl |
| 10358559 Hmcn1         | NM_001024720 | 5.69378e-005 | 1.43391 | E11.5 * Sox10 up vs E11.5 * Ctrl |
| 10375973 Taf13         | NM_025444    | 6.31335e-005 | 1.43372 | E11.5 * Sox10 up vs E11.5 * Ctrl |
| 10375880 Nhp2          | NM_026631    | 0.000407494  | 1.43366 | E11.5 * Sox10 up vs E11.5 * Ctrl |
| 10409330 4833439L19Rik | BC033445     | 0.00482466   | 1.43361 | E11.5 * Sox10 up vs E11.5 * Ctrl |
| 10358670 Hmcn1         | NM_001024720 | 0.000104259  | 1.43323 | E11.5 * Sox10 up vs E11.5 * Ctrl |
| 10520842 Bre           | NM_181279    | 1.45118e-005 | 1.43299 | E11.5 * Sox10 up vs E11.5 * Ctrl |
| 10504218 Dnajb5        | NM_019874    | 0.000326956  | 1.43288 | E11.5 * Sox10 up vs E11.5 * Ctrl |
| 10379891 Ppm1d         | NM_016910    | 3.33661e-006 | 1.43279 | E11.5 * Sox10 up vs E11.5 * Ctrl |
| 10358666 Hmcn1         | NM_001024720 | 2.91627e-005 | 1.43254 | E11.5 * Sox10 up vs E11.5 * Ctrl |
| 10589041 Impdh2        | NM_011830    | 1.18172e-005 | 1.4325  | E11.5 * Sox10 up vs E11.5 * Ctrl |
| 10448034 Dll1          | NM_007865    | 0.000186527  | 1.43242 | E11.5 * Sox10 up vs E11.5 * Ctrl |
| 10376854 Pigl          | NM_001039536 | 3.72231e-005 | 1.43198 | E11.5 * Sox10 up vs E11.5 * Ctrl |
| 10606554 Nap1l3        | NM_138742    | 0.000629703  | 1.43181 | E11.5 * Sox10 up vs E11.5 * Ctrl |
| 10575685 Nudt7         | NM_024437    | 0.00708342   | 1.43174 | E11.5 * Sox10 up vs E11.5 * Ctrl |
| 10391454 Vat1          | NM_012037    | 0.00111356   | 1.43169 | E11.5 * Sox10 up vs E11.5 * Ctrl |
| 10383799 Tcn2          | NM_015749    | 1.4734e-005  | 1.4316  | E11.5 * Sox10 up vs E11.5 * Ctrl |
| 10381744 Arf2          | NM_007477    | 5.01992e-005 | 1.43057 | E11.5 * Sox10 up vs E11.5 * Ctrl |
| 10578810 Clcn3         | NM_173874    | 5.55426e-006 | 1.43054 | E11.5 * Sox10 up vs E11.5 * Ctrl |
| 10585214 Cryab         | NM_009964    | 0.00421741   | 1.4305  | E11.5 * Sox10 up vs E11.5 * Ctrl |
| 10411171 Pde8b         | NM_172263    | 7.76945e-006 | 1.43004 | E11.5 * Sox10 up vs E11.5 * Ctrl |
| 10531146 Mkrr1-ps1     | AF494488     | 0.000486699  | 1.42985 | E11.5 * Sox10 up vs E11.5 * Ctrl |
| 10478447 Stk4          | NM_021420    | 1.06524e-007 | 1.42947 | E11.5 * Sox10 up vs E11.5 * Ctrl |
| 10410959 Atg10         | NM_025770    | 0.00281281   | 1.4292  | E11.5 * Sox10 up vs E11.5 * Ctrl |
| 10363498 Ppa1          | NM_026438    | 4.2675e-007  | 1.42905 | E11.5 * Sox10 up vs E11.5 * Ctrl |
| 10445496 Yipf3         | NM_145353    | 0.0067888    | 1.42904 | E11.5 * Sox10 up vs E11.5 * Ctrl |
| 10431170 5031439G07Rik | NM_001033273 | 0.000182432  | 1.42902 | E11.5 * Sox10 up vs E11.5 * Ctrl |
| 10561335 Prkcz         | NM_008860    | 0.00797245   | 1.42893 | E11.5 * Sox10 up vs E11.5 * Ctrl |
| 10388227 Cyb5d2        | NM_001024926 | 0.00207037   | 1.42877 | E11.5 * Sox10 up vs E11.5 * Ctrl |
| 10489660 Elmo2         | NM_207706    | 0.000514849  | 1.4285  | E11.5 * Sox10 up vs E11.5 * Ctrl |
| 10467956 Bloc1s2       | BC065806     | 0.00129202   | 1.42844 | E11.5 * Sox10 up vs E11.5 * Ctrl |
| 10490838 Fabp5         | NM_010634    | 5.53895e-006 | 1.4278  | E11.5 * Sox10 up vs E11.5 * Ctrl |
| 10448865 Gnptg         | NM_172529    | 8.2608e-007  | 1.42755 | E11.5 * Sox10 up vs E11.5 * Ctrl |
| 10547521 Atp6v1e1      | NM_007510    | 0.000443145  | 1.42748 | E11.5 * Sox10 up vs E11.5 * Ctrl |
| 10405757 2010111I01Rik | NM_028079    | 5.61348e-005 | 1.42709 | E11.5 * Sox10 up vs E11.5 * Ctrl |
| 10381345 Psme3         | NM_011192    | 1.85767e-005 | 1.42688 | E11.5 * Sox10 up vs E11.5 * Ctrl |
| 10504551 Rg9mtd3       | NM_027266    | 1.97415e-005 | 1.42674 | E11.5 * Sox10 up vs E11.5 * Ctrl |
| 10518167 Trappc2       | NM_025432    | 0.00814362   | 1.42591 | E11.5 * Sox10 up vs E11.5 * Ctrl |
| 10518812 Camta1        | NM_001081557 | 0.000259884  | 1.42588 | E11.5 * Sox10 up vs E11.5 * Ctrl |
| 10497321 Pgam1         | NM_023418    | 1.55515e-005 | 1.42495 | E11.5 * Sox10 up vs E11.5 * Ctrl |

|                        |              |              |         |                                  |
|------------------------|--------------|--------------|---------|----------------------------------|
| 10571849 Fbxo8         | NM_015791    | 0.000567936  | 1.42436 | E11.5 * Sox10 up vs E11.5 * Ctrl |
| 10582981 Tfdp1         | NM_009361    | 7.48367e-006 | 1.42398 | E11.5 * Sox10 up vs E11.5 * Ctrl |
| 10503966 Aco1          | NM_007386    | 2.32547e-005 | 1.42344 | E11.5 * Sox10 up vs E11.5 * Ctrl |
| 10471474 Ak1           | NM_021515    | 0.00192224   | 1.42316 | E11.5 * Sox10 up vs E11.5 * Ctrl |
| 10404380 Dusp22        | NM_001037955 | 1.15064e-005 | 1.4226  | E11.5 * Sox10 up vs E11.5 * Ctrl |
| 10494551 Acp6          | NM_019800    | 0.000754816  | 1.42221 | E11.5 * Sox10 up vs E11.5 * Ctrl |
| 10587315 Gsta4         | NM_010357    | 7.07985e-005 | 1.42205 | E11.5 * Sox10 up vs E11.5 * Ctrl |
| 10395466 Dock4         | NM_172803    | 1.24854e-005 | 1.42194 | E11.5 * Sox10 up vs E11.5 * Ctrl |
| 10596543 Rad54l2       | NM_030730    | 0.00297015   | 1.42185 | E11.5 * Sox10 up vs E11.5 * Ctrl |
| 10461844 Gnaq          | NM_008139    | 3.18023e-005 | 1.42171 | E11.5 * Sox10 up vs E11.5 * Ctrl |
| 10538420 Gars          | NM_180678    | 1.13087e-007 | 1.42163 | E11.5 * Sox10 up vs E11.5 * Ctrl |
| 10393387 Jmjd6         | NM_033398    | 1.99394e-005 | 1.4216  | E11.5 * Sox10 up vs E11.5 * Ctrl |
| 10559415 Leng1         | NM_027203    | 0.000344313  | 1.42157 | E11.5 * Sox10 up vs E11.5 * Ctrl |
| 10542397 H2afj         | NM_177688    | 1.15112e-007 | 1.42152 | E11.5 * Sox10 up vs E11.5 * Ctrl |
| 10418766 Ankrd28       | NM_001024604 | 0.000123827  | 1.42118 | E11.5 * Sox10 up vs E11.5 * Ctrl |
| 10431154 Phf21b        | NM_001081166 | 0.000117689  | 1.42114 | E11.5 * Sox10 up vs E11.5 * Ctrl |
| 10551065 D930028M14Rik | ENSMUST00000 | 0.000240026  | 1.42105 | E11.5 * Sox10 up vs E11.5 * Ctrl |
| 10420672 Dleu7         | NM_173419    | 0.00286269   | 1.42071 | E11.5 * Sox10 up vs E11.5 * Ctrl |
| 10592126 Fam118b       | NM_194257    | 8.09316e-006 | 1.42018 | E11.5 * Sox10 up vs E11.5 * Ctrl |
| 10545041 Nap1l5        | NM_021432    | 0.0013126    | 1.41978 | E11.5 * Sox10 up vs E11.5 * Ctrl |
| 10397882 Chga          | NM_007693    | 0.000477042  | 1.41961 | E11.5 * Sox10 up vs E11.5 * Ctrl |
| 10592593 Tecta         | NM_009347    | 0.000442143  | 1.41951 | E11.5 * Sox10 up vs E11.5 * Ctrl |
| 10348580 Khlh30        | NM_027551    | 0.000392245  | 1.41911 | E11.5 * Sox10 up vs E11.5 * Ctrl |
| 10490061 Bcas1         | NM_029815    | 1.64279e-005 | 1.41896 | E11.5 * Sox10 up vs E11.5 * Ctrl |
| 10476817 Atpaf1        | NM_181040    | 0.00052401   | 1.41884 | E11.5 * Sox10 up vs E11.5 * Ctrl |
| 10353934 Actr1b        | NM_146107    | 0.00297053   | 1.41813 | E11.5 * Sox10 up vs E11.5 * Ctrl |
| 10589800 Clasp2        | NM_001114347 | 5.19377e-008 | 1.41793 | E11.5 * Sox10 up vs E11.5 * Ctrl |
| 10599321 Zbtb33        | NM_020256    | 0.00177256   | 1.41783 | E11.5 * Sox10 up vs E11.5 * Ctrl |
| 10457888 5730494M16Rik | NM_001004361 | 2.3479e-008  | 1.4177  | E11.5 * Sox10 up vs E11.5 * Ctrl |
| 10379968 Tubd1         | NM_019756    | 0.00788627   | 1.41749 | E11.5 * Sox10 up vs E11.5 * Ctrl |
| 10556005 Ilk           | NM_010562    | 3.40607e-006 | 1.41745 | E11.5 * Sox10 up vs E11.5 * Ctrl |
| 10598359 Syp           | NM_009305    | 0.000156537  | 1.41714 | E11.5 * Sox10 up vs E11.5 * Ctrl |
| 10537712 Gstk1         | NM_029555    | 0.000427489  | 1.41703 | E11.5 * Sox10 up vs E11.5 * Ctrl |
| 10519886 Sema3c        | NM_013657    | 4.51141e-006 | 1.41682 | E11.5 * Sox10 up vs E11.5 * Ctrl |
| 10605055 Haus7         | NM_028633    | 0.000521388  | 1.41638 | E11.5 * Sox10 up vs E11.5 * Ctrl |
| 10600114 Pnma3         | NM_153169    | 0.000967148  | 1.41618 | E11.5 * Sox10 up vs E11.5 * Ctrl |
| 10401997 Ptpn21        | NM_011877    | 2.24589e-005 | 1.41566 | E11.5 * Sox10 up vs E11.5 * Ctrl |
| 10504349 Creb3         | NM_013497    | 8.15677e-005 | 1.41538 | E11.5 * Sox10 up vs E11.5 * Ctrl |
| 10355176 4921521F21Rik | BC051128     | 0.000639701  | 1.41528 | E11.5 * Sox10 up vs E11.5 * Ctrl |
| 10579799 Tmem184c      | NM_145599    | 4.57273e-005 | 1.41497 | E11.5 * Sox10 up vs E11.5 * Ctrl |
| 10476814 Insm1         | NM_016889    | 0.0031817    | 1.41455 | E11.5 * Sox10 up vs E11.5 * Ctrl |
| 10450226 Ppt2          | NM_019441    | 0.0064722    | 1.41433 | E11.5 * Sox10 up vs E11.5 * Ctrl |
| 10534102 Gusb          | NM_010368    | 0.000486402  | 1.41379 | E11.5 * Sox10 up vs E11.5 * Ctrl |
| 10562360 Gpi1          | NM_008155    | 0.000123225  | 1.41375 | E11.5 * Sox10 up vs E11.5 * Ctrl |
| 10410124 Ctsl          | NM_009984    | 4.00827e-007 | 1.41363 | E11.5 * Sox10 up vs E11.5 * Ctrl |
| 10585905 Parp6         | NM_029922    | 1.48643e-005 | 1.41361 | E11.5 * Sox10 up vs E11.5 * Ctrl |
| 10566730 Stk33         | ENSMUST00000 | 0.00049403   | 1.41337 | E11.5 * Sox10 up vs E11.5 * Ctrl |
| 10492890 Lrba          | NM_030695    | 1.50469e-005 | 1.41298 | E11.5 * Sox10 up vs E11.5 * Ctrl |
| 10482109 Rbm18         | NR_027515    | 1.20548e-005 | 1.41272 | E11.5 * Sox10 up vs E11.5 * Ctrl |
| 10361007 Smyd2         | NM_026796    | 1.08697e-006 | 1.41246 | E11.5 * Sox10 up vs E11.5 * Ctrl |
| 10542757 Stk38l        | NM_172734    | 0.004948     | 1.41232 | E11.5 * Sox10 up vs E11.5 * Ctrl |
| 10569181 Lrdd          | NM_022654    | 0.000248683  | 1.41099 | E11.5 * Sox10 up vs E11.5 * Ctrl |
| 10384145 H2afv         | BC028539     | 0.000410796  | 1.41087 | E11.5 * Sox10 up vs E11.5 * Ctrl |
| 10549097 Ldhd          | NM_008492    | 2.81538e-007 | 1.41071 | E11.5 * Sox10 up vs E11.5 * Ctrl |
| 10510687 Acot7         | NM_133348    | 0.00015301   | 1.41063 | E11.5 * Sox10 up vs E11.5 * Ctrl |
| 10478772 Arfgef2       | NM_001085495 | 1.62141e-005 | 1.41018 | E11.5 * Sox10 up vs E11.5 * Ctrl |
| 10596053 Pccb          | NM_025835    | 0.00227003   | 1.4092  | E11.5 * Sox10 up vs E11.5 * Ctrl |
| 10399636 Mrto4         | NM_023536    | 3.28356e-005 | 1.40911 | E11.5 * Sox10 up vs E11.5 * Ctrl |
| 10548745 Gpr19         | NM_008157    | 0.000299781  | 1.40896 | E11.5 * Sox10 up vs E11.5 * Ctrl |
| 10474073 C230071H18Rik | BC147668     | 0.000211031  | 1.40836 | E11.5 * Sox10 up vs E11.5 * Ctrl |
| 10434577 Vps8          | NM_001081366 | 1.00218e-008 | 1.40832 | E11.5 * Sox10 up vs E11.5 * Ctrl |
| 10527148 Slc29a4       | NM_146257    | 1.12758e-005 | 1.40817 | E11.5 * Sox10 up vs E11.5 * Ctrl |
| 10353117 Slco5a1       | NM_172841    | 0.00019076   | 1.40795 | E11.5 * Sox10 up vs E11.5 * Ctrl |
| 10390283 Cdk5rap3      | NM_030248    | 0.000814447  | 1.40794 | E11.5 * Sox10 up vs E11.5 * Ctrl |
| 10571705 Irf2          | NM_008391    | 0.00109828   | 1.40731 | E11.5 * Sox10 up vs E11.5 * Ctrl |
| 10433672 Rrn3          | NM_001039521 | 4.76946e-006 | 1.40729 | E11.5 * Sox10 up vs E11.5 * Ctrl |

|                        |                     |              |         |                                  |
|------------------------|---------------------|--------------|---------|----------------------------------|
| 10473737 Mtch2         | NM_019758           | 1.24142e-005 | 1.40665 | E11.5 * Sox10 up vs E11.5 * Ctrl |
| 10373113 Kif5a         | NM_008447           | 0.003219     | 1.40637 | E11.5 * Sox10 up vs E11.5 * Ctrl |
| 10599232 Nkap          | NM_025937           | 0.00187744   | 1.40635 | E11.5 * Sox10 up vs E11.5 * Ctrl |
| 10433971 Rimbpb3       | NM_001033338        | 0.0011075    | 1.40627 | E11.5 * Sox10 up vs E11.5 * Ctrl |
| 10387111 2310004I24Rik | NM_025510           | 0.000243582  | 1.40611 | E11.5 * Sox10 up vs E11.5 * Ctrl |
| 10486469 Vps39         | NM_147153           | 4.49623e-005 | 1.40599 | E11.5 * Sox10 up vs E11.5 * Ctrl |
| 10601701 Tmem35        | NM_026239           | 0.000498155  | 1.40578 | E11.5 * Sox10 up vs E11.5 * Ctrl |
| 10578916 Sc4mol        | NM_025436           | 0.00136561   | 1.40577 | E11.5 * Sox10 up vs E11.5 * Ctrl |
| 10536216 Gng11         | NM_025331           | 0.0011621    | 1.40532 | E11.5 * Sox10 up vs E11.5 * Ctrl |
| 10535273 Gna12         | NM_010302           | 0.000822972  | 1.40527 | E11.5 * Sox10 up vs E11.5 * Ctrl |
| 10406941 Sgtb          | NM_144838           | 0.00615208   | 1.40511 | E11.5 * Sox10 up vs E11.5 * Ctrl |
| 10404928 C78339        | NM_001033192        | 1.58694e-006 | 1.40445 | E11.5 * Sox10 up vs E11.5 * Ctrl |
| 10447490 Pja2          | NM_001025309        | 3.7346e-007  | 1.40443 | E11.5 * Sox10 up vs E11.5 * Ctrl |
| 10398972 Mta1          | NM_054081           | 0.000785374  | 1.4041  | E11.5 * Sox10 up vs E11.5 * Ctrl |
| 10558723 Psmc13        | NM_011875           | 0.00108451   | 1.40336 | E11.5 * Sox10 up vs E11.5 * Ctrl |
| 10501121 Fam40a        | NM_153563           | 0.000149426  | 1.40335 | E11.5 * Sox10 up vs E11.5 * Ctrl |
| 10377215 Gas7          | NM_008088           | 6.08289e-006 | 1.40311 | E11.5 * Sox10 up vs E11.5 * Ctrl |
| 10557705 Phkg2         | NM_026888           | 3.42984e-005 | 1.40302 | E11.5 * Sox10 up vs E11.5 * Ctrl |
| 10468990 Parl          | NM_001005767        | 0.001023     | 1.40283 | E11.5 * Sox10 up vs E11.5 * Ctrl |
| 10376017 ENSMUSG00000  | ENSMUST00000        | 0.00897854   | 1.40277 | E11.5 * Sox10 up vs E11.5 * Ctrl |
| 10530319 Atp8a1        | NM_001038999        | 3.48462e-007 | 1.40261 | E11.5 * Sox10 up vs E11.5 * Ctrl |
| 10592336 Spa17         | NM_011449           | 0.00605198   | 1.40217 | E11.5 * Sox10 up vs E11.5 * Ctrl |
| 10487476 1500011K16Rik | ENSMUST00000        | 0.000510457  | 1.40209 | E11.5 * Sox10 up vs E11.5 * Ctrl |
| 10365729 Pctk2         | NM_146239           | 1.44955e-006 | 1.4019  | E11.5 * Sox10 up vs E11.5 * Ctrl |
| 10563602 Saa4          | NM_011316           | 0.000543894  | 1.40187 | E11.5 * Sox10 up vs E11.5 * Ctrl |
| 10481830 Zbtb43        | NM_027947           | 0.00206075   | 1.40161 | E11.5 * Sox10 up vs E11.5 * Ctrl |
| 10392347 Pitpnc1       | NM_145823           | 1.87257e-006 | 1.40128 | E11.5 * Sox10 up vs E11.5 * Ctrl |
| 10430748 Rangap1       | NM_011241           | 0.00114229   | 1.40114 | E11.5 * Sox10 up vs E11.5 * Ctrl |
| 10602401 Fgd1          | NM_008001           | 0.000136023  | 1.40113 | E11.5 * Sox10 up vs E11.5 * Ctrl |
| 10557420 Tufm          | NM_172745           | 0.00493656   | 1.40079 | E11.5 * Sox10 up vs E11.5 * Ctrl |
| 10376019 OTTMUSG00000  | XM_621250           | 0.0094222    | 1.40035 | E11.5 * Sox10 up vs E11.5 * Ctrl |
| 10462587 Stambpl1      | NM_029682           | 0.00457835   | 1.39985 | E11.5 * Sox10 up vs E11.5 * Ctrl |
| 10475247 Tmem62        | NM_175285           | 0.00919512   | 1.3995  | E11.5 * Sox10 up vs E11.5 * Ctrl |
| 10360580 Tfb2m         | NM_008249           | 7.50536e-005 | 1.39908 | E11.5 * Sox10 up vs E11.5 * Ctrl |
| 10472095 Bloc1s2       | BC065806            | 0.000347451  | 1.39889 | E11.5 * Sox10 up vs E11.5 * Ctrl |
| 10571214 Rnf122        | NM_175136           | 0.00129446   | 1.39873 | E11.5 * Sox10 up vs E11.5 * Ctrl |
| 10407222 Dhx29         | NM_172594           | 7.0424e-005  | 1.39856 | E11.5 * Sox10 up vs E11.5 * Ctrl |
| 10507203 Atpaf1        | NM_181040           | 0.000326596  | 1.3985  | E11.5 * Sox10 up vs E11.5 * Ctrl |
| 10581625 2400003C14Rik | BC039052            | 0.000152295  | 1.39847 | E11.5 * Sox10 up vs E11.5 * Ctrl |
| 10344895 EG665262      | XR_032183           | 0.000135117  | 1.39836 | E11.5 * Sox10 up vs E11.5 * Ctrl |
| 10537157 2310005E10Rik | NM_172398           | 5.16895e-005 | 1.39816 | E11.5 * Sox10 up vs E11.5 * Ctrl |
| 10364455 Cdc34         | NM_177613           | 0.000552395  | 1.39745 | E11.5 * Sox10 up vs E11.5 * Ctrl |
| 10510254 Fv1           | NM_010244           | 0.00119931   | 1.39731 | E11.5 * Sox10 up vs E11.5 * Ctrl |
| 10599562 1100001E04Rik | NM_001081123        | 0.0014661    | 1.39713 | E11.5 * Sox10 up vs E11.5 * Ctrl |
| 10558948 Cd151         | NM_009842           | 0.00232486   | 1.39663 | E11.5 * Sox10 up vs E11.5 * Ctrl |
| 10412909 Fdft1         | NM_010191           | 0.00139791   | 1.39647 | E11.5 * Sox10 up vs E11.5 * Ctrl |
| 10371319 ENSMUSG00000  | ENSMUST00000        | 0.00879094   | 1.39631 | E11.5 * Sox10 up vs E11.5 * Ctrl |
| 10476893 Gzf1          | NM_028986           | 0.00356606   | 1.39606 | E11.5 * Sox10 up vs E11.5 * Ctrl |
| 10442691 Clcn7         | NM_011930           | 0.0047274    | 1.39565 | E11.5 * Sox10 up vs E11.5 * Ctrl |
| 10423293 Myo10         | NM_019472           | 0.000364893  | 1.39551 | E11.5 * Sox10 up vs E11.5 * Ctrl |
| 10382912               | 09-Sep NM_001113486 | 3.03696e-005 | 1.3954  | E11.5 * Sox10 up vs E11.5 * Ctrl |
| 10533869 Ccdc92        | NM_144819           | 0.000902999  | 1.39536 | E11.5 * Sox10 up vs E11.5 * Ctrl |
| 10396064 Txndc9        | NM_172054           | 0.000154678  | 1.39511 | E11.5 * Sox10 up vs E11.5 * Ctrl |
| 10364293 Ube2g2        | NM_019803           | 0.00339641   | 1.3947  | E11.5 * Sox10 up vs E11.5 * Ctrl |
| 10544148 Jhdm1d        | NM_001033430        | 0.0011516    | 1.39464 | E11.5 * Sox10 up vs E11.5 * Ctrl |
| 10398936 Pacs2         | NM_001081170        | 0.000757398  | 1.39459 | E11.5 * Sox10 up vs E11.5 * Ctrl |
| 10554233 Aen           | NM_026531           | 0.00573986   | 1.39449 | E11.5 * Sox10 up vs E11.5 * Ctrl |
| 10371396 Mterfd3       | NM_028832           | 0.00977121   | 1.39429 | E11.5 * Sox10 up vs E11.5 * Ctrl |
| 10362922 Atg5          | NM_053069           | 6.36363e-005 | 1.39411 | E11.5 * Sox10 up vs E11.5 * Ctrl |
| 10463704 As3mt         | NM_020577           | 9.93546e-006 | 1.39402 | E11.5 * Sox10 up vs E11.5 * Ctrl |
| 10408168 Abt1          | NM_013924           | 0.000946353  | 1.39391 | E11.5 * Sox10 up vs E11.5 * Ctrl |
| 10373702 Pisd-ps1      | NR_003517           | 0.00561797   | 1.39379 | E11.5 * Sox10 up vs E11.5 * Ctrl |
| 10555205 Gdpd5         | NM_201352           | 0.0012198    | 1.39372 | E11.5 * Sox10 up vs E11.5 * Ctrl |
| 10400165 Tfb2m         | NM_008249           | 0.000141809  | 1.39343 | E11.5 * Sox10 up vs E11.5 * Ctrl |
| 10549552 Prpf31        | NM_027328           | 0.000143187  | 1.39318 | E11.5 * Sox10 up vs E11.5 * Ctrl |
| 10527133 Wipi2         | NM_178398           | 0.000338247  | 1.39282 | E11.5 * Sox10 up vs E11.5 * Ctrl |

|          |               |               |              |         |                                  |
|----------|---------------|---------------|--------------|---------|----------------------------------|
| 10543697 | Zc3hc1        | NM_172735     | 0.00255028   | 1.39251 | E11.5 * Sox10 up vs E11.5 * Ctrl |
| 10429908 | Bop1          | NM_013481     | 0.00058764   | 1.39246 | E11.5 * Sox10 up vs E11.5 * Ctrl |
| 10393926 | Dcxr          | NM_026428     | 0.00110838   | 1.39222 | E11.5 * Sox10 up vs E11.5 * Ctrl |
| 10404531 | Psmg4         | NM_001101430  | 0.00195466   | 1.3919  | E11.5 * Sox10 up vs E11.5 * Ctrl |
| 10453887 | Cables1       | NM_001146287  | 4.0518e-005  | 1.39181 | E11.5 * Sox10 up vs E11.5 * Ctrl |
| 10602474 | Phf8          | NM_001113354  | 0.00136289   | 1.39167 | E11.5 * Sox10 up vs E11.5 * Ctrl |
| 10582262 | Klhdc4        | NM_145605     | 0.00494463   | 1.39122 | E11.5 * Sox10 up vs E11.5 * Ctrl |
| 10587627 | Cyb5r4        | NM_024195     | 4.13907e-005 | 1.39096 | E11.5 * Sox10 up vs E11.5 * Ctrl |
| 10452918 | Strn          | NM_011500     | 1.69442e-005 | 1.39095 | E11.5 * Sox10 up vs E11.5 * Ctrl |
| 10437174 | Wrb           | NM_207301     | 0.00150838   | 1.39079 | E11.5 * Sox10 up vs E11.5 * Ctrl |
| 10565910 | Plekhhb1      | NM_013746     | 0.0030448    | 1.39036 | E11.5 * Sox10 up vs E11.5 * Ctrl |
| 10365601 | Gnptab        | NM_001004164  | 3.8104e-005  | 1.3903  | E11.5 * Sox10 up vs E11.5 * Ctrl |
| 10434384 | Ap2m1         | NM_009679     | 0.0036249    | 1.38962 | E11.5 * Sox10 up vs E11.5 * Ctrl |
| 10579554 | Unc13a        | NM_001029873  | 0.000224457  | 1.38883 | E11.5 * Sox10 up vs E11.5 * Ctrl |
| 10540085 | Fbln2         | NM_007992     | 0.00138515   | 1.38879 | E11.5 * Sox10 up vs E11.5 * Ctrl |
| 10380381 | Tob1          | NM_009427     | 0.000548845  | 1.38874 | E11.5 * Sox10 up vs E11.5 * Ctrl |
| 10578984 | Tufm          | NM_172745     | 0.00413671   | 1.38872 | E11.5 * Sox10 up vs E11.5 * Ctrl |
| 10372668 | Mdm2          | NM_010786     | 3.62861e-005 | 1.38864 | E11.5 * Sox10 up vs E11.5 * Ctrl |
| 10581737 | Ddx19b        | NM_172284     | 0.000256178  | 1.38819 | E11.5 * Sox10 up vs E11.5 * Ctrl |
| 10384961 | Stc2          | NM_011491     | 0.00320334   | 1.38815 | E11.5 * Sox10 up vs E11.5 * Ctrl |
| 10460573 | Eif1ad        | NM_027236     | 3.73756e-005 | 1.38793 | E11.5 * Sox10 up vs E11.5 * Ctrl |
| 10394791 | LOC236260     | ENSMUST000001 | 0.00795087   | 1.38785 | E11.5 * Sox10 up vs E11.5 * Ctrl |
| 10399379 | Pgk1          | NM_008828     | 3.8192e-009  | 1.38773 | E11.5 * Sox10 up vs E11.5 * Ctrl |
| 10498313 | Pgk1          | NM_008828     | 3.8192e-009  | 1.38773 | E11.5 * Sox10 up vs E11.5 * Ctrl |
| 10415980 | Fbxo16        | NM_015795     | 0.000684385  | 1.38731 | E11.5 * Sox10 up vs E11.5 * Ctrl |
| 10472989 | Hoxd1         | NM_010467     | 0.00719797   | 1.38722 | E11.5 * Sox10 up vs E11.5 * Ctrl |
| 10372497 | Thap2         | NM_025780     | 0.00362288   | 1.38716 | E11.5 * Sox10 up vs E11.5 * Ctrl |
| 10573566 | Dhps          | NM_001039514  | 7.60487e-006 | 1.38696 | E11.5 * Sox10 up vs E11.5 * Ctrl |
| 10529041 | Preb          | NM_016703     | 0.00301445   | 1.38677 | E11.5 * Sox10 up vs E11.5 * Ctrl |
| 10571907 | Mfap3l        | NM_027756     | 0.000394153  | 1.38671 | E11.5 * Sox10 up vs E11.5 * Ctrl |
| 10501244 | Ampd2         | NM_028779     | 0.000372659  | 1.38656 | E11.5 * Sox10 up vs E11.5 * Ctrl |
| 10529549 | Tbc1d14       | NM_001113362  | 3.45184e-005 | 1.38632 | E11.5 * Sox10 up vs E11.5 * Ctrl |
| 10456836 | St8sia5       | NM_153124     | 0.000320282  | 1.38575 | E11.5 * Sox10 up vs E11.5 * Ctrl |
| 10425293 | Cby1          | NM_028634     | 1.01138e-005 | 1.38574 | E11.5 * Sox10 up vs E11.5 * Ctrl |
| 10395538 | Pnpla8        | NM_026164     | 1.10266e-005 | 1.3854  | E11.5 * Sox10 up vs E11.5 * Ctrl |
| 10386604 | Shmt1         | NM_009171     | 0.00109611   | 1.38536 | E11.5 * Sox10 up vs E11.5 * Ctrl |
| 10381697 | Hexim1        | NM_138753     | 3.96301e-005 | 1.38525 | E11.5 * Sox10 up vs E11.5 * Ctrl |
| 10432362 | Rheb1         | NM_026967     | 0.00684605   | 1.3851  | E11.5 * Sox10 up vs E11.5 * Ctrl |
| 10446739 | Clip4         | NM_030179     | 0.000701851  | 1.38498 | E11.5 * Sox10 up vs E11.5 * Ctrl |
| 10522250 | Tmem33        | NM_028975     | 3.87862e-005 | 1.38388 | E11.5 * Sox10 up vs E11.5 * Ctrl |
| 10472136 | Galnt13       | NM_173030     | 0.00194691   | 1.38349 | E11.5 * Sox10 up vs E11.5 * Ctrl |
| 10457536 | Ankrd29       | ENSMUST000001 | 0.000675122  | 1.38333 | E11.5 * Sox10 up vs E11.5 * Ctrl |
| 10361799 | Adat2         | NM_025748     | 0.000336034  | 1.38328 | E11.5 * Sox10 up vs E11.5 * Ctrl |
| 10376033 | Kif3a         | NM_008443     | 5.79022e-007 | 1.38315 | E11.5 * Sox10 up vs E11.5 * Ctrl |
| 10533929 | Scarb1        | NM_016741     | 0.00245063   | 1.38315 | E11.5 * Sox10 up vs E11.5 * Ctrl |
| 10577508 | Ckap2         | NM_001004140  | 0.000533795  | 1.38286 | E11.5 * Sox10 up vs E11.5 * Ctrl |
| 10529344 | Poln          | NM_181857     | 1.94594e-005 | 1.38279 | E11.5 * Sox10 up vs E11.5 * Ctrl |
| 10576844 | BC068157      | NM_207203     | 0.000425252  | 1.38264 | E11.5 * Sox10 up vs E11.5 * Ctrl |
| 10480672 | Ssna1         | NM_023464     | 0.00488397   | 1.38216 | E11.5 * Sox10 up vs E11.5 * Ctrl |
| 10593205 | Oxo2          | NM_024233     | 4.43103e-006 | 1.38193 | E11.5 * Sox10 up vs E11.5 * Ctrl |
| 10510176 | OTTMUSG000001 | NM_001039233  | 0.000157978  | 1.38189 | E11.5 * Sox10 up vs E11.5 * Ctrl |
| 10378649 | Slc43a2       | NM_173388     | 0.000353792  | 1.38148 | E11.5 * Sox10 up vs E11.5 * Ctrl |
| 10402715 | Bag5          | NM_027404     | 2.8775e-005  | 1.38133 | E11.5 * Sox10 up vs E11.5 * Ctrl |
| 10398727 | Klc1          | NM_001025360  | 0.000580816  | 1.38087 | E11.5 * Sox10 up vs E11.5 * Ctrl |
| 10362490 | Tspyl4        | NM_030203     | 0.000253101  | 1.38074 | E11.5 * Sox10 up vs E11.5 * Ctrl |
| 10529689 | Wdr1          | NM_011715     | 0.000282368  | 1.38068 | E11.5 * Sox10 up vs E11.5 * Ctrl |
| 10428407 | Tmem74        | NM_175502     | 0.0015381    | 1.38065 | E11.5 * Sox10 up vs E11.5 * Ctrl |
| 10571344 | D8Ertd82e     | NM_172911     | 0.000615139  | 1.38065 | E11.5 * Sox10 up vs E11.5 * Ctrl |
| 10476702 | Sec23b        | NM_019787     | 2.06468e-006 | 1.38061 | E11.5 * Sox10 up vs E11.5 * Ctrl |
| 10409222 | Shc3          | NM_009167     | 0.000295977  | 1.38041 | E11.5 * Sox10 up vs E11.5 * Ctrl |
| 10359235 | Rasal2        | NM_177644     | 9.99881e-007 | 1.38032 | E11.5 * Sox10 up vs E11.5 * Ctrl |
| 10358662 | Hmcn1         | NM_001024720  | 0.000386347  | 1.38017 | E11.5 * Sox10 up vs E11.5 * Ctrl |
| 10540911 | Tsen2         | NM_199033     | 0.000320067  | 1.38011 | E11.5 * Sox10 up vs E11.5 * Ctrl |
| 10555108 | Clns1a        | NM_023671     | 2.74943e-007 | 1.38001 | E11.5 * Sox10 up vs E11.5 * Ctrl |
| 10469020 | Bend7         | NM_178663     | 8.7455e-006  | 1.37948 | E11.5 * Sox10 up vs E11.5 * Ctrl |
| 10500683 | Rangrf        | NM_021329     | 0.00334102   | 1.37929 | E11.5 * Sox10 up vs E11.5 * Ctrl |

|          |               |               |              |         |                                  |
|----------|---------------|---------------|--------------|---------|----------------------------------|
| 10558248 | Bub3          | NM_009774     | 7.86213e-007 | 1.37922 | E11.5 * Sox10 up vs E11.5 * Ctrl |
| 10347232 | Xrcc5         | NM_009533     | 8.83854e-006 | 1.3791  | E11.5 * Sox10 up vs E11.5 * Ctrl |
| 10589004 | Qars          | NM_133794     | 3.14412e-005 | 1.37896 | E11.5 * Sox10 up vs E11.5 * Ctrl |
| 10369630 | Ddx21         | NM_019553     | 9.67438e-005 | 1.37886 | E11.5 * Sox10 up vs E11.5 * Ctrl |
| 10474977 | 1500003O03Rik | NM_019769     | 1.54473e-005 | 1.37885 | E11.5 * Sox10 up vs E11.5 * Ctrl |
| 10569890 | Aida          | NM_181732     | 0.000796587  | 1.3788  | E11.5 * Sox10 up vs E11.5 * Ctrl |
| 10460108 | Gnpnat1       | NM_019425     | 0.000338721  | 1.37869 | E11.5 * Sox10 up vs E11.5 * Ctrl |
| 10499438 | Msto1         | NM_144898     | 0.00629068   | 1.37868 | E11.5 * Sox10 up vs E11.5 * Ctrl |
| 10403076 | ---           | ---           | 0.000119784  | 1.37834 | E11.5 * Sox10 up vs E11.5 * Ctrl |
| 10506269 | Ak3l1         | NM_009647     | 0.00144181   | 1.37829 | E11.5 * Sox10 up vs E11.5 * Ctrl |
| 10512291 | Dctn3         | NM_016890     | 1.79991e-005 | 1.37818 | E11.5 * Sox10 up vs E11.5 * Ctrl |
| 10426093 | Zbed4         | NM_181412     | 1.46915e-005 | 1.37804 | E11.5 * Sox10 up vs E11.5 * Ctrl |
| 10450622 | 2610110G12Rik | NM_001142744  | 0.00637825   | 1.37796 | E11.5 * Sox10 up vs E11.5 * Ctrl |
| 10581266 | Tppp3         | NM_026481     | 0.000445452  | 1.37795 | E11.5 * Sox10 up vs E11.5 * Ctrl |
| 10470322 | Surf2         | NM_013678     | 9.42111e-006 | 1.37791 | E11.5 * Sox10 up vs E11.5 * Ctrl |
| 10416640 | Mtrf1         | NM_145960     | 0.00145464   | 1.37762 | E11.5 * Sox10 up vs E11.5 * Ctrl |
| 10358629 | Hmcn1         | NM_001024720  | 0.00632728   | 1.37744 | E11.5 * Sox10 up vs E11.5 * Ctrl |
| 10373571 | 1110012D08Rik | BC037624      | 0.00113308   | 1.37737 | E11.5 * Sox10 up vs E11.5 * Ctrl |
| 10505894 | Mtap          | NM_024433     | 2.90134e-005 | 1.37732 | E11.5 * Sox10 up vs E11.5 * Ctrl |
| 10353899 | Sema4c        | NM_001126047  | 0.000668683  | 1.37722 | E11.5 * Sox10 up vs E11.5 * Ctrl |
| 10496417 | Rg9mtd2       | NM_175389     | 0.000553556  | 1.37714 | E11.5 * Sox10 up vs E11.5 * Ctrl |
| 10439218 | Pdia5         | NM_028295     | 5.97103e-006 | 1.37702 | E11.5 * Sox10 up vs E11.5 * Ctrl |
| 10417787 | Gng2          | NM_010315     | 1.30293e-005 | 1.37679 | E11.5 * Sox10 up vs E11.5 * Ctrl |
| 10488687 | Pdrg1         | NM_178939     | 6.7129e-005  | 1.37636 | E11.5 * Sox10 up vs E11.5 * Ctrl |
| 10528038 | Adam22        | NM_001007220  | 0.000104676  | 1.37618 | E11.5 * Sox10 up vs E11.5 * Ctrl |
| 10557156 | Plk1          | NM_011121     | 0.000545892  | 1.37582 | E11.5 * Sox10 up vs E11.5 * Ctrl |
| 10399430 | Ddx1          | NM_134040     | 2.2081e-007  | 1.37559 | E11.5 * Sox10 up vs E11.5 * Ctrl |
| 10583942 | Thyn1         | NM_144543     | 4.0882e-006  | 1.37546 | E11.5 * Sox10 up vs E11.5 * Ctrl |
| 10370471 | Agpat3        | NM_053014     | 6.99502e-006 | 1.37519 | E11.5 * Sox10 up vs E11.5 * Ctrl |
| 10445338 | Enpp5         | NM_032003     | 0.00137384   | 1.37487 | E11.5 * Sox10 up vs E11.5 * Ctrl |
| 10368918 | Sobp          | NM_175407     | 5.87447e-005 | 1.37477 | E11.5 * Sox10 up vs E11.5 * Ctrl |
| 10580469 | Cbln1         | NM_019626     | 0.00115279   | 1.37461 | E11.5 * Sox10 up vs E11.5 * Ctrl |
| 10459241 | Afap111       | NM_178928     | 0.000203603  | 1.37444 | E11.5 * Sox10 up vs E11.5 * Ctrl |
| 10404941 | Aof1          | NM_172262     | 0.000339661  | 1.37421 | E11.5 * Sox10 up vs E11.5 * Ctrl |
| 10416899 | Ndfip2        | NM_029561     | 9.09111e-005 | 1.37419 | E11.5 * Sox10 up vs E11.5 * Ctrl |
| 10529656 | Nsg1          | NM_010942     | 5.09181e-005 | 1.37408 | E11.5 * Sox10 up vs E11.5 * Ctrl |
| 10397450 | Vash1         | NM_177354     | 0.00045447   | 1.37403 | E11.5 * Sox10 up vs E11.5 * Ctrl |
| 10402318 | Prima1        | NM_133364     | 0.00717224   | 1.37384 | E11.5 * Sox10 up vs E11.5 * Ctrl |
| 10416510 | Nufip1        | NM_013745     | 0.000313832  | 1.37337 | E11.5 * Sox10 up vs E11.5 * Ctrl |
| 10544462 | Fam115a       | NM_029930     | 0.000199738  | 1.37328 | E11.5 * Sox10 up vs E11.5 * Ctrl |
| 10516051 | Cap1          | NM_007598     | 0.0102638    | 1.37322 | E11.5 * Sox10 up vs E11.5 * Ctrl |
| 10519693 | Sema3d        | NM_028882     | 0.00876897   | 1.37292 | E11.5 * Sox10 up vs E11.5 * Ctrl |
| 10492522 | Schip1        | NM_001113421  | 0.000113541  | 1.37224 | E11.5 * Sox10 up vs E11.5 * Ctrl |
| 10369885 | Cisd1         | NM_134007     | 0.00363913   | 1.37217 | E11.5 * Sox10 up vs E11.5 * Ctrl |
| 10517706 | Mrto4         | NM_023536     | 1.33998e-005 | 1.37203 | E11.5 * Sox10 up vs E11.5 * Ctrl |
| 10476005 | A730036l17Rik | ENSMUST000001 | 0.00217446   | 1.37165 | E11.5 * Sox10 up vs E11.5 * Ctrl |
| 10345357 | Imp4          | NM_178601     | 0.00019277   | 1.37161 | E11.5 * Sox10 up vs E11.5 * Ctrl |
| 10560304 | Calm3         | NM_007590     | 0.000134387  | 1.37161 | E11.5 * Sox10 up vs E11.5 * Ctrl |
| 10564313 | Mphosph10     | NM_026483     | 0.000211413  | 1.37093 | E11.5 * Sox10 up vs E11.5 * Ctrl |
| 10456357 | Pmaip1        | NM_021451     | 0.00464721   | 1.37081 | E11.5 * Sox10 up vs E11.5 * Ctrl |
| 10432256 | Arf3          | NM_007478     | 0.000125741  | 1.37052 | E11.5 * Sox10 up vs E11.5 * Ctrl |
| 10383556 | Fn3krp        | NM_181420     | 0.00630525   | 1.37022 | E11.5 * Sox10 up vs E11.5 * Ctrl |
| 10529957 | Gpr125        | ENSMUST000001 | 4.52247e-005 | 1.36989 | E11.5 * Sox10 up vs E11.5 * Ctrl |
| 10581560 | Psmd7         | NM_010817     | 1.0204e-005  | 1.36949 | E11.5 * Sox10 up vs E11.5 * Ctrl |
| 10553163 | Nomo1         | NM_153057     | 0.000745038  | 1.36915 | E11.5 * Sox10 up vs E11.5 * Ctrl |
| 10485830 | Tmem85        | NM_026519     | 0.000939589  | 1.36912 | E11.5 * Sox10 up vs E11.5 * Ctrl |
| 10504743 | Nans          | NM_053179     | 0.000656396  | 1.36887 | E11.5 * Sox10 up vs E11.5 * Ctrl |
| 10585699 | Fabp5         | NM_010634     | 2.12097e-005 | 1.36836 | E11.5 * Sox10 up vs E11.5 * Ctrl |
| 10375730 | ---           | ---           | 0.00319936   | 1.368   | E11.5 * Sox10 up vs E11.5 * Ctrl |
| 10467230 | Ide           | NM_031156     | 0.000247816  | 1.36769 | E11.5 * Sox10 up vs E11.5 * Ctrl |
| 10585417 | Idh3a         | NM_029573     | 0.00103709   | 1.36768 | E11.5 * Sox10 up vs E11.5 * Ctrl |
| 10545780 | Exoc6b        | NM_177077     | 3.5522e-005  | 1.36759 | E11.5 * Sox10 up vs E11.5 * Ctrl |
| 10415021 | Abhd4         | NM_134076     | 8.65387e-005 | 1.36743 | E11.5 * Sox10 up vs E11.5 * Ctrl |
| 10367582 | Vip           | NM_011702     | 0.00927614   | 1.36729 | E11.5 * Sox10 up vs E11.5 * Ctrl |
| 10531290 | Rchy1         | NM_026557     | 0.00593932   | 1.36713 | E11.5 * Sox10 up vs E11.5 * Ctrl |
| 10454735 | Fam53c        | BC057111      | 0.00326934   | 1.36644 | E11.5 * Sox10 up vs E11.5 * Ctrl |

|          |               |              |              |         |                                  |
|----------|---------------|--------------|--------------|---------|----------------------------------|
| 10523058 | Eif5a         | NM_181582    | 0.00189152   | 1.36621 | E11.5 * Sox10 up vs E11.5 * Ctrl |
| 10344624 | Lypla1        | NM_008866    | 0.000756039  | 1.36615 | E11.5 * Sox10 up vs E11.5 * Ctrl |
| 10485624 | Prrg4         | NM_178695    | 0.00209573   | 1.36604 | E11.5 * Sox10 up vs E11.5 * Ctrl |
| 10510286 | Mad2l2        | NM_027985    | 0.000189889  | 1.3658  | E11.5 * Sox10 up vs E11.5 * Ctrl |
| 10528546 | Gabarapl2     | NM_026693    | 0.000143336  | 1.36579 | E11.5 * Sox10 up vs E11.5 * Ctrl |
| 10559261 | Cd81          | NM_133655    | 6.63135e-006 | 1.36575 | E11.5 * Sox10 up vs E11.5 * Ctrl |
| 10534456 | Hip1          | NM_146001    | 0.000765562  | 1.36546 | E11.5 * Sox10 up vs E11.5 * Ctrl |
| 10345025 | Iars          | NM_172015    | 0.000784129  | 1.36507 | E11.5 * Sox10 up vs E11.5 * Ctrl |
| 10548163 | Tulp3         | NM_011657    | 0.000282779  | 1.36496 | E11.5 * Sox10 up vs E11.5 * Ctrl |
| 10375485 | ---           | ---          | 3.57885e-005 | 1.36352 | E11.5 * Sox10 up vs E11.5 * Ctrl |
| 10515943 | Ctps          | NM_016748    | 3.0215e-005  | 1.36347 | E11.5 * Sox10 up vs E11.5 * Ctrl |
| 10467749 | Crtac1        | NM_145123    | 1.4183e-005  | 1.36339 | E11.5 * Sox10 up vs E11.5 * Ctrl |
| 10576305 | Tcf25         | NM_001037878 | 5.79537e-005 | 1.36329 | E11.5 * Sox10 up vs E11.5 * Ctrl |
| 10438517 | Alg3          | NM_145939    | 8.70976e-005 | 1.36292 | E11.5 * Sox10 up vs E11.5 * Ctrl |
| 10517328 | Tmem50a       | NM_027935    | 8.09757e-007 | 1.36288 | E11.5 * Sox10 up vs E11.5 * Ctrl |
| 10535852 | Slc7a1        | NM_007513    | 0.000254945  | 1.3628  | E11.5 * Sox10 up vs E11.5 * Ctrl |
| 10554588 | Sh3gl3        | NM_017400    | 0.00752172   | 1.36278 | E11.5 * Sox10 up vs E11.5 * Ctrl |
| 10544837 | 1200009O22Rik | BC043099     | 6.43228e-005 | 1.36268 | E11.5 * Sox10 up vs E11.5 * Ctrl |
| 10590983 | Panx1         | NM_019482    | 0.000242857  | 1.36267 | E11.5 * Sox10 up vs E11.5 * Ctrl |
| 10526853 | Fam20c        | NM_030565    | 0.00508475   | 1.36266 | E11.5 * Sox10 up vs E11.5 * Ctrl |
| 10562578 | Pop4          | NM_025390    | 0.000470373  | 1.36229 | E11.5 * Sox10 up vs E11.5 * Ctrl |
| 10489065 | Ndr3          | NM_013865    | 3.83866e-005 | 1.36161 | E11.5 * Sox10 up vs E11.5 * Ctrl |
| 10384691 | 0610010F05Rik | NM_027860    | 9.26106e-005 | 1.36119 | E11.5 * Sox10 up vs E11.5 * Ctrl |
| 10392856 | Nat9          | NM_025400    | 0.00507826   | 1.36113 | E11.5 * Sox10 up vs E11.5 * Ctrl |
| 10425461 | Adsl          | NM_009634    | 1.24255e-005 | 1.36088 | E11.5 * Sox10 up vs E11.5 * Ctrl |
| 10556528 | Pde3b         | NM_011055    | 0.00059195   | 1.36082 | E11.5 * Sox10 up vs E11.5 * Ctrl |
| 10406067 | Clptm1l       | NM_146047    | 0.00260084   | 1.36068 | E11.5 * Sox10 up vs E11.5 * Ctrl |
| 10555550 | Clpb          | NM_009191    | 9.41349e-006 | 1.36062 | E11.5 * Sox10 up vs E11.5 * Ctrl |
| 10549057 | Recql         | NM_023042    | 0.000444     | 1.36037 | E11.5 * Sox10 up vs E11.5 * Ctrl |
| 10491551 | Exosc9        | NM_019393    | 0.000437048  | 1.35995 | E11.5 * Sox10 up vs E11.5 * Ctrl |
| 10528507 | Pus7          | NM_178403    | 8.56929e-005 | 1.35973 | E11.5 * Sox10 up vs E11.5 * Ctrl |
| 10473097 | Plekha3       | NM_031256    | 0.0001757    | 1.35972 | E11.5 * Sox10 up vs E11.5 * Ctrl |
| 10476725 | Gm561         | NM_001033297 | 0.00894411   | 1.35946 | E11.5 * Sox10 up vs E11.5 * Ctrl |
| 10535184 | Psmg3         | NM_025604    | 0.00110653   | 1.35941 | E11.5 * Sox10 up vs E11.5 * Ctrl |
| 10445909 | Kat2b         | NM_020005    | 0.000112263  | 1.35916 | E11.5 * Sox10 up vs E11.5 * Ctrl |
| 10403765 | Vps41         | NM_172120    | 1.76638e-005 | 1.35895 | E11.5 * Sox10 up vs E11.5 * Ctrl |
| 10384398 | Grb10         | NM_010345    | 0.000109025  | 1.35877 | E11.5 * Sox10 up vs E11.5 * Ctrl |
| 10434629 | Map3k13       | NM_172821    | 0.00200212   | 1.35832 | E11.5 * Sox10 up vs E11.5 * Ctrl |
| 10494007 | Them4         | NM_029431    | 0.00421009   | 1.35822 | E11.5 * Sox10 up vs E11.5 * Ctrl |
| 10419049 | Nrg3          | NM_008734    | 0.00957154   | 1.35786 | E11.5 * Sox10 up vs E11.5 * Ctrl |
| 10491385 | Actl6a        | NM_019673    | 2.83729e-005 | 1.35771 | E11.5 * Sox10 up vs E11.5 * Ctrl |
| 10381260 | Tubg2         | NM_134028    | 0.000145434  | 1.35761 | E11.5 * Sox10 up vs E11.5 * Ctrl |
| 10355916 | Pax3          | NM_008781    | 4.39961e-005 | 1.35736 | E11.5 * Sox10 up vs E11.5 * Ctrl |
| 10433735 | Abcc1         | NM_008576    | 0.000384894  | 1.35706 | E11.5 * Sox10 up vs E11.5 * Ctrl |
| 10537102 | Exoc4         | NM_009148    | 5.59911e-005 | 1.35704 | E11.5 * Sox10 up vs E11.5 * Ctrl |
| 10463254 | D19Ertd386e   | NM_177464    | 7.72304e-005 | 1.35703 | E11.5 * Sox10 up vs E11.5 * Ctrl |
| 10401172 | Vti1b         | NM_016800    | 1.14719e-006 | 1.35699 | E11.5 * Sox10 up vs E11.5 * Ctrl |
| 10409737 | Agtbbp1       | NM_023328    | 3.0879e-005  | 1.35686 | E11.5 * Sox10 up vs E11.5 * Ctrl |
| 10419170 | Txndc16       | NM_172597    | 0.00353088   | 1.35641 | E11.5 * Sox10 up vs E11.5 * Ctrl |
| 10458906 | Ppic          | NM_008908    | 4.64428e-007 | 1.35611 | E11.5 * Sox10 up vs E11.5 * Ctrl |
| 10374119 | Ogdh          | NM_010956    | 0.00122067   | 1.35602 | E11.5 * Sox10 up vs E11.5 * Ctrl |
| 10368484 | ENSMUSG00000  | ENSMUST00000 | 0.000183766  | 1.35548 | E11.5 * Sox10 up vs E11.5 * Ctrl |
| 10400006 | Ahr           | NM_013464    | 0.000133361  | 1.35541 | E11.5 * Sox10 up vs E11.5 * Ctrl |
| 10394498 | Wdr35         | NM_172470    | 0.00064863   | 1.35528 | E11.5 * Sox10 up vs E11.5 * Ctrl |
| 10413461 | Erc2          | NM_177814    | 0.00347577   | 1.35504 | E11.5 * Sox10 up vs E11.5 * Ctrl |
| 10400395 | Ppp2r3c       | NM_021529    | 0.00932606   | 1.35453 | E11.5 * Sox10 up vs E11.5 * Ctrl |
| 10352242 | Parp1         | NM_007415    | 0.00030925   | 1.35443 | E11.5 * Sox10 up vs E11.5 * Ctrl |
| 10407742 | Actn2         | NM_033268    | 1.71918e-005 | 1.35422 | E11.5 * Sox10 up vs E11.5 * Ctrl |
| 10551881 | 0610010E21Rik | NM_001033140 | 0.000240859  | 1.35417 | E11.5 * Sox10 up vs E11.5 * Ctrl |
| 10527233 | Cyth3         | NM_011182    | 1.63308e-005 | 1.35399 | E11.5 * Sox10 up vs E11.5 * Ctrl |
| 10512640 | Gne           | NM_015828    | 5.104e-005   | 1.35372 | E11.5 * Sox10 up vs E11.5 * Ctrl |
| 10471535 | Fam129b       | NM_146119    | 0.000418943  | 1.35366 | E11.5 * Sox10 up vs E11.5 * Ctrl |
| 10514658 | Itgb3bp       | ENSMUST00000 | 2.1749e-005  | 1.35361 | E11.5 * Sox10 up vs E11.5 * Ctrl |
| 10428222 | Ncald         | NM_134094    | 0.000109465  | 1.35341 | E11.5 * Sox10 up vs E11.5 * Ctrl |
| 10478424 | Ywhab         | NM_018753    | 9.82161e-008 | 1.35337 | E11.5 * Sox10 up vs E11.5 * Ctrl |
| 10415844 | Ctsb          | NM_007798    | 0.000553983  | 1.35333 | E11.5 * Sox10 up vs E11.5 * Ctrl |

|                        |               |              |         |                                  |
|------------------------|---------------|--------------|---------|----------------------------------|
| 10457359 Mpp7          | NM_001081287  | 0.0016993    | 1.35328 | E11.5 * Sox10 up vs E11.5 * Ctrl |
| 10571384 Efha2         | ENSMUST000000 | 0.00120799   | 1.35299 | E11.5 * Sox10 up vs E11.5 * Ctrl |
| 10409365 Gprin1        | NM_012014     | 0.000113532  | 1.35287 | E11.5 * Sox10 up vs E11.5 * Ctrl |
| 10583788 Prkcsh        | NM_008925     | 0.00308679   | 1.35284 | E11.5 * Sox10 up vs E11.5 * Ctrl |
| 10561527 Actn4         | NM_021895     | 0.00196273   | 1.3526  | E11.5 * Sox10 up vs E11.5 * Ctrl |
| 10457546 Osbpl1a       | NM_207530     | 4.12206e-005 | 1.35223 | E11.5 * Sox10 up vs E11.5 * Ctrl |
| 10515396 9530048O09Rik | NR_024078     | 0.00829125   | 1.35213 | E11.5 * Sox10 up vs E11.5 * Ctrl |
| 10521440 Afap1         | NM_027373     | 0.000124668  | 1.3521  | E11.5 * Sox10 up vs E11.5 * Ctrl |
| 10530806 Ppat          | BC023841      | 1.37541e-006 | 1.35204 | E11.5 * Sox10 up vs E11.5 * Ctrl |
| 10386789 Ulk2          | NM_013881     | 5.60043e-007 | 1.35182 | E11.5 * Sox10 up vs E11.5 * Ctrl |
| 10555570 Phox2a        | NM_008887     | 0.0053049    | 1.35175 | E11.5 * Sox10 up vs E11.5 * Ctrl |
| 10437712 Zc3h7a        | NM_145931     | 0.000424368  | 1.35159 | E11.5 * Sox10 up vs E11.5 * Ctrl |
| 10583929 B3gat1        | NM_029792     | 0.00029928   | 1.35127 | E11.5 * Sox10 up vs E11.5 * Ctrl |
| 10428232 Rrm2b         | NM_199476     | 0.000101247  | 1.35026 | E11.5 * Sox10 up vs E11.5 * Ctrl |
| 10592850 Trappc4       | NM_021789     | 0.00186832   | 1.35023 | E11.5 * Sox10 up vs E11.5 * Ctrl |
| 10498837 Etfdh         | NM_025794     | 1.75392e-007 | 1.34992 | E11.5 * Sox10 up vs E11.5 * Ctrl |
| 10509163 Id3           | NM_008321     | 0.00290842   | 1.34977 | E11.5 * Sox10 up vs E11.5 * Ctrl |
| 10474112 Traf6         | NM_009424     | 0.000204495  | 1.34975 | E11.5 * Sox10 up vs E11.5 * Ctrl |
| 10530851 Mtch2         | NM_019758     | 0.00021913   | 1.34975 | E11.5 * Sox10 up vs E11.5 * Ctrl |
| 10517263 Fam54b        | BC026808      | 5.55715e-005 | 1.34953 | E11.5 * Sox10 up vs E11.5 * Ctrl |
| 10389391 OTTMUSG00000  | ENSMUST000000 | 0.00791638   | 1.34912 | E11.5 * Sox10 up vs E11.5 * Ctrl |
| 10400126 Lrrn3         | NM_010733     | 3.73471e-005 | 1.34899 | E11.5 * Sox10 up vs E11.5 * Ctrl |
| 10501649 Rtcd1         | NM_025517     | 1.86049e-007 | 1.34884 | E11.5 * Sox10 up vs E11.5 * Ctrl |
| 10464045 Acsf5         | NM_027976     | 0.000466376  | 1.34878 | E11.5 * Sox10 up vs E11.5 * Ctrl |
| 10555568 Rpl31         | BC092139      | 0.00911808   | 1.34877 | E11.5 * Sox10 up vs E11.5 * Ctrl |
| 10467842 Got1          | NM_010324     | 0.000106724  | 1.34846 | E11.5 * Sox10 up vs E11.5 * Ctrl |
| 10539653 Tprkb         | NM_176842     | 0.000569264  | 1.34812 | E11.5 * Sox10 up vs E11.5 * Ctrl |
| 10459835               | ---           | 0.00606291   | 1.34791 | E11.5 * Sox10 up vs E11.5 * Ctrl |
| 10428157 Rnf19a        | NM_013923     | 0.000104251  | 1.34777 | E11.5 * Sox10 up vs E11.5 * Ctrl |
| 10442396 Abca3         | NM_013855     | 4.37574e-005 | 1.34763 | E11.5 * Sox10 up vs E11.5 * Ctrl |
| 10363599 Rufy2         | NM_027425     | 0.000116502  | 1.34718 | E11.5 * Sox10 up vs E11.5 * Ctrl |
| 10436369 Filip1l       | NM_030163     | 3.26667e-006 | 1.34667 | E11.5 * Sox10 up vs E11.5 * Ctrl |
| 10498775 Golim4        | NM_175193     | 5.46045e-005 | 1.34652 | E11.5 * Sox10 up vs E11.5 * Ctrl |
| 10361200 AA408296      | NM_145415     | 2.19171e-006 | 1.34618 | E11.5 * Sox10 up vs E11.5 * Ctrl |
| 10550638 Rtn2          | NM_013648     | 1.48649e-005 | 1.34604 | E11.5 * Sox10 up vs E11.5 * Ctrl |
| 10557450 Bola2         | NM_175103     | 3.20236e-005 | 1.34526 | E11.5 * Sox10 up vs E11.5 * Ctrl |
| 10457205 Crem          | NM_001110856  | 0.00219022   | 1.34524 | E11.5 * Sox10 up vs E11.5 * Ctrl |
| 10478967 Cstf1         | NM_024199     | 0.00284382   | 1.345   | E11.5 * Sox10 up vs E11.5 * Ctrl |
| 10384936 Acyp2         | NM_029344     | 0.000119041  | 1.34492 | E11.5 * Sox10 up vs E11.5 * Ctrl |
| 10373728 Patz1         | NM_019574     | 0.00537172   | 1.34474 | E11.5 * Sox10 up vs E11.5 * Ctrl |
| 10529547               | ---           | 0.000987447  | 1.34466 | E11.5 * Sox10 up vs E11.5 * Ctrl |
| 10580365 4921524J17Rik | NM_025722     | 0.00121092   | 1.34452 | E11.5 * Sox10 up vs E11.5 * Ctrl |
| 10368556 Hey2          | NM_013904     | 0.00505212   | 1.34447 | E11.5 * Sox10 up vs E11.5 * Ctrl |
| 10392983 Slc25a19      | NM_026071     | 0.000711046  | 1.34424 | E11.5 * Sox10 up vs E11.5 * Ctrl |
| 10584741 Slc37a4       | NM_008063     | 0.00644696   | 1.34402 | E11.5 * Sox10 up vs E11.5 * Ctrl |
| 10346000 Gulp1         | NM_028450     | 0.00473396   | 1.34354 | E11.5 * Sox10 up vs E11.5 * Ctrl |
| 10468275 Pcgf6         | NM_027654     | 1.32532e-005 | 1.34352 | E11.5 * Sox10 up vs E11.5 * Ctrl |
| 10441064 Dscr3         | NM_007834     | 0.00793463   | 1.34325 | E11.5 * Sox10 up vs E11.5 * Ctrl |
| 10591960 Vps26b        | NM_178027     | 0.00306015   | 1.34288 | E11.5 * Sox10 up vs E11.5 * Ctrl |
| 10574033 Nup93         | NM_172410     | 1.67477e-008 | 1.34267 | E11.5 * Sox10 up vs E11.5 * Ctrl |
| 10456248 Onecut2       | NM_194268     | 0.00126798   | 1.34264 | E11.5 * Sox10 up vs E11.5 * Ctrl |
| 10538354 1200009O22Rik | BC043099      | 5.72461e-006 | 1.3425  | E11.5 * Sox10 up vs E11.5 * Ctrl |
| 10507529 Med8          | NM_020000     | 0.00032852   | 1.34247 | E11.5 * Sox10 up vs E11.5 * Ctrl |
| 10347734 Sgpp2         | NM_001004173  | 0.000206985  | 1.34214 | E11.5 * Sox10 up vs E11.5 * Ctrl |
| 10593225 Zbtb16        | NM_001033324  | 0.00154988   | 1.34211 | E11.5 * Sox10 up vs E11.5 * Ctrl |
| 10493193 Cct3          | NM_009836     | 8.92418e-005 | 1.34206 | E11.5 * Sox10 up vs E11.5 * Ctrl |
| 10400805 Nin           | NM_008697     | 3.11721e-006 | 1.3419  | E11.5 * Sox10 up vs E11.5 * Ctrl |
| 10558910 Rangrf        | NM_021329     | 0.0048861    | 1.34188 | E11.5 * Sox10 up vs E11.5 * Ctrl |
| 10574204 Arl2bp        | NM_024191     | 5.75068e-006 | 1.34178 | E11.5 * Sox10 up vs E11.5 * Ctrl |
| 10570870 1700041G16Rik | ENSMUST000000 | 0.00296074   | 1.34176 | E11.5 * Sox10 up vs E11.5 * Ctrl |
| 10592237 Ei24          | NM_007915     | 0.00719222   | 1.34161 | E11.5 * Sox10 up vs E11.5 * Ctrl |
| 10352348 Cnih4         | NM_030131     | 1.64331e-005 | 1.34149 | E11.5 * Sox10 up vs E11.5 * Ctrl |
| 10427877 ENSMUSG00000  | AK157781      | 0.00657606   | 1.34146 | E11.5 * Sox10 up vs E11.5 * Ctrl |
| 10560408 Psg17         | NM_007677     | 0.00707664   | 1.34134 | E11.5 * Sox10 up vs E11.5 * Ctrl |
| 10367413 Dnajc14       | NM_028873     | 0.000203602  | 1.34074 | E11.5 * Sox10 up vs E11.5 * Ctrl |
| 10450055 H2-Ke2        | NM_010385     | 0.000324266  | 1.3407  | E11.5 * Sox10 up vs E11.5 * Ctrl |

|          |               |              |              |         |                                  |
|----------|---------------|--------------|--------------|---------|----------------------------------|
| 10601903 | Zcchc18       | NM_001035510 | 0.0104043    | 1.34039 | E11.5 * Sox10 up vs E11.5 * Ctrl |
| 10458183 | Gfra3         | NM_010280    | 0.00184648   | 1.34023 | E11.5 * Sox10 up vs E11.5 * Ctrl |
| 10470529 | Olfr1         | NM_019498    | 3.75147e-005 | 1.34008 | E11.5 * Sox10 up vs E11.5 * Ctrl |
| 10589494 | Cspg5         | NM_013884    | 0.00139272   | 1.34001 | E11.5 * Sox10 up vs E11.5 * Ctrl |
| 10397094 | Psen1         | NM_008943    | 4.03068e-005 | 1.34001 | E11.5 * Sox10 up vs E11.5 * Ctrl |
| 10495111 | Wdr77         | NM_027432    | 2.83449e-005 | 1.3399  | E11.5 * Sox10 up vs E11.5 * Ctrl |
| 10546855 | Srgap3        | NM_080448    | 7.01947e-006 | 1.33965 | E11.5 * Sox10 up vs E11.5 * Ctrl |
| 10533386 | Sh2b3         | NM_008507    | 0.000121331  | 1.33946 | E11.5 * Sox10 up vs E11.5 * Ctrl |
| 10464877 | Dpp3          | NM_133803    | 0.000848403  | 1.33887 | E11.5 * Sox10 up vs E11.5 * Ctrl |
| 10580309 | 1500041N16Rik | NM_026399    | 5.82517e-005 | 1.33883 | E11.5 * Sox10 up vs E11.5 * Ctrl |
| 10586604 | Rps27l        | NM_026467    | 0.00020516   | 1.33859 | E11.5 * Sox10 up vs E11.5 * Ctrl |
| 10499777 | Ints3         | NM_145540    | 0.00039354   | 1.33846 | E11.5 * Sox10 up vs E11.5 * Ctrl |
| 10561907 | 0610010E21Rik | NM_001033140 | 2.71188e-005 | 1.33841 | E11.5 * Sox10 up vs E11.5 * Ctrl |
| 10388018 | Dhx33         | NM_178367    | 0.000709473  | 1.33803 | E11.5 * Sox10 up vs E11.5 * Ctrl |
| 10422179 | Pou4f1        | NM_011143    | 0.00128625   | 1.33798 | E11.5 * Sox10 up vs E11.5 * Ctrl |
| 10514896 | 2210012G02Rik | NM_025617    | 0.00133342   | 1.33787 | E11.5 * Sox10 up vs E11.5 * Ctrl |
| 10430113 | D15Wsu169e    | BC060637     | 0.00330644   | 1.33775 | E11.5 * Sox10 up vs E11.5 * Ctrl |
| 10601390 | Pgk1          | NM_008828    | 2.40982e-008 | 1.33773 | E11.5 * Sox10 up vs E11.5 * Ctrl |
| 10344637 | Atp6v1h       | NM_133826    | 1.30101e-005 | 1.33771 | E11.5 * Sox10 up vs E11.5 * Ctrl |
| 10369301 | Chst3         | NM_016803    | 9.83815e-005 | 1.33765 | E11.5 * Sox10 up vs E11.5 * Ctrl |
| 10358617 | Hmcn1         | NM_001024720 | 0.00878547   | 1.33757 | E11.5 * Sox10 up vs E11.5 * Ctrl |
| 10349208 | Ctnnap5a      | NM_001077425 | 0.00289444   | 1.33728 | E11.5 * Sox10 up vs E11.5 * Ctrl |
| 10369295 | D10Ert641e    | NM_025514    | 0.000154518  | 1.33702 | E11.5 * Sox10 up vs E11.5 * Ctrl |
| 10453900 | Riok3         | NM_024182    | 0.000244981  | 1.33694 | E11.5 * Sox10 up vs E11.5 * Ctrl |
| 10544858 | Chn2          | NM_023543    | 0.00587604   | 1.33684 | E11.5 * Sox10 up vs E11.5 * Ctrl |
| 10593196 | ENSMUSG00000  | ENSMUST00000 | 0.000381958  | 1.33647 | E11.5 * Sox10 up vs E11.5 * Ctrl |
| 10465844 | Asrgl1        | NM_025610    | 1.70195e-005 | 1.33636 | E11.5 * Sox10 up vs E11.5 * Ctrl |
| 10505109 | BC026590      | BC026590     | 0.000518588  | 1.33618 | E11.5 * Sox10 up vs E11.5 * Ctrl |
| 10408975 | Kif13a        | NM_010617    | 0.000611496  | 1.33616 | E11.5 * Sox10 up vs E11.5 * Ctrl |
| 10382376 | Ttyh2         | NM_053273    | 0.00228858   | 1.33613 | E11.5 * Sox10 up vs E11.5 * Ctrl |
| 10536541 | St7           | NM_022332    | 0.00046301   | 1.33611 | E11.5 * Sox10 up vs E11.5 * Ctrl |
| 10440738 | Tiam1         | NM_009384    | 0.000466278  | 1.33595 | E11.5 * Sox10 up vs E11.5 * Ctrl |
| 10388749 | Traf4         | NM_009423    | 0.000860463  | 1.33564 | E11.5 * Sox10 up vs E11.5 * Ctrl |
| 10582712 | Egln1         | NM_053207    | 3.07565e-006 | 1.33564 | E11.5 * Sox10 up vs E11.5 * Ctrl |
| 10546163 | Mcm2          | NM_008564    | 0.00206299   | 1.33543 | E11.5 * Sox10 up vs E11.5 * Ctrl |
| 10477353 | Mapre1        | NM_007896    | 1.38079e-006 | 1.33535 | E11.5 * Sox10 up vs E11.5 * Ctrl |
| 10421197 | Chmp7         | NM_134078    | 0.00266149   | 1.33512 | E11.5 * Sox10 up vs E11.5 * Ctrl |
| 10559312 | Dhcr7         | NM_007856    | 0.00182637   | 1.335   | E11.5 * Sox10 up vs E11.5 * Ctrl |
| 10518561 | Apitd1        | NM_027263    | 0.00303223   | 1.33491 | E11.5 * Sox10 up vs E11.5 * Ctrl |
| 10507557 | Ebna1bp2      | NM_026932    | 1.46512e-005 | 1.33468 | E11.5 * Sox10 up vs E11.5 * Ctrl |
| 10426098 | Creld2        | NM_029720    | 2.90438e-006 | 1.33466 | E11.5 * Sox10 up vs E11.5 * Ctrl |
| 10579437 | Ccdc124       | NM_026964    | 0.00390303   | 1.33449 | E11.5 * Sox10 up vs E11.5 * Ctrl |
| 10431872 | Slc38a1       | ENSMUST00000 | 9.88477e-005 | 1.33426 | E11.5 * Sox10 up vs E11.5 * Ctrl |
| 10409616 | Spock1        | NM_009262    | 0.00300315   | 1.33402 | E11.5 * Sox10 up vs E11.5 * Ctrl |
| 10363669 | Dnajc12       | NM_013888    | 0.00103841   | 1.3337  | E11.5 * Sox10 up vs E11.5 * Ctrl |
| 10468929 | Nmt2          | NM_008708    | 0.000141274  | 1.33346 | E11.5 * Sox10 up vs E            |

|          |               |              |              |         |                                  |
|----------|---------------|--------------|--------------|---------|----------------------------------|
| 10480381 | Arhgap21      | NM_001128084 | 1.2553e-007  | 1.32938 | E11.5 * Sox10 up vs E11.5 * Ctrl |
| 10524314 | Pitpnb        | NM_019640    | 2.97933e-006 | 1.32938 | E11.5 * Sox10 up vs E11.5 * Ctrl |
| 10477644 | Trp53inp2     | NM_178111    | 0.000631687  | 1.32935 | E11.5 * Sox10 up vs E11.5 * Ctrl |
| 10418218 | Slmap         | NM_032008    | 1.4273e-005  | 1.32925 | E11.5 * Sox10 up vs E11.5 * Ctrl |
| 10438460 | Parl          | NM_001005767 | 0.00346843   | 1.32887 | E11.5 * Sox10 up vs E11.5 * Ctrl |
| 10586174 | ---           | ---          | 0.00159098   | 1.32864 | E11.5 * Sox10 up vs E11.5 * Ctrl |
| 10596637 | Mapkapk3      | NM_178907    | 0.00286354   | 1.32855 | E11.5 * Sox10 up vs E11.5 * Ctrl |
| 10572290 | Nr2c2ap       | NM_001025586 | 0.00375066   | 1.32842 | E11.5 * Sox10 up vs E11.5 * Ctrl |
| 10383970 | Kremen1       | NM_032396    | 0.000791259  | 1.32823 | E11.5 * Sox10 up vs E11.5 * Ctrl |
| 10433996 | Snap29        | NM_023348    | 0.000308681  | 1.32812 | E11.5 * Sox10 up vs E11.5 * Ctrl |
| 10465011 | Sart1         | NM_016882    | 0.000103409  | 1.32799 | E11.5 * Sox10 up vs E11.5 * Ctrl |
| 10514398 | 5830433M19Rik | BC020067     | 0.00123437   | 1.3278  | E11.5 * Sox10 up vs E11.5 * Ctrl |
| 10581940 | Kars          | NM_001130868 | 0.00011448   | 1.32752 | E11.5 * Sox10 up vs E11.5 * Ctrl |
| 10413752 | Bap1          | NM_027088    | 0.00930043   | 1.32739 | E11.5 * Sox10 up vs E11.5 * Ctrl |
| 10595836 | E030011O05Rik | ENSMUST00000 | 0.00174179   | 1.32737 | E11.5 * Sox10 up vs E11.5 * Ctrl |
| 10505200 | Hsd12         | NM_024255    | 0.00020018   | 1.3273  | E11.5 * Sox10 up vs E11.5 * Ctrl |
| 10393774 | Nploc4        | NM_199469    | 0.000154282  | 1.32714 | E11.5 * Sox10 up vs E11.5 * Ctrl |
| 10425822 | Pnpla3        | NM_054088    | 0.000687228  | 1.32682 | E11.5 * Sox10 up vs E11.5 * Ctrl |
| 10358672 | Hmcn1         | NM_001024720 | 0.00243852   | 1.32669 | E11.5 * Sox10 up vs E11.5 * Ctrl |
| 10485225 | Ext2          | NM_010163    | 0.000194219  | 1.32662 | E11.5 * Sox10 up vs E11.5 * Ctrl |
| 10567941 | Elf3c         | NM_146200    | 5.69657e-008 | 1.32657 | E11.5 * Sox10 up vs E11.5 * Ctrl |
| 10440388 | Hspa13        | NR_027492    | 0.00627863   | 1.32647 | E11.5 * Sox10 up vs E11.5 * Ctrl |
| 10374485 | Peli1         | NM_023324    | 0.000663883  | 1.32639 | E11.5 * Sox10 up vs E11.5 * Ctrl |
| 10385175 | Wwc1          | NM_170779    | 0.00029853   | 1.32601 | E11.5 * Sox10 up vs E11.5 * Ctrl |
| 10521907 | 1810013D10Rik | NM_001145433 | 0.00958809   | 1.32598 | E11.5 * Sox10 up vs E11.5 * Ctrl |
| 10383671 | Drg1          | NM_007879    | 3.20234e-006 | 1.32581 | E11.5 * Sox10 up vs E11.5 * Ctrl |
| 10557231 | EG628696      | XR_004960    | 0.00966157   | 1.32544 | E11.5 * Sox10 up vs E11.5 * Ctrl |
| 10373036 | Os9           | NM_177614    | 0.00199303   | 1.32512 | E11.5 * Sox10 up vs E11.5 * Ctrl |
| 10449394 | Taf11         | NM_026836    | 3.624e-006   | 1.32493 | E11.5 * Sox10 up vs E11.5 * Ctrl |
| 10600377 | Atp6ap1       | NM_018794    | 0.00561644   | 1.3249  | E11.5 * Sox10 up vs E11.5 * Ctrl |
| 10561679 | Psmd8         | NM_026545    | 0.00023029   | 1.32484 | E11.5 * Sox10 up vs E11.5 * Ctrl |
| 10375083 | Stk10         | NM_009288    | 0.00014414   | 1.32473 | E11.5 * Sox10 up vs E11.5 * Ctrl |
| 10405074 | Nol8          | NM_001081350 | 0.000325096  | 1.32461 | E11.5 * Sox10 up vs E11.5 * Ctrl |
| 10447354 | Txndc14       | NM_025868    | 0.00110956   | 1.32438 | E11.5 * Sox10 up vs E11.5 * Ctrl |
| 10511207 | Cpsf3l        | NM_028020    | 0.000162645  | 1.32435 | E11.5 * Sox10 up vs E11.5 * Ctrl |
| 10591967 | Jam3          | NM_023277    | 0.000317291  | 1.3243  | E11.5 * Sox10 up vs E11.5 * Ctrl |
| 10507418 | Elf2b3        | NM_001111277 | 0.00179024   | 1.32424 | E11.5 * Sox10 up vs E11.5 * Ctrl |
| 10381668 | Nmt1          | NM_008707    | 1.08917e-005 | 1.32407 | E11.5 * Sox10 up vs E11.5 * Ctrl |
| 10389010 | 5730455P16Rik | NM_027472    | 0.00393373   | 1.3237  | E11.5 * Sox10 up vs E11.5 * Ctrl |
| 10435752 | Lsamp         | NM_175548    | 0.000198723  | 1.32368 | E11.5 * Sox10 up vs E11.5 * Ctrl |
| 10358658 | Hmcn1         | NM_001024720 | 0.00127593   | 1.32349 | E11.5 * Sox10 up vs E11.5 * Ctrl |
| 10395142 | Sh3yl1        | NM_013709    | 0.000215836  | 1.32336 | E11.5 * Sox10 up vs E11.5 * Ctrl |
| 10347774 | Mrpl44        | NM_001081210 | 0.000338427  | 1.32318 | E11.5 * Sox10 up vs E11.5 * Ctrl |
| 10578149 | Leprotil1     | NM_026609    | 2.17964e-006 | 1.32314 | E11.5 * Sox10 up vs E11.5 * Ctrl |
| 10524105 | Chfr          | NM_172717    | 6.8581e-005  | 1.32308 | E11.5 * Sox10 up vs E11.5 * Ctrl |
| 10400189 | EG636070      | XR_030785    | 0.00393016   | 1.32258 | E11.5 * Sox10 up vs E11.5 * Ctrl |
| 10516246 | Cdca8         | NM_026560    | 2.81464e-005 | 1.32257 | E11.5 * Sox10 up vs E11.5 * Ctrl |
| 10482824 | Acvr1         | NM_001110204 | 3.04133e-006 | 1.32245 | E11.5 * Sox10 up vs E11.5 * Ctrl |
| 10553280 | Gtf2h1        | NM_008186    | 0.000180389  | 1.32228 | E11.5 * Sox10 up vs E11.5 * Ctrl |
| 10357630 | Srgap2        | NM_001081011 | 0.000970772  | 1.32184 | E11.5 * Sox10 up vs E11.5 * Ctrl |
| 10425226 | Elf3l         | NM_145139    | 2.39401e-006 | 1.32154 | E11.5 * Sox10 up vs E11.5 * Ctrl |
| 10541091 | Gemin6        | NM_026053    | 0.000227583  | 1.3215  | E11.5 * Sox10 up vs E11.5 * Ctrl |
| 10593270 | Ttc12         | NM_172770    | 0.000113307  | 1.32126 | E11.5 * Sox10 up vs E11.5 * Ctrl |
| 10596680 | Sema3b        | NM_001042779 | 0.00186507   | 1.32125 | E11.5 * Sox10 up vs E11.5 * Ctrl |
| 10421661 | Gtf2f2        | NM_026816    | 2.05918e-005 | 1.32124 | E11.5 * Sox10 up vs E11.5 * Ctrl |
| 10362904 | Rtn4ip1       | NM_130892    | 0.00140761   | 1.32113 | E11.5 * Sox10 up vs E11.5 * Ctrl |
| 10416666 | Sugt1         | NM_026474    | 0.000169139  | 1.32094 | E11.5 * Sox10 up vs E11.5 * Ctrl |
| 10487371 | Ciao1         | NM_025296    | 0.000850544  | 1.3206  | E11.5 * Sox10 up vs E11.5 * Ctrl |
| 10497752 | Carhsp1       | NM_025821    | 0.00713082   | 1.32004 | E11.5 * Sox10 up vs E11.5 * Ctrl |
| 10452892 | Fam98a        | NM_133747    | 0.000533803  | 1.31976 | E11.5 * Sox10 up vs E11.5 * Ctrl |
| 10373569 | Rpsa          | NM_011029    | 0.00823663   | 1.31972 | E11.5 * Sox10 up vs E11.5 * Ctrl |
| 10399555 | Kcnf1         | NM_201531    | 0.00880846   | 1.31927 | E11.5 * Sox10 up vs E11.5 * Ctrl |
| 10494804 | Casq2         | NM_009814    | 0.0032713    | 1.31883 | E11.5 * Sox10 up vs E11.5 * Ctrl |
| 10607317 | Tsr2          | NM_175146    | 0.00310375   | 1.31877 | E11.5 * Sox10 up vs E11.5 * Ctrl |
| 10441815 | Sod2          | NM_013671    | 0.000323424  | 1.31853 | E11.5 * Sox10 up vs E11.5 * Ctrl |
| 10550632 | Opa3          | NM_207525    | 0.00203521   | 1.31842 | E11.5 * Sox10 up vs E11.5 * Ctrl |

|                        |               |              |         |                                  |
|------------------------|---------------|--------------|---------|----------------------------------|
| 10367634 Akap12        | NM_031185     | 2.41318e-005 | 1.31836 | E11.5 * Sox10 up vs E11.5 * Ctrl |
| 10431948 Rpap3         | NM_028003     | 0.00155121   | 1.31833 | E11.5 * Sox10 up vs E11.5 * Ctrl |
| 10516305 Mtap7d1       | NM_144941     | 6.78325e-006 | 1.31808 | E11.5 * Sox10 up vs E11.5 * Ctrl |
| 10410929 Agk           | NM_023538     | 0.00365254   | 1.31796 | E11.5 * Sox10 up vs E11.5 * Ctrl |
| 10380986 Psmd3         | NM_009439     | 0.000772493  | 1.31785 | E11.5 * Sox10 up vs E11.5 * Ctrl |
| 10447431 Foxn2         | NM_180974     | 4.30988e-006 | 1.31738 | E11.5 * Sox10 up vs E11.5 * Ctrl |
| 10502881 St6galnac5    | NM_012028     | 0.000788597  | 1.31732 | E11.5 * Sox10 up vs E11.5 * Ctrl |
| 10575102 Cirh1a        | NM_011574     | 0.000457557  | 1.31715 | E11.5 * Sox10 up vs E11.5 * Ctrl |
| 10510604 Dnajc11       | NM_172704     | 0.001335     | 1.3164  | E11.5 * Sox10 up vs E11.5 * Ctrl |
| 10375499 Snord96a      | AJ132685      | 0.00437255   | 1.31621 | E11.5 * Sox10 up vs E11.5 * Ctrl |
| 10394809 EG668645      | XR_033945     | 0.00938162   | 1.31618 | E11.5 * Sox10 up vs E11.5 * Ctrl |
| 10394816 EG668645      | XR_033945     | 0.00938162   | 1.31618 | E11.5 * Sox10 up vs E11.5 * Ctrl |
| 10350247 Kif21b        | NM_001039472  | 0.000351754  | 1.31605 | E11.5 * Sox10 up vs E11.5 * Ctrl |
| 10468533 Gpam          | NM_008149     | 0.000177204  | 1.31605 | E11.5 * Sox10 up vs E11.5 * Ctrl |
| 10582295 Odc1          | NM_013614     | 0.00011156   | 1.31603 | E11.5 * Sox10 up vs E11.5 * Ctrl |
| 10543004 Pon2          | NM_183308     | 0.00100267   | 1.31586 | E11.5 * Sox10 up vs E11.5 * Ctrl |
| 10425267 Pick1         | NM_008837     | 0.00157853   | 1.31582 | E11.5 * Sox10 up vs E11.5 * Ctrl |
| 10400095 Ifrd1         | NM_013562     | 0.0014574    | 1.31578 | E11.5 * Sox10 up vs E11.5 * Ctrl |
| 10420659 6330409N04Rik | NM_025697     | 2.99277e-005 | 1.31556 | E11.5 * Sox10 up vs E11.5 * Ctrl |
| 10487969 Trmt6         | NM_175113     | 0.00154164   | 1.31551 | E11.5 * Sox10 up vs E11.5 * Ctrl |
| 10348653 Gpc1          | NM_016696     | 0.00200541   | 1.31515 | E11.5 * Sox10 up vs E11.5 * Ctrl |
| 10446470 ENSMUSG0000C  | ENSMUST000001 | 0.00314073   | 1.31493 | E11.5 * Sox10 up vs E11.5 * Ctrl |
| 10496397 Mapksp1       | NM_019920     | 0.00010729   | 1.31484 | E11.5 * Sox10 up vs E11.5 * Ctrl |
| 10511149 Mrpl20        | NM_025570     | 0.00263767   | 1.31414 | E11.5 * Sox10 up vs E11.5 * Ctrl |
| 10462346 Rcl1          | NM_021525     | 2.13689e-005 | 1.3141  | E11.5 * Sox10 up vs E11.5 * Ctrl |
| 10383575 Tbcd          | NM_029878     | 7.87047e-006 | 1.31388 | E11.5 * Sox10 up vs E11.5 * Ctrl |
| 10457733 B4galt6       | NM_019737     | 0.00044904   | 1.31382 | E11.5 * Sox10 up vs E11.5 * Ctrl |
| 10430389 Mfng          | NM_008595     | 0.00103317   | 1.31374 | E11.5 * Sox10 up vs E11.5 * Ctrl |
| 10591726 Ecsit         | NM_012029     | 0.000888484  | 1.31369 | E11.5 * Sox10 up vs E11.5 * Ctrl |
| 10548194 Fkbp4         | NM_010219     | 0.00226653   | 1.31363 | E11.5 * Sox10 up vs E11.5 * Ctrl |
| 10537463 Agk           | NM_023538     | 7.37139e-007 | 1.31329 | E11.5 * Sox10 up vs E11.5 * Ctrl |
| 10498038 Elf2          | NM_023502     | 3.74212e-005 | 1.31308 | E11.5 * Sox10 up vs E11.5 * Ctrl |
| 10582599 Nup133        | NM_172288     | 0.000142546  | 1.31299 | E11.5 * Sox10 up vs E11.5 * Ctrl |
| 10524668 Coq5          | NM_026504     | 0.00269489   | 1.31289 | E11.5 * Sox10 up vs E11.5 * Ctrl |
| 10584142 Ets1          | NM_011808     | 0.000470417  | 1.31286 | E11.5 * Sox10 up vs E11.5 * Ctrl |
| 10409265 Auh           | NM_016709     | 0.00186767   | 1.31279 | E11.5 * Sox10 up vs E11.5 * Ctrl |
| 10589087 Prkar2a       | NM_008924     | 0.000476334  | 1.31249 | E11.5 * Sox10 up vs E11.5 * Ctrl |
| 10373950 Nipsnap1      | NM_008698     | 0.000132409  | 1.31208 | E11.5 * Sox10 up vs E11.5 * Ctrl |
| 10345350               | ---           | 0.000700537  | 1.31205 | E11.5 * Sox10 up vs E11.5 * Ctrl |
| 10564692 Mrpl46        | NM_023331     | 0.00211716   | 1.31156 | E11.5 * Sox10 up vs E11.5 * Ctrl |
| 10351269 4930455F23Rik | NM_029115     | 0.000882283  | 1.31132 | E11.5 * Sox10 up vs E11.5 * Ctrl |
| 10526614 Actl6b        | NM_031404     | 0.00333957   | 1.31111 | E11.5 * Sox10 up vs E11.5 * Ctrl |
| 10406229 Pcsk1         | NM_013628     | 0.00548705   | 1.31107 | E11.5 * Sox10 up vs E11.5 * Ctrl |
| 10425559 L3mbtl2       | NM_145993     | 6.30187e-005 | 1.31095 | E11.5 * Sox10 up vs E11.5 * Ctrl |
| 10461237 Bsc12         | NM_001136064  | 0.000235651  | 1.31087 | E11.5 * Sox10 up vs E11.5 * Ctrl |
| 10576873 Elavl1        | NM_010485     | 2.66367e-005 | 1.31079 | E11.5 * Sox10 up vs E11.5 * Ctrl |
| 10576274 Zfp276        | NM_020497     | 0.00243031   | 1.31066 | E11.5 * Sox10 up vs E11.5 * Ctrl |
| 10407543 Gtpbp4        | NM_027000     | 8.1595e-006  | 1.3106  | E11.5 * Sox10 up vs E11.5 * Ctrl |
| 10501183 4933431E20Rik | BC060136      | 0.00559248   | 1.3103  | E11.5 * Sox10 up vs E11.5 * Ctrl |
| 10470705 Rapgef1       | NM_001039087  | 0.00107989   | 1.31009 | E11.5 * Sox10 up vs E11.5 * Ctrl |
| 10539606 Cct7          | NM_007638     | 2.73057e-005 | 1.31    | E11.5 * Sox10 up vs E11.5 * Ctrl |
| 10405619 5133401N09Rik | NM_198004     | 0.000164635  | 1.30995 | E11.5 * Sox10 up vs E11.5 * Ctrl |
| 10427494               | ---           | 0.00632412   | 1.30943 | E11.5 * Sox10 up vs E11.5 * Ctrl |
| 10465804 Polr2g        | NM_026329     | 9.61267e-005 | 1.30916 | E11.5 * Sox10 up vs E11.5 * Ctrl |
| 10436941 Mrps6         | NM_080456     | 0.0050313    | 1.30909 | E11.5 * Sox10 up vs E11.5 * Ctrl |
| 10360934 Rrp15         | NM_026041     | 5.03066e-005 | 1.30882 | E11.5 * Sox10 up vs E11.5 * Ctrl |
| 10402665 Cdc42bpb      | NM_183016     | 0.00208402   | 1.30878 | E11.5 * Sox10 up vs E11.5 * Ctrl |
| 10433462 Pmm2          | NM_016881     | 0.00247398   | 1.3087  | E11.5 * Sox10 up vs E11.5 * Ctrl |
| 10373577 Ormdl2        | NM_024180     | 0.00191773   | 1.30862 | E11.5 * Sox10 up vs E11.5 * Ctrl |
| 10512728 BC057893      | NM_173033     | 0.000426763  | 1.30821 | E11.5 * Sox10 up vs E11.5 * Ctrl |
| 10543551 Rbm28         | NM_133925     | 7.39005e-005 | 1.3082  | E11.5 * Sox10 up vs E11.5 * Ctrl |
| 10564849 2610034B18Rik | NM_027420     | 5.00392e-005 | 1.3082  | E11.5 * Sox10 up vs E11.5 * Ctrl |
| 10415725 Spata13       | BC138455      | 0.00289438   | 1.30806 | E11.5 * Sox10 up vs E11.5 * Ctrl |
| 10381776 Mapt          | NM_001038609  | 0.00493967   | 1.308   | E11.5 * Sox10 up vs E11.5 * Ctrl |
| 10363563 Slc25a16      | NM_175194     | 0.00769362   | 1.30724 | E11.5 * Sox10 up vs E11.5 * Ctrl |
| 10561854 Tbcb          | NM_025548     | 0.000499533  | 1.30721 | E11.5 * Sox10 up vs E11.5 * Ctrl |

|          |               |              |              |         |                                  |
|----------|---------------|--------------|--------------|---------|----------------------------------|
| 10596951 | Arih2         | NM_011790    | 0.000973877  | 1.30694 | E11.5 * Sox10 up vs E11.5 * Ctrl |
| 10606835 | Bex2          | NM_009749    | 0.00403353   | 1.30673 | E11.5 * Sox10 up vs E11.5 * Ctrl |
| 10586384 | Pdcd7         | NM_016688    | 0.000782311  | 1.30663 | E11.5 * Sox10 up vs E11.5 * Ctrl |
| 10585509 | Fbxo22        | NM_028049    | 0.00334086   | 1.30653 | E11.5 * Sox10 up vs E11.5 * Ctrl |
| 10459844 | Haus1         | NM_146089    | 0.000283966  | 1.30646 | E11.5 * Sox10 up vs E11.5 * Ctrl |
| 10539882 | Ruvbl1        | NM_019685    | 5.22401e-005 | 1.30643 | E11.5 * Sox10 up vs E11.5 * Ctrl |
| 10383289 | Baiap2        | NM_130862    | 0.00156253   | 1.30634 | E11.5 * Sox10 up vs E11.5 * Ctrl |
| 10499045 | Trim2         | NM_030706    | 7.52896e-005 | 1.30621 | E11.5 * Sox10 up vs E11.5 * Ctrl |
| 10432404 | Tuba1a        | NM_011653    | 6.61728e-005 | 1.306   | E11.5 * Sox10 up vs E11.5 * Ctrl |
| 10519472 | ENSMUSG0000C  | NM_001042670 | 0.00730423   | 1.30537 | E11.5 * Sox10 up vs E11.5 * Ctrl |
| 10499981 | Oaz3          | NM_016901    | 0.00496772   | 1.30537 | E11.5 * Sox10 up vs E11.5 * Ctrl |
| 10352396 | Trp53bp2      | NM_173378    | 2.46935e-005 | 1.30439 | E11.5 * Sox10 up vs E11.5 * Ctrl |
| 10391755 | Ccdc43        | NM_025918    | 9.41634e-005 | 1.30428 | E11.5 * Sox10 up vs E11.5 * Ctrl |
| 10439732 | Plcx2         | NM_001134480 | 0.00414691   | 1.30418 | E11.5 * Sox10 up vs E11.5 * Ctrl |
| 10458607 | Lars          | NM_134137    | 2.92982e-005 | 1.30403 | E11.5 * Sox10 up vs E11.5 * Ctrl |
| 10511226 | Acap3         | NM_207223    | 0.000591411  | 1.30377 | E11.5 * Sox10 up vs E11.5 * Ctrl |
| 10484431 | Txndc14       | NM_025868    | 0.0013521    | 1.30372 | E11.5 * Sox10 up vs E11.5 * Ctrl |
| 10507379 | Zswim5        | NM_001029912 | 0.00129252   | 1.3036  | E11.5 * Sox10 up vs E11.5 * Ctrl |
| 10573713 | Heatr3        | NM_172757    | 0.000300601  | 1.30356 | E11.5 * Sox10 up vs E11.5 * Ctrl |
| 10424349 | Sqle          | NM_009270    | 0.000413966  | 1.30351 | E11.5 * Sox10 up vs E11.5 * Ctrl |
| 10574718 | Tmem208       | NM_025486    | 0.00141146   | 1.30328 | E11.5 * Sox10 up vs E11.5 * Ctrl |
| 10483228 | Scn3a         | NM_018732    | 0.00859505   | 1.3031  | E11.5 * Sox10 up vs E11.5 * Ctrl |
| 10350848 | 2810025M15Rik | BC055845     | 0.00027198   | 1.30304 | E11.5 * Sox10 up vs E11.5 * Ctrl |
| 10419966 | Zfhx2         | NM_001039198 | 0.00738044   | 1.30302 | E11.5 * Sox10 up vs E11.5 * Ctrl |
| 10456764 | Smad2         | NM_010754    | 1.41924e-005 | 1.30286 | E11.5 * Sox10 up vs E11.5 * Ctrl |
| 10521725 | Med28         | NM_025895    | 0.00330114   | 1.30283 | E11.5 * Sox10 up vs E11.5 * Ctrl |
| 10449452 | Fkbp5         | NM_010220    | 0.0019394    | 1.30276 | E11.5 * Sox10 up vs E11.5 * Ctrl |
| 10370483 | Rrp1          | NM_010925    | 0.0012313    | 1.30263 | E11.5 * Sox10 up vs E11.5 * Ctrl |
| 10511139 | Ssu72         | NM_026899    | 0.000376323  | 1.30262 | E11.5 * Sox10 up vs E11.5 * Ctrl |
| 10481804 | Ralgps1       | NM_175211    | 0.00106501   | 1.30253 | E11.5 * Sox10 up vs E11.5 * Ctrl |
| 10452257 | Slc25a23      | NM_025877    | 0.00574482   | 1.30248 | E11.5 * Sox10 up vs E11.5 * Ctrl |
| 10347873 | Agfg1         | NM_010472    | 3.69298e-005 | 1.30245 | E11.5 * Sox10 up vs E11.5 * Ctrl |
| 10574595 | ---           | ---          | 1.98671e-005 | 1.30241 | E11.5 * Sox10 up vs E11.5 * Ctrl |
| 10587503 | Sh3bgrl2      | NM_172507    | 0.00522783   | 1.30222 | E11.5 * Sox10 up vs E11.5 * Ctrl |
| 10547540 | Mical3        | BC043122     | 0.0075593    | 1.30222 | E11.5 * Sox10 up vs E11.5 * Ctrl |
| 10581729 | Ddx19a        | NM_007916    | 0.0010337    | 1.30208 | E11.5 * Sox10 up vs E11.5 * Ctrl |
| 10452110 | 2410015M20Rik | NM_153152    | 0.00191661   | 1.30167 | E11.5 * Sox10 up vs E11.5 * Ctrl |
| 10599627 | Hprt1         | NM_013556    | 2.91671e-005 | 1.30151 | E11.5 * Sox10 up vs E11.5 * Ctrl |
| 10412076 | Gemin8        | NM_146238    | 0.00332224   | 1.30142 | E11.5 * Sox10 up vs E11.5 * Ctrl |
| 10450814 | Ppp1r11       | NM_029632    | 0.000117832  | 1.30141 | E11.5 * Sox10 up vs E11.5 * Ctrl |
| 10524004 | Pcgf3         | NM_172716    | 1.19115e-005 | 1.30139 | E11.5 * Sox10 up vs E11.5 * Ctrl |
| 10362767 | Mical1        | NM_138315    | 0.00185798   | 1.3013  | E11.5 * Sox10 up vs E11.5 * Ctrl |
| 10604922 | BC023829      | NM_001033328 | 0.000156096  | 1.30095 | E11.5 * Sox10 up vs E11.5 * Ctrl |
| 10460490 | Dpp3          | NM_133803    | 0.000866894  | 1.3009  | E11.5 * Sox10 up vs E11.5 * Ctrl |
| 10351636 | Refbp2        | NM_019484    | 0.00574338   | 1.30072 | E11.5 * Sox10 up vs E11.5 * Ctrl |
| 10407307 | Mocs2         | NM_013826    | 0.00171293   | 1.30066 | E11.5 * Sox10 up vs E11.5 * Ctrl |
| 10458498 | Arap3         | NM_139206    | 0.000535113  | 1.30041 | E11.5 * Sox10 up vs E11.5 * Ctrl |
| 10401891 | Ston2         | NM_175367    | 0.00143577   | 1.30029 | E11.5 * Sox10 up vs E11.5 * Ctrl |
| 10430804 | Pppde2        | NM_134095    | 0.00170629   | 1.3002  | E11.5 * Sox10 up vs E11.5 * Ctrl |
| 10423629 | Pop1          | NM_152894    | 0.00126471   | 1.30005 | E11.5 * Sox10 up vs E11.5 * Ctrl |
| 10568217 | Dctpp1        | NM_023203    | 0.00470675   | 1.3     | E11.5 * Sox10 up vs E11.5 * Ctrl |
| 10375038 | Mpg           | NM_010822    | 0.00998464   | 1.29987 | E11.5 * Sox10 up vs E11.5 * Ctrl |
| 10478778 | Arfgef2       | NM_001085495 | 0.00192848   | 1.2998  | E11.5 * Sox10 up vs E11.5 * Ctrl |
| 10487945 | Prei4         | NM_028802    | 0.00666641   | 1.29977 | E11.5 * Sox10 up vs E11.5 * Ctrl |
| 10598994 | Atp1b3        | NM_007502    | 0.000189775  | 1.29975 | E11.5 * Sox10 up vs E11.5 * Ctrl |
| 10409557 | H2afy         | NM_012015    | 1.48057e-006 | 1.29967 | E11.5 * Sox10 up vs E11.5 * Ctrl |
| 10545940 | Gmcl1         | NM_011818    | 1.42079e-007 | 1.29966 | E11.5 * Sox10 up vs E11.5 * Ctrl |
| 10427035 | Nr4a1         | NM_010444    | 0.00176688   | 1.29962 | E11.5 * Sox10 up vs E11.5 * Ctrl |
| 10345058 | Tmem14a       | NM_029398    | 0.00233798   | 1.29945 | E11.5 * Sox10 up vs E11.5 * Ctrl |
| 10439471 | Ktelc1        | NM_172380    | 0.000691972  | 1.29924 | E11.5 * Sox10 up vs E11.5 * Ctrl |
| 10527430 | Arpc1a        | NM_019767    | 1.0493e-006  | 1.29912 | E11.5 * Sox10 up vs E11.5 * Ctrl |
| 10597627 | Oxsr1         | NM_133985    | 0.000176164  | 1.29888 | E11.5 * Sox10 up vs E11.5 * Ctrl |
| 10487392 | Kcnip3        | NM_019789    | 0.00423094   | 1.29885 | E11.5 * Sox10 up vs E11.5 * Ctrl |
| 10519203 | A230069A22Rik | NM_001033394 | 0.00424166   | 1.29877 | E11.5 * Sox10 up vs E11.5 * Ctrl |
| 10448765 | Mapk8ip3      | NM_013931    | 4.65536e-005 | 1.2987  | E11.5 * Sox10 up vs E11.5 * Ctrl |
| 10534974 | Mcm7          | NM_008568    | 0.0045492    | 1.29868 | E11.5 * Sox10 up vs E11.5 * Ctrl |

|                        |               |              |         |                                  |
|------------------------|---------------|--------------|---------|----------------------------------|
| 10523012 Dck           | NM_007832     | 0.00448201   | 1.29865 | E11.5 * Sox10 up vs E11.5 * Ctrl |
| 10412667 Ptpg          | NM_008981     | 0.000703133  | 1.29839 | E11.5 * Sox10 up vs E11.5 * Ctrl |
| 10439566 Atp6v1a       | NM_007508     | 4.17122e-005 | 1.29818 | E11.5 * Sox10 up vs E11.5 * Ctrl |
| 10443561 1300018I05Rik | NM_028791     | 0.000324906  | 1.29793 | E11.5 * Sox10 up vs E11.5 * Ctrl |
| 10547553 Mical3        | NM_153396     | 0.000723375  | 1.29781 | E11.5 * Sox10 up vs E11.5 * Ctrl |
| 10604630 Mospd1        | NM_027409     | 0.00108041   | 1.29769 | E11.5 * Sox10 up vs E11.5 * Ctrl |
| 10369525 2010107G23Rik | NM_027251     | 0.00286502   | 1.29748 | E11.5 * Sox10 up vs E11.5 * Ctrl |
| 10448707 Tbl3          | NM_145396     | 0.00102375   | 1.29742 | E11.5 * Sox10 up vs E11.5 * Ctrl |
| 10584941 Bace1         | NM_011792     | 0.00289963   | 1.29726 | E11.5 * Sox10 up vs E11.5 * Ctrl |
| 10405001 Bicd2         | NM_001039179  | 0.00146247   | 1.29704 | E11.5 * Sox10 up vs E11.5 * Ctrl |
| 10396694 Churc1        | NM_206534     | 0.00185832   | 1.29693 | E11.5 * Sox10 up vs E11.5 * Ctrl |
| 10433721 Nde1          | NM_023317     | 0.000124849  | 1.29666 | E11.5 * Sox10 up vs E11.5 * Ctrl |
| 10461723 4632417K18Rik | NM_026640     | 0.00813859   | 1.29653 | E11.5 * Sox10 up vs E11.5 * Ctrl |
| 10413238 Cphx          | NM_175342     | 0.00716633   | 1.29641 | E11.5 * Sox10 up vs E11.5 * Ctrl |
| 10413260 Cphx          | NM_175342     | 0.00716633   | 1.29641 | E11.5 * Sox10 up vs E11.5 * Ctrl |
| 10573348 Caca1a        | NM_007578     | 0.000560685  | 1.29629 | E11.5 * Sox10 up vs E11.5 * Ctrl |
| 10587746 Tmem41b       | NM_153525     | 0.000714825  | 1.29611 | E11.5 * Sox10 up vs E11.5 * Ctrl |
| 10491329 Zmat3         | NM_009517     | 0.00133534   | 1.29608 | E11.5 * Sox10 up vs E11.5 * Ctrl |
| 10396800 Plekhh1       | ENSMUST000001 | 1.68209e-005 | 1.29595 | E11.5 * Sox10 up vs E11.5 * Ctrl |
| 10573217 Ddx39         | NM_197982     | 5.42998e-005 | 1.2958  | E11.5 * Sox10 up vs E11.5 * Ctrl |
| 10454564 Ercc3         | NM_133658     | 0.000118811  | 1.29577 | E11.5 * Sox10 up vs E11.5 * Ctrl |
| 10474411 Lin7c         | NM_011699     | 9.78564e-008 | 1.29559 | E11.5 * Sox10 up vs E11.5 * Ctrl |
| 10542522 Plekha5       | NM_144920     | 0.000298023  | 1.29536 | E11.5 * Sox10 up vs E11.5 * Ctrl |
| 10406226 Hnrnpa1l2     | XM_619124     | 0.00176367   | 1.29512 | E11.5 * Sox10 up vs E11.5 * Ctrl |
| 10525804 Atp6v0a2      | NM_011596     | 0.00298786   | 1.29506 | E11.5 * Sox10 up vs E11.5 * Ctrl |
| 10457054 Zadh2         | NM_146090     | 0.000913473  | 1.29483 | E11.5 * Sox10 up vs E11.5 * Ctrl |
| 10603373 Pqbp1         | NM_019478     | 0.000157863  | 1.29481 | E11.5 * Sox10 up vs E11.5 * Ctrl |
| 10376813 Cyt5b         | NM_001029936  | 0.000469239  | 1.29478 | E11.5 * Sox10 up vs E11.5 * Ctrl |
| 10492456 Rsrc1         | NM_025822     | 0.00777168   | 1.29447 | E11.5 * Sox10 up vs E11.5 * Ctrl |
| 10471967 Mbd5          | NM_029924     | 0.00233631   | 1.29429 | E11.5 * Sox10 up vs E11.5 * Ctrl |
| 10454851 Cxxc5         | NM_133687     | 0.00158599   | 1.29426 | E11.5 * Sox10 up vs E11.5 * Ctrl |
| 10380641 Hoxb5         | NM_008268     | 3.11681e-005 | 1.29355 | E11.5 * Sox10 up vs E11.5 * Ctrl |
| 10544570 Pcnf          | NM_001024622  | 0.0027914    | 1.29318 | E11.5 * Sox10 up vs E11.5 * Ctrl |
| 10363173 Gja1          | NM_010288     | 6.14891e-005 | 1.29267 | E11.5 * Sox10 up vs E11.5 * Ctrl |
| 10601473 Apool         | NM_026565     | 0.00288849   | 1.29259 | E11.5 * Sox10 up vs E11.5 * Ctrl |
| 10500685 Atp1a1        | NM_144900     | 0.000226347  | 1.29244 | E11.5 * Sox10 up vs E11.5 * Ctrl |
| 10415377 2610027L16Rik | NM_026403     | 0.000327597  | 1.29214 | E11.5 * Sox10 up vs E11.5 * Ctrl |
| 10541711 Phb2          | NM_007531     | 0.000142886  | 1.29201 | E11.5 * Sox10 up vs E11.5 * Ctrl |
| 10574184 Rspry1        | NM_026274     | 0.000184939  | 1.29198 | E11.5 * Sox10 up vs E11.5 * Ctrl |
| 10436053 Dppa2         | NM_028615     | 0.000407707  | 1.29198 | E11.5 * Sox10 up vs E11.5 * Ctrl |
| 10543835 Chchd3        | NM_025336     | 0.000221652  | 1.29195 | E11.5 * Sox10 up vs E11.5 * Ctrl |
| 10430201 Myh9          | NM_022410     | 0.00107008   | 1.29189 | E11.5 * Sox10 up vs E11.5 * Ctrl |
| 10576403 Urb2          | NM_001029876  | 0.0012745    | 1.29181 | E11.5 * Sox10 up vs E11.5 * Ctrl |
| 10521136 Whsc1         | NM_001081102  | 1.64719e-005 | 1.29177 | E11.5 * Sox10 up vs E11.5 * Ctrl |
| 10434467 Psmd2         | NR_027485     | 0.000826518  | 1.29175 | E11.5 * Sox10 up vs E11.5 * Ctrl |
| 10506643 Tmem59        | NM_029565     | 0.000167719  | 1.29159 | E11.5 * Sox10 up vs E11.5 * Ctrl |
| 10402650 2810452K22Rik | NM_026048     | 0.000915415  | 1.29124 | E11.5 * Sox10 up vs E11.5 * Ctrl |
| 10481621 1110008P14Rik | NM_198001     | 0.000752475  | 1.29124 | E11.5 * Sox10 up vs E11.5 * Ctrl |
| 10475245 AV039307      | AK006022      | 0.00247136   | 1.291   | E11.5 * Sox10 up vs E11.5 * Ctrl |
| 10524703 Pxn           | NM_011223     | 0.00149433   | 1.29098 | E11.5 * Sox10 up vs E11.5 * Ctrl |
| 10582719 Sipa1l2       | NM_001081337  | 0.00336102   | 1.29098 | E11.5 * Sox10 up vs E11.5 * Ctrl |
| 10508454 Bsdcl         | NM_133889     | 0.00966966   | 1.29097 | E11.5 * Sox10 up vs E11.5 * Ctrl |
| 10450212 Egfl8         | NM_152922     | 9.06903e-005 | 1.29081 | E11.5 * Sox10 up vs E11.5 * Ctrl |
| 10493703 Jtb           | NM_206924     | 0.0020068    | 1.2908  | E11.5 * Sox10 up vs E11.5 * Ctrl |
| 10396306 1200003C05Rik | NM_024205     | 0.000678228  | 1.29071 | E11.5 * Sox10 up vs E11.5 * Ctrl |
| 10390211 Igfbp1        | NM_009951     | 0.00908936   | 1.29045 | E11.5 * Sox10 up vs E11.5 * Ctrl |
| 10459643 4930503L19Rik | NM_172967     | 0.00486329   | 1.28993 | E11.5 * Sox10 up vs E11.5 * Ctrl |
| 10374228 OTTMUSG00000  | NM_001037928  | 0.00467498   | 1.28988 | E11.5 * Sox10 up vs E11.5 * Ctrl |
| 10479514 Col20a1       | BC016112      | 0.00519174   | 1.28974 | E11.5 * Sox10 up vs E11.5 * Ctrl |
| 10593130 Sidt2         | NM_172257     | 0.0006241    | 1.2896  | E11.5 * Sox10 up vs E11.5 * Ctrl |
| 10379901 Bcas3         | NM_138681     | 0.000397002  | 1.28945 | E11.5 * Sox10 up vs E11.5 * Ctrl |
| 10362392 Psmd2         | NR_027485     | 0.000258682  | 1.28936 | E11.5 * Sox10 up vs E11.5 * Ctrl |
| 10471505 Sh2d3c        | NM_013781     | 0.0019316    | 1.28922 | E11.5 * Sox10 up vs E11.5 * Ctrl |
| 10480921 Qsox2         | NM_153559     | 0.000420452  | 1.28919 | E11.5 * Sox10 up vs E11.5 * Ctrl |
| 10432986 Aaas          | NM_153416     | 0.00142529   | 1.28914 | E11.5 * Sox10 up vs E11.5 * Ctrl |
| 10406898 Taf9          | NM_027592     | 0.000391914  | 1.28911 | E11.5 * Sox10 up vs E11.5 * Ctrl |

|                        |                     |              |         |                                  |
|------------------------|---------------------|--------------|---------|----------------------------------|
| 10579830 Rbmxt         | NM_009033           | 1.38456e-005 | 1.28909 | E11.5 * Sox10 up vs E11.5 * Ctrl |
| 10465895 Fads2         | NM_019699           | 0.0021525    | 1.28889 | E11.5 * Sox10 up vs E11.5 * Ctrl |
| 10369290 Ddit4         | NM_029083           | 4.27478e-005 | 1.28864 | E11.5 * Sox10 up vs E11.5 * Ctrl |
| 10417183 Pcca          | NM_144844           | 0.00101104   | 1.28863 | E11.5 * Sox10 up vs E11.5 * Ctrl |
| 10380648 Hoxb4         | NM_010459           | 0.000788975  | 1.28818 | E11.5 * Sox10 up vs E11.5 * Ctrl |
| 10579825 Pou4f2        | NM_138944           | 3.2841e-005  | 1.28799 | E11.5 * Sox10 up vs E11.5 * Ctrl |
| 10524621 Oasl2         | NM_011854           | 0.000590598  | 1.28793 | E11.5 * Sox10 up vs E11.5 * Ctrl |
| 10414256 Rbmxt         | NM_009033           | 1.6002e-005  | 1.28779 | E11.5 * Sox10 up vs E11.5 * Ctrl |
| 10430265 Eif3d         | NM_018749           | 0.0041664    | 1.28778 | E11.5 * Sox10 up vs E11.5 * Ctrl |
| 10487340 Ncaph         | NM_144818           | 3.23709e-005 | 1.28768 | E11.5 * Sox10 up vs E11.5 * Ctrl |
| 10367292 Cs            | NM_026444           | 7.92105e-005 | 1.28741 | E11.5 * Sox10 up vs E11.5 * Ctrl |
| 10505705 Sh3gl2        | NM_019535           | 0.00124346   | 1.28728 | E11.5 * Sox10 up vs E11.5 * Ctrl |
| 10587194 Gnb5          | NM_138719           | 0.00865102   | 1.28665 | E11.5 * Sox10 up vs E11.5 * Ctrl |
| 10486552 Lrrc57        | NM_001159612        | 0.000120388  | 1.28654 | E11.5 * Sox10 up vs E11.5 * Ctrl |
| 10540168 Fgd5          | NM_172731           | 0.000192146  | 1.28642 | E11.5 * Sox10 up vs E11.5 * Ctrl |
| 10493103 lsg20l2       | NM_177663           | 0.0070795    | 1.28602 | E11.5 * Sox10 up vs E11.5 * Ctrl |
| 10573893 Fto           | NM_011936           | 0.00734458   | 1.28574 | E11.5 * Sox10 up vs E11.5 * Ctrl |
| 10572146 Atp6v1b2      | NM_007509           | 0.00245185   | 1.28554 | E11.5 * Sox10 up vs E11.5 * Ctrl |
| 10377889 Mink1         | NM_001045959        | 0.00278888   | 1.28546 | E11.5 * Sox10 up vs E11.5 * Ctrl |
| 10532857 Gltf          | NM_019821           | 0.00227028   | 1.28513 | E11.5 * Sox10 up vs E11.5 * Ctrl |
| 10406881 Smn1          | NM_011420           | 0.000249266  | 1.28498 | E11.5 * Sox10 up vs E11.5 * Ctrl |
| 10355813 Ptprn         | NM_008985           | 0.00147326   | 1.28477 | E11.5 * Sox10 up vs E11.5 * Ctrl |
| 10373740 Pik3ip1       | NM_178149           | 0.00275859   | 1.28473 | E11.5 * Sox10 up vs E11.5 * Ctrl |
| 10466304 Dtx4          | NM_172442           | 0.000431384  | 1.28412 | E11.5 * Sox10 up vs E11.5 * Ctrl |
| 10473045 Rbm45         | NM_153405           | 0.000210198  | 1.28342 | E11.5 * Sox10 up vs E11.5 * Ctrl |
| 10559996               | 100042997 XR_034250 | 0.000518821  | 1.28335 | E11.5 * Sox10 up vs E11.5 * Ctrl |
| 10589438 Mtap4         | NM_008633           | 0.000124508  | 1.28332 | E11.5 * Sox10 up vs E11.5 * Ctrl |
| 10523772 Lrrc8d        | NM_178701           | 0.0013282    | 1.28304 | E11.5 * Sox10 up vs E11.5 * Ctrl |
| 10507238 Lrrc41        | NM_153521           | 0.00407271   | 1.28285 | E11.5 * Sox10 up vs E11.5 * Ctrl |
| 10548585 Csda          | NM_139117           | 0.00173829   | 1.28267 | E11.5 * Sox10 up vs E11.5 * Ctrl |
| 10578300 Mtmr7         | NM_001040699        | 0.00210858   | 1.28255 | E11.5 * Sox10 up vs E11.5 * Ctrl |
| 10416371 P2ry5         | NM_175116           | 0.0012479    | 1.28241 | E11.5 * Sox10 up vs E11.5 * Ctrl |
| 10561356 Psmc4         | NM_011874           | 0.000409887  | 1.28199 | E11.5 * Sox10 up vs E11.5 * Ctrl |
| 10451763 Satb1         | NM_009122           | 8.1072e-006  | 1.28198 | E11.5 * Sox10 up vs E11.5 * Ctrl |
| 10443021 Atp6v0e       | NM_025272           | 0.000166054  | 1.28189 | E11.5 * Sox10 up vs E11.5 * Ctrl |
| 10444420 Agpat1        | NM_018862           | 0.00476916   | 1.28156 | E11.5 * Sox10 up vs E11.5 * Ctrl |
| 10392328 Nol1          | NM_133702           | 0.00253221   | 1.28141 | E11.5 * Sox10 up vs E11.5 * Ctrl |
| 10466818 Cbwd1         | NM_146097           | 0.00840183   | 1.28124 | E11.5 * Sox10 up vs E11.5 * Ctrl |
| 10435676 Gsk3b         | NM_019827           | 2.11504e-005 | 1.28118 | E11.5 * Sox10 up vs E11.5 * Ctrl |
| 10386230 Rnf187        | AB030190            | 0.00282619   | 1.28111 | E11.5 * Sox10 up vs E11.5 * Ctrl |
| 10608136               | ---                 | 0.0011316    | 1.281   | E11.5 * Sox10 up vs E11.5 * Ctrl |
| 10498296 Commd2        | NM_175095           | 8.82263e-006 | 1.2809  | E11.5 * Sox10 up vs E11.5 * Ctrl |
| 10517731 lgsf21        | NM_198610           | 0.00898655   | 1.28082 | E11.5 * Sox10 up vs E11.5 * Ctrl |
| 10475965 Polr1b        | NM_009086           | 0.000228762  | 1.2799  | E11.5 * Sox10 up vs E11.5 * Ctrl |
| 10471191 Exosc2        | NM_144886           | 0.00140382   | 1.27985 | E11.5 * Sox10 up vs E11.5 * Ctrl |
| 10479649 Prpf6         | NM_133701           | 2.2106e-005  | 1.27971 | E11.5 * Sox10 up vs E11.5 * Ctrl |
| 10518453 Chchd2        | NM_024166           | 0.00745674   | 1.2797  | E11.5 * Sox10 up vs E11.5 * Ctrl |
| 10578922 Klhl2         | NM_178633           | 0.0034241    | 1.27947 | E11.5 * Sox10 up vs E11.5 * Ctrl |
| 10571048 Lsm1          | NM_026032           | 0.00412565   | 1.27933 | E11.5 * Sox10 up vs E11.5 * Ctrl |
| 10559983 Zscan4-ps2    | ENSMUST000001       | 0.000937421  | 1.27907 | E11.5 * Sox10 up vs E11.5 * Ctrl |
| 10465772 Slc3a2        | NM_008577           | 0.00482143   | 1.27907 | E11.5 * Sox10 up vs E11.5 * Ctrl |
| 10400866 Trim9         | NM_053167           | 0.00653607   | 1.27897 | E11.5 * Sox10 up vs E11.5 * Ctrl |
| 10501319 Celsr2        | NM_017392           | 0.00615776   | 1.27879 | E11.5 * Sox10 up vs E11.5 * Ctrl |
| 10503845 Ube2j1        | NM_019586           | 0.000425302  | 1.27862 | E11.5 * Sox10 up vs E11.5 * Ctrl |
| 10579550 Unc13a        | BC058348            | 0.00650821   | 1.27852 | E11.5 * Sox10 up vs E11.5 * Ctrl |
| 10447589 Fbl           | NM_007991           | 6.47059e-005 | 1.27836 | E11.5 * Sox10 up vs E11.5 * Ctrl |
| 10546944 Tmem111       | NM_175101           | 0.000920138  | 1.27824 | E11.5 * Sox10 up vs E11.5 * Ctrl |
| 10511803 2610029101Rik | ENSMUST000001       | 0.00702032   | 1.2782  | E11.5 * Sox10 up vs E11.5 * Ctrl |
| 10365260 Txnrd1        | NM_001042523        | 5.25976e-006 | 1.27785 | E11.5 * Sox10 up vs E11.5 * Ctrl |
| 10553993 Snrpa1        | NM_021336           | 1.96805e-005 | 1.27772 | E11.5 * Sox10 up vs E11.5 * Ctrl |
| 10377681 Dullard       | NM_026017           | 0.000392724  | 1.27751 | E11.5 * Sox10 up vs E11.5 * Ctrl |
| 10500412 Gpr89         | NM_026229           | 0.000152735  | 1.27741 | E11.5 * Sox10 up vs E11.5 * Ctrl |
| 10539342 Rtkn          | NM_133641           | 0.00134456   | 1.27699 | E11.5 * Sox10 up vs E11.5 * Ctrl |
| 10346298 Coq10b        | NM_001039710        | 0.00400852   | 1.27697 | E11.5 * Sox10 up vs E11.5 * Ctrl |
| 10605172 Ard1a         | NM_019870           | 0.0024464    | 1.27696 | E11.5 * Sox10 up vs E11.5 * Ctrl |
| 10497090 Ankrd13c      | NM_001013806        | 0.000184038  | 1.27687 | E11.5 * Sox10 up vs E11.5 * Ctrl |

|          |               |              |              |         |                                  |
|----------|---------------|--------------|--------------|---------|----------------------------------|
| 10356339 | Pde6d         | NM_008801    | 0.0100616    | 1.27684 | E11.5 * Sox10 up vs E11.5 * Ctrl |
| 10434925 | Hes1          | NM_008235    | 0.000211866  | 1.2768  | E11.5 * Sox10 up vs E11.5 * Ctrl |
| 10584071 | Prdm10        | NM_001080817 | 8.3809e-005  | 1.27679 | E11.5 * Sox10 up vs E11.5 * Ctrl |
| 10557628 | Zfp689        | NM_175163    | 0.0014472    | 1.27672 | E11.5 * Sox10 up vs E11.5 * Ctrl |
| 10597354 | Pdcd6ip       | NM_011052    | 0.000207217  | 1.27651 | E11.5 * Sox10 up vs E11.5 * Ctrl |
| 10546853 | Srgap3        | NM_080448    | 0.000883144  | 1.27629 | E11.5 * Sox10 up vs E11.5 * Ctrl |
| 10411899 | 2410002O22Rik | NM_025879    | 0.00195308   | 1.27628 | E11.5 * Sox10 up vs E11.5 * Ctrl |
| 10514732 | Slc35d1       | NM_177732    | 0.00463961   | 1.276   | E11.5 * Sox10 up vs E11.5 * Ctrl |
| 10488912 | Edem2         | NM_145537    | 0.00262922   | 1.2759  | E11.5 * Sox10 up vs E11.5 * Ctrl |
| 10483648 | Ola1          | NM_025942    | 0.00276323   | 1.2756  | E11.5 * Sox10 up vs E11.5 * Ctrl |
| 10360076 | Ndufs2        | NM_153064    | 0.000354212  | 1.27552 | E11.5 * Sox10 up vs E11.5 * Ctrl |
| 10476582 | MacroD2       | NM_028387    | 3.12444e-005 | 1.27539 | E11.5 * Sox10 up vs E11.5 * Ctrl |
| 10575476 | Vac14         | NM_146216    | 0.0011438    | 1.2753  | E11.5 * Sox10 up vs E11.5 * Ctrl |
| 10574676 | Nol3          | NM_030152    | 0.00362242   | 1.27517 | E11.5 * Sox10 up vs E11.5 * Ctrl |
| 10575630 | Cntnap4       | NM_130457    | 0.00830704   | 1.27516 | E11.5 * Sox10 up vs E11.5 * Ctrl |
| 10359677 | Blzf1         | NM_025505    | 0.00714897   | 1.27515 | E11.5 * Sox10 up vs E11.5 * Ctrl |
| 10505132 | Akap2         | NM_001035533 | 9.70454e-005 | 1.27511 | E11.5 * Sox10 up vs E11.5 * Ctrl |
| 10373454 | Pa2g4         | NM_011119    | 0.000104024  | 1.27495 | E11.5 * Sox10 up vs E11.5 * Ctrl |
| 10369877 | Ube2d1        | NM_145420    | 0.000203997  | 1.27479 | E11.5 * Sox10 up vs E11.5 * Ctrl |
| 10533729 | Vps37b        | NM_177876    | 0.00519266   | 1.27468 | E11.5 * Sox10 up vs E11.5 * Ctrl |
| 10433219 | Nat15         | NM_029090    | 0.00119227   | 1.27468 | E11.5 * Sox10 up vs E11.5 * Ctrl |
| 10475708 | Blvra         | NM_026678    | 0.00117642   | 1.2744  | E11.5 * Sox10 up vs E11.5 * Ctrl |
| 10516894 | Rcc1          | NM_133878    | 0.0050898    | 1.27438 | E11.5 * Sox10 up vs E11.5 * Ctrl |
| 10477897 | Dlgap4        | NM_146128    | 8.17523e-008 | 1.27438 | E11.5 * Sox10 up vs E11.5 * Ctrl |
| 10597871 | Higd1a        | NM_019814    | 0.00474119   | 1.27413 | E11.5 * Sox10 up vs E11.5 * Ctrl |
| 10483770 | Lnp           | NM_001110209 | 0.00313357   | 1.274   | E11.5 * Sox10 up vs E11.5 * Ctrl |
| 10407955 | Epdr1         | NM_134065    | 0.00805194   | 1.27389 | E11.5 * Sox10 up vs E11.5 * Ctrl |
| 10446074 | Uhrf1         | NM_010931    | 0.00349185   | 1.27377 | E11.5 * Sox10 up vs E11.5 * Ctrl |
| 10413250 | Cphx          | NM_175342    | 0.00974324   | 1.27372 | E11.5 * Sox10 up vs E11.5 * Ctrl |
| 10500054 | Psmd4         | NM_008951    | 0.00299412   | 1.27334 | E11.5 * Sox10 up vs E11.5 * Ctrl |
| 10481453 | Dolk          | NM_177648    | 0.00343957   | 1.27324 | E11.5 * Sox10 up vs E11.5 * Ctrl |
| 10349512 | Ubxn4         | NM_026390    | 2.77372e-006 | 1.27322 | E11.5 * Sox10 up vs E11.5 * Ctrl |
| 10545450 | Tgoln1        | NM_009443    | 0.000163796  | 1.27311 | E11.5 * Sox10 up vs E11.5 * Ctrl |
| 10392936 | Nt5c          | NM_015807    | 0.00018871   | 1.273   | E11.5 * Sox10 up vs E11.5 * Ctrl |
| 10441342 | 1810020G14Rik | ENSMUST00000 | 0.00149995   | 1.27295 | E11.5 * Sox10 up vs E11.5 * Ctrl |
| 10604451 | Enox2         | NM_145951    | 0.000487012  | 1.27274 | E11.5 * Sox10 up vs E11.5 * Ctrl |
| 10369761 | Reep3         | NM_178606    | 0.000134516  | 1.2725  | E11.5 * Sox10 up vs E11.5 * Ctrl |
| 10411332 | Hmgcr         | NM_008255    | 0.00889933   | 1.27236 | E11.5 * Sox10 up vs E11.5 * Ctrl |
| 10469581 | Etl4          | NM_001081006 | 0.000111259  | 1.27228 | E11.5 * Sox10 up vs E11.5 * Ctrl |
| 10380660 | Hoxb2         | NM_134032    | 0.00275338   | 1.27173 | E11.5 * Sox10 up vs E11.5 * Ctrl |
| 10449312 | ENSMUSG0000C  | NM_001122657 | 0.00261957   | 1.2717  | E11.5 * Sox10 up vs E11.5 * Ctrl |
| 10396161 | Tmx1          | NM_028339    | 0.00285403   | 1.27145 | E11.5 * Sox10 up vs E11.5 * Ctrl |
| 10415159 | Thtpa         | NM_153083    | 0.00210589   | 1.27125 | E11.5 * Sox10 up vs E11.5 * Ctrl |
| 10447551 | 5730437N04Rik | NM_027457    | 0.00843456   | 1.27084 | E11.5 * Sox10 up vs E11.5 * Ctrl |
| 10516778 | Zcchc17       | NM_153160    | 0.000959108  | 1.27082 | E11.5 * Sox10 up vs E11.5 * Ctrl |
| 10605740 | Elf2s3x       | NM_012010    | 0.000282726  | 1.27049 | E11.5 * Sox10 up vs E11.5 * Ctrl |
| 10535502 | Jtv1          | NM_146165    | 0.00180976   | 1.27048 | E11.5 * Sox10 up vs E11.5 * Ctrl |
| 10516678 | Kpna6         | NM_008468    | 0.00297421   | 1.27028 | E11.5 * Sox10 up vs E11.5 * Ctrl |
| 10603843 | Syn1          | NM_013680    | 0.0022122    | 1.27006 | E11.5 * Sox10 up vs E11.5 * Ctrl |
| 10591947 | Acad8         | NM_025862    | 8.44916e-005 | 1.26995 | E11.5 * Sox10 up vs E11.5 * Ctrl |
| 10456723 | BC031181      | BC016084     | 0.00354394   | 1.2699  | E11.5 * Sox10 up vs E11.5 * Ctrl |
| 10446334 | Glccl1        | NM_133236    | 0.00758387   | 1.26985 | E11.5 * Sox10 up vs E11.5 * Ctrl |
| 10520800 | Gpn1          | NM_133756    | 4.9598e-005  | 1.26957 | E11.5 * Sox10 up vs E11.5 * Ctrl |
| 10496621 | Gtf2b         | NM_145546    | 0.00123452   | 1.26941 | E11.5 * Sox10 up vs E11.5 * Ctrl |
| 10438478 | Abcc5         | NM_013790    | 8.17866e-005 | 1.26939 | E11.5 * Sox10 up vs E11.5 * Ctrl |
| 10582669 | Ttc13         | NM_145607    | 0.00019182   | 1.26922 | E11.5 * Sox10 up vs E11.5 * Ctrl |
| 10529313 | Letm1         | NM_019694    | 0.000346878  | 1.26894 | E11.5 * Sox10 up vs E11.5 * Ctrl |
| 10401181 | Rdh11         | NM_021557    | 0.00195899   | 1.26888 | E11.5 * Sox10 up vs E11.5 * Ctrl |
| 10436348 | Tomm70a       | NM_138599    | 0.000502468  | 1.26876 | E11.5 * Sox10 up vs E11.5 * Ctrl |
| 10454786 | Ctnna1        | NM_009818    | 0.000364425  | 1.26875 | E11.5 * Sox10 up vs E11.5 * Ctrl |
| 10409645 | Ubqln1        | NM_152234    | 5.98199e-006 | 1.26874 | E11.5 * Sox10 up vs E11.5 * Ctrl |
| 10376094 | ---           | ---          | 0.000163465  | 1.26837 | E11.5 * Sox10 up vs E11.5 * Ctrl |
| 10401136 | EG230765      | XR_032827    | 0.0015309    | 1.26836 | E11.5 * Sox10 up vs E11.5 * Ctrl |
| 10542445 | Strap         | NM_011499    | 1.81511e-006 | 1.26823 | E11.5 * Sox10 up vs E11.5 * Ctrl |
| 10430593 | Josd1         | NM_028792    | 0.00115772   | 1.26821 | E11.5 * Sox10 up vs E11.5 * Ctrl |
| 10547758 | Emg1          | NM_013536    | 0.000232915  | 1.26818 | E11.5 * Sox10 up vs E11.5 * Ctrl |

|          |               |               |              |         |                                  |
|----------|---------------|---------------|--------------|---------|----------------------------------|
| 10577623 | Gins4         | NM_024240     | 0.00529766   | 1.26812 | E11.5 * Sox10 up vs E11.5 * Ctrl |
| 10375290 | Slu7          | NM_148673     | 0.00109318   | 1.268   | E11.5 * Sox10 up vs E11.5 * Ctrl |
| 10525751 | Ddx55         | NM_026409     | 0.00219748   | 1.26796 | E11.5 * Sox10 up vs E11.5 * Ctrl |
| 10373313 | Nab2          | NM_008668     | 0.00941156   | 1.2678  | E11.5 * Sox10 up vs E11.5 * Ctrl |
| 10419810 | Psmb5         | NM_011186     | 0.000318303  | 1.26778 | E11.5 * Sox10 up vs E11.5 * Ctrl |
| 10514366 | Glr3          | NM_023140     | 0.00908165   | 1.26776 | E11.5 * Sox10 up vs E11.5 * Ctrl |
| 10461164 | Wdr74         | NM_134139     | 0.00266838   | 1.26773 | E11.5 * Sox10 up vs E11.5 * Ctrl |
| 10525726 | 2810006K23Rik | NM_028310     | 0.00656742   | 1.26766 | E11.5 * Sox10 up vs E11.5 * Ctrl |
| 10499705 | Hax1          | NM_011826     | 0.00013394   | 1.26762 | E11.5 * Sox10 up vs E11.5 * Ctrl |
| 10460631 | Rela          | NM_009045     | 0.00283761   | 1.26758 | E11.5 * Sox10 up vs E11.5 * Ctrl |
| 10545576 | Mrpl19        | NM_026490     | 0.00269636   | 1.26752 | E11.5 * Sox10 up vs E11.5 * Ctrl |
| 10534021 | Rimbp2        | NM_001081388  | 1.39944e-005 | 1.2675  | E11.5 * Sox10 up vs E11.5 * Ctrl |
| 10475264 | Ccndbp1       | NM_010761     | 0.00554979   | 1.26744 | E11.5 * Sox10 up vs E11.5 * Ctrl |
| 10393320 | Ube2o         | NM_173755     | 0.000475813  | 1.26735 | E11.5 * Sox10 up vs E11.5 * Ctrl |
| 10585721 | Scamp2        | NM_022813     | 0.00234466   | 1.26707 | E11.5 * Sox10 up vs E11.5 * Ctrl |
| 10421012 | Ppp2r2a       | NM_028032     | 2.2594e-005  | 1.26693 | E11.5 * Sox10 up vs E11.5 * Ctrl |
| 10573401 | Trmt1         | NM_198020     | 0.000675789  | 1.26675 | E11.5 * Sox10 up vs E11.5 * Ctrl |
| 10406245 | ---           | ---           | 9.06346e-005 | 1.2666  | E11.5 * Sox10 up vs E11.5 * Ctrl |
| 10543118 | Glici1        | NM_133236     | 0.00160038   | 1.26626 | E11.5 * Sox10 up vs E11.5 * Ctrl |
| 10578746 | BC088983      | BC088983      | 0.00537876   | 1.26619 | E11.5 * Sox10 up vs E11.5 * Ctrl |
| 10512884 | ---           | ---           | 0.00487211   | 1.26618 | E11.5 * Sox10 up vs E11.5 * Ctrl |
| 10593842 | Tspan3        | NM_019793     | 2.50136e-006 | 1.26596 | E11.5 * Sox10 up vs E11.5 * Ctrl |
| 10395074 | Myt1l         | NM_001093775  | 0.000157295  | 1.26592 | E11.5 * Sox10 up vs E11.5 * Ctrl |
| 10417053 | Mbnl2         | NM_175341     | 0.000122948  | 1.26583 | E11.5 * Sox10 up vs E11.5 * Ctrl |
| 10558740 | OTTMUSG00000  | XM_001480612  | 0.00467714   | 1.2657  | E11.5 * Sox10 up vs E11.5 * Ctrl |
| 10606868 | Bex1          | NM_009052     | 0.00645975   | 1.26553 | E11.5 * Sox10 up vs E11.5 * Ctrl |
| 10474870 | Rpusd2        | NM_173450     | 0.000294185  | 1.26527 | E11.5 * Sox10 up vs E11.5 * Ctrl |
| 10496475 | Adh5          | NM_007410     | 9.9408e-008  | 1.2652  | E11.5 * Sox10 up vs E11.5 * Ctrl |
| 10478938 | Hax1          | NM_011826     | 2.81963e-005 | 1.26516 | E11.5 * Sox10 up vs E11.5 * Ctrl |
| 10501397 | Tmem167b      | NM_026198     | 0.00602929   | 1.26448 | E11.5 * Sox10 up vs E11.5 * Ctrl |
| 10527268 | Pms2          | NM_008886     | 0.00981387   | 1.26447 | E11.5 * Sox10 up vs E11.5 * Ctrl |
| 10585860 | Adpgk         | NM_028121     | 0.00239783   | 1.26407 | E11.5 * Sox10 up vs E11.5 * Ctrl |
| 10388492 | Vps53         | NM_026664     | 2.61835e-005 | 1.26351 | E11.5 * Sox10 up vs E11.5 * Ctrl |
| 10581926 | Adat1         | NM_013925     | 0.00870402   | 1.26339 | E11.5 * Sox10 up vs E11.5 * Ctrl |
| 10423346 | Zfp622        | NM_144523     | 0.000196974  | 1.26333 | E11.5 * Sox10 up vs E11.5 * Ctrl |
| 10369086 | Gopc          | NM_053187     | 7.42835e-006 | 1.26305 | E11.5 * Sox10 up vs E11.5 * Ctrl |
| 10438603 | Igf2bp2       | NM_183029     | 0.00242727   | 1.26301 | E11.5 * Sox10 up vs E11.5 * Ctrl |
| 10433691 | Ntan1         | NM_010946     | 0.000286329  | 1.26298 | E11.5 * Sox10 up vs E11.5 * Ctrl |
| 10456021 | Camk2a        | NM_177407     | 0.00294793   | 1.26293 | E11.5 * Sox10 up vs E11.5 * Ctrl |
| 10433953 | Ypel1         | NM_023249     | 0.00167003   | 1.26285 | E11.5 * Sox10 up vs E11.5 * Ctrl |
| 10539159 | Suc1g1        | NM_019879     | 0.00288863   | 1.26281 | E11.5 * Sox10 up vs E11.5 * Ctrl |
| 10522661 | C530008M17Rik | AK122469      | 0.00529796   | 1.2628  | E11.5 * Sox10 up vs E11.5 * Ctrl |
| 10477012 | Fkbp1a        | NM_008019     | 0.000709567  | 1.26254 | E11.5 * Sox10 up vs E11.5 * Ctrl |
| 10496789 | Lpar3         | NM_022983     | 0.00108208   | 1.26252 | E11.5 * Sox10 up vs E11.5 * Ctrl |
| 10432492 | Faim2         | NM_028224     | 0.00930665   | 1.26246 | E11.5 * Sox10 up vs E11.5 * Ctrl |
| 10495869 | Tram1l1       | NM_146140     | 0.00447701   | 1.26235 | E11.5 * Sox10 up vs E11.5 * Ctrl |
| 10411782 | Pik3r1        | NM_001077495  | 0.000852626  | 1.26217 | E11.5 * Sox10 up vs E11.5 * Ctrl |
| 10446594 | ---           | ---           | 0.00834338   | 1.26175 | E11.5 * Sox10 up vs E11.5 * Ctrl |
| 10423333 | Fam134b       | NM_001034851  | 0.00282555   | 1.26163 | E11.5 * Sox10 up vs E11.5 * Ctrl |
| 10580986 | Rbmxt1        | NM_009033     | 0.000549812  | 1.26157 | E11.5 * Sox10 up vs E11.5 * Ctrl |
| 10485294 | Hsd17b12      | NM_019657     | 0.00781612   | 1.26126 | E11.5 * Sox10 up vs E11.5 * Ctrl |
| 10490569 | Kcnq2         | NM_010611     | 0.000999152  | 1.26113 | E11.5 * Sox10 up vs E11.5 * Ctrl |
| 10577560 | Ikbkb         | NM_010546     | 0.000105397  | 1.26108 | E11.5 * Sox10 up vs E11.5 * Ctrl |
| 10379410 | Rhot1         | NM_021536     | 0.000725791  | 1.26094 | E11.5 * Sox10 up vs E11.5 * Ctrl |
| 10384885 | Spnb2         | NM_175836     | 4.11218e-005 | 1.26077 | E11.5 * Sox10 up vs E11.5 * Ctrl |
| 10568099 | Tmem219       | NM_026827     | 0.00207008   | 1.26075 | E11.5 * Sox10 up vs E11.5 * Ctrl |
| 10477187 | Tpx2          | NM_001141977  | 0.00120432   | 1.26066 | E11.5 * Sox10 up vs E11.5 * Ctrl |
| 10542824 | Mrps35        | NM_145573     | 0.0062915    | 1.26032 | E11.5 * Sox10 up vs E11.5 * Ctrl |
| 10453512 | Kpna2         | NM_010655     | 0.000626449  | 1.26023 | E11.5 * Sox10 up vs E11.5 * Ctrl |
| 10603618 | ---           | ---           | 0.00824293   | 1.26023 | E11.5 * Sox10 up vs E11.5 * Ctrl |
| 10497503 | Kpna2         | NM_010655     | 0.000342172  | 1.2602  | E11.5 * Sox10 up vs E11.5 * Ctrl |
| 10379564 | Lig3          | NM_010716     | 0.000446365  | 1.26019 | E11.5 * Sox10 up vs E11.5 * Ctrl |
| 10467766 | Loxl4         | ENSMUST000001 | 0.00669005   | 1.2599  | E11.5 * Sox10 up vs E11.5 * Ctrl |
| 10531899 | Klhl8         | NM_178741     | 0.00269519   | 1.25977 | E11.5 * Sox10 up vs E11.5 * Ctrl |
| 10376959 | Elac2         | NM_023479     | 0.00196484   | 1.25973 | E11.5 * Sox10 up vs E11.5 * Ctrl |
| 10585022 | Zfp259        | NM_011752     | 0.000828222  | 1.25953 | E11.5 * Sox10 up vs E11.5 * Ctrl |

|          |               |              |              |         |                                  |
|----------|---------------|--------------|--------------|---------|----------------------------------|
| 10544243 | Mrps33        | NM_010270    | 0.000615856  | 1.25951 | E11.5 * Sox10 up vs E11.5 * Ctrl |
| 10401968 | Galc          | NM_008079    | 0.00854687   | 1.25931 | E11.5 * Sox10 up vs E11.5 * Ctrl |
| 10445229 | ---           | ---          | 0.00860991   | 1.25913 | E11.5 * Sox10 up vs E11.5 * Ctrl |
| 10386359 | Guk1          | NM_008193    | 0.00878249   | 1.25901 | E11.5 * Sox10 up vs E11.5 * Ctrl |
| 10605659 | OTTMUSG00000  | ENSMUST00000 | 0.00781063   | 1.25883 | E11.5 * Sox10 up vs E11.5 * Ctrl |
| 10594988 | Mapk6         | NM_015806    | 7.13772e-006 | 1.2588  | E11.5 * Sox10 up vs E11.5 * Ctrl |
| 10571288 | Gtf2e2        | NM_026584    | 7.57806e-005 | 1.25875 | E11.5 * Sox10 up vs E11.5 * Ctrl |
| 10420730 | Fdft1         | NM_010191    | 0.00126479   | 1.25874 | E11.5 * Sox10 up vs E11.5 * Ctrl |
| 10521163 | Gm1673        | BC147444     | 0.00271232   | 1.25851 | E11.5 * Sox10 up vs E11.5 * Ctrl |
| 10373027 | Tspan31       | NM_025982    | 0.00134806   | 1.2585  | E11.5 * Sox10 up vs E11.5 * Ctrl |
| 10452000 | Dpp9          | NM_172624    | 0.00453062   | 1.25842 | E11.5 * Sox10 up vs E11.5 * Ctrl |
| 10442435 | Rnps1         | NM_009070    | 0.0025753    | 1.25771 | E11.5 * Sox10 up vs E11.5 * Ctrl |
| 10355454 | EG383528      | XR_033954    | 0.00611633   | 1.25727 | E11.5 * Sox10 up vs E11.5 * Ctrl |
| 10345666 | Pdcl3         | NM_026850    | 0.000472846  | 1.25704 | E11.5 * Sox10 up vs E11.5 * Ctrl |
| 10458213 | Etf1          | NM_144866    | 3.38144e-005 | 1.25694 | E11.5 * Sox10 up vs E11.5 * Ctrl |
| 10532892 | 1500011B03Rik | ENSMUST00000 | 5.50155e-005 | 1.25691 | E11.5 * Sox10 up vs E11.5 * Ctrl |
| 10402519 | Atg2b         | NM_029654    | 0.000232022  | 1.25688 | E11.5 * Sox10 up vs E11.5 * Ctrl |
| 10560315 | Ppp5c         | NM_011155    | 0.00633697   | 1.25682 | E11.5 * Sox10 up vs E11.5 * Ctrl |
| 10468309 | 2310014D11Rik | AK009333     | 0.00277444   | 1.25665 | E11.5 * Sox10 up vs E11.5 * Ctrl |
| 10496110 | Papss1        | NM_011863    | 0.00547959   | 1.25657 | E11.5 * Sox10 up vs E11.5 * Ctrl |
| 10517488 | Ephb2         | NM_010142    | 0.00473602   | 1.25655 | E11.5 * Sox10 up vs E11.5 * Ctrl |
| 10374348 | OTTMUSG00000  | XR_032931    | 0.000424302  | 1.25645 | E11.5 * Sox10 up vs E11.5 * Ctrl |
| 10575184 | Wwp2          | NM_025830    | 0.00552691   | 1.25644 | E11.5 * Sox10 up vs E11.5 * Ctrl |
| 10525296 | Brap          | NM_028227    | 0.000132706  | 1.25633 | E11.5 * Sox10 up vs E11.5 * Ctrl |
| 10391768 | Eftud2        | NM_011431    | 0.00292225   | 1.25621 | E11.5 * Sox10 up vs E11.5 * Ctrl |
| 10433264 | Glis2         | NM_031184    | 0.00199222   | 1.25601 | E11.5 * Sox10 up vs E11.5 * Ctrl |
| 10542200 | Gabarapl1     | NM_020590    | 0.00145877   | 1.25561 | E11.5 * Sox10 up vs E11.5 * Ctrl |
| 10521927 | Tbc1d19       | NM_144517    | 0.0011048    | 1.25561 | E11.5 * Sox10 up vs E11.5 * Ctrl |
| 10368782 | Fig4          | NM_133999    | 0.00658677   | 1.25554 | E11.5 * Sox10 up vs E11.5 * Ctrl |
| 10539861 | Rpn1          | NM_133933    | 9.84185e-005 | 1.25552 | E11.5 * Sox10 up vs E11.5 * Ctrl |
| 10591357 | Elf3g         | NM_016876    | 0.0018296    | 1.25533 | E11.5 * Sox10 up vs E11.5 * Ctrl |
| 10508420 | Yars          | NM_134151    | 0.00478855   | 1.25525 | E11.5 * Sox10 up vs E11.5 * Ctrl |
| 10404578 | Cdyl          | NM_009881    | 0.000460878  | 1.25513 | E11.5 * Sox10 up vs E11.5 * Ctrl |
| 10418053 | Kcnma1        | NM_010610    | 0.00476005   | 1.25494 | E11.5 * Sox10 up vs E11.5 * Ctrl |
| 10399228 | EG627245      | XR_034503    | 0.00772107   | 1.25485 | E11.5 * Sox10 up vs E11.5 * Ctrl |
| 10419216 | Gnpnat1       | NM_019425    | 0.00343342   | 1.25481 | E11.5 * Sox10 up vs E11.5 * Ctrl |
| 10571653 | Actg1         | NM_009609    | 1.30496e-005 | 1.25481 | E11.5 * Sox10 up vs E11.5 * Ctrl |
| 10459730 | Me2           | NM_145494    | 0.00125586   | 1.25466 | E11.5 * Sox10 up vs E11.5 * Ctrl |
| 10461497 | Ddb1          | NM_015735    | 0.00203648   | 1.25464 | E11.5 * Sox10 up vs E11.5 * Ctrl |
| 10546805 | Ddx18         | NM_025860    | 0.00037506   | 1.25454 | E11.5 * Sox10 up vs E11.5 * Ctrl |
| 10541002 | D6Wsu116e     | BC056942     | 0.00046046   | 1.25447 | E11.5 * Sox10 up vs E11.5 * Ctrl |
| 10363392 | Dnajb12       | NM_019965    | 0.00383655   | 1.25446 | E11.5 * Sox10 up vs E11.5 * Ctrl |
| 10598882 | Uba1          | NM_009457    | 2.56048e-006 | 1.25446 | E11.5 * Sox10 up vs E11.5 * Ctrl |
| 10380238 | Mrps23        | NM_024174    | 0.00572793   | 1.25428 | E11.5 * Sox10 up vs E11.5 * Ctrl |
| 10503915 | Chchd2        | NM_024166    | 0.00912902   | 1.25417 | E11.5 * Sox10 up vs E11.5 * Ctrl |
| 10347106 | Rpe           | NM_025683    | 0.000314373  | 1.25405 | E11.5 * Sox10 up vs E11.5 * Ctrl |
| 10434643 | Psmb3         | NM_011971    | 0.000341414  | 1.25399 | E11.5 * Sox10 up vs E11.5 * Ctrl |
| 10422608 | Oxct1         | NM_024188    | 4.03474e-007 | 1.25391 | E11.5 * Sox10 up vs E11.5 * Ctrl |
| 10437765 | Cpped1        | NM_146067    | 0.00977126   | 1.25376 | E11.5 * Sox10 up vs E11.5 * Ctrl |
| 10446596 | Dlgap1        | NM_177639    | 0.00797795   | 1.25339 | E11.5 * Sox10 up vs E11.5 * Ctrl |
| 10411199 | Aggf1         | NM_025630    | 0.00218986   | 1.25325 | E11.5 * Sox10 up vs E11.5 * Ctrl |
| 10349249 | Clasp1        | NM_001081276 | 0.000797067  | 1.25325 | E11.5 * Sox10 up vs E11.5 * Ctrl |
| 10431113 | Sult4a1       | NM_013873    | 0.00975701   | 1.25323 | E11.5 * Sox10 up vs E11.5 * Ctrl |
| 10511661 | Otud6b        | NM_152812    | 0.000879895  | 1.25227 | E11.5 * Sox10 up vs E11.5 * Ctrl |
| 10588669 | Rassf1        | NM_019713    | 0.00857958   | 1.25225 | E11.5 * Sox10 up vs E11.5 * Ctrl |
| 10388971 | Utp6          | NM_144826    | 9.15848e-005 | 1.25223 | E11.5 * Sox10 up vs E11.5 * Ctrl |
| 10458913 | Cep120        | NM_178686    | 0.000963397  | 1.25223 | E11.5 * Sox10 up vs E11.5 * Ctrl |
| 10511580 | Ppm2c         | NM_001098230 | 0.00085862   | 1.25208 | E11.5 * Sox10 up vs E11.5 * Ctrl |
| 10514221 | Adfp          | NM_007408    | 0.00143595   | 1.25184 | E11.5 * Sox10 up vs E11.5 * Ctrl |
| 10418171 | Zcchc24       | NM_001101433 | 0.00253261   | 1.25183 | E11.5 * Sox10 up vs E11.5 * Ctrl |
| 10412913 | EG667344      | XR_031629    | 0.00701744   | 1.25179 | E11.5 * Sox10 up vs E11.5 * Ctrl |
| 10434029 | Lztr1         | NM_025808    | 0.00166298   | 1.25147 | E11.5 * Sox10 up vs E11.5 * Ctrl |
| 10591009 | Med17         | NM_144933    | 0.000420867  | 1.2511  | E11.5 * Sox10 up vs E11.5 * Ctrl |
| 10526381 | Mdh2          | NM_008617    | 0.000811908  | 1.251   | E11.5 * Sox10 up vs E11.5 * Ctrl |
| 10569203 | Chid1         | NM_001142681 | 0.00289199   | 1.25092 | E11.5 * Sox10 up vs E11.5 * Ctrl |
| 10366310 | Osbpl8        | NM_175489    | 0.00868794   | 1.25083 | E11.5 * Sox10 up vs E11.5 * Ctrl |

|          |               |              |              |         |                                  |
|----------|---------------|--------------|--------------|---------|----------------------------------|
| 10465625 | Otub1         | NM_134150    | 0.00503153   | 1.25058 | E11.5 * Sox10 up vs E11.5 * Ctrl |
| 10560260 | Sae1          | NM_019748    | 0.00422845   | 1.25052 | E11.5 * Sox10 up vs E11.5 * Ctrl |
| 10517421 | Pnrc2         | NM_026383    | 0.00011697   | 1.2505  | E11.5 * Sox10 up vs E11.5 * Ctrl |
| 10384123 | Ddx56         | NM_026538    | 0.000794049  | 1.25031 | E11.5 * Sox10 up vs E11.5 * Ctrl |
| 10422628 | Plcxd3        | NM_177355    | 0.00356459   | 1.25031 | E11.5 * Sox10 up vs E11.5 * Ctrl |
| 10392070 | Strada        | NM_028126    | 0.00378999   | 1.25009 | E11.5 * Sox10 up vs E11.5 * Ctrl |
| 10434869 | Ccdc50        | NM_026202    | 4.49017e-005 | 1.25004 | E11.5 * Sox10 up vs E11.5 * Ctrl |
| 10439936 | Nfkbiz        | NM_030612    | 0.000952646  | 1.24983 | E11.5 * Sox10 up vs E11.5 * Ctrl |
| 10484563 | Olfr1043      | NM_146577    | 0.00579745   | 1.24978 | E11.5 * Sox10 up vs E11.5 * Ctrl |
| 10397891 | D230037D09Rik | NM_177140    | 0.00420472   | 1.24964 | E11.5 * Sox10 up vs E11.5 * Ctrl |
| 10503911 | Polr1d        | NM_181730    | 2.26608e-005 | 1.24962 | E11.5 * Sox10 up vs E11.5 * Ctrl |
| 10349771 | EG638532      | XM_914588    | 0.00818573   | 1.24957 | E11.5 * Sox10 up vs E11.5 * Ctrl |
| 10379075 | 2610507B11Rik | NM_001002004 | 2.12902e-005 | 1.2494  | E11.5 * Sox10 up vs E11.5 * Ctrl |
| 10398483 | Dync1h1       | NM_030238    | 0.000503243  | 1.24927 | E11.5 * Sox10 up vs E11.5 * Ctrl |
| 10441511 |               |              | 0.0013476    | 1.24925 | E11.5 * Sox10 up vs E11.5 * Ctrl |
| 10388786 | Supt6h        | NM_009297    | 6.05931e-005 | 1.2492  | E11.5 * Sox10 up vs E11.5 * Ctrl |
| 10550098 | Wdr12         | NM_021312    | 0.00118963   | 1.24913 | E11.5 * Sox10 up vs E11.5 * Ctrl |
| 10477370 | Tomm20        | NM_024214    | 0.00387877   | 1.24898 | E11.5 * Sox10 up vs E11.5 * Ctrl |
| 10346810 | Pard3b        | NM_001081050 | 0.00443943   | 1.24893 | E11.5 * Sox10 up vs E11.5 * Ctrl |
| 10599612 | Phf6          | NM_027642    | 0.000899547  | 1.24891 | E11.5 * Sox10 up vs E11.5 * Ctrl |
| 10437311 | Trap1         | NM_026508    | 0.000282693  | 1.2489  | E11.5 * Sox10 up vs E11.5 * Ctrl |
| 10348817 | 02-Sep        | NM_001159719 | 0.0003628    | 1.24874 | E11.5 * Sox10 up vs E11.5 * Ctrl |
| 10438098 | Sdf2l1        | NM_022324    | 0.00338504   | 1.24863 | E11.5 * Sox10 up vs E11.5 * Ctrl |
| 10525766 | Gtf2h3        | NM_181410    | 0.00831563   | 1.24829 | E11.5 * Sox10 up vs E11.5 * Ctrl |
| 10478341 | Ift52         | NM_172150    | 0.000170236  | 1.24825 | E11.5 * Sox10 up vs E11.5 * Ctrl |
| 10468231 | Arl3          | NM_019718    | 0.000324989  | 1.24784 | E11.5 * Sox10 up vs E11.5 * Ctrl |
| 10459837 | 8030462N17Rik | NM_178670    | 0.00482896   | 1.24775 | E11.5 * Sox10 up vs E11.5 * Ctrl |
| 10491977 | 2810046L04Rik | NM_173382    | 0.005143     | 1.24729 | E11.5 * Sox10 up vs E11.5 * Ctrl |
| 10543080 | Rnps1         | NM_009070    | 0.00476488   | 1.24717 | E11.5 * Sox10 up vs E11.5 * Ctrl |
| 10453792 | Thoc1         | BC024951     | 0.00350905   | 1.24717 | E11.5 * Sox10 up vs E11.5 * Ctrl |
| 10590343 | Trak1         | NM_175114    | 0.0093124    | 1.24715 | E11.5 * Sox10 up vs E11.5 * Ctrl |
| 10358191 | Camsap1l1     | NM_001081360 | 1.11874e-005 | 1.24676 | E11.5 * Sox10 up vs E11.5 * Ctrl |
| 10592891 | Phldb1        | NM_153537    | 0.00367356   | 1.24672 | E11.5 * Sox10 up vs E11.5 * Ctrl |
| 10507933 | Inpp5b        | NM_008385    | 0.000342558  | 1.24645 | E11.5 * Sox10 up vs E11.5 * Ctrl |
| 10513397 | 1110054O05Rik | NM_001013577 | 0.000122214  | 1.24639 | E11.5 * Sox10 up vs E11.5 * Ctrl |
| 10532538 | Asphd2        | NM_028386    | 0.00941337   | 1.24624 | E11.5 * Sox10 up vs E11.5 * Ctrl |
| 10440037 | Nit2          | NM_023175    | 0.00832288   | 1.24615 | E11.5 * Sox10 up vs E11.5 * Ctrl |
| 10500295 | Plekho1       | NM_023320    | 0.00116401   | 1.24606 | E11.5 * Sox10 up vs E11.5 * Ctrl |
| 10448064 | Prdm9         | NM_144809    | 0.00256943   | 1.24575 | E11.5 * Sox10 up vs E11.5 * Ctrl |
| 10360225 | Timm23        | NM_016897    | 1.55106e-005 | 1.24558 | E11.5 * Sox10 up vs E11.5 * Ctrl |
| 10416069 | Timm23        | NM_016897    | 1.55106e-005 | 1.24558 | E11.5 * Sox10 up vs E11.5 * Ctrl |
| 10526193 | ---           |              | 0.00353916   | 1.24533 | E11.5 * Sox10 up vs E11.5 * Ctrl |
| 10472764 | Dync1i2       | NM_010064    | 0.000100727  | 1.24513 | E11.5 * Sox10 up vs E11.5 * Ctrl |
| 10486712 | Zscan29       | ENSMUST00000 | 0.0104105    | 1.24506 | E11.5 * Sox10 up vs E11.5 * Ctrl |
| 10401805 | Snw1          | NM_025507    | 1.91871e-005 | 1.24499 | E11.5 * Sox10 up vs E11.5 * Ctrl |
| 10467470 | Aldh18a1      | NM_019698    | 0.0009802    | 1.2448  | E11.5 * Sox10 up vs E11.5 * Ctrl |
| 10423512 | Fam173b       | NM_026546    | 0.000671805  | 1.2444  | E11.5 * Sox10 up vs E11.5 * Ctrl |
| 10467941 | Cwf19l1       | NM_001081077 | 0.00191185   | 1.24433 | E11.5 * Sox10 up vs E11.5 * Ctrl |
| 10566405 | Mapksp1       | NM_019920    | 0.00128925   | 1.2441  | E11.5 * Sox10 up vs E11.5 * Ctrl |
| 10345913 | Nck2          | NM_010879    | 0.00136864   | 1.24408 | E11.5 * Sox10 up vs E11.5 * Ctrl |
| 10576934 | Fam155a       | NM_173446    | 0.00799635   | 1.24401 | E11.5 * Sox10 up vs E11.5 * Ctrl |
| 10449386 | D17Wsu92e     | NM_001033279 | 0.000163671  | 1.24385 | E11.5 * Sox10 up vs E11.5 * Ctrl |
| 10563829 | Mrps33        | NM_010270    | 0.000666248  | 1.24371 | E11.5 * Sox10 up vs E11.5 * Ctrl |
| 10504450 | Glipr2        | NM_027450    | 0.000399967  | 1.24361 | E11.5 * Sox10 up vs E11.5 * Ctrl |
| 10605831 | Las1l         | NM_152822    | 0.000267744  | 1.24354 | E11.5 * Sox10 up vs E11.5 * Ctrl |
| 10536176 | Ccdc132       | NM_024260    | 0.00620701   | 1.24314 | E11.5 * Sox10 up vs E11.5 * Ctrl |
| 10583647 | Dnm2          | NM_001039520 | 0.00216488   | 1.24295 | E11.5 * Sox10 up vs E11.5 * Ctrl |
| 10511069 | Gnb1          | NM_008142    | 0.000152495  | 1.24222 | E11.5 * Sox10 up vs E11.5 * Ctrl |
| 10558090 | Tacc2         | NM_001004468 | 0.000602726  | 1.24203 | E11.5 * Sox10 up vs E11.5 * Ctrl |
| 10503448 | Mmp16         | NM_019724    | 0.00026499   | 1.24203 | E11.5 * Sox10 up vs E11.5 * Ctrl |
| 10539669 | Add2          | NM_013458    | 0.000219602  | 1.24195 | E11.5 * Sox10 up vs E11.5 * Ctrl |
| 10378334 | Tax1bp3       | NM_029564    | 0.000272767  | 1.24184 | E11.5 * Sox10 up vs E11.5 * Ctrl |
| 10369604 | Vps26a        | NM_133672    | 0.00193191   | 1.24178 | E11.5 * Sox10 up vs E11.5 * Ctrl |
| 10354832 | Ppil3         | NM_027351    | 0.000260508  | 1.24135 | E11.5 * Sox10 up vs E11.5 * Ctrl |
| 10354792 | 1110034B05Rik | NR_004860    | 0.00237949   | 1.24124 | E11.5 * Sox10 up vs E11.5 * Ctrl |
| 10597531 | Rbms3         | NM_178660    | 9.80194e-005 | 1.24119 | E11.5 * Sox10 up vs E11.5 * Ctrl |

|          |               |              |              |         |                                  |
|----------|---------------|--------------|--------------|---------|----------------------------------|
| 10578763 | Sap30         | NM_021788    | 5.25348e-005 | 1.24106 | E11.5 * Sox10 up vs E11.5 * Ctrl |
| 10515295 | Mast2         | NM_001042743 | 0.000154628  | 1.24094 | E11.5 * Sox10 up vs E11.5 * Ctrl |
| 10502440 |               | ---          | 0.010198     | 1.24092 | E11.5 * Sox10 up vs E11.5 * Ctrl |
| 10585610 | Ptpn9         | NM_019651    | 0.000168418  | 1.2407  | E11.5 * Sox10 up vs E11.5 * Ctrl |
| 10455801 | Phax          | NM_019996    | 8.12334e-005 | 1.24067 | E11.5 * Sox10 up vs E11.5 * Ctrl |
| 10533007 | Ccdc64        | NM_001080808 | 0.000405227  | 1.24042 | E11.5 * Sox10 up vs E11.5 * Ctrl |
| 10569163 | Cend1         | NM_021316    | 0.00921501   | 1.24024 | E11.5 * Sox10 up vs E11.5 * Ctrl |
| 10391577 | Hdac5         | NM_001077696 | 0.00534024   | 1.24021 | E11.5 * Sox10 up vs E11.5 * Ctrl |
| 10511311 | Tmem68        | NM_028097    | 0.00845077   | 1.24013 | E11.5 * Sox10 up vs E11.5 * Ctrl |
| 10496888 |               | ---          | 0.00886485   | 1.23983 | E11.5 * Sox10 up vs E11.5 * Ctrl |
| 10546396 | Mrps25        | NM_025578    | 0.00455402   | 1.23982 | E11.5 * Sox10 up vs E11.5 * Ctrl |
| 10407709 | Mtr           | NM_001081128 | 0.00754356   | 1.23976 | E11.5 * Sox10 up vs E11.5 * Ctrl |
| 10352066 | Sdccag8       | NM_029756    | 0.000738132  | 1.23974 | E11.5 * Sox10 up vs E11.5 * Ctrl |
| 10525542 | Bcl7a         | NM_029850    | 0.00961315   | 1.23968 | E11.5 * Sox10 up vs E11.5 * Ctrl |
| 10558903 | Taldo1        | NM_011528    | 0.00213054   | 1.2396  | E11.5 * Sox10 up vs E11.5 * Ctrl |
| 10372583 | Rab3ip        | NM_001003950 | 0.000196978  | 1.23914 | E11.5 * Sox10 up vs E11.5 * Ctrl |
| 10373873 | Sf3a1         | NM_026175    | 0.00687424   | 1.23907 | E11.5 * Sox10 up vs E11.5 * Ctrl |
| 10472994 | Mtx2          | NM_016804    | 8.02921e-005 | 1.23895 | E11.5 * Sox10 up vs E11.5 * Ctrl |
| 10562064 | Etv2          | NM_007959    | 0.00500841   | 1.23868 | E11.5 * Sox10 up vs E11.5 * Ctrl |
| 10356628 | Hdac4         | NM_207225    | 0.00491916   | 1.23863 | E11.5 * Sox10 up vs E11.5 * Ctrl |
| 10377987 | Rabep1        | NM_019400    | 8.42385e-006 | 1.23841 | E11.5 * Sox10 up vs E11.5 * Ctrl |
| 10424400 | Myc           | NM_010849    | 0.00798849   | 1.2383  | E11.5 * Sox10 up vs E11.5 * Ctrl |
| 10596137 | Srprb         | NM_009275    | 0.00260053   | 1.23808 | E11.5 * Sox10 up vs E11.5 * Ctrl |
| 10346533 | Nif3l1        | NM_022988    | 0.00213288   | 1.23798 | E11.5 * Sox10 up vs E11.5 * Ctrl |
| 10392098 | Ftsj3         | NM_025310    | 0.00102998   | 1.23793 | E11.5 * Sox10 up vs E11.5 * Ctrl |
| 10437586 | Tmem186       | NM_025708    | 0.00737279   | 1.23788 | E11.5 * Sox10 up vs E11.5 * Ctrl |
| 10545720 | Stambp        | NM_024239    | 0.00512483   | 1.23781 | E11.5 * Sox10 up vs E11.5 * Ctrl |
| 10530625 | OTTMUSG00000  | XR_034092    | 0.00350692   | 1.23768 | E11.5 * Sox10 up vs E11.5 * Ctrl |
| 10424411 | Tsg101        | NM_021884    | 0.000438502  | 1.23752 | E11.5 * Sox10 up vs E11.5 * Ctrl |
| 10578477 | Fam149a       | NM_153535    | 0.00312863   | 1.23737 | E11.5 * Sox10 up vs E11.5 * Ctrl |
| 10418796 | Dph3          | NM_172254    | 0.000215877  | 1.23733 | E11.5 * Sox10 up vs E11.5 * Ctrl |
| 10553301 | Ldha          | NM_010699    | 0.00470673   | 1.2371  | E11.5 * Sox10 up vs E11.5 * Ctrl |
| 10419223 | Fermt2        | NM_146054    | 0.000199127  | 1.23698 | E11.5 * Sox10 up vs E11.5 * Ctrl |
| 10465604 | Stip1         | NM_016737    | 0.000144133  | 1.23688 | E11.5 * Sox10 up vs E11.5 * Ctrl |
| 10567423 | Dcun1d3       | NM_173408    | 0.00116804   | 1.23683 | E11.5 * Sox10 up vs E11.5 * Ctrl |
| 10402835 | Nudt14        | NM_025399    | 0.00262339   | 1.23675 | E11.5 * Sox10 up vs E11.5 * Ctrl |
| 10494832 | 5730470L24Rik | NM_025679    | 0.000175736  | 1.23663 | E11.5 * Sox10 up vs E11.5 * Ctrl |
| 10526838 | Got2          | NM_010325    | 0.00122183   | 1.23661 | E11.5 * Sox10 up vs E11.5 * Ctrl |
| 10389164 | Pex12         | NM_134025    | 0.00301126   | 1.2365  | E11.5 * Sox10 up vs E11.5 * Ctrl |
| 10492078 | Alg5          | NM_025442    | 0.0011696    | 1.23648 | E11.5 * Sox10 up vs E11.5 * Ctrl |
| 10462724 | Tnks2         | ENSMUST00000 | 0.000140295  | 1.2363  | E11.5 * Sox10 up vs E11.5 * Ctrl |
| 10378668 | Pitpna        | NM_008850    | 9.06088e-006 | 1.2363  | E11.5 * Sox10 up vs E11.5 * Ctrl |
| 10546567 | A130022J15Rik | NM_175313    | 0.00525469   | 1.23604 | E11.5 * Sox10 up vs E11.5 * Ctrl |
| 10576373 | Gas8          | NM_018855    | 0.000107099  | 1.23595 | E11.5 * Sox10 up vs E11.5 * Ctrl |
| 10543650 | Tnpo3         | NM_177296    | 2.39839e-006 | 1.23591 | E11.5 * Sox10 up vs E11.5 * Ctrl |
| 10370025 | Smarb1        | NM_011418    | 0.000753061  | 1.2358  | E11.5 * Sox10 up vs E11.5 * Ctrl |
| 10589196 | Uqcr1         | NM_025407    | 0.00356663   | 1.2357  | E11.5 * Sox10 up vs E11.5 * Ctrl |
| 10389865 | Nme1          | NM_008704    | 7.64618e-006 | 1.23563 | E11.5 * Sox10 up vs E11.5 * Ctrl |
| 10454478 | Polr2d        | NM_027002    | 0.0074068    | 1.23538 | E11.5 * Sox10 up vs E11.5 * Ctrl |
| 10586017 | Uaca          | NM_028283    | 0.00255797   | 1.23523 | E11.5 * Sox10 up vs E11.5 * Ctrl |
| 10428238 | Ubr5          | NM_001081359 | 0.000209913  | 1.2351  | E11.5 * Sox10 up vs E11.5 * Ctrl |
| 10384603 | Mdh1          | NM_008618    | 3.29025e-005 | 1.23509 | E11.5 * Sox10 up vs E11.5 * Ctrl |
| 10467328 | 5730455O13Rik | NM_001081075 | 0.00332943   | 1.235   | E11.5 * Sox10 up vs E11.5 * Ctrl |
| 10522075 | Klhl5         | NM_175174    | 0.000549682  | 1.23467 | E11.5 * Sox10 up vs E11.5 * Ctrl |
| 10363000 | Gpx4          | NM_001037741 | 0.00184437   | 1.2346  | E11.5 * Sox10 up vs E11.5 * Ctrl |
| 10530310 | Bend4         | XM_001477289 | 0.00425748   | 1.23458 | E11.5 * Sox10 up vs E11.5 * Ctrl |
| 10521031 | Ywhah         | NM_011738    | 0.000615127  | 1.23431 | E11.5 * Sox10 up vs E11.5 * Ctrl |
| 10584535 | EG235279      | XR_034073    | 0.00572525   | 1.23419 | E11.5 * Sox10 up vs E11.5 * Ctrl |
| 10431726 | Yaf2          | NM_024189    | 0.000360677  | 1.23418 | E11.5 * Sox10 up vs E11.5 * Ctrl |
| 10447356 | Socs5         | NM_019654    | 0.0022666    | 1.23379 | E11.5 * Sox10 up vs E11.5 * Ctrl |
| 10425632 | Xrcc6         | NM_010247    | 0.00169381   | 1.23313 | E11.5 * Sox10 up vs E11.5 * Ctrl |
| 10403466 | Dip2c         | NM_001081426 | 0.00465258   | 1.23306 | E11.5 * Sox10 up vs E11.5 * Ctrl |
| 10561673 | Spred3        | NM_162927    | 0.00285682   | 1.23276 | E11.5 * Sox10 up vs E11.5 * Ctrl |
| 10350823 | Abl2          | NM_001136104 | 0.00247593   | 1.23275 | E11.5 * Sox10 up vs E11.5 * Ctrl |
| 10402096 | Ttc7b         | NM_001033213 | 0.001202     | 1.2327  | E11.5 * Sox10 up vs E11.5 * Ctrl |
| 10483381 | Stk39         | NM_016866    | 0.000204262  | 1.23266 | E11.5 * Sox10 up vs E11.5 * Ctrl |

|          |               |              |              |         |                                  |
|----------|---------------|--------------|--------------|---------|----------------------------------|
| 10358155 | 2310006M14Rik | AK009188     | 0.00970253   | 1.23264 | E11.5 * Sox10 up vs E11.5 * Ctrl |
| 10562096 | Tmem147       | NM_027215    | 0.00259651   | 1.23232 | E11.5 * Sox10 up vs E11.5 * Ctrl |
| 10582814 | Tomm20        | NM_024214    | 0.00227881   | 1.23227 | E11.5 * Sox10 up vs E11.5 * Ctrl |
| 10364675 | Gpx4          | NM_008162    | 0.00224632   | 1.23227 | E11.5 * Sox10 up vs E11.5 * Ctrl |
| 10465686 | Rtn3          | NM_001003934 | 6.32535e-005 | 1.23207 | E11.5 * Sox10 up vs E11.5 * Ctrl |
| 10558436 | BC005624      | BC005624     | 0.00840328   | 1.23181 | E11.5 * Sox10 up vs E11.5 * Ctrl |
| 10369586 | Supv3l1       | NM_181423    | 0.00254501   | 1.2315  | E11.5 * Sox10 up vs E11.5 * Ctrl |
| 10542108 | Tom1          | NM_011622    | 0.00229304   | 1.2311  | E11.5 * Sox10 up vs E11.5 * Ctrl |
| 10349404 | Mgat5         | NM_145128    | 0.00205615   | 1.23099 | E11.5 * Sox10 up vs E11.5 * Ctrl |
| 10389269 | Aatf          | NM_019816    | 0.000487297  | 1.23098 | E11.5 * Sox10 up vs E11.5 * Ctrl |
| 10581111 | Nae1          | NM_144931    | 0.000481186  | 1.23093 | E11.5 * Sox10 up vs E11.5 * Ctrl |
| 10469951 | Rnf208        | NM_176834    | 0.00358841   | 1.23091 | E11.5 * Sox10 up vs E11.5 * Ctrl |
| 10412227 | Snx18         | NM_130796    | 0.00127193   | 1.23072 | E11.5 * Sox10 up vs E11.5 * Ctrl |
| 10503882 | Rngt          | NM_011884    | 0.00278249   | 1.23059 | E11.5 * Sox10 up vs E11.5 * Ctrl |
| 10526391 | 2900083111Rik | NM_021403    | 0.00508986   | 1.23031 | E11.5 * Sox10 up vs E11.5 * Ctrl |
| 10593591 | Acat1         | NM_144784    | 3.98336e-005 | 1.23022 | E11.5 * Sox10 up vs E11.5 * Ctrl |
| 10458293 | Dnajc18       | NM_029669    | 0.00400005   | 1.23013 | E11.5 * Sox10 up vs E11.5 * Ctrl |
| 10416082 | Trim35        | NM_029979    | 0.000539357  | 1.23003 | E11.5 * Sox10 up vs E11.5 * Ctrl |
| 10472440 | Tax1bp3       | NM_029564    | 0.00029573   | 1.23002 | E11.5 * Sox10 up vs E11.5 * Ctrl |
| 10590549 | Exosc7        | NM_001081188 | 0.000823582  | 1.22995 | E11.5 * Sox10 up vs E11.5 * Ctrl |
| 10450605 | Tubb5         | NM_011655    | 0.00239116   | 1.22987 | E11.5 * Sox10 up vs E11.5 * Ctrl |
| 10575550 | Aars          | NM_146217    | 0.00137241   | 1.22986 | E11.5 * Sox10 up vs E11.5 * Ctrl |
| 10437499 | 3930401K13Rik | NM_001079814 | 0.00591694   | 1.22969 | E11.5 * Sox10 up vs E11.5 * Ctrl |
| 10404840 | Cd83          | NM_009856    | 0.00404482   | 1.22962 | E11.5 * Sox10 up vs E11.5 * Ctrl |
| 10592856 | Ccdc84        | NM_201372    | 0.00398683   | 1.22956 | E11.5 * Sox10 up vs E11.5 * Ctrl |
| 10438959 | Lsg1          | NM_178069    | 0.00117999   | 1.22945 | E11.5 * Sox10 up vs E11.5 * Ctrl |
| 10598422 | Gripap1       | NM_207670    | 0.00231887   | 1.2292  | E11.5 * Sox10 up vs E11.5 * Ctrl |
| 10445941 | 100043485     | XR_033353    | 0.00650357   | 1.22915 | E11.5 * Sox10 up vs E11.5 * Ctrl |
| 10558134 | Plekha1       | NM_133942    | 0.0025168    | 1.22905 | E11.5 * Sox10 up vs E11.5 * Ctrl |
| 10518361 | Smarca5       | NM_053124    | 0.000334824  | 1.22902 | E11.5 * Sox10 up vs E11.5 * Ctrl |
| 10448803 | Hn1l          | NM_198937    | 0.000749435  | 1.22899 | E11.5 * Sox10 up vs E11.5 * Ctrl |
| 10538087 | Lrrc61        | NM_177736    | 0.00575298   | 1.22884 | E11.5 * Sox10 up vs E11.5 * Ctrl |
| 10499483 | Fdps          | NM_134469    | 0.00181331   | 1.22884 | E11.5 * Sox10 up vs E11.5 * Ctrl |
| 10458398 | Hars          | NM_008214    | 0.00068304   | 1.22877 | E11.5 * Sox10 up vs E11.5 * Ctrl |
| 10395005 | Kidins220     | NM_001081378 | 0.000130702  | 1.22874 | E11.5 * Sox10 up vs E11.5 * Ctrl |
| 10533327 | Mapkapk5      | NM_010765    | 0.000493099  | 1.22861 | E11.5 * Sox10 up vs E11.5 * Ctrl |
| 10435226 | Snx4          | NM_080557    | 0.00332245   | 1.22835 | E11.5 * Sox10 up vs E11.5 * Ctrl |
| 10474588 | 2900064A13Rik | BC115477     | 0.00641051   | 1.22829 | E11.5 * Sox10 up vs E11.5 * Ctrl |
| 10458547 | Gnpda1        | NM_011937    | 0.00209012   | 1.22826 | E11.5 * Sox10 up vs E11.5 * Ctrl |
| 10414093 | Glud1         | NM_008133    | 0.0021576    | 1.22823 | E11.5 * Sox10 up vs E11.5 * Ctrl |
| 10532157 | Tmed5         | NM_028876    | 0.00368512   | 1.22816 | E11.5 * Sox10 up vs E11.5 * Ctrl |
| 10384811 | Ccdc104       | NM_025740    | 0.00595319   | 1.22787 | E11.5 * Sox10 up vs E11.5 * Ctrl |
| 10500388 | Polr3c        | NM_028925    | 0.00680378   | 1.22786 | E11.5 * Sox10 up vs E11.5 * Ctrl |
| 10555695 | Rrm1          | NM_009103    | 3.44097e-005 | 1.22775 | E11.5 * Sox10 up vs E11.5 * Ctrl |
| 10526261 | Stx1a         | NM_016801    | 0.00380609   | 1.22749 | E11.5 * Sox10 up vs E11.5 * Ctrl |
| 10604844 | Sms           | NM_009214    | 0.000378565  | 1.22707 | E11.5 * Sox10 up vs E11.5 * Ctrl |
| 10550815 | V1rd9         | NM_030735    | 0.00779072   | 1.22701 | E11.5 * Sox10 up vs E11.5 * Ctrl |
| 10436446 | Gps1          | NM_145370    | 0.00936171   | 1.22672 | E11.5 * Sox10 up vs E11.5 * Ctrl |
| 10469145 | Kin           | NM_025280    | 0.00196817   | 1.22654 | E11.5 * Sox10 up vs E11.5 * Ctrl |
| 10392284 | Kpna2         | NM_010655    | 0.00130015   | 1.22653 | E11.5 * Sox10 up vs E11.5 * Ctrl |
| 10353803 | Ugcgl1        | NM_198899    | 0.00112221   | 1.2265  | E11.5 * Sox10 up vs E11.5 * Ctrl |
| 10348180 | Elf4e2        | NM_001039169 | 0.0017528    | 1.22635 | E11.5 * Sox10 up vs E11.5 * Ctrl |
| 10422518 | Tmtc4         | NM_028651    | 0.00165213   | 1.22624 | E11.5 * Sox10 up vs E11.5 * Ctrl |
| 10502537 | Sh3glb1       | NM_019464    | 1.26208e-005 | 1.22589 | E11.5 * Sox10 up vs E11.5 * Ctrl |
| 10531133 | Grsf1         | NM_178700    | 2.3891e-006  | 1.22586 | E11.5 * Sox10 up vs E11.5 * Ctrl |
| 10431266 | Cerk          | NM_145475    | 0.00133172   | 1.22577 | E11.5 * Sox10 up vs E11.5 * Ctrl |
| 10523297 | Ccng2         | NM_007635    | 0.00904197   | 1.22564 | E11.5 * Sox10 up vs E11.5 * Ctrl |
| 10357242 | Dbi           | NM_001037999 | 0.00831674   | 1.22545 | E11.5 * Sox10 up vs E11.5 * Ctrl |
| 10406795 | Gfm2          | NM_177266    | 0.000223768  | 1.22521 | E11.5 * Sox10 up vs E11.5 * Ctrl |
| 10414374 | Ktn1          | NM_008477    | 0.000173056  | 1.2252  | E11.5 * Sox10 up vs E11.5 * Ctrl |
| 10577226 | 2610019F03Rik | NM_173744    | 0.00285029   | 1.22514 | E11.5 * Sox10 up vs E11.5 * Ctrl |
| 10350489 | Uchl5         | NM_019562    | 5.28682e-005 | 1.22495 | E11.5 * Sox10 up vs E11.5 * Ctrl |
| 10418804 | Timm23        | NM_016897    | 3.71048e-005 | 1.22494 | E11.5 * Sox10 up vs E11.5 * Ctrl |
| 10494857 | Nras          | NM_010937    | 8.15784e-005 | 1.22491 | E11.5 * Sox10 up vs E11.5 * Ctrl |
| 10521461 | Grpel1        | NM_024478    | 0.00098211   | 1.2248  | E11.5 * Sox10 up vs E11.5 * Ctrl |
| 10589511 | Scap          | NM_001001144 | 0.00437963   | 1.22475 | E11.5 * Sox10 up vs E11.5 * Ctrl |

|          |               |               |              |         |                                  |
|----------|---------------|---------------|--------------|---------|----------------------------------|
| 10553967 | Pcsk6         | ENSMUST000001 | 0.00814936   | 1.22473 | E11.5 * Sox10 up vs E11.5 * Ctrl |
| 10464070 | Vti1a         | NM_016862     | 0.00578694   | 1.22473 | E11.5 * Sox10 up vs E11.5 * Ctrl |
| 10558458 | Ppp2r2d       | NM_026391     | 0.00154542   | 1.22466 | E11.5 * Sox10 up vs E11.5 * Ctrl |
| 10516605 | Hdac1         | NM_008228     | 0.000100749  | 1.22447 | E11.5 * Sox10 up vs E11.5 * Ctrl |
| 10381187 | Atp6v0a1      | NM_016920     | 0.00144658   | 1.22439 | E11.5 * Sox10 up vs E11.5 * Ctrl |
| 10497773 | Mccc1         | NM_023644     | 0.00352023   | 1.22435 | E11.5 * Sox10 up vs E11.5 * Ctrl |
| 10420035 | Ipo4          | NM_024267     | 0.00524009   | 1.22429 | E11.5 * Sox10 up vs E11.5 * Ctrl |
| 10590325 | Ctnnb1        | NM_007614     | 0.00281787   | 1.22415 | E11.5 * Sox10 up vs E11.5 * Ctrl |
| 10447708 | Qk            | NM_021881     | 4.37373e-005 | 1.2241  | E11.5 * Sox10 up vs E11.5 * Ctrl |
| 10588903 | Usp4          | NM_011678     | 7.484e-005   | 1.22396 | E11.5 * Sox10 up vs E11.5 * Ctrl |
| 10481525 | Tor1a         | NM_144884     | 0.00730373   | 1.22383 | E11.5 * Sox10 up vs E11.5 * Ctrl |
| 10479765 | Suv39h2       | NM_022724     | 0.000270665  | 1.22382 | E11.5 * Sox10 up vs E11.5 * Ctrl |
| 10391567 | Tmem101       | NM_029649     | 0.00221587   | 1.22382 | E11.5 * Sox10 up vs E11.5 * Ctrl |
| 10535508 | AU022870      | BC048077      | 0.00825973   | 1.22381 | E11.5 * Sox10 up vs E11.5 * Ctrl |
| 10463836 | Gsto1         | NM_010362     | 0.00590369   | 1.2238  | E11.5 * Sox10 up vs E11.5 * Ctrl |
| 10579860 | Smad1         | NM_008539     | 0.000445125  | 1.22342 | E11.5 * Sox10 up vs E11.5 * Ctrl |
| 10445214 | Mut           | NM_008650     | 0.00448134   | 1.22337 | E11.5 * Sox10 up vs E11.5 * Ctrl |
| 10356379 | Ecel1         | NM_021306     | 0.00801292   | 1.22334 | E11.5 * Sox10 up vs E11.5 * Ctrl |
| 10375941 | Vdac1         | NM_011694     | 0.00462356   | 1.22313 | E11.5 * Sox10 up vs E11.5 * Ctrl |
| 10452937 | Heatr5b       | NM_001081179  | 0.000661764  | 1.2231  | E11.5 * Sox10 up vs E11.5 * Ctrl |
| 10402336 | Ddx24         | NM_001159502  | 0.00170092   | 1.22309 | E11.5 * Sox10 up vs E11.5 * Ctrl |
| 10606926 | 1700025D03Rik | NM_026469     | 1.35464e-005 | 1.22304 | E11.5 * Sox10 up vs E11.5 * Ctrl |
| 10534324 | Limk1         | NM_010717     | 0.00291287   | 1.22299 | E11.5 * Sox10 up vs E11.5 * Ctrl |
| 10371307 | Nfyb          | NM_010914     | 0.00969904   | 1.22275 | E11.5 * Sox10 up vs E11.5 * Ctrl |
| 10378508 | Tsr1          | NM_177325     | 0.000614465  | 1.22258 | E11.5 * Sox10 up vs E11.5 * Ctrl |
| 10413502 | Actr8         | NM_027493     | 0.00421162   | 1.22206 | E11.5 * Sox10 up vs E11.5 * Ctrl |
| 10526181 | Gatsl2        | NM_030719     | 0.00738691   | 1.22197 | E11.5 * Sox10 up vs E11.5 * Ctrl |
| 10360806 | Capn2         | NM_009794     | 0.00904745   | 1.22195 | E11.5 * Sox10 up vs E11.5 * Ctrl |
| 10385343 | Ttc1          | NM_133795     | 0.000398799  | 1.22173 | E11.5 * Sox10 up vs E11.5 * Ctrl |
| 10604100 | Ndufa1        | NM_019443     | 0.000193588  | 1.22171 | E11.5 * Sox10 up vs E11.5 * Ctrl |
| 10390574 | Fbxl20        | NM_028149     | 0.00481099   | 1.2217  | E11.5 * Sox10 up vs E11.5 * Ctrl |
| 10431874 | Slc38a1       | NM_134086     | 0.00116654   | 1.22136 | E11.5 * Sox10 up vs E11.5 * Ctrl |
| 10554463 | Hddc3         | NM_026812     | 0.00274838   | 1.22112 | E11.5 * Sox10 up vs E11.5 * Ctrl |
| 10361828 | Cited2        | NM_010828     | 0.00367463   | 1.22111 | E11.5 * Sox10 up vs E11.5 * Ctrl |
| 10532187 | Gak           | NM_153569     | 0.000217486  | 1.2211  | E11.5 * Sox10 up vs E11.5 * Ctrl |
| 10455989 | Rbm22         | NM_025776     | 0.000222416  | 1.22105 | E11.5 * Sox10 up vs E11.5 * Ctrl |
| 10414623 | E130112L23Rik | NM_198249     | 0.00159957   | 1.22101 | E11.5 * Sox10 up vs E11.5 * Ctrl |
| 10421672 | 120001118Rik  | NM_026177     | 0.00602626   | 1.22077 | E11.5 * Sox10 up vs E11.5 * Ctrl |
| 10418480 | Gnl3          | NM_153547     | 0.00155083   | 1.22071 | E11.5 * Sox10 up vs E11.5 * Ctrl |
| 10502232 | Scye1         | NM_007926     | 0.00162405   | 1.22045 | E11.5 * Sox10 up vs E11.5 * Ctrl |
| 10556571 | Rpl19         | NM_009078     | 0.000223742  | 1.22032 | E11.5 * Sox10 up vs E11.5 * Ctrl |
| 10516982 | Stx12         | NM_133887     | 0.000468365  | 1.22022 | E11.5 * Sox10 up vs E11.5 * Ctrl |
| 10389701 | Akap1         | NM_009648     | 0.000856663  | 1.22019 | E11.5 * Sox10 up vs E11.5 * Ctrl |
| 10375667 | Rnf130        | NM_021540     | 0.00560521   | 1.22009 | E11.5 * Sox10 up vs E11.5 * Ctrl |
| 10607694 | Syap1         | NM_025932     | 0.0046676    | 1.21999 | E11.5 * Sox10 up vs E11.5 * Ctrl |
| 10554445 | Prc1          | NM_145150     | 0.00725087   | 1.21998 | E11.5 * Sox10 up vs E11.5 * Ctrl |
| 10493585 | Ube2q1        | NM_027315     | 0.000626059  | 1.21979 | E11.5 * Sox10 up vs E11.5 * Ctrl |
| 10569071 | Hras1         | NM_001130444  | 0.000293995  | 1.21963 | E11.5 * Sox10 up vs E11.5 * Ctrl |
| 10360884 | Iars2         | NM_198653     | 0.00139557   | 1.2196  | E11.5 * Sox10 up vs E11.5 * Ctrl |
| 10550925 | Zfp428        | NM_146183     | 0.000157738  | 1.21954 | E11.5 * Sox10 up vs E11.5 * Ctrl |
| 10558847 | Phrf1         | NM_001081118  | 0.0035491    | 1.21953 | E11.5 * Sox10 up vs E11.5 * Ctrl |
| 10406718 | Wdr41         | NM_172590     | 0.00926832   | 1.21947 | E11.5 * Sox10 up vs E11.5 * Ctrl |
| 10493120 | Gpatch4       | NM_025663     | 0.00193134   | 1.21946 | E11.5 * Sox10 up vs E11.5 * Ctrl |
| 10399121 | Ptprn2        | NM_011215     | 0.00223152   | 1.21942 | E11.5 * Sox10 up vs E11.5 * Ctrl |
| 10498064 | Setd7         | NM_080793     | 0.00287259   | 1.21908 | E11.5 * Sox10 up vs E11.5 * Ctrl |
| 10447004 | Hdac1         | NM_008228     | 0.000268446  | 1.21883 | E11.5 * Sox10 up vs E11.5 * Ctrl |
| 10477649 | Acss2         | NM_019811     | 0.00651619   | 1.2185  | E11.5 * Sox10 up vs E11.5 * Ctrl |
| 10477630 | Dynlrb1       | NM_025947     | 2.74737e-009 | 1.21847 | E11.5 * Sox10 up vs E11.5 * Ctrl |
| 10448292 | Thoc6         | NM_001008425  | 0.00335319   | 1.21831 | E11.5 * Sox10 up vs E11.5 * Ctrl |
| 10384183 | AB182283      | NM_001081652  | 0.000559339  | 1.21811 | E11.5 * Sox10 up vs E11.5 * Ctrl |
| 10425966 | Atxn10        | NM_016843     | 0.000327534  | 1.21788 | E11.5 * Sox10 up vs E11.5 * Ctrl |
| 10544891 | Nod1          | NM_172729     | 0.00647683   | 1.21784 | E11.5 * Sox10 up vs E11.5 * Ctrl |
| 10446907 | Ttc27         | NM_152817     | 0.0100522    | 1.21763 | E11.5 * Sox10 up vs E11.5 * Ctrl |
| 10388234 | Gsg2          | NM_010353     | 0.00306643   | 1.21749 | E11.5 * Sox10 up vs E11.5 * Ctrl |
| 10433536 | Clec16a       | NM_177562     | 0.00096748   | 1.21746 | E11.5 * Sox10 up vs E11.5 * Ctrl |
| 10532463 | Pus1          | NM_001025561  | 0.00286156   | 1.21724 | E11.5 * Sox10 up vs E11.5 * Ctrl |

|          |               |              |              |         |                                  |
|----------|---------------|--------------|--------------|---------|----------------------------------|
| 10549447 | Ipo8          | NM_001081113 | 0.00768458   | 1.21675 | E11.5 * Sox10 up vs E11.5 * Ctrl |
| 10586274 | 2010321M09Rik | NM_175153    | 0.0012049    | 1.21669 | E11.5 * Sox10 up vs E11.5 * Ctrl |
| 10388132 | 4933427D14Rik | BC043106     | 0.000591941  | 1.21631 | E11.5 * Sox10 up vs E11.5 * Ctrl |
| 10451637 | 1700122O11Rik | ENSMUST00000 | 0.000637569  | 1.21625 | E11.5 * Sox10 up vs E11.5 * Ctrl |
| 10607724 | Zrsr2         | NM_178794    | 0.000705767  | 1.21613 | E11.5 * Sox10 up vs E11.5 * Ctrl |
| 10547140 | Tmcc1         | ENSMUST00000 | 0.000397574  | 1.21597 | E11.5 * Sox10 up vs E11.5 * Ctrl |
| 10438726 | Masp1         | ENSMUST00000 | 0.00611022   | 1.21588 | E11.5 * Sox10 up vs E11.5 * Ctrl |
| 10424825 | Cyc1          | NM_025567    | 0.00474715   | 1.21584 | E11.5 * Sox10 up vs E11.5 * Ctrl |
| 10460312 | Cdk2ap2       | NM_026373    | 0.00631639   | 1.21569 | E11.5 * Sox10 up vs E11.5 * Ctrl |
| 10373542 | Dgka          | NM_016811    | 0.0035869    | 1.21563 | E11.5 * Sox10 up vs E11.5 * Ctrl |
| 10563615 | Hps5          | NM_001005247 | 0.00356933   | 1.21548 | E11.5 * Sox10 up vs E11.5 * Ctrl |
| 10363368 | Timm23        | NM_016897    | 5.23115e-005 | 1.21499 | E11.5 * Sox10 up vs E11.5 * Ctrl |
| 10574632 | Cbfb          | NM_022309    | 0.000272265  | 1.2149  | E11.5 * Sox10 up vs E11.5 * Ctrl |
| 10559513 | Cab39         | NM_133781    | 0.000974451  | 1.21477 | E11.5 * Sox10 up vs E11.5 * Ctrl |
| 10502522 | Hs2st1        | NM_011828    | 3.35841e-006 | 1.21449 | E11.5 * Sox10 up vs E11.5 * Ctrl |
| 10485361 | B230118H07Rik | NM_026592    | 0.00768729   | 1.21434 | E11.5 * Sox10 up vs E11.5 * Ctrl |
| 10362171 | Stx7          | NM_016797    | 0.00266773   | 1.21429 | E11.5 * Sox10 up vs E11.5 * Ctrl |
| 10426030 | Trmu          | NM_028063    | 0.00503346   | 1.21428 | E11.5 * Sox10 up vs E11.5 * Ctrl |
| 10409204 | ENSMUSG0000C  | XM_001474265 | 8.85225e-005 | 1.2141  | E11.5 * Sox10 up vs E11.5 * Ctrl |
| 10360506 | Akt3          | NM_011785    | 0.000416209  | 1.21404 | E11.5 * Sox10 up vs E11.5 * Ctrl |
| 10467216 | Cpeb3         | NM_198300    | 0.00564546   | 1.21392 | E11.5 * Sox10 up vs E11.5 * Ctrl |
| 10534585 | Sh2b2         | NM_018825    | 0.00465937   | 1.21333 | E11.5 * Sox10 up vs E11.5 * Ctrl |
| 10385616 | Rufy1         | NM_172557    | 0.00552233   | 1.21312 | E11.5 * Sox10 up vs E11.5 * Ctrl |
| 10568260 | Zfp629        | NM_177226    | 0.00180809   | 1.21302 | E11.5 * Sox10 up vs E11.5 * Ctrl |
| 10537062 | Mest          | NM_008590    | 0.000166192  | 1.21297 | E11.5 * Sox10 up vs E11.5 * Ctrl |
| 10497842 | Bbs7          | NM_027810    | 0.000834158  | 1.21296 | E11.5 * Sox10 up vs E11.5 * Ctrl |
| 10384349 | Polr2c        | NM_009090    | 0.00891775   | 1.2129  | E11.5 * Sox10 up vs E11.5 * Ctrl |
| 10587211 | Leo1          | NM_001039522 | 0.000169345  | 1.21276 | E11.5 * Sox10 up vs E11.5 * Ctrl |
| 10557585 | Zfp553        | NM_146201    | 0.00695706   | 1.21269 | E11.5 * Sox10 up vs E11.5 * Ctrl |
| 10355037 | Wdr12         | NM_021312    | 0.00175476   | 1.21228 | E11.5 * Sox10 up vs E11.5 * Ctrl |
| 10548176 | 5930416119Rik | NR_027360    | 0.007131     | 1.2117  | E11.5 * Sox10 up vs E11.5 * Ctrl |
| 10585706 | Cox5a         | NM_007747    | 0.00793703   | 1.21165 | E11.5 * Sox10 up vs E11.5 * Ctrl |
| 10415574 | Ccni          | NM_017367    | 0.000413528  | 1.21146 | E11.5 * Sox10 up vs E11.5 * Ctrl |
| 10460732 | Znhit2        | NM_013859    | 0.00434431   | 1.21123 | E11.5 * Sox10 up vs E11.5 * Ctrl |
| 10490826 | Zbtb10        | ENSMUST00000 | 0.00655255   | 1.21108 | E11.5 * Sox10 up vs E11.5 * Ctrl |
| 10427910 | Fam105b       | NM_001013792 | 0.00673106   | 1.21081 | E11.5 * Sox10 up vs E11.5 * Ctrl |
| 10495243 | Gstm5         | NM_010360    | 0.000802156  | 1.21075 | E11.5 * Sox10 up vs E11.5 * Ctrl |
| 10581159 | Fam96b        | NM_026753    | 0.00498777   | 1.21072 | E11.5 * Sox10 up vs E11.5 * Ctrl |
| 10423185 | Rnasen        | NM_001130149 | 0.00303441   | 1.21048 | E11.5 * Sox10 up vs E11.5 * Ctrl |
| 10476648 | Dstn          | NM_019771    | 0.000949961  | 1.21044 | E11.5 * Sox10 up vs E11.5 * Ctrl |
| 10383485 | Gps1          | NM_145370    | 0.00656111   | 1.2104  | E11.5 * Sox10 up vs E11.5 * Ctrl |
| 10488472 | 2310001A20Rik | AJ310638     | 0.00411136   | 1.21036 | E11.5 * Sox10 up vs E11.5 * Ctrl |
| 10578582 | D030016E14Rik | NM_177240    | 0.00107227   | 1.21035 | E11.5 * Sox10 up vs E11.5 * Ctrl |
| 10540241 | Arl6ip5       | NM_022992    | 0.00866151   | 1.21021 | E11.5 * Sox10 up vs E11.5 * Ctrl |
| 10448700 | Gfer          | NM_023040    | 0.00152567   | 1.20985 | E11.5 * Sox10 up vs E11.5 * Ctrl |
| 10461257 | Ubxn1         | NM_146093    | 0.00541329   | 1.20977 | E11.5 * Sox10 up vs E11.5 * Ctrl |
| 10397719 | Tdp1          | NM_028354    | 0.00213441   | 1.20974 | E11.5 * Sox10 up vs E11.5 * Ctrl |
| 10572880 | Tom1          | NM_011622    | 0.0017402    | 1.20969 | E11.5 * Sox10 up vs E11.5 * Ctrl |
| 10357280 | Insig2        | NM_133748    | 0.00736817   | 1.20968 | E11.5 * Sox10 up vs E11.5 * Ctrl |
| 10346255 | Ormdl1        | NM_145517    | 0.0103489    | 1.20946 | E11.5 * Sox10 up vs E11.5 * Ctrl |
| 10594551 | Zfp609        | NM_172536    | 0.00484321   | 1.20925 | E11.5 * Sox10 up vs E11.5 * Ctrl |
| 10585474 | Psma4         | NM_011966    | 0.00147852   | 1.20909 | E11.5 * Sox10 up vs E11.5 * Ctrl |
| 10397752 | Calm1         | NM_009790    | 1.17699e-006 | 1.20907 | E11.5 * Sox10 up vs E11.5 * Ctrl |
| 10466848 | D19Bwg1357e   | NM_177474    | 4.86398e-005 | 1.20881 | E11.5 * Sox10 up vs E11.5 * Ctrl |
| 10360130 | Nit1          | NM_012049    | 0.00879905   | 1.20866 | E11.5 * Sox10 up vs E11.5 * Ctrl |
| 10358726 | Tsen15        | NM_025677    | 0.00596967   | 1.20849 | E11.5 * Sox10 up vs E11.5 * Ctrl |
| 10499265 | Prcc          | NM_033573    | 0.00612822   | 1.20838 | E11.5 * Sox10 up vs E11.5 * Ctrl |
| 10602840 | Sh3kbp1       | NM_021389    | 1.66684e-005 | 1.20828 | E11.5 * Sox10 up vs E11.5 * Ctrl |
| 10384672 | Ahsa2         | NM_172391    | 0.000613275  | 1.20816 | E11.5 * Sox10 up vs E11.5 * Ctrl |
| 10586477 | Ppib          | NM_011149    | 0.000566673  | 1.20814 | E11.5 * Sox10 up vs E11.5 * Ctrl |
| 10549388 | Pthlh         | NM_008970    | 0.00713995   | 1.20776 | E11.5 * Sox10 up vs E11.5 * Ctrl |
| 10522265 | Slc30a9       | NM_178651    | 0.00782799   | 1.20764 | E11.5 * Sox10 up vs E11.5 * Ctrl |
| 10490946 | Hsp90aa1      | NM_010480    | 0.000298524  | 1.20752 | E11.5 * Sox10 up vs E11.5 * Ctrl |
| 10380773 | 4933428G20Rik | NM_021493    | 0.00368239   | 1.20741 | E11.5 * Sox10 up vs E11.5 * Ctrl |
| 10360270 | Atp1a2        | NM_178405    | 0.000527631  | 1.20733 | E11.5 * Sox10 up vs E11.5 * Ctrl |
| 10385159 | Rars          | NM_025936    | 1.70367e-007 | 1.20731 | E11.5 * Sox10 up vs E11.5 * Ctrl |

|          |               |              |              |         |                                  |
|----------|---------------|--------------|--------------|---------|----------------------------------|
| 10536297 | Ppp1r9a       | NM_181595    | 0.000898286  | 1.20715 | E11.5 * Sox10 up vs E11.5 * Ctrl |
| 10484520 | 4833423E24Rik | BC120879     | 0.00405722   | 1.2071  | E11.5 * Sox10 up vs E11.5 * Ctrl |
| 10505927 | ---           | ---          | 0.00732124   | 1.20698 | E11.5 * Sox10 up vs E11.5 * Ctrl |
| 10425757 | 1500032L24Rik | BC092006     | 0.00054421   | 1.20694 | E11.5 * Sox10 up vs E11.5 * Ctrl |
| 10524640 | 2210016L21Rik | BC031162     | 0.00730166   | 1.2067  | E11.5 * Sox10 up vs E11.5 * Ctrl |
| 10546349 | Xpc           | NM_009531    | 5.6985e-005  | 1.20648 | E11.5 * Sox10 up vs E11.5 * Ctrl |
| 10511113 | Cdc2l1        | NM_007661    | 3.33571e-005 | 1.20644 | E11.5 * Sox10 up vs E11.5 * Ctrl |
| 10545394 | Rnf181        | NM_025607    | 0.0089099    | 1.20622 | E11.5 * Sox10 up vs E11.5 * Ctrl |
| 10465263 | Dpf2          | NM_011262    | 0.000840073  | 1.20595 | E11.5 * Sox10 up vs E11.5 * Ctrl |
| 10539279 | Aup1          | NM_007517    | 0.00359238   | 1.20577 | E11.5 * Sox10 up vs E11.5 * Ctrl |
| 10510142 | Vmn2r-ps14    | NR_002888    | 0.00134793   | 1.20576 | E11.5 * Sox10 up vs E11.5 * Ctrl |
| 10483584 | Mettl8        | NM_145524    | 0.00654302   | 1.20563 | E11.5 * Sox10 up vs E11.5 * Ctrl |
| 10373924 | Ascc2         | NM_029291    | 0.000501147  | 1.20552 | E11.5 * Sox10 up vs E11.5 * Ctrl |
| 10388276 | Olfir382      | NM_146443    | 0.00388641   | 1.20499 | E11.5 * Sox10 up vs E11.5 * Ctrl |
| 10504926 | Rnf20         | NM_182999    | 5.15841e-005 | 1.20468 | E11.5 * Sox10 up vs E11.5 * Ctrl |
| 10370446 | Trappc10      | NM_001081055 | 0.010023     | 1.20464 | E11.5 * Sox10 up vs E11.5 * Ctrl |
| 10592734 | Cbl           | NM_007619    | 0.0020483    | 1.20455 | E11.5 * Sox10 up vs E11.5 * Ctrl |
| 10527732 | Fry           | ENSMUST00000 | 0.00370371   | 1.2042  | E11.5 * Sox10 up vs E11.5 * Ctrl |
| 10496036 | Col25a1       | NM_029838    | 0.00775937   | 1.20383 | E11.5 * Sox10 up vs E11.5 * Ctrl |
| 10384529 | Cep68         | NM_172260    | 0.000572128  | 1.20372 | E11.5 * Sox10 up vs E11.5 * Ctrl |
| 10567407 | Thumpd1       | NM_145585    | 0.00152577   | 1.20371 | E11.5 * Sox10 up vs E11.5 * Ctrl |
| 10515012 | Prpf38a       | NM_172697    | 0.00116134   | 1.20356 | E11.5 * Sox10 up vs E11.5 * Ctrl |
| 10569458 | Cars          | NM_013742    | 0.000196493  | 1.20351 | E11.5 * Sox10 up vs E11.5 * Ctrl |
| 10410134 | EG665612      | XR_033575    | 0.00297236   | 1.20346 | E11.5 * Sox10 up vs E11.5 * Ctrl |
| 10414433 | 6720456H20Rik | NM_172600    | 0.00291696   | 1.20321 | E11.5 * Sox10 up vs E11.5 * Ctrl |
| 10358717 | 1700025G04Rik | BC034723     | 0.00039287   | 1.20313 | E11.5 * Sox10 up vs E11.5 * Ctrl |
| 10515836 | Ccnb1         | NM_172301    | 0.00937469   | 1.20308 | E11.5 * Sox10 up vs E11.5 * Ctrl |
| 10349316 | Tmem185b      | NM_146103    | 0.00728665   | 1.203   | E11.5 * Sox10 up vs E11.5 * Ctrl |
| 10517312 | Tmem57        | NM_025382    | 0.0032352    | 1.20294 | E11.5 * Sox10 up vs E11.5 * Ctrl |
| 10468489 | Xpnpep1       | NM_133216    | 0.00128885   | 1.20293 | E11.5 * Sox10 up vs E11.5 * Ctrl |
| 10367843 | Utnr          | NM_011682    | 0.00281503   | 1.20292 | E11.5 * Sox10 up vs E11.5 * Ctrl |
| 10577534 | Vdac3         | NM_011696    | 0.000611034  | 1.20288 | E11.5 * Sox10 up vs E11.5 * Ctrl |
| 10405094 | Iars          | NM_172015    | 0.000185019  | 1.20248 | E11.5 * Sox10 up vs E11.5 * Ctrl |
| 10580457 | N4bp1         | BC004022     | 0.00756415   | 1.20217 | E11.5 * Sox10 up vs E11.5 * Ctrl |
| 10451238 | Polr1c        | NM_009085    | 0.00505199   | 1.20208 | E11.5 * Sox10 up vs E11.5 * Ctrl |
| 10379467 | Psmc11        | NM_178616    | 0.000112644  | 1.20189 | E11.5 * Sox10 up vs E11.5 * Ctrl |
| 10496742 | 2410004B18Rik | NM_025555    | 0.00239296   | 1.20188 | E11.5 * Sox10 up vs E11.5 * Ctrl |
| 10382010 | Wdr68         | NM_027946    | 0.000644898  | 1.20168 | E11.5 * Sox10 up vs E11.5 * Ctrl |
| 10361846 | Reps1         | NM_009048    | 0.0051198    | 1.20166 | E11.5 * Sox10 up vs E11.5 * Ctrl |
| 10442155 | Ppp2r1a       | NM_016891    | 0.0056731    | 1.20134 | E11.5 * Sox10 up vs E11.5 * Ctrl |
| 10569886 | Trappc5       | NM_025701    | 0.00459515   | 1.2013  | E11.5 * Sox10 up vs E11.5 * Ctrl |
| 10584954 | Pcsk7         | NM_008794    | 0.00443663   | 1.20115 | E11.5 * Sox10 up vs E11.5 * Ctrl |
| 10363845 | Ccdc6         | NM_001111121 | 0.00437467   | 1.20081 | E11.5 * Sox10 up vs E11.5 * Ctrl |
| 10424624 | Bai1          | NM_174991    | 0.00830958   | 1.20064 | E11.5 * Sox10 up vs E11.5 * Ctrl |
| 10382069 | Psmc5         | NM_008950    | 1.30073e-005 | 1.20055 | E11.5 * Sox10 up vs E11.5 * Ctrl |
| 10596857 | Apeh          | NM_146226    | 0.00551316   | 1.20042 | E11.5 * Sox10 up vs E11.5 * Ctrl |
| 10431802 | Twf1          | NM_008971    | 0.000495956  | 1.20019 | E11.5 * Sox10 up vs E11.5 * Ctrl |
| 10514374 | EG664886      | XR_030634    | 0.00549675   | 1.20015 | E11.5 * Sox10 up vs E11.5 * Ctrl |
| 10523529 | Cops4         | NM_012001    | 0.000266538  | 1.20009 | E11.5 * Sox10 up vs E11.5 * Ctrl |
| 10454655 | Apc           | NM_007462    | 0.00214738   | 1.20002 | E11.5 * Sox10 up vs E11.5 * Ctrl |
| 10425161 | Lgals1        | NM_008495    | 0.000626579  | 1.19997 | E11.5 * Sox10 up vs E11.5 * Ctrl |
| 10405971 | Nsun2         | NM_145354    | 9.90587e-005 | 1.19973 | E11.5 * Sox10 up vs E11.5 * Ctrl |
| 10379998 | Trim37        | NM_197987    | 0.00090738   | 1.19963 | E11.5 * Sox10 up vs E11.5 * Ctrl |
| 10461334 | Mta2          | NM_011842    | 0.000985042  | 1.1994  | E11.5 * Sox10 up vs E11.5 * Ctrl |
| 10421694 | ---           | ---          | 0.00624022   | 1.19928 | E11.5 * Sox10 up vs E11.5 * Ctrl |
| 10591139 | Naalad2       | NM_028279    | 0.00547612   | 1.19925 | E11.5 * Sox10 up vs E11.5 * Ctrl |
| 10401244 | Actn1         | NM_134156    | 0.0027139    | 1.19921 | E11.5 * Sox10 up vs E11.5 * Ctrl |
| 10465336 | Mrpl49        | NM_026246    | 0.00945803   | 1.19921 | E11.5 * Sox10 up vs E11.5 * Ctrl |
| 10535282 | Card11        | NM_175362    | 0.00604183   | 1.1992  | E11.5 * Sox10 up vs E11.5 * Ctrl |
| 10461354 | Tut1          | NM_197993    | 0.00961488   | 1.19913 | E11.5 * Sox10 up vs E11.5 * Ctrl |
| 10502419 | Rap1gds1      | NM_001040690 | 0.00592851   | 1.19874 | E11.5 * Sox10 up vs E11.5 * Ctrl |
| 10348866 | Atg4b         | NM_174874    | 0.00441426   | 1.19874 | E11.5 * Sox10 up vs E11.5 * Ctrl |
| 10382139 | Psmc12        | NM_025894    | 1.8012e-006  | 1.19861 | E11.5 * Sox10 up vs E11.5 * Ctrl |
| 10557432 | G730046D07Rik | AK144875     | 0.0061347    | 1.19828 | E11.5 * Sox10 up vs E11.5 * Ctrl |
| 10360454 | Opn3          | NM_010098    | 0.00974343   | 1.19827 | E11.5 * Sox10 up vs E11.5 * Ctrl |
| 10593103 | Rnf214        | NM_178709    | 0.00230971   | 1.19821 | E11.5 * Sox10 up vs E11.5 * Ctrl |

|          |               |              |              |         |                                  |
|----------|---------------|--------------|--------------|---------|----------------------------------|
| 10400538 | Trappc6b      | NM_030057    | 0.00486671   | 1.19797 | E11.5 * Sox10 up vs E11.5 * Ctrl |
| 10454709 | Kif20a        | NM_009004    | 7.2297e-005  | 1.19795 | E11.5 * Sox10 up vs E11.5 * Ctrl |
| 10580370 | Dnaja2        | NM_019794    | 3.68287e-006 | 1.19784 | E11.5 * Sox10 up vs E11.5 * Ctrl |
| 10529873 | Rab2a         | NM_021518    | 3.31449e-005 | 1.19775 | E11.5 * Sox10 up vs E11.5 * Ctrl |
| 10452905 | ---           | ---          | 0.00188122   | 1.19754 | E11.5 * Sox10 up vs E11.5 * Ctrl |
| 10416269 | Ppp3cc        | ENSMUST00000 | 0.00405617   | 1.19729 | E11.5 * Sox10 up vs E11.5 * Ctrl |
| 10407921 | Vdac3         | NM_011696    | 0.000424771  | 1.1972  | E11.5 * Sox10 up vs E11.5 * Ctrl |
| 10407926 | Vdac3         | NM_011696    | 0.000424771  | 1.1972  | E11.5 * Sox10 up vs E11.5 * Ctrl |
| 10393222 | Srp68         | NM_146032    | 0.00573509   | 1.19698 | E11.5 * Sox10 up vs E11.5 * Ctrl |
| 10547531 | Bid           | NM_007544    | 0.00855457   | 1.19697 | E11.5 * Sox10 up vs E11.5 * Ctrl |
| 10510305 | Frap1         | NM_020009    | 0.00765689   | 1.19691 | E11.5 * Sox10 up vs E11.5 * Ctrl |
| 10393021 | Recql5        | NM_130454    | 0.00244829   | 1.19669 | E11.5 * Sox10 up vs E11.5 * Ctrl |
| 10370259 | Col18a1       | NM_009929    | 0.00479503   | 1.19668 | E11.5 * Sox10 up vs E11.5 * Ctrl |
| 10572637 | Fam125a       | NM_028617    | 0.00590489   | 1.19622 | E11.5 * Sox10 up vs E11.5 * Ctrl |
| 10403756 | 1600012F09Rik | NM_025904    | 0.00522405   | 1.19595 | E11.5 * Sox10 up vs E11.5 * Ctrl |
| 10407916 | 1600012F09Rik | NM_025904    | 0.00522405   | 1.19595 | E11.5 * Sox10 up vs E11.5 * Ctrl |
| 10374564 | Cct4          | NM_009837    | 0.000132164  | 1.1958  | E11.5 * Sox10 up vs E11.5 * Ctrl |
| 10380524 | Slc35b1       | NM_016752    | 0.000373497  | 1.1958  | E11.5 * Sox10 up vs E11.5 * Ctrl |
| 10537078 | Mkln1         | NM_013791    | 0.00057428   | 1.19577 | E11.5 * Sox10 up vs E11.5 * Ctrl |
| 10471438 | Dpm2          | NM_010073    | 0.00551491   | 1.19558 | E11.5 * Sox10 up vs E11.5 * Ctrl |
| 10397741 | Psmc1         | NM_008947    | 0.00178584   | 1.19557 | E11.5 * Sox10 up vs E11.5 * Ctrl |
| 10445558 | BC048355      | NM_207161    | 0.0099386    | 1.19542 | E11.5 * Sox10 up vs E11.5 * Ctrl |
| 10393408 | Tmc6          | NM_145439    | 0.00463141   | 1.19516 | E11.5 * Sox10 up vs E11.5 * Ctrl |
| 10467637 | Arhgap19      | NM_027667    | 0.00613189   | 1.19511 | E11.5 * Sox10 up vs E11.5 * Ctrl |
| 10552125 | Pepd          | NM_008820    | 0.00609278   | 1.19492 | E11.5 * Sox10 up vs E11.5 * Ctrl |
| 10424485 | Phf201        | NM_001081409 | 0.00959504   | 1.19476 | E11.5 * Sox10 up vs E11.5 * Ctrl |
| 10352947 | Mrpl15        | NM_025300    | 0.000215538  | 1.19471 | E11.5 * Sox10 up vs E11.5 * Ctrl |
| 10347460 | Tll4          | NM_001014974 | 0.000166938  | 1.1947  | E11.5 * Sox10 up vs E11.5 * Ctrl |
| 10546586 | Tmf1          | NM_001081111 | 0.00695155   | 1.1946  | E11.5 * Sox10 up vs E11.5 * Ctrl |
| 10355742 | Abcb6         | NM_023732    | 0.00449204   | 1.19451 | E11.5 * Sox10 up vs E11.5 * Ctrl |
| 10597103 | Dhx30         | NM_133347    | 0.00058983   | 1.19431 | E11.5 * Sox10 up vs E11.5 * Ctrl |
| 10434675 | Dnajb11       | NM_026400    | 0.00219406   | 1.1943  | E11.5 * Sox10 up vs E11.5 * Ctrl |
| 10365830 | ---           | ---          | 0.0025115    | 1.19429 | E11.5 * Sox10 up vs E11.5 * Ctrl |
| 10500808 | Olfrml3       | NM_133859    | 0.00710532   | 1.19426 | E11.5 * Sox10 up vs E11.5 * Ctrl |
| 10535750 | Mtif3         | NM_029581    | 0.00692136   | 1.1942  | E11.5 * Sox10 up vs E11.5 * Ctrl |
| 10460157 | Cpt1a         | NM_013495    | 0.0100332    | 1.1941  | E11.5 * Sox10 up vs E11.5 * Ctrl |
| 10346323 | 02-Mar        | NM_175439    | 0.00746891   | 1.19385 | E11.5 * Sox10 up vs E11.5 * Ctrl |
| 10473793 | Psmc3         | NM_008948    | 4.7646e-005  | 1.19378 | E11.5 * Sox10 up vs E11.5 * Ctrl |
| 10441038 | Hlcs          | NM_139145    | 0.0094167    | 1.1937  | E11.5 * Sox10 up vs E11.5 * Ctrl |
| 10448192 | EG624960      | XR_033753    | 0.00311521   | 1.1935  | E11.5 * Sox10 up vs E11.5 * Ctrl |
| 10499839 | Snapin        | NM_133854    | 6.35492e-005 | 1.19337 | E11.5 * Sox10 up vs E11.5 * Ctrl |
| 10436708 | Usp16         | NM_024258    | 0.00832428   | 1.19304 | E11.5 * Sox10 up vs E11.5 * Ctrl |
| 10418927 | Bmpr1a        | NM_009758    | 0.000319268  | 1.19291 | E11.5 * Sox10 up vs E11.5 * Ctrl |
| 10479411 | Ogfr          | NM_031373    | 0.0013922    | 1.19266 | E11.5 * Sox10 up vs E11.5 * Ctrl |
| 10522335 | Atp10d        | NR_003966    | 0.00908034   | 1.19242 | E11.5 * Sox10 up vs E11.5 * Ctrl |
| 10490773 | Hnrnp2        | NM_019868    | 0.00483321   | 1.19232 | E11.5 * Sox10 up vs E11.5 * Ctrl |
| 10531323 | G3bp2         | NM_011816    | 0.000918202  | 1.19217 | E11.5 * Sox10 up vs E11.5 * Ctrl |
| 10481634 | Slc25a25      | NM_146118    | 0.00472355   | 1.1921  | E11.5 * Sox10 up vs E11.5 * Ctrl |
| 10502787 | Rpsa          | NM_011029    | 0.00853828   | 1.19205 | E11.5 * Sox10 up vs E11.5 * Ctrl |
| 10541114 | Rasgef1a      | BC138284     | 0.0102358    | 1.19198 | E11.5 * Sox10 up vs E11.5 * Ctrl |
| 10549979 | 100042997     | XR_034250    | 0.00127573   | 1.19187 | E11.5 * Sox10 up vs E11.5 * Ctrl |
| 10365297 | D10Wsu102e    | BC094241     | 0.00312659   | 1.19166 | E11.5 * Sox10 up vs E11.5 * Ctrl |
| 10498802 | Rapgef2       | NM_001099624 | 0.00174873   | 1.1916  | E11.5 * Sox10 up vs E11.5 * Ctrl |
| 10382565 | Mrps7         | NM_025305    | 0.000510311  | 1.19158 | E11.5 * Sox10 up vs E11.5 * Ctrl |
| 10480605 | Cobra1        | NM_021393    | 0.000658479  | 1.19136 | E11.5 * Sox10 up vs E11.5 * Ctrl |
| 10393823 | P4hb          | NM_011032    | 0.00575566   | 1.19125 | E11.5 * Sox10 up vs E11.5 * Ctrl |
| 10557631 | Prr14         | NM_145589    | 0.000140351  | 1.19106 | E11.5 * Sox10 up vs E11.5 * Ctrl |
| 10376096 | Acsl6         | NM_001033598 | 0.00155559   | 1.19092 | E11.5 * Sox10 up vs E11.5 * Ctrl |
| 10386095 | Fam114a2      | NM_026342    | 0.00360361   | 1.19087 | E11.5 * Sox10 up vs E11.5 * Ctrl |
| 10457844 | Zfp191        | NM_021559    | 0.000438175  | 1.19079 | E11.5 * Sox10 up vs E11.5 * Ctrl |
| 10580771 | Ciapi1        | NM_134141    | 0.000450931  | 1.19075 | E11.5 * Sox10 up vs E11.5 * Ctrl |
| 10367337 | Rnf41         | NM_026259    | 0.00131347   | 1.19071 | E11.5 * Sox10 up vs E11.5 * Ctrl |
| 10462136 | Cycs          | NM_007808    | 0.00876263   | 1.19067 | E11.5 * Sox10 up vs E11.5 * Ctrl |
| 10393309 | Prpsap1       | BC029621     | 0.00646541   | 1.19059 | E11.5 * Sox10 up vs E11.5 * Ctrl |
| 10575144 | Nip7          | NM_025391    | 0.0057284    | 1.19034 | E11.5 * Sox10 up vs E11.5 * Ctrl |
| 10599200 | Pgrmc1        | NM_016783    | 0.010275     | 1.19006 | E11.5 * Sox10 up vs E11.5 * Ctrl |

|          |               |              |              |         |                                  |
|----------|---------------|--------------|--------------|---------|----------------------------------|
| 10347254 | Smarcal1      | NM_018817    | 0.000496886  | 1.18973 | E11.5 * Sox10 up vs E11.5 * Ctrl |
| 10467859 | Cox15         | NM_144874    | 0.00733525   | 1.18939 | E11.5 * Sox10 up vs E11.5 * Ctrl |
| 10439991 | Tfg           | NM_019678    | 4.12601e-005 | 1.18924 | E11.5 * Sox10 up vs E11.5 * Ctrl |
| 10375501 | ---           | ---          | 0.00993254   | 1.18921 | E11.5 * Sox10 up vs E11.5 * Ctrl |
| 10429972 | Cpsf1         | NM_053193    | 0.000467783  | 1.18919 | E11.5 * Sox10 up vs E11.5 * Ctrl |
| 10524124 | Golga3        | NM_008146    | 0.000480036  | 1.18889 | E11.5 * Sox10 up vs E11.5 * Ctrl |
| 10350684 | Arpc5         | NM_026369    | 0.00938843   | 1.18886 | E11.5 * Sox10 up vs E11.5 * Ctrl |
| 10479560 | Rtel1         | NM_001001882 | 0.00404933   | 1.18857 | E11.5 * Sox10 up vs E11.5 * Ctrl |
| 10578539 | Slc25a4       | NM_007450    | 4.0236e-005  | 1.18856 | E11.5 * Sox10 up vs E11.5 * Ctrl |
| 10574996 | Prmt7         | NM_145404    | 0.00170984   | 1.18824 | E11.5 * Sox10 up vs E11.5 * Ctrl |
| 10587012 | Ccpg1         | NM_001114328 | 0.0089596    | 1.18799 | E11.5 * Sox10 up vs E11.5 * Ctrl |
| 10558345 | Dock1         | NM_001033420 | 0.00161125   | 1.18799 | E11.5 * Sox10 up vs E11.5 * Ctrl |
| 10580534 | ---           | ---          | 0.00542441   | 1.18784 | E11.5 * Sox10 up vs E11.5 * Ctrl |
| 10478754 | Arfgef2       | NM_001085495 | 0.00136428   | 1.18771 | E11.5 * Sox10 up vs E11.5 * Ctrl |
| 10529425 | Nop14         | NM_029278    | 0.00058998   | 1.1874  | E11.5 * Sox10 up vs E11.5 * Ctrl |
| 10555414 | Rab6          | NM_024287    | 0.00785701   | 1.1874  | E11.5 * Sox10 up vs E11.5 * Ctrl |
| 10604763 | Arpc1b        | NM_023142    | 0.00969769   | 1.18739 | E11.5 * Sox10 up vs E11.5 * Ctrl |
| 10522676 | Srp72         | NM_025691    | 0.0010053    | 1.18725 | E11.5 * Sox10 up vs E11.5 * Ctrl |
| 10420532 | Atp8a2        | NM_015803    | 0.00603286   | 1.18721 | E11.5 * Sox10 up vs E11.5 * Ctrl |
| 10397311 | Dlst          | NM_030225    | 0.00475234   | 1.1872  | E11.5 * Sox10 up vs E11.5 * Ctrl |
| 10578019 | Nudc          | NM_010948    | 0.00220045   | 1.18716 | E11.5 * Sox10 up vs E11.5 * Ctrl |
| 10603702 | Llph          | NM_025431    | 0.00201666   | 1.1869  | E11.5 * Sox10 up vs E11.5 * Ctrl |
| 10546113 | Sec61a1       | NM_016906    | 0.000556571  | 1.1869  | E11.5 * Sox10 up vs E11.5 * Ctrl |
| 10367772 | Samd5         | NM_177271    | 0.00771003   | 1.18669 | E11.5 * Sox10 up vs E11.5 * Ctrl |
| 10607524 | Sms           | NM_009214    | 0.00084357   | 1.18667 | E11.5 * Sox10 up vs E11.5 * Ctrl |
| 10515293 | Llph          | NM_025431    | 0.00613503   | 1.18648 | E11.5 * Sox10 up vs E11.5 * Ctrl |
| 10486616 | Ubr1          | NM_009461    | 0.00386601   | 1.18633 | E11.5 * Sox10 up vs E11.5 * Ctrl |
| 10545658 | Wdr54         | NM_023790    | 0.000453984  | 1.18628 | E11.5 * Sox10 up vs E11.5 * Ctrl |
| 10533849 | Rilpl1        | NM_021430    | 0.00612028   | 1.18593 | E11.5 * Sox10 up vs E11.5 * Ctrl |
| 10352178 | Sccpdh        | NM_178653    | 0.00858529   | 1.18584 | E11.5 * Sox10 up vs E11.5 * Ctrl |
| 10591423 | Fdx1l         | NM_001039824 | 0.00902779   | 1.18577 | E11.5 * Sox10 up vs E11.5 * Ctrl |
| 10580391 | Itfg1         | NM_028007    | 0.000279328  | 1.18564 | E11.5 * Sox10 up vs E11.5 * Ctrl |
| 10499394 | Lmna          | NM_001002011 | 0.00900032   | 1.18556 | E11.5 * Sox10 up vs E11.5 * Ctrl |
| 10585201 | Timm8b        | NM_013897    | 0.00176799   | 1.1855  | E11.5 * Sox10 up vs E11.5 * Ctrl |
| 10512851 | Erp44         | NM_029572    | 0.0054549    | 1.18537 | E11.5 * Sox10 up vs E11.5 * Ctrl |
| 10523206 | Uso1          | NM_019490    | 0.000387841  | 1.18532 | E11.5 * Sox10 up vs E11.5 * Ctrl |
| 10478997 | Tcfap2c       | NM_009335    | 0.00147957   | 1.18525 | E11.5 * Sox10 up vs E11.5 * Ctrl |
| 10356657 | Ndufa10       | NM_024197    | 0.000546754  | 1.18487 | E11.5 * Sox10 up vs E11.5 * Ctrl |
| 10551760 | Zfp84         | NM_023750    | 0.00823873   | 1.18484 | E11.5 * Sox10 up vs E11.5 * Ctrl |
| 10502165 | Sec24b        | NM_207209    | 1.20803e-005 | 1.18483 | E11.5 * Sox10 up vs E11.5 * Ctrl |
| 10472300 | Psmd14        | NM_021526    | 0.00118776   | 1.1843  | E11.5 * Sox10 up vs E11.5 * Ctrl |
| 10569441 | Nap1l4        | NM_008672    | 0.00184141   | 1.18424 | E11.5 * Sox10 up vs E11.5 * Ctrl |
| 10435784 | BC002163      | NR_002445    | 0.00115834   | 1.18405 | E11.5 * Sox10 up vs E11.5 * Ctrl |
| 10405662 | Mak10         | NM_030153    | 0.000186238  | 1.18372 | E11.5 * Sox10 up vs E11.5 * Ctrl |
| 10365230 | Tdg           | NM_172552    | 0.00210565   | 1.18372 | E11.5 * Sox10 up vs E11.5 * Ctrl |
| 10357164 | Epb4.1l5      | NM_145506    | 0.000560214  | 1.18371 | E11.5 * Sox10 up vs E11.5 * Ctrl |
| 10435162 | Lrch3         | NM_001081255 | 0.00349562   | 1.18365 | E11.5 * Sox10 up vs E11.5 * Ctrl |
| 10368930 | 1700021F05Rik | NM_026411    | 0.0023069    | 1.1836  | E11.5 * Sox10 up vs E11.5 * Ctrl |
| 10582201 | Cox4nb        | NM_010926    | 0.00101411   | 1.18353 | E11.5 * Sox10 up vs E11.5 * Ctrl |
| 10560842 | Zfp94         | NM_009568    | 0.00271509   | 1.18347 | E11.5 * Sox10 up vs E11.5 * Ctrl |
| 10391242 | Rab5c         | NM_024456    | 0.00316287   | 1.18306 | E11.5 * Sox10 up vs E11.5 * Ctrl |
| 10451918 | Ubxn6         | NM_024432    | 0.00115999   | 1.183   | E11.5 * Sox10 up vs E11.5 * Ctrl |
| 10501265 | Gnai3         | NM_010306    | 0.000122159  | 1.18268 | E11.5 * Sox10 up vs E11.5 * Ctrl |
| 10553833 | Ndn           | NM_010882    | 0.00971436   | 1.18261 | E11.5 * Sox10 up vs E11.5 * Ctrl |
| 10597920 | Zdhhc3        | NM_026917    | 0.000578772  | 1.18248 | E11.5 * Sox10 up vs E11.5 * Ctrl |
| 10430945 | Poldip3       | NM_178627    | 0.00263954   | 1.1824  | E11.5 * Sox10 up vs E11.5 * Ctrl |
| 10371676 | Utp20         | NM_175158    | 0.00116852   | 1.1822  | E11.5 * Sox10 up vs E11.5 * Ctrl |
| 10476056 | AU015228      | NM_001033197 | 0.00858408   | 1.18209 | E11.5 * Sox10 up vs E11.5 * Ctrl |
| 10529118 | Eif2b4        | NM_001127356 | 0.00669979   | 1.18204 | E11.5 * Sox10 up vs E11.5 * Ctrl |
| 10515536 | Ipo13         | NM_146152    | 0.00433243   | 1.18191 | E11.5 * Sox10 up vs E11.5 * Ctrl |
| 10418720 | Mettl6        | NM_025907    | 0.00479987   | 1.18187 | E11.5 * Sox10 up vs E11.5 * Ctrl |
| 10403511 | Heatr1        | NM_144835    | 0.000432787  | 1.18182 | E11.5 * Sox10 up vs E11.5 * Ctrl |
| 10487359 | Itprlp1       | BC130218     | 0.000146884  | 1.18174 | E11.5 * Sox10 up vs E11.5 * Ctrl |
| 10546217 | Chchd6        | NM_025351    | 0.00312736   | 1.18164 | E11.5 * Sox10 up vs E11.5 * Ctrl |
| 10390653 | Med24         | NM_011869    | 0.00151612   | 1.18138 | E11.5 * Sox10 up vs E11.5 * Ctrl |
| 10593159 | Pafah1b2      | NM_008775    | 0.00160201   | 1.18138 | E11.5 * Sox10 up vs E11.5 * Ctrl |

|                        |              |              |         |                                  |
|------------------------|--------------|--------------|---------|----------------------------------|
| 10468022 Mrpl43        | NM_053164    | 0.000920169  | 1.18134 | E11.5 * Sox10 up vs E11.5 * Ctrl |
| 10493247 Ubqln4        | NM_033526    | 0.00534428   | 1.18104 | E11.5 * Sox10 up vs E11.5 * Ctrl |
| 10591369 Dnmt1         | NM_010066    | 0.000840754  | 1.18084 | E11.5 * Sox10 up vs E11.5 * Ctrl |
| 10601760 Hnrnp2        | NM_019868    | 0.00482366   | 1.18074 | E11.5 * Sox10 up vs E11.5 * Ctrl |
| 10360764 Enah          | NM_010135    | 0.00118337   | 1.18067 | E11.5 * Sox10 up vs E11.5 * Ctrl |
| 10527012 Lfng          | NM_008494    | 0.00264087   | 1.18048 | E11.5 * Sox10 up vs E11.5 * Ctrl |
| 10372965 Usp15         | NM_027604    | 0.000361214  | 1.18046 | E11.5 * Sox10 up vs E11.5 * Ctrl |
| 10471608 Cep110        | NM_012018    | 0.0041318    | 1.18043 | E11.5 * Sox10 up vs E11.5 * Ctrl |
| 10589503 261000217Rik  | NM_001081381 | 0.00624709   | 1.18035 | E11.5 * Sox10 up vs E11.5 * Ctrl |
| 10576696 Insr          | NM_010568    | 0.00114509   | 1.18031 | E11.5 * Sox10 up vs E11.5 * Ctrl |
| 10488482 Acss1         | NM_080575    | 0.00537831   | 1.18007 | E11.5 * Sox10 up vs E11.5 * Ctrl |
| 10562251 Scn1b         | NM_011322    | 0.00131803   | 1.17995 | E11.5 * Sox10 up vs E11.5 * Ctrl |
| 10529794 EG636612      | XR_001803    | 0.00425406   | 1.17979 | E11.5 * Sox10 up vs E11.5 * Ctrl |
| 10543369 Cadps2        | NM_153163    | 0.00551796   | 1.17975 | E11.5 * Sox10 up vs E11.5 * Ctrl |
| 10497587 1600012F09Rik | NM_025904    | 0.00449183   | 1.17967 | E11.5 * Sox10 up vs E11.5 * Ctrl |
| 10455578 Comm10        | NM_178377    | 0.00753318   | 1.17965 | E11.5 * Sox10 up vs E11.5 * Ctrl |
| 10596347 Atp2c1        | NM_175025    | 0.0008436    | 1.17961 | E11.5 * Sox10 up vs E11.5 * Ctrl |
| 10565968 Atg16l2       | NM_001111111 | 0.00611849   | 1.17954 | E11.5 * Sox10 up vs E11.5 * Ctrl |
| 10446928 Ltbp1         | NM_019919    | 0.00601501   | 1.17945 | E11.5 * Sox10 up vs E11.5 * Ctrl |
| 10462100 Sarnp         | NM_025364    | 0.00430059   | 1.17912 | E11.5 * Sox10 up vs E11.5 * Ctrl |
| 10509620 Capzb         | NM_001037761 | 0.0097537    | 1.17898 | E11.5 * Sox10 up vs E11.5 * Ctrl |
| 10528170 Cysc          | NM_007808    | 0.000609362  | 1.17869 | E11.5 * Sox10 up vs E11.5 * Ctrl |
| 10459405 Nars          | NM_001142950 | 0.000138531  | 1.17865 | E11.5 * Sox10 up vs E11.5 * Ctrl |
| 10433352 Ubn1          | NM_026666    | 0.00444451   | 1.17854 | E11.5 * Sox10 up vs E11.5 * Ctrl |
| 10541191 Rad52         | NM_011236    | 0.00635748   | 1.17822 | E11.5 * Sox10 up vs E11.5 * Ctrl |
| 10606609 Tspan6        | NM_019656    | 0.0068328    | 1.17814 | E11.5 * Sox10 up vs E11.5 * Ctrl |
| 10594480 Rab11a        | NM_017382    | 0.000592756  | 1.1781  | E11.5 * Sox10 up vs E11.5 * Ctrl |
| 10475420 Trim69        | NM_080510    | 0.00741999   | 1.17791 | E11.5 * Sox10 up vs E11.5 * Ctrl |
| 10472212 Pkp4          | NM_026361    | 0.00184655   | 1.17784 | E11.5 * Sox10 up vs E11.5 * Ctrl |
| 10493770 Ilf2          | NM_026374    | 0.00335058   | 1.17783 | E11.5 * Sox10 up vs E11.5 * Ctrl |
| 10352459 Rab3gap2      | BC057872     | 0.00862775   | 1.1777  | E11.5 * Sox10 up vs E11.5 * Ctrl |
| 10367708 Pcmt1         | NM_008786    | 0.00181292   | 1.17758 | E11.5 * Sox10 up vs E11.5 * Ctrl |
| 10547251 Bms1          | NM_194339    | 0.00528345   | 1.17752 | E11.5 * Sox10 up vs E11.5 * Ctrl |
| 10368883 Tdg           | NM_011561    | 0.00298232   | 1.17742 | E11.5 * Sox10 up vs E11.5 * Ctrl |
| 10496737 Bcl10         | NM_009740    | 0.000951186  | 1.17727 | E11.5 * Sox10 up vs E11.5 * Ctrl |
| 10476668 Csrp2bp       | NM_181417    | 0.00443157   | 1.17705 | E11.5 * Sox10 up vs E11.5 * Ctrl |
| 10439878 Psmc1         | NM_008947    | 0.00907983   | 1.17705 | E11.5 * Sox10 up vs E11.5 * Ctrl |
| 10597288 Mlh1          | NM_026810    | 0.00962644   | 1.17672 | E11.5 * Sox10 up vs E11.5 * Ctrl |
| 10420131 Rabggta       | NM_019519    | 0.00519748   | 1.1765  | E11.5 * Sox10 up vs E11.5 * Ctrl |
| 10437687 Litaf         | NM_019980    | 0.00123083   | 1.17647 | E11.5 * Sox10 up vs E11.5 * Ctrl |
| 10434233 Ufd1l         | NM_011672    | 0.000235237  | 1.17609 | E11.5 * Sox10 up vs E11.5 * Ctrl |
| 10605919 Pja1          | NM_001083110 | 0.000199251  | 1.17577 | E11.5 * Sox10 up vs E11.5 * Ctrl |
| 10603431 Suv39h1       | NM_011514    | 0.00510981   | 1.17575 | E11.5 * Sox10 up vs E11.5 * Ctrl |
| 10375926 Ppp2ca        | NM_019411    | 9.10092e-005 | 1.1757  | E11.5 * Sox10 up vs E11.5 * Ctrl |
| 10348558 Scly          | NM_016717    | 0.00559727   | 1.17548 | E11.5 * Sox10 up vs E11.5 * Ctrl |
| 10506680 Tmem48        | NM_028355    | 0.00719409   | 1.17529 | E11.5 * Sox10 up vs E11.5 * Ctrl |
| 10570373 Tfdp1         | NM_009361    | 0.00127871   | 1.17507 | E11.5 * Sox10 up vs E11.5 * Ctrl |
| 10441987 Chd1          | NM_007690    | 0.000155277  | 1.17504 | E11.5 * Sox10 up vs E11.5 * Ctrl |
| 10437748 Gspt1         | NM_146066    | 0.000109081  | 1.17486 | E11.5 * Sox10 up vs E11.5 * Ctrl |
| 10556169 Eif3f         | NM_025344    | 0.00226113   | 1.17473 | E11.5 * Sox10 up vs E11.5 * Ctrl |
| 10402841 Brf1          | NM_028193    | 0.00776729   | 1.17471 | E11.5 * Sox10 up vs E11.5 * Ctrl |
| 10462791 March5        | NM_027314    | 0.00483438   | 1.17466 | E11.5 * Sox10 up vs E11.5 * Ctrl |
| 10387992 Nup88         | NM_172394    | 0.000185253  | 1.17455 | E11.5 * Sox10 up vs E11.5 * Ctrl |
| 10461898 Rfk           | NM_019437    | 0.00771668   | 1.17454 | E11.5 * Sox10 up vs E11.5 * Ctrl |
| 10575129 Vps4a         | NM_126165    | 0.00151563   | 1.17449 | E11.5 * Sox10 up vs E11.5 * Ctrl |
| 10403903 Trim27        | NM_009054    | 0.00277794   | 1.17423 | E11.5 * Sox10 up vs E11.5 * Ctrl |
| 10464836 Actn3         | NM_013456    | 0.00510315   | 1.17422 | E11.5 * Sox10 up vs E11.5 * Ctrl |
| 10511258 Fam132a       | NM_026125    | 0.00451998   | 1.17394 | E11.5 * Sox10 up vs E11.5 * Ctrl |
| 10513583 Cdc26         | NM_139291    | 0.00671888   | 1.17388 | E11.5 * Sox10 up vs E11.5 * Ctrl |
| 10390153 Myst2         | NM_177619    | 0.00270969   | 1.17385 | E11.5 * Sox10 up vs E11.5 * Ctrl |
| 10450669 Prr3          | NM_145487    | 9.79897e-005 | 1.17377 | E11.5 * Sox10 up vs E11.5 * Ctrl |
| 10528268 Ptpn12        | NM_011203    | 0.00116246   | 1.17355 | E11.5 * Sox10 up vs E11.5 * Ctrl |
| 10564663 Tdg           | NM_172552    | 0.0100359    | 1.17332 | E11.5 * Sox10 up vs E11.5 * Ctrl |
| 10492671 Ppid          | NM_026352    | 0.000956915  | 1.17315 | E11.5 * Sox10 up vs E11.5 * Ctrl |
| 10601915 BC031748      | BC031748     | 0.00836761   | 1.17307 | E11.5 * Sox10 up vs E11.5 * Ctrl |
| 10516640 Eif3i         | NM_018799    | 0.00349613   | 1.17277 | E11.5 * Sox10 up vs E11.5 * Ctrl |

|          |          |              |              |         |                                  |
|----------|----------|--------------|--------------|---------|----------------------------------|
| 10446693 | Wdr43    | AK129031     | 0.000496548  | 1.17248 | E11.5 * Sox10 up vs E11.5 * Ctrl |
| 10533285 | Ptpn11   | NM_011202    | 0.00306341   | 1.1723  | E11.5 * Sox10 up vs E11.5 * Ctrl |
| 10394288 | Itsn2    | NM_011365    | 0.00600287   | 1.17224 | E11.5 * Sox10 up vs E11.5 * Ctrl |
| 10368229 | Tbpl1    | NM_011603    | 0.00987341   | 1.17183 | E11.5 * Sox10 up vs E11.5 * Ctrl |
| 10533659 | Clip1    | NM_019765    | 0.00024176   | 1.17167 | E11.5 * Sox10 up vs E11.5 * Ctrl |
| 10413138 | Vdac2    | NM_011695    | 0.00100988   | 1.17141 | E11.5 * Sox10 up vs E11.5 * Ctrl |
| 10594645 | Rab8b    | NM_173413    | 0.00727346   | 1.17139 | E11.5 * Sox10 up vs E11.5 * Ctrl |
| 10460833 | Ehd1     | NM_010119    | 0.00136221   | 1.17112 | E11.5 * Sox10 up vs E11.5 * Ctrl |
| 10551496 | Paf1     | NM_019458    | 0.00114243   | 1.17107 | E11.5 * Sox10 up vs E11.5 * Ctrl |
| 10586920 | Rfx7     | NM_001033536 | 0.00182919   | 1.17106 | E11.5 * Sox10 up vs E11.5 * Ctrl |
| 10388269 | ---      | ---          | 0.00130658   | 1.17093 | E11.5 * Sox10 up vs E11.5 * Ctrl |
| 10422852 | Rpl19    | NM_009078    | 1.72281e-005 | 1.17078 | E11.5 * Sox10 up vs E11.5 * Ctrl |
| 10452496 | Ralbp1   | NM_009067    | 0.00404039   | 1.17065 | E11.5 * Sox10 up vs E11.5 * Ctrl |
| 10480057 | Rbm17    | NM_152824    | 0.00105476   | 1.17049 | E11.5 * Sox10 up vs E11.5 * Ctrl |
| 10566225 | Olfr616  | NM_147099    | 0.00401787   | 1.16999 | E11.5 * Sox10 up vs E11.5 * Ctrl |
| 10363706 | Jmjd1c   | NM_207221    | 0.0089112    | 1.16985 | E11.5 * Sox10 up vs E11.5 * Ctrl |
| 10474545 | Slc12a6  | NM_133649    | 0.0074391    | 1.16979 | E11.5 * Sox10 up vs E11.5 * Ctrl |
| 10577070 | Tubgcp3  | NM_198031    | 0.00217634   | 1.16944 | E11.5 * Sox10 up vs E11.5 * Ctrl |
| 10460112 | ---      | ---          | 0.00949241   | 1.16903 | E11.5 * Sox10 up vs E11.5 * Ctrl |
| 10447395 | Msh2     | NM_008628    | 0.00247352   | 1.16867 | E11.5 * Sox10 up vs E11.5 * Ctrl |
| 10583697 | Smarca4  | NM_011417    | 0.00425448   | 1.16859 | E11.5 * Sox10 up vs E11.5 * Ctrl |
| 10482323 | Ppp6c    | NM_024209    | 0.00769976   | 1.16825 | E11.5 * Sox10 up vs E11.5 * Ctrl |
| 10520025 | Psmc2    | NM_011188    | 9.78517e-005 | 1.16802 | E11.5 * Sox10 up vs E11.5 * Ctrl |
| 10502058 | BC002199 | NM_145964    | 0.000597204  | 1.16771 | E11.5 * Sox10 up vs E11.5 * Ctrl |
| 10589723 | Lrrfip2  | NM_027742    | 0.00809182   | 1.1675  | E11.5 * Sox10 up vs E11.5 * Ctrl |
| 10362036 | Hbs1l    | NM_019702    | 7.77892e-005 | 1.16743 | E11.5 * Sox10 up vs E11.5 * Ctrl |
| 10605090 | Idh3g    | NM_008323    | 0.00149511   | 1.16738 | E11.5 * Sox10 up vs E11.5 * Ctrl |
| 10493891 | Ywhaz    | NM_011740    | 3.14511e-006 | 1.16734 | E11.5 * Sox10 up vs E11.5 * Ctrl |
| 10512136 | Bag1     | NM_009736    | 0.000469433  | 1.16707 | E11.5 * Sox10 up vs E11.5 * Ctrl |
| 10489831 | Stau1    | NM_001109906 | 0.00198904   | 1.16651 | E11.5 * Sox10 up vs E11.5 * Ctrl |
| 10545932 | Snrnp27  | NM_025665    | 0.00602945   | 1.16604 | E11.5 * Sox10 up vs E11.5 * Ctrl |
| 10438112 | Pi4ka    | NM_001001983 | 0.00062693   | 1.16595 | E11.5 * Sox10 up vs E11.5 * Ctrl |
| 10470268 | Pmpca    | NM_173180    | 0.00464308   | 1.16567 | E11.5 * Sox10 up vs E11.5 * Ctrl |
| 10531970 | EG545790 | XM_620236    | 0.000785654  | 1.16546 | E11.5 * Sox10 up vs E11.5 * Ctrl |
| 10579874 | Abce1    | NM_015751    | 0.00269477   | 1.16527 | E11.5 * Sox10 up vs E11.5 * Ctrl |
| 10430871 | Tdg      | NM_011561    | 0.00331106   | 1.16509 | E11.5 * Sox10 up vs E11.5 * Ctrl |
| 10433910 | Top3b    | NM_011624    | 0.00541126   | 1.16508 | E11.5 * Sox10 up vs E11.5 * Ctrl |
| 10432593 | Csrnp2   | NM_153407    | 4.52638e-005 | 1.16462 | E11.5 * Sox10 up vs E11.5 * Ctrl |
| 10564736 | Polg     | NM_017462    | 0.00671397   | 1.16462 | E11.5 * Sox10 up vs E11.5 * Ctrl |
| 10508376 | Trim62   | NM_178110    | 0.00243831   | 1.16414 | E11.5 * Sox10 up vs E11.5 * Ctrl |
| 10535331 | Mmd2     | NM_175217    | 0.0103567    | 1.16411 | E11.5 * Sox10 up vs E11.5 * Ctrl |
| 10389674 | Dynll2   | NM_026556    | 0.000673034  | 1.16401 | E11.5 * Sox10 up vs E11.5 * Ctrl |
| 10576506 | Gnpat    | NM_010322    | 0.00824272   | 1.16388 | E11.5 * Sox10 up vs E11.5 * Ctrl |
| 10353420 | Mcm3     | NM_008563    | 0.00208452   | 1.16369 | E11.5 * Sox10 up vs E11.5 * Ctrl |
| 10440600 | Cct8     | NM_009840    | 0.000152441  | 1.16358 | E11.5 * Sox10 up vs E11.5 * Ctrl |
| 10446402 | Ppp4r1   | NM_146081    | 0.00724555   | 1.1633  | E11.5 * Sox10 up vs E11.5 * Ctrl |
| 10348004 | Psmd1    | NM_027357    | 3.79781e-005 | 1.16315 | E11.5 * Sox10 up vs E11.5 * Ctrl |
| 10421981 | Dis3     | NM_028315    | 0.00436824   | 1.16304 | E11.5 * Sox10 up vs E11.5 * Ctrl |
| 10382284 | Prkar1a  | NM_021880    | 0.00262332   | 1.16293 | E11.5 * Sox10 up vs E11.5 * Ctrl |
| 10384662 | Comm1d1  | NM_144514    | 0.00102437   | 1.16279 | E11.5 * Sox10 up vs E11.5 * Ctrl |
| 10517465 | Kdm1     | NM_133872    | 0.000132116  | 1.16273 | E11.5 * Sox10 up vs E11.5 * Ctrl |
| 10356800 | Hdlbp    | NM_133808    | 2.77959e-005 | 1.16271 | E11.5 * Sox10 up vs E11.5 * Ctrl |
| 10527559 | Polr1d   | NM_009087    | 0.00838686   | 1.16242 | E11.5 * Sox10 up vs E11.5 * Ctrl |
| 10454298 | Zfp397   | NM_027007    | 0.000945413  | 1.16236 | E11.5 * Sox10 up vs E11.5 * Ctrl |
| 10569898 | Evi5l    | NM_001039578 | 0.00241298   | 1.16226 | E11.5 * Sox10 up vs E11.5 * Ctrl |
| 10579969 | Zfp330   | NM_145600    | 0.00117059   | 1.16202 | E11.5 * Sox10 up vs E11.5 * Ctrl |
| 10395788 | Srp54c   | NM_001100110 | 0.000132441  | 1.16201 | E11.5 * Sox10 up vs E11.5 * Ctrl |
| 10378802 | Blmh     | NM_178645    | 0.000173826  | 1.16192 | E11.5 * Sox10 up vs E11.5 * Ctrl |
| 10512111 | Smu1     | NM_021535    | 0.000546141  | 1.16159 | E11.5 * Sox10 up vs E11.5 * Ctrl |
| 10417664 | Rpl19    | NM_009078    | 0.00154713   | 1.16141 | E11.5 * Sox10 up vs E11.5 * Ctrl |
| 10405693 | Dapk1    | NM_029653    | 1.55518e-005 | 1.16134 | E11.5 * Sox10 up vs E11.5 * Ctrl |
| 10484318 | Nckap1   | NM_016965    | 0.00337919   | 1.16133 | E11.5 * Sox10 up vs E11.5 * Ctrl |
| 10384192 | Tbrg4    | NM_134011    | 0.00262299   | 1.1613  | E11.5 * Sox10 up vs E11.5 * Ctrl |
| 10405125 | Fbxw17   | NM_175401    | 0.00894406   | 1.16088 | E11.5 * Sox10 up vs E11.5 * Ctrl |
| 10371877 | Slc25a3  | NM_133668    | 0.00012707   | 1.16073 | E11.5 * Sox10 up vs E11.5 * Ctrl |
| 10596190 | Bfsp2    | NM_001002896 | 0.00795225   | 1.16068 | E11.5 * Sox10 up vs E11.5 * Ctrl |

|          |               |               |              |         |                                  |
|----------|---------------|---------------|--------------|---------|----------------------------------|
| 10589756 | Epm2aip1      | NM_175266     | 0.00516326   | 1.16064 | E11.5 * Sox10 up vs E11.5 * Ctrl |
| 10520417 | Gm1040        | ENSMUST000001 | 0.00772339   | 1.1605  | E11.5 * Sox10 up vs E11.5 * Ctrl |
| 10392183 | Ern1          | NM_023913     | 0.00580913   | 1.16039 | E11.5 * Sox10 up vs E11.5 * Ctrl |
| 10421922 | ---           | ---           | 0.00839845   | 1.16007 | E11.5 * Sox10 up vs E11.5 * Ctrl |
| 10573637 | Phkb          | NM_199446     | 0.00637315   | 1.16006 | E11.5 * Sox10 up vs E11.5 * Ctrl |
| 10416940 | Tpm3          | ENSMUST000002 | 3.36193e-005 | 1.15995 | E11.5 * Sox10 up vs E11.5 * Ctrl |
| 10570625 | Rpl19         | NM_009078     | 3.46237e-005 | 1.15964 | E11.5 * Sox10 up vs E11.5 * Ctrl |
| 10488031 | ---           | ---           | 0.00578717   | 1.15902 | E11.5 * Sox10 up vs E11.5 * Ctrl |
| 10424340 | Ndufb9        | NM_023172     | 0.00200712   | 1.15895 | E11.5 * Sox10 up vs E11.5 * Ctrl |
| 10559270 | Tssc4         | NM_020285     | 0.00763364   | 1.15884 | E11.5 * Sox10 up vs E11.5 * Ctrl |
| 10503401 | Tmem55a       | NM_028264     | 0.00209343   | 1.15855 | E11.5 * Sox10 up vs E11.5 * Ctrl |
| 10565479 | I7Rn6         | NM_026304     | 0.00822326   | 1.1581  | E11.5 * Sox10 up vs E11.5 * Ctrl |
| 10479026 | Rae1          | NM_175112     | 0.000573907  | 1.15791 | E11.5 * Sox10 up vs E11.5 * Ctrl |
| 10472313 | Tbr1          | NM_009322     | 0.000418412  | 1.15779 | E11.5 * Sox10 up vs E11.5 * Ctrl |
| 10526726 | Zkscan1       | NM_133906     | 0.00596773   | 1.15772 | E11.5 * Sox10 up vs E11.5 * Ctrl |
| 10590438 | C730027P07Rik | NM_177743     | 0.00714843   | 1.15767 | E11.5 * Sox10 up vs E11.5 * Ctrl |
| 10423842 | Wdsof1        | NM_198606     | 0.00288366   | 1.15726 | E11.5 * Sox10 up vs E11.5 * Ctrl |
| 10428052 | Cct5          | NM_007637     | 1.41858e-006 | 1.1567  | E11.5 * Sox10 up vs E11.5 * Ctrl |
| 10456995 | Txn14a        | NM_178604     | 0.00756458   | 1.15665 | E11.5 * Sox10 up vs E11.5 * Ctrl |
| 10542229 | ---           | ---           | 0.00882251   | 1.15658 | E11.5 * Sox10 up vs E11.5 * Ctrl |
| 10411646 | Gtf2h2        | NM_022011     | 0.00673045   | 1.15649 | E11.5 * Sox10 up vs E11.5 * Ctrl |
| 10386058 | Sparc         | NM_009242     | 0.00296219   | 1.15645 | E11.5 * Sox10 up vs E11.5 * Ctrl |
| 10521587 | Dnaja1        | NM_008298     | 0.00016974   | 1.15588 | E11.5 * Sox10 up vs E11.5 * Ctrl |
| 10418991 | Gcap14        | NM_027045     | 0.0096986    | 1.15585 | E11.5 * Sox10 up vs E11.5 * Ctrl |
| 10395739 | Srp54b        | NM_001100109  | 4.40481e-005 | 1.15585 | E11.5 * Sox10 up vs E11.5 * Ctrl |
| 10385790 | Hspa4         | NM_008300     | 0.000326392  | 1.15551 | E11.5 * Sox10 up vs E11.5 * Ctrl |
| 10347917 | Rpl19         | NM_009078     | 0.000291733  | 1.15539 | E11.5 * Sox10 up vs E11.5 * Ctrl |
| 10498415 | Dhx36         | NM_028136     | 0.00898348   | 1.15526 | E11.5 * Sox10 up vs E11.5 * Ctrl |
| 10519392 | Krit1         | NM_030675     | 0.00534827   | 1.15503 | E11.5 * Sox10 up vs E11.5 * Ctrl |
| 10456194 | Napg          | NM_028017     | 0.00581273   | 1.15463 | E11.5 * Sox10 up vs E11.5 * Ctrl |
| 10522668 | Paics         | NM_025939     | 0.00231371   | 1.15458 | E11.5 * Sox10 up vs E11.5 * Ctrl |
| 10461268 | 1810009A15Rik | BC047099      | 0.00524064   | 1.15454 | E11.5 * Sox10 up vs E11.5 * Ctrl |
| 10520815 | Slc4a1ap      | NM_009206     | 0.00509457   | 1.15421 | E11.5 * Sox10 up vs E11.5 * Ctrl |
| 10503150 | Rab2a         | NM_021518     | 2.7266e-006  | 1.15404 | E11.5 * Sox10 up vs E11.5 * Ctrl |
| 10589982 | Azi2          | NM_013727     | 0.00614332   | 1.15355 | E11.5 * Sox10 up vs E11.5 * Ctrl |
| 10581363 | Cenpt         | NM_177150     | 0.00400829   | 1.15317 | E11.5 * Sox10 up vs E11.5 * Ctrl |
| 10604501 | Hnrnpf        | NM_133834     | 0.000357567  | 1.15315 | E11.5 * Sox10 up vs E11.5 * Ctrl |
| 10408684 | Tmed10        | NM_026775     | 1.51704e-006 | 1.15225 | E11.5 * Sox10 up vs E11.5 * Ctrl |
| 10398695 | Mark3         | NM_021516     | 0.00215551   | 1.15213 | E11.5 * Sox10 up vs E11.5 * Ctrl |
| 10414522 | Apex1         | NM_009687     | 0.00251388   | 1.15191 | E11.5 * Sox10 up vs E11.5 * Ctrl |
| 10532901 | OTTMUSG00000  | XR_033041     | 0.00226608   | 1.1519  | E11.5 * Sox10 up vs E11.5 * Ctrl |
| 10565288 | Fam108c       | NM_133722     | 0.0072533    | 1.15188 | E11.5 * Sox10 up vs E11.5 * Ctrl |
| 10429944 | Scrt1         | NM_130893     | 0.00543625   | 1.15121 | E11.5 * Sox10 up vs E11.5 * Ctrl |
| 10490370 | Psma7         | NM_011969     | 4.97702e-006 | 1.15111 | E11.5 * Sox10 up vs E11.5 * Ctrl |
| 10362861 | Scml4         | NM_172938     | 0.00557534   | 1.15105 | E11.5 * Sox10 up vs E11.5 * Ctrl |
| 10482017 | Rab14         | NM_026697     | 0.00104195   | 1.15084 | E11.5 * Sox10 up vs E11.5 * Ctrl |
| 10477572 | Chmp4b        | NM_029362     | 0.00511091   | 1.15081 | E11.5 * Sox10 up vs E11.5 * Ctrl |
| 10590253 | Rpsa          | NM_011029     | 0.0100469    | 1.15077 | E11.5 * Sox10 up vs E11.5 * Ctrl |
| 10510624 | Klhl21        | NM_001033352  | 0.00783028   | 1.15051 | E11.5 * Sox10 up vs E11.5 * Ctrl |
| 10598638 | Mid1ip1       | NM_026524     | 0.0080091    | 1.15046 | E11.5 * Sox10 up vs E11.5 * Ctrl |
| 10499879 | Rpl3          | NM_013762     | 0.000837836  | 1.15029 | E11.5 * Sox10 up vs E11.5 * Ctrl |
| 10499881 | Rpl3          | NM_013762     | 0.000837836  | 1.15029 | E11.5 * Sox10 up vs E11.5 * Ctrl |
| 10557148 | Dctn5         | NM_021608     | 0.00306299   | 1.15012 | E11.5 * Sox10 up vs E11.5 * Ctrl |
| 10530434 | Commmd8       | NM_178599     | 0.00521914   | 1.15003 | E11.5 * Sox10 up vs E11.5 * Ctrl |
| 10521174 | Rnf4          | NM_011278     | 0.00633339   | 1.14958 | E11.5 * Sox10 up vs E11.5 * Ctrl |
| 10380833 | Rpl19         | NM_009078     | 7.53713e-005 | 1.14946 | E11.5 * Sox10 up vs E11.5 * Ctrl |
| 10414025 | Gdf10         | NM_145741     | 0.00486257   | 1.14925 | E11.5 * Sox10 up vs E11.5 * Ctrl |
| 10407811 | Hnrnpf        | NM_133834     | 2.17947e-005 | 1.14884 | E11.5 * Sox10 up vs E11.5 * Ctrl |
| 10378154 | Zzef1         | NM_001045536  | 0.00788421   | 1.14875 | E11.5 * Sox10 up vs E11.5 * Ctrl |
| 10487154 | Secisbp2l     | NM_177608     | 0.0073074    | 1.14869 | E11.5 * Sox10 up vs E11.5 * Ctrl |
| 10440406 | Nrip1         | NM_173440     | 0.00760568   | 1.14861 | E11.5 * Sox10 up vs E11.5 * Ctrl |
| 10489266 | Chd6          | NM_173368     | 0.0059853    | 1.14858 | E11.5 * Sox10 up vs E11.5 * Ctrl |
| 10352514 | Eprs          | NM_029735     | 7.09948e-005 | 1.14848 | E11.5 * Sox10 up vs E11.5 * Ctrl |
| 10385495 | Cdk2ap1       | NM_013812     | 0.00772771   | 1.14794 | E11.5 * Sox10 up vs E11.5 * Ctrl |
| 10498623 | Kpna4         | NM_008467     | 0.00698237   | 1.14771 | E11.5 * Sox10 up vs E11.5 * Ctrl |
| 10504470 | Melk          | NM_010790     | 0.00903789   | 1.14764 | E11.5 * Sox10 up vs E11.5 * Ctrl |

|                        |              |              |         |                                  |
|------------------------|--------------|--------------|---------|----------------------------------|
| 10468037               | ---          | 0.0071134    | 1.14752 | E11.5 * Sox10 up vs E11.5 * Ctrl |
| 10512709 Mcart1        | NM_001009949 | 0.00258526   | 1.14751 | E11.5 * Sox10 up vs E11.5 * Ctrl |
| 10375980 Aff4          | NM_033565    | 0.00359401   | 1.14745 | E11.5 * Sox10 up vs E11.5 * Ctrl |
| 10482229 Psmb7         | NM_011187    | 0.00233815   | 1.14727 | E11.5 * Sox10 up vs E11.5 * Ctrl |
| 10483756 Atp5g3        | NM_175015    | 0.00304644   | 1.14727 | E11.5 * Sox10 up vs E11.5 * Ctrl |
| 10407570 Zmynd11       | NM_144516    | 0.00430928   | 1.14724 | E11.5 * Sox10 up vs E11.5 * Ctrl |
| 10425611 Aco2          | NM_080633    | 0.00923509   | 1.14707 | E11.5 * Sox10 up vs E11.5 * Ctrl |
| 10446207 Clpp          | NM_017393    | 0.00896469   | 1.14706 | E11.5 * Sox10 up vs E11.5 * Ctrl |
| 10493565 Adar          | NM_001038587 | 0.00226351   | 1.14658 | E11.5 * Sox10 up vs E11.5 * Ctrl |
| 10358359 Cdc73         | NM_145991    | 0.00152969   | 1.14617 | E11.5 * Sox10 up vs E11.5 * Ctrl |
| 10555063 Ints4         | NM_027256    | 0.00992643   | 1.14616 | E11.5 * Sox10 up vs E11.5 * Ctrl |
| 10473272 Zc3h15        | NM_026934    | 0.003887     | 1.14584 | E11.5 * Sox10 up vs E11.5 * Ctrl |
| 10515352 Akr1a4        | NM_021473    | 0.0028176    | 1.14559 | E11.5 * Sox10 up vs E11.5 * Ctrl |
| 10605222 Irak1         | NM_008363    | 0.00170946   | 1.14559 | E11.5 * Sox10 up vs E11.5 * Ctrl |
| 10429739 Puf60         | NM_028364    | 0.00894379   | 1.14549 | E11.5 * Sox10 up vs E11.5 * Ctrl |
| 10453006 Cebpz         | NM_001024806 | 0.00838329   | 1.14522 | E11.5 * Sox10 up vs E11.5 * Ctrl |
| 10560000 Tpm3          | NM_022314    | 0.00321151   | 1.14522 | E11.5 * Sox10 up vs E11.5 * Ctrl |
| 10561140 Mrpl41        | NM_001031808 | 0.00459467   | 1.14521 | E11.5 * Sox10 up vs E11.5 * Ctrl |
| 10525718 Arl6ip4       | NM_144509    | 0.00320754   | 1.14507 | E11.5 * Sox10 up vs E11.5 * Ctrl |
| 10577866 Ash2l         | NM_011791    | 1.69356e-005 | 1.14484 | E11.5 * Sox10 up vs E11.5 * Ctrl |
| 10447695               | ---          | 0.00482159   | 1.14481 | E11.5 * Sox10 up vs E11.5 * Ctrl |
| 10499425 2700060E02Rik | NM_026528    | 0.000160315  | 1.14471 | E11.5 * Sox10 up vs E11.5 * Ctrl |
| 10425354 Mgat3         | NM_010795    | 0.00777767   | 1.14454 | E11.5 * Sox10 up vs E11.5 * Ctrl |
| 10479627 Tpd52l2       | NM_025482    | 0.00650068   | 1.14451 | E11.5 * Sox10 up vs E11.5 * Ctrl |
| 10460196 1810055G02Rik | NM_028077    | 0.00481654   | 1.14418 | E11.5 * Sox10 up vs E11.5 * Ctrl |
| 10531488 Ccni          | NM_017367    | 0.00595608   | 1.1441  | E11.5 * Sox10 up vs E11.5 * Ctrl |
| 10502714 Bxdc5         | NM_027371    | 0.00127334   | 1.14396 | E11.5 * Sox10 up vs E11.5 * Ctrl |
| 10599461 Calm2         | NM_007589    | 0.00254132   | 1.14396 | E11.5 * Sox10 up vs E11.5 * Ctrl |
| 10447594 Dynl1t1       | NM_009342    | 2.42321e-005 | 1.14364 | E11.5 * Sox10 up vs E11.5 * Ctrl |
| 10454296 Rpl19         | NM_009078    | 0.000263336  | 1.14329 | E11.5 * Sox10 up vs E11.5 * Ctrl |
| 10473574 Olfr1151      | NM_146638    | 0.00965833   | 1.14304 | E11.5 * Sox10 up vs E11.5 * Ctrl |
| 10601164 Nono          | NM_023144    | 0.00509131   | 1.14269 | E11.5 * Sox10 up vs E11.5 * Ctrl |
| 10458823               | ---          | 0.000256962  | 1.14241 | E11.5 * Sox10 up vs E11.5 * Ctrl |
| 10510270 Mthfr         | NM_010840    | 0.00515803   | 1.14238 | E11.5 * Sox10 up vs E11.5 * Ctrl |
| 10487629 Idh3b         | NM_130884    | 0.0016671    | 1.1423  | E11.5 * Sox10 up vs E11.5 * Ctrl |
| 10386495 Tom1l2        | NM_153080    | 0.00971564   | 1.14181 | E11.5 * Sox10 up vs E11.5 * Ctrl |
| 10397476 2310044G17Rik | BC026384     | 0.00600438   | 1.14174 | E11.5 * Sox10 up vs E11.5 * Ctrl |
| 10508974 Pfah2         | NM_133880    | 0.0100887    | 1.14142 | E11.5 * Sox10 up vs E11.5 * Ctrl |
| 10509463 Eif4g3        | NM_172703    | 0.00469122   | 1.14125 | E11.5 * Sox10 up vs E11.5 * Ctrl |
| 10548057 Ndufa9        | NM_025358    | 0.00521793   | 1.14096 | E11.5 * Sox10 up vs E11.5 * Ctrl |
| 10514590 Dock7         | NM_026082    | 0.000630283  | 1.14085 | E11.5 * Sox10 up vs E11.5 * Ctrl |
| 10459705 Smad4         | NM_008540    | 0.000210144  | 1.13997 | E11.5 * Sox10 up vs E11.5 * Ctrl |
| 10580756 2310065K24Rik | NM_028221    | 0.00313929   | 1.13958 | E11.5 * Sox10 up vs E11.5 * Ctrl |
| 10372687 Nup107        | NM_134010    | 0.0063053    | 1.13905 | E11.5 * Sox10 up vs E11.5 * Ctrl |
| 10466374 Tle4          | NM_011600    | 0.0068174    | 1.13888 | E11.5 * Sox10 up vs E11.5 * Ctrl |
| 10457872 Slc39a6       | NM_139143    | 0.00642367   | 1.13881 | E11.5 * Sox10 up vs E11.5 * Ctrl |
| 10560630 Tomm40        | NM_001109748 | 0.0080202    | 1.1388  | E11.5 * Sox10 up vs E11.5 * Ctrl |
| 10356577 Ilkap         | NM_023343    | 0.00993118   | 1.13826 | E11.5 * Sox10 up vs E11.5 * Ctrl |
| 10406417 Actg1         | NM_009609    | 0.00129911   | 1.13823 | E11.5 * Sox10 up vs E11.5 * Ctrl |
| 10415119 Pabpn1        | NM_019402    | 0.00102403   | 1.13759 | E11.5 * Sox10 up vs E11.5 * Ctrl |
| 10473919 Ckap5         | NM_029437    | 0.000675017  | 1.13634 | E11.5 * Sox10 up vs E11.5 * Ctrl |
| 10578287 Cnot7         | NM_011135    | 0.00496493   | 1.13598 | E11.5 * Sox10 up vs E11.5 * Ctrl |
| 10420089 Nedd8         | NM_008683    | 0.0014908    | 1.13596 | E11.5 * Sox10 up vs E11.5 * Ctrl |
| 10422718 Ttc33         | NM_026213    | 0.00864511   | 1.13573 | E11.5 * Sox10 up vs E11.5 * Ctrl |
| 10446109 Safb          | ENSMUST00000 | 0.000809674  | 1.13571 | E11.5 * Sox10 up vs E11.5 * Ctrl |
| 10486322               | ---          | 0.0090155    | 1.13506 | E11.5 * Sox10 up vs E11.5 * Ctrl |
| 10372750 Cand1         | NM_027994    | 0.000496029  | 1.13495 | E11.5 * Sox10 up vs E11.5 * Ctrl |
| 10593367 Dlat          | NM_145614    | 0.00348969   | 1.13489 | E11.5 * Sox10 up vs E11.5 * Ctrl |
| 10478196 Top1          | NM_009408    | 0.000658651  | 1.13471 | E11.5 * Sox10 up vs E11.5 * Ctrl |
| 10531286 Vdac2         | NM_011695    | 0.00159121   | 1.13449 | E11.5 * Sox10 up vs E11.5 * Ctrl |
| 10560282 Grfl1         | NM_172739    | 0.0090284    | 1.13405 | E11.5 * Sox10 up vs E11.5 * Ctrl |
| 10501143 Ahcyl1        | NM_145542    | 0.0017815    | 1.13356 | E11.5 * Sox10 up vs E11.5 * Ctrl |
| 10413304 Arf4          | NM_007479    | 0.00208345   | 1.13351 | E11.5 * Sox10 up vs E11.5 * Ctrl |
| 10466402 Eif4a1        | NM_144958    | 0.00297585   | 1.13349 | E11.5 * Sox10 up vs E11.5 * Ctrl |
| 10356859 Dtymk         | NM_001105667 | 0.0017219    | 1.13326 | E11.5 * Sox10 up vs E11.5 * Ctrl |
| 10503134 Sdcbp         | NM_001098227 | 4.38653e-005 | 1.13315 | E11.5 * Sox10 up vs E11.5 * Ctrl |

|          |               |               |              |         |                                  |
|----------|---------------|---------------|--------------|---------|----------------------------------|
| 10435149 | Fytd1         | NM_027226     | 0.000314006  | 1.13299 | E11.5 * Sox10 up vs E11.5 * Ctrl |
| 10412844 | Top2b         | NM_009409     | 0.00588906   | 1.13241 | E11.5 * Sox10 up vs E11.5 * Ctrl |
| 10450435 | Csnk2b        | NM_009975     | 0.010303     | 1.13227 | E11.5 * Sox10 up vs E11.5 * Ctrl |
| 10586844 | Adam10        | NM_007399     | 0.00318407   | 1.13169 | E11.5 * Sox10 up vs E11.5 * Ctrl |
| 10505182 | Gng10         | NM_025277     | 0.00172602   | 1.13165 | E11.5 * Sox10 up vs E11.5 * Ctrl |
| 10438308 | Ranbp1        | NM_011239     | 0.0026855    | 1.13155 | E11.5 * Sox10 up vs E11.5 * Ctrl |
| 10539177 | Eif4a3        | NM_138669     | 0.00214014   | 1.13143 | E11.5 * Sox10 up vs E11.5 * Ctrl |
| 10451778 | EG328839      | ENSMUST000001 | 0.00918676   | 1.13137 | E11.5 * Sox10 up vs E11.5 * Ctrl |
| 10522716 | Polr2b        | NM_153798     | 0.000343229  | 1.13055 | E11.5 * Sox10 up vs E11.5 * Ctrl |
| 10378848 | Hsp90aa1      | NM_010480     | 0.00132081   | 1.13007 | E11.5 * Sox10 up vs E11.5 * Ctrl |
| 10559853 | Clcn4-2       | NM_011334     | 0.00787698   | 1.12999 | E11.5 * Sox10 up vs E11.5 * Ctrl |
| 10481900 | Rabepk        | NM_145522     | 0.00771554   | 1.12994 | E11.5 * Sox10 up vs E11.5 * Ctrl |
| 10426439 | Pphln1        | NM_146062     | 0.00527371   | 1.1292  | E11.5 * Sox10 up vs E11.5 * Ctrl |
| 10463557 | Gbf1          | NM_178930     | 0.0043823    | 1.12907 | E11.5 * Sox10 up vs E11.5 * Ctrl |
| 10454469 | Ammecr1l      | NM_153515     | 0.00140168   | 1.12851 | E11.5 * Sox10 up vs E11.5 * Ctrl |
| 10417689 | Psmd6         | NM_025550     | 0.0030732    | 1.12837 | E11.5 * Sox10 up vs E11.5 * Ctrl |
| 10583254 | Cwc15         | NM_023153     | 0.00195412   | 1.12829 | E11.5 * Sox10 up vs E11.5 * Ctrl |
| 10485013 | 1110051M20Rik | NM_175123     | 0.00659178   | 1.12765 | E11.5 * Sox10 up vs E11.5 * Ctrl |
| 10427885 | Hnrnpa1       | NM_010447     | 0.00296397   | 1.12738 | E11.5 * Sox10 up vs E11.5 * Ctrl |
| 10368928 | Rpl41         | NM_018860     | 0.000273379  | 1.12709 | E11.5 * Sox10 up vs E11.5 * Ctrl |
| 10412098 | Rpl41         | NM_018860     | 0.000273379  | 1.12709 | E11.5 * Sox10 up vs E11.5 * Ctrl |
| 10591867 | Rpl41         | NM_018860     | 0.000273379  | 1.12709 | E11.5 * Sox10 up vs E11.5 * Ctrl |
| 10541104 | Hnrnpf        | NM_133834     | 1.8211e-005  | 1.12685 | E11.5 * Sox10 up vs E11.5 * Ctrl |
| 10443550 | Rnf8          | NM_021419     | 0.00700402   | 1.12662 | E11.5 * Sox10 up vs E11.5 * Ctrl |
| 10377851 | Psmb6         | NM_008946     | 0.00276478   | 1.12628 | E11.5 * Sox10 up vs E11.5 * Ctrl |
| 10388010 | C1qbp         | NM_007573     | 0.000296203  | 1.12606 | E11.5 * Sox10 up vs E11.5 * Ctrl |
| 10385034 | Rpsa          | NM_011029     | 0.00536643   | 1.12594 | E11.5 * Sox10 up vs E11.5 * Ctrl |
| 10345981 | Ercc5         | NM_011729     | 0.00684952   | 1.1255  | E11.5 * Sox10 up vs E11.5 * Ctrl |
| 10394892 | Cpsf3         | NM_018813     | 0.00745735   | 1.12521 | E11.5 * Sox10 up vs E11.5 * Ctrl |
| 10543031 | Slc25a13      | NM_015829     | 0.00909654   | 1.12512 | E11.5 * Sox10 up vs E11.5 * Ctrl |
| 10452867 | Dpy30         | NM_001146222  | 0.00257527   | 1.12431 | E11.5 * Sox10 up vs E11.5 * Ctrl |
| 10435212 | Osbpl11       | NM_176840     | 0.00721058   | 1.12422 | E11.5 * Sox10 up vs E11.5 * Ctrl |
| 10400581 | Fkbp3         | NM_013902     | 0.00502303   | 1.12406 | E11.5 * Sox10 up vs E11.5 * Ctrl |
| 10504056 | Ubap1         | NM_023305     | 0.00682157   | 1.12251 | E11.5 * Sox10 up vs E11.5 * Ctrl |
| 10390352 | Kpnb1         | NM_008379     | 0.00139575   | 1.1221  | E11.5 * Sox10 up vs E11.5 * Ctrl |
| 10360863 | Mark1         | NM_145515     | 0.00976845   | 1.12182 | E11.5 * Sox10 up vs E11.5 * Ctrl |
| 10371987 | Metap2        | NM_019648     | 0.00132832   | 1.12098 | E11.5 * Sox10 up vs E11.5 * Ctrl |
| 10539741 | Aak1          | NM_001040106  | 0.00148282   | 1.12096 | E11.5 * Sox10 up vs E11.5 * Ctrl |
| 1054501  | Ezh2          | NM_007971     | 0.00664699   | 1.12087 | E11.5 * Sox10 up vs E11.5 * Ctrl |
| 10529142 | Ppm1g         | NM_008014     | 0.00772773   | 1.12061 | E11.5 * Sox10 up vs E11.5 * Ctrl |
| 10348929 | Hnrnpf        | NM_133834     | 4.71325e-005 | 1.12    | E11.5 * Sox10 up vs E11.5 * Ctrl |
| 10411491 | Tnpo1         | NM_178716     | 0.00547938   | 1.11989 | E11.5 * Sox10 up vs E11.5 * Ctrl |
| 10459375 | Txn1l         | NM_016792     | 0.00736992   | 1.11984 | E11.5 * Sox10 up vs E11.5 * Ctrl |
| 10500736 | Vangl1        | NM_177545     | 0.00916151   | 1.11964 | E11.5 * Sox10 up vs E11.5 * Ctrl |
| 10541067 | Eif4a3        | NM_138669     | 0.00233085   | 1.11952 | E11.5 * Sox10 up vs E11.5 * Ctrl |
| 10526120 | Tpst1         | NM_001130476  | 0.00941277   | 1.11942 | E11.5 * Sox10 up vs E11.5 * Ctrl |
| 10580704 | Amfr          | NM_011787     | 0.000294648  | 1.11872 | E11.5 * Sox10 up vs E11.5 * Ctrl |
| 10494910 | Bcas2         | NM_026602     | 0.00305848   | 1.11848 | E11.5 * Sox10 up vs E11.5 * Ctrl |
| 10586368 | Clpx          | NM_011802     | 0.00945912   | 1.11831 | E11.5 * Sox10 up vs E11.5 * Ctrl |
| 10525352 | Ppp1cc        | NM_013636     | 0.000453794  | 1.11795 | E11.5 * Sox10 up vs E11.5 * Ctrl |
| 10548785 | Dynlt1        | NM_009342     | 0.000196411  | 1.11783 | E11.5 * Sox10 up vs E11.5 * Ctrl |
| 10527598 | Pomp          | NM_025624     | 0.00787106   | 1.11727 | E11.5 * Sox10 up vs E11.5 * Ctrl |
| 10600324 | Rpl3          | NM_013762     | 7.59315e-005 | 1.11686 | E11.5 * Sox10 up vs E11.5 * Ctrl |
| 10478409 | Pkig          | NM_001039390  | 0.0081503    | 1.11618 | E11.5 * Sox10 up vs E11.5 * Ctrl |
| 10347163 | Spag16        | NM_029160     | 0.00576496   | 1.11558 | E11.5 * Sox10 up vs E11.5 * Ctrl |
| 10527888 | Gatad1        | NM_026033     | 0.00678709   | 1.11532 | E11.5 * Sox10 up vs E11.5 * Ctrl |
| 10348775 | Ppp1r7        | NM_023200     | 0.000255784  | 1.11438 | E11.5 * Sox10 up vs E11.5 * Ctrl |
| 10402615 | Hsp90aa1      | NM_010480     | 0.00250677   | 1.11412 | E11.5 * Sox10 up vs E11.5 * Ctrl |
| 10556764 | Ppp1cc        | NM_013636     | 0.000881083  | 1.11397 | E11.5 * Sox10 up vs E11.5 * Ctrl |
| 10380689 | Cbx1          | NM_007622     | 0.00695699   | 1.11361 | E11.5 * Sox10 up vs E11.5 * Ctrl |
| 10482181 | Strbp         | NM_009261     | 0.00688527   | 1.11344 | E11.5 * Sox10 up vs E11.5 * Ctrl |
| 10356351 | Rpl6          | NM_011290     | 0.00155014   | 1.11175 | E11.5 * Sox10 up vs E11.5 * Ctrl |
| 10462333 | Cdc37l1       | NM_025950     | 0.0102271    | 1.11154 | E11.5 * Sox10 up vs E11.5 * Ctrl |
| 10518642 | Ube4b         | NM_022022     | 0.00854598   | 1.11051 | E11.5 * Sox10 up vs E11.5 * Ctrl |
| 10524718 | Rplp0         | NM_007475     | 0.00481321   | 1.10959 | E11.5 * Sox10 up vs E11.5 * Ctrl |
| 10520010 | Pmpcb         | NM_028431     | 0.00407441   | 1.10913 | E11.5 * Sox10 up vs E11.5 * Ctrl |

|          |               |              |              |          |                                    |
|----------|---------------|--------------|--------------|----------|------------------------------------|
| 10488929 | Elf6          | NM_010579    | 0.00961677   | 1.10899  | E11.5 * Sox10 up vs E11.5 * Ctrl   |
| 10393754 | Actg1         | NM_009609    | 0.00273048   | 1.10838  | E11.5 * Sox10 up vs E11.5 * Ctrl   |
| 10360794 | Fbxo28        | NM_175127    | 0.00267809   | 1.10771  | E11.5 * Sox10 up vs E11.5 * Ctrl   |
| 10598721 | Rpl3          | NM_013762    | 6.69461e-006 | 1.10693  | E11.5 * Sox10 up vs E11.5 * Ctrl   |
| 10568417 | 1110007A13Rik | BC038342     | 0.00475253   | 1.1064   | E11.5 * Sox10 up vs E11.5 * Ctrl   |
| 10372600 | Cct2          | NM_007636    | 0.00148181   | 1.10443  | E11.5 * Sox10 up vs E11.5 * Ctrl   |
| 10430669 | Rpl3          | NM_013762    | 1.26297e-005 | 1.10343  | E11.5 * Sox10 up vs E11.5 * Ctrl   |
| 10432162 | 2310037I24Rik | BC003301     | 0.00294027   | 1.10323  | E11.5 * Sox10 up vs E11.5 * Ctrl   |
| 10371981 | Ccdc38        | NM_175488    | 9.94768e-005 | 1.102    | E11.5 * Sox10 up vs E11.5 * Ctrl   |
| 10571182 | 4921537P18Rik | NM_027618    | 0.00733064   | 1.10113  | E11.5 * Sox10 up vs E11.5 * Ctrl   |
| 10546054 | Rpl3          | NM_013762    | 0.000172941  | 1.10088  | E11.5 * Sox10 up vs E11.5 * Ctrl   |
| 10543054 | Shfm1         | NM_009169    | 0.000857408  | 1.09982  | E11.5 * Sox10 up vs E11.5 * Ctrl   |
| 10525187 | Rpl6          | NM_011290    | 0.00226153   | 1.09979  | E11.5 * Sox10 up vs E11.5 * Ctrl   |
| 10351703 | Copa          | NM_009938    | 0.00853096   | 1.09966  | E11.5 * Sox10 up vs E11.5 * Ctrl   |
| 10549341 | 4933424B01Rik | NM_138757    | 0.00879578   | 1.09947  | E11.5 * Sox10 up vs E11.5 * Ctrl   |
| 10533483 | Atp2a2        | NM_001110140 | 0.000860428  | 1.09918  | E11.5 * Sox10 up vs E11.5 * Ctrl   |
| 10385686 | Hnrnpab       | NM_001048061 | 0.00206739   | 1.09833  | E11.5 * Sox10 up vs E11.5 * Ctrl   |
| 10506424 | Actg1         | NM_009609    | 0.00600872   | 1.09741  | E11.5 * Sox10 up vs E11.5 * Ctrl   |
| 10515154 | Rpl3          | NM_013762    | 0.000339723  | 1.09726  | E11.5 * Sox10 up vs E11.5 * Ctrl   |
| 10395831 | Brms1l        | NM_001037756 | 0.00495724   | 1.09658  | E11.5 * Sox10 up vs E11.5 * Ctrl   |
| 10369890 | Cisd1         | BC013522     | 0.00997445   | 1.09256  | E11.5 * Sox10 up vs E11.5 * Ctrl   |
| 10506893 | Nrd1          | NM_146150    | 0.000912116  | 1.09192  | E11.5 * Sox10 up vs E11.5 * Ctrl   |
| 10525657 | Denr          | NM_026603    | 0.00983542   | 1.08934  | E11.5 * Sox10 up vs E11.5 * Ctrl   |
| 10378739 | Ywhae         | NM_009536    | 0.000531448  | 1.08891  | E11.5 * Sox10 up vs E11.5 * Ctrl   |
| 10607388 | Rpl7a         | NM_013721    | 0.00926252   | 1.08685  | E11.5 * Sox10 up vs E11.5 * Ctrl   |
| 10471256 | Nup214        | NM_172268    | 0.00514662   | 1.08528  | E11.5 * Sox10 up vs E11.5 * Ctrl   |
| 10436694 | Rplp0         | NM_007475    | 0.0097698    | 1.08495  | E11.5 * Sox10 up vs E11.5 * Ctrl   |
| 10416915 | Rpl41         | NM_018860    | 0.00075882   | 1.08324  | E11.5 * Sox10 up vs E11.5 * Ctrl   |
| 10446785 | Spast         | NM_016962    | 0.00431712   | 1.08272  | E11.5 * Sox10 up vs E11.5 * Ctrl   |
| 10485514 | Caprin1       | NM_016739    | 0.00276572   | 1.08253  | E11.5 * Sox10 up vs E11.5 * Ctrl   |
| 10417749 | Ube2e1        | NM_009455    | 0.007394     | 1.08113  | E11.5 * Sox10 up vs E11.5 * Ctrl   |
| 10366301 | Rpl6          | NM_011290    | 0.00480377   | 1.07881  | E11.5 * Sox10 up vs E11.5 * Ctrl   |
| 10587546 | Rpl7a         | NM_013721    | 0.00883845   | 1.07859  | E11.5 * Sox10 up vs E11.5 * Ctrl   |
| 10400470 | Cox6c         | NM_053071    | 0.000355346  | 1.07644  | E11.5 * Sox10 up vs E11.5 * Ctrl   |
| 10568532 | Rpl7a         | NM_013721    | 0.00945959   | 1.07337  | E11.5 * Sox10 up vs E11.5 * Ctrl   |
| 10544015 | Ybx1          | NM_011732    | 0.00681132   | 1.06808  | E11.5 * Sox10 up vs E11.5 * Ctrl   |
| 10567020 | Rpl7a         | BC091731     | 0.00613864   | 1.06639  | E11.5 * Sox10 up vs E11.5 * Ctrl   |
| 10411363 | 5730427N09Rik | NM_021552    | 0.00283535   | 1.0653   | E11.5 * Sox10 up vs E11.5 * Ctrl   |
| 10427241 | Pcbp2         | NM_001103165 | 0.00195212   | 1.06373  | E11.5 * Sox10 up vs E11.5 * Ctrl   |
| 10418498 | Rpl7a         | NM_013721    | 0.00453212   | 1.06297  | E11.5 * Sox10 up vs E11.5 * Ctrl   |
| 10594752 | Rpl7a         | NM_013721    | 0.0021192    | 1.05857  | E11.5 * Sox10 up vs E11.5 * Ctrl   |
| 10432527 | Lass5         | NM_028015    | 0.00274635   | 1.05564  | E11.5 * Sox10 up vs E11.5 * Ctrl   |
| 10451301 | Rpl11         | NM_025919    | 0.000590133  | 1.05507  | E11.5 * Sox10 up vs E11.5 * Ctrl   |
| 10457731 | Rpl35         | NM_025592    | 0.00482915   | 1.05471  | E11.5 * Sox10 up vs E11.5 * Ctrl   |
| 10404262 | Rps8          | NM_009098    | 0.00428771   | 1.05268  | E11.5 * Sox10 up vs E11.5 * Ctrl   |
| 10428554 | Elf3h         | NM_080635    | 0.00672349   | 1.05186  | E11.5 * Sox10 up vs E11.5 * Ctrl   |
| 10414313 | Ubb           | NM_011664    | 0.00205979   | 1.05139  | E11.5 * Sox10 up vs E11.5 * Ctrl   |
| 10482267 | Rpl35         | NM_025592    | 0.00610755   | 1.04904  | E11.5 * Sox10 up vs E11.5 * Ctrl   |
| 10350816 | Rpl35         | NM_025592    | 0.00513875   | 1.04888  | E11.5 * Sox10 up vs E11.5 * Ctrl   |
| 10376864 | Ubb           | NM_011664    | 0.00435238   | 1.04814  | E11.5 * Sox10 up vs E11.5 * Ctrl   |
| 10454097 | Rpl11         | NM_025919    | 0.0026912    | 1.04633  | E11.5 * Sox10 up vs E11.5 * Ctrl   |
| 10594142 | Rpl11         | NM_025919    | 0.000833882  | 1.04359  | E11.5 * Sox10 up vs E11.5 * Ctrl   |
| 10517457 | Rpl11         | NM_025919    | 0.00311984   | 1.03971  | E11.5 * Sox10 up vs E11.5 * Ctrl   |
| 10502745 | Rpl11         | NM_025919    | 0.00804183   | 1.03837  | E11.5 * Sox10 up vs E11.5 * Ctrl   |
| 10550052 | Rps5          | NM_009095    | 0.00704566   | 1.03418  | E11.5 * Sox10 up vs E11.5 * Ctrl   |
| 10607324 | Rpl21         | NM_019647    | 0.0066424    | -1.03485 | E11.5 * Sox10 down vs E11.5 * Ctrl |
| 10424553 | EG668319      | NM_001111313 | 0.0086322    | -1.03518 | E11.5 * Sox10 down vs E11.5 * Ctrl |
| 10401695 | Rpl21         | BC106116     | 0.00988692   | -1.03764 | E11.5 * Sox10 down vs E11.5 * Ctrl |
| 10579839 | EG668319      | NM_001111313 | 0.00232648   | -1.04034 | E11.5 * Sox10 down vs E11.5 * Ctrl |
| 10455338 | Rpl21         | NM_019647    | 0.00386719   | -1.04065 | E11.5 * Sox10 down vs E11.5 * Ctrl |
| 10599433 | EG668319      | NM_001111313 | 0.00331227   | -1.04218 | E11.5 * Sox10 down vs E11.5 * Ctrl |
| 10392996 | EG668319      | NM_001111313 | 0.00226763   | -1.04358 | E11.5 * Sox10 down vs E11.5 * Ctrl |
| 10567823 | EG668319      | NM_001111313 | 0.00288746   | -1.04548 | E11.5 * Sox10 down vs E11.5 * Ctrl |
| 10562663 | EG668668      | NM_001081036 | 0.0094484    | -1.04739 | E11.5 * Sox10 down vs E11.5 * Ctrl |
| 10546292 | Rpl21         | BC094410     | 0.0104396    | -1.04984 | E11.5 * Sox10 down vs E11.5 * Ctrl |
| 10531144 | EG668319      | NM_001111313 | 0.0061238    | -1.0501  | E11.5 * Sox10 down vs E11.5 * Ctrl |

|                        |              |              |          |                                    |
|------------------------|--------------|--------------|----------|------------------------------------|
| 10595604 Syncrip       | NM_019796    | 0.00630366   | -1.05019 | E11.5 * Sox10 down vs E11.5 * Ctrl |
| 10423963 Eny2          | NM_175009    | 0.0084243    | -1.05397 | E11.5 * Sox10 down vs E11.5 * Ctrl |
| 10473006 EG668319      | NM_001111313 | 0.00490079   | -1.05657 | E11.5 * Sox10 down vs E11.5 * Ctrl |
| 10543317 Rpl21         | NM_019647    | 0.00122644   | -1.05955 | E11.5 * Sox10 down vs E11.5 * Ctrl |
| 10412665 Rpl21         | BC138299     | 0.00204199   | -1.06427 | E11.5 * Sox10 down vs E11.5 * Ctrl |
| 10598636 Ube2i         | NM_011665    | 0.00649022   | -1.07122 | E11.5 * Sox10 down vs E11.5 * Ctrl |
| 10359525 Bat2d         | NM_001081290 | 0.00254969   | -1.07462 | E11.5 * Sox10 down vs E11.5 * Ctrl |
| 10389882 3300001P08Rik | NM_026313    | 0.00871398   | -1.07758 | E11.5 * Sox10 down vs E11.5 * Ctrl |
| 10380210 Sfrs1         | NM_173374    | 0.00111727   | -1.08064 | E11.5 * Sox10 down vs E11.5 * Ctrl |
| 10507011 Dmrt2         | NM_172296    | 0.00693129   | -1.08449 | E11.5 * Sox10 down vs E11.5 * Ctrl |
| 10515337 Nasp          | NM_016777    | 0.00910253   | -1.08616 | E11.5 * Sox10 down vs E11.5 * Ctrl |
| 10404020 V1rh2         | NM_145844    | 0.00309582   | -1.08729 | E11.5 * Sox10 down vs E11.5 * Ctrl |
| 10547436 Wnk1          | NM_198703    | 0.00965346   | -1.08786 | E11.5 * Sox10 down vs E11.5 * Ctrl |
| 10577352 Defb12        | NM_152802    | 0.0103083    | -1.09248 | E11.5 * Sox10 down vs E11.5 * Ctrl |
| 10414817 Tcra          | U07662       | 0.00777916   | -1.09407 | E11.5 * Sox10 down vs E11.5 * Ctrl |
| 10461071 2700081O15Rik | NM_175381    | 0.00612561   | -1.0942  | E11.5 * Sox10 down vs E11.5 * Ctrl |
| 10428912               | ---          | 0.00722737   | -1.09603 | E11.5 * Sox10 down vs E11.5 * Ctrl |
| 10557206 Rbbp6         | NM_175023    | 0.0028213    | -1.09689 | E11.5 * Sox10 down vs E11.5 * Ctrl |
| 10367477 Olfr774       | NM_207620    | 0.00425658   | -1.10057 | E11.5 * Sox10 down vs E11.5 * Ctrl |
| 10405163 Spin1         | NM_146043    | 0.00469452   | -1.10434 | E11.5 * Sox10 down vs E11.5 * Ctrl |
| 10511629 ENSMUSG0000C  | NR_003968    | 0.00915574   | -1.10455 | E11.5 * Sox10 down vs E11.5 * Ctrl |
| 10598020               | ---          | 0.000975134  | -1.10459 | E11.5 * Sox10 down vs E11.5 * Ctrl |
| 10357965 Lgr6          | NM_001033409 | 0.00458267   | -1.10492 | E11.5 * Sox10 down vs E11.5 * Ctrl |
| 10591773 Hmgn2         | NM_016957    | 0.000959527  | -1.10562 | E11.5 * Sox10 down vs E11.5 * Ctrl |
| 10349100 EG626075      | XR_032823    | 0.0100074    | -1.10596 | E11.5 * Sox10 down vs E11.5 * Ctrl |
| 10577666 Adam18        | NM_010084    | 0.00945055   | -1.1065  | E11.5 * Sox10 down vs E11.5 * Ctrl |
| 10541581 Clec4b1       | NM_027218    | 0.00481023   | -1.10756 | E11.5 * Sox10 down vs E11.5 * Ctrl |
| 10522472 Fip11         | NM_001159573 | 0.00659021   | -1.10785 | E11.5 * Sox10 down vs E11.5 * Ctrl |
| 10500813 Hipk1         | NM_010432    | 0.00553817   | -1.10921 | E11.5 * Sox10 down vs E11.5 * Ctrl |
| 10517141 Hmgn2         | NM_016957    | 0.000601771  | -1.1094  | E11.5 * Sox10 down vs E11.5 * Ctrl |
| 10405400 Nsd1          | NM_008739    | 0.00794975   | -1.10965 | E11.5 * Sox10 down vs E11.5 * Ctrl |
| 10530666 Lnx1          | NM_010727    | 0.00551431   | -1.11142 | E11.5 * Sox10 down vs E11.5 * Ctrl |
| 10448004 Phf10         | NM_024250    | 0.00412463   | -1.1116  | E11.5 * Sox10 down vs E11.5 * Ctrl |
| 10579659 Hmgn2         | NM_016957    | 0.000830567  | -1.11203 | E11.5 * Sox10 down vs E11.5 * Ctrl |
| 10506500 Usp24         | ENSMUST00000 | 0.00380122   | -1.11299 | E11.5 * Sox10 down vs E11.5 * Ctrl |
| 10395532               | ---          | 0.00877076   | -1.11302 | E11.5 * Sox10 down vs E11.5 * Ctrl |
| 10436873 Son           | NM_178880    | 0.00955216   | -1.11334 | E11.5 * Sox10 down vs E11.5 * Ctrl |
| 10417601 Ptma          | NM_008972    | 0.000426349  | -1.11417 | E11.5 * Sox10 down vs E11.5 * Ctrl |
| 10566097 Nup98         | NM_022979    | 0.00888622   | -1.11485 | E11.5 * Sox10 down vs E11.5 * Ctrl |
| 10522024 Tbc1d1        | NM_019636    | 0.00749688   | -1.11518 | E11.5 * Sox10 down vs E11.5 * Ctrl |
| 10508490 Sfrs5         | NM_001079695 | 0.00408783   | -1.11597 | E11.5 * Sox10 down vs E11.5 * Ctrl |
| 10477966 Manbal        | NM_026968    | 0.00798546   | -1.11603 | E11.5 * Sox10 down vs E11.5 * Ctrl |
| 10555729 Olfr555       | NM_147103    | 0.00717044   | -1.11654 | E11.5 * Sox10 down vs E11.5 * Ctrl |
| 10492045 Hnrnpa3       | NM_053263    | 0.0089936    | -1.11662 | E11.5 * Sox10 down vs E11.5 * Ctrl |
| 10458138 Brd8          | NM_030147    | 0.00678501   | -1.11706 | E11.5 * Sox10 down vs E11.5 * Ctrl |
| 10499716 Ubap2l        | NM_028475    | 0.00230448   | -1.11719 | E11.5 * Sox10 down vs E11.5 * Ctrl |
| 10396237 2700049A03Rik | BC150744     | 0.000655346  | -1.11757 | E11.5 * Sox10 down vs E11.5 * Ctrl |
| 10418616 Dnahc1        | BC023155     | 0.00921179   | -1.11757 | E11.5 * Sox10 down vs E11.5 * Ctrl |
| 10414581 AY358078      | AY358078     | 0.00875683   | -1.1177  | E11.5 * Sox10 down vs E11.5 * Ctrl |
| 10435714 Tmem39a       | NM_026407    | 0.00590606   | -1.11806 | E11.5 * Sox10 down vs E11.5 * Ctrl |
| 10348078 Ptma          | NM_008972    | 8.77112e-005 | -1.11841 | E11.5 * Sox10 down vs E11.5 * Ctrl |
| 10473008 Hnrnpa3       | NM_146130    | 0.00678166   | -1.11925 | E11.5 * Sox10 down vs E11.5 * Ctrl |
| 10447141 Eml4          | NM_001114361 | 0.00815271   | -1.11997 | E11.5 * Sox10 down vs E11.5 * Ctrl |
| 10360848 Mosc2         | NM_133684    | 0.0091404    | -1.1212  | E11.5 * Sox10 down vs E11.5 * Ctrl |
| 10350535 Tpr           | NM_133780    | 0.00824829   | -1.12146 | E11.5 * Sox10 down vs E11.5 * Ctrl |
| 10602501 Huwe1         | NM_021523    | 0.000368951  | -1.12195 | E11.5 * Sox10 down vs E11.5 * Ctrl |
| 10598067               | ---          | 0.00167938   | -1.12209 | E11.5 * Sox10 down vs E11.5 * Ctrl |
| 10440180 Olfr205       | NM_001011736 | 0.00471461   | -1.12224 | E11.5 * Sox10 down vs E11.5 * Ctrl |
| 10560744 V1rd15        | NM_203489    | 0.0094336    | -1.12265 | E11.5 * Sox10 down vs E11.5 * Ctrl |
| 10489018 Rbm39         | NM_133242    | 0.00214398   | -1.12298 | E11.5 * Sox10 down vs E11.5 * Ctrl |
| 10438942 Tmem44        | NM_172614    | 0.00684943   | -1.12349 | E11.5 * Sox10 down vs E11.5 * Ctrl |
| 10363007 Ascc3         | NM_001146089 | 0.00151011   | -1.12668 | E11.5 * Sox10 down vs E11.5 * Ctrl |
| 10598029 ND1           | ENSMUST00000 | 0.00135595   | -1.12673 | E11.5 * Sox10 down vs E11.5 * Ctrl |
| 10597493 Stt3b         | NM_024222    | 0.00187229   | -1.12683 | E11.5 * Sox10 down vs E11.5 * Ctrl |
| 10579663 Eps15l1       | NM_007944    | 0.00312656   | -1.12722 | E11.5 * Sox10 down vs E11.5 * Ctrl |
| 10534964 Rps25         | NM_024266    | 0.00869309   | -1.12732 | E11.5 * Sox10 down vs E11.5 * Ctrl |

|                          |               |              |          |                                    |
|--------------------------|---------------|--------------|----------|------------------------------------|
| 10397257 Vsx2            | NM_007701     | 0.00601065   | -1.12776 | E11.5 * Sox10 down vs E11.5 * Ctrl |
| 10580516 EG625801        | XR_031896     | 0.00603799   | -1.12797 | E11.5 * Sox10 down vs E11.5 * Ctrl |
| 10516103 Macf1           | NM_009600     | 0.00298706   | -1.12869 | E11.5 * Sox10 down vs E11.5 * Ctrl |
| 10598025                 | ---           | 0.000453851  | -1.1288  | E11.5 * Sox10 down vs E11.5 * Ctrl |
| 10503570 Sfrs18          | NM_025669     | 0.00712556   | -1.12903 | E11.5 * Sox10 down vs E11.5 * Ctrl |
| 10492558 Smc4            | NM_133786     | 0.00757312   | -1.12973 | E11.5 * Sox10 down vs E11.5 * Ctrl |
| 10437454 Anks3           | NM_028301     | 0.00135654   | -1.12983 | E11.5 * Sox10 down vs E11.5 * Ctrl |
| 10367501                 | ---           | 0.00396151   | -1.13008 | E11.5 * Sox10 down vs E11.5 * Ctrl |
| 10390707 Top2a           | NM_011623     | 0.00475181   | -1.13064 | E11.5 * Sox10 down vs E11.5 * Ctrl |
| 10576965                 | ---           | 0.00436013   | -1.13101 | E11.5 * Sox10 down vs E11.5 * Ctrl |
| 10436804 Mrap            | NM_029844     | 0.00726933   | -1.13192 | E11.5 * Sox10 down vs E11.5 * Ctrl |
| 10576386 Rhou            | NM_133955     | 0.00932791   | -1.13194 | E11.5 * Sox10 down vs E11.5 * Ctrl |
| 10583753 EG624219        | NM_001080940  | 0.00678516   | -1.13241 | E11.5 * Sox10 down vs E11.5 * Ctrl |
| 10502982 Tnni3k          | NM_177066     | 0.0076927    | -1.13316 | E11.5 * Sox10 down vs E11.5 * Ctrl |
| 10443438 Pnpla1          | NM_001034885  | 0.0025135    | -1.13318 | E11.5 * Sox10 down vs E11.5 * Ctrl |
| 10493842 Pglyrp3         | NM_207247     | 0.00425995   | -1.13325 | E11.5 * Sox10 down vs E11.5 * Ctrl |
| 10366667 Gns             | NM_029364     | 0.00310496   | -1.13342 | E11.5 * Sox10 down vs E11.5 * Ctrl |
| 10455342                 | ---           | 0.00359493   | -1.13361 | E11.5 * Sox10 down vs E11.5 * Ctrl |
| 10529226 Rbks            | NM_153196     | 0.00377147   | -1.13414 | E11.5 * Sox10 down vs E11.5 * Ctrl |
| 10360589 Ahctf1          | NM_026375     | 0.000872148  | -1.13493 | E11.5 * Sox10 down vs E11.5 * Ctrl |
| 10405999 8030423J24Rik   | ENSMUST000001 | 0.00605203   | -1.13498 | E11.5 * Sox10 down vs E11.5 * Ctrl |
| 10551293 Cyp2f2          | NM_007817     | 0.00825276   | -1.13584 | E11.5 * Sox10 down vs E11.5 * Ctrl |
| 10417004 Dzip1           | NM_025943     | 0.00020047   | -1.13627 | E11.5 * Sox10 down vs E11.5 * Ctrl |
| 10502898 Ube2l3          | NM_009456     | 0.00354313   | -1.13651 | E11.5 * Sox10 down vs E11.5 * Ctrl |
| 10458046 D0H4S114        | NM_053078     | 0.00325264   | -1.13686 | E11.5 * Sox10 down vs E11.5 * Ctrl |
| 10437332 Crebbp          | NM_001025432  | 0.00067888   | -1.13808 | E11.5 * Sox10 down vs E11.5 * Ctrl |
| 10344939 Terf1           | NM_009352     | 0.00701517   | -1.13871 | E11.5 * Sox10 down vs E11.5 * Ctrl |
| 10396926 Sfrs5           | NM_001079695  | 0.00273399   | -1.13878 | E11.5 * Sox10 down vs E11.5 * Ctrl |
| 10537957 Krba1           | NM_133922     | 0.0088325    | -1.1388  | E11.5 * Sox10 down vs E11.5 * Ctrl |
| 10489936 Adnp            | NM_009628     | 0.00355042   | -1.13888 | E11.5 * Sox10 down vs E11.5 * Ctrl |
| 10371959 Elk3            | NM_013508     | 0.00882494   | -1.13917 | E11.5 * Sox10 down vs E11.5 * Ctrl |
| 10387568 Tnfsf12-tnfsf13 | NM_001034097  | 0.00579709   | -1.13934 | E11.5 * Sox10 down vs E11.5 * Ctrl |
| 10587075                 | ---           | 0.00532635   | -1.14002 | E11.5 * Sox10 down vs E11.5 * Ctrl |
| 10599781 Htatsf1         | NM_028242     | 0.00851771   | -1.14016 | E11.5 * Sox10 down vs E11.5 * Ctrl |
| 10479249 Cdh26           | NM_198656     | 0.00332587   | -1.14026 | E11.5 * Sox10 down vs E11.5 * Ctrl |
| 10352556 100042375       | XR_032441     | 0.00857989   | -1.14056 | E11.5 * Sox10 down vs E11.5 * Ctrl |
| 10452508 Twsg1           | NM_023053     | 0.00299961   | -1.14066 | E11.5 * Sox10 down vs E11.5 * Ctrl |
| 10541290 Pex26           | NM_028730     | 0.00855012   | -1.14095 | E11.5 * Sox10 down vs E11.5 * Ctrl |
| 10370303 Adarb1          | NR_004429     | 0.00772807   | -1.14238 | E11.5 * Sox10 down vs E11.5 * Ctrl |
| 10355069 Ino80d          | NM_001114609  | 0.000219845  | -1.14254 | E11.5 * Sox10 down vs E11.5 * Ctrl |
| 10594825 Aqp9            | NM_022026     | 0.00606218   | -1.14273 | E11.5 * Sox10 down vs E11.5 * Ctrl |
| 10600547 Tbl1x           | NM_020601     | 0.00250886   | -1.14278 | E11.5 * Sox10 down vs E11.5 * Ctrl |
| 10408915 Dtnbp1          | NM_025772     | 0.0032994    | -1.14305 | E11.5 * Sox10 down vs E11.5 * Ctrl |
| 10580905 Cnot1           | NM_153164     | 9.55397e-005 | -1.1432  | E11.5 * Sox10 down vs E11.5 * Ctrl |
| 10578941 Trim60          | NM_153097     | 0.00899966   | -1.14352 | E11.5 * Sox10 down vs E11.5 * Ctrl |
| 10409152 1110007C09Rik   | NM_026738     | 0.00762813   | -1.14389 | E11.5 * Sox10 down vs E11.5 * Ctrl |
| 10394477 Laptm4a         | NM_008640     | 0.000558721  | -1.14389 | E11.5 * Sox10 down vs E11.5 * Ctrl |
| 10557315 4930571K23Rik   | NM_001145759  | 0.00903855   | -1.14396 | E11.5 * Sox10 down vs E11.5 * Ctrl |
| 10570697                 | ---           | 0.0087154    | -1.14424 | E11.5 * Sox10 down vs E11.5 * Ctrl |
| 10598069 CYTB            | ENSMUST000001 | 6.47874e-006 | -1.14509 | E11.5 * Sox10 down vs E11.5 * Ctrl |
| 10377319 Myh10           | NM_175260     | 0.00832415   | -1.14554 | E11.5 * Sox10 down vs E11.5 * Ctrl |
| 10438530 Clcn2           | NM_009900     | 0.000478362  | -1.14568 | E11.5 * Sox10 down vs E11.5 * Ctrl |
| 10607425 EG434881        | NM_001037167  | 0.00755424   | -1.14589 | E11.5 * Sox10 down vs E11.5 * Ctrl |
| 10382795 OTTMUSG00000    | XR_034731     | 0.00538127   | -1.14659 | E11.5 * Sox10 down vs E11.5 * Ctrl |
| 10375732 Cby3            | ENSMUST000001 | 0.00265209   | -1.14701 | E11.5 * Sox10 down vs E11.5 * Ctrl |
| 10374500 Vps54           | NM_139061     | 0.000276873  | -1.14728 | E11.5 * Sox10 down vs E11.5 * Ctrl |
| 10408175 Btn1a1          | NM_013483     | 0.0036429    | -1.14736 | E11.5 * Sox10 down vs E11.5 * Ctrl |
| 10495873 Ptma            | NM_008972     | 0.00292514   | -1.14753 | E11.5 * Sox10 down vs E11.5 * Ctrl |
| 10398392                 | ---           | 0.00601878   | -1.14863 | E11.5 * Sox10 down vs E11.5 * Ctrl |
| 10506843 Cc2d1b          | NM_177045     | 0.00866122   | -1.14864 | E11.5 * Sox10 down vs E11.5 * Ctrl |
| 10353727                 | ---           | 0.00910159   | -1.14869 | E11.5 * Sox10 down vs E11.5 * Ctrl |
| 10450325 Cfb             | NM_008198     | 0.006333     | -1.14878 | E11.5 * Sox10 down vs E11.5 * Ctrl |
| 10601988 Trap1a          | NM_011635     | 0.00435141   | -1.14884 | E11.5 * Sox10 down vs E11.5 * Ctrl |
| 10544610 Igf2bp3         | NM_023670     | 0.00945097   | -1.14885 | E11.5 * Sox10 down vs E11.5 * Ctrl |
| 10404593                 | ---           | 0.00542939   | -1.14942 | E11.5 * Sox10 down vs E11.5 * Ctrl |
| 10357064 Vps4b           | NM_009190     | 0.00671879   | -1.15019 | E11.5 * Sox10 down vs E11.5 * Ctrl |

|                        |              |              |          |                                    |
|------------------------|--------------|--------------|----------|------------------------------------|
| 10453256 Kcng3         | NM_153512    | 0.00530463   | -1.15046 | E11.5 * Sox10 down vs E11.5 * Ctrl |
| 10366238 Ppp1r12a      | NM_027892    | 0.000215331  | -1.15096 | E11.5 * Sox10 down vs E11.5 * Ctrl |
| 10557587 Zfp771        | NM_177362    | 0.00305138   | -1.15189 | E11.5 * Sox10 down vs E11.5 * Ctrl |
| 10515201 Cyp4b1        | NM_007823    | 0.00263717   | -1.15239 | E11.5 * Sox10 down vs E11.5 * Ctrl |
| 10494583 Sec22b        | NM_011342    | 0.000786707  | -1.15275 | E11.5 * Sox10 down vs E11.5 * Ctrl |
| 10526195 Gtf2ird2      | NM_053266    | 0.000898109  | -1.15283 | E11.5 * Sox10 down vs E11.5 * Ctrl |
| 10577973 Adrb3         | NM_013462    | 0.00790207   | -1.15344 | E11.5 * Sox10 down vs E11.5 * Ctrl |
| 10492803               | ---          | 0.00486075   | -1.15361 | E11.5 * Sox10 down vs E11.5 * Ctrl |
| 10368380 L3mbtl3       | NM_172787    | 0.00284031   | -1.15374 | E11.5 * Sox10 down vs E11.5 * Ctrl |
| 10537397 Luc7l2        | NM_138680    | 0.000224096  | -1.15384 | E11.5 * Sox10 down vs E11.5 * Ctrl |
| 10532040 Zfp644        | NM_026856    | 0.00353445   | -1.15438 | E11.5 * Sox10 down vs E11.5 * Ctrl |
| 10425177 Triobp        | NM_001039156 | 0.00332415   | -1.15453 | E11.5 * Sox10 down vs E11.5 * Ctrl |
| 10434799               | ---          | 0.00825996   | -1.15453 | E11.5 * Sox10 down vs E11.5 * Ctrl |
| 10387029 Dnahc9        | NM_001099633 | 0.00240495   | -1.15529 | E11.5 * Sox10 down vs E11.5 * Ctrl |
| 10570614 Defb6         | NM_054074    | 0.00887958   | -1.15592 | E11.5 * Sox10 down vs E11.5 * Ctrl |
| 10558285 Zranb1        | NM_207302    | 0.00812639   | -1.15609 | E11.5 * Sox10 down vs E11.5 * Ctrl |
| 10552632 Shank1        | ENSMUST00000 | 0.00332336   | -1.15636 | E11.5 * Sox10 down vs E11.5 * Ctrl |
| 10388086 Nlrp1c        | NM_001039234 | 0.00971225   | -1.15658 | E11.5 * Sox10 down vs E11.5 * Ctrl |
| 10569057 Rnh1          | NM_145135    | 0.001941     | -1.15675 | E11.5 * Sox10 down vs E11.5 * Ctrl |
| 10431014 Vkorc1l1      | NM_027121    | 0.00893127   | -1.15687 | E11.5 * Sox10 down vs E11.5 * Ctrl |
| 10582390 Aprt          | NM_009698    | 0.00573329   | -1.15707 | E11.5 * Sox10 down vs E11.5 * Ctrl |
| 10607712 Grpr          | NM_008177    | 0.00282655   | -1.15725 | E11.5 * Sox10 down vs E11.5 * Ctrl |
| 10446136 Tmem146       | BC116633     | 0.00416164   | -1.15748 | E11.5 * Sox10 down vs E11.5 * Ctrl |
| 10527832 Pds5b         | NM_175310    | 0.000392687  | -1.15757 | E11.5 * Sox10 down vs E11.5 * Ctrl |
| 10416421 Lrch1         | NM_001033439 | 0.00699788   | -1.15827 | E11.5 * Sox10 down vs E11.5 * Ctrl |
| 10422912 2410089E03Rik | BC058107     | 3.16979e-005 | -1.15939 | E11.5 * Sox10 down vs E11.5 * Ctrl |
| 10529052 Slc5a6        | NM_177870    | 0.00837902   | -1.16067 | E11.5 * Sox10 down vs E11.5 * Ctrl |
| 10461867 Vps13a        | AK015803     | 0.00815302   | -1.16079 | E11.5 * Sox10 down vs E11.5 * Ctrl |
| 10528183 Speer4e       | NM_001122661 | 0.00037394   | -1.1611  | E11.5 * Sox10 down vs E11.5 * Ctrl |
| 10471677 Dab2ip        | NM_001114124 | 0.00308665   | -1.16116 | E11.5 * Sox10 down vs E11.5 * Ctrl |
| 10530151 Tlr6          | NM_011604    | 0.00696747   | -1.16119 | E11.5 * Sox10 down vs E11.5 * Ctrl |
| 10376895               | ---          | 0.00304072   | -1.16123 | E11.5 * Sox10 down vs E11.5 * Ctrl |
| 10419296 Wdhd1         | NM_172598    | 0.00354533   | -1.16134 | E11.5 * Sox10 down vs E11.5 * Ctrl |
| 10406403               | ---          | 0.00350093   | -1.16136 | E11.5 * Sox10 down vs E11.5 * Ctrl |
| 10601691 Arl13a        | BC100522     | 0.00415542   | -1.16139 | E11.5 * Sox10 down vs E11.5 * Ctrl |
| 10542632 lapp          | NM_010491    | 0.0041928    | -1.16151 | E11.5 * Sox10 down vs E11.5 * Ctrl |
| 10438178 4930451C15Rik | NM_029053    | 0.00993163   | -1.16159 | E11.5 * Sox10 down vs E11.5 * Ctrl |
| 10401296 Slc8a3        | NM_080440    | 0.00841176   | -1.16165 | E11.5 * Sox10 down vs E11.5 * Ctrl |
| 10519942 Magi2         | ENSMUST00000 | 0.00509791   | -1.16168 | E11.5 * Sox10 down vs E11.5 * Ctrl |
| 10420775               | ---          | 0.00798259   | -1.16194 | E11.5 * Sox10 down vs E11.5 * Ctrl |
| 10457637               | ---          | 0.0077377    | -1.16198 | E11.5 * Sox10 down vs E11.5 * Ctrl |
| 10526106 Vkorc1l1      | NM_027121    | 0.000542559  | -1.16223 | E11.5 * Sox10 down vs E11.5 * Ctrl |
| 10399198 Ncoa4         | NM_019744    | 0.00475077   | -1.16228 | E11.5 * Sox10 down vs E11.5 * Ctrl |
| 10571371 Tusc3         | NM_030254    | 0.0012462    | -1.1624  | E11.5 * Sox10 down vs E11.5 * Ctrl |
| 10426875 Atf1          | NM_007497    | 0.00437392   | -1.1627  | E11.5 * Sox10 down vs E11.5 * Ctrl |
| 10364984 Zbtb7a        | NM_010731    | 0.0067532    | -1.16281 | E11.5 * Sox10 down vs E11.5 * Ctrl |
| 10479938 Echdc3        | NM_024208    | 0.00468644   | -1.16284 | E11.5 * Sox10 down vs E11.5 * Ctrl |
| 10548779 Pbp2          | NM_029595    | 0.0101655    | -1.16288 | E11.5 * Sox10 down vs E11.5 * Ctrl |
| 10507817 Bmp8b         | NM_007559    | 0.00882509   | -1.16292 | E11.5 * Sox10 down vs E11.5 * Ctrl |
| 10372082 Nudt4         | NM_027722    | 0.00873231   | -1.16326 | E11.5 * Sox10 down vs E11.5 * Ctrl |
| 10527575 Pan3          | NM_028291    | 0.00250779   | -1.16373 | E11.5 * Sox10 down vs E11.5 * Ctrl |
| 10385642 9630041N07Rik | NM_173387    | 0.00376931   | -1.16405 | E11.5 * Sox10 down vs E11.5 * Ctrl |
| 10440717 Krtap6-1      | ENSMUST00000 | 0.00482517   | -1.16406 | E11.5 * Sox10 down vs E11.5 * Ctrl |
| 10563116 Flt3l         | NM_013520    | 0.00184352   | -1.16462 | E11.5 * Sox10 down vs E11.5 * Ctrl |
| 10391914 Sh3d20        | NM_183288    | 0.00328687   | -1.16473 | E11.5 * Sox10 down vs E11.5 * Ctrl |
| 10453272 Zfp36l2       | NM_001001806 | 0.00793967   | -1.16531 | E11.5 * Sox10 down vs E11.5 * Ctrl |
| 10567964 Cln3          | NM_001146311 | 0.00640294   | -1.16532 | E11.5 * Sox10 down vs E11.5 * Ctrl |
| 10527694 B3galtl       | NM_001081204 | 0.00607231   | -1.1657  | E11.5 * Sox10 down vs E11.5 * Ctrl |
| 10365134               | ---          | 0.00219922   | -1.16582 | E11.5 * Sox10 down vs E11.5 * Ctrl |
| 10381172 Stat5a        | NM_011488    | 0.00228462   | -1.16583 | E11.5 * Sox10 down vs E11.5 * Ctrl |
| 10413839 Ncoa4         | NM_001033988 | 0.00182105   | -1.16602 | E11.5 * Sox10 down vs E11.5 * Ctrl |
| 10477058 Sct2          | ENSMUST00000 | 0.00130018   | -1.16607 | E11.5 * Sox10 down vs E11.5 * Ctrl |
| 10383423 Anapc11       | NM_025389    | 0.00744282   | -1.16648 | E11.5 * Sox10 down vs E11.5 * Ctrl |
| 10601404 EG331493      | NM_001033541 | 0.00800815   | -1.1668  | E11.5 * Sox10 down vs E11.5 * Ctrl |
| 10374020 Rhbdd3        | NM_177370    | 0.000452705  | -1.16733 | E11.5 * Sox10 down vs E11.5 * Ctrl |
| 10373651 Olfr814       | ENSMUST00000 | 0.00577526   | -1.16788 | E11.5 * Sox10 down vs E11.5 * Ctrl |

|                        |              |              |          |                                    |
|------------------------|--------------|--------------|----------|------------------------------------|
| 10348150 Chrnd         | NM_021600    | 0.00534218   | -1.16835 | E11.5 * Sox10 down vs E11.5 * Ctrl |
| 10603026 Ctps2         | NM_018737    | 0.0026789    | -1.16844 | E11.5 * Sox10 down vs E11.5 * Ctrl |
| 10577948 Brf2          | NM_025686    | 0.0093296    | -1.16871 | E11.5 * Sox10 down vs E11.5 * Ctrl |
| 10508797 ENSMUSG00000  | ENSMUST00000 | 0.00145747   | -1.1691  | E11.5 * Sox10 down vs E11.5 * Ctrl |
| 10503303 1110037F02Rik | NM_001081183 | 0.00382497   | -1.16926 | E11.5 * Sox10 down vs E11.5 * Ctrl |
| 10344772 6030422M02Rik | NM_177722    | 0.00922645   | -1.16941 | E11.5 * Sox10 down vs E11.5 * Ctrl |
| 10577421 Defcr-rs1     | NM_007844    | 0.00475171   | -1.16946 | E11.5 * Sox10 down vs E11.5 * Ctrl |
| 10513320 Ptgr1         | NM_025968    | 0.00333626   | -1.16959 | E11.5 * Sox10 down vs E11.5 * Ctrl |
| 10401114 Rab15         | NM_134050    | 0.00263831   | -1.16964 | E11.5 * Sox10 down vs E11.5 * Ctrl |
| 10409905 Ctsr          | NM_020284    | 0.00904472   | -1.16976 | E11.5 * Sox10 down vs E11.5 * Ctrl |
| 10577757 Adam9         | NM_007404    | 0.00653418   | -1.16996 | E11.5 * Sox10 down vs E11.5 * Ctrl |
| 10548884 Erp27         | NM_026983    | 0.00831699   | -1.17012 | E11.5 * Sox10 down vs E11.5 * Ctrl |
| 10366038 Galnt4        | NM_015737    | 0.00600051   | -1.17021 | E11.5 * Sox10 down vs E11.5 * Ctrl |
| 10490304 Sycp2         | NM_177191    | 0.00292945   | -1.1704  | E11.5 * Sox10 down vs E11.5 * Ctrl |
| 10346651 Bmpr2         | NM_007561    | 0.000243945  | -1.17068 | E11.5 * Sox10 down vs E11.5 * Ctrl |
| 10598369 Prickle3      | NM_175097    | 0.00157901   | -1.17095 | E11.5 * Sox10 down vs E11.5 * Ctrl |
| 10554045 Adamts17      | NM_001033877 | 0.000879962  | -1.17112 | E11.5 * Sox10 down vs E11.5 * Ctrl |
| 10345626 Elf5b         | NM_198303    | 0.00885831   | -1.17142 | E11.5 * Sox10 down vs E11.5 * Ctrl |
| 10453721 Wac           | NM_153085    | 0.0039258    | -1.17158 | E11.5 * Sox10 down vs E11.5 * Ctrl |
| 10461526 Vwce          | NM_027913    | 0.00931571   | -1.17158 | E11.5 * Sox10 down vs E11.5 * Ctrl |
| 10605499 3426406K10Rik | AK132212     | 0.000903951  | -1.17181 | E11.5 * Sox10 down vs E11.5 * Ctrl |
| 10434815 Trp63         | NM_001127259 | 0.0084851    | -1.17237 | E11.5 * Sox10 down vs E11.5 * Ctrl |
| 10353878 Ankrd23       | NM_153502    | 0.00172513   | -1.17256 | E11.5 * Sox10 down vs E11.5 * Ctrl |
| 10503711 Casp8ap2      | NM_011997    | 0.0043758    | -1.17266 | E11.5 * Sox10 down vs E11.5 * Ctrl |
| 10539617 Alms1         | NM_145223    | 0.00871651   | -1.17268 | E11.5 * Sox10 down vs E11.5 * Ctrl |
| 10361338 Ipcef1        | NM_001033391 | 0.00834526   | -1.17272 | E11.5 * Sox10 down vs E11.5 * Ctrl |
| 10516823 Epb4.1        | NM_183428    | 2.37425e-005 | -1.17298 | E11.5 * Sox10 down vs E11.5 * Ctrl |
| 10430647               | ---          | 0.00481627   | -1.17299 | E11.5 * Sox10 down vs E11.5 * Ctrl |
| 10525780 Tctn2         | NM_026486    | 0.00669412   | -1.17322 | E11.5 * Sox10 down vs E11.5 * Ctrl |
| 10585318 Rdx           | NM_001104617 | 0.00505368   | -1.17398 | E11.5 * Sox10 down vs E11.5 * Ctrl |
| 10520648               | ---          | 0.00275592   | -1.17469 | E11.5 * Sox10 down vs E11.5 * Ctrl |
| 10539873 Gata2         | NM_008090    | 0.0103857    | -1.17579 | E11.5 * Sox10 down vs E11.5 * Ctrl |
| 10535329 Papolb        | NM_019943    | 0.00727953   | -1.17587 | E11.5 * Sox10 down vs E11.5 * Ctrl |
| 10385747 Phf15         | NM_199299    | 0.00825986   | -1.17643 | E11.5 * Sox10 down vs E11.5 * Ctrl |
| 10551365 Prx           | NM_019412    | 0.00355925   | -1.1766  | E11.5 * Sox10 down vs E11.5 * Ctrl |
| 10455954 EG240327      | NM_001033767 | 0.00357476   | -1.17677 | E11.5 * Sox10 down vs E11.5 * Ctrl |
| 10492442               | ---          | 0.000641801  | -1.177   | E11.5 * Sox10 down vs E11.5 * Ctrl |
| 10462480 Cstf2t        | NM_031249    | 0.0043729    | -1.17731 | E11.5 * Sox10 down vs E11.5 * Ctrl |
| 10484575 Olfr1048      | NM_147014    | 0.00224784   | -1.17751 | E11.5 * Sox10 down vs E11.5 * Ctrl |
| 10561247 Shkbp1        | NM_138676    | 0.00980333   | -1.17761 | E11.5 * Sox10 down vs E11.5 * Ctrl |
| 10398426               | ---          | 0.00993005   | -1.17769 | E11.5 * Sox10 down vs E11.5 * Ctrl |
| 10383953 Emid1         | NM_080595    | 0.00429027   | -1.17776 | E11.5 * Sox10 down vs E11.5 * Ctrl |
| 10552488 Klk10         | NM_133712    | 0.00117474   | -1.17803 | E11.5 * Sox10 down vs E11.5 * Ctrl |
| 10395596 Foxg1         | NM_008241    | 0.000404243  | -1.17813 | E11.5 * Sox10 down vs E11.5 * Ctrl |
| 10366725 Fam19a2       | NM_182807    | 0.00493237   | -1.17836 | E11.5 * Sox10 down vs E11.5 * Ctrl |
| 10519805 Speer4d       | NM_025759    | 0.00977875   | -1.17862 | E11.5 * Sox10 down vs E11.5 * Ctrl |
| 10603245               | ---          | 0.00469558   | -1.17866 | E11.5 * Sox10 down vs E11.5 * Ctrl |
| 10414493 Olfr748       | NM_001011837 | 0.00612876   | -1.17869 | E11.5 * Sox10 down vs E11.5 * Ctrl |
| 10602592 Hsd17b10      | NM_016763    | 0.00610182   | -1.17876 | E11.5 * Sox10 down vs E11.5 * Ctrl |
| 10550365 Prkd2         | NM_178900    | 0.00822699   | -1.17887 | E11.5 * Sox10 down vs E11.5 * Ctrl |
| 10563355 Sec1          | NM_019934    | 0.00719624   | -1.17898 | E11.5 * Sox10 down vs E11.5 * Ctrl |
| 10532248 Rnf212        | ENSMUST00000 | 0.00661037   | -1.17913 | E11.5 * Sox10 down vs E11.5 * Ctrl |
| 10394392 Nfyc          | NM_008692    | 0.00274428   | -1.17917 | E11.5 * Sox10 down vs E11.5 * Ctrl |
| 10414333 Samd4         | NM_001037221 | 0.0075308    | -1.1793  | E11.5 * Sox10 down vs E11.5 * Ctrl |
| 10576561 2310079N02Rik | NM_025636    | 0.00897666   | -1.1796  | E11.5 * Sox10 down vs E11.5 * Ctrl |
| 10438425 Olfr167       | NM_146935    | 0.00195472   | -1.18008 | E11.5 * Sox10 down vs E11.5 * Ctrl |
| 10598038 Prf1          | X60165       | 0.00102805   | -1.18045 | E11.5 * Sox10 down vs E11.5 * Ctrl |
| 10440681 Krtap16-1     | NM_130870    | 0.00293423   | -1.18053 | E11.5 * Sox10 down vs E11.5 * Ctrl |
| 10557655 Srcap         | ENSMUST00000 | 0.00745392   | -1.18059 | E11.5 * Sox10 down vs E11.5 * Ctrl |
| 10608089 Ube1y1        | NM_011667    | 0.00693717   | -1.18068 | E11.5 * Sox10 down vs E11.5 * Ctrl |
| 10387620 Amac1         | NM_019871    | 0.00379395   | -1.18148 | E11.5 * Sox10 down vs E11.5 * Ctrl |
| 10394448 Pum2          | NM_030723    | 0.000979784  | -1.18152 | E11.5 * Sox10 down vs E11.5 * Ctrl |
| 10526232 Wbscr27       | NM_024479    | 0.00140021   | -1.18193 | E11.5 * Sox10 down vs E11.5 * Ctrl |
| 10464917 Cnih2         | NM_009920    | 0.00522154   | -1.18194 | E11.5 * Sox10 down vs E11.5 * Ctrl |
| 10564713 Mfge8         | NM_008594    | 0.00392564   | -1.18217 | E11.5 * Sox10 down vs E11.5 * Ctrl |
| 10567229 Smg1          | NM_001031814 | 0.000811805  | -1.18231 | E11.5 * Sox10 down vs E11.5 * Ctrl |

|          |               |              |              |          |                                    |
|----------|---------------|--------------|--------------|----------|------------------------------------|
| 10525955 | Fzd10         | NM_175284    | 0.00473929   | -1.18234 | E11.5 * Sox10 down vs E11.5 * Ctrl |
| 10457223 | Cdh11         | NM_009866    | 0.000138338  | -1.18262 | E11.5 * Sox10 down vs E11.5 * Ctrl |
| 10600480 | 4930408F14Rik | BC117726     | 0.00156993   | -1.18277 | E11.5 * Sox10 down vs E11.5 * Ctrl |
| 10603230 | 4930408F14Rik | BC117726     | 0.00156993   | -1.18277 | E11.5 * Sox10 down vs E11.5 * Ctrl |
| 10605353 | 4930408F14Rik | BC117726     | 0.00156993   | -1.18277 | E11.5 * Sox10 down vs E11.5 * Ctrl |
| 10479887 | Sec61a2       | NM_021305    | 0.00542431   | -1.18279 | E11.5 * Sox10 down vs E11.5 * Ctrl |
| 10443039 | Bnip1         | NM_172149    | 0.00572341   | -1.18285 | E11.5 * Sox10 down vs E11.5 * Ctrl |
| 10374413 | ---           | ---          | 0.00335851   | -1.18288 | E11.5 * Sox10 down vs E11.5 * Ctrl |
| 10590427 | Ccbp2         | NM_021609    | 0.00815363   | -1.18303 | E11.5 * Sox10 down vs E11.5 * Ctrl |
| 10421877 | Diap3         | NM_019670    | 0.00321775   | -1.18321 | E11.5 * Sox10 down vs E11.5 * Ctrl |
| 10411105 | ENSMUSG00000  | ENSMUST00000 | 0.00858753   | -1.18384 | E11.5 * Sox10 down vs E11.5 * Ctrl |
| 10436209 | Cblb          | NM_001033238 | 0.00807768   | -1.18395 | E11.5 * Sox10 down vs E11.5 * Ctrl |
| 10375515 | Ifi47         | NM_008330    | 0.000161337  | -1.18413 | E11.5 * Sox10 down vs E11.5 * Ctrl |
| 10449914 | 9030612M13Rik | NM_172458    | 0.00313101   | -1.18424 | E11.5 * Sox10 down vs E11.5 * Ctrl |
| 10408064 | Olfr11        | NM_146542    | 0.000940113  | -1.18464 | E11.5 * Sox10 down vs E11.5 * Ctrl |
| 10450872 | Olfr99        | NM_146515    | 0.0044762    | -1.1848  | E11.5 * Sox10 down vs E11.5 * Ctrl |
| 10468593 | Nrap          | NM_008733    | 0.00207271   | -1.18483 | E11.5 * Sox10 down vs E11.5 * Ctrl |
| 10603308 | ---           | ---          | 0.0068696    | -1.18498 | E11.5 * Sox10 down vs E11.5 * Ctrl |
| 10429462 | 1700016M24Rik | BC111897     | 0.00261419   | -1.18557 | E11.5 * Sox10 down vs E11.5 * Ctrl |
| 10569539 | Mrgprg        | NM_203492    | 0.00276764   | -1.18583 | E11.5 * Sox10 down vs E11.5 * Ctrl |
| 10598126 | Hhipl2        | BC034362     | 0.00362603   | -1.18599 | E11.5 * Sox10 down vs E11.5 * Ctrl |
| 10550715 | Trappc6a      | NM_025960    | 0.00210962   | -1.18611 | E11.5 * Sox10 down vs E11.5 * Ctrl |
| 10463513 | 4930505N22Rik | ENSMUST00000 | 0.00829579   | -1.18611 | E11.5 * Sox10 down vs E11.5 * Ctrl |
| 10454653 | ---           | ---          | 0.00373384   | -1.18653 | E11.5 * Sox10 down vs E11.5 * Ctrl |
| 10511282 | Tnfrsf4       | NM_011659    | 0.000868882  | -1.18663 | E11.5 * Sox10 down vs E11.5 * Ctrl |
| 10579538 | Tmem221       | NM_001100462 | 0.00185991   | -1.18667 | E11.5 * Sox10 down vs E11.5 * Ctrl |
| 10480321 | A930004D18Rik | ENSMUST00000 | 0.00625114   | -1.18682 | E11.5 * Sox10 down vs E11.5 * Ctrl |
| 10430974 | Arfgap3       | NM_025445    | 0.00221578   | -1.18691 | E11.5 * Sox10 down vs E11.5 * Ctrl |
| 10375472 | Timd4         | NM_178759    | 0.00493409   | -1.18696 | E11.5 * Sox10 down vs E11.5 * Ctrl |
| 10575021 | Zfp90         | NM_011764    | 1.78941e-005 | -1.18708 | E11.5 * Sox10 down vs E11.5 * Ctrl |
| 10383758 | Tug1          | NR_002321    | 0.00483767   | -1.18726 | E11.5 * Sox10 down vs E11.5 * Ctrl |
| 10457385 | Ccny          | NM_026484    | 0.000637831  | -1.18737 | E11.5 * Sox10 down vs E11.5 * Ctrl |
| 10351099 | Tnfsf18       | NM_183391    | 0.00520194   | -1.18742 | E11.5 * Sox10 down vs E11.5 * Ctrl |
| 10394846 | LOC100043371  | ENSMUST00000 | 0.00869241   | -1.18745 | E11.5 * Sox10 down vs E11.5 * Ctrl |
| 10602269 | ---           | ---          | 0.00407268   | -1.18745 | E11.5 * Sox10 down vs E11.5 * Ctrl |
| 10480238 | St8sia6       | NM_145838    | 0.0062689    | -1.1875  | E11.5 * Sox10 down vs E11.5 * Ctrl |
| 10352798 | Kcnh1         | NM_010600    | 0.00634978   | -1.18798 | E11.5 * Sox10 down vs E11.5 * Ctrl |
| 10345141 | Lmbrd1        | NM_026719    | 0.00356708   | -1.18852 | E11.5 * Sox10 down vs E11.5 * Ctrl |
| 10494411 | Rnu1b1        | NR_004412    | 0.00182111   | -1.18982 | E11.5 * Sox10 down vs E11.5 * Ctrl |
| 10494417 | Rnu1b1        | NR_004412    | 0.00182111   | -1.18982 | E11.5 * Sox10 down vs E11.5 * Ctrl |
| 10500356 | Rnu1b1        | NR_004412    | 0.00182111   | -1.18982 | E11.5 * Sox10 down vs E11.5 * Ctrl |
| 10353630 | Prf1          | X60165       | 0.000723324  | -1.18984 | E11.5 * Sox10 down vs E11.5 * Ctrl |
| 10509122 | Cnr2          | NM_009924    | 0.00653556   | -1.19003 | E11.5 * Sox10 down vs E11.5 * Ctrl |
| 10348424 | Sh3bp4        | NM_133816    | 0.00471141   | -1.19019 | E11.5 * Sox10 down vs E11.5 * Ctrl |
| 10489372 | 0610008F07Rik | BC025862     | 0.00697657   | -1.19022 | E11.5 * Sox10 down vs E11.5 * Ctrl |
| 10537710 | Tas2r144      | NM_001001453 | 0.00551934   | -1.19032 | E11.5 * Sox10 down vs E11.5 * Ctrl |
| 10399689 | ---           | ---          | 0.0070949    | -1.1904  | E11.5 * Sox10 down vs E11.5 * Ctrl |
| 10372656 | Cpsf6         | NM_001013391 | 0.00431786   | -1.19041 | E11.5 * Sox10 down vs E11.5 * Ctrl |
| 10476108 | Ebf4          | NM_001110513 | 0.00956221   | -1.19088 | E11.5 * Sox10 down vs E11.5 * Ctrl |
| 10592772 | Abcg4         | NM_138955    | 0.00276612   | -1.19094 | E11.5 * Sox10 down vs E11.5 * Ctrl |
| 10433101 | Gpr84         | NM_030720    | 0.00972937   | -1.19096 | E11.5 * Sox10 down vs E11.5 * Ctrl |
| 10507872 | ---           | ---          | 0.00363619   | -1.191   | E11.5 * Sox10 down vs E11.5 * Ctrl |
| 10417517 | ENSMUSG00000  | ENSMUST00000 | 0.0102821    | -1.19121 | E11.5 * Sox10 down vs E11.5 * Ctrl |
| 10529285 | Nkx1-1        | ENSMUST00000 | 0.00958503   | -1.19134 | E11.5 * Sox10 down vs E11.5 * Ctrl |
| 10572466 | Pde4c         | NM_201607    | 0.00233171   | -1.19149 | E11.5 * Sox10 down vs E11.5 * Ctrl |
| 10473356 | Ube2l6        | NM_019949    | 0.00908149   | -1.19155 | E11.5 * Sox10 down vs E11.5 * Ctrl |
| 10565591 | OTTMUSG00000  | ENSMUST00000 | 0.000967518  | -1.19175 | E11.5 * Sox10 down vs E11.5 * Ctrl |
| 10598059 | ND4L          | ENSMUST00000 | 0.00113706   | -1.19202 | E11.5 * Sox10 down vs E11.5 * Ctrl |
| 10499552 | Efna4         | NM_007910    | 0.00564797   | -1.19228 | E11.5 * Sox10 down vs E11.5 * Ctrl |
| 10562500 | Dpy19l3       | NM_178704    | 0.000107047  | -1.19244 | E11.5 * Sox10 down vs E11.5 * Ctrl |
| 10383511 | Tex19.1       | AF285590     | 0.00440422   | -1.19285 | E11.5 * Sox10 down vs E11.5 * Ctrl |
| 10405745 | ---           | ---          | 0.00460917   | -1.19324 | E11.5 * Sox10 down vs E11.5 * Ctrl |
| 10509178 | Asap3         | NM_001008232 | 0.00796489   | -1.19353 | E11.5 * Sox10 down vs E11.5 * Ctrl |
| 10548000 | Ltbr          | NM_010736    | 0.00117972   | -1.19421 | E11.5 * Sox10 down vs E11.5 * Ctrl |
| 10538526 | Avl9          | NM_030235    | 0.00560373   | -1.19451 | E11.5 * Sox10 down vs E11.5 * Ctrl |
| 10429843 | Plec1         | BC024074     | 0.00094866   | -1.19468 | E11.5 * Sox10 down vs E11.5 * Ctrl |

|          |               |              |              |          |                                    |
|----------|---------------|--------------|--------------|----------|------------------------------------|
| 10529613 | Evc           | NM_021292    | 0.000118701  | -1.19474 | E11.5 * Sox10 down vs E11.5 * Ctrl |
| 10576027 | ENSMUSG00000  | ENSMUST00000 | 0.000873772  | -1.1949  | E11.5 * Sox10 down vs E11.5 * Ctrl |
| 10553403 | Htatip2       | NM_001146049 | 0.00929588   | -1.19504 | E11.5 * Sox10 down vs E11.5 * Ctrl |
| 10584819 | ---           | ---          | 0.00312634   | -1.19535 | E11.5 * Sox10 down vs E11.5 * Ctrl |
| 10445781 | Trem2         | NM_031254    | 0.00209687   | -1.19551 | E11.5 * Sox10 down vs E11.5 * Ctrl |
| 10386402 | Zkscan17      | NM_172941    | 0.00155457   | -1.19574 | E11.5 * Sox10 down vs E11.5 * Ctrl |
| 10569100 | ---           | ---          | 0.00323631   | -1.19631 | E11.5 * Sox10 down vs E11.5 * Ctrl |
| 10504865 | Invs          | NM_010569    | 0.00687179   | -1.19641 | E11.5 * Sox10 down vs E11.5 * Ctrl |
| 10480288 | Nebi          | BC119802     | 0.00509434   | -1.19662 | E11.5 * Sox10 down vs E11.5 * Ctrl |
| 10414245 | 4930503E14Rik | NM_029131    | 0.0104066    | -1.19679 | E11.5 * Sox10 down vs E11.5 * Ctrl |
| 10436087 | Retnlb        | NM_023881    | 0.00196723   | -1.19687 | E11.5 * Sox10 down vs E11.5 * Ctrl |
| 10409014 | ---           | ---          | 0.01034      | -1.19697 | E11.5 * Sox10 down vs E11.5 * Ctrl |
| 10410576 | Cep72         | NM_028959    | 0.00832982   | -1.19702 | E11.5 * Sox10 down vs E11.5 * Ctrl |
| 10498477 | E130311K13Rik | NM_177856    | 0.00491763   | -1.19752 | E11.5 * Sox10 down vs E11.5 * Ctrl |
| 10416355 | Rcbtb2        | NM_134083    | 0.0093367    | -1.19781 | E11.5 * Sox10 down vs E11.5 * Ctrl |
| 10398224 | Cyp46a1       | NM_010010    | 0.00566851   | -1.19789 | E11.5 * Sox10 down vs E11.5 * Ctrl |
| 10381502 | 4930417O22Rik | ENSMUST00000 | 0.00689394   | -1.1979  | E11.5 * Sox10 down vs E11.5 * Ctrl |
| 10463082 | Cc2d2b        | XM_001000795 | 0.002433     | -1.19798 | E11.5 * Sox10 down vs E11.5 * Ctrl |
| 10601235 | Ogt           | NM_139144    | 0.000110759  | -1.19803 | E11.5 * Sox10 down vs E11.5 * Ctrl |
| 10597933 | ---           | ---          | 0.000166207  | -1.19879 | E11.5 * Sox10 down vs E11.5 * Ctrl |
| 10378126 | Ankfy1        | NM_009671    | 0.0017063    | -1.19903 | E11.5 * Sox10 down vs E11.5 * Ctrl |
| 10389207 | Ccl5          | NM_013653    | 0.00196029   | -1.19915 | E11.5 * Sox10 down vs E11.5 * Ctrl |
| 10592217 | Stt3a         | NM_008408    | 0.00378004   | -1.19938 | E11.5 * Sox10 down vs E11.5 * Ctrl |
| 10376394 | Olfr324       | NM_001011743 | 0.00980408   | -1.19968 | E11.5 * Sox10 down vs E11.5 * Ctrl |
| 10443946 | 1700029I08Rik | NM_183282    | 0.00601055   | -1.20049 | E11.5 * Sox10 down vs E11.5 * Ctrl |
| 10466216 | Ms4a2         | NM_013516    | 0.00312025   | -1.20063 | E11.5 * Sox10 down vs E11.5 * Ctrl |
| 10450529 | Dpcr1         | NM_001033366 | 0.00893561   | -1.20086 | E11.5 * Sox10 down vs E11.5 * Ctrl |
| 10484801 | Olfr1226      | NM_146967    | 0.00394087   | -1.20092 | E11.5 * Sox10 down vs E11.5 * Ctrl |
| 10518967 | 1190007F08Rik | ENSMUST00000 | 0.000813804  | -1.20099 | E11.5 * Sox10 down vs E11.5 * Ctrl |
| 10493816 | S100a5        | NM_011312    | 0.00221038   | -1.20101 | E11.5 * Sox10 down vs E11.5 * Ctrl |
| 10420614 | Sacs          | NM_172809    | 0.00388106   | -1.20124 | E11.5 * Sox10 down vs E11.5 * Ctrl |
| 10376144 | Fnip1         | NM_173753    | 0.00846134   | -1.20144 | E11.5 * Sox10 down vs E11.5 * Ctrl |
| 10346168 | Stat4         | NM_011487    | 0.00880802   | -1.20146 | E11.5 * Sox10 down vs E11.5 * Ctrl |
| 10528191 | Speer4d       | NM_025759    | 0.00123759   | -1.20172 | E11.5 * Sox10 down vs E11.5 * Ctrl |
| 10473217 | ---           | ---          | 0.0019497    | -1.20174 | E11.5 * Sox10 down vs E11.5 * Ctrl |
| 10582458 | Ankrd11       | NM_001081379 | 0.00530149   | -1.20175 | E11.5 * Sox10 down vs E11.5 * Ctrl |
| 10519578 | Abcb4         | NM_008830    | 0.00913696   | -1.20198 | E11.5 * Sox10 down vs E11.5 * Ctrl |
| 10591884 | Glb1l2        | NM_153803    | 0.00504085   | -1.20237 | E11.5 * Sox10 down vs E11.5 * Ctrl |
| 10423731 | ---           | ---          | 0.000746752  | -1.20253 | E11.5 * Sox10 down vs E11.5 * Ctrl |
| 10388042 | 6330403K07Rik | NM_134022    | 0.00127294   | -1.20272 | E11.5 * Sox10 down vs E11.5 * Ctrl |
| 10588154 | Stag1         | NM_009282    | 0.0047293    | -1.203   | E11.5 * Sox10 down vs E11.5 * Ctrl |
| 10520833 | Mrpl33        | NM_025796    | 0.00692897   | -1.20367 | E11.5 * Sox10 down vs E11.5 * Ctrl |
| 10507870 | ---           | ---          | 0.00379496   | -1.20382 | E11.5 * Sox10 down vs E11.5 * Ctrl |
| 10379721 | Ccl4          | NM_013652    | 0.000980024  | -1.20446 | E11.5 * Sox10 down vs E11.5 * Ctrl |
| 10417124 | B930095G15Rik | BC096543     | 0.000917069  | -1.20451 | E11.5 * Sox10 down vs E11.5 * Ctrl |
| 10399314 | Gm1964        | NM_001033488 | 0.00502859   | -1.20468 | E11.5 * Sox10 down vs E11.5 * Ctrl |
| 10578649 | Odz3          | NM_011857    | 0.00864462   | -1.20545 | E11.5 * Sox10 down vs E11.5 * Ctrl |
| 10373846 | Sec14l3       | NM_001029937 | 0.00910867   | -1.20551 | E11.5 * Sox10 down vs E11.5 * Ctrl |
| 10363379 | Cbara1        | NM_144822    | 0.00831066   | -1.20567 | E11.5 * Sox10 down vs E11.5 * Ctrl |
| 10461160 | ---           | ---          | 0.00787559   | -1.20569 | E11.5 * Sox10 down vs E11.5 * Ctrl |
| 10375751 | Adamts2       | NM_175643    | 0.00471525   | -1.20573 | E11.5 * Sox10 down vs E11.5 * Ctrl |
| 10391742 | Gpatch8       | NM_001159492 | 0.00710253   | -1.20586 | E11.5 * Sox10 down vs E11.5 * Ctrl |
| 10601854 | Wbp5          | NM_011712    | 0.00032741   | -1.20594 | E11.5 * Sox10 down vs E11.5 * Ctrl |
| 10438572 | 2510009E07Rik | NM_001001881 | 0.000645369  | -1.20602 | E11.5 * Sox10 down vs E11.5 * Ctrl |
| 10536898 | Irf5          | NM_012057    | 0.00194994   | -1.20603 | E11.5 * Sox10 down vs E11.5 * Ctrl |
| 10412719 | Synpr         | NM_028052    | 0.00359978   | -1.20635 | E11.5 * Sox10 down vs E11.5 * Ctrl |
| 10505064 | Tmem38b       | NM_028053    | 0.00465901   | -1.20663 | E11.5 * Sox10 down vs E11.5 * Ctrl |
| 10483633 | Sp3           | NM_001018042 | 0.00998367   | -1.20682 | E11.5 * Sox10 down vs E11.5 * Ctrl |
| 10534988 | ---           | ---          | 0.0011669    | -1.20721 | E11.5 * Sox10 down vs E11.5 * Ctrl |
| 10576034 | Irf8          | NM_008320    | 0.000964443  | -1.20751 | E11.5 * Sox10 down vs E11.5 * Ctrl |
| 10538438 | C330043M08Rik | NM_001142781 | 0.00110483   | -1.20757 | E11.5 * Sox10 down vs E11.5 * Ctrl |
| 10516784 | ---           | ---          | 0.00163913   | -1.2077  | E11.5 * Sox10 down vs E11.5 * Ctrl |
| 10578262 | ---           | ---          | 4.69672e-005 | -1.20775 | E11.5 * Sox10 down vs E11.5 * Ctrl |
| 10531342 | U90926        | U90926       | 0.000476244  | -1.20779 | E11.5 * Sox10 down vs E11.5 * Ctrl |
| 10411804 | Mast4         | ENSMUST00000 | 0.000790096  | -1.20796 | E11.5 * Sox10 down vs E11.5 * Ctrl |
| 10544798 | Hoxa10        | NM_008263    | 0.00631698   | -1.208   | E11.5 * Sox10 down vs E11.5 * Ctrl |

|                        |               |              |          |                                    |
|------------------------|---------------|--------------|----------|------------------------------------|
| 10397359 Batf          | NM_016767     | 0.000595339  | -1.20815 | E11.5 * Sox10 down vs E11.5 * Ctrl |
| 10396383 Slc38a6       | BC157917      | 0.00307768   | -1.20818 | E11.5 * Sox10 down vs E11.5 * Ctrl |
| 10454912 Ankhd1        | NM_175375     | 0.00235942   | -1.2082  | E11.5 * Sox10 down vs E11.5 * Ctrl |
| 10396956 Pcnx          | NM_018814     | 0.00100983   | -1.20856 | E11.5 * Sox10 down vs E11.5 * Ctrl |
| 10426261 Shank3        | NM_021423     | 0.00135607   | -1.20919 | E11.5 * Sox10 down vs E11.5 * Ctrl |
| 10446656 Lpin2         | NM_022882     | 0.00548243   | -1.20933 | E11.5 * Sox10 down vs E11.5 * Ctrl |
| 10506110 L1td1         | NM_001081202  | 0.00649907   | -1.20933 | E11.5 * Sox10 down vs E11.5 * Ctrl |
| 10528236               | ---           | 0.00145248   | -1.20939 | E11.5 * Sox10 down vs E11.5 * Ctrl |
| 10357932 Ppp1r12b      | NM_001081307  | 0.000176101  | -1.20959 | E11.5 * Sox10 down vs E11.5 * Ctrl |
| 10358299 EG214403      | NM_001029977  | 0.00299648   | -1.21    | E11.5 * Sox10 down vs E11.5 * Ctrl |
| 10477286 Pofut1        | NM_080463     | 0.00137379   | -1.21052 | E11.5 * Sox10 down vs E11.5 * Ctrl |
| 10396278 Daam1         | NM_026102     | 0.00250219   | -1.2106  | E11.5 * Sox10 down vs E11.5 * Ctrl |
| 10605542 2410003J06Rik | NM_001113734  | 0.000728095  | -1.21062 | E11.5 * Sox10 down vs E11.5 * Ctrl |
| 10418702 Sh3bp5        | NM_011894     | 0.000197352  | -1.21068 | E11.5 * Sox10 down vs E11.5 * Ctrl |
| 10377859 Pld2          | NM_008876     | 0.00258518   | -1.21091 | E11.5 * Sox10 down vs E11.5 * Ctrl |
| 10350046 Kdm5b         | NM_152895     | 4.75103e-005 | -1.21111 | E11.5 * Sox10 down vs E11.5 * Ctrl |
| 10447773 Slc22a3       | NM_011395     | 0.00647347   | -1.21165 | E11.5 * Sox10 down vs E11.5 * Ctrl |
| 10519879 Speer4f       | NM_027609     | 0.00644468   | -1.21168 | E11.5 * Sox10 down vs E11.5 * Ctrl |
| 10522925 Prol1         | NM_008644     | 0.00948057   | -1.21176 | E11.5 * Sox10 down vs E11.5 * Ctrl |
| 10512487 Rmrp          | NR_001460     | 0.0102484    | -1.21205 | E11.5 * Sox10 down vs E11.5 * Ctrl |
| 10491056 Tbl1xr1       | NM_030732     | 0.00395268   | -1.21206 | E11.5 * Sox10 down vs E11.5 * Ctrl |
| 10500103 Gabpb2        | NM_029885     | 9.01492e-005 | -1.21206 | E11.5 * Sox10 down vs E11.5 * Ctrl |
| 10399189 Sp8           | NM_177082     | 0.000190662  | -1.21215 | E11.5 * Sox10 down vs E11.5 * Ctrl |
| 10554063 Adamts17      | NM_001033877  | 0.00727204   | -1.21215 | E11.5 * Sox10 down vs E11.5 * Ctrl |
| 10547795 Atn1          | NM_007881     | 0.00801605   | -1.21233 | E11.5 * Sox10 down vs E11.5 * Ctrl |
| 10369748 EG631906      | ENSMUST000000 | 0.000362183  | -1.2124  | E11.5 * Sox10 down vs E11.5 * Ctrl |
| 10582337 Fam38a        | ENSMUST000000 | 0.00293459   | -1.21265 | E11.5 * Sox10 down vs E11.5 * Ctrl |
| 10563657               | ---           | 0.00623812   | -1.21314 | E11.5 * Sox10 down vs E11.5 * Ctrl |
| 10441344 Rbm16         | BC075621      | 0.00409      | -1.21331 | E11.5 * Sox10 down vs E11.5 * Ctrl |
| 10595871 Clstn2        | NM_022319     | 0.000209172  | -1.2135  | E11.5 * Sox10 down vs E11.5 * Ctrl |
| 10538547 Fkbp9         | NM_012056     | 0.00466956   | -1.21353 | E11.5 * Sox10 down vs E11.5 * Ctrl |
| 10497222 Zfp704        | NM_133218     | 0.00478668   | -1.21358 | E11.5 * Sox10 down vs E11.5 * Ctrl |
| 10355329 Bard1         | NM_007525     | 0.00519773   | -1.21363 | E11.5 * Sox10 down vs E11.5 * Ctrl |
| 10402063 Foxn3         | BC029185      | 0.000772029  | -1.21365 | E11.5 * Sox10 down vs E11.5 * Ctrl |
| 10346799 Icos          | NM_017480     | 0.00387598   | -1.21412 | E11.5 * Sox10 down vs E11.5 * Ctrl |
| 10413161 Cnot1         | NM_153164     | 0.000318043  | -1.21438 | E11.5 * Sox10 down vs E11.5 * Ctrl |
| 10499766 Slc27a3       | NM_011988     | 0.00501241   | -1.21441 | E11.5 * Sox10 down vs E11.5 * Ctrl |
| 10362245 Epb4.1l2      | NM_013511     | 3.51416e-005 | -1.21457 | E11.5 * Sox10 down vs E11.5 * Ctrl |
| 10546272 Iqsec1        | NM_001134384  | 0.00190762   | -1.21457 | E11.5 * Sox10 down vs E11.5 * Ctrl |
| 10396511 Syne2         | NM_001005510  | 0.00189428   | -1.21462 | E11.5 * Sox10 down vs E11.5 * Ctrl |
| 10513162 Ptpn3         | NM_011207     | 0.00920362   | -1.21524 | E11.5 * Sox10 down vs E11.5 * Ctrl |
| 10405743               | ---           | 0.00227531   | -1.21524 | E11.5 * Sox10 down vs E11.5 * Ctrl |
| 10465244 Malat1        | NR_002847     | 0.00295839   | -1.21526 | E11.5 * Sox10 down vs E11.5 * Ctrl |
| 10344821 Cspp1         | NM_026493     | 0.00636613   | -1.21528 | E11.5 * Sox10 down vs E11.5 * Ctrl |
| 10368473               | ---           | 0.000421087  | -1.21569 | E11.5 * Sox10 down vs E11.5 * Ctrl |
| 10440727 Krtap8-1      | ENSMUST000000 | 0.00673759   | -1.21605 | E11.5 * Sox10 down vs E11.5 * Ctrl |
| 10605651 4930415L06Rik | ENSMUST000000 | 0.0016746    | -1.21619 | E11.5 * Sox10 down vs E11.5 * Ctrl |
| 10391685 Fam171a2      | NM_199200     | 0.00166865   | -1.2162  | E11.5 * Sox10 down vs E11.5 * Ctrl |
| 10552475 Klk12         | NM_027097     | 0.00415646   | -1.21623 | E11.5 * Sox10 down vs E11.5 * Ctrl |
| 10603860 Cfp           | NM_008823     | 0.0103236    | -1.21624 | E11.5 * Sox10 down vs E11.5 * Ctrl |
| 10414154               | ---           | 0.00342487   | -1.21635 | E11.5 * Sox10 down vs E11.5 * Ctrl |
| 10601503 Dach2         | NM_033605     | 0.00345564   | -1.21651 | E11.5 * Sox10 down vs E11.5 * Ctrl |
| 10409924 Cts8          | NM_019541     | 0.00280842   | -1.21658 | E11.5 * Sox10 down vs E11.5 * Ctrl |
| 10445688 Ccnd3         | NM_001081636  | 0.00366249   | -1.21664 | E11.5 * Sox10 down vs E11.5 * Ctrl |
| 10470584 Tsc1          | NM_022887     | 0.000749051  | -1.21668 | E11.5 * Sox10 down vs E11.5 * Ctrl |
| 10435237 Zfp148        | NM_011749     | 0.000449059  | -1.21687 | E11.5 * Sox10 down vs E11.5 * Ctrl |
| 10408490 Exoc2         | NM_025588     | 5.82334e-005 | -1.21692 | E11.5 * Sox10 down vs E11.5 * Ctrl |
| 10382848 1110005A03Rik | BC026936      | 0.00107488   | -1.21725 | E11.5 * Sox10 down vs E11.5 * Ctrl |
| 10494413 Rnu1b1        | NR_004412     | 0.00019262   | -1.21735 | E11.5 * Sox10 down vs E11.5 * Ctrl |
| 10494421 Rnu1b1        | NR_004412     | 0.00019262   | -1.21735 | E11.5 * Sox10 down vs E11.5 * Ctrl |
| 10500343 Rnu1b1        | NR_004412     | 0.00019262   | -1.21735 | E11.5 * Sox10 down vs E11.5 * Ctrl |
| 10500358 Rnu1b1        | NR_004412     | 0.00019262   | -1.21735 | E11.5 * Sox10 down vs E11.5 * Ctrl |
| 10512937 Rnu1b1        | NR_004412     | 0.00019262   | -1.21735 | E11.5 * Sox10 down vs E11.5 * Ctrl |
| 10411464 Fcho2         | NM_172591     | 0.00623687   | -1.21775 | E11.5 * Sox10 down vs E11.5 * Ctrl |
| 10607059 Irs4          | NM_010572     | 0.00198181   | -1.21781 | E11.5 * Sox10 down vs E11.5 * Ctrl |
| 10374771               | ---           | 0.0100241    | -1.21795 | E11.5 * Sox10 down vs E11.5 * Ctrl |

|                              |              |              |                                    |                                    |
|------------------------------|--------------|--------------|------------------------------------|------------------------------------|
| 10490852                     | ---          | 0.00566301   | -1.21797                           | E11.5 * Sox10 down vs E11.5 * Ctrl |
| 10464171 Tdrd1               | NM_001002238 | 0.000473349  | -1.21806                           | E11.5 * Sox10 down vs E11.5 * Ctrl |
| 10372342 Nav3                | NM_001081035 | 0.00519685   | -1.21849                           | E11.5 * Sox10 down vs E11.5 * Ctrl |
| 10539692 Tgfa                | NM_031199    | 0.00689845   | -1.21857                           | E11.5 * Sox10 down vs E11.5 * Ctrl |
| 10536170 Pigt                | AB057593     | 0.00161254   | -1.21858                           | E11.5 * Sox10 down vs E11.5 * Ctrl |
| 10545208 Gm189               | ENSMUST00000 | 0.00221024   | -1.21934                           | E11.5 * Sox10 down vs E11.5 * Ctrl |
| 10428302 Klf10               | NM_013692    | 0.00258375   | -1.21937                           | E11.5 * Sox10 down vs E11.5 * Ctrl |
| 10544219 Braf                | NM_139294    | 0.00802063   | -1.21968                           | E11.5 * Sox10 down vs E11.5 * Ctrl |
| 10471819 Crb2                | ENSMUST00000 | 0.00892746   | -1.21968                           | E11.5 * Sox10 down vs E11.5 * Ctrl |
| 10389738 Dgke                | NM_019505    | 0.006098     | -1.21989                           | E11.5 * Sox10 down vs E11.5 * Ctrl |
| 10501879 Usp53               | NM_133857    | 0.00997469   | -1.22008                           | E11.5 * Sox10 down vs E11.5 * Ctrl |
| 10459510                     | ---          | 0.00686085   | -1.2203                            | E11.5 * Sox10 down vs E11.5 * Ctrl |
| 10587829 Plod2               | NM_001142916 | 0.00171007   | -1.22035                           | E11.5 * Sox10 down vs E11.5 * Ctrl |
| 10571321 Ppp1r3b             | NM_177741    | 0.00336725   | -1.22035                           | E11.5 * Sox10 down vs E11.5 * Ctrl |
| 10481304 Gfi1b               | NM_008114    | 0.00887757   | -1.22039                           | E11.5 * Sox10 down vs E11.5 * Ctrl |
| 10555186 Wnt11               | NM_009519    | 0.00209813   | -1.22044                           | E11.5 * Sox10 down vs E11.5 * Ctrl |
| 10415742 Mipep               | NM_027436    | 0.00661021   | -1.22047                           | E11.5 * Sox10 down vs E11.5 * Ctrl |
| 10384782 Vrk2                | NM_027260    | 0.00486696   | -1.22069                           | E11.5 * Sox10 down vs E11.5 * Ctrl |
| 10405741 100041437 XR_030564 | 0.0014448    | -1.22078     | E11.5 * Sox10 down vs E11.5 * Ctrl |                                    |
| 10581214 Lrrc29              | NM_177449    | 0.0104208    | -1.22081                           | E11.5 * Sox10 down vs E11.5 * Ctrl |
| 10424381                     | ---          | 0.000843664  | -1.22142                           | E11.5 * Sox10 down vs E11.5 * Ctrl |
| 10577337 Defb40              | NM_183039    | 0.00858127   | -1.22148                           | E11.5 * Sox10 down vs E11.5 * Ctrl |
| 10360858 C130074G19Rik       | NM_178692    | 0.00839423   | -1.22148                           | E11.5 * Sox10 down vs E11.5 * Ctrl |
| 10485372 Rag1                | NM_009019    | 0.00929973   | -1.22153                           | E11.5 * Sox10 down vs E11.5 * Ctrl |
| 10489241 Gm826               | NM_001033411 | 0.00345072   | -1.22155                           | E11.5 * Sox10 down vs E11.5 * Ctrl |
| 10602772 Rps6ka3             | NM_148945    | 0.00661141   | -1.22161                           | E11.5 * Sox10 down vs E11.5 * Ctrl |
| 10351603 Arhgap30            | NM_001005508 | 0.00736591   | -1.22178                           | E11.5 * Sox10 down vs E11.5 * Ctrl |
| 10487238 Hdc                 | NM_008230    | 0.00342784   | -1.22186                           | E11.5 * Sox10 down vs E11.5 * Ctrl |
| 10450374 D17H6S56E-5         | L78788       | 0.00596741   | -1.22194                           | E11.5 * Sox10 down vs E11.5 * Ctrl |
| 10351500                     | ---          | 0.00364266   | -1.22199                           | E11.5 * Sox10 down vs E11.5 * Ctrl |
| 10516590 Zbtb8a              | NM_028603    | 0.00872169   | -1.22201                           | E11.5 * Sox10 down vs E11.5 * Ctrl |
| 10427461 Ptger4              | NM_001136079 | 0.00605551   | -1.22203                           | E11.5 * Sox10 down vs E11.5 * Ctrl |
| 10400052 4930579E17Rik       | NM_178629    | 0.00433422   | -1.2221                            | E11.5 * Sox10 down vs E11.5 * Ctrl |
| 10372385 Zdhc17              | NM_172554    | 0.00327643   | -1.22213                           | E11.5 * Sox10 down vs E11.5 * Ctrl |
| 10519060 Tnfrsf14            | NM_178931    | 0.00210202   | -1.22217                           | E11.5 * Sox10 down vs E11.5 * Ctrl |
| 10542857 Far2                | NM_178797    | 0.00212467   | -1.22218                           | E11.5 * Sox10 down vs E11.5 * Ctrl |
| 10542691 Lrmp                | NM_008511    | 0.00807896   | -1.22228                           | E11.5 * Sox10 down vs E11.5 * Ctrl |
| 10434283 LOC635992           | ENSMUST00000 | 0.000663396  | -1.22234                           | E11.5 * Sox10 down vs E11.5 * Ctrl |
| 10500100 Tnfaip8l2           | NM_027206    | 0.00620171   | -1.22245                           | E11.5 * Sox10 down vs E11.5 * Ctrl |
| 10577412 6820431F20Rik       | BC025151     | 0.000124227  | -1.22259                           | E11.5 * Sox10 down vs E11.5 * Ctrl |
| 10439667 BC016579            | NM_145389    | 0.00118421   | -1.22265                           | E11.5 * Sox10 down vs E11.5 * Ctrl |
| 10391378 Ezh1                | NM_007970    | 2.77834e-005 | -1.2227                            | E11.5 * Sox10 down vs E11.5 * Ctrl |
| 10351515 Rnu1b1              | NR_004412    | 0.000476165  | -1.22283                           | E11.5 * Sox10 down vs E11.5 * Ctrl |
| 10554650 1700010L04Rik       | ENSMUST00000 | 0.00654321   | -1.22292                           | E11.5 * Sox10 down vs E11.5 * Ctrl |
| 10417912 Usp54               | NM_030180    | 0.00277443   | -1.22293                           | E11.5 * Sox10 down vs E11.5 * Ctrl |
| 10406086 Tert                | NM_009354    | 0.00510854   | -1.22298                           | E11.5 * Sox10 down vs E11.5 * Ctrl |
| 10460237 Unc93b1             | NM_019449    | 0.00408539   | -1.22303                           | E11.5 * Sox10 down vs E11.5 * Ctrl |
| 10549473 Caprin2             | NM_181541    | 0.000859206  | -1.22331                           | E11.5 * Sox10 down vs E11.5 * Ctrl |
| 10374621 Ahsa2               | NM_172391    | 8.18813e-005 | -1.2234                            | E11.5 * Sox10 down vs E11.5 * Ctrl |
| 10559420 Tmc4                | NM_181820    | 0.000687763  | -1.22403                           | E11.5 * Sox10 down vs E11.5 * Ctrl |
| 10497613 ENSMUSG00000        | ENSMUST00000 | 0.000947324  | -1.22453                           | E11.5 * Sox10 down vs E11.5 * Ctrl |
| 10544497 Tarbp2              | NM_009319    | 0.00320378   | -1.22533                           | E11.5 * Sox10 down vs E11.5 * Ctrl |
| 10425430 Tnrc6b              | NM_144812    | 0.00388281   | -1.2254                            | E11.5 * Sox10 down vs E11.5 * Ctrl |
| 10549733 A430110N23Rik       | NM_173008    | 0.00999421   | -1.22564                           | E11.5 * Sox10 down vs E11.5 * Ctrl |
| 10440463 LOC436427           | XR_034439    | 0.000711829  | -1.22632                           | E11.5 * Sox10 down vs E11.5 * Ctrl |
| 10587686                     | ---          | 0.00240043   | -1.22643                           | E11.5 * Sox10 down vs E11.5 * Ctrl |
| 10595628                     | ---          | 0.00240043   | -1.22643                           | E11.5 * Sox10 down vs E11.5 * Ctrl |
| 10359734 Iqwd1               | ENSMUST00000 | 0.00232601   | -1.22668                           | E11.5 * Sox10 down vs E11.5 * Ctrl |
| 10345037 Paqr8               | NM_028829    | 7.2486e-006  | -1.22676                           | E11.5 * Sox10 down vs E11.5 * Ctrl |
| 10537676 1700034O15Rik       | BC048592     | 0.00280804   | -1.2268                            | E11.5 * Sox10 down vs E11.5 * Ctrl |
| 10597554 Zcwpw2              | BC104378     | 0.0029893    | -1.22701                           | E11.5 * Sox10 down vs E11.5 * Ctrl |
| 10373502 Ikzf4               | NM_011772    | 0.00197765   | -1.22708                           | E11.5 * Sox10 down vs E11.5 * Ctrl |
| 10550605 Eml2                | BC055476     | 0.00116594   | -1.22719                           | E11.5 * Sox10 down vs E11.5 * Ctrl |
| 10586880 Suhw4               | NM_146224    | 0.00579432   | -1.2272                            | E11.5 * Sox10 down vs E11.5 * Ctrl |
| 10373340 Rbms2               | NM_001039080 | 0.00725895   | -1.22722                           | E11.5 * Sox10 down vs E11.5 * Ctrl |
| 10540897 Pparg               | NM_001127330 | 0.0090824    | -1.22726                           | E11.5 * Sox10 down vs E11.5 * Ctrl |

|                        |              |              |          |                                    |
|------------------------|--------------|--------------|----------|------------------------------------|
| 10547993               | ---          | 0.00599842   | -1.22793 | E11.5 * Sox10 down vs E11.5 * Ctrl |
| 10516765 Serinc2       | NM_172702    | 0.00367621   | -1.22798 | E11.5 * Sox10 down vs E11.5 * Ctrl |
| 10468307 EG629389      | XM_894271    | 0.00958296   | -1.22813 | E11.5 * Sox10 down vs E11.5 * Ctrl |
| 10404287 Prl3c1        | NM_013766    | 0.00290942   | -1.22829 | E11.5 * Sox10 down vs E11.5 * Ctrl |
| 10366004 Atp2b1        | NM_026482    | 2.78769e-007 | -1.22839 | E11.5 * Sox10 down vs E11.5 * Ctrl |
| 10531794 Wdfy3         | AB093277     | 0.00494497   | -1.22856 | E11.5 * Sox10 down vs E11.5 * Ctrl |
| 10545588 Hk2           | NM_013820    | 0.00297114   | -1.22869 | E11.5 * Sox10 down vs E11.5 * Ctrl |
| 10586306 Igdcc4        | NM_020043    | 0.00474103   | -1.22908 | E11.5 * Sox10 down vs E11.5 * Ctrl |
| 10579089 D330038O06Rik | NM_177899    | 0.00231644   | -1.22911 | E11.5 * Sox10 down vs E11.5 * Ctrl |
| 10588701 Hyal3         | NM_178020    | 0.00310938   | -1.22937 | E11.5 * Sox10 down vs E11.5 * Ctrl |
| 10353624 ND4L          | ENSMUST00000 | 0.00154329   | -1.22953 | E11.5 * Sox10 down vs E11.5 * Ctrl |
| 10542140 Klrb1f        | NM_153094    | 0.0046403    | -1.22953 | E11.5 * Sox10 down vs E11.5 * Ctrl |
| 10513160 Ptpn3         | NM_011207    | 0.00812258   | -1.22959 | E11.5 * Sox10 down vs E11.5 * Ctrl |
| 10522712 Rest          | NM_011263    | 0.00798164   | -1.23047 | E11.5 * Sox10 down vs E11.5 * Ctrl |
| 10563659 Spty2d1       | NM_175318    | 0.00525776   | -1.23055 | E11.5 * Sox10 down vs E11.5 * Ctrl |
| 10378240 P2rx1         | NM_008771    | 0.000651078  | -1.23068 | E11.5 * Sox10 down vs E11.5 * Ctrl |
| 10503615               | ---          | 0.00372189   | -1.23089 | E11.5 * Sox10 down vs E11.5 * Ctrl |
| 10474860 Chst14        | NM_028117    | 0.00200525   | -1.23119 | E11.5 * Sox10 down vs E11.5 * Ctrl |
| 10497399 Pde7a         | NM_001122759 | 0.00060181   | -1.23119 | E11.5 * Sox10 down vs E11.5 * Ctrl |
| 10371356 Appl2         | NM_145220    | 0.00162379   | -1.23163 | E11.5 * Sox10 down vs E11.5 * Ctrl |
| 10445078 Gabbr1        | NM_019439    | 0.00514429   | -1.23175 | E11.5 * Sox10 down vs E11.5 * Ctrl |
| 10487321 2010106G01Rik | NM_023220    | 0.00139042   | -1.23188 | E11.5 * Sox10 down vs E11.5 * Ctrl |
| 10432939 Csad          | NM_144942    | 0.00504887   | -1.23216 | E11.5 * Sox10 down vs E11.5 * Ctrl |
| 10591988 Adamts15      | NM_001024139 | 0.00938062   | -1.23246 | E11.5 * Sox10 down vs E11.5 * Ctrl |
| 10518346 OTTMUSG00000  | NM_001085522 | 0.0103808    | -1.23314 | E11.5 * Sox10 down vs E11.5 * Ctrl |
| 10588942 Lamb2         | NM_008483    | 0.00635793   | -1.23314 | E11.5 * Sox10 down vs E11.5 * Ctrl |
| 10573419 Lyl1          | NM_008535    | 0.00111408   | -1.23317 | E11.5 * Sox10 down vs E11.5 * Ctrl |
| 10591660 Epor          | NM_010149    | 7.33203e-005 | -1.23352 | E11.5 * Sox10 down vs E11.5 * Ctrl |
| 10345752 Il1r2         | NM_010555    | 0.00454338   | -1.23375 | E11.5 * Sox10 down vs E11.5 * Ctrl |
| 10558295 Zranb1        | ENSMUST00000 | 0.00788422   | -1.23395 | E11.5 * Sox10 down vs E11.5 * Ctrl |
| 10574727 Slc9a5        | NM_001081332 | 0.000523582  | -1.23397 | E11.5 * Sox10 down vs E11.5 * Ctrl |
| 10526459 Rasa4         | NM_133914    | 0.00643507   | -1.23416 | E11.5 * Sox10 down vs E11.5 * Ctrl |
| 10566822 Scube2        | NM_020052    | 0.00063712   | -1.23418 | E11.5 * Sox10 down vs E11.5 * Ctrl |
| 10433480 Rpl39l        | NM_026594    | 0.000660175  | -1.23421 | E11.5 * Sox10 down vs E11.5 * Ctrl |
| 10437928 0610037P05Rik | BC011300     | 0.000413466  | -1.23438 | E11.5 * Sox10 down vs E11.5 * Ctrl |
| 10455738 Snx2          | NM_026386    | 0.000132859  | -1.23442 | E11.5 * Sox10 down vs E11.5 * Ctrl |
| 10550263 Slc8a2        | NM_148946    | 0.00296394   | -1.23452 | E11.5 * Sox10 down vs E11.5 * Ctrl |
| 10403750 2810021B07Rik | NM_025479    | 0.00296283   | -1.23554 | E11.5 * Sox10 down vs E11.5 * Ctrl |
| 10569313 6330512M04Rik | NM_177265    | 0.0041418    | -1.23561 | E11.5 * Sox10 down vs E11.5 * Ctrl |
| 10510178 OTTMUSG00000  | NM_001037926 | 0.00320452   | -1.23563 | E11.5 * Sox10 down vs E11.5 * Ctrl |
| 10535091 4930432F04Rik | BC016220     | 0.000640371  | -1.23563 | E11.5 * Sox10 down vs E11.5 * Ctrl |
| 10461745               | ---          | 0.00732576   | -1.23588 | E11.5 * Sox10 down vs E11.5 * Ctrl |
| 10593430 Sik2          | NM_178710    | 0.00133932   | -1.23599 | E11.5 * Sox10 down vs E11.5 * Ctrl |
| 10543333 Aass          | NM_013930    | 0.000722791  | -1.23602 | E11.5 * Sox10 down vs E11.5 * Ctrl |
| 10421581 Lrch1         | NM_001033439 | 0.000361712  | -1.23602 | E11.5 * Sox10 down vs E11.5 * Ctrl |
| 10493292 2810403A07Rik | AK173057     | 0.000132444  | -1.23607 | E11.5 * Sox10 down vs E11.5 * Ctrl |
| 10476353               | ---          | 0.00592168   | -1.23612 | E11.5 * Sox10 down vs E11.5 * Ctrl |
| 10585543 EG665005      | XR_030731    | 0.00697652   | -1.2362  | E11.5 * Sox10 down vs E11.5 * Ctrl |
| 10456812 Hdhd2         | ENSMUST00000 | 0.00925293   | -1.23633 | E11.5 * Sox10 down vs E11.5 * Ctrl |
| 10477311 Asxl1         | NM_001039939 | 0.000680586  | -1.23639 | E11.5 * Sox10 down vs E11.5 * Ctrl |
| 10497622 Lrrc34        | NM_027941    | 0.000290689  | -1.23664 | E11.5 * Sox10 down vs E11.5 * Ctrl |
| 10407173 Il6st         | NM_010560    | 0.000324901  | -1.23674 | E11.5 * Sox10 down vs E11.5 * Ctrl |
| 10367024 Tac2          | NM_009312    | 0.00628947   | -1.237   | E11.5 * Sox10 down vs E11.5 * Ctrl |
| 10446473 Lama1         | NM_008480    | 0.000851694  | -1.23708 | E11.5 * Sox10 down vs E11.5 * Ctrl |
| 10508249 OTTMUSG00000  | NM_001099319 | 0.00573839   | -1.23716 | E11.5 * Sox10 down vs E11.5 * Ctrl |
| 10544756 Hoxa3         | NM_010452    | 6.03805e-005 | -1.23722 | E11.5 * Sox10 down vs E11.5 * Ctrl |
| 10356423 Usp40         | NM_001033291 | 0.00213364   | -1.23755 | E11.5 * Sox10 down vs E11.5 * Ctrl |
| 10594404 Smad3         | NM_016769    | 0.00385179   | -1.2376  | E11.5 * Sox10 down vs E11.5 * Ctrl |
| 10411229 F2r           | NM_010169    | 0.000223671  | -1.23768 | E11.5 * Sox10 down vs E11.5 * Ctrl |
| 10464328 Pnliprp2      | NM_011128    | 0.00281488   | -1.23795 | E11.5 * Sox10 down vs E11.5 * Ctrl |
| 10531348 Ppef2         | NM_011148    | 2.84606e-005 | -1.23813 | E11.5 * Sox10 down vs E11.5 * Ctrl |
| 10448878 Baiap3        | BC158116     | 0.000316537  | -1.23815 | E11.5 * Sox10 down vs E11.5 * Ctrl |
| 10513592 Wdr31         | NM_023597    | 0.00973515   | -1.23824 | E11.5 * Sox10 down vs E11.5 * Ctrl |
| 10415248 Pck2          | NM_028994    | 0.00048475   | -1.23905 | E11.5 * Sox10 down vs E11.5 * Ctrl |
| 10551696 Rasgrp4       | NM_145149    | 0.000366634  | -1.23925 | E11.5 * Sox10 down vs E11.5 * Ctrl |
| 10580782 Dok4          | NM_053246    | 0.000298914  | -1.23929 | E11.5 * Sox10 down vs E11.5 * Ctrl |

|          |               |              |              |          |                                    |
|----------|---------------|--------------|--------------|----------|------------------------------------|
| 10382425 | Gprc5c        | NM_001110337 | 0.000985972  | -1.23935 | E11.5 * Sox10 down vs E11.5 * Ctrl |
| 10600953 | Eda           | NM_010099    | 0.00996844   | -1.23949 | E11.5 * Sox10 down vs E11.5 * Ctrl |
| 10447294 | Prkce         | NM_011104    | 0.00247267   | -1.23949 | E11.5 * Sox10 down vs E11.5 * Ctrl |
| 10555389 | Ucp2          | NM_011671    | 0.00815104   | -1.23965 | E11.5 * Sox10 down vs E11.5 * Ctrl |
| 10437210 | Bace2         | NM_019517    | 0.00117853   | -1.23968 | E11.5 * Sox10 down vs E11.5 * Ctrl |
| 10559837 | Vmn2r29       | NR_003555    | 0.00412152   | -1.23978 | E11.5 * Sox10 down vs E11.5 * Ctrl |
| 10500534 | Hsd3b4        | NM_001111336 | 0.00303456   | -1.23983 | E11.5 * Sox10 down vs E11.5 * Ctrl |
| 10500539 | Hsd3b4        | NM_001111336 | 0.00303456   | -1.23983 | E11.5 * Sox10 down vs E11.5 * Ctrl |
| 10499811 | Npr1          | NM_008727    | 0.00379637   | -1.24018 | E11.5 * Sox10 down vs E11.5 * Ctrl |
| 10439854 | Bbx           | NM_027444    | 0.0032756    | -1.24068 | E11.5 * Sox10 down vs E11.5 * Ctrl |
| 10504132 | Ccl19         | NM_011888    | 0.00391273   | -1.24079 | E11.5 * Sox10 down vs E11.5 * Ctrl |
| 10590801 | Birc3         | NM_007464    | 0.00286756   | -1.24095 | E11.5 * Sox10 down vs E11.5 * Ctrl |
| 10587792 | Plscr1        | NM_011636    | 0.00688422   | -1.24095 | E11.5 * Sox10 down vs E11.5 * Ctrl |
| 10353844 | Neurl3        | NM_153408    | 0.00257093   | -1.24096 | E11.5 * Sox10 down vs E11.5 * Ctrl |
| 10503584 | Coq3          | NM_172687    | 0.00363619   | -1.24113 | E11.5 * Sox10 down vs E11.5 * Ctrl |
| 10481349 | Ntng2         | NM_133501    | 6.50263e-005 | -1.24113 | E11.5 * Sox10 down vs E11.5 * Ctrl |
| 10569702 | Cacng8        | NM_133190    | 0.00711209   | -1.24129 | E11.5 * Sox10 down vs E11.5 * Ctrl |
| 10398344 | Rtl1          | NM_184109    | 0.00449047   | -1.24153 | E11.5 * Sox10 down vs E11.5 * Ctrl |
| 10524844 | Taok3         | NM_001081308 | 0.00123394   | -1.24181 | E11.5 * Sox10 down vs E11.5 * Ctrl |
| 10596255 | ---           | ---          | 0.00535329   | -1.24199 | E11.5 * Sox10 down vs E11.5 * Ctrl |
| 10412417 | 3110070M22Rik | ENSMUST00000 | 0.000873693  | -1.24217 | E11.5 * Sox10 down vs E11.5 * Ctrl |
| 10495562 | Lrrc39        | NM_175413    | 0.000502557  | -1.24228 | E11.5 * Sox10 down vs E11.5 * Ctrl |
| 10349237 | ---           | ---          | 0.00343783   | -1.24249 | E11.5 * Sox10 down vs E11.5 * Ctrl |
| 10530406 | Gabra2        | NM_008066    | 0.00602521   | -1.2425  | E11.5 * Sox10 down vs E11.5 * Ctrl |
| 10464858 | Bbs1          | NM_001033128 | 0.00505353   | -1.24271 | E11.5 * Sox10 down vs E11.5 * Ctrl |
| 10530421 | Gabra4        | NM_010251    | 0.00888741   | -1.24286 | E11.5 * Sox10 down vs E11.5 * Ctrl |
| 10356248 | C130026L21Rik | NM_175219    | 0.00229367   | -1.24286 | E11.5 * Sox10 down vs E11.5 * Ctrl |
| 10399751 | Colec11       | NM_027866    | 0.00724082   | -1.2429  | E11.5 * Sox10 down vs E11.5 * Ctrl |
| 10582626 | Abcb10        | NM_019552    | 0.00102027   | -1.24319 | E11.5 * Sox10 down vs E11.5 * Ctrl |
| 10466745 | Tjp2          | NM_011597    | 0.00453861   | -1.24321 | E11.5 * Sox10 down vs E11.5 * Ctrl |
| 10578324 | Mtus1         | NM_001005863 | 0.000621836  | -1.24347 | E11.5 * Sox10 down vs E11.5 * Ctrl |
| 10585625 | Sin3a         | NM_011378    | 7.28432e-005 | -1.24373 | E11.5 * Sox10 down vs E11.5 * Ctrl |
| 10590073 | Vill          | NM_011700    | 0.00490213   | -1.244   | E11.5 * Sox10 down vs E11.5 * Ctrl |
| 10565735 | A630091E08Rik | ENSMUST00000 | 0.00643601   | -1.24413 | E11.5 * Sox10 down vs E11.5 * Ctrl |
| 10585535 | Isl2          | NM_027397    | 0.00337828   | -1.24415 | E11.5 * Sox10 down vs E11.5 * Ctrl |
| 10552156 | Rhpn2         | NM_027897    | 0.0099515    | -1.24433 | E11.5 * Sox10 down vs E11.5 * Ctrl |
| 10578904 | Cpe           | NM_013494    | 0.000285165  | -1.24471 | E11.5 * Sox10 down vs E11.5 * Ctrl |
| 10538811 | Prdm5         | NM_027547    | 0.00261517   | -1.24487 | E11.5 * Sox10 down vs E11.5 * Ctrl |
| 10564938 | Fes           | NM_010194    | 2.74899e-005 | -1.24524 | E11.5 * Sox10 down vs E11.5 * Ctrl |
| 10509280 | Hspg2         | NM_008305    | 0.000592003  | -1.24529 | E11.5 * Sox10 down vs E11.5 * Ctrl |
| 10545127 | 4930597O21Rik | ENSMUST00000 | 0.000185451  | -1.24547 | E11.5 * Sox10 down vs E11.5 * Ctrl |
| 10347593 | Speg          | NM_007463    | 0.000871064  | -1.24558 | E11.5 * Sox10 down vs E11.5 * Ctrl |
| 10515819 | ---           | ---          | 0.000783736  | -1.24578 | E11.5 * Sox10 down vs E11.5 * Ctrl |
| 10513884 | Tle1          | NM_011599    | 2.06177e-005 | -1.24592 | E11.5 * Sox10 down vs E11.5 * Ctrl |
| 10549506 | Dennd5b       | NM_177192    | 0.00236799   | -1.24595 | E11.5 * Sox10 down vs E11.5 * Ctrl |
| 10472467 | ---           | ---          | 0.000309708  | -1.246   | E11.5 * Sox10 down vs E11.5 * Ctrl |
| 10473432 | Tnks1bp1      | NM_001081260 | 0.00409401   | -1.24603 | E11.5 * Sox10 down vs E11.5 * Ctrl |
| 10428453 | Csmd3         | NM_001081391 | 0.000707941  | -1.24624 | E11.5 * Sox10 down vs E11.5 * Ctrl |
| 10595171 | E330016A19Rik | BC052196     | 0.00434997   | -1.24664 | E11.5 * Sox10 down vs E11.5 * Ctrl |
| 10362711 | 9030224M15Rik | NM_177793    | 0.00541789   | -1.24667 | E11.5 * Sox10 down vs E11.5 * Ctrl |
| 10532241 | Slc26a1       | NM_174870    | 3.24325e-005 | -1.24699 | E11.5 * Sox10 down vs E11.5 * Ctrl |
| 10436169 | Ift57         | NM_028680    | 0.00680477   | -1.24724 | E11.5 * Sox10 down vs E11.5 * Ctrl |
| 10362536 | ---           | ---          | 0.00013451   | -1.2474  | E11.5 * Sox10 down vs E11.5 * Ctrl |
| 10524331 | C130026L21Rik | ENSMUST00000 | 0.00875915   | -1.24753 | E11.5 * Sox10 down vs E11.5 * Ctrl |
| 10599348 | Gria3         | NM_016886    | 0.00163013   | -1.24768 | E11.5 * Sox10 down vs E11.5 * Ctrl |
| 10577395 | 6820431F20Rik | BC058969     | 0.000718596  | -1.24824 | E11.5 * Sox10 down vs E11.5 * Ctrl |
| 10504094 | Galt          | NM_016658    | 8.56183e-005 | -1.24852 | E11.5 * Sox10 down vs E11.5 * Ctrl |
| 10564704 | Hapln3        | NM_178255    | 0.00953717   | -1.24877 | E11.5 * Sox10 down vs E11.5 * Ctrl |
| 10528177 | ENSMUSG0000C  | NM_198666    | 5.25902e-005 | -1.24879 | E11.5 * Sox10 down vs E11.5 * Ctrl |
| 10415176 | Dhrs4         | NM_030686    | 0.00691697   | -1.24915 | E11.5 * Sox10 down vs E11.5 * Ctrl |
| 10571246 | 5930422O12Rik | ENSMUST00000 | 0.00332398   | -1.24917 | E11.5 * Sox10 down vs E11.5 * Ctrl |
| 10398052 | Serpina3h     | NM_001034870 | 0.000351901  | -1.24917 | E11.5 * Sox10 down vs E11.5 * Ctrl |
| 10368644 | Fam26f        | NM_175449    | 0.00711173   | -1.24931 | E11.5 * Sox10 down vs E11.5 * Ctrl |
| 10458569 | Nr3c1         | NM_008173    | 0.00908861   | -1.24938 | E11.5 * Sox10 down vs E11.5 * Ctrl |
| 10417561 | Fam107a       | NM_183187    | 0.00331013   | -1.24967 | E11.5 * Sox10 down vs E11.5 * Ctrl |
| 10468885 | Zfp826        | ENSMUST00000 | 0.00435801   | -1.24987 | E11.5 * Sox10 down vs E11.5 * Ctrl |

|          |               |              |              |          |                                    |
|----------|---------------|--------------|--------------|----------|------------------------------------|
| 10521626 | Cc2d2a        | NM_172274    | 0.0020862    | -1.2499  | E11.5 * Sox10 down vs E11.5 * Ctrl |
| 10420694 | Ints6         | NM_008715    | 1.26166e-005 | -1.25007 | E11.5 * Sox10 down vs E11.5 * Ctrl |
| 10451372 | Ptk7          | NM_175168    | 8.24709e-005 | -1.2501  | E11.5 * Sox10 down vs E11.5 * Ctrl |
| 10504188 | Ccl19         | NM_011888    | 0.00852045   | -1.25031 | E11.5 * Sox10 down vs E11.5 * Ctrl |
| 10493789 | S100a13       | NM_009113    | 0.000270477  | -1.25039 | E11.5 * Sox10 down vs E11.5 * Ctrl |
| 10559238 | Igf2as        | NR_002855    | 0.00167977   | -1.2504  | E11.5 * Sox10 down vs E11.5 * Ctrl |
| 10427049 | 6030408B16Rik | ENSMUST00000 | 0.00381843   | -1.25085 | E11.5 * Sox10 down vs E11.5 * Ctrl |
| 10512011 | Zfp292        | NM_013889    | 8.49981e-005 | -1.25151 | E11.5 * Sox10 down vs E11.5 * Ctrl |
| 10511755 | Wwp1          | NM_177327    | 0.00389316   | -1.2517  | E11.5 * Sox10 down vs E11.5 * Ctrl |
| 10550509 | Pglyrp1       | NM_009402    | 0.00598905   | -1.25175 | E11.5 * Sox10 down vs E11.5 * Ctrl |
| 10359086 | Cep350        | BC089561     | 0.000845823  | -1.25182 | E11.5 * Sox10 down vs E11.5 * Ctrl |
| 10385870 | Irf1          | NM_008390    | 0.000191827  | -1.25186 | E11.5 * Sox10 down vs E11.5 * Ctrl |
| 10463277 | Nkx2-3        | NM_008699    | 0.00407966   | -1.2519  | E11.5 * Sox10 down vs E11.5 * Ctrl |
| 10444306 | H2-Eb2        | NM_001033978 | 0.00381034   | -1.25191 | E11.5 * Sox10 down vs E11.5 * Ctrl |
| 10475567 | Slc24a5       | NM_175034    | 0.0027937    | -1.25196 | E11.5 * Sox10 down vs E11.5 * Ctrl |
| 10398665 | Tnfrsf2       | NM_009396    | 0.00211397   | -1.25233 | E11.5 * Sox10 down vs E11.5 * Ctrl |
| 10412123 | Ncf2          | NM_010877    | 0.000517196  | -1.2526  | E11.5 * Sox10 down vs E11.5 * Ctrl |
| 10354111 | Aff3          | NM_010678    | 0.00244051   | -1.25271 | E11.5 * Sox10 down vs E11.5 * Ctrl |
| 10373073 | D10Ertd610e   | NM_028027    | 0.000982294  | -1.25272 | E11.5 * Sox10 down vs E11.5 * Ctrl |
| 10598034 | ND2           | ENSMUST00000 | 3.15772e-005 | -1.25274 | E11.5 * Sox10 down vs E11.5 * Ctrl |
| 10548701 | Lrp6          | NM_008514    | 0.00122035   | -1.25275 | E11.5 * Sox10 down vs E11.5 * Ctrl |
| 10555873 | Olfr652       | NM_147048    | 0.0018387    | -1.25288 | E11.5 * Sox10 down vs E11.5 * Ctrl |
| 10534202 | Ncf1          | NM_010876    | 0.0024074    | -1.25289 | E11.5 * Sox10 down vs E11.5 * Ctrl |
| 10536827 | Ccdc136       | BC006583     | 0.000253183  | -1.25295 | E11.5 * Sox10 down vs E11.5 * Ctrl |
| 10537184 | Cald1         | NM_145575    | 0.0022197    | -1.25301 | E11.5 * Sox10 down vs E11.5 * Ctrl |
| 10603440 | Was           | NM_009515    | 0.00203612   | -1.25318 | E11.5 * Sox10 down vs E11.5 * Ctrl |
| 10394852 | EG668698      | ENSMUST00000 | 0.00367896   | -1.25328 | E11.5 * Sox10 down vs E11.5 * Ctrl |
| 10585851 | Hcn4          | NM_001081192 | 0.00138548   | -1.25341 | E11.5 * Sox10 down vs E11.5 * Ctrl |
| 10420631 | Ebpl          | NM_026598    | 0.00374327   | -1.25359 | E11.5 * Sox10 down vs E11.5 * Ctrl |
| 10400649 | Pole2         | NM_011133    | 0.00357634   | -1.25361 | E11.5 * Sox10 down vs E11.5 * Ctrl |
| 10347748 | Acsl3         | NM_028817    | 0.000849706  | -1.25364 | E11.5 * Sox10 down vs E11.5 * Ctrl |
| 10483178 | Cobll1        | NM_177025    | 0.00482817   | -1.25368 | E11.5 * Sox10 down vs E11.5 * Ctrl |
| 10410016 | Fancc         | NM_007985    | 0.000106388  | -1.25374 | E11.5 * Sox10 down vs E11.5 * Ctrl |
| 10361234 | Hsd11b1       | NM_008288    | 0.0022934    | -1.25463 | E11.5 * Sox10 down vs E11.5 * Ctrl |
| 10585874 | Hexa          | NM_010421    | 0.00207661   | -1.25468 | E11.5 * Sox10 down vs E11.5 * Ctrl |
| 10569437 | Phlda2        | NM_009434    | 0.000330351  | -1.25471 | E11.5 * Sox10 down vs E11.5 * Ctrl |
| 10555425 | Fam168a       | BC079886     | 1.58212e-005 | -1.25476 | E11.5 * Sox10 down vs E11.5 * Ctrl |
| 10435832 | Gm608         | NM_001029889 | 5.9302e-005  | -1.25491 | E11.5 * Sox10 down vs E11.5 * Ctrl |
| 10574429 | ---           | ---          | 0.00883743   | -1.25492 | E11.5 * Sox10 down vs E11.5 * Ctrl |
| 10414548 | Rnase6        | NM_030098    | 0.00314632   | -1.25553 | E11.5 * Sox10 down vs E11.5 * Ctrl |
| 10445185 | Pigt          | AB057593     | 0.00427118   | -1.25567 | E11.5 * Sox10 down vs E11.5 * Ctrl |
| 10420889 | 1110020C17Rik | ENSMUST00000 | 0.000829189  | -1.25604 | E11.5 * Sox10 down vs E11.5 * Ctrl |
| 10490169 | Ppp4r1l       | ENSMUST00000 | 0.00194895   | -1.25604 | E11.5 * Sox10 down vs E11.5 * Ctrl |
| 10370210 | Col6a1        | NM_009933    | 0.00156506   | -1.25609 | E11.5 * Sox10 down vs E11.5 * Ctrl |
| 10607183 | Lhfp1         | NM_178358    | 0.00822652   | -1.25614 | E11.5 * Sox10 down vs E11.5 * Ctrl |
| 10367436 | Cd63          | NM_001042580 | 0.00125589   | -1.25673 | E11.5 * Sox10 down vs E11.5 * Ctrl |
| 10395163 | Lamb1-1       | NM_008482    | 1.37635e-005 | -1.25677 | E11.5 * Sox10 down vs E11.5 * Ctrl |
| 10490731 | Sox18         | NM_009236    | 0.00974642   | -1.25681 | E11.5 * Sox10 down vs E11.5 * Ctrl |
| 10489253 | Zhx3          | NM_177263    | 0.00101219   | -1.25702 | E11.5 * Sox10 down vs E11.5 * Ctrl |
| 10344789 | Cspp1         | NM_026493    | 0.00718371   | -1.25715 | E11.5 * Sox10 down vs E11.5 * Ctrl |
| 10518847 | Phf13         | NM_172705    | 1.67448e-005 | -1.25737 | E11.5 * Sox10 down vs E11.5 * Ctrl |
| 10455098 | Pcdhb14       | NM_053139    | 0.00173221   | -1.25738 | E11.5 * Sox10 down vs E11.5 * Ctrl |
| 10416707 | ---           | ---          | 0.00764332   | -1.25744 | E11.5 * Sox10 down vs E11.5 * Ctrl |
| 10431738 | Prickle1      | NM_001033217 | 0.00151485   | -1.25756 | E11.5 * Sox10 down vs E11.5 * Ctrl |
| 10600825 | Zc3h12b       | NM_001034907 | 0.00555927   | -1.25782 | E11.5 * Sox10 down vs E11.5 * Ctrl |
| 10348537 | Ramp1         | NM_016894    | 0.00361605   | -1.25783 | E11.5 * Sox10 down vs E11.5 * Ctrl |
| 10557372 | D430042O09Rik | ENSMUST00000 | 0.00158768   | -1.25788 | E11.5 * Sox10 down vs E11.5 * Ctrl |
| 10485546 | D430041D05Rik | NM_001033347 | 0.00797034   | -1.25817 | E11.5 * Sox10 down vs E11.5 * Ctrl |
| 10550627 | Gpr4          | NM_175668    | 0.00456087   | -1.25823 | E11.5 * Sox10 down vs E11.5 * Ctrl |
| 10412607 | Abhd6         | NM_025341    | 0.00844208   | -1.25838 | E11.5 * Sox10 down vs E11.5 * Ctrl |
| 10507655 | ---           | ---          | 0.000417335  | -1.25875 | E11.5 * Sox10 down vs E11.5 * Ctrl |
| 10579525 | Plvap         | NM_032398    | 0.00890897   | -1.25921 | E11.5 * Sox10 down vs E11.5 * Ctrl |
| 10564343 | Tjp1          | NM_009386    | 1.34937e-006 | -1.25927 | E11.5 * Sox10 down vs E11.5 * Ctrl |
| 10510167 | OTTMUSG00000  | NM_001037926 | 0.00848467   | -1.2595  | E11.5 * Sox10 down vs E11.5 * Ctrl |
| 10414990 | ---           | ---          | 0.00865584   | -1.25954 | E11.5 * Sox10 down vs E11.5 * Ctrl |
| 10474045 | Chst1         | NM_023850    | 0.00310902   | -1.25964 | E11.5 * Sox10 down vs E11.5 * Ctrl |

|          |               |              |              |          |                                    |
|----------|---------------|--------------|--------------|----------|------------------------------------|
| 10375838 | Col23a1       | NM_153393    | 0.00858171   | -1.25979 | E11.5 * Sox10 down vs E11.5 * Ctrl |
| 10390458 | Pcgf2         | NM_009545    | 0.00379474   | -1.25987 | E11.5 * Sox10 down vs E11.5 * Ctrl |
| 10383518 | Hexdc         | NM_001146073 | 0.000803112  | -1.26005 | E11.5 * Sox10 down vs E11.5 * Ctrl |
| 10389070 | ---           | ---          | 0.00265872   | -1.26008 | E11.5 * Sox10 down vs E11.5 * Ctrl |
| 10416522 | Tsc22d1       | NM_207652    | 9.55051e-006 | -1.26025 | E11.5 * Sox10 down vs E11.5 * Ctrl |
| 10511723 | ---           | ---          | 0.00246053   | -1.26033 | E11.5 * Sox10 down vs E11.5 * Ctrl |
| 10411082 | Thbs4         | NM_011582    | 0.00711765   | -1.26051 | E11.5 * Sox10 down vs E11.5 * Ctrl |
| 10442240 | Zfp760        | NM_001008501 | 0.00640393   | -1.26056 | E11.5 * Sox10 down vs E11.5 * Ctrl |
| 10404731 | Tmem14c       | NM_025387    | 0.000557291  | -1.26077 | E11.5 * Sox10 down vs E11.5 * Ctrl |
| 10596166 | 1300017J02Rik | BC021390     | 0.000206197  | -1.26096 | E11.5 * Sox10 down vs E11.5 * Ctrl |
| 10554586 | 4833418N17Rik | AK080712     | 0.00444606   | -1.2611  | E11.5 * Sox10 down vs E11.5 * Ctrl |
| 10413398 | Il17rd        | NM_134437    | 0.00603809   | -1.26139 | E11.5 * Sox10 down vs E11.5 * Ctrl |
| 10353002 | ---           | ---          | 0.0096048    | -1.26175 | E11.5 * Sox10 down vs E11.5 * Ctrl |
| 10360412 | Olfr419       | NM_146715    | 0.00403554   | -1.26182 | E11.5 * Sox10 down vs E11.5 * Ctrl |
| 10554150 | Rgma          | NM_177740    | 0.0010494    | -1.26191 | E11.5 * Sox10 down vs E11.5 * Ctrl |
| 10424439 | Efr3a         | NM_133766    | 0.00503482   | -1.26224 | E11.5 * Sox10 down vs E11.5 * Ctrl |
| 10432640 | Bin2          | ENSMUST00000 | 0.00469041   | -1.26227 | E11.5 * Sox10 down vs E11.5 * Ctrl |
| 10399383 | Kcns3         | NM_173417    | 0.000744664  | -1.26227 | E11.5 * Sox10 down vs E11.5 * Ctrl |
| 10555009 | ---           | ---          | 0.000967578  | -1.26236 | E11.5 * Sox10 down vs E11.5 * Ctrl |
| 10562649 | ---           | ---          | 0.00377587   | -1.26246 | E11.5 * Sox10 down vs E11.5 * Ctrl |
| 10540059 | Slc41a3       | NM_027868    | 0.00287557   | -1.26268 | E11.5 * Sox10 down vs E11.5 * Ctrl |
| 10593799 | Scaper        | NM_001081341 | 0.000430973  | -1.26269 | E11.5 * Sox10 down vs E11.5 * Ctrl |
| 10601771 | Armcx1        | NM_030066    | 0.00172545   | -1.26274 | E11.5 * Sox10 down vs E11.5 * Ctrl |
| 10415806 | Fam124a       | ENSMUST00000 | 0.00292672   | -1.26273 | E11.5 * Sox10 down vs E11.5 * Ctrl |
| 10359648 | Scyl3         | NM_028776    | 1.47435e-005 | -1.2629  | E11.5 * Sox10 down vs E11.5 * Ctrl |
| 10416057 | Clu           | NM_013492    | 0.00711227   | -1.26319 | E11.5 * Sox10 down vs E11.5 * Ctrl |
| 10602180 | Tmem164       | NM_177592    | 0.00687973   | -1.26352 | E11.5 * Sox10 down vs E11.5 * Ctrl |
| 10590799 | C330006D17Rik | ENSMUST00000 | 0.00345479   | -1.26374 | E11.5 * Sox10 down vs E11.5 * Ctrl |
| 10505481 | 8030463A06Rik | ENSMUST00000 | 0.00273309   | -1.26387 | E11.5 * Sox10 down vs E11.5 * Ctrl |
| 10491564 | 4932438A13Rik | NM_172679    | 0.00301927   | -1.26403 | E11.5 * Sox10 down vs E11.5 * Ctrl |
| 10474399 | Bdnf          | NM_001048139 | 2.78092e-005 | -1.2642  | E11.5 * Sox10 down vs E11.5 * Ctrl |
| 10569102 | Irf7          | NM_016850    | 0.0022888    | -1.2648  | E11.5 * Sox10 down vs E11.5 * Ctrl |
| 10373325 | Gpr182        | NM_007412    | 0.00143674   | -1.26485 | E11.5 * Sox10 down vs E11.5 * Ctrl |
| 10561431 | Plekhhg2      | NM_138752    | 0.0083189    | -1.26491 | E11.5 * Sox10 down vs E11.5 * Ctrl |
| 10461402 | Fth1          | NM_010239    | 1.44155e-008 | -1.265   | E11.5 * Sox10 down vs E11.5 * Ctrl |
| 10543600 | Kcp           | NM_001029985 | 0.000282021  | -1.26522 | E11.5 * Sox10 down vs E11.5 * Ctrl |
| 10604032 | ---           | ---          | 0.00325403   | -1.26547 | E11.5 * Sox10 down vs E11.5 * Ctrl |
| 10379044 | Rab34         | NM_033475    | 0.00167946   | -1.26548 | E11.5 * Sox10 down vs E11.5 * Ctrl |
| 10361246 | G0s2          | NM_008059    | 0.00129233   | -1.26554 | E11.5 * Sox10 down vs E11.5 * Ctrl |
| 10606248 | Magee2        | NM_053206    | 0.00555831   | -1.26567 | E11.5 * Sox10 down vs E11.5 * Ctrl |
| 10487645 | Cpxm1         | NM_019696    | 0.0061884    | -1.26595 | E11.5 * Sox10 down vs E11.5 * Ctrl |
| 10357535 | Pfkfb2        | NM_008825    | 0.00438046   | -1.26646 | E11.5 * Sox10 down vs E11.5 * Ctrl |
| 10575160 | Nfat5         | NM_133957    | 6.4381e-005  | -1.26653 | E11.5 * Sox10 down vs E11.5 * Ctrl |
| 10578253 | Sgcx          | NM_145841    | 0.00463274   | -1.26684 | E11.5 * Sox10 down vs E11.5 * Ctrl |
| 10598101 | Maml2         | NM_001013813 | 0.00137843   | -1.26686 | E11.5 * Sox10 down vs E11.5 * Ctrl |
| 10530269 | Rbm47         | NM_178446    | 0.00987276   | -1.26693 | E11.5 * Sox10 down vs E11.5 * Ctrl |
| 10383152 | ---           | ---          | 9.70555e-005 | -1.26711 | E11.5 * Sox10 down vs E11.5 * Ctrl |
| 10519344 | ---           | ---          | 0.0021109    | -1.26711 | E11.5 * Sox10 down vs E11.5 * Ctrl |
| 10401586 | Prox2         | NM_175198    | 0.000514447  | -1.26719 | E11.5 * Sox10 down vs E11.5 * Ctrl |
| 10465314 | Capn1         | NM_007600    | 0.00874136   | -1.2672  | E11.5 * Sox10 down vs E11.5 * Ctrl |
| 10548146 | Tead4         | NM_011567    | 0.000384766  | -1.2674  | E11.5 * Sox10 down vs E11.5 * Ctrl |
| 10507479 | Tmem53        | NM_026837    | 0.00125434   | -1.26753 | E11.5 * Sox10 down vs E11.5 * Ctrl |
| 10543253 | Wnt2          | NM_023653    | 0.0030439    | -1.26778 | E11.5 * Sox10 down vs E11.5 * Ctrl |
| 10425138 | Sh3bp1        | NM_009164    | 4.51838e-005 | -1.26818 | E11.5 * Sox10 down vs E11.5 * Ctrl |
| 10498500 | Vmn2r1        | NM_019918    | 0.00662574   | -1.26823 | E11.5 * Sox10 down vs E11.5 * Ctrl |
| 10384365 | 4930512M02Rik | ENSMUST00000 | 0.00109556   | -1.26845 | E11.5 * Sox10 down vs E11.5 * Ctrl |
| 10414271 | Ptger2        | NM_008964    | 0.00528397   | -1.26857 | E11.5 * Sox10 down vs E11.5 * Ctrl |
| 10606436 | Nsbp1         | NM_016710    | 0.00570252   | -1.26858 | E11.5 * Sox10 down vs E11.5 * Ctrl |
| 10384770 | 5730522E02Rik | ENSMUST00000 | 0.00153063   | -1.26862 | E11.5 * Sox10 down vs E11.5 * Ctrl |
| 10584855 | Scn2b         | NM_001014761 | 0.00111274   | -1.26868 | E11.5 * Sox10 down vs E11.5 * Ctrl |
| 10488060 | Jag1          | NM_013822    | 0.00973343   | -1.2688  | E11.5 * Sox10 down vs E11.5 * Ctrl |
| 10502071 | 5730508B09Rik | NM_027482    | 0.00471133   | -1.26902 | E11.5 * Sox10 down vs E11.5 * Ctrl |
| 10362803 | Cd164         | NM_016898    | 0.000142461  | -1.26903 | E11.5 * Sox10 down vs E11.5 * Ctrl |
| 10357480 | Daf2          | NM_007827    | 0.00130738   | -1.26924 | E11.5 * Sox10 down vs E11.5 * Ctrl |
| 10595768 | Pls1          | NM_001033210 | 0.00217657   | -1.26927 | E11.5 * Sox10 down vs E11.5 * Ctrl |
| 10436830 | Ifnar2        | NM_010509    | 0.00224603   | -1.26943 | E11.5 * Sox10 down vs E11.5 * Ctrl |

|          |               |              |              |          |                                    |
|----------|---------------|--------------|--------------|----------|------------------------------------|
| 10598178 | Disp1         | NM_026866    | 0.000618694  | -1.26982 | E11.5 * Sox10 down vs E11.5 * Ctrl |
| 10574259 | Gpr56         | NM_018882    | 0.000898417  | -1.26984 | E11.5 * Sox10 down vs E11.5 * Ctrl |
| 10481186 | Sardh         | NM_138665    | 0.0013466    | -1.26993 | E11.5 * Sox10 down vs E11.5 * Ctrl |
| 10548367 | Clec1a        | NM_175526    | 0.0015761    | -1.27012 | E11.5 * Sox10 down vs E11.5 * Ctrl |
| 10445640 | Trerf1        | NM_001097623 | 0.00172422   | -1.27014 | E11.5 * Sox10 down vs E11.5 * Ctrl |
| 10545096 | 2410003J06Rik | NM_028025    | 0.000607491  | -1.27033 | E11.5 * Sox10 down vs E11.5 * Ctrl |
| 10351443 | Lmx1a         | NM_033652    | 0.00986065   | -1.27065 | E11.5 * Sox10 down vs E11.5 * Ctrl |
| 10576413 | ---           | ---          | 0.000125448  | -1.27085 | E11.5 * Sox10 down vs E11.5 * Ctrl |
| 10571922 | Nek1          | NM_175089    | 0.00752838   | -1.27088 | E11.5 * Sox10 down vs E11.5 * Ctrl |
| 10544348 | Trpv6         | NM_022413    | 0.000156084  | -1.27098 | E11.5 * Sox10 down vs E11.5 * Ctrl |
| 10471464 | St6galnac6    | NM_016973    | 0.000481514  | -1.27112 | E11.5 * Sox10 down vs E11.5 * Ctrl |
| 10536908 | Tspan33       | NM_146173    | 0.000273445  | -1.27128 | E11.5 * Sox10 down vs E11.5 * Ctrl |
| 10595560 | Tbx18         | NM_023814    | 0.000202117  | -1.27137 | E11.5 * Sox10 down vs E11.5 * Ctrl |
| 10565193 | Hdgfrp3       | NM_013886    | 0.000342465  | -1.27155 | E11.5 * Sox10 down vs E11.5 * Ctrl |
| 10553559 | Siglech       | NM_178706    | 0.00997595   | -1.27174 | E11.5 * Sox10 down vs E11.5 * Ctrl |
| 10455472 | Dcp2          | NM_027490    | 0.000896599  | -1.27192 | E11.5 * Sox10 down vs E11.5 * Ctrl |
| 10411215 | Crhbp         | NM_198408    | 0.0098032    | -1.27208 | E11.5 * Sox10 down vs E11.5 * Ctrl |
| 10462881 | Gpr120        | NM_181748    | 0.0024854    | -1.27209 | E11.5 * Sox10 down vs E11.5 * Ctrl |
| 10554061 | Adamts17      | NM_001033877 | 0.000224276  | -1.27213 | E11.5 * Sox10 down vs E11.5 * Ctrl |
| 10459225 | ---           | ---          | 0.00598944   | -1.27215 | E11.5 * Sox10 down vs E11.5 * Ctrl |
| 10398350 | ---           | ---          | 0.000561075  | -1.2725  | E11.5 * Sox10 down vs E11.5 * Ctrl |
| 10587383 | Cd109         | NM_153098    | 0.000140659  | -1.27263 | E11.5 * Sox10 down vs E11.5 * Ctrl |
| 10382438 | Cd300a        | NM_170758    | 0.00527695   | -1.27314 | E11.5 * Sox10 down vs E11.5 * Ctrl |
| 10474518 | ---           | ---          | 0.00368446   | -1.27316 | E11.5 * Sox10 down vs E11.5 * Ctrl |
| 10475866 | Bcl2l11       | NM_207680    | 0.00126014   | -1.27316 | E11.5 * Sox10 down vs E11.5 * Ctrl |
| 10505627 | LOC100040144  | AK085025     | 0.00341486   | -1.27407 | E11.5 * Sox10 down vs E11.5 * Ctrl |
| 10380398 | Chad          | NM_007689    | 0.000136778  | -1.2741  | E11.5 * Sox10 down vs E11.5 * Ctrl |
| 10606864 | Tceal5        | NM_177919    | 0.00222833   | -1.27411 | E11.5 * Sox10 down vs E11.5 * Ctrl |
| 10526546 | ---           | ---          | 0.00578592   | -1.27426 | E11.5 * Sox10 down vs E11.5 * Ctrl |
| 10473584 | ---           | ---          | 0.00190778   | -1.27432 | E11.5 * Sox10 down vs E11.5 * Ctrl |
| 10363701 | ---           | ---          | 0.00400655   | -1.27437 | E11.5 * Sox10 down vs E11.5 * Ctrl |
| 10440909 | 4932438H23Rik | ENSMUST00000 | 0.00012498   | -1.27449 | E11.5 * Sox10 down vs E11.5 * Ctrl |
| 10372421 | Trhde         | NM_146241    | 0.00350062   | -1.27459 | E11.5 * Sox10 down vs E11.5 * Ctrl |
| 10553042 | Rasip1        | NM_028544    | 0.000941041  | -1.27482 | E11.5 * Sox10 down vs E11.5 * Ctrl |
| 10502284 | Tet2          | NM_001040400 | 0.00108435   | -1.27502 | E11.5 * Sox10 down vs E11.5 * Ctrl |
| 10555235 | Arrb1         | NM_177231    | 0.000111266  | -1.27508 | E11.5 * Sox10 down vs E11.5 * Ctrl |
| 10607124 | Chrdl1        | NM_001114385 | 0.00768976   | -1.27512 | E11.5 * Sox10 down vs E11.5 * Ctrl |
| 10597918 | ---           | ---          | 0.00469141   | -1.27562 | E11.5 * Sox10 down vs E11.5 * Ctrl |
| 10589541 | Kif9          | NM_010628    | 0.000324393  | -1.27566 | E11.5 * Sox10 down vs E11.5 * Ctrl |
| 10464084 | Tcf7l2        | NM_001142918 | 4.02611e-005 | -1.2759  | E11.5 * Sox10 down vs E11.5 * Ctrl |
| 10384579 | Ugp2          | NM_139297    | 0.000965372  | -1.27599 | E11.5 * Sox10 down vs E11.5 * Ctrl |
| 10462130 | Fam122a       | NM_026520    | 0.00317394   | -1.27627 | E11.5 * Sox10 down vs E11.5 * Ctrl |
| 10605370 | Mpp1          | NM_008621    | 0.00402988   | -1.27633 | E11.5 * Sox10 down vs E11.5 * Ctrl |
| 10495987 | EG435755      | DQ851564     | 0.00551766   | -1.27731 | E11.5 * Sox10 down vs E11.5 * Ctrl |
| 10446986 | Crim1         | NM_015800    | 0.00190474   | -1.27758 | E11.5 * Sox10 down vs E11.5 * Ctrl |
| 10538299 | Hoxa3         | NM_010452    | 0.00104862   | -1.27763 | E11.5 * Sox10 down vs E11.5 * Ctrl |
| 10428103 | Stk3          | NM_019635    | 0.00029014   | -1.27768 | E11.5 * Sox10 down vs E11.5 * Ctrl |
| 10535898 | Gnpda1        | NM_011937    | 0.00844402   | -1.27776 | E11.5 * Sox10 down vs E11.5 * Ctrl |
| 10476237 | Hspa12b       | NM_028306    | 0.00384425   | -1.2778  | E11.5 * Sox10 down vs E11.5 * Ctrl |
| 10418848 | Wdfy4         | NM_001146022 | 0.0024224    | -1.27784 | E11.5 * Sox10 down vs E11.5 * Ctrl |
| 10519988 | Al847670      | NM_177869    | 0.00693966   | -1.27788 | E11.5 * Sox10 down vs E11.5 * Ctrl |
| 10590267 | Snora62       | NR_002902    | 0.00169574   | -1.27821 | E11.5 * Sox10 down vs E11.5 * Ctrl |
| 10587558 | Dopey1        | NM_177208    | 0.00381718   | -1.27822 | E11.5 * Sox10 down vs E11.5 * Ctrl |
| 10490854 | OTTMUSG00000  | NM_001037926 | 0.00989499   | -1.27862 | E11.5 * Sox10 down vs E11.5 * Ctrl |
| 10548105 | Ccnd2         | NM_009829    | 0.00110341   | -1.27864 | E11.5 * Sox10 down vs E11.5 * Ctrl |
| 10538590 | Herc5         | ENSMUST00000 | 0.00264783   | -1.27864 | E11.5 * Sox10 down vs E11.5 * Ctrl |
| 10590060 | Ctdspl        | NM_133710    | 0.000129621  | -1.27873 | E11.5 * Sox10 down vs E11.5 * Ctrl |
| 10400057 | Arl4a         | NM_001039515 | 0.000284462  | -1.27893 | E11.5 * Sox10 down vs E11.5 * Ctrl |
| 10508436 | Sync          | NM_023485    | 0.00252354   | -1.27915 | E11.5 * Sox10 down vs E11.5 * Ctrl |
| 10593050 | Il10ra        | NM_008348    | 0.00635454   | -1.27978 | E11.5 * Sox10 down vs E11.5 * Ctrl |
| 10532103 | Glmn          | NM_133248    | 0.0017354    | -1.27997 | E11.5 * Sox10 down vs E11.5 * Ctrl |
| 10494643 | Hmgcs2        | NM_008256    | 0.00545955   | -1.28008 | E11.5 * Sox10 down vs E11.5 * Ctrl |
| 10347697 | Slc4a3        | NM_009208    | 0.00227446   | -1.28024 | E11.5 * Sox10 down vs E11.5 * Ctrl |
| 10506786 | Zcchc11       | NM_175472    | 0.000725383  | -1.28035 | E11.5 * Sox10 down vs E11.5 * Ctrl |
| 10433792 | ---           | ---          | 0.000882362  | -1.28042 | E11.5 * Sox10 down vs E11.5 * Ctrl |
| 10463227 | EG628994      | BC089359     | 0.00354132   | -1.28051 | E11.5 * Sox10 down vs E11.5 * Ctrl |

|          |               |              |              |          |                                    |
|----------|---------------|--------------|--------------|----------|------------------------------------|
| 10377537 | Chd3          | NM_146019    | 8.48618e-007 | -1.2807  | E11.5 * Sox10 down vs E11.5 * Ctrl |
| 10548375 | Clec7a        | NM_020008    | 0.00119928   | -1.28078 | E11.5 * Sox10 down vs E11.5 * Ctrl |
| 10504159 | Ccl19         | NM_011888    | 0.00789349   | -1.28093 | E11.5 * Sox10 down vs E11.5 * Ctrl |
| 10512322 | Ccl19         | NM_011888    | 0.00789349   | -1.28093 | E11.5 * Sox10 down vs E11.5 * Ctrl |
| 10482766 | Rprm          | NM_023396    | 0.00309419   | -1.28112 | E11.5 * Sox10 down vs E11.5 * Ctrl |
| 10437330 | Crebbp        | ENSMUST00000 | 1.86756e-007 | -1.28123 | E11.5 * Sox10 down vs E11.5 * Ctrl |
| 10548661 | ---           | ---          | 0.00500988   | -1.2813  | E11.5 * Sox10 down vs E11.5 * Ctrl |
| 10351509 | Fcgr4         | NM_144559    | 0.00596166   | -1.28133 | E11.5 * Sox10 down vs E11.5 * Ctrl |
| 10458983 | March3        | NM_177115    | 0.00411578   | -1.28182 | E11.5 * Sox10 down vs E11.5 * Ctrl |
| 10559644 | Tmem224       | NM_177887    | 0.00735482   | -1.28235 | E11.5 * Sox10 down vs E11.5 * Ctrl |
| 10537179 | Bpgm          | NM_007563    | 0.00240384   | -1.28257 | E11.5 * Sox10 down vs E11.5 * Ctrl |
| 10580795 | Ccdc102a      | NM_001033533 | 0.00242064   | -1.2831  | E11.5 * Sox10 down vs E11.5 * Ctrl |
| 10531479 | 4932430I15Rik | ENSMUST00000 | 0.000872988  | -1.28345 | E11.5 * Sox10 down vs E11.5 * Ctrl |
| 10384044 | Myl7          | NM_022879    | 0.000131274  | -1.28348 | E11.5 * Sox10 down vs E11.5 * Ctrl |
| 10503148 | ---           | ---          | 0.00506592   | -1.2836  | E11.5 * Sox10 down vs E11.5 * Ctrl |
| 10404152 | Fam65b        | NM_029679    | 0.00901405   | -1.28433 | E11.5 * Sox10 down vs E11.5 * Ctrl |
| 10472970 | Hoxd4         | NM_010469    | 0.00257882   | -1.28447 | E11.5 * Sox10 down vs E11.5 * Ctrl |
| 10544062 | D630045J12Rik | ENSMUST00000 | 7.48151e-005 | -1.28486 | E11.5 * Sox10 down vs E11.5 * Ctrl |
| 10434229 | Cldn5         | NM_013805    | 0.00243843   | -1.28488 | E11.5 * Sox10 down vs E11.5 * Ctrl |
| 10385893 | Slc22a4       | NM_019687    | 0.00129847   | -1.28489 | E11.5 * Sox10 down vs E11.5 * Ctrl |
| 10433717 | ---           | ---          | 0.000382687  | -1.28507 | E11.5 * Sox10 down vs E11.5 * Ctrl |
| 10476880 | A530006G24Rik | XR_034699    | 0.00271013   | -1.28515 | E11.5 * Sox10 down vs E11.5 * Ctrl |
| 10391332 | Ptrf          | NM_008986    | 0.00220125   | -1.28531 | E11.5 * Sox10 down vs E11.5 * Ctrl |
| 10607116 | Ammecr1       | NM_019496    | 0.00224482   | -1.28542 | E11.5 * Sox10 down vs E11.5 * Ctrl |
| 10606026 | Zmym3         | NM_019831    | 0.00138357   | -1.28556 | E11.5 * Sox10 down vs E11.5 * Ctrl |
| 10374083 | Aebp1         | NM_009636    | 0.00411069   | -1.2856  | E11.5 * Sox10 down vs E11.5 * Ctrl |
| 10388545 | Abr           | NM_198895    | 0.00205753   | -1.28582 | E11.5 * Sox10 down vs E11.5 * Ctrl |
| 10598528 | Ssxb9         | NM_199066    | 0.00129631   | -1.28611 | E11.5 * Sox10 down vs E11.5 * Ctrl |
| 10403229 | Itgb8         | NM_177290    | 0.00134316   | -1.28634 | E11.5 * Sox10 down vs E11.5 * Ctrl |
| 10492091 | Smad9         | NM_019483    | 0.00223938   | -1.28637 | E11.5 * Sox10 down vs E11.5 * Ctrl |
| 10344879 | A830018L16Rik | NM_177173    | 0.00234064   | -1.28652 | E11.5 * Sox10 down vs E11.5 * Ctrl |
| 10383196 | ---           | ---          | 0.0102003    | -1.28713 | E11.5 * Sox10 down vs E11.5 * Ctrl |
| 10428089 | Nipal2        | NM_145469    | 0.00619156   | -1.28715 | E11.5 * Sox10 down vs E11.5 * Ctrl |
| 10495933 | 4930422G04Rik | BC079891     | 0.00287978   | -1.28715 | E11.5 * Sox10 down vs E11.5 * Ctrl |
| 10500754 | Sycp1         | NM_011516    | 0.000246467  | -1.28744 | E11.5 * Sox10 down vs E11.5 * Ctrl |
| 10428604 | Tnfrsf11b     | NM_008764    | 0.00224256   | -1.28747 | E11.5 * Sox10 down vs E11.5 * Ctrl |
| 10485622 | Qser1         | NM_001123327 | 0.00268383   | -1.28752 | E11.5 * Sox10 down vs E11.5 * Ctrl |
| 10515385 | Urod          | NM_009478    | 0.00019483   | -1.28774 | E11.5 * Sox10 down vs E11.5 * Ctrl |
| 10539517 | Dysf          | NM_021469    | 6.05535e-005 | -1.28797 | E11.5 * Sox10 down vs E11.5 * Ctrl |
| 10418244 | Fam116a       | NM_001134465 | 0.00724795   | -1.28803 | E11.5 * Sox10 down vs E11.5 * Ctrl |
| 10544417 | Epha1         | NM_023580    | 0.00484584   | -1.28816 | E11.5 * Sox10 down vs E11.5 * Ctrl |
| 10459066 | LOC100044195  | BC150900     | 0.00122408   | -1.28853 | E11.5 * Sox10 down vs E11.5 * Ctrl |
| 10552208 | Nudt19        | NM_033080    | 0.00150753   | -1.28858 | E11.5 * Sox10 down vs E11.5 * Ctrl |
| 10471486 | Eng           | NM_001146350 | 0.00039159   | -1.28869 | E11.5 * Sox10 down vs E11.5 * Ctrl |
| 10416709 | Tdrd3         | NM_172605    | 5.45673e-005 | -1.2891  | E11.5 * Sox10 down vs E11.5 * Ctrl |
| 10377802 | ---           | ---          | 0.000910289  | -1.28922 | E11.5 * Sox10 down vs E11.5 * Ctrl |
| 10399232 | ENSMUSG00000  | ENSMUST00000 | 2.13623e-005 | -1.28941 | E11.5 * Sox10 down vs E11.5 * Ctrl |
| 10586446 | ---           | ---          | 0.00576416   | -1.2896  | E11.5 * Sox10 down vs E11.5 * Ctrl |
| 10364072 | Ggt5          | NM_011820    | 5.75725e-005 | -1.28964 | E11.5 * Sox10 down vs E11.5 * Ctrl |
| 10577963 | Got1l1        | NM_029674    | 0.000655941  | -1.28966 | E11.5 * Sox10 down vs E11.5 * Ctrl |
| 10518335 | OTTMUSG00000  | NM_001083918 | 0.000846501  | -1.28977 | E11.5 * Sox10 down vs E11.5 * Ctrl |
| 10480601 | A830007P12Rik | NM_146115    | 0.00351546   | -1.28987 | E11.5 * Sox10 down vs E11.5 * Ctrl |
| 10584325 | Vsig2         | NM_020518    | 0.0012237    | -1.29005 | E11.5 * Sox10 down vs E11.5 * Ctrl |
| 10379060 | Proca1        | NM_001045516 | 0.000495327  | -1.2902  | E11.5 * Sox10 down vs E11.5 * Ctrl |
| 10472235 | Dapl1         | NM_029723    | 0.00561678   | -1.29042 | E11.5 * Sox10 down vs E11.5 * Ctrl |
| 10569485 | Tnfrsf26      | NM_175649    | 0.00821303   | -1.29059 | E11.5 * Sox10 down vs E11.5 * Ctrl |
| 10546024 | Prokr1        | NM_021381    | 0.00114904   | -1.29078 | E11.5 * Sox10 down vs E11.5 * Ctrl |
| 10443080 | Syngap1       | XM_985548    | 0.00318914   | -1.29082 | E11.5 * Sox10 down vs E11.5 * Ctrl |
| 10512334 | 100038993     | NM_001100596 | 9.2205e-005  | -1.29091 | E11.5 * Sox10 down vs E11.5 * Ctrl |
| 10512356 | 100038993     | NM_001100596 | 9.2205e-005  | -1.29091 | E11.5 * Sox10 down vs E11.5 * Ctrl |
| 10511819 | Klhl32        | NM_001033531 | 0.00214661   | -1.29103 | E11.5 * Sox10 down vs E11.5 * Ctrl |
| 10428449 | ---           | ---          | 0.00405188   | -1.29121 | E11.5 * Sox10 down vs E11.5 * Ctrl |
| 10400971 | Six4          | NM_011382    | 0.00228629   | -1.2914  | E11.5 * Sox10 down vs E11.5 * Ctrl |
| 10592251 | Pknox2        | NM_001029838 | 0.00459675   | -1.29156 | E11.5 * Sox10 down vs E11.5 * Ctrl |
| 10512372 | Ccl19         | NM_011888    | 0.00431362   | -1.29162 | E11.5 * Sox10 down vs E11.5 * Ctrl |
| 10452648 | Emilin2       | NM_145158    | 0.00601719   | -1.29277 | E11.5 * Sox10 down vs E11.5 * Ctrl |

|          |               |              |              |          |                                    |
|----------|---------------|--------------|--------------|----------|------------------------------------|
| 10575844 | Cdh13         | NM_019707    | 0.00813806   | -1.29284 | E11.5 * Sox10 down vs E11.5 * Ctrl |
| 10498371 | P2ry12        | NM_027571    | 0.00404933   | -1.29288 | E11.5 * Sox10 down vs E11.5 * Ctrl |
| 10518069 | Efh2          | NM_025994    | 0.00613752   | -1.29309 | E11.5 * Sox10 down vs E11.5 * Ctrl |
| 10584827 | Mpzi2         | NM_007962    | 0.00794407   | -1.29315 | E11.5 * Sox10 down vs E11.5 * Ctrl |
| 10398388 | ---           | ---          | 0.00341044   | -1.29318 | E11.5 * Sox10 down vs E11.5 * Ctrl |
| 10368356 | Akap7         | NM_018747    | 0.00112458   | -1.29318 | E11.5 * Sox10 down vs E11.5 * Ctrl |
| 10556039 | Olf17         | NM_020598    | 0.00979773   | -1.29344 | E11.5 * Sox10 down vs E11.5 * Ctrl |
| 10463224 | Marveld1      | BC054384     | 0.000435883  | -1.29417 | E11.5 * Sox10 down vs E11.5 * Ctrl |
| 10558088 | ---           | ---          | 0.0011681    | -1.29464 | E11.5 * Sox10 down vs E11.5 * Ctrl |
| 10394858 | ---           | ---          | 0.0050495    | -1.2947  | E11.5 * Sox10 down vs E11.5 * Ctrl |
| 10385500 | Irgm1         | NM_008326    | 0.00274608   | -1.29495 | E11.5 * Sox10 down vs E11.5 * Ctrl |
| 10564624 | St8sia2       | NM_009181    | 0.00369515   | -1.2951  | E11.5 * Sox10 down vs E11.5 * Ctrl |
| 10503654 | ---           | ---          | 0.00381827   | -1.29551 | E11.5 * Sox10 down vs E11.5 * Ctrl |
| 10512384 | BC049635      | NM_177785    | 0.000260463  | -1.29574 | E11.5 * Sox10 down vs E11.5 * Ctrl |
| 10490872 | Lrrcc1        | NM_028915    | 0.00335855   | -1.29575 | E11.5 * Sox10 down vs E11.5 * Ctrl |
| 10504775 | Col15a1       | NM_009928    | 0.00047139   | -1.29575 | E11.5 * Sox10 down vs E11.5 * Ctrl |
| 10483131 | Kcnh7         | NM_133207    | 0.00304262   | -1.29605 | E11.5 * Sox10 down vs E11.5 * Ctrl |
| 10602105 | Col4a5        | NM_007736    | 0.00109684   | -1.29616 | E11.5 * Sox10 down vs E11.5 * Ctrl |
| 10512129 | B4galt1       | NM_022305    | 0.00602599   | -1.2969  | E11.5 * Sox10 down vs E11.5 * Ctrl |
| 10417704 | Lrrc3b        | NM_146052    | 0.00205002   | -1.29695 | E11.5 * Sox10 down vs E11.5 * Ctrl |
| 10559890 | Vmn2r43       | NM_198961    | 0.00128189   | -1.29695 | E11.5 * Sox10 down vs E11.5 * Ctrl |
| 10384154 | Myo1g         | NM_178440    | 0.000787357  | -1.29696 | E11.5 * Sox10 down vs E11.5 * Ctrl |
| 10579776 | Arhgap10      | NM_030113    | 0.000136341  | -1.29733 | E11.5 * Sox10 down vs E11.5 * Ctrl |
| 10359375 | Gpr52         | NM_001146330 | 0.00395881   | -1.29751 | E11.5 * Sox10 down vs E11.5 * Ctrl |
| 10350630 | Fam129a       | NM_022018    | 0.00586582   | -1.29799 | E11.5 * Sox10 down vs E11.5 * Ctrl |
| 10537410 | Tbxas1        | NM_011539    | 0.000346314  | -1.2981  | E11.5 * Sox10 down vs E11.5 * Ctrl |
| 10582868 | Sp110         | NM_175397    | 0.00210674   | -1.29848 | E11.5 * Sox10 down vs E11.5 * Ctrl |
| 10578241 | A730069N07Rik | NM_178735    | 0.000124365  | -1.29864 | E11.5 * Sox10 down vs E11.5 * Ctrl |
| 10478678 | Cd40          | NM_170701    | 0.000172922  | -1.29901 | E11.5 * Sox10 down vs E11.5 * Ctrl |
| 10387797 | Bcl6b         | NM_007528    | 0.00614173   | -1.29928 | E11.5 * Sox10 down vs E11.5 * Ctrl |
| 10474223 | Cd59b         | NM_181858    | 0.00913062   | -1.29938 | E11.5 * Sox10 down vs E11.5 * Ctrl |
| 10555438 | Fchsd2        | NM_199012    | 1.08071e-005 | -1.29954 | E11.5 * Sox10 down vs E11.5 * Ctrl |
| 10522784 | Hmg2          | BC083085     | 0.00444587   | -1.2997  | E11.5 * Sox10 down vs E11.5 * Ctrl |
| 10398240 | Eml1          | NM_001043335 | 0.00115421   | -1.29996 | E11.5 * Sox10 down vs E11.5 * Ctrl |
| 10600921 | Stard8        | NM_199018    | 0.000229366  | -1.30021 | E11.5 * Sox10 down vs E11.5 * Ctrl |
| 10551872 | Al428936      | NM_153577    | 0.00514769   | -1.30029 | E11.5 * Sox10 down vs E11.5 * Ctrl |
| 10453231 | Slc8a1        | NM_011406    | 0.00677336   | -1.30034 | E11.5 * Sox10 down vs E11.5 * Ctrl |
| 10483439 | Lrp2          | NM_001081088 | 9.25998e-005 | -1.30061 | E11.5 * Sox10 down vs E11.5 * Ctrl |
| 10497548 | Fndc3b        | NM_173182    | 0.00355077   | -1.30068 | E11.5 * Sox10 down vs E11.5 * Ctrl |
| 10449731 | U2af1         | NM_024187    | 0.0101938    | -1.30082 | E11.5 * Sox10 down vs E11.5 * Ctrl |
| 10436865 | Ifngr2        | NM_008338    | 0.00847061   | -1.30124 | E11.5 * Sox10 down vs E11.5 * Ctrl |
| 10556426 | Parva         | NM_020606    | 0.00223538   | -1.30128 | E11.5 * Sox10 down vs E11.5 * Ctrl |
| 10398424 | ---           | ---          | 5.16155e-005 | -1.30135 | E11.5 * Sox10 down vs E11.5 * Ctrl |
| 10604735 | Rbm3          | NM_011252    | 0.00116473   | -1.30139 | E11.5 * Sox10 down vs E11.5 * Ctrl |
| 10495927 | ---           | ---          | 0.00743188   | -1.30162 | E11.5 * Sox10 down vs E11.5 * Ctrl |
| 10349051 | Tnfrsf11a     | NM_009399    | 0.0019758    | -1.30184 | E11.5 * Sox10 down vs E11.5 * Ctrl |
| 10484205 | 2610301F02Rik | ENSMUST00000 | 0.00496829   | -1.30215 | E11.5 * Sox10 down vs E11.5 * Ctrl |
| 10408861 | 9530008L14Rik | NM_175417    | 0.00396786   | -1.30226 | E11.5 * Sox10 down vs E11.5 * Ctrl |
| 10583207 | Maml2         | NM_001013813 | 0.0072719    | -1.30305 | E11.5 * Sox10 down vs E11.5 * Ctrl |
| 10512499 | Tpm2          | NM_009416    | 0.000243885  | -1.30334 | E11.5 * Sox10 down vs E11.5 * Ctrl |
| 10541246 | Il17ra        | NM_008359    | 0.00937559   | -1.30338 | E11.5 * Sox10 down vs E11.5 * Ctrl |
| 10453811 | AK220484      | NM_001083628 | 0.00498788   | -1.30338 | E11.5 * Sox10 down vs E11.5 * Ctrl |
| 10361156 | Rcor3         | NM_144814    | 0.00121112   | -1.3034  | E11.5 * Sox10 down vs E11.5 * Ctrl |
| 10456383 | Impa2         | NM_053261    | 7.79223e-005 | -1.30394 | E11.5 * Sox10 down vs E11.5 * Ctrl |
| 10549758 | 4632433K11Rik | NM_029849    | 0.000649274  | -1.30395 | E11.5 * Sox10 down vs E11.5 * Ctrl |
| 10601874 | Tceal3        | NM_001029978 | 0.00123979   | -1.30417 | E11.5 * Sox10 down vs E11.5 * Ctrl |
| 10433403 | A2bp1         | NM_021477    | 0.00236148   | -1.30434 | E11.5 * Sox10 down vs E11.5 * Ctrl |
| 10600786 | Khl15         | NM_001039060 | 0.000297933  | -1.30438 | E11.5 * Sox10 down vs E11.5 * Ctrl |
| 10469828 | Psd4          | NM_177611    | 0.00234498   | -1.30495 | E11.5 * Sox10 down vs E11.5 * Ctrl |
| 10592719 | Oaf           | NM_178644    | 2.01251e-005 | -1.30582 | E11.5 * Sox10 down vs E11.5 * Ctrl |
| 10412830 | Ngly1         | NM_021504    | 0.000638109  | -1.306   | E11.5 * Sox10 down vs E11.5 * Ctrl |
| 10396485 | Syne2         | NM_001005510 | 7.03189e-006 | -1.30602 | E11.5 * Sox10 down vs E11.5 * Ctrl |
| 10350102 | Ptpn7         | NM_177081    | 0.000635633  | -1.30623 | E11.5 * Sox10 down vs E11.5 * Ctrl |
| 10505788 | Acer2         | BC051923     | 0.00705944   | -1.30645 | E11.5 * Sox10 down vs E11.5 * Ctrl |
| 10413434 | D14Abb1e      | NM_001114879 | 0.000721073  | -1.30668 | E11.5 * Sox10 down vs E11.5 * Ctrl |
| 10501051 | Cept1         | NM_133869    | 0.000551675  | -1.30681 | E11.5 * Sox10 down vs E11.5 * Ctrl |

|          |               |              |              |          |                                    |
|----------|---------------|--------------|--------------|----------|------------------------------------|
| 10602625 | lqsec2        | NM_001005475 | 0.000131433  | -1.30758 | E11.5 * Sox10 down vs E11.5 * Ctrl |
| 10430572 | ---           |              | 0.00476517   | -1.30762 | E11.5 * Sox10 down vs E11.5 * Ctrl |
| 10415408 | BC030046      | BC151043     | 0.00400791   | -1.30778 | E11.5 * Sox10 down vs E11.5 * Ctrl |
| 10550795 | Nlrp5         | NM_011860    | 0.00265336   | -1.30802 | E11.5 * Sox10 down vs E11.5 * Ctrl |
| 10579852 | Mmaa          | NM_133823    | 0.000212986  | -1.30837 | E11.5 * Sox10 down vs E11.5 * Ctrl |
| 10434942 | Dlg1          | NM_007862    | 7.22274e-005 | -1.30873 | E11.5 * Sox10 down vs E11.5 * Ctrl |
| 10547396 | Wnt5b         | NM_009525    | 0.00526335   | -1.3088  | E11.5 * Sox10 down vs E11.5 * Ctrl |
| 10527605 | C130038G02Rik | NM_029920    | 0.000240703  | -1.30946 | E11.5 * Sox10 down vs E11.5 * Ctrl |
| 10599296 | Rhox6         | NM_008955    | 0.000523956  | -1.3095  | E11.5 * Sox10 down vs E11.5 * Ctrl |
| 10390186 | Abi3          | NM_025659    | 0.000146632  | -1.30954 | E11.5 * Sox10 down vs E11.5 * Ctrl |
| 10529937 | Kcnp4         | NM_030265    | 0.0049539    | -1.31001 | E11.5 * Sox10 down vs E11.5 * Ctrl |
| 10568765 | Tcerg1l       | NM_183289    | 8.08669e-005 | -1.31007 | E11.5 * Sox10 down vs E11.5 * Ctrl |
| 10410235 | ---           |              | 0.00742612   | -1.31014 | E11.5 * Sox10 down vs E11.5 * Ctrl |
| 10575213 | Zfhx3         | NM_007496    | 0.00137156   | -1.31062 | E11.5 * Sox10 down vs E11.5 * Ctrl |
| 10557960 | Tgfb1i1       | NM_009365    | 0.0022741    | -1.31071 | E11.5 * Sox10 down vs E11.5 * Ctrl |
| 10360235 | Casq1         | NM_009813    | 0.00614599   | -1.31076 | E11.5 * Sox10 down vs E11.5 * Ctrl |
| 10389786 | Hlf           | NM_172563    | 0.000420751  | -1.31113 | E11.5 * Sox10 down vs E11.5 * Ctrl |
| 10523021 | Slc4a4        | NM_018760    | 0.00208306   | -1.31114 | E11.5 * Sox10 down vs E11.5 * Ctrl |
| 10565152 | 9330120H11Rik | ENSMUST00000 | 0.00838615   | -1.31116 | E11.5 * Sox10 down vs E11.5 * Ctrl |
| 10425866 | Parvg         | NM_022321    | 0.00462043   | -1.31144 | E11.5 * Sox10 down vs E11.5 * Ctrl |
| 10586433 | Rbpms2        | NM_028030    | 0.00317264   | -1.31159 | E11.5 * Sox10 down vs E11.5 * Ctrl |
| 10496457 | Adh6b         | ENSMUST00000 | 0.00574434   | -1.31167 | E11.5 * Sox10 down vs E11.5 * Ctrl |
| 10508972 | 434166        | BC080727     | 0.00173862   | -1.31174 | E11.5 * Sox10 down vs E11.5 * Ctrl |
| 10560618 | Apoc1         | NM_007469    | 0.00512395   | -1.31207 | E11.5 * Sox10 down vs E11.5 * Ctrl |
| 10589884 | Bcl2a1c       | NM_007535    | 0.000871305  | -1.31209 | E11.5 * Sox10 down vs E11.5 * Ctrl |
| 10513381 | Rod1          | NM_144904    | 4.53062e-007 | -1.31219 | E11.5 * Sox10 down vs E11.5 * Ctrl |
| 10426284 | Acr           | NM_013455    | 0.000354012  | -1.31256 | E11.5 * Sox10 down vs E11.5 * Ctrl |
| 10455118 | Pcdh18        | NM_053143    | 0.00546525   | -1.31296 | E11.5 * Sox10 down vs E11.5 * Ctrl |
| 10433797 | Prkdc         | NM_011159    | 0.000131474  | -1.31304 | E11.5 * Sox10 down vs E11.5 * Ctrl |
| 10487987 | Lrn4          | NM_177303    | 0.00153679   | -1.31345 | E11.5 * Sox10 down vs E11.5 * Ctrl |
| 10488090 | Tasp1         | NM_175225    | 0.00028856   | -1.3139  | E11.5 * Sox10 down vs E11.5 * Ctrl |
| 10420362 | Gjb2          | NM_008125    | 0.00199984   | -1.31395 | E11.5 * Sox10 down vs E11.5 * Ctrl |
| 10413100 | Myst4         | NM_017479    | 1.17342e-005 | -1.31398 | E11.5 * Sox10 down vs E11.5 * Ctrl |
| 10555832 | Olfr632       | NM_147119    | 0.00564886   | -1.314   | E11.5 * Sox10 down vs E11.5 * Ctrl |
| 10476941 | ---           |              | 0.0102063    | -1.3141  | E11.5 * Sox10 down vs E11.5 * Ctrl |
| 10376513 | Nlrp3         | NM_145827    | 0.00552924   | -1.3141  | E11.5 * Sox10 down vs E11.5 * Ctrl |
| 10576973 | Col4a1        | NM_009931    | 5.20365e-006 | -1.31471 | E11.5 * Sox10 down vs E11.5 * Ctrl |
| 10356968 | Pam           | NM_013626    | 0.00147668   | -1.31479 | E11.5 * Sox10 down vs E11.5 * Ctrl |
| 10510230 | OTTMUSG00000  | NM_001039209 | 0.000636543  | -1.31492 | E11.5 * Sox10 down vs E11.5 * Ctrl |
| 10419744 | Slc7a7        | NM_011405    | 0.00736614   | -1.31495 | E11.5 * Sox10 down vs E11.5 * Ctrl |
| 10579347 | Ifi30         | NM_023065    | 0.00239324   | -1.31513 | E11.5 * Sox10 down vs E11.5 * Ctrl |
| 10504905 | E130309F12Rik | NM_178756    | 0.00268858   | -1.31565 | E11.5 * Sox10 down vs E11.5 * Ctrl |
| 10601412 | Lpar4         | NM_175271    | 4.67554e-005 | -1.31567 | E11.5 * Sox10 down vs E11.5 * Ctrl |
| 10346348 | 2810022L02Rik | NM_144882    | 0.000822012  | -1.31588 | E11.5 * Sox10 down vs E11.5 * Ctrl |
| 10566264 | EG436003      | NM_001127686 | 0.000398157  | -1.31592 | E11.5 * Sox10 down vs E11.5 * Ctrl |
| 10445071 | Zfp57         | NM_001013745 | 6.93055e-005 | -1.31615 | E11.5 * Sox10 down vs E11.5 * Ctrl |
| 10541910 | Vwf           | NM_011708    | 0.000250405  | -1.31665 | E11.5 * Sox10 down vs E11.5 * Ctrl |
| 10380699 | Copz2         | NM_019877    | 0.00208685   | -1.31685 | E11.5 * Sox10 down vs E11.5 * Ctrl |
| 10515242 | Nsun4         | NM_028142    | 0.00269242   | -1.31694 | E11.5 * Sox10 down vs E11.5 * Ctrl |
| 10364529 | Prtn3         | NM_011178    | 0.00716534   | -1.31699 | E11.5 * Sox10 down vs E11.5 * Ctrl |
| 10344725 | Adhfe1        | NM_175236    | 8.37942e-005 | -1.31727 | E11.5 * Sox10 down vs E11.5 * Ctrl |
| 10350077 | Syt2          | NM_009307    | 0.000647379  | -1.31748 | E11.5 * Sox10 down vs E11.5 * Ctrl |
| 10532711 | Cmklr1        | NM_008153    | 0.000932644  | -1.31769 | E11.5 * Sox10 down vs E11.5 * Ctrl |
| 10544779 | Hoxa7         | NM_010455    | 7.48469e-005 | -1.31783 | E11.5 * Sox10 down vs E11.5 * Ctrl |
| 10395277 | Sypl          | NM_013635    | 5.42922e-005 | -1.31821 | E11.5 * Sox10 down vs E11.5 * Ctrl |
| 10344707 | Pcmt1         | NM_183028    | 6.70376e-005 | -1.31822 | E11.5 * Sox10 down vs E11.5 * Ctrl |
| 10414805 | Trav13d-4     | ENSMUST00000 | 0.00874003   | -1.31828 | E11.5 * Sox10 down vs E11.5 * Ctrl |
| 10533034 | Ccdc60        | NM_177759    | 0.00308108   | -1.3183  | E11.5 * Sox10 down vs E11.5 * Ctrl |
| 10480891 | Ubac1         | NM_133835    | 0.000474068  | -1.31852 | E11.5 * Sox10 down vs E11.5 * Ctrl |
| 10560139 | B430211C08Rik | NM_001039146 | 5.57068e-005 | -1.31863 | E11.5 * Sox10 down vs E11.5 * Ctrl |
| 10436802 | ---           |              | 0.00919239   | -1.3194  | E11.5 * Sox10 down vs E11.5 * Ctrl |
| 10544638 | Tra2a         | AB052758     | 0.00889697   | -1.31949 | E11.5 * Sox10 down vs E11.5 * Ctrl |
| 10602925 | Phka2         | NM_172783    | 0.000550123  | -1.31965 | E11.5 * Sox10 down vs E11.5 * Ctrl |
| 10445753 | Trem3         | NM_021407    | 0.0012052    | -1.31981 | E11.5 * Sox10 down vs E11.5 * Ctrl |
| 10548905 | Eps8          | NM_007945    | 0.000155511  | -1.3199  | E11.5 * Sox10 down vs E11.5 * Ctrl |
| 10477069 | Tcf15         | NM_009328    | 0.00199965   | -1.31997 | E11.5 * Sox10 down vs E11.5 * Ctrl |

|          |               |              |              |          |                                    |
|----------|---------------|--------------|--------------|----------|------------------------------------|
| 10582303 | Cyba          | NM_007806    | 0.0047028    | -1.32    | E11.5 * Sox10 down vs E11.5 * Ctrl |
| 10498992 | Tlr2          | NM_011905    | 0.00317295   | -1.32002 | E11.5 * Sox10 down vs E11.5 * Ctrl |
| 10447799 | Igf2r         | NM_010515    | 3.81544e-006 | -1.32005 | E11.5 * Sox10 down vs E11.5 * Ctrl |
| 10584057 | Zbtb44        | NM_001115130 | 0.00104566   | -1.32036 | E11.5 * Sox10 down vs E11.5 * Ctrl |
| 10531181 | Adamts3       | NM_001081401 | 0.00836887   | -1.32036 | E11.5 * Sox10 down vs E11.5 * Ctrl |
| 10546803 | Itpr1         | NM_010585    | 0.00284667   | -1.3209  | E11.5 * Sox10 down vs E11.5 * Ctrl |
| 10539773 | Gfpt1         | NM_013528    | 0.000898144  | -1.32092 | E11.5 * Sox10 down vs E11.5 * Ctrl |
| 10409202 | ---           | ---          | 0.000227987  | -1.32092 | E11.5 * Sox10 down vs E11.5 * Ctrl |
| 10378523 | Smg6          | NM_001002764 | 0.00055473   | -1.32109 | E11.5 * Sox10 down vs E11.5 * Ctrl |
| 10356278 | Sp110         | NM_175397    | 0.000255818  | -1.32127 | E11.5 * Sox10 down vs E11.5 * Ctrl |
| 10595480 | Me1           | NM_008615    | 0.0034217    | -1.32135 | E11.5 * Sox10 down vs E11.5 * Ctrl |
| 10573939 | Lpcat2        | NM_173014    | 0.00200055   | -1.32154 | E11.5 * Sox10 down vs E11.5 * Ctrl |
| 10361381 | Syne1         | NM_001079686 | 1.07249e-005 | -1.32183 | E11.5 * Sox10 down vs E11.5 * Ctrl |
| 10560655 | Bcam          | NM_020486    | 0.000677745  | -1.32189 | E11.5 * Sox10 down vs E11.5 * Ctrl |
| 10580191 | Nfix          | NM_001081981 | 0.000451941  | -1.32227 | E11.5 * Sox10 down vs E11.5 * Ctrl |
| 10369264 | Oit3          | NM_010959    | 7.24088e-005 | -1.32286 | E11.5 * Sox10 down vs E11.5 * Ctrl |
| 10591112 | Fat3          | NM_001080814 | 7.70909e-005 | -1.32291 | E11.5 * Sox10 down vs E11.5 * Ctrl |
| 10357043 | Bcl2          | NM_009741    | 2.01931e-005 | -1.32294 | E11.5 * Sox10 down vs E11.5 * Ctrl |
| 10568174 | Spn           | NM_009259    | 2.10617e-005 | -1.32309 | E11.5 * Sox10 down vs E11.5 * Ctrl |
| 10566583 | EG668139      | AK172683     | 0.00370376   | -1.32332 | E11.5 * Sox10 down vs E11.5 * Ctrl |
| 10492699 | Ctso          | NM_177662    | 0.000329514  | -1.32356 | E11.5 * Sox10 down vs E11.5 * Ctrl |
| 10390103 | Pdk2          | NM_133667    | 0.000918098  | -1.32366 | E11.5 * Sox10 down vs E11.5 * Ctrl |
| 10542221 | ---           | ---          | 0.000782989  | -1.32371 | E11.5 * Sox10 down vs E11.5 * Ctrl |
| 10530393 | Gabrg1        | NM_010252    | 0.0008178    | -1.32416 | E11.5 * Sox10 down vs E11.5 * Ctrl |
| 10410164 | Cntnap3       | NM_001081129 | 0.000290568  | -1.32457 | E11.5 * Sox10 down vs E11.5 * Ctrl |
| 10436550 | ---           | ---          | 0.00670564   | -1.32465 | E11.5 * Sox10 down vs E11.5 * Ctrl |
| 10491617 | 4932438A13Rik | NM_172679    | 0.00287929   | -1.32481 | E11.5 * Sox10 down vs E11.5 * Ctrl |
| 10404359 | Mboat1        | NM_153546    | 0.00126277   | -1.325   | E11.5 * Sox10 down vs E11.5 * Ctrl |
| 10578025 | ---           | ---          | 0.000806715  | -1.32529 | E11.5 * Sox10 down vs E11.5 * Ctrl |
| 10414590 | Ear6          | NM_053111    | 0.00302979   | -1.32555 | E11.5 * Sox10 down vs E11.5 * Ctrl |
| 10500570 | Hao3          | NM_019545    | 0.000283923  | -1.32603 | E11.5 * Sox10 down vs E11.5 * Ctrl |
| 10573747 | Adcy7         | NM_007406    | 0.00274934   | -1.32621 | E11.5 * Sox10 down vs E11.5 * Ctrl |
| 10594661 | Tpm1          | NM_024427    | 0.000136984  | -1.32646 | E11.5 * Sox10 down vs E11.5 * Ctrl |
| 10466963 | 9930021J03Rik | NM_172836    | 0.00191702   | -1.32649 | E11.5 * Sox10 down vs E11.5 * Ctrl |
| 10348244 | Inpp5d        | NM_010566    | 0.00113503   | -1.32659 | E11.5 * Sox10 down vs E11.5 * Ctrl |
| 10512067 | Ddx58         | NM_172689    | 7.32515e-005 | -1.32686 | E11.5 * Sox10 down vs E11.5 * Ctrl |
| 10559200 | Tnni2         | NM_009405    | 0.000178807  | -1.32736 | E11.5 * Sox10 down vs E11.5 * Ctrl |
| 10607283 | Maged2        | NM_030700    | 0.00326342   | -1.32781 | E11.5 * Sox10 down vs E11.5 * Ctrl |
| 10457407 | ---           | ---          | 7.35278e-006 | -1.32805 | E11.5 * Sox10 down vs E11.5 * Ctrl |
| 10558596 | Paox          | NM_153783    | 0.00080716   | -1.32854 | E11.5 * Sox10 down vs E11.5 * Ctrl |
| 10375886 | D930048N14Rik | BC095931     | 4.19401e-005 | -1.32855 | E11.5 * Sox10 down vs E11.5 * Ctrl |
| 10511588 | Tmem67        | NM_177861    | 0.00249567   | -1.32916 | E11.5 * Sox10 down vs E11.5 * Ctrl |
| 10553354 | Nav2          | NM_175272    | 0.000116914  | -1.32949 | E11.5 * Sox10 down vs E11.5 * Ctrl |
| 10455961 | Ilgp1         | NM_001146275 | 0.000424555  | -1.32964 | E11.5 * Sox10 down vs E11.5 * Ctrl |
| 10433114 | Itga5         | NM_010577    | 0.00932068   | -1.32996 | E11.5 * Sox10 down vs E11.5 * Ctrl |
| 10497862 | Trpc3         | NM_019510    | 0.00100702   | -1.33006 | E11.5 * Sox10 down vs E11.5 * Ctrl |
| 10407416 | Calml3        | NM_027416    | 0.00500951   | -1.33018 | E11.5 * Sox10 down vs E11.5 * Ctrl |
| 10584762 | Bcl9l         | NM_030256    | 0.000354653  | -1.33027 | E11.5 * Sox10 down vs E11.5 * Ctrl |
| 10382228 | Axin2         | NM_015732    | 1.60458e-005 | -1.33046 | E11.5 * Sox10 down vs E11.5 * Ctrl |
| 10403727 | Gli3          | NM_008130    | 0.00101662   | -1.33091 | E11.5 * Sox10 down vs E11.5 * Ctrl |
| 10540408 | Itpr1         | NM_010585    | 0.000122824  | -1.33167 | E11.5 * Sox10 down vs E11.5 * Ctrl |
| 10604333 | Wdr40b        | NM_178739    | 0.00101762   | -1.33186 | E11.5 * Sox10 down vs E11.5 * Ctrl |
| 10467871 | Dnmbp         | NM_028029    | 0.00560006   | -1.33263 | E11.5 * Sox10 down vs E11.5 * Ctrl |
| 10578681 | ---           | ---          | 0.00022434   | -1.33345 | E11.5 * Sox10 down vs E11.5 * Ctrl |
| 10362432 | Trdn          | NM_029726    | 0.00183143   | -1.33347 | E11.5 * Sox10 down vs E11.5 * Ctrl |
| 10422348 | Ugcgl2        | NM_001081252 | 0.00239746   | -1.33362 | E11.5 * Sox10 down vs E11.5 * Ctrl |
| 10519555 | Abcb1b        | NM_011075    | 0.00909313   | -1.3337  | E11.5 * Sox10 down vs E11.5 * Ctrl |
| 10472514 | Nostrin       | NM_181547    | 0.00516437   | -1.33407 | E11.5 * Sox10 down vs E11.5 * Ctrl |
| 10476924 | Cst9          | NM_009979    | 0.000590042  | -1.33442 | E11.5 * Sox10 down vs E11.5 * Ctrl |
| 10351482 | 1700015E13Rik | BC099563     | 0.000366113  | -1.33457 | E11.5 * Sox10 down vs E11.5 * Ctrl |
| 10514000 | Mpdz          | NM_010820    | 1.47151e-005 | -1.33499 | E11.5 * Sox10 down vs E11.5 * Ctrl |
| 10568714 | Mki67         | NM_001081117 | 1.63083e-005 | -1.33558 | E11.5 * Sox10 down vs E11.5 * Ctrl |
| 10538848 | OTTMUSG00000  | XR_032708    | 0.00154699   | -1.33571 | E11.5 * Sox10 down vs E11.5 * Ctrl |
| 10495763 | Gclm          | NM_008129    | 0.00864269   | -1.33578 | E11.5 * Sox10 down vs E11.5 * Ctrl |
| 10433658 | ---           | ---          | 0.000580377  | -1.33611 | E11.5 * Sox10 down vs E11.5 * Ctrl |
| 10394829 | ---           | ---          | 0.000131601  | -1.33661 | E11.5 * Sox10 down vs E11.5 * Ctrl |

|          |               |              |              |          |                                    |
|----------|---------------|--------------|--------------|----------|------------------------------------|
| 10594103 | 2410076I21Rik | ENSMUST00000 | 0.000238454  | -1.33666 | E11.5 * Sox10 down vs E11.5 * Ctrl |
| 10594969 | Unc13c        | NM_001081153 | 3.64888e-005 | -1.33669 | E11.5 * Sox10 down vs E11.5 * Ctrl |
| 10490384 | Lama5         | NM_001081171 | 5.12292e-005 | -1.33703 | E11.5 * Sox10 down vs E11.5 * Ctrl |
| 10525932 | Tmem132c      | NM_175432    | 0.00016894   | -1.33713 | E11.5 * Sox10 down vs E11.5 * Ctrl |
| 10433639 | Mkl2          | NM_153588    | 2.62733e-006 | -1.33736 | E11.5 * Sox10 down vs E11.5 * Ctrl |
| 10357003 | Rnf152        | NM_178779    | 0.00863029   | -1.33745 | E11.5 * Sox10 down vs E11.5 * Ctrl |
| 10592535 | Sorl1         | NM_011436    | 2.36153e-005 | -1.33758 | E11.5 * Sox10 down vs E11.5 * Ctrl |
| 10560329 | Hif3a         | NM_016868    | 0.000398069  | -1.33776 | E11.5 * Sox10 down vs E11.5 * Ctrl |
| 10365420 | Al597468      | NM_001013028 | 9.64985e-006 | -1.33788 | E11.5 * Sox10 down vs E11.5 * Ctrl |
| 10596465 | Acy1          | NM_025371    | 1.174e-005   | -1.33788 | E11.5 * Sox10 down vs E11.5 * Ctrl |
| 10570639 | 6820431F20Rik | BC025151     | 0.000858652  | -1.33789 | E11.5 * Sox10 down vs E11.5 * Ctrl |
| 10507484 | Eri3          | NM_080469    | 0.00322362   | -1.33813 | E11.5 * Sox10 down vs E11.5 * Ctrl |
| 10586110 | Cln6          | NM_001033175 | 3.88873e-005 | -1.33854 | E11.5 * Sox10 down vs E11.5 * Ctrl |
| 10587023 | Rab27a        | NM_023635    | 2.03126e-005 | -1.33867 | E11.5 * Sox10 down vs E11.5 * Ctrl |
| 10390117 | Itga3         | NM_013565    | 0.00106655   | -1.33947 | E11.5 * Sox10 down vs E11.5 * Ctrl |
| 10600093 | Zfp185        | NM_009549    | 7.88981e-005 | -1.33948 | E11.5 * Sox10 down vs E11.5 * Ctrl |
| 10514421 | Lrrc19        | NM_175305    | 0.00760706   | -1.33998 | E11.5 * Sox10 down vs E11.5 * Ctrl |
| 10563872 | Gabra5        | NM_176942    | 0.00929606   | -1.34061 | E11.5 * Sox10 down vs E11.5 * Ctrl |
| 10552469 | Klk13         | NM_001039042 | 1.41207e-005 | -1.34083 | E11.5 * Sox10 down vs E11.5 * Ctrl |
| 10605392 | F8            | NM_007977    | 0.00273614   | -1.34093 | E11.5 * Sox10 down vs E11.5 * Ctrl |
| 10607189 | Amot          | NM_153319    | 0.00357113   | -1.34105 | E11.5 * Sox10 down vs E11.5 * Ctrl |
| 10375578 | Flt4          | NM_008029    | 0.000799149  | -1.34115 | E11.5 * Sox10 down vs E11.5 * Ctrl |
| 10557009 | Eef2k         | NM_007908    | 1.23981e-005 | -1.34139 | E11.5 * Sox10 down vs E11.5 * Ctrl |
| 10382200 | Ccdc46        | NM_029606    | 8.25853e-005 | -1.34185 | E11.5 * Sox10 down vs E11.5 * Ctrl |
| 10448124 | Fpr1          | NM_013521    | 0.00166583   | -1.34224 | E11.5 * Sox10 down vs E11.5 * Ctrl |
| 10416689 | Olfm4         | NM_001030294 | 0.00775404   | -1.34254 | E11.5 * Sox10 down vs E11.5 * Ctrl |
| 10596428 | 1110001D15Rik | NM_026763    | 0.00287638   | -1.34256 | E11.5 * Sox10 down vs E11.5 * Ctrl |
| 10363090 | Rfx6          | NM_001159389 | 0.000752198  | -1.34278 | E11.5 * Sox10 down vs E11.5 * Ctrl |
| 10548899 | Rerg          | NM_181988    | 0.00431052   | -1.3428  | E11.5 * Sox10 down vs E11.5 * Ctrl |
| 10410115 | 1110018J18Rik | NM_025370    | 0.00344907   | -1.34287 | E11.5 * Sox10 down vs E11.5 * Ctrl |
| 10591094 | Fat3          | NM_001080814 | 0.000760221  | -1.34292 | E11.5 * Sox10 down vs E11.5 * Ctrl |
| 10568355 | Pycard        | NM_023258    | 0.00405528   | -1.34302 | E11.5 * Sox10 down vs E11.5 * Ctrl |
| 10556244 | Ipo7          | AF357383     | 0.00267989   | -1.34385 | E11.5 * Sox10 down vs E11.5 * Ctrl |
| 10387368 | Tmem88        | NM_025915    | 0.000263974  | -1.34447 | E11.5 * Sox10 down vs E11.5 * Ctrl |
| 10474381 | Kif18a        | NM_139303    | 0.000697022  | -1.34458 | E11.5 * Sox10 down vs E11.5 * Ctrl |
| 10526098 | Scand3        | NM_183088    | 0.00135743   | -1.34475 | E11.5 * Sox10 down vs E11.5 * Ctrl |
| 10346695 | Nbeal1        | NM_173444    | 9.62558e-006 | -1.3448  | E11.5 * Sox10 down vs E11.5 * Ctrl |
| 10409629 | Kihl3         | ENSMUST00000 | 0.000870883  | -1.34502 | E11.5 * Sox10 down vs E11.5 * Ctrl |
| 10607169 | Trpc5         | NM_009428    | 0.00152535   | -1.3453  | E11.5 * Sox10 down vs E11.5 * Ctrl |
| 10432178 | Snora2b       | AF357413     | 0.00364589   | -1.34536 | E11.5 * Sox10 down vs E11.5 * Ctrl |
| 10383214 | Rnf213        | AK173199     | 0.000115982  | -1.34555 | E11.5 * Sox10 down vs E11.5 * Ctrl |
| 10562729 | ---           | ---          | 2.53548e-005 | -1.34596 | E11.5 * Sox10 down vs E11.5 * Ctrl |
| 10346107 | Dnahc7b       | ENSMUST00000 | 0.00294282   | -1.34637 | E11.5 * Sox10 down vs E11.5 * Ctrl |
| 10500434 | Bcl9          | NM_029933    | 5.29593e-005 | -1.34677 | E11.5 * Sox10 down vs E11.5 * Ctrl |
| 10454632 | Camk4         | NM_009793    | 0.00575434   | -1.34812 | E11.5 * Sox10 down vs E11.5 * Ctrl |
| 10472042 | OTTMUSG00000  | AF390105     | 0.000503633  | -1.34815 | E11.5 * Sox10 down vs E11.5 * Ctrl |
| 10534889 | Agfg2         | NM_178162    | 1.8583e-006  | -1.34911 | E11.5 * Sox10 down vs E11.5 * Ctrl |
| 10598538 | Ssxb1         | NM_026492    | 0.00126153   | -1.34921 | E11.5 * Sox10 down vs E11.5 * Ctrl |
| 10355871 | Obsl1         | NM_178884    | 0.000572525  | -1.35023 | E11.5 * Sox10 down vs E11.5 * Ctrl |
| 10476945 | Cst7          | NM_009977    | 0.00190775   | -1.35048 | E11.5 * Sox10 down vs E11.5 * Ctrl |
| 10559221 | Tnnt3         | NM_011620    | 0.00373511   | -1.35063 | E11.5 * Sox10 down vs E11.5 * Ctrl |
| 10604932 | Cd99l2        | NM_138309    | 0.00377029   | -1.35136 | E11.5 * Sox10 down vs E11.5 * Ctrl |
| 10461384 | ---           | ---          | 0.0046573    | -1.35138 | E11.5 * Sox10 down vs E11.5 * Ctrl |
| 10583163 | Trpc6         | NM_013838    | 0.000347397  | -1.35145 | E11.5 * Sox10 down vs E11.5 * Ctrl |
| 10357008 | Pign          | NM_013784    | 6.07822e-006 | -1.35208 | E11.5 * Sox10 down vs E11.5 * Ctrl |
| 10424252 | Wdyh1         | NM_029734    | 0.00380816   | -1.35208 | E11.5 * Sox10 down vs E11.5 * Ctrl |
| 10394805 | 5730507C01Rik | ENSMUST00000 | 0.000339854  | -1.35242 | E11.5 * Sox10 down vs E11.5 * Ctrl |
| 10549530 | ---           | ---          | 0.00794279   | -1.35254 | E11.5 * Sox10 down vs E11.5 * Ctrl |
| 10485213 | Cd82          | NM_007656    | 0.000626031  | -1.35283 | E11.5 * Sox10 down vs E11.5 * Ctrl |
| 10453629 | 9430020K01Rik | NM_001081963 | 0.000407543  | -1.35292 | E11.5 * Sox10 down vs E11.5 * Ctrl |
| 10531994 | Mpa2l         | NM_194336    | 0.000110406  | -1.35295 | E11.5 * Sox10 down vs E11.5 * Ctrl |
| 10548875 | Art4          | NM_026639    | 8.9726e-005  | -1.3534  | E11.5 * Sox10 down vs E11.5 * Ctrl |
| 10554800 | Rab38         | NM_028238    | 2.31759e-006 | -1.35349 | E11.5 * Sox10 down vs E11.5 * Ctrl |
| 10363082 | Lilrb4        | NM_013532    | 0.000385779  | -1.35362 | E11.5 * Sox10 down vs E11.5 * Ctrl |
| 10429402 | Gpr20         | NM_173365    | 0.000447861  | -1.35377 | E11.5 * Sox10 down vs E11.5 * Ctrl |
| 10502785 | ENSMUSG00000  | ENSMUST00000 | 0.00492245   | -1.35386 | E11.5 * Sox10 down vs E11.5 * Ctrl |

|          |               |              |              |          |                                    |
|----------|---------------|--------------|--------------|----------|------------------------------------|
| 10557229 | LOC100134980  | BC016578     | 0.00016809   | -1.3539  | E11.5 * Sox10 down vs E11.5 * Ctrl |
| 10388902 | Lgals9        | NM_010708    | 0.000642762  | -1.35396 | E11.5 * Sox10 down vs E11.5 * Ctrl |
| 10360090 | Ppox          | NM_008911    | 0.000232626  | -1.35408 | E11.5 * Sox10 down vs E11.5 * Ctrl |
| 10504849 | Stx17         | NM_026343    | 0.00165144   | -1.35416 | E11.5 * Sox10 down vs E11.5 * Ctrl |
| 10399965 | F730043M19Rik | ENSMUST00000 | 0.00366653   | -1.35419 | E11.5 * Sox10 down vs E11.5 * Ctrl |
| 10346722 | Nbeal1        | NM_173444    | 0.000445082  | -1.35465 | E11.5 * Sox10 down vs E11.5 * Ctrl |
| 10497731 | Ccdc39        | NM_026222    | 0.000987262  | -1.35479 | E11.5 * Sox10 down vs E11.5 * Ctrl |
| 10474048 | Syt13         | NM_030725    | 1.63147e-006 | -1.35511 | E11.5 * Sox10 down vs E11.5 * Ctrl |
| 10530592 | Fryl          | NM_177136    | 0.000289825  | -1.35578 | E11.5 * Sox10 down vs E11.5 * Ctrl |
| 10461408 | Rab3il1       | NM_144538    | 0.000109923  | -1.35615 | E11.5 * Sox10 down vs E11.5 * Ctrl |
| 10398332 | ---           | ---          | 1.32749e-005 | -1.35625 | E11.5 * Sox10 down vs E11.5 * Ctrl |
| 10396606 | Syne2         | NM_001005510 | 0.00208849   | -1.35628 | E11.5 * Sox10 down vs E11.5 * Ctrl |
| 10512022 | Mobkl2b       | ENSMUST00000 | 0.0100811    | -1.35628 | E11.5 * Sox10 down vs E11.5 * Ctrl |
| 10603247 | ---           | ---          | 0.000856553  | -1.35649 | E11.5 * Sox10 down vs E11.5 * Ctrl |
| 10382435 | Gprc5c        | NM_001110337 | 0.000400628  | -1.35706 | E11.5 * Sox10 down vs E11.5 * Ctrl |
| 10413943 | Lrrc18        | NM_026253    | 1.33712e-005 | -1.35716 | E11.5 * Sox10 down vs E11.5 * Ctrl |
| 10483246 | ---           | ---          | 0.00106754   | -1.35723 | E11.5 * Sox10 down vs E11.5 * Ctrl |
| 10403748 | ---           | ---          | 4.72503e-005 | -1.35731 | E11.5 * Sox10 down vs E11.5 * Ctrl |
| 10569456 | ---           | ---          | 0.000730085  | -1.35829 | E11.5 * Sox10 down vs E11.5 * Ctrl |
| 10426437 | ---           | ---          | 0.00430471   | -1.35838 | E11.5 * Sox10 down vs E11.5 * Ctrl |
| 10459288 | Adrb2         | NM_007420    | 0.00909152   | -1.35845 | E11.5 * Sox10 down vs E11.5 * Ctrl |
| 10491629 | 4932438A13Rik | NM_172679    | 0.000179407  | -1.35846 | E11.5 * Sox10 down vs E11.5 * Ctrl |
| 10381601 | Gm            | M86736       | 0.000462674  | -1.35852 | E11.5 * Sox10 down vs E11.5 * Ctrl |
| 10438749 | ---           | ---          | 0.00194313   | -1.35868 | E11.5 * Sox10 down vs E11.5 * Ctrl |
| 10439268 | Dtx3l         | NM_001013371 | 0.00288943   | -1.35895 | E11.5 * Sox10 down vs E11.5 * Ctrl |
| 10553299 | Ifitm2        | NM_030694    | 0.00754957   | -1.35903 | E11.5 * Sox10 down vs E11.5 * Ctrl |
| 10530692 | Kdr           | NM_010612    | 0.000972655  | -1.35921 | E11.5 * Sox10 down vs E11.5 * Ctrl |
| 10468746 | Hspa12a       | NM_175199    | 0.000544966  | -1.35923 | E11.5 * Sox10 down vs E11.5 * Ctrl |
| 10377534 | A030009H04Rik | AB041807     | 9.03632e-005 | -1.35954 | E11.5 * Sox10 down vs E11.5 * Ctrl |
| 10584067 | Zbtb44        | NM_001115130 | 2.44205e-005 | -1.35954 | E11.5 * Sox10 down vs E11.5 * Ctrl |
| 10428753 | ---           | ---          | 0.000171134  | -1.35981 | E11.5 * Sox10 down vs E11.5 * Ctrl |
| 10490903 | Car13         | NM_024495    | 0.00457447   | -1.35995 | E11.5 * Sox10 down vs E11.5 * Ctrl |
| 10470283 | Egfl7         | NM_198724    | 0.000357801  | -1.3602  | E11.5 * Sox10 down vs E11.5 * Ctrl |
| 10356170 | ---           | ---          | 0.00146454   | -1.36021 | E11.5 * Sox10 down vs E11.5 * Ctrl |
| 10379389 | Adap2         | NM_172133    | 0.000276749  | -1.3603  | E11.5 * Sox10 down vs E11.5 * Ctrl |
| 10543494 | Gm8           | NM_008174    | 0.00915009   | -1.36031 | E11.5 * Sox10 down vs E11.5 * Ctrl |
| 10516221 | D130007C19Rik | AK051152     | 0.000150251  | -1.36035 | E11.5 * Sox10 down vs E11.5 * Ctrl |
| 10430834 | Naga          | NM_008669    | 0.00487712   | -1.36058 | E11.5 * Sox10 down vs E11.5 * Ctrl |
| 10602722 | Spin2         | NM_001005370 | 0.00141448   | -1.36072 | E11.5 * Sox10 down vs E11.5 * Ctrl |
| 10435457 | Parp9         | NM_030253    | 0.000371843  | -1.36075 | E11.5 * Sox10 down vs E11.5 * Ctrl |
| 10379944 | Tbx4          | NM_011536    | 0.00220268   | -1.36088 | E11.5 * Sox10 down vs E11.5 * Ctrl |
| 10505517 | Tlr4          | NM_021297    | 0.000396196  | -1.36154 | E11.5 * Sox10 down vs E11.5 * Ctrl |
| 10456745 | Smad7         | NM_001042660 | 0.000507912  | -1.36164 | E11.5 * Sox10 down vs E11.5 * Ctrl |
| 10504106 | Il1ra1        | NM_010549    | 0.000143866  | -1.36185 | E11.5 * Sox10 down vs E11.5 * Ctrl |
| 10556302 | Ampd3         | NM_009667    | 0.00504942   | -1.36244 | E11.5 * Sox10 down vs E11.5 * Ctrl |
| 10568001 | Sult1a1       | NM_133670    | 0.000434304  | -1.36273 | E11.5 * Sox10 down vs E11.5 * Ctrl |
| 10378216 | Atp2a3        | NM_016745    | 3.05219e-005 | -1.36292 | E11.5 * Sox10 down vs E11.5 * Ctrl |
| 10560190 | Ehd2          | NM_153068    | 0.000605586  | -1.363   | E11.5 * Sox10 down vs E11.5 * Ctrl |
| 10590690 | Dync2h1       | NM_029851    | 2.62631e-006 | -1.36317 | E11.5 * Sox10 down vs E11.5 * Ctrl |
| 10391404 | D830013H23Rik | AK052868     | 0.00375629   | -1.3632  | E11.5 * Sox10 down vs E11.5 * Ctrl |
| 10395103 | Pxdn          | NM_181395    | 0.000149991  | -1.36339 | E11.5 * Sox10 down vs E11.5 * Ctrl |
| 10447130 | Pkdcc         | NM_134117    | 0.000185763  | -1.36339 | E11.5 * Sox10 down vs E11.5 * Ctrl |
| 10369688 | Tet1          | ENSMUST00000 | 0.00223889   | -1.36376 | E11.5 * Sox10 down vs E11.5 * Ctrl |
| 10424731 | Gsdmd         | NM_026960    | 0.00750803   | -1.3639  | E11.5 * Sox10 down vs E11.5 * Ctrl |
| 10400510 | Clec14a       | NM_025809    | 0.0103661    | -1.36416 | E11.5 * Sox10 down vs E11.5 * Ctrl |
| 10370037 | Mmp11         | NM_008606    | 0.0020476    | -1.36448 | E11.5 * Sox10 down vs E11.5 * Ctrl |
| 10528008 | Steap2        | NM_001103157 | 0.00121523   | -1.36449 | E11.5 * Sox10 down vs E11.5 * Ctrl |
| 10363786 | Ank3          | NM_146005    | 0.000503011  | -1.36453 | E11.5 * Sox10 down vs E11.5 * Ctrl |
| 10488299 | OTTMUSG00000  | NM_001037929 | 0.000669096  | -1.36461 | E11.5 * Sox10 down vs E11.5 * Ctrl |
| 10432408 | C1ql4         | NM_001024702 | 0.00362722   | -1.36482 | E11.5 * Sox10 down vs E11.5 * Ctrl |
| 10532517 | Cryba4        | NM_021351    | 0.00454875   | -1.36506 | E11.5 * Sox10 down vs E11.5 * Ctrl |
| 10462507 | Papss2        | NM_011864    | 0.000268099  | -1.36516 | E11.5 * Sox10 down vs E11.5 * Ctrl |
| 10346564 | Casp8         | NM_009812    | 0.00514749   | -1.36522 | E11.5 * Sox10 down vs E11.5 * Ctrl |
| 10406205 | Erap1         | NM_030711    | 0.00568769   | -1.36603 | E11.5 * Sox10 down vs E11.5 * Ctrl |
| 10492310 | Mbnl1         | NM_020007    | 2.96399e-006 | -1.36608 | E11.5 * Sox10 down vs E11.5 * Ctrl |
| 10492864 | Sh3d19        | NM_001082414 | 5.3203e-005  | -1.36619 | E11.5 * Sox10 down vs E11.5 * Ctrl |

|          |               |              |              |          |                                    |
|----------|---------------|--------------|--------------|----------|------------------------------------|
| 10376074 | P4ha2         | NM_001136076 | 0.0100576    | -1.36632 | E11.5 * Sox10 down vs E11.5 * Ctrl |
| 10552500 | Klk8          | NM_008940    | 0.000375454  | -1.36642 | E11.5 * Sox10 down vs E11.5 * Ctrl |
| 10531790 | Nkx6-1        | NM_144955    | 6.29765e-005 | -1.36647 | E11.5 * Sox10 down vs E11.5 * Ctrl |
| 10503315 | E130016E03Rik | NM_001039556 | 0.000203298  | -1.36669 | E11.5 * Sox10 down vs E11.5 * Ctrl |
| 10353311 | Jph1          | NM_020604    | 0.00238666   | -1.36672 | E11.5 * Sox10 down vs E11.5 * Ctrl |
| 10511789 | Nkain3        | NM_172987    | 0.000455819  | -1.36688 | E11.5 * Sox10 down vs E11.5 * Ctrl |
| 10579765 | ---           | ---          | 0.000256006  | -1.36705 | E11.5 * Sox10 down vs E11.5 * Ctrl |
| 10552358 | I1C0022H11Rik | NM_001034893 | 0.000219462  | -1.36756 | E11.5 * Sox10 down vs E11.5 * Ctrl |
| 10597945 | Tmem158       | NM_001002267 | 0.00017442   | -1.36769 | E11.5 * Sox10 down vs E11.5 * Ctrl |
| 10454398 | AW554918      | NM_001033532 | 0.00129001   | -1.36776 | E11.5 * Sox10 down vs E11.5 * Ctrl |
| 10358982 | Mr1           | NM_008209    | 0.00526315   | -1.36789 | E11.5 * Sox10 down vs E11.5 * Ctrl |
| 10546421 | Prickle2      | NM_001134461 | 0.00123788   | -1.36835 | E11.5 * Sox10 down vs E11.5 * Ctrl |
| 10392683 | ENSMUSG0000C  | ENSMUST00000 | 0.000315727  | -1.36934 | E11.5 * Sox10 down vs E11.5 * Ctrl |
| 10467013 | Prkg1         | NM_001013833 | 0.000179075  | -1.36941 | E11.5 * Sox10 down vs E11.5 * Ctrl |
| 10514193 | ---           | ---          | 0.000398337  | -1.36969 | E11.5 * Sox10 down vs E11.5 * Ctrl |
| 10564667 | Ntrk3         | NM_008746    | 0.0101812    | -1.36985 | E11.5 * Sox10 down vs E11.5 * Ctrl |
| 10604135 | Dppa3         | NM_139218    | 0.000318162  | -1.37069 | E11.5 * Sox10 down vs E11.5 * Ctrl |
| 10576581 | Kcnk1         | NM_008430    | 0.00648623   | -1.37085 | E11.5 * Sox10 down vs E11.5 * Ctrl |
| 10602756 | Smpx          | NM_025357    | 0.000696766  | -1.371   | E11.5 * Sox10 down vs E11.5 * Ctrl |
| 10514779 | Prkaa2        | NM_178143    | 0.000863605  | -1.37122 | E11.5 * Sox10 down vs E11.5 * Ctrl |
| 10597279 | Ccrl2         | NM_017466    | 0.00661361   | -1.37138 | E11.5 * Sox10 down vs E11.5 * Ctrl |
| 10584589 | ---           | ---          | 0.00160359   | -1.37202 | E11.5 * Sox10 down vs E11.5 * Ctrl |
| 10436788 | Hunk          | NM_015755    | 0.000164064  | -1.37202 | E11.5 * Sox10 down vs E11.5 * Ctrl |
| 10391119 | I110036O03Rik | NM_176830    | 2.16856e-006 | -1.37209 | E11.5 * Sox10 down vs E11.5 * Ctrl |
| 10578690 | Neil3         | NM_146208    | 7.52305e-005 | -1.37281 | E11.5 * Sox10 down vs E11.5 * Ctrl |
| 10431943 | 100043354     | XR_033584    | 0.00504134   | -1.37293 | E11.5 * Sox10 down vs E11.5 * Ctrl |
| 10400708 | ---           | ---          | 0.000297457  | -1.373   | E11.5 * Sox10 down vs E11.5 * Ctrl |
| 10498647 | B3galnt1      | NM_020026    | 1.03892e-006 | -1.37313 | E11.5 * Sox10 down vs E11.5 * Ctrl |
| 10575534 | St3gal2       | NM_009179    | 4.16178e-006 | -1.37329 | E11.5 * Sox10 down vs E11.5 * Ctrl |
| 10353947 | Tmem131       | NM_018872    | 3.84513e-008 | -1.37347 | E11.5 * Sox10 down vs E11.5 * Ctrl |
| 10548752 | ---           | ---          | 0.00266594   | -1.37402 | E11.5 * Sox10 down vs E11.5 * Ctrl |
| 10457225 | Map3k8        | NM_007746    | 0.000488749  | -1.37406 | E11.5 * Sox10 down vs E11.5 * Ctrl |
| 10421418 | Epb4.9        | NM_013514    | 1.62274e-005 | -1.37416 | E11.5 * Sox10 down vs E11.5 * Ctrl |
| 10463476 | Kazald1       | NM_178929    | 0.00218482   | -1.37465 | E11.5 * Sox10 down vs E11.5 * Ctrl |
| 10566543 | Dchs1         | ENSMUST00000 | 0.00552203   | -1.37471 | E11.5 * Sox10 down vs E11.5 * Ctrl |
| 10489204 | Tgm2          | NM_009373    | 0.000160786  | -1.37476 | E11.5 * Sox10 down vs E11.5 * Ctrl |
| 10379630 | Sifn2         | NM_011408    | 0.00977238   | -1.3748  | E11.5 * Sox10 down vs E11.5 * Ctrl |
| 10404612 | Rreb1         | NM_001013392 | 0.000996093  | -1.37536 | E11.5 * Sox10 down vs E11.5 * Ctrl |
| 10445542 | ---           | ---          | 0.00373531   | -1.37553 | E11.5 * Sox10 down vs E11.5 * Ctrl |
| 10581992 | Maf           | NM_001025577 | 0.00231147   | -1.37603 | E11.5 * Sox10 down vs E11.5 * Ctrl |
| 10398382 | ---           | ---          | 0.000122946  | -1.37764 | E11.5 * Sox10 down vs E11.5 * Ctrl |
| 10368199 | Myb           | NM_010848    | 0.000179027  | -1.37802 | E11.5 * Sox10 down vs E11.5 * Ctrl |
| 10516481 | Gja4          | NM_008120    | 0.0001477    | -1.37831 | E11.5 * Sox10 down vs E11.5 * Ctrl |
| 10552363 | I1C0022H11Rik | NM_001034893 | 0.00010484   | -1.37887 | E11.5 * Sox10 down vs E11.5 * Ctrl |
| 10381408 | Ifi35         | NM_027320    | 8.36798e-005 | -1.37921 | E11.5 * Sox10 down vs E11.5 * Ctrl |
| 10410173 | Hiat1         | NM_133680    | 0.00589842   | -1.37922 | E11.5 * Sox10 down vs E11.5 * Ctrl |
| 10408185 | Btn2a2        | NM_175938    | 2.9549e-005  | -1.37933 | E11.5 * Sox10 down vs E11.5 * Ctrl |
| 10606362 | ---           | ---          | 0.000139874  | -1.37963 | E11.5 * Sox10 down vs E11.5 * Ctrl |
| 10443027 | A930001N09Rik | NM_029870    | 6.43592e-005 | -1.37996 | E11.5 * Sox10 down vs E11.5 * Ctrl |
| 10375137 | Kcnmb1        | NM_031169    | 0.00207742   | -1.38003 | E11.5 * Sox10 down vs E11.5 * Ctrl |
| 10473809 | Sfp1          | NM_011355    | 1.44401e-005 | -1.38016 | E11.5 * Sox10 down vs E11.5 * Ctrl |
| 10391504 | Meox1         | NM_010791    | 0.00413326   | -1.38021 | E11.5 * Sox10 down vs E11.5 * Ctrl |
| 10375229 | ---           | ---          | 0.00722698   | -1.38042 | E11.5 * Sox10 down vs E11.5 * Ctrl |
| 10528332 | Napepld       | NM_178728    | 3.62806e-006 | -1.38061 | E11.5 * Sox10 down vs E11.5 * Ctrl |
| 10387536 | Cd68          | NM_009853    | 0.00380741   | -1.38065 | E11.5 * Sox10 down vs E11.5 * Ctrl |
| 10427095 | Tenc1         | NM_153533    | 0.000132765  | -1.38081 | E11.5 * Sox10 down vs E11.5 * Ctrl |
| 10367475 | ---           | ---          | 4.84582e-005 | -1.3814  | E11.5 * Sox10 down vs E11.5 * Ctrl |
| 10596072 | 3222402P14Rik | BC151170     | 7.58794e-005 | -1.38145 | E11.5 * Sox10 down vs E11.5 * Ctrl |
| 10472860 | Rapgef4       | NM_019688    | 0.000809957  | -1.38163 | E11.5 * Sox10 down vs E11.5 * Ctrl |
| 10359377 | Zbtb37        | NM_173424    | 6.25348e-006 | -1.38184 | E11.5 * Sox10 down vs E11.5 * Ctrl |
| 10412394 | Nnt           | NR_003544    | 5.07419e-005 | -1.38219 | E11.5 * Sox10 down vs E11.5 * Ctrl |
| 10390032 | Acsf2         | NM_153807    | 0.00201792   | -1.38268 | E11.5 * Sox10 down vs E11.5 * Ctrl |
| 10351347 | Creg1         | NM_011804    | 0.000471453  | -1.38274 | E11.5 * Sox10 down vs E11.5 * Ctrl |
| 10440186 | Crybg3        | NM_174848    | 0.00295721   | -1.38471 | E11.5 * Sox10 down vs E11.5 * Ctrl |
| 10436608 | Cxadr         | NM_009988    | 1.16598e-005 | -1.38492 | E11.5 * Sox10 down vs E11.5 * Ctrl |
| 10603567 | Dynlt3        | NM_025975    | 0.00205539   | -1.38509 | E11.5 * Sox10 down vs E11.5 * Ctrl |

|                        |              |              |          |                                    |
|------------------------|--------------|--------------|----------|------------------------------------|
| 10580056 Lphn1         | NM_181039    | 0.000141642  | -1.38544 | E11.5 * Sox10 down vs E11.5 * Ctrl |
| 10549276 Bhlhe41       | NM_024469    | 1.416e-005   | -1.3855  | E11.5 * Sox10 down vs E11.5 * Ctrl |
| 10485070 Mdk           | NM_010784    | 0.000271203  | -1.38591 | E11.5 * Sox10 down vs E11.5 * Ctrl |
| 10460968 Rasgrp2       | NM_011242    | 1.58133e-005 | -1.38631 | E11.5 * Sox10 down vs E11.5 * Ctrl |
| 10371740 Ano4          | NM_178773    | 0.000263548  | -1.38671 | E11.5 * Sox10 down vs E11.5 * Ctrl |
| 10476740 Slc24a3       | NM_053195    | 0.00221709   | -1.38673 | E11.5 * Sox10 down vs E11.5 * Ctrl |
| 10605616 Il1rap1       | BC119580     | 0.00263047   | -1.38732 | E11.5 * Sox10 down vs E11.5 * Ctrl |
| 10598603               |              | 9.18013e-005 | -1.38744 | E11.5 * Sox10 down vs E11.5 * Ctrl |
| 10557033 Eef2k         | ENSMUST00000 | 0.000803918  | -1.38766 | E11.5 * Sox10 down vs E11.5 * Ctrl |
| 10399820 Acp1          | NM_001110239 | 0.00143566   | -1.38789 | E11.5 * Sox10 down vs E11.5 * Ctrl |
| 10544660 Osbp13        | NM_027881    | 1.51317e-005 | -1.3879  | E11.5 * Sox10 down vs E11.5 * Ctrl |
| 10517967 Fblim1        | NM_133754    | 0.00133941   | -1.38834 | E11.5 * Sox10 down vs E11.5 * Ctrl |
| 10558410 Ptpre         | NM_011212    | 0.00140063   | -1.38872 | E11.5 * Sox10 down vs E11.5 * Ctrl |
| 10462195 Kank1         | NM_181404    | 0.000197848  | -1.38895 | E11.5 * Sox10 down vs E11.5 * Ctrl |
| 10372208 Acss3         | NM_001142804 | 0.000606859  | -1.38899 | E11.5 * Sox10 down vs E11.5 * Ctrl |
| 10599736 Fhl1          | NM_001077361 | 3.10479e-006 | -1.38923 | E11.5 * Sox10 down vs E11.5 * Ctrl |
| 10563858 Gabrg3        | NM_008074    | 0.00484358   | -1.38945 | E11.5 * Sox10 down vs E11.5 * Ctrl |
| 10371379 Nuak1         | NM_001004363 | 0.000826783  | -1.38946 | E11.5 * Sox10 down vs E11.5 * Ctrl |
| 10494565 Fmo5          | NM_010232    | 0.000104911  | -1.38965 | E11.5 * Sox10 down vs E11.5 * Ctrl |
| 10543952 9330158H04Rik | ENSMUST00000 | 0.00137235   | -1.39015 | E11.5 * Sox10 down vs E11.5 * Ctrl |
| 10394938               | ---          | 0.000633685  | -1.39018 | E11.5 * Sox10 down vs E11.5 * Ctrl |
| 10399657               | ---          | 0.000633685  | -1.39018 | E11.5 * Sox10 down vs E11.5 * Ctrl |
| 10567995 Nupr1         | NM_019738    | 0.000113415  | -1.3906  | E11.5 * Sox10 down vs E11.5 * Ctrl |
| 10492402 Kcnab1        | NM_010597    | 0.000107159  | -1.39084 | E11.5 * Sox10 down vs E11.5 * Ctrl |
| 10511446 Asph          | NM_023066    | 7.94966e-006 | -1.3914  | E11.5 * Sox10 down vs E11.5 * Ctrl |
| 10561104 Axl           | NM_009465    | 0.00053643   | -1.3916  | E11.5 * Sox10 down vs E11.5 * Ctrl |
| 10525487 4932422M17Rik | ENSMUST00000 | 0.00251801   | -1.39203 | E11.5 * Sox10 down vs E11.5 * Ctrl |
| 10377662 Ybx2          | NM_016875    | 0.000111006  | -1.39224 | E11.5 * Sox10 down vs E11.5 * Ctrl |
| 10344815 Cspp1         | NM_026493    | 0.0022856    | -1.39232 | E11.5 * Sox10 down vs E11.5 * Ctrl |
| 10363856 2310015B20Rik | ENSMUST00000 | 0.00600946   | -1.39271 | E11.5 * Sox10 down vs E11.5 * Ctrl |
| 10551169 B3gnt8        | NM_146184    | 0.00756905   | -1.39296 | E11.5 * Sox10 down vs E11.5 * Ctrl |
| 10439830               | ---          | 0.0038549    | -1.39302 | E11.5 * Sox10 down vs E11.5 * Ctrl |
| 10531952 Abcg3         | NM_030239    | 0.000293999  | -1.39321 | E11.5 * Sox10 down vs E11.5 * Ctrl |
| 10346072               | ---          | 0.000159286  | -1.39439 | E11.5 * Sox10 down vs E11.5 * Ctrl |
| 10413047 Plau          | NM_008873    | 0.00618818   | -1.39444 | E11.5 * Sox10 down vs E11.5 * Ctrl |
| 10472982               | ---          | 0.00636867   | -1.39449 | E11.5 * Sox10 down vs E11.5 * Ctrl |
| 10550877 Kcnn4         | NM_008433    | 1.7438e-005  | -1.39479 | E11.5 * Sox10 down vs E11.5 * Ctrl |
| 10448094 Lnpep         | NM_172827    | 0.000191516  | -1.39494 | E11.5 * Sox10 down vs E11.5 * Ctrl |
| 10376201 Gpx3          | NM_001083929 | 6.74613e-005 | -1.39505 | E11.5 * Sox10 down vs E11.5 * Ctrl |
| 10410408 Adcy2         | NM_153534    | 0.002238     | -1.39549 | E11.5 * Sox10 down vs E11.5 * Ctrl |
| 10395287 Atxn7l1       | NM_028139    | 2.24087e-006 | -1.39574 | E11.5 * Sox10 down vs E11.5 * Ctrl |
| 10428511 Csmd3         | NM_001081391 | 0.00609481   | -1.39591 | E11.5 * Sox10 down vs E11.5 * Ctrl |
| 10372796 Hmga2         | NM_010441    | 0.000140417  | -1.39624 | E11.5 * Sox10 down vs E11.5 * Ctrl |
| 10564539 Mctp2         | NM_001024703 | 0.000271448  | -1.39642 | E11.5 * Sox10 down vs E11.5 * Ctrl |
| 10361509 Syne1         | NM_001079686 | 1.73123e-005 | -1.39647 | E11.5 * Sox10 down vs E11.5 * Ctrl |
| 10383756 Ifitm2        | NM_030694    | 0.00760594   | -1.39659 | E11.5 * Sox10 down vs E11.5 * Ctrl |
| 10499914 Lce1b         | NM_026822    | 0.00318399   | -1.39659 | E11.5 * Sox10 down vs E11.5 * Ctrl |
| 10568638 Uros          | NM_009479    | 2.54854e-006 | -1.3969  | E11.5 * Sox10 down vs E11.5 * Ctrl |
| 10463911 Add3          | NM_013758    | 8.28387e-005 | -1.39706 | E11.5 * Sox10 down vs E11.5 * Ctrl |
| 10595140               | ---          | 0.00312144   | -1.39761 | E11.5 * Sox10 down vs E11.5 * Ctrl |
| 10591092 Fat3          | NM_001080814 | 0.000137603  | -1.3978  | E11.5 * Sox10 down vs E11.5 * Ctrl |
| 10570002 EG546032      | XM_486078    | 0.00116328   | -1.39793 | E11.5 * Sox10 down vs E11.5 * Ctrl |
| 10382321 Kcnj2         | NM_008425    | 0.00473852   | -1.39803 | E11.5 * Sox10 down vs E11.5 * Ctrl |
| 10587616 Prss35        | NM_178738    | 0.0043341    | -1.39896 | E11.5 * Sox10 down vs E11.5 * Ctrl |
| 10504127 Ccl21a        | NM_011124    | 0.000495203  | -1.39906 | E11.5 * Sox10 down vs E11.5 * Ctrl |
| 10504154 Ccl21a        | NM_011124    | 0.000495203  | -1.39906 | E11.5 * Sox10 down vs E11.5 * Ctrl |
| 10504183 Ccl21a        | NM_011124    | 0.000495203  | -1.39906 | E11.5 * Sox10 down vs E11.5 * Ctrl |
| 10512377 Ccl21a        | NM_011124    | 0.000495203  | -1.39906 | E11.5 * Sox10 down vs E11.5 * Ctrl |
| 10366886 Arhgap9       | NM_146011    | 0.00015644   | -1.39921 | E11.5 * Sox10 down vs E11.5 * Ctrl |
| 10490491 Gata5         | NM_008093    | 6.08492e-006 | -1.39948 | E11.5 * Sox10 down vs E11.5 * Ctrl |
| 10510129 Dhrr3         | NM_011303    | 0.00129027   | -1.39989 | E11.5 * Sox10 down vs E11.5 * Ctrl |
| 10420171 Adcy4         | NM_080435    | 0.00375826   | -1.40005 | E11.5 * Sox10 down vs E11.5 * Ctrl |
| 10388488 Fam101b       | ENSMUST00000 | 0.000508258  | -1.40008 | E11.5 * Sox10 down vs E11.5 * Ctrl |
| 10505779 Acer2         | NM_139306    | 0.000829476  | -1.40018 | E11.5 * Sox10 down vs E11.5 * Ctrl |
| 10454235 Asxl3         | ENSMUST00000 | 3.6092e-005  | -1.4003  | E11.5 * Sox10 down vs E11.5 * Ctrl |
| 10356293 A630001G21Rik | BC052931     | 0.000930064  | -1.40061 | E11.5 * Sox10 down vs E11.5 * Ctrl |

|                        |              |              |          |                                    |
|------------------------|--------------|--------------|----------|------------------------------------|
| 10404402 Foxq1         | NM_008239    | 0.00228361   | -1.40076 | E11.5 * Sox10 down vs E11.5 * Ctrl |
| 10493812 S100a4        | NM_011311    | 0.00251505   | -1.40088 | E11.5 * Sox10 down vs E11.5 * Ctrl |
| 10366707 Avpr1a        | NM_016847    | 0.000684141  | -1.40097 | E11.5 * Sox10 down vs E11.5 * Ctrl |
| 10461078 Ati3          | NM_146091    | 2.67324e-005 | -1.40129 | E11.5 * Sox10 down vs E11.5 * Ctrl |
| 10494151               | ---          | 0.00199907   | -1.40171 | E11.5 * Sox10 down vs E11.5 * Ctrl |
| 10503118 Fam110b       | NM_173426    | 0.00269579   | -1.40208 | E11.5 * Sox10 down vs E11.5 * Ctrl |
| 10445119 H2-M3         | NM_013819    | 0.00052705   | -1.40211 | E11.5 * Sox10 down vs E11.5 * Ctrl |
| 10598750 Gpr34         | NM_011823    | 0.00367685   | -1.40222 | E11.5 * Sox10 down vs E11.5 * Ctrl |
| 10523513 4930522N08Rik | ENSMUST00000 | 0.0042866    | -1.40286 | E11.5 * Sox10 down vs E11.5 * Ctrl |
| 10542894               | ---          | 0.000623916  | -1.4031  | E11.5 * Sox10 down vs E11.5 * Ctrl |
| 10604542 Hs6st2        | NM_001077202 | 9.58747e-005 | -1.40382 | E11.5 * Sox10 down vs E11.5 * Ctrl |
| 10399671 Hpcal1        | NM_016677    | 5.45924e-005 | -1.40445 | E11.5 * Sox10 down vs E11.5 * Ctrl |
| 10491313 Cldn11        | NM_008770    | 0.000102093  | -1.40449 | E11.5 * Sox10 down vs E11.5 * Ctrl |
| 10515771 Tie1          | NM_011587    | 7.09765e-005 | -1.40451 | E11.5 * Sox10 down vs E11.5 * Ctrl |
| 10506767 Echdc2        | NM_026728    | 5.6277e-005  | -1.40498 | E11.5 * Sox10 down vs E11.5 * Ctrl |
| 10552245 Tshz3         | NM_172298    | 3.54274e-005 | -1.40544 | E11.5 * Sox10 down vs E11.5 * Ctrl |
| 10449280 EG383229      | XM_356935    | 0.00528274   | -1.4057  | E11.5 * Sox10 down vs E11.5 * Ctrl |
| 10422962 1110020G09Rik | NM_001085410 | 3.60946e-006 | -1.40581 | E11.5 * Sox10 down vs E11.5 * Ctrl |
| 10381588 Grn           | NM_008175    | 0.000473536  | -1.40611 | E11.5 * Sox10 down vs E11.5 * Ctrl |
| 10402117 Rps6ka5       | NM_153587    | 0.00535494   | -1.40631 | E11.5 * Sox10 down vs E11.5 * Ctrl |
| 10411609               | ---          | 0.000229077  | -1.4065  | E11.5 * Sox10 down vs E11.5 * Ctrl |
| 10586491 Dapk2         | NM_010019    | 3.9683e-005  | -1.40653 | E11.5 * Sox10 down vs E11.5 * Ctrl |
| 10473312 Fam171b       | NM_175514    | 0.00170486   | -1.40659 | E11.5 * Sox10 down vs E11.5 * Ctrl |
| 10481857 Pbx3          | NM_016768    | 8.12171e-006 | -1.40661 | E11.5 * Sox10 down vs E11.5 * Ctrl |
| 10403579 Prl2c5        | NM_181852    | 0.0028893    | -1.40783 | E11.5 * Sox10 down vs E11.5 * Ctrl |
| 10493382 Pklr          | NM_013631    | 0.000261499  | -1.40806 | E11.5 * Sox10 down vs E11.5 * Ctrl |
| 10389214 Ccl9          | NM_011338    | 0.000415107  | -1.40813 | E11.5 * Sox10 down vs E11.5 * Ctrl |
| 10362499 Frk           | NM_001159544 | 0.0002729    | -1.40856 | E11.5 * Sox10 down vs E11.5 * Ctrl |
| 10512919 Grin3a        | NM_001033351 | 8.72757e-005 | -1.40891 | E11.5 * Sox10 down vs E11.5 * Ctrl |
| 10549762 Ccdc106       | NM_146178    | 0.00021333   | -1.40973 | E11.5 * Sox10 down vs E11.5 * Ctrl |
| 10561055 Ceacam2       | NM_001113368 | 0.00300038   | -1.40975 | E11.5 * Sox10 down vs E11.5 * Ctrl |
| 10348739 Sned1         | NM_172463    | 0.00037228   | -1.40976 | E11.5 * Sox10 down vs E11.5 * Ctrl |
| 10459335 Fam38b        | BC147606     | 0.00768313   | -1.4098  | E11.5 * Sox10 down vs E11.5 * Ctrl |
| 10355514 Tns1          | NM_027884    | 0.000172592  | -1.41038 | E11.5 * Sox10 down vs E11.5 * Ctrl |
| 10447923 Tcte2         | NM_022311    | 3.50864e-006 | -1.41049 | E11.5 * Sox10 down vs E11.5 * Ctrl |
| 10605303 Dnase1l1      | NM_027109    | 1.50038e-005 | -1.41086 | E11.5 * Sox10 down vs E11.5 * Ctrl |
| 10531189 Adamts3       | NM_001081401 | 0.00601729   | -1.41115 | E11.5 * Sox10 down vs E11.5 * Ctrl |
| 10557862 Itgam         | NM_001082960 | 0.00433334   | -1.41119 | E11.5 * Sox10 down vs E11.5 * Ctrl |
| 10587554 Tpbp          | NM_011627    | 0.000836846  | -1.41195 | E11.5 * Sox10 down vs E11.5 * Ctrl |
| 10453233 Slc8a1        | NM_011406    | 5.78146e-005 | -1.41244 | E11.5 * Sox10 down vs E11.5 * Ctrl |
| 10406672 Arsb          | NM_009712    | 0.000282111  | -1.41255 | E11.5 * Sox10 down vs E11.5 * Ctrl |
| 10421924 Pcdh9         | NM_001081377 | 0.000586922  | -1.41277 | E11.5 * Sox10 down vs E11.5 * Ctrl |
| 10415991 Zfp395        | NM_199029    | 0.000553075  | -1.4131  | E11.5 * Sox10 down vs E11.5 * Ctrl |
| 10427898 Fbxl7         | NM_176959    | 0.000157132  | -1.41368 | E11.5 * Sox10 down vs E11.5 * Ctrl |
| 10599693 Ncrna00086    | BC052359     | 0.00387942   | -1.41375 | E11.5 * Sox10 down vs E11.5 * Ctrl |
| 10544815 Hibadh        | NM_145567    | 0.000350022  | -1.41392 | E11.5 * Sox10 down vs E11.5 * Ctrl |
| 10538142 Gimap5        | NM_175035    | 0.000163265  | -1.41472 | E11.5 * Sox10 down vs E11.5 * Ctrl |
| 10459496 Ccbe1         | NM_178793    | 2.81521e-007 | -1.41473 | E11.5 * Sox10 down vs E11.5 * Ctrl |
| 10485597 Depdc7        | NM_144804    | 0.00344525   | -1.41604 | E11.5 * Sox10 down vs E11.5 * Ctrl |
| 10398432               | ---          | 0.000656966  | -1.41629 | E11.5 * Sox10 down vs E11.5 * Ctrl |
| 10425410 Grap2         | NM_010815    | 0.000161593  | -1.41696 | E11.5 * Sox10 down vs E11.5 * Ctrl |
| 10582839 ENSMUSG00000  | ENSMUST00000 | 0.00325298   | -1.41718 | E11.5 * Sox10 down vs E11.5 * Ctrl |
| 10369116 Mcm9          | NM_027830    | 0.00104355   | -1.41795 | E11.5 * Sox10 down vs E11.5 * Ctrl |
| 10604564 Gpc4          | NM_008150    | 0.000714623  | -1.41799 | E11.5 * Sox10 down vs E11.5 * Ctrl |
| 10405755               | ---          | 9.01744e-005 | -1.41805 | E11.5 * Sox10 down vs E11.5 * Ctrl |
| 10514926 B230314M03Rik | ENSMUST00000 | 9.59832e-005 | -1.4184  | E11.5 * Sox10 down vs E11.5 * Ctrl |
| 10425092 Cyth4         | NM_028195    | 0.000119622  | -1.41845 | E11.5 * Sox10 down vs E11.5 * Ctrl |
| 10461587 Ms4a4a        | XM_889011    | 0.00368069   | -1.41846 | E11.5 * Sox10 down vs E11.5 * Ctrl |
| 10486119 Plcb2         | NM_177568    | 0.000285372  | -1.41897 | E11.5 * Sox10 down vs E11.5 * Ctrl |
| 10596747 Sema3f        | NM_011349    | 4.80961e-006 | -1.419   | E11.5 * Sox10 down vs E11.5 * Ctrl |
| 10534906 OTTMUSG00000  | ENSMUST00000 | 0.00399975   | -1.41915 | E11.5 * Sox10 down vs E11.5 * Ctrl |
| 10488623 Sox12         | NM_011438    | 4.08072e-005 | -1.4194  | E11.5 * Sox10 down vs E11.5 * Ctrl |
| 10425808 Tspo          | NM_009775    | 0.000129973  | -1.41971 | E11.5 * Sox10 down vs E11.5 * Ctrl |
| 10361250 Camk1g        | NM_144817    | 8.1989e-005  | -1.42053 | E11.5 * Sox10 down vs E11.5 * Ctrl |
| 10528548 Kcnh2         | NM_013569    | 1.22791e-005 | -1.4206  | E11.5 * Sox10 down vs E11.5 * Ctrl |
| 10469066 Ccdc3         | NM_028804    | 0.00466495   | -1.42087 | E11.5 * Sox10 down vs E11.5 * Ctrl |

|          |               |              |              |          |                                    |
|----------|---------------|--------------|--------------|----------|------------------------------------|
| 10491613 | 4932438A13Rik | NM_172679    | 0.00557001   | -1.42114 | E11.5 * Sox10 down vs E11.5 * Ctrl |
| 10394833 | 2410018L13Rik | BC063063     | 0.000267916  | -1.42138 | E11.5 * Sox10 down vs E11.5 * Ctrl |
| 10585803 | Stra6         | NM_009291    | 0.000743742  | -1.4214  | E11.5 * Sox10 down vs E11.5 * Ctrl |
| 10585381 | Slc35f2       | NM_028060    | 0.00457126   | -1.42147 | E11.5 * Sox10 down vs E11.5 * Ctrl |
| 10439523 | ENSMUSG00000  | ENSMUST00000 | 0.00191222   | -1.42219 | E11.5 * Sox10 down vs E11.5 * Ctrl |
| 10369690 | Tet1          | AK129421     | 4.21616e-006 | -1.42238 | E11.5 * Sox10 down vs E11.5 * Ctrl |
| 10568536 | Cpxm2         | NM_018867    | 0.000803733  | -1.4224  | E11.5 * Sox10 down vs E11.5 * Ctrl |
| 10552351 | ---           | ---          | 0.000407843  | -1.4225  | E11.5 * Sox10 down vs E11.5 * Ctrl |
| 10512949 | Abca1         | NM_013454    | 8.18283e-006 | -1.42256 | E11.5 * Sox10 down vs E11.5 * Ctrl |
| 10366376 | Caps2         | NM_178278    | 0.0052627    | -1.42305 | E11.5 * Sox10 down vs E11.5 * Ctrl |
| 10376897 | ---           | ---          | 0.00156777   | -1.42306 | E11.5 * Sox10 down vs E11.5 * Ctrl |
| 10523128 | Ppbp          | NM_023785    | 0.002815     | -1.42401 | E11.5 * Sox10 down vs E11.5 * Ctrl |
| 10573451 | Syce2         | NM_027954    | 2.28631e-007 | -1.42408 | E11.5 * Sox10 down vs E11.5 * Ctrl |
| 10407420 | Net1          | NM_019671    | 0.000332485  | -1.42431 | E11.5 * Sox10 down vs E11.5 * Ctrl |
| 10479165 | Edn3          | NM_007903    | 2.17774e-006 | -1.42444 | E11.5 * Sox10 down vs E11.5 * Ctrl |
| 10533145 | Tpcn1         | NM_145853    | 0.000234173  | -1.42447 | E11.5 * Sox10 down vs E11.5 * Ctrl |
| 10355967 | Ap1s3         | NM_183027    | 0.000287728  | -1.42476 | E11.5 * Sox10 down vs E11.5 * Ctrl |
| 10362138 | Vnn1          | NM_011704    | 0.000859047  | -1.42489 | E11.5 * Sox10 down vs E11.5 * Ctrl |
| 10487208 | Atp8b4        | NM_001080944 | 3.00675e-005 | -1.4249  | E11.5 * Sox10 down vs E11.5 * Ctrl |
| 10404301 | Pr13a1        | NM_025896    | 8.06843e-005 | -1.42513 | E11.5 * Sox10 down vs E11.5 * Ctrl |
| 10482500 | Rnd3          | NM_028810    | 1.25458e-005 | -1.42563 | E11.5 * Sox10 down vs E11.5 * Ctrl |
| 10385872 | Slc22a5       | NM_011396    | 0.000730455  | -1.42564 | E11.5 * Sox10 down vs E11.5 * Ctrl |
| 10554574 | Tm6sf1        | NM_145375    | 0.00825123   | -1.42592 | E11.5 * Sox10 down vs E11.5 * Ctrl |
| 10364262 | Itgb2         | NM_008404    | 0.000121315  | -1.42593 | E11.5 * Sox10 down vs E11.5 * Ctrl |
| 10482880 | Baz2b         | NM_001001182 | 1.71295e-007 | -1.42602 | E11.5 * Sox10 down vs E11.5 * Ctrl |
| 10350749 | EG433365      | NM_001008426 | 0.00504094   | -1.42613 | E11.5 * Sox10 down vs E11.5 * Ctrl |
| 10531338 | ---           | ---          | 0.000178709  | -1.42616 | E11.5 * Sox10 down vs E11.5 * Ctrl |
| 10360185 | ---           | ---          | 0.000510373  | -1.42632 | E11.5 * Sox10 down vs E11.5 * Ctrl |
| 10406334 | Mctp1         | NM_030174    | 3.8102e-006  | -1.42679 | E11.5 * Sox10 down vs E11.5 * Ctrl |
| 10430372 | Rac2          | NM_009008    | 1.67858e-005 | -1.42685 | E11.5 * Sox10 down vs E11.5 * Ctrl |
| 10503376 | OTTMUSG00000  | DQ351292     | 0.00401896   | -1.42755 | E11.5 * Sox10 down vs E11.5 * Ctrl |
| 10495929 | ---           | ---          | 0.00840266   | -1.42786 | E11.5 * Sox10 down vs E11.5 * Ctrl |
| 10384486 | Etaa1         | NM_026576    | 0.000718584  | -1.42807 | E11.5 * Sox10 down vs E11.5 * Ctrl |
| 10404024 | Hist1h4h      | NM_153173    | 0.00791555   | -1.42827 | E11.5 * Sox10 down vs E11.5 * Ctrl |
| 10439547 | Gramd1c       | NM_153528    | 0.00346673   | -1.42862 | E11.5 * Sox10 down vs E11.5 * Ctrl |
| 10414218 | 4930503E14Rik | NM_029131    | 0.00761373   | -1.42883 | E11.5 * Sox10 down vs E11.5 * Ctrl |
| 10446619 | Myom1         | NM_010867    | 0.000361852  | -1.42913 | E11.5 * Sox10 down vs E11.5 * Ctrl |
| 10595702 | 1190002N15Rik | NM_001033145 | 0.000194425  | -1.42945 | E11.5 * Sox10 down vs E11.5 * Ctrl |
| 10451287 | Isg15         | NM_015783    | 0.00132345   | -1.42964 | E11.5 * Sox10 down vs E11.5 * Ctrl |
| 10394789 | B430203G13Rik | AK046603     | 1.9725e-005  | -1.43019 | E11.5 * Sox10 down vs E11.5 * Ctrl |
| 10358272 | Lhx9          | NM_001042577 | 1.14252e-005 | -1.43253 | E11.5 * Sox10 down vs E11.5 * Ctrl |
| 10542885 | 2810474O19Rik | NM_026054    | 0.000409875  | -1.43257 | E11.5 * Sox10 down vs E11.5 * Ctrl |
| 10372139 | Nts           | NM_024435    | 0.000575494  | -1.43291 | E11.5 * Sox10 down vs E11.5 * Ctrl |
| 10354588 | Stk17b        | NM_133810    | 0.00778972   | -1.43376 | E11.5 * Sox10 down vs E11.5 * Ctrl |
| 10390299 | Pnp0          | NM_134021    | 0.000335043  | -1.43381 | E11.5 * Sox10 down vs E11.5 * Ctrl |
| 10435525 | Iqcb1         | NM_177128    | 0.000100553  | -1.43393 | E11.5 * Sox10 down vs E11.5 * Ctrl |
| 10404284 | Pr13d3        | NM_172156    | 0.00068295   | -1.43402 | E11.5 * Sox10 down vs E11.5 * Ctrl |
| 10477942 | Rbl1          | NM_011249    | 0.000610244  | -1.43407 | E11.5 * Sox10 down vs E11.5 * Ctrl |
| 10376239 | Tcp1          | AF357392     | 0.00551331   | -1.4345  | E11.5 * Sox10 down vs E11.5 * Ctrl |
| 10455135 | Pcdhb21       | NM_053146    | 0.00121035   | -1.43505 | E11.5 * Sox10 down vs E11.5 * Ctrl |
| 10456492 | D18Ert653e    | NM_172631    | 0.000314432  | -1.43594 | E11.5 * Sox10 down vs E11.5 * Ctrl |
| 10536494 | Cav2          | NM_016900    | 0.000247311  | -1.43699 | E11.5 * Sox10 down vs E11.5 * Ctrl |
| 10592816 | Hmbs          | NM_013551    | 2.23044e-005 | -1.4372  | E11.5 * Sox10 down vs E11.5 * Ctrl |
| 10362968 | Bves          | NM_024285    | 5.54767e-005 | -1.43775 | E11.5 * Sox10 down vs E11.5 * Ctrl |
| 10449419 | Tead3         | NM_001098226 | 0.000839116  | -1.4389  | E11.5 * Sox10 down vs E11.5 * Ctrl |
| 10385526 | 9930111J21Rik | NM_173434    | 0.000593998  | -1.43907 | E11.5 * Sox10 down vs E11.5 * Ctrl |
| 10368343 | Arg1          | NM_007482    | 0.00262027   | -1.43928 | E11.5 * Sox10 down vs E11.5 * Ctrl |
| 10479294 | ---           | ---          | 0.00204762   | -1.43935 | E11.5 * Sox10 down vs E11.5 * Ctrl |
| 10470555 | Gbgt1         | NM_139197    | 0.000457655  | -1.43975 | E11.5 * Sox10 down vs E11.5 * Ctrl |
| 10415013 | ---           | ---          | 2.14552e-005 | -1.43982 | E11.5 * Sox10 down vs E11.5 * Ctrl |
| 10359970 | Nos1ap        | NM_001109985 | 5.8462e-005  | -1.43999 | E11.5 * Sox10 down vs E11.5 * Ctrl |
| 10491623 | 4932438A13Rik | NM_172679    | 0.00145948   | -1.44012 | E11.5 * Sox10 down vs E11.5 * Ctrl |
| 10407591 | Chrm3         | NM_033269    | 0.00155837   | -1.44031 | E11.5 * Sox10 down vs E11.5 * Ctrl |
| 10598175 | Ear10         | NM_053112    | 0.000286737  | -1.44056 | E11.5 * Sox10 down vs E11.5 * Ctrl |
| 10540359 | Cntn4         | NM_001109749 | 0.000104966  | -1.44066 | E11.5 * Sox10 down vs E11.5 * Ctrl |
| 10354418 | Obfc2a        | NM_028696    | 0.00302083   | -1.44085 | E11.5 * Sox10 down vs E11.5 * Ctrl |

|          |               |              |              |          |                                    |
|----------|---------------|--------------|--------------|----------|------------------------------------|
| 10606445 | Rps6ka6       | NM_025949    | 1.11421e-005 | -1.44143 | E11.5 * Sox10 down vs E11.5 * Ctrl |
| 10492424 | ---           | ---          | 0.000307001  | -1.4417  | E11.5 * Sox10 down vs E11.5 * Ctrl |
| 10445767 | Trem12        | NM_001033405 | 0.000818414  | -1.44204 | E11.5 * Sox10 down vs E11.5 * Ctrl |
| 10523190 | 9130213B05Rik | BC006604     | 0.00020652   | -1.44295 | E11.5 * Sox10 down vs E11.5 * Ctrl |
| 10606182 | ---           | ---          | 0.00382674   | -1.44363 | E11.5 * Sox10 down vs E11.5 * Ctrl |
| 10427052 | Krt7          | NM_033073    | 0.00410699   | -1.44368 | E11.5 * Sox10 down vs E11.5 * Ctrl |
| 10363070 | Gp49a         | NM_008147    | 0.00246985   | -1.44398 | E11.5 * Sox10 down vs E11.5 * Ctrl |
| 10578557 | Ccdc111       | NM_001001184 | 0.000359458  | -1.44408 | E11.5 * Sox10 down vs E11.5 * Ctrl |
| 10607870 | Tlr7          | NM_133211    | 0.00015115   | -1.44447 | E11.5 * Sox10 down vs E11.5 * Ctrl |
| 10531166 | Adamts3       | NM_001081401 | 0.000167143  | -1.44462 | E11.5 * Sox10 down vs E11.5 * Ctrl |
| 10467578 | Pik3ap1       | NM_031376    | 8.23475e-006 | -1.44501 | E11.5 * Sox10 down vs E11.5 * Ctrl |
| 10463410 | Fam178a       | NM_001081225 | 0.000507771  | -1.44522 | E11.5 * Sox10 down vs E11.5 * Ctrl |
| 10462535 | B430203M17Rik | NM_177096    | 0.00493237   | -1.44552 | E11.5 * Sox10 down vs E11.5 * Ctrl |
| 10455873 | Slc12a2       | NM_009194    | 1.45896e-005 | -1.44578 | E11.5 * Sox10 down vs E11.5 * Ctrl |
| 10354649 | Pgap1         | ENSMUST00000 | 0.00307662   | -1.4471  | E11.5 * Sox10 down vs E11.5 * Ctrl |
| 10416700 | Pcdh17        | NM_001013753 | 0.000679509  | -1.44772 | E11.5 * Sox10 down vs E11.5 * Ctrl |
| 10501608 | Vcam1         | NM_011693    | 0.000124157  | -1.44774 | E11.5 * Sox10 down vs E11.5 * Ctrl |
| 10428124 | Rgs22         | ENSMUST00000 | 0.000471401  | -1.44893 | E11.5 * Sox10 down vs E11.5 * Ctrl |
| 10572861 | F2rl3         | NM_007975    | 0.00012132   | -1.44933 | E11.5 * Sox10 down vs E11.5 * Ctrl |
| 10424582 | ---           | ---          | 0.0073048    | -1.44956 | E11.5 * Sox10 down vs E11.5 * Ctrl |
| 10575209 | ---           | ---          | 0.000905255  | -1.44999 | E11.5 * Sox10 down vs E11.5 * Ctrl |
| 10506154 | Alg6          | NM_001081264 | 0.000872068  | -1.45013 | E11.5 * Sox10 down vs E11.5 * Ctrl |
| 10590686 | Ddi1          | NM_027942    | 0.00233523   | -1.45055 | E11.5 * Sox10 down vs E11.5 * Ctrl |
| 10500666 | Ptgrn         | NM_011197    | 0.00302531   | -1.45066 | E11.5 * Sox10 down vs E11.5 * Ctrl |
| 10435345 | Mylk          | NM_139300    | 2.15197e-005 | -1.45092 | E11.5 * Sox10 down vs E11.5 * Ctrl |
| 10435841 | Ccdc52        | NM_144550    | 0.000168396  | -1.45109 | E11.5 * Sox10 down vs E11.5 * Ctrl |
| 10556082 | Ppfibp2       | NM_008905    | 8.72519e-005 | -1.45112 | E11.5 * Sox10 down vs E11.5 * Ctrl |
| 10528679 | Wdr86         | NM_001081441 | 4.44918e-005 | -1.45134 | E11.5 * Sox10 down vs E11.5 * Ctrl |
| 10473406 | Prg3          | NM_016914    | 5.84799e-005 | -1.45136 | E11.5 * Sox10 down vs E11.5 * Ctrl |
| 10584591 | ---           | ---          | 8.50229e-006 | -1.45201 | E11.5 * Sox10 down vs E11.5 * Ctrl |
| 10550388 | Gng8          | NM_010320    | 0.00323772   | -1.45269 | E11.5 * Sox10 down vs E11.5 * Ctrl |
| 10457686 | Dsc2          | NM_013505    | 9.87127e-006 | -1.45313 | E11.5 * Sox10 down vs E11.5 * Ctrl |
| 10405605 | Smad5         | NM_008541    | 4.08537e-007 | -1.45385 | E11.5 * Sox10 down vs E11.5 * Ctrl |
| 10359446 | Al848100      | BC138379     | 5.65506e-005 | -1.45392 | E11.5 * Sox10 down vs E11.5 * Ctrl |
| 10478048 | Lbp           | NM_008489    | 4.23479e-005 | -1.45421 | E11.5 * Sox10 down vs E11.5 * Ctrl |
| 10531175 | Adamts3       | NM_001081401 | 0.00394345   | -1.45502 | E11.5 * Sox10 down vs E11.5 * Ctrl |
| 10409282 | Ror2          | NM_013846    | 8.95856e-005 | -1.4552  | E11.5 * Sox10 down vs E11.5 * Ctrl |
| 10511290 | Tnfrsf18      | NM_009400    | 0.000277184  | -1.45524 | E11.5 * Sox10 down vs E11.5 * Ctrl |
| 10344811 | Cspp1         | NM_026493    | 0.00157588   | -1.45672 | E11.5 * Sox10 down vs E11.5 * Ctrl |
| 10369132 | Fam184a       | NM_001081428 | 6.26634e-006 | -1.45709 | E11.5 * Sox10 down vs E11.5 * Ctrl |
| 10368373 | C030003D03Rik | NM_029881    | 0.000263142  | -1.45724 | E11.5 * Sox10 down vs E11.5 * Ctrl |
| 10520612 | Khk           | NM_008439    | 0.000406073  | -1.45856 | E11.5 * Sox10 down vs E11.5 * Ctrl |
| 10526441 | Upk3b         | NM_175309    | 0.00119969   | -1.45859 | E11.5 * Sox10 down vs E11.5 * Ctrl |
| 10481592 | Dnm1          | NM_010065    | 0.000138478  | -1.45894 | E11.5 * Sox10 down vs E11.5 * Ctrl |
| 10461856 | Gna14         | NM_008137    | 0.00263614   | -1.45901 | E11.5 * Sox10 down vs E11.5 * Ctrl |
| 10432294 | C430014K11Rik | ENSMUST00000 | 7.40814e-006 | -1.45919 | E11.5 * Sox10 down vs E11.5 * Ctrl |
| 10425066 | Csf2rb        | NM_007780    | 0.000167153  | -1.45928 | E11.5 * Sox10 down vs E11.5 * Ctrl |
| 10593834 | Rfpl3s        | NM_183111    | 0.000694939  | -1.46006 | E11.5 * Sox10 down vs E11.5 * Ctrl |
| 10571325 | Mfhas1        | NM_001081279 | 5.64704e-007 | -1.4601  | E11.5 * Sox10 down vs E11.5 * Ctrl |
| 10431894 | Slc38a2       | NM_175121    | 1.70891e-006 | -1.46011 | E11.5 * Sox10 down vs E11.5 * Ctrl |
| 10603417 | Gata1         | NM_008089    | 1.80956e-006 | -1.46028 | E11.5 * Sox10 down vs E11.5 * Ctrl |
| 10399046 | Vipr2         | NM_009511    | 0.00123717   | -1.46036 | E11.5 * Sox10 down vs E11.5 * Ctrl |
| 10597973 | Lztf1         | NM_033322    | 3.29714e-005 | -1.46092 | E11.5 * Sox10 down vs E11.5 * Ctrl |
| 10572800 | Klf2          | NM_008452    | 0.00155844   | -1.46125 | E11.5 * Sox10 down vs E11.5 * Ctrl |
| 10571530 | Fat1          | NM_001081286 | 1.90546e-006 | -1.46168 | E11.5 * Sox10 down vs E11.5 * Ctrl |
| 10549504 | Dennd5b       | NM_177192    | 0.00328421   | -1.46207 | E11.5 * Sox10 down vs E11.5 * Ctrl |
| 10564235 | ---           | ---          | 0.0060033    | -1.46263 | E11.5 * Sox10 down vs E11.5 * Ctrl |
| 10584317 | Esam          | NM_027102    | 0.000155678  | -1.4628  | E11.5 * Sox10 down vs E11.5 * Ctrl |
| 10506225 | Cachd1        | NM_198037    | 0.000346547  | -1.46332 | E11.5 * Sox10 down vs E11.5 * Ctrl |
| 10395978 | Gm527         | BC099503     | 0.000158374  | -1.46386 | E11.5 * Sox10 down vs E11.5 * Ctrl |
| 10482509 | Rbm43         | NM_001141981 | 0.000542656  | -1.46407 | E11.5 * Sox10 down vs E11.5 * Ctrl |
| 10350471 | ---           | ---          | 0.00255445   | -1.46419 | E11.5 * Sox10 down vs E11.5 * Ctrl |
| 10409866 | Ctla2b        | NM_007797    | 0.00119752   | -1.46481 | E11.5 * Sox10 down vs E11.5 * Ctrl |
| 10406419 | Lysmd3        | NM_030257    | 0.0012489    | -1.46489 | E11.5 * Sox10 down vs E11.5 * Ctrl |
| 10489878 | Ptgis         | NM_008968    | 2.36435e-005 | -1.46514 | E11.5 * Sox10 down vs E11.5 * Ctrl |
| 10528788 | ENSMUSG00000  | ENSMUST00000 | 0.00207415   | -1.46527 | E11.5 * Sox10 down vs E11.5 * Ctrl |

|          |               |              |              |          |                                    |
|----------|---------------|--------------|--------------|----------|------------------------------------|
| 10428388 | Rspo2         | NM_172815    | 0.00111194   | -1.46617 | E11.5 * Sox10 down vs E11.5 * Ctrl |
| 10463404 | Fam178a       | NM_001081225 | 4.10082e-007 | -1.46629 | E11.5 * Sox10 down vs E11.5 * Ctrl |
| 10353524 | Ogfr1         | NM_001081079 | 5.40671e-005 | -1.4671  | E11.5 * Sox10 down vs E11.5 * Ctrl |
| 10531529 | Cnot6l        | NM_178854    | 2.23374e-006 | -1.46716 | E11.5 * Sox10 down vs E11.5 * Ctrl |
| 10582078 | ---           | ---          | 0.00303169   | -1.46759 | E11.5 * Sox10 down vs E11.5 * Ctrl |
| 10413416 | Il17rd        | NM_134437    | 8.43741e-005 | -1.46808 | E11.5 * Sox10 down vs E11.5 * Ctrl |
| 10356520 | Col6a3        | AF064749     | 0.000121348  | -1.46827 | E11.5 * Sox10 down vs E11.5 * Ctrl |
| 10407097 | Pde4d         | NM_011056    | 8.54555e-009 | -1.46836 | E11.5 * Sox10 down vs E11.5 * Ctrl |
| 10528664 | Smarcd3       | NM_025891    | 6.92879e-005 | -1.46861 | E11.5 * Sox10 down vs E11.5 * Ctrl |
| 10384233 | Tns3          | NM_001083587 | 6.37175e-005 | -1.46895 | E11.5 * Sox10 down vs E11.5 * Ctrl |
| 10457077 | Fbxo15        | NM_015798    | 0.00182503   | -1.46917 | E11.5 * Sox10 down vs E11.5 * Ctrl |
| 10551250 | ---           | ---          | 0.00204854   | -1.46959 | E11.5 * Sox10 down vs E11.5 * Ctrl |
| 10407049 | 3830408C21Rik | ENSMUST00000 | 0.000210317  | -1.47028 | E11.5 * Sox10 down vs E11.5 * Ctrl |
| 10583669 | AB124611      | AB124611     | 0.000480326  | -1.47105 | E11.5 * Sox10 down vs E11.5 * Ctrl |
| 10412699 | ---           | ---          | 0.0050997    | -1.47117 | E11.5 * Sox10 down vs E11.5 * Ctrl |
| 10523260 | Shroom3       | NM_015756    | 7.84566e-006 | -1.47134 | E11.5 * Sox10 down vs E11.5 * Ctrl |
| 10357856 | ---           | ---          | 0.00066397   | -1.47148 | E11.5 * Sox10 down vs E11.5 * Ctrl |
| 10544827 | ---           | ---          | 0.000732758  | -1.47172 | E11.5 * Sox10 down vs E11.5 * Ctrl |
| 10542181 | Clec9a        | NM_172732    | 0.000517276  | -1.47251 | E11.5 * Sox10 down vs E11.5 * Ctrl |
| 10544801 | Hoxa11        | NM_010450    | 9.76501e-005 | -1.47266 | E11.5 * Sox10 down vs E11.5 * Ctrl |
| 10410973 | ---           | ---          | 1.59122e-005 | -1.47302 | E11.5 * Sox10 down vs E11.5 * Ctrl |
| 10374350 | ---           | ---          | 0.000212644  | -1.47311 | E11.5 * Sox10 down vs E11.5 * Ctrl |
| 10461150 | ---           | ---          | 0.00302725   | -1.47317 | E11.5 * Sox10 down vs E11.5 * Ctrl |
| 10504121 | 4933409K07Rik | BC059060     | 0.00364764   | -1.47319 | E11.5 * Sox10 down vs E11.5 * Ctrl |
| 10436182 | Cd47          | NM_010581    | 5.15279e-005 | -1.47355 | E11.5 * Sox10 down vs E11.5 * Ctrl |
| 10543591 | Opn1sw        | NM_007538    | 0.00128338   | -1.47355 | E11.5 * Sox10 down vs E11.5 * Ctrl |
| 10446425 | ---           | ---          | 0.00036753   | -1.47393 | E11.5 * Sox10 down vs E11.5 * Ctrl |
| 10466224 | Ms4a3         | NM_133246    | 0.00277789   | -1.47423 | E11.5 * Sox10 down vs E11.5 * Ctrl |
| 10588007 | Tfdp2         | NM_178667    | 3.43642e-009 | -1.47444 | E11.5 * Sox10 down vs E11.5 * Ctrl |
| 10491885 | Pcdh10        | NM_001098171 | 0.000641947  | -1.47484 | E11.5 * Sox10 down vs E11.5 * Ctrl |
| 10573924 | Mmp2          | NM_008610    | 0.000337845  | -1.475   | E11.5 * Sox10 down vs E11.5 * Ctrl |
| 10513141 | Ptpn3         | NM_011207    | 0.000490162  | -1.47529 | E11.5 * Sox10 down vs E11.5 * Ctrl |
| 10390269 | ---           | ---          | 0.00576695   | -1.47582 | E11.5 * Sox10 down vs E11.5 * Ctrl |
| 10364444 | Madcam1       | NM_013591    | 0.00183022   | -1.47647 | E11.5 * Sox10 down vs E11.5 * Ctrl |
| 10489377 | Serinc3       | NM_012032    | 2.7444e-009  | -1.47647 | E11.5 * Sox10 down vs E11.5 * Ctrl |
| 10379615 | Slfn5         | NM_183201    | 0.0014784    | -1.47812 | E11.5 * Sox10 down vs E11.5 * Ctrl |
| 10419162 | 4930503E14Rik | NM_029131    | 0.00389651   | -1.47883 | E11.5 * Sox10 down vs E11.5 * Ctrl |
| 10510150 | OTTMUSG00000  | NM_001014397 | 0.0102129    | -1.479   | E11.5 * Sox10 down vs E11.5 * Ctrl |
| 10353061 | ---           | ---          | 0.00811249   | -1.47904 | E11.5 * Sox10 down vs E11.5 * Ctrl |
| 10344807 | Cspp1         | NM_026493    | 2.23522e-005 | -1.47945 | E11.5 * Sox10 down vs E11.5 * Ctrl |
| 10548940 | Lmo3          | NM_207222    | 0.00434081   | -1.47973 | E11.5 * Sox10 down vs E11.5 * Ctrl |
| 10404407 | Foxc1         | NM_008592    | 0.000195573  | -1.48037 | E11.5 * Sox10 down vs E11.5 * Ctrl |
| 10564237 | ENSMUSG00000  | ENSMUST00000 | 0.00112597   | -1.48062 | E11.5 * Sox10 down vs E11.5 * Ctrl |
| 10386110 | Hand1         | NM_008213    | 2.27816e-005 | -1.48085 | E11.5 * Sox10 down vs E11.5 * Ctrl |
| 10462281 | Vldlr         | NM_013703    | 0.0002472    | -1.48087 | E11.5 * Sox10 down vs E11.5 * Ctrl |
| 10524310 | Ttc28         | BC002262     | 0.00207344   | -1.48119 | E11.5 * Sox10 down vs E11.5 * Ctrl |
| 10580990 | Cdh8          | NM_001039154 | 8.79126e-005 | -1.48121 | E11.5 * Sox10 down vs E11.5 * Ctrl |
| 10422598 | Sepp1         | NM_009155    | 0.00115917   | -1.48134 | E11.5 * Sox10 down vs E11.5 * Ctrl |
| 10394860 | B230354O11Rik | AK046228     | 0.00267376   | -1.48144 | E11.5 * Sox10 down vs E11.5 * Ctrl |
| 10471929 | Arhgap15      | NM_153820    | 0.00221986   | -1.48209 | E11.5 * Sox10 down vs E11.5 * Ctrl |
| 10548727 | ---           | ---          | 0.00978735   | -1.4824  | E11.5 * Sox10 down vs E11.5 * Ctrl |
| 10495206 | Slc16a4       | NM_146136    | 1.61084e-006 | -1.48255 | E11.5 * Sox10 down vs E11.5 * Ctrl |
| 10564233 | ---           | ---          | 0.00180435   | -1.4827  | E11.5 * Sox10 down vs E11.5 * Ctrl |
| 10355536 | Tns1          | NM_027884    | 0.00701867   | -1.48293 | E11.5 * Sox10 down vs E11.5 * Ctrl |
| 10517517 | C1qa          | NM_007572    | 6.30298e-005 | -1.48336 | E11.5 * Sox10 down vs E11.5 * Ctrl |
| 10389022 | Myo1d         | NM_177390    | 0.00385305   | -1.48349 | E11.5 * Sox10 down vs E11.5 * Ctrl |
| 10416732 | Snora30       | AF357389     | 0.00257874   | -1.48363 | E11.5 * Sox10 down vs E11.5 * Ctrl |
| 10557703 | Snora30       | AF357389     | 0.00257874   | -1.48363 | E11.5 * Sox10 down vs E11.5 * Ctrl |
| 10506335 | Pde4b         | NM_019840    | 0.000171777  | -1.48368 | E11.5 * Sox10 down vs E11.5 * Ctrl |
| 10383168 | ---           | ---          | 1.73833e-005 | -1.48475 | E11.5 * Sox10 down vs E11.5 * Ctrl |
| 10359339 | Rabgap1l      | NM_013862    | 0.000113867  | -1.48476 | E11.5 * Sox10 down vs E11.5 * Ctrl |
| 10380558 | ---           | ---          | 3.66854e-005 | -1.48484 | E11.5 * Sox10 down vs E11.5 * Ctrl |
| 10438769 | Cldn1         | NM_016674    | 0.00626593   | -1.48551 | E11.5 * Sox10 down vs E11.5 * Ctrl |
| 10484999 | Ddb2          | NM_028119    | 1.14093e-006 | -1.48557 | E11.5 * Sox10 down vs E11.5 * Ctrl |
| 10581538 | Nqo1          | NM_008706    | 0.00113537   | -1.48581 | E11.5 * Sox10 down vs E11.5 * Ctrl |
| 10389300 | Dhrs11        | NM_177564    | 0.000424509  | -1.48658 | E11.5 * Sox10 down vs E11.5 * Ctrl |

|                        |              |              |          |                                    |
|------------------------|--------------|--------------|----------|------------------------------------|
| 10527940 Pftk1         | NM_011074    | 2.6945e-005  | -1.48766 | E11.5 * Sox10 down vs E11.5 * Ctrl |
| 10425761               | ---          | 6.15568e-006 | -1.48799 | E11.5 * Sox10 down vs E11.5 * Ctrl |
| 10385513 9930111J21Rik | NM_173434    | 0.000610043  | -1.48818 | E11.5 * Sox10 down vs E11.5 * Ctrl |
| 10539211 Lrrtm4        | NR_027323    | 2.25836e-005 | -1.48852 | E11.5 * Sox10 down vs E11.5 * Ctrl |
| 10443786 Pde9a         | NM_008804    | 8.83227e-006 | -1.48869 | E11.5 * Sox10 down vs E11.5 * Ctrl |
| 10531201 Adamts3       | NM_001081401 | 0.000355894  | -1.48878 | E11.5 * Sox10 down vs E11.5 * Ctrl |
| 10533462 Rad9b         | NM_144912    | 0.00248939   | -1.49021 | E11.5 * Sox10 down vs E11.5 * Ctrl |
| 10404294 Prl3b1        | NM_008865    | 4.67331e-006 | -1.49038 | E11.5 * Sox10 down vs E11.5 * Ctrl |
| 10607486 Ptchd1        | NM_001093750 | 6.85975e-007 | -1.49071 | E11.5 * Sox10 down vs E11.5 * Ctrl |
| 10346878 Zdbf2         | ENSMUST00000 | 3.97789e-006 | -1.49116 | E11.5 * Sox10 down vs E11.5 * Ctrl |
| 10565958 P2ry6         | NM_183168    | 0.000104047  | -1.49213 | E11.5 * Sox10 down vs E11.5 * Ctrl |
| 10578322 Pdgfrl        | NM_026840    | 0.00067926   | -1.49253 | E11.5 * Sox10 down vs E11.5 * Ctrl |
| 10435565 Hcls1         | NM_008225    | 0.00031637   | -1.49278 | E11.5 * Sox10 down vs E11.5 * Ctrl |
| 10421932 Pcdh9         | NM_001081377 | 0.00198852   | -1.49385 | E11.5 * Sox10 down vs E11.5 * Ctrl |
| 10544763 Hoxa4         | NM_008265    | 8.11447e-006 | -1.49401 | E11.5 * Sox10 down vs E11.5 * Ctrl |
| 10500938 Wnt2b         | NM_009520    | 0.000245513  | -1.49426 | E11.5 * Sox10 down vs E11.5 * Ctrl |
| 10440393 Samsn1        | NM_023380    | 1.76826e-005 | -1.49426 | E11.5 * Sox10 down vs E11.5 * Ctrl |
| 10466573 Ostf1         | NM_017375    | 0.000349524  | -1.49435 | E11.5 * Sox10 down vs E11.5 * Ctrl |
| 10380285 Tmem100       | NM_026433    | 0.0021154    | -1.49463 | E11.5 * Sox10 down vs E11.5 * Ctrl |
| 10605181 Renbp         | NM_023132    | 0.000309544  | -1.49522 | E11.5 * Sox10 down vs E11.5 * Ctrl |
| 10504375 Npr2          | NM_173788    | 0.000993267  | -1.49525 | E11.5 * Sox10 down vs E11.5 * Ctrl |
| 10372807 Msrb3         | NM_177092    | 0.000123717  | -1.4955  | E11.5 * Sox10 down vs E11.5 * Ctrl |
| 10446253 Vav1          | NM_011691    | 0.000849534  | -1.49559 | E11.5 * Sox10 down vs E11.5 * Ctrl |
| 10396778 Mpp5          | NM_019579    | 1.05221e-006 | -1.49566 | E11.5 * Sox10 down vs E11.5 * Ctrl |
| 10557853 B230325K18Rik | ENSMUST00000 | 0.000297137  | -1.49566 | E11.5 * Sox10 down vs E11.5 * Ctrl |
| 10572527 EG665858      | ENSMUST00000 | 0.0102608    | -1.49601 | E11.5 * Sox10 down vs E11.5 * Ctrl |
| 10495596 Frs1          | NM_001113478 | 0.000361185  | -1.4961  | E11.5 * Sox10 down vs E11.5 * Ctrl |
| 10458843 Sema6a        | NM_018744    | 9.04927e-006 | -1.49723 | E11.5 * Sox10 down vs E11.5 * Ctrl |
| 10508663 Lptm5         | NM_010686    | 0.00403826   | -1.49748 | E11.5 * Sox10 down vs E11.5 * Ctrl |
| 10585377               | ---          | 0.000374866  | -1.49771 | E11.5 * Sox10 down vs E11.5 * Ctrl |
| 10420747 Gata4         | NM_008092    | 8.42455e-005 | -1.49841 | E11.5 * Sox10 down vs E11.5 * Ctrl |
| 10403081 Wdr60         | NM_146039    | 1.10089e-005 | -1.49879 | E11.5 * Sox10 down vs E11.5 * Ctrl |
| 10406504 Edil3         | NM_001037987 | 0.00525303   | -1.49883 | E11.5 * Sox10 down vs E11.5 * Ctrl |
| 10410756 Ankrd32       | NM_134071    | 0.000661071  | -1.49891 | E11.5 * Sox10 down vs E11.5 * Ctrl |
| 10347291 Il8rb         | NM_009909    | 0.000298674  | -1.49898 | E11.5 * Sox10 down vs E11.5 * Ctrl |
| 10361139 Traf5         | NM_011633    | 2.75917e-005 | -1.4992  | E11.5 * Sox10 down vs E11.5 * Ctrl |
| 10497337 Car1          | NM_009799    | 0.00141641   | -1.49949 | E11.5 * Sox10 down vs E11.5 * Ctrl |
| 10366266 Pawr          | NM_054056    | 0.00503087   | -1.49949 | E11.5 * Sox10 down vs E11.5 * Ctrl |
| 10434285               | ---          | 3.32573e-005 | -1.49993 | E11.5 * Sox10 down vs E11.5 * Ctrl |
| 10433633 Mkl2          | NM_181860    | 0.000204894  | -1.49995 | E11.5 * Sox10 down vs E11.5 * Ctrl |
| 10413932 E130203B14Rik | NM_178791    | 0.000124644  | -1.50118 | E11.5 * Sox10 down vs E11.5 * Ctrl |
| 10555087               | ---          | 0.0100417    | -1.50129 | E11.5 * Sox10 down vs E11.5 * Ctrl |
| 10524312 Ttc28         | ENSMUST00000 | 8.95084e-005 | -1.50165 | E11.5 * Sox10 down vs E11.5 * Ctrl |
| 10401673 Tgfb3         | NM_009368    | 0.00291747   | -1.50208 | E11.5 * Sox10 down vs E11.5 * Ctrl |
| 10546010 Arhgap25      | NM_001037727 | 0.00194      | -1.5023  | E11.5 * Sox10 down vs E11.5 * Ctrl |
| 10547469 Hsn2          | NM_001037155 | 0.00122085   | -1.503   | E11.5 * Sox10 down vs E11.5 * Ctrl |
| 10528385 Reln          | NM_011261    | 8.23501e-006 | -1.50327 | E11.5 * Sox10 down vs E11.5 * Ctrl |
| 10562651 C330019L16Rik | NM_001034857 | 0.00231591   | -1.50373 | E11.5 * Sox10 down vs E11.5 * Ctrl |
| 10509000               | ---          | 0.000138932  | -1.50375 | E11.5 * Sox10 down vs E11.5 * Ctrl |
| 10594066 Loxl1         | NM_010729    | 0.0012122    | -1.50397 | E11.5 * Sox10 down vs E11.5 * Ctrl |
| 10506254 Raver2        | NM_183024    | 1.9836e-005  | -1.50437 | E11.5 * Sox10 down vs E11.5 * Ctrl |
| 10536505 Met           | NM_008591    | 0.000694652  | -1.50507 | E11.5 * Sox10 down vs E11.5 * Ctrl |
| 10597239 Pth1r         | NM_011199    | 2.8182e-006  | -1.50698 | E11.5 * Sox10 down vs E11.5 * Ctrl |
| 10554521 Pde8a         | NM_008803    | 0.000189264  | -1.5075  | E11.5 * Sox10 down vs E11.5 * Ctrl |
| 10402606 Rtl1          | NM_184109    | 2.62069e-005 | -1.5076  | E11.5 * Sox10 down vs E11.5 * Ctrl |
| 10434743               | ---          | 0.00174632   | -1.50771 | E11.5 * Sox10 down vs E11.5 * Ctrl |
| 10458661               | ---          | 1.59243e-005 | -1.50801 | E11.5 * Sox10 down vs E11.5 * Ctrl |
| 10448836 Tmem204       | NM_001001183 | 1.46202e-005 | -1.50802 | E11.5 * Sox10 down vs E11.5 * Ctrl |
| 10354647 Pgap1         | ENSMUST00000 | 0.00069691   | -1.50825 | E11.5 * Sox10 down vs E11.5 * Ctrl |
| 10485405 Cd44          | NM_009851    | 8.39112e-006 | -1.50999 | E11.5 * Sox10 down vs E11.5 * Ctrl |
| 10548333 Cd69          | NM_001033122 | 0.00046044   | -1.51125 | E11.5 * Sox10 down vs E11.5 * Ctrl |
| 10366293 Csrp2         | NM_007792    | 2.57634e-005 | -1.51182 | E11.5 * Sox10 down vs E11.5 * Ctrl |
| 10495449 Col11a1       | NM_007729    | 3.59168e-008 | -1.51202 | E11.5 * Sox10 down vs E11.5 * Ctrl |
| 10375358 Ebf1          | ENSMUST00000 | 0.00858366   | -1.51216 | E11.5 * Sox10 down vs E11.5 * Ctrl |
| 10559649 Cox6b2        | NM_183405    | 0.0102949    | -1.51255 | E11.5 * Sox10 down vs E11.5 * Ctrl |
| 10372280 EG628870      | XM_893664    | 1.52154e-005 | -1.51289 | E11.5 * Sox10 down vs E11.5 * Ctrl |

|          |               |              |              |          |                                    |
|----------|---------------|--------------|--------------|----------|------------------------------------|
| 10369750 | ENSMUSG00000  | ENSMUST00000 | 0.00470194   | -1.5129  | E11.5 * Sox10 down vs E11.5 * Ctrl |
| 10519811 | Speer8-ps1    | NR_001584    | 7.33395e-005 | -1.51344 | E11.5 * Sox10 down vs E11.5 * Ctrl |
| 10458875 | Dtw2          | NM_026854    | 0.00477661   | -1.51358 | E11.5 * Sox10 down vs E11.5 * Ctrl |
| 10387743 | Slc2a4        | NM_009204    | 8.65194e-006 | -1.51371 | E11.5 * Sox10 down vs E11.5 * Ctrl |
| 10493086 | Hdgf          | NM_008231    | 2.33138e-005 | -1.51399 | E11.5 * Sox10 down vs E11.5 * Ctrl |
| 10566934 | Lyve1         | NM_053247    | 0.000187269  | -1.51414 | E11.5 * Sox10 down vs E11.5 * Ctrl |
| 10407598 | Ryr2          | NM_023868    | 1.06343e-007 | -1.51495 | E11.5 * Sox10 down vs E11.5 * Ctrl |
| 10417167 | Clybl         | NM_029556    | 2.90909e-005 | -1.51511 | E11.5 * Sox10 down vs E11.5 * Ctrl |
| 10406663 | Arsb          | NM_009712    | 0.00132254   | -1.51556 | E11.5 * Sox10 down vs E11.5 * Ctrl |
| 10349102 | Bcl2          | NM_009741    | 2.18157e-005 | -1.51578 | E11.5 * Sox10 down vs E11.5 * Ctrl |
| 10566943 | Mvri1         | NM_010826    | 0.000184677  | -1.51635 | E11.5 * Sox10 down vs E11.5 * Ctrl |
| 10437160 | Ets2          | NM_011809    | 7.34981e-006 | -1.51863 | E11.5 * Sox10 down vs E11.5 * Ctrl |
| 10566333 | 9230105E10Rik | NM_001146007 | 6.61217e-007 | -1.51901 | E11.5 * Sox10 down vs E11.5 * Ctrl |
| 10554059 | ENSMUSG00000  | ENSMUST00000 | 0.000839085  | -1.51919 | E11.5 * Sox10 down vs E11.5 * Ctrl |
| 10531185 | Adams3        | NM_001081401 | 2.52573e-005 | -1.51987 | E11.5 * Sox10 down vs E11.5 * Ctrl |
| 10494351 | Mtmr11        | NM_181409    | 4.95689e-005 | -1.52145 | E11.5 * Sox10 down vs E11.5 * Ctrl |
| 10489246 | Mafb          | NM_010658    | 0.00091632   | -1.52165 | E11.5 * Sox10 down vs E11.5 * Ctrl |
| 10359624 | Prrx1         | NM_175686    | 0.0055909    | -1.5218  | E11.5 * Sox10 down vs E11.5 * Ctrl |
| 10547100 | Plxnd1        | NM_026376    | 0.000517253  | -1.52184 | E11.5 * Sox10 down vs E11.5 * Ctrl |
| 10399148 | Rapgef5       | NM_175930    | 0.000190796  | -1.52208 | E11.5 * Sox10 down vs E11.5 * Ctrl |
| 10421911 | Pcdh20        | NM_178685    | 0.00555406   | -1.52279 | E11.5 * Sox10 down vs E11.5 * Ctrl |
| 10410475 | BC018507      | ENSMUST00000 | 8.10731e-007 | -1.52292 | E11.5 * Sox10 down vs E11.5 * Ctrl |
| 10547769 | Ptpn6         | NM_013545    | 3.22824e-006 | -1.52306 | E11.5 * Sox10 down vs E11.5 * Ctrl |
| 10406551 | Ssbp2         | NM_024272    | 5.14236e-008 | -1.52316 | E11.5 * Sox10 down vs E11.5 * Ctrl |
| 10414102 | Mmrn2         | NM_153127    | 0.00145697   | -1.52369 | E11.5 * Sox10 down vs E11.5 * Ctrl |
| 10447317 | Epas1         | NM_010137    | 0.000998336  | -1.52379 | E11.5 * Sox10 down vs E11.5 * Ctrl |
| 10491625 | 4932438A13Rik | NM_172679    | 0.000591435  | -1.52478 | E11.5 * Sox10 down vs E11.5 * Ctrl |
| 10456329 | 5330437I02Rik | NM_177028    | 0.000133844  | -1.52637 | E11.5 * Sox10 down vs E11.5 * Ctrl |
| 10598586 | Xk            | NM_023500    | 4.59397e-005 | -1.52705 | E11.5 * Sox10 down vs E11.5 * Ctrl |
| 10369702 | Tet1          | ENSMUST00000 | 2.55109e-006 | -1.52887 | E11.5 * Sox10 down vs E11.5 * Ctrl |
| 10439058 | Lrrc33        | NM_146069    | 3.63968e-005 | -1.52901 | E11.5 * Sox10 down vs E11.5 * Ctrl |
| 10397975 | Ifi2711       | NM_026790    | 3.35703e-005 | -1.52923 | E11.5 * Sox10 down vs E11.5 * Ctrl |
| 10420216 | Sdr39u1       | NM_001082975 | 0.000484192  | -1.52947 | E11.5 * Sox10 down vs E11.5 * Ctrl |
| 10369171 | 9530009G21Rik | AK156585     | 0.00119181   | -1.53012 | E11.5 * Sox10 down vs E11.5 * Ctrl |
| 10500911 | Mov10         | NM_008619    | 3.65422e-005 | -1.53043 | E11.5 * Sox10 down vs E11.5 * Ctrl |
| 10395293 | Atxn7l1       | NM_001033436 | 6.34362e-006 | -1.53177 | E11.5 * Sox10 down vs E11.5 * Ctrl |
| 10405058 | Omd           | NM_012050    | 0.00117602   | -1.53192 | E11.5 * Sox10 down vs E11.5 * Ctrl |
| 10561212 | Ltbp4         | NM_175641    | 4.48955e-005 | -1.53212 | E11.5 * Sox10 down vs E11.5 * Ctrl |
| 10504123 | 4933409K07Rik | BC059060     | 0.00323382   | -1.53233 | E11.5 * Sox10 down vs E11.5 * Ctrl |
| 10504125 | 4933409K07Rik | BC059060     | 0.00323382   | -1.53233 | E11.5 * Sox10 down vs E11.5 * Ctrl |
| 10476299 | ---           | ---          | 0.00709132   | -1.53278 | E11.5 * Sox10 down vs E11.5 * Ctrl |
| 10354368 | Col5a2        | BC055077     | 1.50431e-005 | -1.533   | E11.5 * Sox10 down vs E11.5 * Ctrl |
| 10459227 | ---           | ---          | 0.00215404   | -1.53371 | E11.5 * Sox10 down vs E11.5 * Ctrl |
| 10595718 | Chst2         | NM_018763    | 4.56037e-005 | -1.53382 | E11.5 * Sox10 down vs E11.5 * Ctrl |
| 10454601 | Tslp          | NM_021367    | 1.3673e-005  | -1.53461 | E11.5 * Sox10 down vs E11.5 * Ctrl |
| 10398428 | ---           | ---          | 5.43264e-005 | -1.53469 | E11.5 * Sox10 down vs E11.5 * Ctrl |
| 10492957 | Cd1d2         | NM_007640    | 5.8062e-006  | -1.53514 | E11.5 * Sox10 down vs E11.5 * Ctrl |
| 10358408 | Rgs1          | NM_015811    | 0.00821725   | -1.53516 | E11.5 * Sox10 down vs E11.5 * Ctrl |
| 10495967 | Tifa          | NM_145133    | 1.24337e-005 | -1.53604 | E11.5 * Sox10 down vs E11.5 * Ctrl |
| 10579012 | Csgalnact1    | NM_172753    | 0.000356065  | -1.5362  | E11.5 * Sox10 down vs E11.5 * Ctrl |
| 10423024 | Capsl         | NM_029341    | 0.000491501  | -1.53666 | E11.5 * Sox10 down vs E11.5 * Ctrl |
| 10406982 | Adams6        | NM_001081020 | 0.000289898  | -1.53729 | E11.5 * Sox10 down vs E11.5 * Ctrl |
| 10544788 | Hoxa9         | NM_010456    | 0.000182465  | -1.53763 | E11.5 * Sox10 down vs E11.5 * Ctrl |
| 10457587 | Zfp521        | NM_145492    | 4.03613e-007 | -1.53788 | E11.5 * Sox10 down vs E11.5 * Ctrl |
| 10507101 | OTTMUSG00000  | NM_001085549 | 1.52349e-005 | -1.53817 | E11.5 * Sox10 down vs E11.5 * Ctrl |
| 10462132 | E030010A14Rik | NM_183160    | 2.25575e-006 | -1.53875 | E11.5 * Sox10 down vs E11.5 * Ctrl |
| 10432636 | BC004728      | NM_174992    | 0.000119459  | -1.53932 | E11.5 * Sox10 down vs E11.5 * Ctrl |
| 10381122 | Fkbp10        | NM_010221    | 0.000114128  | -1.53983 | E11.5 * Sox10 down vs E11.5 * Ctrl |
| 10428536 | Trps1         | NM_032000    | 2.6542e-005  | -1.54086 | E11.5 * Sox10 down vs E11.5 * Ctrl |
| 10447848 | Mas1          | NM_008552    | 0.000194263  | -1.54174 | E11.5 * Sox10 down vs E11.5 * Ctrl |
| 10499536 | Efna1         | NM_010107    | 2.23433e-006 | -1.54191 | E11.5 * Sox10 down vs E11.5 * Ctrl |
| 10423230 | Cdh9          | NM_009869    | 3.59552e-005 | -1.54215 | E11.5 * Sox10 down vs E11.5 * Ctrl |
| 10428534 | Trps1         | NM_032000    | 3.04659e-005 | -1.54269 | E11.5 * Sox10 down vs E11.5 * Ctrl |
| 10544538 | ---           | ---          | 0.00993053   | -1.54284 | E11.5 * Sox10 down vs E11.5 * Ctrl |
| 10344809 | Cspp1         | NM_026493    | 0.00910289   | -1.54303 | E11.5 * Sox10 down vs E11.5 * Ctrl |
| 10527051 | Sdk1          | NM_177879    | 3.4487e-005  | -1.54328 | E11.5 * Sox10 down vs E11.5 * Ctrl |

|          |               |              |              |          |                                    |
|----------|---------------|--------------|--------------|----------|------------------------------------|
| 10419156 | Ear10         | NM_053112    | 3.19195e-005 | -1.54335 | E11.5 * Sox10 down vs E11.5 * Ctrl |
| 10547322 | Cacna1c       | NM_001159533 | 1.10687e-007 | -1.54364 | E11.5 * Sox10 down vs E11.5 * Ctrl |
| 10380859 | Crkrs         | BC057057     | 0.00170005   | -1.54377 | E11.5 * Sox10 down vs E11.5 * Ctrl |
| 10412298 | Itga1         | NM_001033228 | 0.00566479   | -1.54435 | E11.5 * Sox10 down vs E11.5 * Ctrl |
| 10555862 | Trim34        | NM_030684    | 9.86473e-005 | -1.54449 | E11.5 * Sox10 down vs E11.5 * Ctrl |
| 10428517 | Csmd3         | NM_001081391 | 4.76204e-005 | -1.54486 | E11.5 * Sox10 down vs E11.5 * Ctrl |
| 10443980 | Myo1f         | NM_053214    | 0.00142581   | -1.54517 | E11.5 * Sox10 down vs E11.5 * Ctrl |
| 10538802 | A930038C07Rik | NM_172399    | 0.000415819  | -1.54536 | E11.5 * Sox10 down vs E11.5 * Ctrl |
| 10405733 | EG630579      | NM_001039239 | 0.000431037  | -1.54554 | E11.5 * Sox10 down vs E11.5 * Ctrl |
| 10424543 | Wisp1         | NM_018865    | 0.00022276   | -1.54681 | E11.5 * Sox10 down vs E11.5 * Ctrl |
| 10496862 | ---           | ---          | 6.48723e-006 | -1.54731 | E11.5 * Sox10 down vs E11.5 * Ctrl |
| 10466530 | Pcsk5         | BC013068     | 7.17005e-006 | -1.54757 | E11.5 * Sox10 down vs E11.5 * Ctrl |
| 10439016 | 4930444G20Rik | NM_053264    | 0.00970337   | -1.54767 | E11.5 * Sox10 down vs E11.5 * Ctrl |
| 10534493 | Ccl24         | NM_019577    | 0.00034229   | -1.54834 | E11.5 * Sox10 down vs E11.5 * Ctrl |
| 10431749 | Adamts20      | NM_177431    | 2.28583e-005 | -1.55102 | E11.5 * Sox10 down vs E11.5 * Ctrl |
| 10372988 | Slc16a7       | NM_011391    | 0.00021869   | -1.55139 | E11.5 * Sox10 down vs E11.5 * Ctrl |
| 10436519 | Robo1         | NM_019413    | 1.39243e-006 | -1.55239 | E11.5 * Sox10 down vs E11.5 * Ctrl |
| 10406276 | ---           | ---          | 0.00259058   | -1.55254 | E11.5 * Sox10 down vs E11.5 * Ctrl |
| 10359419 | ---           | ---          | 0.00201823   | -1.55322 | E11.5 * Sox10 down vs E11.5 * Ctrl |
| 10419559 | Rnase12       | NM_001011875 | 8.55012e-005 | -1.55398 | E11.5 * Sox10 down vs E11.5 * Ctrl |
| 10362615 | Traf3ip2      | NM_134000    | 2.10186e-006 | -1.55493 | E11.5 * Sox10 down vs E11.5 * Ctrl |
| 10434778 | Rtp4          | NM_023386    | 0.000105506  | -1.55566 | E11.5 * Sox10 down vs E11.5 * Ctrl |
| 10355227 | 1110028C15Rik | NM_001122738 | 1.42242e-005 | -1.55567 | E11.5 * Sox10 down vs E11.5 * Ctrl |
| 10372844 | Rassf3        | NM_138956    | 9.20468e-005 | -1.55682 | E11.5 * Sox10 down vs E11.5 * Ctrl |
| 10554156 | Fam174b       | ENSMUST00000 | 8.1737e-006  | -1.55689 | E11.5 * Sox10 down vs E11.5 * Ctrl |
| 10491627 | 4932438A13Rik | NM_172679    | 0.000564813  | -1.55725 | E11.5 * Sox10 down vs E11.5 * Ctrl |
| 10580349 | Mylk3         | NM_175441    | 3.89584e-005 | -1.55754 | E11.5 * Sox10 down vs E11.5 * Ctrl |
| 10554599 | Adamts13      | ENSMUST00000 | 0.000164468  | -1.55758 | E11.5 * Sox10 down vs E11.5 * Ctrl |
| 10447602 | Ezr           | NM_009510    | 2.40671e-005 | -1.55889 | E11.5 * Sox10 down vs E11.5 * Ctrl |
| 10462140 | Dock8         | NM_028785    | 0.000240419  | -1.55938 | E11.5 * Sox10 down vs E11.5 * Ctrl |
| 10500283 | Car14         | NM_011797    | 8.31747e-005 | -1.55976 | E11.5 * Sox10 down vs E11.5 * Ctrl |
| 10537880 | ---           | ---          | 6.04106e-005 | -1.55991 | E11.5 * Sox10 down vs E11.5 * Ctrl |
| 10600169 | Bgn           | NM_007542    | 4.51056e-006 | -1.56171 | E11.5 * Sox10 down vs E11.5 * Ctrl |
| 10410766 | Nr2f1         | NM_010151    | 9.15568e-008 | -1.56276 | E11.5 * Sox10 down vs E11.5 * Ctrl |
| 10549102 | Kcnj8         | NM_008428    | 0.0055625    | -1.56305 | E11.5 * Sox10 down vs E11.5 * Ctrl |
| 10368585 | Nkain2        | NM_001013411 | 0.000145209  | -1.56324 | E11.5 * Sox10 down vs E11.5 * Ctrl |
| 10551185 | Tgfb1         | NM_011577    | 3.62768e-005 | -1.56346 | E11.5 * Sox10 down vs E11.5 * Ctrl |
| 10531179 | Adamts3       | NM_001081401 | 0.000395261  | -1.56358 | E11.5 * Sox10 down vs E11.5 * Ctrl |
| 10498166 | ENSMUSG0000C  | ENSMUST00000 | 0.00447311   | -1.56369 | E11.5 * Sox10 down vs E11.5 * Ctrl |
| 10532741 | Tmem119       | NM_146162    | 0.000139136  | -1.56401 | E11.5 * Sox10 down vs E11.5 * Ctrl |
| 10594840 | Gcom1         | NM_001033208 | 7.1954e-005  | -1.5641  | E11.5 * Sox10 down vs E11.5 * Ctrl |
| 10554074 | Adamts17      | NM_001033877 | 0.00253857   | -1.56411 | E11.5 * Sox10 down vs E11.5 * Ctrl |
| 10482301 | A930041I02Rik | NM_178778    | 1.43821e-005 | -1.56442 | E11.5 * Sox10 down vs E11.5 * Ctrl |
| 10381898 | Mrc2          | NM_008626    | 0.000323929  | -1.56444 | E11.5 * Sox10 down vs E11.5 * Ctrl |
| 10553788 | Atp10a        | NM_009728    | 2.34851e-007 | -1.5645  | E11.5 * Sox10 down vs E11.5 * Ctrl |
| 10366196 | Ppfia2        | NM_177373    | 8.01528e-006 | -1.56583 | E11.5 * Sox10 down vs E11.5 * Ctrl |
| 10601270 | ENSMUSG0000C  | ENSMUST00000 | 0.00013308   | -1.56707 | E11.5 * Sox10 down vs E11.5 * Ctrl |
| 10560624 | Apoe          | NM_009696    | 4.07583e-006 | -1.568   | E11.5 * Sox10 down vs E11.5 * Ctrl |
| 10528804 | ENSMUSG0000C  | NM_001134299 | 9.20122e-006 | -1.56813 | E11.5 * Sox10 down vs E11.5 * Ctrl |
| 10602385 | Pfkfb1        | NM_008824    | 0.00308547   | -1.56818 | E11.5 * Sox10 down vs E11.5 * Ctrl |
| 10542164 | Clec12a       | NM_177686    | 4.15411e-005 | -1.56902 | E11.5 * Sox10 down vs E11.5 * Ctrl |
| 10493449 | Thbs3         | NM_013691    | 8.26232e-008 | -1.56937 | E11.5 * Sox10 down vs E11.5 * Ctrl |
| 10469457 | Plxdc2        | NM_026162    | 1.66769e-007 | -1.57013 | E11.5 * Sox10 down vs E11.5 * Ctrl |
| 10367591 | Myct1         | NM_026793    | 0.00211407   | -1.57028 | E11.5 * Sox10 down vs E11.5 * Ctrl |
| 10407124 | Al452195      | ENSMUST00000 | 0.00766118   | -1.57054 | E11.5 * Sox10 down vs E11.5 * Ctrl |
| 10588786 | Ube1l         | NM_023738    | 6.8556e-006  | -1.57061 | E11.5 * Sox10 down vs E11.5 * Ctrl |
| 10499113 | Gm1019        | NM_001001650 | 2.75977e-006 | -1.57089 | E11.5 * Sox10 down vs E11.5 * Ctrl |
| 10408574 | ---           | ---          | 4.15372e-005 | -1.57095 | E11.5 * Sox10 down vs E11.5 * Ctrl |
| 10365845 | Fgd6          | NM_053072    | 6.07715e-006 | -1.57168 | E11.5 * Sox10 down vs E11.5 * Ctrl |
| 10490777 | Zfhx4         | NM_030708    | 2.50058e-007 | -1.57197 | E11.5 * Sox10 down vs E11.5 * Ctrl |
| 10466248 | Stx3          | NM_001025307 | 4.33023e-006 | -1.57255 | E11.5 * Sox10 down vs E11.5 * Ctrl |
| 10523727 | Pkd2          | NM_008861    | 3.0233e-007  | -1.5727  | E11.5 * Sox10 down vs E11.5 * Ctrl |
| 10459071 | 2010002N04Rik | NM_134133    | 3.10399e-005 | -1.57287 | E11.5 * Sox10 down vs E11.5 * Ctrl |
| 10469167 | Sfmbt2        | NM_177386    | 3.31946e-010 | -1.57303 | E11.5 * Sox10 down vs E11.5 * Ctrl |
| 10519913 | Magi2         | NM_015823    | 0.00032236   | -1.57333 | E11.5 * Sox10 down vs E11.5 * Ctrl |
| 10476560 | lsm1          | NM_001126490 | 0.000236948  | -1.57339 | E11.5 * Sox10 down vs E11.5 * Ctrl |

|                        |              |              |          |                                    |
|------------------------|--------------|--------------|----------|------------------------------------|
| 10607924 Amelx         | NM_001081978 | 2.07725e-005 | -1.57505 | E11.5 * Sox10 down vs E11.5 * Ctrl |
| 10436602               | ---          | 0.00336419   | -1.5754  | E11.5 * Sox10 down vs E11.5 * Ctrl |
| 10531972 5830443L24Rik | NM_029509    | 7.16973e-005 | -1.57574 | E11.5 * Sox10 down vs E11.5 * Ctrl |
| 10541555 Clec4a1       | NM_199311    | 0.00087557   | -1.57726 | E11.5 * Sox10 down vs E11.5 * Ctrl |
| 10403871 Aoah          | NM_012054    | 1.21068e-005 | -1.58278 | E11.5 * Sox10 down vs E11.5 * Ctrl |
| 10380419 Col1a1        | NM_007742    | 5.62304e-008 | -1.58308 | E11.5 * Sox10 down vs E11.5 * Ctrl |
| 10584208 Cdon          | NM_021339    | 4.06292e-008 | -1.58351 | E11.5 * Sox10 down vs E11.5 * Ctrl |
| 10354247 Fhl2          | NM_010212    | 1.3967e-005  | -1.58447 | E11.5 * Sox10 down vs E11.5 * Ctrl |
| 10530641 Usp46         | NM_177561    | 0.000682549  | -1.58466 | E11.5 * Sox10 down vs E11.5 * Ctrl |
| 10501222 Gstm2         | NM_008183    | 0.000524315  | -1.58489 | E11.5 * Sox10 down vs E11.5 * Ctrl |
| 10515803 1110020C03Rik | BC062805     | 1.51042e-005 | -1.58492 | E11.5 * Sox10 down vs E11.5 * Ctrl |
| 10458999 Fbn2          | NM_010181    | 7.03875e-006 | -1.58517 | E11.5 * Sox10 down vs E11.5 * Ctrl |
| 10507137 Pdzk1ip1      | NM_026018    | 9.58236e-007 | -1.58517 | E11.5 * Sox10 down vs E11.5 * Ctrl |
| 10427303 Hoxc4         | NM_013553    | 4.28389e-005 | -1.5861  | E11.5 * Sox10 down vs E11.5 * Ctrl |
| 10400483 Slc25a21      | NM_172577    | 6.65816e-006 | -1.58623 | E11.5 * Sox10 down vs E11.5 * Ctrl |
| 10385903 Pdlim4        | NM_019417    | 2.15933e-006 | -1.58724 | E11.5 * Sox10 down vs E11.5 * Ctrl |
| 10561453 Zfp36         | NM_011756    | 0.000480225  | -1.58757 | E11.5 * Sox10 down vs E11.5 * Ctrl |
| 10526211               | ---          | 0.00607682   | -1.58759 | E11.5 * Sox10 down vs E11.5 * Ctrl |
| 10531610 Rasgef1b      | NM_145839    | 0.000391547  | -1.58786 | E11.5 * Sox10 down vs E11.5 * Ctrl |
| 10513154 Ptpn3         | NM_011207    | 0.000638585  | -1.58889 | E11.5 * Sox10 down vs E11.5 * Ctrl |
| 10542172 Clec1b        | NM_019985    | 5.86754e-006 | -1.58929 | E11.5 * Sox10 down vs E11.5 * Ctrl |
| 10498379               | ---          | 0.000309293  | -1.58965 | E11.5 * Sox10 down vs E11.5 * Ctrl |
| 10493307               | ---          | 0.00533228   | -1.58985 | E11.5 * Sox10 down vs E11.5 * Ctrl |
| 10433075 5730585A16Rik | ENSMUST00000 | 0.00678208   | -1.58991 | E11.5 * Sox10 down vs E11.5 * Ctrl |
| 10354003 Mgat4a        | NM_173870    | 0.00405996   | -1.59033 | E11.5 * Sox10 down vs E11.5 * Ctrl |
| 10531980 BC057170      | NM_172777    | 0.000441847  | -1.59068 | E11.5 * Sox10 down vs E11.5 * Ctrl |
| 10472240 Tanc1         | NM_198294    | 1.12374e-007 | -1.59146 | E11.5 * Sox10 down vs E11.5 * Ctrl |
| 10482918               | ---          | 0.00258521   | -1.59153 | E11.5 * Sox10 down vs E11.5 * Ctrl |
| 10587659 EG547109      | NM_001034906 | 0.000374853  | -1.59176 | E11.5 * Sox10 down vs E11.5 * Ctrl |
| 10439126               | ---          | 7.68445e-005 | -1.59396 | E11.5 * Sox10 down vs E11.5 * Ctrl |
| 10423796               | ---          | 0.00961877   | -1.59423 | E11.5 * Sox10 down vs E11.5 * Ctrl |
| 10519324 Cdk6          | NM_009873    | 1.9169e-006  | -1.59425 | E11.5 * Sox10 down vs E11.5 * Ctrl |
| 10549162 St8sia1       | NM_011374    | 2.33361e-005 | -1.59453 | E11.5 * Sox10 down vs E11.5 * Ctrl |
| 10456437               | ---          | 0.0023751    | -1.59472 | E11.5 * Sox10 down vs E11.5 * Ctrl |
| 10360382 Ifi204        | NM_008329    | 0.00427868   | -1.59506 | E11.5 * Sox10 down vs E11.5 * Ctrl |
| 10546510 Lrig1         | NM_008377    | 1.27434e-005 | -1.59649 | E11.5 * Sox10 down vs E11.5 * Ctrl |
| 10568024 Coro1a        | NM_009898    | 3.75236e-006 | -1.59709 | E11.5 * Sox10 down vs E11.5 * Ctrl |
| 10563893 ENSMUSG00000  | ENSMUST00000 | 0.00770169   | -1.59778 | E11.5 * Sox10 down vs E11.5 * Ctrl |
| 10599598 A630012P03Rik | ENSMUST00000 | 1.56416e-005 | -1.598   | E11.5 * Sox10 down vs E11.5 * Ctrl |
| 10405063 Ogn           | NM_008760    | 2.52392e-005 | -1.59833 | E11.5 * Sox10 down vs E11.5 * Ctrl |
| 10445944 St6gal2       | NM_172829    | 0.000774711  | -1.5986  | E11.5 * Sox10 down vs E11.5 * Ctrl |
| 10536220 Col1a2        | NM_007743    | 4.01768e-007 | -1.59863 | E11.5 * Sox10 down vs E11.5 * Ctrl |
| 10586722 F830001A07Rik | AK045567     | 0.000777521  | -1.59868 | E11.5 * Sox10 down vs E11.5 * Ctrl |
| 10383233 Rnf213        | AK173199     | 0.00183678   | -1.59881 | E11.5 * Sox10 down vs E11.5 * Ctrl |
| 10469695 Apbb1ip       | NM_019456    | 1.42066e-005 | -1.59922 | E11.5 * Sox10 down vs E11.5 * Ctrl |
| 10604956               | ---          | 6.71156e-005 | -1.59949 | E11.5 * Sox10 down vs E11.5 * Ctrl |
| 10563441 Emp3          | NM_010129    | 0.000125527  | -1.59961 | E11.5 * Sox10 down vs E11.5 * Ctrl |
| 10575976 Crisp1d2      | NM_030209    | 2.5547e-005  | -1.59978 | E11.5 * Sox10 down vs E11.5 * Ctrl |
| 10380135               | ---          | 0.000202103  | -1.60025 | E11.5 * Sox10 down vs E11.5 * Ctrl |
| 10472962 Hoxd9         | NM_013555    | 0.00136729   | -1.60038 | E11.5 * Sox10 down vs E11.5 * Ctrl |
| 10479397 Ntsr1         | NM_018766    | 0.000348399  | -1.601   | E11.5 * Sox10 down vs E11.5 * Ctrl |
| 10409059               | ---          | 0.000125384  | -1.60237 | E11.5 * Sox10 down vs E11.5 * Ctrl |
| 10398319 Dlk1          | NM_010052    | 0.00262285   | -1.60318 | E11.5 * Sox10 down vs E11.5 * Ctrl |
| 10376245 Gria1         | NM_001113325 | 3.56764e-007 | -1.60323 | E11.5 * Sox10 down vs E11.5 * Ctrl |
| 10607943               | ---          | 5.47804e-005 | -1.60329 | E11.5 * Sox10 down vs E11.5 * Ctrl |
| 10398326 Meg3          | NR_003633    | 0.000171402  | -1.60451 | E11.5 * Sox10 down vs E11.5 * Ctrl |
| 10365574 Pmch          | NM_029971    | 0.00185631   | -1.60642 | E11.5 * Sox10 down vs E11.5 * Ctrl |
| 10583870 Bmper         | NM_028472    | 4.12511e-006 | -1.60719 | E11.5 * Sox10 down vs E11.5 * Ctrl |
| 10361790 Fuca2         | NM_025799    | 1.74783e-005 | -1.6102  | E11.5 * Sox10 down vs E11.5 * Ctrl |
| 10455128 Pcdhb20       | NM_053145    | 0.00157501   | -1.61039 | E11.5 * Sox10 down vs E11.5 * Ctrl |
| 10372618 Frs2          | NM_177798    | 1.51093e-005 | -1.61065 | E11.5 * Sox10 down vs E11.5 * Ctrl |
| 10531193 Adamts3       | NM_001081401 | 0.00034536   | -1.61142 | E11.5 * Sox10 down vs E11.5 * Ctrl |
| 10389929 Cacna1g       | NM_009783    | 1.11836e-005 | -1.61148 | E11.5 * Sox10 down vs E11.5 * Ctrl |
| 10366052 Kitl          | NM_013598    | 1.75595e-005 | -1.61169 | E11.5 * Sox10 down vs E11.5 * Ctrl |
| 10474201 Lmo2          | NM_008505    | 8.9292e-006  | -1.61243 | E11.5 * Sox10 down vs E11.5 * Ctrl |
| 10398907 Pld4          | NM_178911    | 4.67202e-006 | -1.61248 | E11.5 * Sox10 down vs E11.5 * Ctrl |

|          |               |              |              |          |                                    |
|----------|---------------|--------------|--------------|----------|------------------------------------|
| 10365991 | Epyc          | NM_007884    | 1.24308e-005 | -1.61281 | E11.5 * Sox10 down vs E11.5 * Ctrl |
| 10435305 | Itgb5         | NM_001145884 | 1.19808e-007 | -1.61415 | E11.5 * Sox10 down vs E11.5 * Ctrl |
| 10474700 | Thbs1         | NM_011580    | 9.29165e-006 | -1.6143  | E11.5 * Sox10 down vs E11.5 * Ctrl |
| 10531183 | Adamts3       | NM_001081401 | 4.78609e-005 | -1.61457 | E11.5 * Sox10 down vs E11.5 * Ctrl |
| 10434741 | ---           | ---          | 0.00268342   | -1.61508 | E11.5 * Sox10 down vs E11.5 * Ctrl |
| 10395428 | Dgkb          | NM_178681    | 0.00012767   | -1.6154  | E11.5 * Sox10 down vs E11.5 * Ctrl |
| 10362102 | ENSMUSG0000C  | ENSMUST00000 | 6.8693e-005  | -1.61546 | E11.5 * Sox10 down vs E11.5 * Ctrl |
| 10519484 | Steap2        | AK141701     | 0.000434745  | -1.61546 | E11.5 * Sox10 down vs E11.5 * Ctrl |
| 10346607 | Fzd7          | NM_008057    | 3.9835e-008  | -1.61563 | E11.5 * Sox10 down vs E11.5 * Ctrl |
| 10607658 | Reps2         | NM_178256    | 4.95088e-005 | -1.61628 | E11.5 * Sox10 down vs E11.5 * Ctrl |
| 10541491 | 1700063H04Rik | ENSMUST00000 | 1.47466e-006 | -1.61647 | E11.5 * Sox10 down vs E11.5 * Ctrl |
| 10375055 | F830116E18Rik | NM_001033981 | 0.00107417   | -1.6171  | E11.5 * Sox10 down vs E11.5 * Ctrl |
| 10528821 | ENSMUSG0000C  | NM_001134299 | 1.38161e-006 | -1.61758 | E11.5 * Sox10 down vs E11.5 * Ctrl |
| 10350516 | Ptgs2         | NM_011198    | 0.00426171   | -1.61836 | E11.5 * Sox10 down vs E11.5 * Ctrl |
| 10401068 | Spnb1         | NM_013675    | 1.67997e-006 | -1.61861 | E11.5 * Sox10 down vs E11.5 * Ctrl |
| 10383198 | ---           | ---          | 0.000670212  | -1.62049 | E11.5 * Sox10 down vs E11.5 * Ctrl |
| 10455071 | Pcdhb7        | NM_053132    | 0.00027178   | -1.62212 | E11.5 * Sox10 down vs E11.5 * Ctrl |
| 10478928 | Tshz2         | NM_080455    | 1.7182e-008  | -1.62301 | E11.5 * Sox10 down vs E11.5 * Ctrl |
| 10436196 | ---           | ---          | 1.38601e-005 | -1.62322 | E11.5 * Sox10 down vs E11.5 * Ctrl |
| 10397715 | ---           | ---          | 0.0011759    | -1.62514 | E11.5 * Sox10 down vs E11.5 * Ctrl |
| 10468691 | Ablim1        | NM_178688    | 8.2482e-007  | -1.62523 | E11.5 * Sox10 down vs E11.5 * Ctrl |
| 10355806 | Tuba4a        | NM_009447    | 9.96669e-006 | -1.6274  | E11.5 * Sox10 down vs E11.5 * Ctrl |
| 10474419 | Lgr4          | NM_172671    | 1.33606e-005 | -1.6277  | E11.5 * Sox10 down vs E11.5 * Ctrl |
| 10385883 | Slc22a21      | NM_019723    | 8.52215e-005 | -1.6283  | E11.5 * Sox10 down vs E11.5 * Ctrl |
| 10560242 | C5ar1         | NM_007577    | 0.000725992  | -1.63011 | E11.5 * Sox10 down vs E11.5 * Ctrl |
| 10463263 | Lztlf1        | NM_033322    | 0.000631176  | -1.63016 | E11.5 * Sox10 down vs E11.5 * Ctrl |
| 10482866 | Tanc1         | NM_198294    | 1.74614e-006 | -1.63128 | E11.5 * Sox10 down vs E11.5 * Ctrl |
| 10495830 | Sec24d        | NM_027135    | 1.30124e-005 | -1.6323  | E11.5 * Sox10 down vs E11.5 * Ctrl |
| 10483110 | Ifih1         | NM_027835    | 1.1349e-005  | -1.63267 | E11.5 * Sox10 down vs E11.5 * Ctrl |
| 10362811 | Sesn1         | NM_001013370 | 1.15995e-006 | -1.63272 | E11.5 * Sox10 down vs E11.5 * Ctrl |
| 10559558 | Tnni3         | NM_009406    | 1.29316e-006 | -1.63273 | E11.5 * Sox10 down vs E11.5 * Ctrl |
| 10511333 | Plag1         | NM_019969    | 0.00010762   | -1.6343  | E11.5 * Sox10 down vs E11.5 * Ctrl |
| 10497051 | Negr1         | NM_001039094 | 0.000179179  | -1.63431 | E11.5 * Sox10 down vs E11.5 * Ctrl |
| 10547621 | Apobec1       | NM_031159    | 3.29779e-007 | -1.6354  | E11.5 * Sox10 down vs E11.5 * Ctrl |
| 10474642 | BC052040      | NM_001145898 | 2.62723e-005 | -1.63622 | E11.5 * Sox10 down vs E11.5 * Ctrl |
| 10531195 | Adamts3       | NM_001081401 | 0.0089403    | -1.63678 | E11.5 * Sox10 down vs E11.5 * Ctrl |
| 10491601 | 4932438A13Rik | NM_172679    | 0.00556376   | -1.63687 | E11.5 * Sox10 down vs E11.5 * Ctrl |
| 10467068 | Sgms1         | NM_144792    | 3.80362e-006 | -1.63738 | E11.5 * Sox10 down vs E11.5 * Ctrl |
| 10599696 | Ddx26b        | NM_172779    | 2.89596e-005 | -1.63847 | E11.5 * Sox10 down vs E11.5 * Ctrl |
| 10422844 | Gdnf          | NM_010275    | 6.51268e-006 | -1.63879 | E11.5 * Sox10 down vs E11.5 * Ctrl |
| 10554140 | Zic4          | BC116191     | 3.16224e-006 | -1.64066 | E11.5 * Sox10 down vs E11.5 * Ctrl |
| 10392177 | Icam2         | NM_010494    | 1.18973e-006 | -1.64069 | E11.5 * Sox10 down vs E11.5 * Ctrl |
| 10452980 | Eif2ak2       | NM_011163    | 0.000139975  | -1.64069 | E11.5 * Sox10 down vs E11.5 * Ctrl |
| 10591114 | Fat3          | NM_001080814 | 0.00105773   | -1.64125 | E11.5 * Sox10 down vs E11.5 * Ctrl |
| 10555323 | P4ha3         | NM_177161    | 9.83717e-005 | -1.64362 | E11.5 * Sox10 down vs E11.5 * Ctrl |
| 10464107 | Ppnr          | X65588       | 0.000134622  | -1.6439  | E11.5 * Sox10 down vs E11.5 * Ctrl |
| 10368720 | Slc16a10      | NM_001114332 | 4.76335e-008 | -1.64545 | E11.5 * Sox10 down vs E11.5 * Ctrl |
| 10455123 | Pcdhb19       | NM_053144    | 0.000140904  | -1.64573 | E11.5 * Sox10 down vs E11.5 * Ctrl |
| 10541564 | Clec4a3       | NM_153197    | 2.69381e-005 | -1.64949 | E11.5 * Sox10 down vs E11.5 * Ctrl |
| 10385118 | Dock2         | NM_033374    | 0.00010808   | -1.65032 | E11.5 * Sox10 down vs E11.5 * Ctrl |
| 10586454 | D030028M11Rik | AK050877     | 3.46615e-005 | -1.65157 | E11.5 * Sox10 down vs E11.5 * Ctrl |
| 10600326 | Tktl1         | NM_031379    | 0.00127634   | -1.65427 | E11.5 * Sox10 down vs E11.5 * Ctrl |
| 10473022 | Plp2          | NM_019755    | 0.000625174  | -1.65447 | E11.5 * Sox10 down vs E11.5 * Ctrl |
| 10541587 | Clec4a2       | NM_011999    | 0.000478213  | -1.65552 | E11.5 * Sox10 down vs E11.5 * Ctrl |
| 10521616 | C1qtnf7       | NM_001135172 | 7.00975e-006 | -1.65565 | E11.5 * Sox10 down vs E11.5 * Ctrl |
| 10395606 | ENSMUSG0000C  | ENSMUST00000 | 0.000679902  | -1.65621 | E11.5 * Sox10 down vs E11.5 * Ctrl |
| 10538715 | C130092O11Rik | BC107398     | 1.44305e-005 | -1.65707 | E11.5 * Sox10 down vs E11.5 * Ctrl |
| 10448117 | Has1          | NM_008215    | 5.91283e-005 | -1.65719 | E11.5 * Sox10 down vs E11.5 * Ctrl |
| 10589886 | 4930520O04Rik | AK040958     | 6.30066e-005 | -1.6572  | E11.5 * Sox10 down vs E11.5 * Ctrl |
| 10401149 | Plek2         | NM_013738    | 1.08492e-005 | -1.65781 | E11.5 * Sox10 down vs E11.5 * Ctrl |
| 10436449 | ---           | ---          | 2.19575e-005 | -1.65795 | E11.5 * Sox10 down vs E11.5 * Ctrl |
| 10493604 | She           | NM_172530    | 1.10903e-006 | -1.65797 | E11.5 * Sox10 down vs E11.5 * Ctrl |
| 10397575 | Nrxn3         | NM_172544    | 3.16426e-006 | -1.65827 | E11.5 * Sox10 down vs E11.5 * Ctrl |
| 10600308 | ---           | ---          | 0.00919149   | -1.65866 | E11.5 * Sox10 down vs E11.5 * Ctrl |
| 10584315 | ---           | ---          | 0.0029533    | -1.65981 | E11.5 * Sox10 down vs E11.5 * Ctrl |
| 10601880 | BC065397      | ENSMUST00000 | 0.000196475  | -1.65993 | E11.5 * Sox10 down vs E11.5 * Ctrl |

|          |               |               |              |          |                                    |
|----------|---------------|---------------|--------------|----------|------------------------------------|
| 10388958 | Evi2a         | NM_001033711  | 0.000405408  | -1.6606  | E11.5 * Sox10 down vs E11.5 * Ctrl |
| 10420668 | ---           | ---           | 0.00336355   | -1.66216 | E11.5 * Sox10 down vs E11.5 * Ctrl |
| 10422013 | Klf12         | NM_010636     | 1.17883e-005 | -1.66278 | E11.5 * Sox10 down vs E11.5 * Ctrl |
| 10409978 | EG630579      | NM_001039239  | 5.53439e-005 | -1.66329 | E11.5 * Sox10 down vs E11.5 * Ctrl |
| 10356333 | Snord82       | NR_002851     | 0.000105052  | -1.66346 | E11.5 * Sox10 down vs E11.5 * Ctrl |
| 10570634 | 4930467E23Rik | ENSMUST000000 | 0.00642825   | -1.664   | E11.5 * Sox10 down vs E11.5 * Ctrl |
| 10487011 | Gatm          | NM_025961     | 2.13449e-006 | -1.66419 | E11.5 * Sox10 down vs E11.5 * Ctrl |
| 10596115 | Ephb1         | AK082061      | 0.000118749  | -1.66485 | E11.5 * Sox10 down vs E11.5 * Ctrl |
| 10512327 | 4933409K07Rik | BC072647      | 1.53074e-006 | -1.66556 | E11.5 * Sox10 down vs E11.5 * Ctrl |
| 10440344 | Robo2         | NM_175549     | 2.47891e-005 | -1.66751 | E11.5 * Sox10 down vs E11.5 * Ctrl |
| 10435641 | Fstl1         | NM_008047     | 3.33591e-007 | -1.66837 | E11.5 * Sox10 down vs E11.5 * Ctrl |
| 10508012 | Rspo1         | NM_138683     | 5.3075e-005  | -1.66848 | E11.5 * Sox10 down vs E11.5 * Ctrl |
| 10423109 | Adamts12      | NM_175501     | 5.48025e-008 | -1.66858 | E11.5 * Sox10 down vs E11.5 * Ctrl |
| 10439710 | Phldb2        | NM_153412     | 2.37878e-009 | -1.66922 | E11.5 * Sox10 down vs E11.5 * Ctrl |
| 10408898 | ---           | ---           | 0.0004532    | -1.66947 | E11.5 * Sox10 down vs E11.5 * Ctrl |
| 10563077 | Rcn3          | NM_026555     | 0.00418298   | -1.6707  | E11.5 * Sox10 down vs E11.5 * Ctrl |
| 10562709 | Cd33          | NM_001111058  | 1.31051e-007 | -1.67165 | E11.5 * Sox10 down vs E11.5 * Ctrl |
| 10360834 | Hlx           | NM_008250     | 2.49887e-006 | -1.67184 | E11.5 * Sox10 down vs E11.5 * Ctrl |
| 10358389 | Rgs2          | NM_009061     | 2.10468e-005 | -1.67185 | E11.5 * Sox10 down vs E11.5 * Ctrl |
| 10416785 | 4930517O19Rik | ENSMUST000000 | 7.59379e-006 | -1.67209 | E11.5 * Sox10 down vs E11.5 * Ctrl |
| 10498386 | Igsf10        | ENSMUST000000 | 3.77218e-007 | -1.67243 | E11.5 * Sox10 down vs E11.5 * Ctrl |
| 10598004 | Ccr1          | NM_009912     | 5.77915e-005 | -1.67302 | E11.5 * Sox10 down vs E11.5 * Ctrl |
| 10521678 | Cd38          | NM_007646     | 6.12335e-007 | -1.67326 | E11.5 * Sox10 down vs E11.5 * Ctrl |
| 10474371 | ENSMUSG000000 | ENSMUST000000 | 7.54794e-006 | -1.67459 | E11.5 * Sox10 down vs E11.5 * Ctrl |
| 10568601 | BC002195      | BC002195      | 0.0096574    | -1.67557 | E11.5 * Sox10 down vs E11.5 * Ctrl |
| 10398338 | ---           | ---           | 0.000937242  | -1.67737 | E11.5 * Sox10 down vs E11.5 * Ctrl |
| 10439612 | Boc           | NM_172506     | 4.18472e-007 | -1.678   | E11.5 * Sox10 down vs E11.5 * Ctrl |
| 10367945 | Phactr2       | NM_001033257  | 0.000192522  | -1.67814 | E11.5 * Sox10 down vs E11.5 * Ctrl |
| 10579060 | 4930467E23Rik | ENSMUST000000 | 0.00677848   | -1.67962 | E11.5 * Sox10 down vs E11.5 * Ctrl |
| 10441093 | Erg           | NM_133659     | 5.05341e-008 | -1.67971 | E11.5 * Sox10 down vs E11.5 * Ctrl |
| 10515981 | ---           | ---           | 0.00120248   | -1.68127 | E11.5 * Sox10 down vs E11.5 * Ctrl |
| 10543791 | Podxl         | NM_013723     | 1.51474e-005 | -1.68155 | E11.5 * Sox10 down vs E11.5 * Ctrl |
| 10427280 | Hoxc10        | NM_010462     | 1.02893e-005 | -1.68195 | E11.5 * Sox10 down vs E11.5 * Ctrl |
| 10551347 | Blvrb         | NM_144923     | 3.41247e-007 | -1.68208 | E11.5 * Sox10 down vs E11.5 * Ctrl |
| 10354576 | Dnahc7a       | ENSMUST000000 | 0.00258431   | -1.68271 | E11.5 * Sox10 down vs E11.5 * Ctrl |
| 10531173 | Adamts3       | NM_001081401  | 0.000173405  | -1.68336 | E11.5 * Sox10 down vs E11.5 * Ctrl |
| 10413808 | ---           | ---           | 0.00995403   | -1.68423 | E11.5 * Sox10 down vs E11.5 * Ctrl |
| 10400170 | Prkd1         | NM_008858     | 5.41606e-006 | -1.68425 | E11.5 * Sox10 down vs E11.5 * Ctrl |
| 10483081 | Fap           | NM_007986     | 1.32966e-005 | -1.68572 | E11.5 * Sox10 down vs E11.5 * Ctrl |
| 10383204 | ---           | ---           | 0.00198087   | -1.68619 | E11.5 * Sox10 down vs E11.5 * Ctrl |
| 10404885 | Gmpr          | NM_025508     | 6.84006e-008 | -1.68684 | E11.5 * Sox10 down vs E11.5 * Ctrl |
| 10369752 | Lrrtm3        | NM_178678     | 6.54484e-005 | -1.68694 | E11.5 * Sox10 down vs E11.5 * Ctrl |
| 10434782 | Lpp           | NM_178665     | 4.35649e-006 | -1.68704 | E11.5 * Sox10 down vs E11.5 * Ctrl |
| 10361926 | Map3k5        | NM_008580     | 4.5703e-005  | -1.68917 | E11.5 * Sox10 down vs E11.5 * Ctrl |
| 10603182 | Arhgap6       | NM_009707     | 6.10847e-005 | -1.69012 | E11.5 * Sox10 down vs E11.5 * Ctrl |
| 10548139 | ---           | ---           | 1.05813e-005 | -1.69055 | E11.5 * Sox10 down vs E11.5 * Ctrl |
| 10361186 | Sertad4       | NM_198247     | 1.11887e-007 | -1.69084 | E11.5 * Sox10 down vs E11.5 * Ctrl |
| 10497265 | Fabp4         | NM_024406     | 0.00143297   | -1.69088 | E11.5 * Sox10 down vs E11.5 * Ctrl |
| 10600355 | Snora70       | NR_002899     | 2.92286e-007 | -1.69159 | E11.5 * Sox10 down vs E11.5 * Ctrl |
| 10463875 | Sorcs3        | NM_025696     | 6.73594e-006 | -1.69262 | E11.5 * Sox10 down vs E11.5 * Ctrl |
| 10554969 | Odz4          | NM_011858     | 1.38856e-005 | -1.69344 | E11.5 * Sox10 down vs E11.5 * Ctrl |
| 10498383 | Igsf10        | ENSMUST000000 | 3.14796e-005 | -1.69415 | E11.5 * Sox10 down vs E11.5 * Ctrl |
| 10528815 | 5031410I06Rik | NM_207657     | 5.88894e-007 | -1.69533 | E11.5 * Sox10 down vs E11.5 * Ctrl |
| 10543273 | Cttnbp2       | NM_080285     | 2.36731e-005 | -1.69565 | E11.5 * Sox10 down vs E11.5 * Ctrl |
| 10503659 | Epha7         | NM_010141     | 4.39285e-009 | -1.6973  | E11.5 * Sox10 down vs E11.5 * Ctrl |
| 10579054 | 4930467E23Rik | ENSMUST000000 | 0.00402345   | -1.69769 | E11.5 * Sox10 down vs E11.5 * Ctrl |
| 10386211 | 3100002J23Rik | ENSMUST000000 | 0.00160739   | -1.69769 | E11.5 * Sox10 down vs E11.5 * Ctrl |
| 10472846 | Pdk1          | NM_172665     | 0.000915985  | -1.69783 | E11.5 * Sox10 down vs E11.5 * Ctrl |
| 10498972 | Rbm46         | NM_001146328  | 0.000100467  | -1.69812 | E11.5 * Sox10 down vs E11.5 * Ctrl |
| 10584229 | ---           | ---           | 0.000514982  | -1.69817 | E11.5 * Sox10 down vs E11.5 * Ctrl |
| 10485633 | ENSMUSG000000 | ENSMUST000000 | 0.004708     | -1.69829 | E11.5 * Sox10 down vs E11.5 * Ctrl |
| 10603346 | Plp2          | NM_019755     | 2.49116e-005 | -1.69845 | E11.5 * Sox10 down vs E11.5 * Ctrl |
| 10485643 | Al314831      | NR_015462     | 0.000741288  | -1.6992  | E11.5 * Sox10 down vs E11.5 * Ctrl |
| 10504172 | 4933409K07Rik | BC059060      | 3.92248e-007 | -1.69962 | E11.5 * Sox10 down vs E11.5 * Ctrl |
| 10504169 | 4933409K07Rik | BC072647      | 6.56106e-007 | -1.69998 | E11.5 * Sox10 down vs E11.5 * Ctrl |
| 10483046 | Dpp4          | NM_010074     | 8.00732e-005 | -1.70035 | E11.5 * Sox10 down vs E11.5 * Ctrl |

|                        |               |              |          |                                    |
|------------------------|---------------|--------------|----------|------------------------------------|
| 10427816 Pdzd2         | NM_001081064  | 2.48708e-006 | -1.70093 | E11.5 * Sox10 down vs E11.5 * Ctrl |
| 10517508 C1qb          | NM_009777     | 0.00311665   | -1.70097 | E11.5 * Sox10 down vs E11.5 * Ctrl |
| 10450496 Lst1          | NM_010734     | 3.70022e-005 | -1.70152 | E11.5 * Sox10 down vs E11.5 * Ctrl |
| 10504139 4933409K07Rik | BC059060      | 7.46733e-007 | -1.70174 | E11.5 * Sox10 down vs E11.5 * Ctrl |
| 10498852 Rxfp1         | NM_212452     | 4.25435e-007 | -1.70273 | E11.5 * Sox10 down vs E11.5 * Ctrl |
| 10353731 4930444G20Rik | NM_053264     | 0.00152263   | -1.7037  | E11.5 * Sox10 down vs E11.5 * Ctrl |
| 10375145 Lcp2          | NM_010696     | 3.58986e-005 | -1.70394 | E11.5 * Sox10 down vs E11.5 * Ctrl |
| 10406598 Serinc5       | NM_172588     | 0.000234811  | -1.70505 | E11.5 * Sox10 down vs E11.5 * Ctrl |
| 10352576 Esrrg         | NM_011935     | 3.5855e-006  | -1.70515 | E11.5 * Sox10 down vs E11.5 * Ctrl |
| 10531928               | ---           | 0.000723585  | -1.7059  | E11.5 * Sox10 down vs E11.5 * Ctrl |
| 10559248 Tspan32       | NM_020286     | 1.92484e-008 | -1.70694 | E11.5 * Sox10 down vs E11.5 * Ctrl |
| 10400304 Egl3          | NM_028133     | 0.000751966  | -1.70812 | E11.5 * Sox10 down vs E11.5 * Ctrl |
| 10363860 Slc16a9       | NM_025807     | 0.000141871  | -1.71033 | E11.5 * Sox10 down vs E11.5 * Ctrl |
| 10377938 Eno3          | NM_007933     | 1.36236e-006 | -1.71131 | E11.5 * Sox10 down vs E11.5 * Ctrl |
| 10492438 EG624866      | NM_001037923  | 5.35566e-006 | -1.71178 | E11.5 * Sox10 down vs E11.5 * Ctrl |
| 10597074               | ---           | 5.26535e-008 | -1.71221 | E11.5 * Sox10 down vs E11.5 * Ctrl |
| 10403945 LOC100041230  | BC139425      | 0.00824568   | -1.71234 | E11.5 * Sox10 down vs E11.5 * Ctrl |
| 10504178 4933409K07Rik | BC059060      | 2.10751e-007 | -1.7128  | E11.5 * Sox10 down vs E11.5 * Ctrl |
| 10406782 Fam169a       | NM_001100458  | 0.000581333  | -1.71286 | E11.5 * Sox10 down vs E11.5 * Ctrl |
| 10496182 Cxxc4         | NM_001004367  | 4.42645e-007 | -1.71416 | E11.5 * Sox10 down vs E11.5 * Ctrl |
| 10535936               | ---           | 8.17238e-005 | -1.71652 | E11.5 * Sox10 down vs E11.5 * Ctrl |
| 10563085 Fcgrt         | NM_010189     | 3.6198e-009  | -1.71745 | E11.5 * Sox10 down vs E11.5 * Ctrl |
| 10566366 Al451617      | NM_199146     | 0.000475827  | -1.71763 | E11.5 * Sox10 down vs E11.5 * Ctrl |
| 10546452 Adamts9       | NM_175314     | 1.53559e-008 | -1.71809 | E11.5 * Sox10 down vs E11.5 * Ctrl |
| 10604694 Mtap7d3       | NM_177293     | 0.000325354  | -1.71878 | E11.5 * Sox10 down vs E11.5 * Ctrl |
| 10576911 Efnb2         | NM_010111     | 3.84095e-006 | -1.71891 | E11.5 * Sox10 down vs E11.5 * Ctrl |
| 10398356               | ---           | 8.74884e-005 | -1.71902 | E11.5 * Sox10 down vs E11.5 * Ctrl |
| 10360377 Al607873      | BC150711      | 0.000650853  | -1.72038 | E11.5 * Sox10 down vs E11.5 * Ctrl |
| 10357137 Gli2          | NM_001081125  | 2.43314e-006 | -1.72172 | E11.5 * Sox10 down vs E11.5 * Ctrl |
| 10415413 BC030046      | BC151043      | 7.27948e-006 | -1.72196 | E11.5 * Sox10 down vs E11.5 * Ctrl |
| 10504148 4933409K07Rik | BC059060      | 5.87185e-007 | -1.72321 | E11.5 * Sox10 down vs E11.5 * Ctrl |
| 10509441 Ece1          | NM_199307     | 6.4927e-005  | -1.7233  | E11.5 * Sox10 down vs E11.5 * Ctrl |
| 10496251 Bdh2          | NM_027208     | 1.40287e-006 | -1.7236  | E11.5 * Sox10 down vs E11.5 * Ctrl |
| 10598976 Timp1         | NM_001044384  | 1.94011e-005 | -1.72419 | E11.5 * Sox10 down vs E11.5 * Ctrl |
| 10502830 Nexn          | NM_199465     | 0.000115022  | -1.72439 | E11.5 * Sox10 down vs E11.5 * Ctrl |
| 10495416 Vav3          | NM_020505     | 8.6185e-006  | -1.72581 | E11.5 * Sox10 down vs E11.5 * Ctrl |
| 10461369 Ahnak         | NM_009643     | 2.66753e-006 | -1.72684 | E11.5 * Sox10 down vs E11.5 * Ctrl |
| 10496569 Gbp6          | NM_145545     | 4.26755e-006 | -1.72847 | E11.5 * Sox10 down vs E11.5 * Ctrl |
| 10538305 5730596B20Rik | ENSMUST000001 | 6.88183e-005 | -1.72921 | E11.5 * Sox10 down vs E11.5 * Ctrl |
| 10462922 Plce1         | NM_019588     | 2.33196e-009 | -1.72925 | E11.5 * Sox10 down vs E11.5 * Ctrl |
| 10451613 Foxp4         | NM_001110824  | 1.52537e-005 | -1.73086 | E11.5 * Sox10 down vs E11.5 * Ctrl |
| 10368317 Enpp3         | NM_134005     | 5.89897e-008 | -1.73246 | E11.5 * Sox10 down vs E11.5 * Ctrl |
| 10425749 Fam109b       | NM_177391     | 2.63977e-005 | -1.73278 | E11.5 * Sox10 down vs E11.5 * Ctrl |
| 10577388 4930467E23Rik | ENSMUST000001 | 0.00147295   | -1.73325 | E11.5 * Sox10 down vs E11.5 * Ctrl |
| 10416734               | ---           | 0.000137496  | -1.73325 | E11.5 * Sox10 down vs E11.5 * Ctrl |
| 10416974 Gpc6          | NM_001079844  | 1.65798e-006 | -1.73365 | E11.5 * Sox10 down vs E11.5 * Ctrl |
| 10502451 Bmpr1b        | NM_007560     | 4.47186e-005 | -1.73696 | E11.5 * Sox10 down vs E11.5 * Ctrl |
| 10459391 Fech          | NM_007998     | 1.16565e-007 | -1.73813 | E11.5 * Sox10 down vs E11.5 * Ctrl |
| 10462853 Cyp26a1       | NM_007811     | 6.2725e-007  | -1.73944 | E11.5 * Sox10 down vs E11.5 * Ctrl |
| 10435961 ENSMUSG000001 | ENSMUST000001 | 1.4536e-005  | -1.74013 | E11.5 * Sox10 down vs E11.5 * Ctrl |
| 10553450 Nell1         | NM_001037906  | 5.73351e-005 | -1.7402  | E11.5 * Sox10 down vs E11.5 * Ctrl |
| 10420891 Scara3        | NM_172604     | 2.58578e-005 | -1.74142 | E11.5 * Sox10 down vs E11.5 * Ctrl |
| 10497451 Cpa3          | NM_007753     | 0.00307409   | -1.7418  | E11.5 * Sox10 down vs E11.5 * Ctrl |
| 10577361               | ---           | 0.000213802  | -1.74212 | E11.5 * Sox10 down vs E11.5 * Ctrl |
| 10513208 Slep1         | NM_022814     | 1.38915e-007 | -1.74466 | E11.5 * Sox10 down vs E11.5 * Ctrl |
| 10430555 Dmc1          | NM_010059     | 0.000719373  | -1.7448  | E11.5 * Sox10 down vs E11.5 * Ctrl |
| 10422496 Gpr183        | NM_183031     | 1.09232e-006 | -1.74523 | E11.5 * Sox10 down vs E11.5 * Ctrl |
| 10545086 Snca          | NM_001042451  | 2.14974e-005 | -1.74524 | E11.5 * Sox10 down vs E11.5 * Ctrl |
| 10542355 Emp1          | NM_010128     | 0.000116814  | -1.7463  | E11.5 * Sox10 down vs E11.5 * Ctrl |
| 10411359 Plp2          | NM_019755     | 5.03531e-005 | -1.74761 | E11.5 * Sox10 down vs E11.5 * Ctrl |
| 10593198 Fam55b        | NM_030069     | 5.06794e-005 | -1.74766 | E11.5 * Sox10 down vs E11.5 * Ctrl |
| 10522060 Fam114a1      | NM_026667     | 9.89213e-006 | -1.74915 | E11.5 * Sox10 down vs E11.5 * Ctrl |
| 10455108 Pcdhb16       | NM_053141     | 0.00121083   | -1.74944 | E11.5 * Sox10 down vs E11.5 * Ctrl |
| 10491414 Usp13         | NM_001013024  | 9.08688e-006 | -1.74987 | E11.5 * Sox10 down vs E11.5 * Ctrl |
| 10444258 Psmb8         | NM_010724     | 1.13128e-005 | -1.75004 | E11.5 * Sox10 down vs E11.5 * Ctrl |
| 10398352               | ---           | 0.000915864  | -1.75066 | E11.5 * Sox10 down vs E11.5 * Ctrl |

|                        |              |              |          |                                    |
|------------------------|--------------|--------------|----------|------------------------------------|
| 10582388               | ---          | 0.00113821   | -1.75237 | E11.5 * Sox10 down vs E11.5 * Ctrl |
| 10492428 Tiparp        | NM_178892    | 4.94201e-007 | -1.753   | E11.5 * Sox10 down vs E11.5 * Ctrl |
| 10591090 Fat3          | NM_001080814 | 3.74694e-005 | -1.75404 | E11.5 * Sox10 down vs E11.5 * Ctrl |
| 10549282 Itpr2         | NM_019923    | 8.73622e-009 | -1.75435 | E11.5 * Sox10 down vs E11.5 * Ctrl |
| 10571444 Slc7a2        | NM_007514    | 3.85923e-005 | -1.75453 | E11.5 * Sox10 down vs E11.5 * Ctrl |
| 10514219 Scarna8       | AF357402     | 0.0002887    | -1.75462 | E11.5 * Sox10 down vs E11.5 * Ctrl |
| 10467258 Myof          | NM_001099634 | 2.32427e-007 | -1.75484 | E11.5 * Sox10 down vs E11.5 * Ctrl |
| 10379511 Ccl2          | NM_011333    | 9.97387e-008 | -1.75512 | E11.5 * Sox10 down vs E11.5 * Ctrl |
| 10472398 Scn2a1        | NM_001099298 | 0.0098356    | -1.7557  | E11.5 * Sox10 down vs E11.5 * Ctrl |
| 10410743 Ankrd32       | NM_134071    | 2.18544e-005 | -1.75592 | E11.5 * Sox10 down vs E11.5 * Ctrl |
| 10488378 Thbd          | NM_009378    | 0.000186473  | -1.75593 | E11.5 * Sox10 down vs E11.5 * Ctrl |
| 10408280 Lrrc16a       | NM_026825    | 8.02464e-008 | -1.75597 | E11.5 * Sox10 down vs E11.5 * Ctrl |
| 10390746               | ---          | 0.000234568  | -1.75796 | E11.5 * Sox10 down vs E11.5 * Ctrl |
| 10353729 4930444G20Rik | NM_053264    | 0.00161449   | -1.75925 | E11.5 * Sox10 down vs E11.5 * Ctrl |
| 10582464               | ---          | 0.00776706   | -1.76171 | E11.5 * Sox10 down vs E11.5 * Ctrl |
| 10368566 Tpd52l1       | NM_009413    | 0.000108444  | -1.76248 | E11.5 * Sox10 down vs E11.5 * Ctrl |
| 10606600 Pcdh19        | NM_001105245 | 6.29613e-006 | -1.76363 | E11.5 * Sox10 down vs E11.5 * Ctrl |
| 10488147 Flrt3         | NM_178382    | 2.42314e-007 | -1.76377 | E11.5 * Sox10 down vs E11.5 * Ctrl |
| 10399691 Id2           | NM_010496    | 8.4213e-007  | -1.76613 | E11.5 * Sox10 down vs E11.5 * Ctrl |
| 10352448 Dusp10        | NM_022019    | 8.91989e-006 | -1.76639 | E11.5 * Sox10 down vs E11.5 * Ctrl |
| 10492888               | ---          | 5.1331e-005  | -1.76714 | E11.5 * Sox10 down vs E11.5 * Ctrl |
| 10606770 Zmat1         | NM_175446    | 1.17636e-005 | -1.76844 | E11.5 * Sox10 down vs E11.5 * Ctrl |
| 10565712 Acer3         | NM_025408    | 8.53922e-006 | -1.76914 | E11.5 * Sox10 down vs E11.5 * Ctrl |
| 10418506 Stab1         | NM_138672    | 3.01378e-008 | -1.76957 | E11.5 * Sox10 down vs E11.5 * Ctrl |
| 10408812 Mak           | NM_001145803 | 2.49275e-005 | -1.76985 | E11.5 * Sox10 down vs E11.5 * Ctrl |
| 10443949 Adamts10      | NM_172619    | 7.09532e-006 | -1.7701  | E11.5 * Sox10 down vs E11.5 * Ctrl |
| 10345762 Il1r1         | NM_008362    | 1.43081e-005 | -1.77023 | E11.5 * Sox10 down vs E11.5 * Ctrl |
| 10462818 Hhex          | NM_008245    | 0.000134497  | -1.77079 | E11.5 * Sox10 down vs E11.5 * Ctrl |
| 10404059 Hist1h1c      | NM_015786    | 5.33371e-006 | -1.7714  | E11.5 * Sox10 down vs E11.5 * Ctrl |
| 10603573 Sytl5         | NM_177704    | 2.56715e-006 | -1.77395 | E11.5 * Sox10 down vs E11.5 * Ctrl |
| 10470562 ENSMUSG00000  | ENSMUST00000 | 0.000161474  | -1.77448 | E11.5 * Sox10 down vs E11.5 * Ctrl |
| 10354598 Hecw2         | NM_001001883 | 1.22333e-006 | -1.77518 | E11.5 * Sox10 down vs E11.5 * Ctrl |
| 10570585               | ---          | 0.000736845  | -1.77638 | E11.5 * Sox10 down vs E11.5 * Ctrl |
| 10538706 Mmrn1         | BC137623     | 0.00024419   | -1.7765  | E11.5 * Sox10 down vs E11.5 * Ctrl |
| 10539894 Mgl1          | NM_011844    | 5.66954e-005 | -1.77682 | E11.5 * Sox10 down vs E11.5 * Ctrl |
| 10503835 Rragd         | NM_027491    | 9.0912e-007  | -1.77783 | E11.5 * Sox10 down vs E11.5 * Ctrl |
| 10453797 AK220484      | NM_001083628 | 3.7801e-006  | -1.77838 | E11.5 * Sox10 down vs E11.5 * Ctrl |
| 10604608               | ---          | 0.000132715  | -1.77936 | E11.5 * Sox10 down vs E11.5 * Ctrl |
| 10490856 Raly1         | NM_178631    | 5.28424e-006 | -1.78204 | E11.5 * Sox10 down vs E11.5 * Ctrl |
| 10502081 Enpep         | NM_007934    | 8.74352e-007 | -1.78275 | E11.5 * Sox10 down vs E11.5 * Ctrl |
| 10542993 Pon3          | NM_173006    | 1.3317e-007  | -1.78373 | E11.5 * Sox10 down vs E11.5 * Ctrl |
| 10418410 Prkcd         | NM_011103    | 2.14281e-006 | -1.78634 | E11.5 * Sox10 down vs E11.5 * Ctrl |
| 10398442               | ---          | 0.00282509   | -1.78858 | E11.5 * Sox10 down vs E11.5 * Ctrl |
| 10526797 Stag3         | NM_016964    | 2.45119e-007 | -1.7888  | E11.5 * Sox10 down vs E11.5 * Ctrl |
| 10399924 Pik3cg        | NM_020272    | 1.58052e-006 | -1.78932 | E11.5 * Sox10 down vs E11.5 * Ctrl |
| 10435697 Popdc2        | NM_001081984 | 9.15862e-006 | -1.78961 | E11.5 * Sox10 down vs E11.5 * Ctrl |
| 10414537 Ang           | NM_007447    | 7.16612e-006 | -1.79075 | E11.5 * Sox10 down vs E11.5 * Ctrl |
| 10433782 Efcab1        | NM_025769    | 1.9148e-006  | -1.79152 | E11.5 * Sox10 down vs E11.5 * Ctrl |
| 10353989               | ---          | 0.00174506   | -1.79199 | E11.5 * Sox10 down vs E11.5 * Ctrl |
| 10579894 Hhip          | NM_020259    | 0.000192214  | -1.79215 | E11.5 * Sox10 down vs E11.5 * Ctrl |
| 10455139 Pcdhb22       | NM_053147    | 1.16007e-005 | -1.79234 | E11.5 * Sox10 down vs E11.5 * Ctrl |
| 10607945 4933400A11Rik | NR_003635    | 3.19452e-005 | -1.79451 | E11.5 * Sox10 down vs E11.5 * Ctrl |
| 10384656 B3gnt2        | NM_016888    | 1.68953e-005 | -1.79476 | E11.5 * Sox10 down vs E11.5 * Ctrl |
| 10354563 Dnahc7b       | ENSMUST00000 | 8.08591e-005 | -1.79562 | E11.5 * Sox10 down vs E11.5 * Ctrl |
| 10578989 Psd3          | NM_177698    | 2.8095e-006  | -1.79586 | E11.5 * Sox10 down vs E11.5 * Ctrl |
| 10604944 Gabre         | NM_017369    | 1.32793e-005 | -1.79752 | E11.5 * Sox10 down vs E11.5 * Ctrl |
| 10352548 Slc30a10      | NM_001033286 | 5.89285e-006 | -1.79842 | E11.5 * Sox10 down vs E11.5 * Ctrl |
| 10544002 Creb3l2       | NM_178661    | 1.98628e-008 | -1.79844 | E11.5 * Sox10 down vs E11.5 * Ctrl |
| 10441003 Runx1         | NM_001111023 | 1.59217e-005 | -1.79874 | E11.5 * Sox10 down vs E11.5 * Ctrl |
| 10504137 4933409K07Rik | BC072647     | 1.5758e-005  | -1.80085 | E11.5 * Sox10 down vs E11.5 * Ctrl |
| 10504201 4933409K07Rik | BC072647     | 1.5758e-005  | -1.80085 | E11.5 * Sox10 down vs E11.5 * Ctrl |
| 10512350 4933409K07Rik | BC072647     | 1.5758e-005  | -1.80085 | E11.5 * Sox10 down vs E11.5 * Ctrl |
| 10512352 4933409K07Rik | BC072647     | 1.5758e-005  | -1.80085 | E11.5 * Sox10 down vs E11.5 * Ctrl |
| 10424082 Aard          | NM_175503    | 1.90898e-005 | -1.80267 | E11.5 * Sox10 down vs E11.5 * Ctrl |
| 10430929 Tbrg3         | BC095996     | 6.28263e-005 | -1.80403 | E11.5 * Sox10 down vs E11.5 * Ctrl |
| 10373223 Lrp1          | NM_008512    | 8.37261e-005 | -1.80424 | E11.5 * Sox10 down vs E11.5 * Ctrl |

|          |               |               |              |          |                                    |
|----------|---------------|---------------|--------------|----------|------------------------------------|
| 10389134 | Slfn9         | NM_172796     | 3.52002e-008 | -1.80459 | E11.5 * Sox10 down vs E11.5 * Ctrl |
| 10500335 | Fcgr1         | NM_010186     | 1.2463e-005  | -1.80463 | E11.5 * Sox10 down vs E11.5 * Ctrl |
| 10361270 | Cd46          | NM_010778     | 8.81664e-005 | -1.80672 | E11.5 * Sox10 down vs E11.5 * Ctrl |
| 10536472 | Mdfic         | NM_175088     | 1.37072e-005 | -1.80824 | E11.5 * Sox10 down vs E11.5 * Ctrl |
| 10439312 | Cd86          | NM_019388     | 0.000819511  | -1.8094  | E11.5 * Sox10 down vs E11.5 * Ctrl |
| 10505674 | Cntln         | NM_175275     | 1.30615e-010 | -1.80968 | E11.5 * Sox10 down vs E11.5 * Ctrl |
| 10599174 | Il13ra1       | NM_133990     | 2.81199e-007 | -1.81018 | E11.5 * Sox10 down vs E11.5 * Ctrl |
| 10605493 | Prrg1         | BC032926      | 2.73226e-006 | -1.81022 | E11.5 * Sox10 down vs E11.5 * Ctrl |
| 10473384 | Slc43a3       | NM_021398     | 4.03344e-007 | -1.81055 | E11.5 * Sox10 down vs E11.5 * Ctrl |
| 10513166 | Ptpn3         | NM_011207     | 3.77199e-006 | -1.81093 | E11.5 * Sox10 down vs E11.5 * Ctrl |
| 10359201 | Ralgps2       | NM_023884     | 3.81201e-011 | -1.813   | E11.5 * Sox10 down vs E11.5 * Ctrl |
| 10450145 | Psmb9         | NM_013585     | 7.48258e-006 | -1.81388 | E11.5 * Sox10 down vs E11.5 * Ctrl |
| 10436590 | 2810055G20Rik | AK148800      | 0.000254653  | -1.81405 | E11.5 * Sox10 down vs E11.5 * Ctrl |
| 10409994 | EG435366      | ENSMUST000001 | 7.71775e-005 | -1.81428 | E11.5 * Sox10 down vs E11.5 * Ctrl |
| 10404649 | Dsp           | NM_023842     | 6.71116e-006 | -1.81496 | E11.5 * Sox10 down vs E11.5 * Ctrl |
| 10569618 | Ano1          | NM_178642     | 9.2024e-005  | -1.81618 | E11.5 * Sox10 down vs E11.5 * Ctrl |
| 10365559 | Igf1          | NM_010512     | 7.44718e-006 | -1.81635 | E11.5 * Sox10 down vs E11.5 * Ctrl |
| 10477717 | Procr         | NM_011171     | 1.79385e-005 | -1.8166  | E11.5 * Sox10 down vs E11.5 * Ctrl |
| 10494114 | Selenbp1      | NM_009150     | 6.71609e-005 | -1.81665 | E11.5 * Sox10 down vs E11.5 * Ctrl |
| 10484307 | Frzb          | NM_011356     | 2.98191e-005 | -1.81977 | E11.5 * Sox10 down vs E11.5 * Ctrl |
| 10419465 | Ccnb1ip1      | NM_001111119  | 1.20678e-006 | -1.82074 | E11.5 * Sox10 down vs E11.5 * Ctrl |
| 10591978 | Ntm           | NM_172290     | 3.8023e-006  | -1.82296 | E11.5 * Sox10 down vs E11.5 * Ctrl |
| 10521759 | Slit2         | NM_178804     | 1.69006e-007 | -1.82355 | E11.5 * Sox10 down vs E11.5 * Ctrl |
| 10579812 | Ednra         | NM_010332     | 5.14075e-007 | -1.82449 | E11.5 * Sox10 down vs E11.5 * Ctrl |
| 10583203 | Phxr4         | BC107288      | 0.00158176   | -1.82696 | E11.5 * Sox10 down vs E11.5 * Ctrl |
| 10428522 | Csmd3         | NM_001081391  | 0.000280293  | -1.82729 | E11.5 * Sox10 down vs E11.5 * Ctrl |
| 10439895 | Alcam         | NM_009655     | 5.02401e-006 | -1.82735 | E11.5 * Sox10 down vs E11.5 * Ctrl |
| 10489569 | Pltp          | NM_011125     | 2.75256e-008 | -1.82817 | E11.5 * Sox10 down vs E11.5 * Ctrl |
| 10455647 | Tnfaip8       | NM_134131     | 5.61469e-005 | -1.82947 | E11.5 * Sox10 down vs E11.5 * Ctrl |
| 10394731 | Rock2         | ENSMUST000001 | 3.18359e-005 | -1.83039 | E11.5 * Sox10 down vs E11.5 * Ctrl |
| 10380629 | Hoxb8         | NM_010461     | 2.4057e-007  | -1.83099 | E11.5 * Sox10 down vs E11.5 * Ctrl |
| 10502783 | ENSMUSG000001 | ENSMUST000001 | 0.000350742  | -1.83108 | E11.5 * Sox10 down vs E11.5 * Ctrl |
| 10583809 | Cnn1          | NM_009922     | 0.00106866   | -1.83159 | E11.5 * Sox10 down vs E11.5 * Ctrl |
| 10582466 | Sult5a1       | NM_020564     | 1.84819e-007 | -1.83176 | E11.5 * Sox10 down vs E11.5 * Ctrl |
| 10556611 | ---           | ---           | 0.00179954   | -1.83209 | E11.5 * Sox10 down vs E11.5 * Ctrl |
| 10396950 | ---           | ---           | 4.11079e-006 | -1.83284 | E11.5 * Sox10 down vs E11.5 * Ctrl |
| 10456296 | Malt1         | NM_172833     | 1.57564e-006 | -1.83377 | E11.5 * Sox10 down vs E11.5 * Ctrl |
| 10397633 | Flrt2         | NM_201518     | 2.24469e-006 | -1.83435 | E11.5 * Sox10 down vs E11.5 * Ctrl |
| 10495976 | Pitx2         | NM_011098     | 1.50803e-007 | -1.83497 | E11.5 * Sox10 down vs E11.5 * Ctrl |
| 10580955 | ---           | ---           | 0.00316127   | -1.83507 | E11.5 * Sox10 down vs E11.5 * Ctrl |
| 10366746 | Lrig3         | NM_177152     | 2.59256e-005 | -1.83672 | E11.5 * Sox10 down vs E11.5 * Ctrl |
| 10529824 | Prom1         | NM_008935     | 8.65226e-009 | -1.83717 | E11.5 * Sox10 down vs E11.5 * Ctrl |
| 10581605 | Hp            | NM_017370     | 0.000196721  | -1.83725 | E11.5 * Sox10 down vs E11.5 * Ctrl |
| 10384423 | Cobl          | NM_172496     | 2.46947e-007 | -1.84132 | E11.5 * Sox10 down vs E11.5 * Ctrl |
| 10570963 | Zmat4         | NM_177086     | 6.05585e-007 | -1.84151 | E11.5 * Sox10 down vs E11.5 * Ctrl |
| 10590631 | Ccr2          | NM_009915     | 4.25065e-005 | -1.84201 | E11.5 * Sox10 down vs E11.5 * Ctrl |
| 10344750 | Sgk3          | NM_133220     | 0.000700638  | -1.84202 | E11.5 * Sox10 down vs E11.5 * Ctrl |
| 10423568 | 5730407I07Rik | ENSMUST000001 | 2.40927e-005 | -1.84204 | E11.5 * Sox10 down vs E11.5 * Ctrl |
| 10600852 | ---           | ---           | 1.37714e-005 | -1.84268 | E11.5 * Sox10 down vs E11.5 * Ctrl |
| 10344935 | Kcnb2         | NM_001098528  | 2.06256e-005 | -1.84296 | E11.5 * Sox10 down vs E11.5 * Ctrl |
| 10467041 | Asah2         | NM_018830     | 6.48851e-008 | -1.8431  | E11.5 * Sox10 down vs E11.5 * Ctrl |
| 10531191 | Adamts3       | NM_001081401  | 0.00128709   | -1.84338 | E11.5 * Sox10 down vs E11.5 * Ctrl |
| 10528794 | 5031410I06Rik | NM_207657     | 1.48643e-008 | -1.84569 | E11.5 * Sox10 down vs E11.5 * Ctrl |
| 10476321 | Prnd          | NM_023043     | 6.06498e-005 | -1.84612 | E11.5 * Sox10 down vs E11.5 * Ctrl |
| 10466606 | Anxa1         | NM_010730     | 0.0044298    | -1.84718 | E11.5 * Sox10 down vs E11.5 * Ctrl |
| 10506201 | Ror1          | NM_013845     | 3.25797e-008 | -1.84996 | E11.5 * Sox10 down vs E11.5 * Ctrl |
| 10368947 | Aim1          | NM_172393     | 1.0482e-005  | -1.85122 | E11.5 * Sox10 down vs E11.5 * Ctrl |
| 10507500 | Slc6a9        | NM_008135     | 6.08466e-008 | -1.85248 | E11.5 * Sox10 down vs E11.5 * Ctrl |
| 10372652 | Lyz1          | NM_013590     | 0.000229213  | -1.85357 | E11.5 * Sox10 down vs E11.5 * Ctrl |
| 10426315 | Lrrk2         | NM_025730     | 6.47534e-008 | -1.85697 | E11.5 * Sox10 down vs E11.5 * Ctrl |
| 10503334 | Gem           | NM_010276     | 0.000110439  | -1.85737 | E11.5 * Sox10 down vs E11.5 * Ctrl |
| 10482517 | Nmi           | NM_001141949  | 0.000100521  | -1.85744 | E11.5 * Sox10 down vs E11.5 * Ctrl |
| 10528810 | Speer4a       | NM_029376     | 1.90063e-008 | -1.85948 | E11.5 * Sox10 down vs E11.5 * Ctrl |
| 10467038 | EG625995      | BC096400      | 0.00307968   | -1.86039 | E11.5 * Sox10 down vs E11.5 * Ctrl |
| 10432918 | Krt8          | NM_031170     | 0.000138258  | -1.86164 | E11.5 * Sox10 down vs E11.5 * Ctrl |
| 10588819 | 1700021K14Rik | NM_001122635  | 1.06189e-005 | -1.86217 | E11.5 * Sox10 down vs E11.5 * Ctrl |

|                        |              |              |          |                                    |
|------------------------|--------------|--------------|----------|------------------------------------|
| 10497381 Cyp7b1        | NM_007825    | 2.0443e-007  | -1.86226 | E11.5 * Sox10 down vs E11.5 * Ctrl |
| 10536845 Flnc          | NM_001081185 | 7.26561e-008 | -1.86545 | E11.5 * Sox10 down vs E11.5 * Ctrl |
| 10441902 Smoc2         | NM_022315    | 2.05875e-006 | -1.8681  | E11.5 * Sox10 down vs E11.5 * Ctrl |
| 10594110 Neo1          | NM_008684    | 3.96926e-011 | -1.86826 | E11.5 * Sox10 down vs E11.5 * Ctrl |
| 10363887 Bicc1         | NM_031397    | 0.000141716  | -1.86926 | E11.5 * Sox10 down vs E11.5 * Ctrl |
| 10441791 D17Ertd663e   | ENSMUST00000 | 6.70958e-008 | -1.86968 | E11.5 * Sox10 down vs E11.5 * Ctrl |
| 10594199 Thsd4         | NM_001040426 | 1.334e-006   | -1.87123 | E11.5 * Sox10 down vs E11.5 * Ctrl |
| 10455112 Pcdhb17       | NM_053142    | 2.95775e-005 | -1.87179 | E11.5 * Sox10 down vs E11.5 * Ctrl |
| 10513158 Ptpn3         | NM_011207    | 0.00152476   | -1.87227 | E11.5 * Sox10 down vs E11.5 * Ctrl |
| 10439500 Upk1b         | NM_178924    | 0.00150278   | -1.8732  | E11.5 * Sox10 down vs E11.5 * Ctrl |
| 10586718 9530091C08Rik | NM_177159    | 0.000816948  | -1.8738  | E11.5 * Sox10 down vs E11.5 * Ctrl |
| 10522749 Lphn3         | NM_198702    | 6.3807e-007  | -1.87681 | E11.5 * Sox10 down vs E11.5 * Ctrl |
| 10505717 Adamts1       | NM_029967    | 2.02534e-005 | -1.87724 | E11.5 * Sox10 down vs E11.5 * Ctrl |
| 10502890 St6galnac3    | NM_011372    | 1.05255e-007 | -1.87799 | E11.5 * Sox10 down vs E11.5 * Ctrl |
| 10567580 Igsf6         | NM_030691    | 5.93055e-006 | -1.87809 | E11.5 * Sox10 down vs E11.5 * Ctrl |
| 10590842 ENSMUSG0000C  | ENSMUST00000 | 0.00837691   | -1.8784  | E11.5 * Sox10 down vs E11.5 * Ctrl |
| 10514128 Ttc39b        | NM_027238    | 0.000170344  | -1.87966 | E11.5 * Sox10 down vs E11.5 * Ctrl |
| 10368970 Prdm1         | NM_007548    | 2.84235e-006 | -1.87996 | E11.5 * Sox10 down vs E11.5 * Ctrl |
| 10395273 Gdap10        | BC052902     | 5.90515e-005 | -1.88089 | E11.5 * Sox10 down vs E11.5 * Ctrl |
| 10580033 Cd97          | NM_011925    | 3.37466e-005 | -1.883   | E11.5 * Sox10 down vs E11.5 * Ctrl |
| 10359870 Pbx1          | NM_183355    | 3.25717e-006 | -1.88489 | E11.5 * Sox10 down vs E11.5 * Ctrl |
| 10459768               | ---          | 0.000662933  | -1.88509 | E11.5 * Sox10 down vs E11.5 * Ctrl |
| 10464251 Atrnl1        | NM_181415    | 2.62997e-007 | -1.88597 | E11.5 * Sox10 down vs E11.5 * Ctrl |
| 10505489 Pappa         | NM_021362    | 5.25514e-007 | -1.89066 | E11.5 * Sox10 down vs E11.5 * Ctrl |
| 10363696 D630028G08Rik | AK038706     | 1.49466e-005 | -1.89081 | E11.5 * Sox10 down vs E11.5 * Ctrl |
| 10455054 Pcdhb3        | NM_053128    | 3.78569e-005 | -1.8922  | E11.5 * Sox10 down vs E11.5 * Ctrl |
| 10497580               | ---          | 0.0022458    | -1.89235 | E11.5 * Sox10 down vs E11.5 * Ctrl |
| 10587733 Ctsh          | NM_007801    | 4.79457e-005 | -1.89236 | E11.5 * Sox10 down vs E11.5 * Ctrl |
| 10570894 Ank1          | NM_001110783 | 5.68875e-011 | -1.895   | E11.5 * Sox10 down vs E11.5 * Ctrl |
| 10401317 EG214321      | NM_001038995 | 5.87889e-005 | -1.8959  | E11.5 * Sox10 down vs E11.5 * Ctrl |
| 10476021 Sirpa         | NM_007547    | 1.39142e-007 | -1.89796 | E11.5 * Sox10 down vs E11.5 * Ctrl |
| 10549108 Abcc9         | NM_021041    | 2.62966e-007 | -1.90249 | E11.5 * Sox10 down vs E11.5 * Ctrl |
| 10534862 Pcolce        | NM_008788    | 4.41663e-005 | -1.9033  | E11.5 * Sox10 down vs E11.5 * Ctrl |
| 10457091 Neto1         | NM_144946    | 9.44524e-005 | -1.90416 | E11.5 * Sox10 down vs E11.5 * Ctrl |
| 10588899 Gpx1          | NM_008160    | 6.95813e-005 | -1.90417 | E11.5 * Sox10 down vs E11.5 * Ctrl |
| 10579958 Il15          | NM_008357    | 5.21393e-007 | -1.90496 | E11.5 * Sox10 down vs E11.5 * Ctrl |
| 10496971 Asb17         | NM_025758    | 7.98069e-008 | -1.90822 | E11.5 * Sox10 down vs E11.5 * Ctrl |
| 10368598 Rlbp112       | NM_175448    | 4.54324e-005 | -1.90891 | E11.5 * Sox10 down vs E11.5 * Ctrl |
| 10366476 Ptpnb         | NM_029928    | 2.15785e-007 | -1.91181 | E11.5 * Sox10 down vs E11.5 * Ctrl |
| 10366645 1700006J14Rik | ENSMUST00000 | 5.57338e-006 | -1.91294 | E11.5 * Sox10 down vs E11.5 * Ctrl |
| 10403743 Inhba         | NM_008380    | 5.82382e-006 | -1.91351 | E11.5 * Sox10 down vs E11.5 * Ctrl |
| 10396270 Dact1         | NM_021532    | 1.18667e-005 | -1.91403 | E11.5 * Sox10 down vs E11.5 * Ctrl |
| 10478525 Wfdc2         | NM_026323    | 9.1756e-006  | -1.91414 | E11.5 * Sox10 down vs E11.5 * Ctrl |
| 10461721 Mpeg1         | NM_010821    | 9.88899e-005 | -1.91414 | E11.5 * Sox10 down vs E11.5 * Ctrl |
| 10423902 Zfp2m2        | NM_011766    | 1.03417e-005 | -1.91547 | E11.5 * Sox10 down vs E11.5 * Ctrl |
| 10349510               | ---          | 0.00126509   | -1.91585 | E11.5 * Sox10 down vs E11.5 * Ctrl |
| 10496438 Adh1          | NM_007409    | 0.00392742   | -1.91719 | E11.5 * Sox10 down vs E11.5 * Ctrl |
| 10407281 Esm1          | NM_023612    | 1.87266e-007 | -1.91746 | E11.5 * Sox10 down vs E11.5 * Ctrl |
| 10352143 D230039L06Rik | NM_177724    | 1.07199e-006 | -1.91986 | E11.5 * Sox10 down vs E11.5 * Ctrl |
| 10422022 ENSMUSG0000C  | ENSMUST00000 | 7.94175e-005 | -1.92113 | E11.5 * Sox10 down vs E11.5 * Ctrl |
| 10419082 5730469M10Rik | BC056635     | 3.10386e-007 | -1.92264 | E11.5 * Sox10 down vs E11.5 * Ctrl |
| 10447946 4930474M22Rik | BC089489     | 2.50836e-006 | -1.92417 | E11.5 * Sox10 down vs E11.5 * Ctrl |
| 10512332 4930466F19Rik | ENSMUST00000 | 0.00268251   | -1.92443 | E11.5 * Sox10 down vs E11.5 * Ctrl |
| 10512354 4930466F19Rik | ENSMUST00000 | 0.00268251   | -1.92443 | E11.5 * Sox10 down vs E11.5 * Ctrl |
| 10523579 Arhgap24      | NM_029270    | 1.37154e-008 | -1.92708 | E11.5 * Sox10 down vs E11.5 * Ctrl |
| 10575548               | ---          | 0.000216324  | -1.92723 | E11.5 * Sox10 down vs E11.5 * Ctrl |
| 10545707 Actg2         | NM_009610    | 0.000192406  | -1.92869 | E11.5 * Sox10 down vs E11.5 * Ctrl |
| 10511429 Car8          | NM_007592    | 8.00753e-006 | -1.92928 | E11.5 * Sox10 down vs E11.5 * Ctrl |
| 10523468 Bmp2k         | NM_080708    | 8.75116e-006 | -1.92977 | E11.5 * Sox10 down vs E11.5 * Ctrl |
| 10472757 Cybrd1        | NM_028593    | 2.82486e-007 | -1.93075 | E11.5 * Sox10 down vs E11.5 * Ctrl |
| 10369844 Bicc1         | NM_031397    | 9.55337e-008 | -1.93265 | E11.5 * Sox10 down vs E11.5 * Ctrl |
| 10383765               | ---          | 0.000415161  | -1.93402 | E11.5 * Sox10 down vs E11.5 * Ctrl |
| 10433096 Nfe2          | NM_008685    | 5.99904e-008 | -1.93447 | E11.5 * Sox10 down vs E11.5 * Ctrl |
| 10527963               | ---          | 1.04769e-006 | -1.93522 | E11.5 * Sox10 down vs E11.5 * Ctrl |
| 10433492 Atf7ip2       | NM_153123    | 2.38949e-006 | -1.93632 | E11.5 * Sox10 down vs E11.5 * Ctrl |
| 10573457 Klf1          | NM_010635    | 3.66241e-007 | -1.93897 | E11.5 * Sox10 down vs E11.5 * Ctrl |

|                        |               |              |          |                                    |
|------------------------|---------------|--------------|----------|------------------------------------|
| 10345212 Khdrbs2       | NM_133235     | 5.40256e-006 | -1.93902 | E11.5 * Sox10 down vs E11.5 * Ctrl |
| 10392560 Abca9         | NM_147220     | 5.0881e-008  | -1.93947 | E11.5 * Sox10 down vs E11.5 * Ctrl |
| 10404982 Barx1         | NM_007526     | 1.66996e-005 | -1.93997 | E11.5 * Sox10 down vs E11.5 * Ctrl |
| 10478936               | ---           | 0.00285348   | -1.94395 | E11.5 * Sox10 down vs E11.5 * Ctrl |
| 10521796               | ---           | 0.000300515  | -1.94751 | E11.5 * Sox10 down vs E11.5 * Ctrl |
| 10427906 D130046C19Rik | AK051399      | 0.000234979  | -1.94769 | E11.5 * Sox10 down vs E11.5 * Ctrl |
| 10400844 Pygl          | NM_133198     | 2.09368e-007 | -1.94772 | E11.5 * Sox10 down vs E11.5 * Ctrl |
| 10441787 2810051F02Rik | BC009123      | 9.84461e-008 | -1.94886 | E11.5 * Sox10 down vs E11.5 * Ctrl |
| 10406928 Cd180         | NM_008533     | 1.10741e-005 | -1.94911 | E11.5 * Sox10 down vs E11.5 * Ctrl |
| 10570855 Plat          | NM_008872     | 7.47975e-006 | -1.95091 | E11.5 * Sox10 down vs E11.5 * Ctrl |
| 10414262 Ear2          | NM_007895     | 2.1191e-006  | -1.95116 | E11.5 * Sox10 down vs E11.5 * Ctrl |
| 10544089 Zc3hav1       | NM_028421     | 1.75354e-008 | -1.95121 | E11.5 * Sox10 down vs E11.5 * Ctrl |
| 10545401 Vamp5         | NM_016872     | 3.73399e-007 | -1.95262 | E11.5 * Sox10 down vs E11.5 * Ctrl |
| 10455721 Sncalp        | NM_026408     | 1.4457e-005  | -1.95595 | E11.5 * Sox10 down vs E11.5 * Ctrl |
| 10528476               | ---           | 0.000772574  | -1.95607 | E11.5 * Sox10 down vs E11.5 * Ctrl |
| 10433274 Vasn          | NM_139307     | 2.73336e-006 | -1.95729 | E11.5 * Sox10 down vs E11.5 * Ctrl |
| 10513805 Dbc1          | NM_019967     | 5.43431e-007 | -1.96255 | E11.5 * Sox10 down vs E11.5 * Ctrl |
| 10398362 Rian          | AF357355      | 0.00100658   | -1.96469 | E11.5 * Sox10 down vs E11.5 * Ctrl |
| 10536324 Asb4          | NM_023048     | 1.71178e-005 | -1.96593 | E11.5 * Sox10 down vs E11.5 * Ctrl |
| 10591120 Fat3          | NM_001080814  | 2.78793e-006 | -1.96644 | E11.5 * Sox10 down vs E11.5 * Ctrl |
| 10568392 Rgs10         | NM_026418     | 3.01838e-008 | -1.96687 | E11.5 * Sox10 down vs E11.5 * Ctrl |
| 10506058 Inadl         | NM_172696     | 4.02647e-009 | -1.97127 | E11.5 * Sox10 down vs E11.5 * Ctrl |
| 10376950 Pmp22         | NM_008885     | 1.06811e-008 | -1.97178 | E11.5 * Sox10 down vs E11.5 * Ctrl |
| 10458894 Lox           | NM_010728     | 7.18021e-005 | -1.97272 | E11.5 * Sox10 down vs E11.5 * Ctrl |
| 10598507 Slc38a5       | NM_172479     | 9.19416e-007 | -1.97277 | E11.5 * Sox10 down vs E11.5 * Ctrl |
| 10532085 Tgfb3         | NM_011578     | 4.27895e-008 | -1.97344 | E11.5 * Sox10 down vs E11.5 * Ctrl |
| 10533309 Jph1          | AK081751      | 0.000961035  | -1.97473 | E11.5 * Sox10 down vs E11.5 * Ctrl |
| 10438708 Masp1         | NM_008555     | 1.03231e-005 | -1.97792 | E11.5 * Sox10 down vs E11.5 * Ctrl |
| 10380571 Gngt2         | NM_023121     | 2.24736e-005 | -1.97815 | E11.5 * Sox10 down vs E11.5 * Ctrl |
| 10372293 EG628870      | XM_893664     | 4.0447e-010  | -1.97984 | E11.5 * Sox10 down vs E11.5 * Ctrl |
| 10418355 Cacna1d       | NM_028981     | 6.62106e-009 | -1.98105 | E11.5 * Sox10 down vs E11.5 * Ctrl |
| 10398360               | ---           | 0.000401458  | -1.98118 | E11.5 * Sox10 down vs E11.5 * Ctrl |
| 10362294 Arhgap18      | NM_176837     | 1.50403e-006 | -1.98204 | E11.5 * Sox10 down vs E11.5 * Ctrl |
| 10458303 Ecscr         | NM_001033141  | 7.04632e-008 | -1.98224 | E11.5 * Sox10 down vs E11.5 * Ctrl |
| 10502552 Clca1         | NM_009899     | 0.000240948  | -1.98419 | E11.5 * Sox10 down vs E11.5 * Ctrl |
| 10453759 ENSMUSG00000C | ENSMUST000000 | 9.07432e-009 | -1.98484 | E11.5 * Sox10 down vs E11.5 * Ctrl |
| 10519747 Sema3e        | NM_011348     | 4.91673e-007 | -1.9935  | E11.5 * Sox10 down vs E11.5 * Ctrl |
| 10554808 Fzd4          | NM_008055     | 6.73073e-006 | -1.99376 | E11.5 * Sox10 down vs E11.5 * Ctrl |
| 10436392 Cpx           | NM_007757     | 1.0206e-006  | -1.99513 | E11.5 * Sox10 down vs E11.5 * Ctrl |
| 10604576 Gpc3          | NM_016697     | 1.38761e-006 | -1.99729 | E11.5 * Sox10 down vs E11.5 * Ctrl |
| 10578829 Palld         | NM_001081390  | 1.57606e-005 | -1.99844 | E11.5 * Sox10 down vs E11.5 * Ctrl |
| 10503520 Ttpa          | NM_015767     | 3.67084e-006 | -1.99935 | E11.5 * Sox10 down vs E11.5 * Ctrl |
| 10369792 Arid5b        | NM_023598     | 1.23949e-005 | -2.0001  | E11.5 * Sox10 down vs E11.5 * Ctrl |
| 10554863 Sytl2         | NM_001040085  | 2.03878e-006 | -2.0047  | E11.5 * Sox10 down vs E11.5 * Ctrl |
| 10427918 Fam105a       | BC052328      | 1.01269e-007 | -2.00978 | E11.5 * Sox10 down vs E11.5 * Ctrl |
| 10352150               | ---           | 3.62735e-007 | -2.0153  | E11.5 * Sox10 down vs E11.5 * Ctrl |
| 10591135 Fat3          | NM_001080814  | 6.74262e-005 | -2.01567 | E11.5 * Sox10 down vs E11.5 * Ctrl |
| 10360070 Fcer1g        | NM_010185     | 7.70365e-006 | -2.01827 | E11.5 * Sox10 down vs E11.5 * Ctrl |
| 10600857 Heph          | NM_010417     | 9.2749e-007  | -2.01921 | E11.5 * Sox10 down vs E11.5 * Ctrl |
| 10465916 Gm98          | BC157942      | 5.28665e-007 | -2.0193  | E11.5 * Sox10 down vs E11.5 * Ctrl |
| 10368409 Lama2         | NM_008481     | 2.79727e-010 | -2.02105 | E11.5 * Sox10 down vs E11.5 * Ctrl |
| 10359929 Ddr2          | NM_022563     | 1.27708e-006 | -2.02267 | E11.5 * Sox10 down vs E11.5 * Ctrl |
| 10466210 Ms4a6d        | NM_026835     | 4.82291e-007 | -2.02488 | E11.5 * Sox10 down vs E11.5 * Ctrl |
| 10602221               | ---           | 6.79788e-005 | -2.02604 | E11.5 * Sox10 down vs E11.5 * Ctrl |
| 10382106 Gm885         | NM_001033435  | 6.34443e-006 | -2.03129 | E11.5 * Sox10 down vs E11.5 * Ctrl |
| 10434806 Lpp           | NM_178665     | 1.68797e-006 | -2.03228 | E11.5 * Sox10 down vs E11.5 * Ctrl |
| 10531197 Adamts3       | NM_001081401  | 2.50894e-006 | -2.03689 | E11.5 * Sox10 down vs E11.5 * Ctrl |
| 10408329 Gmnn          | AF068780      | 0.0002256    | -2.03727 | E11.5 * Sox10 down vs E11.5 * Ctrl |
| 10381603 Fzd2          | NM_020510     | 8.42943e-007 | -2.03869 | E11.5 * Sox10 down vs E11.5 * Ctrl |
| 10358421 Rgs18         | NM_022881     | 1.60712e-008 | -2.04658 | E11.5 * Sox10 down vs E11.5 * Ctrl |
| 10546661 Foxp1         | NM_053202     | 1.02742e-008 | -2.04917 | E11.5 * Sox10 down vs E11.5 * Ctrl |
| 10367822 Rab32         | NM_026405     | 1.41518e-005 | -2.05001 | E11.5 * Sox10 down vs E11.5 * Ctrl |
| 10474295 Wt1           | NM_144783     | 1.19225e-007 | -2.05245 | E11.5 * Sox10 down vs E11.5 * Ctrl |
| 10519983 Fgl2          | NM_008013     | 1.1456e-006  | -2.05406 | E11.5 * Sox10 down vs E11.5 * Ctrl |
| 10360040 Fcgr3         | NM_010188     | 2.93395e-007 | -2.0544  | E11.5 * Sox10 down vs E11.5 * Ctrl |
| 10351623 F11r          | NM_172647     | 6.06012e-005 | -2.05583 | E11.5 * Sox10 down vs E11.5 * Ctrl |

|          |               |              |              |          |                                    |
|----------|---------------|--------------|--------------|----------|------------------------------------|
| 10537834 | Arhgef5       | NM_133674    | 4.96131e-008 | -2.05928 | E11.5 * Sox10 down vs E11.5 * Ctrl |
| 10538842 | Gng12         | NM_025278    | 1.57271e-009 | -2.05975 | E11.5 * Sox10 down vs E11.5 * Ctrl |
| 10462237 | Smarca2       | NM_011416    | 2.70477e-010 | -2.06456 | E11.5 * Sox10 down vs E11.5 * Ctrl |
| 10389231 | Ccl3          | NM_011337    | 0.000166009  | -2.06741 | E11.5 * Sox10 down vs E11.5 * Ctrl |
| 10549420 | Tmtc1         | NM_198967    | 4.28759e-008 | -2.06812 | E11.5 * Sox10 down vs E11.5 * Ctrl |
| 10348632 | Twist2        | NM_007855    | 3.32112e-007 | -2.06975 | E11.5 * Sox10 down vs E11.5 * Ctrl |
| 10530536 | Tec           | NM_001113460 | 2.76372e-006 | -2.07199 | E11.5 * Sox10 down vs E11.5 * Ctrl |
| 10530615 | Ociad2        | NM_026950    | 6.39449e-005 | -2.07514 | E11.5 * Sox10 down vs E11.5 * Ctrl |
| 10544768 | Hoxa5         | NM_010453    | 4.7866e-005  | -2.0754  | E11.5 * Sox10 down vs E11.5 * Ctrl |
| 10389025 | Myo1d         | NM_177390    | 2.37289e-005 | -2.07574 | E11.5 * Sox10 down vs E11.5 * Ctrl |
| 10424140 | Col14a1       | NM_181277    | 2.17593e-006 | -2.07694 | E11.5 * Sox10 down vs E11.5 * Ctrl |
| 10601360 | Atp7a         | NM_001109757 | 1.97546e-009 | -2.0797  | E11.5 * Sox10 down vs E11.5 * Ctrl |
| 10590031 | Itga9         | NM_133721    | 7.82065e-007 | -2.08129 | E11.5 * Sox10 down vs E11.5 * Ctrl |
| 10398358 | ---           | ---          | 0.00100578   | -2.08167 | E11.5 * Sox10 down vs E11.5 * Ctrl |
| 10527959 | ---           | ---          | 0.000166322  | -2.0819  | E11.5 * Sox10 down vs E11.5 * Ctrl |
| 10484389 | Tfpi          | NM_011576    | 3.01057e-010 | -2.08495 | E11.5 * Sox10 down vs E11.5 * Ctrl |
| 10475890 | Mertk         | NM_008587    | 2.4598e-007  | -2.08629 | E11.5 * Sox10 down vs E11.5 * Ctrl |
| 10401607 | Pgf           | NM_008827    | 2.91533e-006 | -2.08866 | E11.5 * Sox10 down vs E11.5 * Ctrl |
| 10398368 | ---           | ---          | 1.90945e-007 | -2.09049 | E11.5 * Sox10 down vs E11.5 * Ctrl |
| 10484203 | 2610301F02Rik | ENSMUST00000 | 7.71097e-009 | -2.09283 | E11.5 * Sox10 down vs E11.5 * Ctrl |
| 10513145 | Ptpn3         | NM_011207    | 1.78831e-005 | -2.093   | E11.5 * Sox10 down vs E11.5 * Ctrl |
| 10398408 | ---           | ---          | 0.00119871   | -2.09533 | E11.5 * Sox10 down vs E11.5 * Ctrl |
| 10544774 | Hoxa6         | NM_010454    | 7.67946e-007 | -2.09705 | E11.5 * Sox10 down vs E11.5 * Ctrl |
| 10471721 | Ptgs1         | NM_008969    | 8.27828e-009 | -2.09736 | E11.5 * Sox10 down vs E11.5 * Ctrl |
| 10606694 | Btk           | NM_013482    | 2.78054e-006 | -2.09957 | E11.5 * Sox10 down vs E11.5 * Ctrl |
| 10354677 | Ankrd44       | NM_001081433 | 2.45936e-007 | -2.10486 | E11.5 * Sox10 down vs E11.5 * Ctrl |
| 10436304 | Abi3bp        | NM_001014423 | 2.91788e-007 | -2.10487 | E11.5 * Sox10 down vs E11.5 * Ctrl |
| 10502766 | Lphn2         | NM_001081298 | 0.00056724   | -2.10757 | E11.5 * Sox10 down vs E11.5 * Ctrl |
| 10566326 | Trim12        | NM_023835    | 2.74134e-005 | -2.10914 | E11.5 * Sox10 down vs E11.5 * Ctrl |
| 10445291 | ---           | ---          | 9.26098e-005 | -2.11586 | E11.5 * Sox10 down vs E11.5 * Ctrl |
| 10578880 | Tll1          | NM_009390    | 4.81194e-006 | -2.11742 | E11.5 * Sox10 down vs E11.5 * Ctrl |
| 10533401 | Cux2          | ENSMUST00000 | 4.00692e-007 | -2.11944 | E11.5 * Sox10 down vs E11.5 * Ctrl |
| 10494548 | Gja5          | NM_008121    | 1.57031e-006 | -2.12604 | E11.5 * Sox10 down vs E11.5 * Ctrl |
| 10427297 | Hoxc5         | NM_175730    | 6.12751e-009 | -2.12811 | E11.5 * Sox10 down vs E11.5 * Ctrl |
| 10384504 | Meis1         | NM_010789    | 3.24236e-009 | -2.13374 | E11.5 * Sox10 down vs E11.5 * Ctrl |
| 10548761 | Hebp1         | NM_013546    | 2.98867e-006 | -2.13579 | E11.5 * Sox10 down vs E11.5 * Ctrl |
| 10527638 | Alox5ap       | NM_009663    | 5.82359e-006 | -2.13663 | E11.5 * Sox10 down vs E11.5 * Ctrl |
| 10537849 | Arhgef5       | NM_133674    | 8.30113e-008 | -2.1378  | E11.5 * Sox10 down vs E11.5 * Ctrl |
| 10583021 | Pdgrf1        | NM_027924    | 3.47261e-006 | -2.1389  | E11.5 * Sox10 down vs E11.5 * Ctrl |
| 10459766 | Scarna17      | AF357342     | 4.2906e-005  | -2.14318 | E11.5 * Sox10 down vs E11.5 * Ctrl |
| 10461642 | Scarna17      | AF357342     | 4.2906e-005  | -2.14318 | E11.5 * Sox10 down vs E11.5 * Ctrl |
| 10513362 | OTTMUSG00000  | ENSMUST00000 | 3.01019e-008 | -2.14404 | E11.5 * Sox10 down vs E11.5 * Ctrl |
| 10416004 | Zfp395        | NM_199029    | 2.1876e-005  | -2.14604 | E11.5 * Sox10 down vs E11.5 * Ctrl |
| 10506301 | Lepr          | NM_001122899 | 4.10597e-008 | -2.14747 | E11.5 * Sox10 down vs E11.5 * Ctrl |
| 10528207 | Cd36          | NM_001159557 | 2.66967e-007 | -2.15315 | E11.5 * Sox10 down vs E11.5 * Ctrl |
| 10410039 | Ptch1         | NM_008957    | 8.73319e-008 | -2.15477 | E11.5 * Sox10 down vs E11.5 * Ctrl |
| 10458731 | Mcc           | NM_001085373 | 4.83062e-009 | -2.15503 | E11.5 * Sox10 down vs E11.5 * Ctrl |
| 10479973 | ENSMUSG00000  | ENSMUST00000 | 0.00136923   | -2.15515 | E11.5 * Sox10 down vs E11.5 * Ctrl |
| 10427075 | Krt18         | NM_010664    | 5.46689e-006 | -2.15604 | E11.5 * Sox10 down vs E11.5 * Ctrl |
| 10379530 | Ccl12         | NM_011331    | 2.18507e-006 | -2.15878 | E11.5 * Sox10 down vs E11.5 * Ctrl |
| 10514177 | Bnc2          | NM_172870    | 2.15924e-007 | -2.15907 | E11.5 * Sox10 down vs E11.5 * Ctrl |
| 10395320 | Twist1        | NM_011658    | 0.000236244  | -2.15909 | E11.5 * Sox10 down vs E11.5 * Ctrl |
| 10428509 | Csmd3         | NM_001081391 | 0.0103642    | -2.16098 | E11.5 * Sox10 down vs E11.5 * Ctrl |
| 10415651 | Fgf9          | NM_013518    | 4.10431e-007 | -2.16253 | E11.5 * Sox10 down vs E11.5 * Ctrl |
| 10374727 | Bcl11a        | NM_016707    | 3.00327e-008 | -2.16629 | E11.5 * Sox10 down vs E11.5 * Ctrl |
| 10574027 | Mt1           | NM_013602    | 2.87197e-005 | -2.16761 | E11.5 * Sox10 down vs E11.5 * Ctrl |
| 10373179 | Gli1          | NM_010296    | 1.11696e-008 | -2.16841 | E11.5 * Sox10 down vs E11.5 * Ctrl |
| 10433484 | Atf7ip2       | NM_153123    | 7.22977e-005 | -2.17316 | E11.5 * Sox10 down vs E11.5 * Ctrl |
| 10544487 | Tpk1          | NM_013861    | 9.86342e-006 | -2.17847 | E11.5 * Sox10 down vs E11.5 * Ctrl |
| 10527713 | Rxfp2         | NM_080468    | 1.77254e-010 | -2.18352 | E11.5 * Sox10 down vs E11.5 * Ctrl |
| 10366446 | Tspan8        | NM_146010    | 0.00383816   | -2.18363 | E11.5 * Sox10 down vs E11.5 * Ctrl |
| 10502776 | Lphn2         | NM_001081298 | 4.11571e-012 | -2.18646 | E11.5 * Sox10 down vs E11.5 * Ctrl |
| 10593832 | ---           | ---          | 0.000121338  | -2.19187 | E11.5 * Sox10 down vs E11.5 * Ctrl |
| 10427904 | Fbxl7         | BC050864     | 3.65813e-006 | -2.19289 | E11.5 * Sox10 down vs E11.5 * Ctrl |
| 10599680 | 3830403N18Rik | NM_027510    | 1.51014e-007 | -2.19683 | E11.5 * Sox10 down vs E11.5 * Ctrl |
| 10406519 | Hapln1        | NM_013500    | 4.81238e-006 | -2.20158 | E11.5 * Sox10 down vs E11.5 * Ctrl |

|                        |               |              |          |                                    |
|------------------------|---------------|--------------|----------|------------------------------------|
| 10536499 Cav1          | NM_007616     | 0.000137566  | -2.20505 | E11.5 * Sox10 down vs E11.5 * Ctrl |
| 10374777 Efemp1        | NM_146015     | 3.2201e-006  | -2.21154 | E11.5 * Sox10 down vs E11.5 * Ctrl |
| 10406905 Ccdc125       | NM_183115     | 3.16933e-006 | -2.21215 | E11.5 * Sox10 down vs E11.5 * Ctrl |
| 10429128 Sla           | NM_001029841  | 2.77973e-005 | -2.21333 | E11.5 * Sox10 down vs E11.5 * Ctrl |
| 10587690 Bcl2a1b       | NM_007534     | 1.66852e-006 | -2.21523 | E11.5 * Sox10 down vs E11.5 * Ctrl |
| 10455761 Prdm6         | NM_001033281  | 2.36404e-005 | -2.21542 | E11.5 * Sox10 down vs E11.5 * Ctrl |
| 10502863 Ak5           | NM_001081277  | 3.18677e-008 | -2.21621 | E11.5 * Sox10 down vs E11.5 * Ctrl |
| 10357833 Atp2b4        | NM_213616     | 3.30002e-008 | -2.21768 | E11.5 * Sox10 down vs E11.5 * Ctrl |
| 10344990 Crisp1d1      | NM_031402     | 3.05032e-010 | -2.21928 | E11.5 * Sox10 down vs E11.5 * Ctrl |
| 10477600               | ---           | 1.56115e-009 | -2.21971 | E11.5 * Sox10 down vs E11.5 * Ctrl |
| 10540207 Adamts9       | ENSMUST000001 | 2.82405e-007 | -2.22009 | E11.5 * Sox10 down vs E11.5 * Ctrl |
| 10601980 Mum1l1        | NM_175541     | 4.70328e-006 | -2.23071 | E11.5 * Sox10 down vs E11.5 * Ctrl |
| 10559207 Lsp1          | NM_019391     | 2.24704e-007 | -2.23162 | E11.5 * Sox10 down vs E11.5 * Ctrl |
| 10396402 Prkch         | NM_008856     | 4.17419e-008 | -2.23274 | E11.5 * Sox10 down vs E11.5 * Ctrl |
| 10380637 Hoxb6         | NM_008269     | 6.88889e-009 | -2.23401 | E11.5 * Sox10 down vs E11.5 * Ctrl |
| 10440091 Col8a1        | NM_007739     | 4.25903e-005 | -2.23813 | E11.5 * Sox10 down vs E11.5 * Ctrl |
| 10400143 Stxbp6        | NM_144552     | 9.5608e-008  | -2.24053 | E11.5 * Sox10 down vs E11.5 * Ctrl |
| 10423556 Pgcp          | NM_018755     | 1.0067e-007  | -2.24256 | E11.5 * Sox10 down vs E11.5 * Ctrl |
| 10592420 AW551984      | NM_178737     | 3.12443e-009 | -2.24285 | E11.5 * Sox10 down vs E11.5 * Ctrl |
| 10355403 Fn1           | NM_010233     | 2.37789e-007 | -2.24362 | E11.5 * Sox10 down vs E11.5 * Ctrl |
| 10356995               | ---           | 5.90219e-006 | -2.24476 | E11.5 * Sox10 down vs E11.5 * Ctrl |
| 10502240 Npnt          | NM_033525     | 3.7407e-007  | -2.24613 | E11.5 * Sox10 down vs E11.5 * Ctrl |
| 10354374 Slc40a1       | NM_016917     | 8.42255e-008 | -2.24706 | E11.5 * Sox10 down vs E11.5 * Ctrl |
| 10497608 Mds1          | NM_021442     | 8.75332e-007 | -2.24714 | E11.5 * Sox10 down vs E11.5 * Ctrl |
| 10501802 Tmem56        | NM_178936     | 4.79407e-008 | -2.24731 | E11.5 * Sox10 down vs E11.5 * Ctrl |
| 10495794 Pde5a         | NM_153422     | 3.01865e-012 | -2.24951 | E11.5 * Sox10 down vs E11.5 * Ctrl |
| 10599581 2610018G03Rik | NM_133729     | 1.40731e-009 | -2.24991 | E11.5 * Sox10 down vs E11.5 * Ctrl |
| 10586118 Calml4        | NM_138304     | 0.000418871  | -2.2513  | E11.5 * Sox10 down vs E11.5 * Ctrl |
| 10363762 Tmem26        | NM_177794     | 5.70697e-008 | -2.25184 | E11.5 * Sox10 down vs E11.5 * Ctrl |
| 10606366 Zcchc5        | NM_199468     | 8.52836e-006 | -2.25201 | E11.5 * Sox10 down vs E11.5 * Ctrl |
| 10440099 St3gal6       | NM_018784     | 7.83215e-008 | -2.25337 | E11.5 * Sox10 down vs E11.5 * Ctrl |
| 10514255 Ml1t3         | NM_027326     | 4.30989e-012 | -2.25498 | E11.5 * Sox10 down vs E11.5 * Ctrl |
| 10353213 Msc           | NM_010827     | 3.52102e-007 | -2.25605 | E11.5 * Sox10 down vs E11.5 * Ctrl |
| 10514275 Ptplad2       | NM_025760     | 1.48901e-006 | -2.25746 | E11.5 * Sox10 down vs E11.5 * Ctrl |
| 10500276 BC028528      | BC028528      | 2.5254e-009  | -2.25834 | E11.5 * Sox10 down vs E11.5 * Ctrl |
| 10352152 Kif26b        | NM_177757     | 1.94751e-007 | -2.26085 | E11.5 * Sox10 down vs E11.5 * Ctrl |
| 10501586 S1pr1         | NM_007901     | 2.43504e-006 | -2.26224 | E11.5 * Sox10 down vs E11.5 * Ctrl |
| 10375360 Ebf1          | NM_007897     | 5.4394e-006  | -2.26523 | E11.5 * Sox10 down vs E11.5 * Ctrl |
| 10595633 Bcl2a1d       | NM_007536     | 6.99196e-007 | -2.26745 | E11.5 * Sox10 down vs E11.5 * Ctrl |
| 10591125 Fat3          | NM_001080814  | 1.71452e-005 | -2.26747 | E11.5 * Sox10 down vs E11.5 * Ctrl |
| 10570957 Sfrp1         | NM_013834     | 1.27701e-006 | -2.26767 | E11.5 * Sox10 down vs E11.5 * Ctrl |
| 10419154 Ear1          | NM_007894     | 1.04868e-005 | -2.27489 | E11.5 * Sox10 down vs E11.5 * Ctrl |
| 10384458 Plek          | NM_019549     | 4.25547e-006 | -2.27687 | E11.5 * Sox10 down vs E11.5 * Ctrl |
| 10413928 1810011H11Rik | AK007434      | 1.06926e-005 | -2.27689 | E11.5 * Sox10 down vs E11.5 * Ctrl |
| 10543306 Tspan12       | NM_173007     | 5.01546e-008 | -2.2775  | E11.5 * Sox10 down vs E11.5 * Ctrl |
| 10442087 4930546H06Rik | BC171984      | 3.6747e-007  | -2.28397 | E11.5 * Sox10 down vs E11.5 * Ctrl |
| 10604347 Smarca1       | NM_053123     | 2.11655e-008 | -2.28565 | E11.5 * Sox10 down vs E11.5 * Ctrl |
| 10506031 Nfia          | NM_010905     | 1.64048e-006 | -2.28695 | E11.5 * Sox10 down vs E11.5 * Ctrl |
| 10463070 Entpd1        | NM_009848     | 1.45489e-005 | -2.28782 | E11.5 * Sox10 down vs E11.5 * Ctrl |
| 10597743 Cx3cr1        | NM_009987     | 3.19929e-006 | -2.29192 | E11.5 * Sox10 down vs E11.5 * Ctrl |
| 10453394 Six2          | NM_011380     | 8.48346e-009 | -2.29369 | E11.5 * Sox10 down vs E11.5 * Ctrl |
| 10410931 Vcan          | NM_001081249  | 1.99732e-008 | -2.29651 | E11.5 * Sox10 down vs E11.5 * Ctrl |
| 10456046 Pdgrfb        | NM_001146268  | 3.64508e-007 | -2.29693 | E11.5 * Sox10 down vs E11.5 * Ctrl |
| 10372028 Plxnc1        | NM_018797     | 9.14385e-010 | -2.30939 | E11.5 * Sox10 down vs E11.5 * Ctrl |
| 10374333 Ikzf1         | NM_001025597  | 8.24895e-008 | -2.31308 | E11.5 * Sox10 down vs E11.5 * Ctrl |
| 10576046 Foxf1a        | NM_010426     | 8.91855e-006 | -2.31538 | E11.5 * Sox10 down vs E11.5 * Ctrl |
| 10502778 Lphn2         | NM_001081298  | 6.01851e-007 | -2.31962 | E11.5 * Sox10 down vs E11.5 * Ctrl |
| 10436596 2810055G20Rik | ENSMUST000001 | 3.18802e-007 | -2.32198 | E11.5 * Sox10 down vs E11.5 * Ctrl |
| 10454172 Dsg2          | NM_007883     | 4.85209e-007 | -2.32287 | E11.5 * Sox10 down vs E11.5 * Ctrl |
| 10434802 Lpp           | BC005613      | 1.05612e-005 | -2.32402 | E11.5 * Sox10 down vs E11.5 * Ctrl |
| 10549877               | ---           | 2.82928e-006 | -2.32554 | E11.5 * Sox10 down vs E11.5 * Ctrl |
| 10556076 Olfml1        | NM_172907     | 1.48006e-006 | -2.33577 | E11.5 * Sox10 down vs E11.5 * Ctrl |
| 10543239 Tcfec         | NM_031198     | 1.70946e-005 | -2.33733 | E11.5 * Sox10 down vs E11.5 * Ctrl |
| 10601993 D330045A20Rik | NM_175326     | 6.6754e-007  | -2.35801 | E11.5 * Sox10 down vs E11.5 * Ctrl |
| 10399801 Sntg2         | NM_172951     | 3.49514e-008 | -2.35862 | E11.5 * Sox10 down vs E11.5 * Ctrl |
| 10502748 Lphn2         | NM_001081298  | 9.99703e-011 | -2.36658 | E11.5 * Sox10 down vs E11.5 * Ctrl |

|                        |               |              |          |                                    |
|------------------------|---------------|--------------|----------|------------------------------------|
| 10409061               | ---           | 0.000109714  | -2.36697 | E11.5 * Sox10 down vs E11.5 * Ctrl |
| 10587683 Bcl2a1a       | NM_009742     | 1.48819e-005 | -2.36897 | E11.5 * Sox10 down vs E11.5 * Ctrl |
| 10555297 Kcne3         | NM_020574     | 1.17652e-008 | -2.37227 | E11.5 * Sox10 down vs E11.5 * Ctrl |
| 10409876 Ctla2a        | NM_007796     | 5.98717e-005 | -2.37879 | E11.5 * Sox10 down vs E11.5 * Ctrl |
| 10519998 Lrrc17        | NM_028977     | 1.06498e-008 | -2.38152 | E11.5 * Sox10 down vs E11.5 * Ctrl |
| 10467124 Acta2         | NM_007392     | 0.00421763   | -2.38552 | E11.5 * Sox10 down vs E11.5 * Ctrl |
| 10460541 Cd248         | NM_054042     | 1.12711e-006 | -2.38634 | E11.5 * Sox10 down vs E11.5 * Ctrl |
| 10521700 ENSMUSG00000C | ENSMUST000000 | 0.000120829  | -2.38981 | E11.5 * Sox10 down vs E11.5 * Ctrl |
| 10406845 Foxd1         | NM_008242     | 0.000289591  | -2.39434 | E11.5 * Sox10 down vs E11.5 * Ctrl |
| 10506820               | ---           | 0.000136515  | -2.39434 | E11.5 * Sox10 down vs E11.5 * Ctrl |
| 10435501 Stfa1         | NM_001082543  | 1.21824e-006 | -2.39698 | E11.5 * Sox10 down vs E11.5 * Ctrl |
| 10499132 Mab21l2       | NM_011839     | 1.89498e-006 | -2.39725 | E11.5 * Sox10 down vs E11.5 * Ctrl |
| 10587446 Myo6          | NM_001039546  | 3.15806e-008 | -2.39792 | E11.5 * Sox10 down vs E11.5 * Ctrl |
| 10546736 Cntn3         | NM_008779     | 3.20215e-007 | -2.40048 | E11.5 * Sox10 down vs E11.5 * Ctrl |
| 10545101 Ptgds2        | NM_019455     | 1.5193e-006  | -2.4044  | E11.5 * Sox10 down vs E11.5 * Ctrl |
| 10407350 Fgf10         | NM_008002     | 3.65886e-007 | -2.40704 | E11.5 * Sox10 down vs E11.5 * Ctrl |
| 10453049 Cdc42ep3      | NM_026514     | 1.85236e-006 | -2.40989 | E11.5 * Sox10 down vs E11.5 * Ctrl |
| 10583529 Icam4         | NM_023892     | 2.45934e-009 | -2.41378 | E11.5 * Sox10 down vs E11.5 * Ctrl |
| 10586744 Anxa2         | NM_007585     | 1.34737e-005 | -2.41641 | E11.5 * Sox10 down vs E11.5 * Ctrl |
| 10453747 Colec12       | NM_130449     | 3.01559e-007 | -2.42358 | E11.5 * Sox10 down vs E11.5 * Ctrl |
| 10513774               | ---           | 2.68622e-007 | -2.42488 | E11.5 * Sox10 down vs E11.5 * Ctrl |
| 10346015 Col3a1        | NM_009930     | 1.20446e-008 | -2.42787 | E11.5 * Sox10 down vs E11.5 * Ctrl |
| 10498018 Pcdh18        | NM_130448     | 3.99316e-010 | -2.43078 | E11.5 * Sox10 down vs E11.5 * Ctrl |
| 10453057 Cyp1b1        | NM_009994     | 1.10635e-006 | -2.43104 | E11.5 * Sox10 down vs E11.5 * Ctrl |
| 10360398 Ifi202b       | NM_008327     | 5.67398e-005 | -2.4343  | E11.5 * Sox10 down vs E11.5 * Ctrl |
| 10535807 Flt1          | NM_010228     | 1.49221e-011 | -2.4351  | E11.5 * Sox10 down vs E11.5 * Ctrl |
| 10504203 4930578G10Rik | ENSMUST000000 | 0.00254902   | -2.43738 | E11.5 * Sox10 down vs E11.5 * Ctrl |
| 10395409 Meox2         | NM_008584     | 2.16078e-005 | -2.43794 | E11.5 * Sox10 down vs E11.5 * Ctrl |
| 10564818 Anpep         | NM_008486     | 2.19877e-005 | -2.43844 | E11.5 * Sox10 down vs E11.5 * Ctrl |
| 10406736 F2rl2         | NM_010170     | 4.15465e-007 | -2.43844 | E11.5 * Sox10 down vs E11.5 * Ctrl |
| 10531203 Adamts3       | NM_001081401  | 1.25339e-007 | -2.46311 | E11.5 * Sox10 down vs E11.5 * Ctrl |
| 10498119 Frem2         | NM_172862     | 1.22678e-007 | -2.46472 | E11.5 * Sox10 down vs E11.5 * Ctrl |
| 10396936 Smoc1         | NM_001146217  | 1.0951e-006  | -2.46491 | E11.5 * Sox10 down vs E11.5 * Ctrl |
| 10501903 Synpo2        | NM_080451     | 8.65846e-008 | -2.46973 | E11.5 * Sox10 down vs E11.5 * Ctrl |
| 10446282 Emr1          | NM_010130     | 1.36078e-006 | -2.4773  | E11.5 * Sox10 down vs E11.5 * Ctrl |
| 10542594 ENSMUSG00000C | AY512955      | 7.01513e-007 | -2.48293 | E11.5 * Sox10 down vs E11.5 * Ctrl |
| 10545409 Vamp8         | NM_016794     | 1.22589e-007 | -2.48402 | E11.5 * Sox10 down vs E11.5 * Ctrl |
| 10360415 Grem2         | NM_011825     | 2.80925e-008 | -2.486   | E11.5 * Sox10 down vs E11.5 * Ctrl |
| 10455919 Adamts19      | NM_175506     | 6.56649e-009 | -2.49136 | E11.5 * Sox10 down vs E11.5 * Ctrl |
| 10506488 Ppap2b        | NM_080555     | 2.38314e-006 | -2.4917  | E11.5 * Sox10 down vs E11.5 * Ctrl |
| 10453857 Gata6         | NM_010258     | 9.12501e-007 | -2.49266 | E11.5 * Sox10 down vs E11.5 * Ctrl |
| 10538126 Gimap4        | NM_174990     | 5.84595e-007 | -2.49495 | E11.5 * Sox10 down vs E11.5 * Ctrl |
| 10362091 Raet1d        | NM_020030     | 0.000106747  | -2.49761 | E11.5 * Sox10 down vs E11.5 * Ctrl |
| 10445046 Trim10        | NM_011280     | 1.03144e-009 | -2.49982 | E11.5 * Sox10 down vs E11.5 * Ctrl |
| 10427286 Hoxc9         | NM_008272     | 2.52793e-009 | -2.50049 | E11.5 * Sox10 down vs E11.5 * Ctrl |
| 10344952 Rdh10         | NM_133832     | 4.19741e-005 | -2.50067 | E11.5 * Sox10 down vs E11.5 * Ctrl |
| 10386996 Myocd         | NM_145136     | 3.55655e-007 | -2.50393 | E11.5 * Sox10 down vs E11.5 * Ctrl |
| 10514070 2310067E19Rik | BC066147      | 4.65142e-007 | -2.50791 | E11.5 * Sox10 down vs E11.5 * Ctrl |
| 10362314 Ptpkr         | NM_008983     | 1.36288e-010 | -2.51391 | E11.5 * Sox10 down vs E11.5 * Ctrl |
| 10415396 Nfatc4        | NM_023699     | 3.03886e-008 | -2.52823 | E11.5 * Sox10 down vs E11.5 * Ctrl |
| 10503054 Lrrc7         | NM_001081358  | 7.20777e-005 | -2.53663 | E11.5 * Sox10 down vs E11.5 * Ctrl |
| 10358434 Pla2g4a       | NM_008869     | 1.92848e-007 | -2.54261 | E11.5 * Sox10 down vs E11.5 * Ctrl |
| 10376778 Mfap4         | NM_029568     | 1.25095e-008 | -2.54442 | E11.5 * Sox10 down vs E11.5 * Ctrl |
| 10584593               | ---           | 5.3889e-006  | -2.54681 | E11.5 * Sox10 down vs E11.5 * Ctrl |
| 10566358 Trim30        | NM_009099     | 1.11826e-006 | -2.54851 | E11.5 * Sox10 down vs E11.5 * Ctrl |
| 10551736 Ppp1r14a      | NM_026731     | 2.51084e-005 | -2.54975 | E11.5 * Sox10 down vs E11.5 * Ctrl |
| 10604528 Mbnl3         | NM_134163     | 1.47275e-007 | -2.55022 | E11.5 * Sox10 down vs E11.5 * Ctrl |
| 10502780 Lphn2         | NM_001081298  | 1.33953e-010 | -2.55262 | E11.5 * Sox10 down vs E11.5 * Ctrl |
| 10487040 Fbn1          | NM_007993     | 6.77274e-009 | -2.55811 | E11.5 * Sox10 down vs E11.5 * Ctrl |
| 10362113 ENSMUSG00000C | ENSMUST000000 | 4.33184e-007 | -2.55903 | E11.5 * Sox10 down vs E11.5 * Ctrl |
| 10537298 Chr2          | NM_203491     | 9.0529e-005  | -2.56427 | E11.5 * Sox10 down vs E11.5 * Ctrl |
| 10578264 Msr1          | NM_031195     | 1.24785e-007 | -2.57151 | E11.5 * Sox10 down vs E11.5 * Ctrl |
| 10577641 1810011O10Rik | NM_026931     | 2.13627e-005 | -2.57246 | E11.5 * Sox10 down vs E11.5 * Ctrl |
| 10359861 Mgst3         | NM_025569     | 2.32075e-007 | -2.59833 | E11.5 * Sox10 down vs E11.5 * Ctrl |
| 10458828 Cdo1          | NM_033037     | 4.7578e-009  | -2.60381 | E11.5 * Sox10 down vs E11.5 * Ctrl |
| 10591116 Fat3          | NM_001080814  | 2.5253e-009  | -2.60504 | E11.5 * Sox10 down vs E11.5 * Ctrl |

|                        |               |              |          |                                    |
|------------------------|---------------|--------------|----------|------------------------------------|
| 10485840 Ryr3          | NM_177652     | 1.40591e-012 | -2.60747 | E11.5 * Sox10 down vs E11.5 * Ctrl |
| 10392221 Pecam1        | NM_008816     | 1.70567e-008 | -2.61588 | E11.5 * Sox10 down vs E11.5 * Ctrl |
| 10578123 Rbpms         | NM_019733     | 1.93986e-010 | -2.61654 | E11.5 * Sox10 down vs E11.5 * Ctrl |
| 10565204 Bnc1          | NM_007562     | 1.85874e-008 | -2.63013 | E11.5 * Sox10 down vs E11.5 * Ctrl |
| 10606355 Cysltr1       | NM_021476     | 2.73361e-008 | -2.63076 | E11.5 * Sox10 down vs E11.5 * Ctrl |
| 10529875 Ldb2          | NM_001077398  | 1.37065e-008 | -2.63277 | E11.5 * Sox10 down vs E11.5 * Ctrl |
| 10398366               | ---           | 0.000299326  | -2.6334  | E11.5 * Sox10 down vs E11.5 * Ctrl |
| 10581961 Adamts18      | NM_172466     | 5.42924e-008 | -2.64294 | E11.5 * Sox10 down vs E11.5 * Ctrl |
| 10506108               | ---           | 0.000193106  | -2.64378 | E11.5 * Sox10 down vs E11.5 * Ctrl |
| 10355500 Igfbp5        | NM_010518     | 5.38766e-007 | -2.65019 | E11.5 * Sox10 down vs E11.5 * Ctrl |
| 10495685 Arhgap29      | NM_172525     | 6.35188e-007 | -2.65382 | E11.5 * Sox10 down vs E11.5 * Ctrl |
| 10509002 Rhd           | NM_011270     | 1.36584e-009 | -2.65579 | E11.5 * Sox10 down vs E11.5 * Ctrl |
| 10572130 Lpl           | NM_008509     | 2.25204e-009 | -2.6669  | E11.5 * Sox10 down vs E11.5 * Ctrl |
| 10347724 Slc4a3        | ENSMUST000001 | 0.00100598   | -2.66841 | E11.5 * Sox10 down vs E11.5 * Ctrl |
| 10515848 Ermap         | NM_013848     | 1.02184e-009 | -2.67011 | E11.5 * Sox10 down vs E11.5 * Ctrl |
| 10412260 Fst           | NM_008046     | 1.33112e-007 | -2.67296 | E11.5 * Sox10 down vs E11.5 * Ctrl |
| 10427336 Nckap1l       | NM_153505     | 4.20591e-007 | -2.67643 | E11.5 * Sox10 down vs E11.5 * Ctrl |
| 10559816               | ---           | 2.06728e-007 | -2.68817 | E11.5 * Sox10 down vs E11.5 * Ctrl |
| 10486664 Epb4.2        | NM_013513     | 2.46991e-008 | -2.69106 | E11.5 * Sox10 down vs E11.5 * Ctrl |
| 10408525 1700018A04Rik | ENSMUST000001 | 6.67698e-009 | -2.69371 | E11.5 * Sox10 down vs E11.5 * Ctrl |
| 10441864 Mllt4         | NM_010806     | 1.50553e-012 | -2.7008  | E11.5 * Sox10 down vs E11.5 * Ctrl |
| 10434804               | ---           | 0.000612775  | -2.70422 | E11.5 * Sox10 down vs E11.5 * Ctrl |
| 10543959 Ptn           | NM_008973     | 6.36437e-008 | -2.7051  | E11.5 * Sox10 down vs E11.5 * Ctrl |
| 10571601 Pdlim3        | NM_016798     | 1.26572e-009 | -2.71025 | E11.5 * Sox10 down vs E11.5 * Ctrl |
| 10352867 Plxna2        | NM_008882     | 2.12441e-010 | -2.71878 | E11.5 * Sox10 down vs E11.5 * Ctrl |
| 10606016 Il2rg         | NM_013563     | 1.18847e-006 | -2.72247 | E11.5 * Sox10 down vs E11.5 * Ctrl |
| 10467838               | ---           | 2.12865e-005 | -2.72333 | E11.5 * Sox10 down vs E11.5 * Ctrl |
| 10374366 Egfr          | NM_207655     | 1.40752e-008 | -2.73099 | E11.5 * Sox10 down vs E11.5 * Ctrl |
| 10423548 Sdc2          | NM_008304     | 1.99026e-008 | -2.73266 | E11.5 * Sox10 down vs E11.5 * Ctrl |
| 10351455 Rgs5          | NM_009063     | 6.40771e-006 | -2.73284 | E11.5 * Sox10 down vs E11.5 * Ctrl |
| 10548879 Mgp           | NM_008597     | 5.78146e-007 | -2.74468 | E11.5 * Sox10 down vs E11.5 * Ctrl |
| 10569335 H19           | NR_001592     | 7.61576e-005 | -2.74774 | E11.5 * Sox10 down vs E11.5 * Ctrl |
| 10421172 Slc25a37      | NM_026331     | 7.01143e-008 | -2.75085 | E11.5 * Sox10 down vs E11.5 * Ctrl |
| 10517513 C1qc          | NM_007574     | 8.93656e-008 | -2.75856 | E11.5 * Sox10 down vs E11.5 * Ctrl |
| 10559796 Peg3          | NM_008817     | 2.5209e-007  | -2.75952 | E11.5 * Sox10 down vs E11.5 * Ctrl |
| 10499870 Lor           | NM_008508     | 6.30175e-006 | -2.76228 | E11.5 * Sox10 down vs E11.5 * Ctrl |
| 10564527 Nr2f2         | NM_009697     | 1.42555e-011 | -2.76843 | E11.5 * Sox10 down vs E11.5 * Ctrl |
| 10605503               | ---           | 0.000455694  | -2.77277 | E11.5 * Sox10 down vs E11.5 * Ctrl |
| 10412345 Parp8         | NM_001081009  | 3.11181e-009 | -2.7801  | E11.5 * Sox10 down vs E11.5 * Ctrl |
| 10575034 Cdh3          | NM_001037809  | 6.57982e-008 | -2.78314 | E11.5 * Sox10 down vs E11.5 * Ctrl |
| 10492689 Pdgfc         | NM_019971     | 5.68737e-009 | -2.79235 | E11.5 * Sox10 down vs E11.5 * Ctrl |
| 10602372 Alas2         | NM_009653     | 9.81212e-011 | -2.79492 | E11.5 * Sox10 down vs E11.5 * Ctrl |
| 10546434 Adamts9       | NM_175314     | 1.50859e-007 | -2.79743 | E11.5 * Sox10 down vs E11.5 * Ctrl |
| 10525030 Tbx5          | NM_011537     | 2.52107e-008 | -2.79843 | E11.5 * Sox10 down vs E11.5 * Ctrl |
| 10506050 Nfia          | NM_001122952  | 2.59895e-007 | -2.80574 | E11.5 * Sox10 down vs E11.5 * Ctrl |
| 10348451 Cxcr7         | NM_007722     | 1.09094e-008 | -2.8112  | E11.5 * Sox10 down vs E11.5 * Ctrl |
| 10604393 ENSMUSG0000C  | NM_019680     | 1.12122e-010 | -2.8144  | E11.5 * Sox10 down vs E11.5 * Ctrl |
| 10522288 Shisa3        | NM_001033415  | 3.32772e-010 | -2.8247  | E11.5 * Sox10 down vs E11.5 * Ctrl |
| 10590635 Ccr5          | NM_009917     | 3.82926e-007 | -2.82725 | E11.5 * Sox10 down vs E11.5 * Ctrl |
| 10598013 Ccr5          | NM_009917     | 3.82926e-007 | -2.82725 | E11.5 * Sox10 down vs E11.5 * Ctrl |
| 10408693 F13a1         | NM_028784     | 5.26974e-007 | -2.82958 | E11.5 * Sox10 down vs E11.5 * Ctrl |
| 10484207 2610301F02Rik | NM_001025576  | 9.29233e-012 | -2.83064 | E11.5 * Sox10 down vs E11.5 * Ctrl |
| 10443108 Syngap1       | XM_985548     | 0.00019563   | -2.83725 | E11.5 * Sox10 down vs E11.5 * Ctrl |
| 10456071 Csf1r         | NM_001037859  | 2.33975e-007 | -2.86716 | E11.5 * Sox10 down vs E11.5 * Ctrl |
| 10514054 Nfib          | NM_001113209  | 2.93908e-011 | -2.88383 | E11.5 * Sox10 down vs E11.5 * Ctrl |
| 10351867 Aim2          | NM_001013779  | 1.7108e-006  | -2.88661 | E11.5 * Sox10 down vs E11.5 * Ctrl |
| 10381298 Ramp2         | NM_019444     | 4.52733e-007 | -2.90882 | E11.5 * Sox10 down vs E11.5 * Ctrl |
| 10510239 ENSMUSG0000C  | ENSMUST000001 | 1.40423e-005 | -2.91068 | E11.5 * Sox10 down vs E11.5 * Ctrl |
| 10407122               | ---           | 0.000269605  | -2.91353 | E11.5 * Sox10 down vs E11.5 * Ctrl |
| 10483074 Gcg           | NM_008100     | 1.44795e-007 | -2.92169 | E11.5 * Sox10 down vs E11.5 * Ctrl |
| 10544583 Gimap6        | NM_153175     | 9.22638e-009 | -2.92823 | E11.5 * Sox10 down vs E11.5 * Ctrl |
| 10427290 Hoxc8         | NM_010466     | 1.85395e-007 | -2.93697 | E11.5 * Sox10 down vs E11.5 * Ctrl |
| 10440019 Tmem45a       | NM_019631     | 2.53479e-006 | -2.93831 | E11.5 * Sox10 down vs E11.5 * Ctrl |
| 10571788 Vegfc         | NM_009506     | 1.87247e-007 | -2.94781 | E11.5 * Sox10 down vs E11.5 * Ctrl |
| 10502774 Lphn2         | NM_001081298  | 9.71524e-013 | -2.94966 | E11.5 * Sox10 down vs E11.5 * Ctrl |
| 10594044 Islr          | NM_012043     | 5.66284e-008 | -2.95171 | E11.5 * Sox10 down vs E11.5 * Ctrl |

|                        |              |              |          |                                    |
|------------------------|--------------|--------------|----------|------------------------------------|
| 10358339 Cfh           | NM_009888    | 5.2329e-009  | -2.95632 | E11.5 * Sox10 down vs E11.5 * Ctrl |
| 10502772 Lphn2         | NM_001081298 | 1.94381e-010 | -2.96529 | E11.5 * Sox10 down vs E11.5 * Ctrl |
| 10591131 Fat3          | NM_001080814 | 1.08442e-007 | -2.97806 | E11.5 * Sox10 down vs E11.5 * Ctrl |
| 10469404 Cacnb2        | NM_023116    | 8.19725e-009 | -2.97835 | E11.5 * Sox10 down vs E11.5 * Ctrl |
| 10407286 BC067074      | ENSMUST00000 | 3.73865e-006 | -2.9819  | E11.5 * Sox10 down vs E11.5 * Ctrl |
| 10521972 Pcdh7         | NM_018764    | 7.17362e-011 | -2.98843 | E11.5 * Sox10 down vs E11.5 * Ctrl |
| 10445268 Gpr116        | NM_001081178 | 6.61715e-009 | -3.00667 | E11.5 * Sox10 down vs E11.5 * Ctrl |
| 10351463 Rgs5          | ENSMUST00000 | 9.70918e-005 | -3.00863 | E11.5 * Sox10 down vs E11.5 * Ctrl |
| 10522530 Kit           | NM_001122733 | 2.54806e-010 | -3.00931 | E11.5 * Sox10 down vs E11.5 * Ctrl |
| 10344837 Prex2         | NM_029525    | 1.01463e-008 | -3.01582 | E11.5 * Sox10 down vs E11.5 * Ctrl |
| 10440340               | ---          | 3.47105e-010 | -3.03779 | E11.5 * Sox10 down vs E11.5 * Ctrl |
| 10411235 Iqgap2        | NM_027711    | 2.49647e-008 | -3.0452  | E11.5 * Sox10 down vs E11.5 * Ctrl |
| 10519857 Hgf           | NM_010427    | 3.15301e-010 | -3.05809 | E11.5 * Sox10 down vs E11.5 * Ctrl |
| 10436598 2810055G20Rik | ENSMUST00000 | 0.000488515  | -3.05871 | E11.5 * Sox10 down vs E11.5 * Ctrl |
| 10499189 Fcrls         | NM_030707    | 2.08243e-007 | -3.05877 | E11.5 * Sox10 down vs E11.5 * Ctrl |
| 10372648 Lyz2          | NM_017372    | 1.65798e-007 | -3.07928 | E11.5 * Sox10 down vs E11.5 * Ctrl |
| 10592067 Fli1          | NM_008026    | 9.42107e-009 | -3.08513 | E11.5 * Sox10 down vs E11.5 * Ctrl |
| 10475544 Sema6d        | NM_199241    | 7.4604e-009  | -3.08633 | E11.5 * Sox10 down vs E11.5 * Ctrl |
| 10576051 Foxc2         | NM_013519    | 1.24428e-006 | -3.08681 | E11.5 * Sox10 down vs E11.5 * Ctrl |
| 10350840 Angptl1       | NM_028333    | 1.36757e-008 | -3.09515 | E11.5 * Sox10 down vs E11.5 * Ctrl |
| 10607484 Ptchd1        | NM_001093750 | 3.69989e-006 | -3.10779 | E11.5 * Sox10 down vs E11.5 * Ctrl |
| 10497590 Evi1          | NM_007963    | 6.10792e-008 | -3.11012 | E11.5 * Sox10 down vs E11.5 * Ctrl |
| 10498921 Tdo2          | NM_019911    | 2.02609e-007 | -3.11205 | E11.5 * Sox10 down vs E11.5 * Ctrl |
| 10412335 Isl1          | NM_021459    | 1.10873e-006 | -3.11475 | E11.5 * Sox10 down vs E11.5 * Ctrl |
| 10591127 Fat3          | NM_001080814 | 9.00047e-006 | -3.11824 | E11.5 * Sox10 down vs E11.5 * Ctrl |
| 10594855 Cgnl1         | NM_026599    | 3.9459e-008  | -3.11969 | E11.5 * Sox10 down vs E11.5 * Ctrl |
| 10402705 Gm266         | NM_001033248 | 3.6787e-007  | -3.12801 | E11.5 * Sox10 down vs E11.5 * Ctrl |
| 10568553 4631426J05Rik | NM_029935    | 4.36021e-008 | -3.13554 | E11.5 * Sox10 down vs E11.5 * Ctrl |
| 10351111 Dnm3os        | NR_002870    | 1.067e-008   | -3.14558 | E11.5 * Sox10 down vs E11.5 * Ctrl |
| 10404404 Foxf2         | NM_010225    | 3.52861e-008 | -3.15483 | E11.5 * Sox10 down vs E11.5 * Ctrl |
| 10517165 Cd52          | NM_013706    | 3.22209e-007 | -3.16403 | E11.5 * Sox10 down vs E11.5 * Ctrl |
| 10591118 Fat3          | NM_001080814 | 1.43546e-006 | -3.16734 | E11.5 * Sox10 down vs E11.5 * Ctrl |
| 10427293 Hoxc6         | NM_010465    | 1.80074e-006 | -3.17138 | E11.5 * Sox10 down vs E11.5 * Ctrl |
| 10601569 Pcdh11x       | NM_001081385 | 2.89613e-005 | -3.17723 | E11.5 * Sox10 down vs E11.5 * Ctrl |
| 10467840 C130021O09Rik | AK081501     | 7.88925e-006 | -3.17739 | E11.5 * Sox10 down vs E11.5 * Ctrl |
| 10496872 Eltd1         | NM_133222    | 1.97244e-006 | -3.17902 | E11.5 * Sox10 down vs E11.5 * Ctrl |
| 10472953 Hoxd11        | NM_008273    | 1.64043e-007 | -3.19536 | E11.5 * Sox10 down vs E11.5 * Ctrl |
| 10607848 Egfl6         | NM_019397    | 7.63531e-007 | -3.20978 | E11.5 * Sox10 down vs E11.5 * Ctrl |
| 10398364               | ---          | 1.75385e-006 | -3.2146  | E11.5 * Sox10 down vs E11.5 * Ctrl |
| 10591123 Fat3          | NM_001080814 | 5.81538e-006 | -3.21517 | E11.5 * Sox10 down vs E11.5 * Ctrl |
| 10436600               | ---          | 0.000598139  | -3.21568 | E11.5 * Sox10 down vs E11.5 * Ctrl |
| 10361771 Plagl1        | NM_009538    | 3.46132e-007 | -3.21717 | E11.5 * Sox10 down vs E11.5 * Ctrl |
| 10514185               | ---          | 0.000518858  | -3.21751 | E11.5 * Sox10 down vs E11.5 * Ctrl |
| 10413482 Wnt5a         | NM_009524    | 2.48463e-007 | -3.22622 | E11.5 * Sox10 down vs E11.5 * Ctrl |
| 10513957 Ptprd         | NM_011211    | 5.63496e-013 | -3.23109 | E11.5 * Sox10 down vs E11.5 * Ctrl |
| 10492798 Sfrp2         | NM_009144    | 2.95316e-011 | -3.23198 | E11.5 * Sox10 down vs E11.5 * Ctrl |
| 10584561 9030425E11Rik | NM_133733    | 1.66147e-006 | -3.23373 | E11.5 * Sox10 down vs E11.5 * Ctrl |
| 10428707 Has2          | NM_008216    | 1.08712e-009 | -3.23551 | E11.5 * Sox10 down vs E11.5 * Ctrl |
| 10514049 Nfib          | NM_001113209 | 9.01572e-012 | -3.23689 | E11.5 * Sox10 down vs E11.5 * Ctrl |
| 10484201 2610301F02Rik | ENSMUST00000 | 1.39215e-007 | -3.25064 | E11.5 * Sox10 down vs E11.5 * Ctrl |
| 10491319 Kcnmb2        | NM_028231    | 1.96112e-008 | -3.25467 | E11.5 * Sox10 down vs E11.5 * Ctrl |
| 10531931 Sparcl1       | NM_010097    | 2.0376e-009  | -3.26301 | E11.5 * Sox10 down vs E11.5 * Ctrl |
| 10513101               | ---          | 8.93207e-007 | -3.28703 | E11.5 * Sox10 down vs E11.5 * Ctrl |
| 10505954 Tek           | NM_013690    | 3.06553e-009 | -3.29116 | E11.5 * Sox10 down vs E11.5 * Ctrl |
| 10604585               | ---          | 9.68827e-009 | -3.29427 | E11.5 * Sox10 down vs E11.5 * Ctrl |
| 10422436 Dock9         | NM_001081039 | 6.99913e-011 | -3.29552 | E11.5 * Sox10 down vs E11.5 * Ctrl |
| 10472965 Hoxd8         | NM_008276    | 1.7017e-008  | -3.30409 | E11.5 * Sox10 down vs E11.5 * Ctrl |
| 10513739 Tnc           | NM_011607    | 1.36137e-008 | -3.30861 | E11.5 * Sox10 down vs E11.5 * Ctrl |
| 10488382 Cd93          | NM_010740    | 2.56259e-008 | -3.32172 | E11.5 * Sox10 down vs E11.5 * Ctrl |
| 10569017 Ifitm3        | NM_025378    | 2.08152e-005 | -3.33103 | E11.5 * Sox10 down vs E11.5 * Ctrl |
| 10398380               | ---          | 9.79298e-006 | -3.3562  | E11.5 * Sox10 down vs E11.5 * Ctrl |
| 10523376 Fras1         | NM_175473    | 3.26748e-009 | -3.37043 | E11.5 * Sox10 down vs E11.5 * Ctrl |
| 10591739 Acp5          | NM_001102404 | 1.26955e-009 | -3.37193 | E11.5 * Sox10 down vs E11.5 * Ctrl |
| 10447190 Plekhh2       | NM_177606    | 5.41986e-011 | -3.37465 | E11.5 * Sox10 down vs E11.5 * Ctrl |
| 10558769 Ifitm1        | NM_026820    | 7.17002e-008 | -3.3898  | E11.5 * Sox10 down vs E11.5 * Ctrl |
| 10584595 2610203C20Rik | ENSMUST00000 | 2.51723e-007 | -3.39918 | E11.5 * Sox10 down vs E11.5 * Ctrl |

|          |               |              |              |          |                                    |
|----------|---------------|--------------|--------------|----------|------------------------------------|
| 10376956 | Hs3st3a1      | NM_178870    | 4.04455e-008 | -3.40817 | E11.5 * Sox10 down vs E11.5 * Ctrl |
| 10483800 | ---           | ---          | 5.60728e-008 | -3.41125 | E11.5 * Sox10 down vs E11.5 * Ctrl |
| 10501063 | Cd53          | NM_007651    | 7.70441e-008 | -3.41136 | E11.5 * Sox10 down vs E11.5 * Ctrl |
| 10496324 | Slc39a8       | NM_001135149 | 7.40252e-010 | -3.41397 | E11.5 * Sox10 down vs E11.5 * Ctrl |
| 10534389 | Cldn13        | NM_020504    | 7.49367e-007 | -3.41423 | E11.5 * Sox10 down vs E11.5 * Ctrl |
| 10424105 | Colec10       | NM_173422    | 5.31113e-011 | -3.43785 | E11.5 * Sox10 down vs E11.5 * Ctrl |
| 10581013 | Cdh11         | NM_009866    | 1.08282e-009 | -3.4405  | E11.5 * Sox10 down vs E11.5 * Ctrl |
| 10391649 | Slc4a1        | NM_011403    | 1.46446e-011 | -3.44292 | E11.5 * Sox10 down vs E11.5 * Ctrl |
| 10352905 | Cd34          | NM_001111059 | 7.48589e-008 | -3.44391 | E11.5 * Sox10 down vs E11.5 * Ctrl |
| 10398354 | ---           | ---          | 3.48284e-006 | -3.44973 | E11.5 * Sox10 down vs E11.5 * Ctrl |
| 10473399 | Prg2          | NM_008920    | 6.50819e-008 | -3.45448 | E11.5 * Sox10 down vs E11.5 * Ctrl |
| 10346164 | Sdpr          | NM_138741    | 4.92592e-008 | -3.46645 | E11.5 * Sox10 down vs E11.5 * Ctrl |
| 10376326 | Irgm2         | NM_019440    | 5.34099e-010 | -3.47667 | E11.5 * Sox10 down vs E11.5 * Ctrl |
| 10548038 | Ntf3          | NM_008742    | 1.47909e-008 | -3.49261 | E11.5 * Sox10 down vs E11.5 * Ctrl |
| 10542575 | Pde3a         | NM_018779    | 2.75031e-007 | -3.49962 | E11.5 * Sox10 down vs E11.5 * Ctrl |
| 10503382 | Runx1t1       | NM_001111027 | 2.51554e-008 | -3.50701 | E11.5 * Sox10 down vs E11.5 * Ctrl |
| 10344897 | Sulf1         | NM_172294    | 1.07412e-007 | -3.51502 | E11.5 * Sox10 down vs E11.5 * Ctrl |
| 10584600 | ---           | ---          | 2.78912e-008 | -3.54952 | E11.5 * Sox10 down vs E11.5 * Ctrl |
| 10419151 | Ear1          | NM_007894    | 5.75723e-006 | -3.58525 | E11.5 * Sox10 down vs E11.5 * Ctrl |
| 10553274 | Saa2          | NM_011314    | 5.22695e-007 | -3.59022 | E11.5 * Sox10 down vs E11.5 * Ctrl |
| 10349648 | Ctse          | NM_007799    | 8.81167e-011 | -3.59515 | E11.5 * Sox10 down vs E11.5 * Ctrl |
| 10368495 | Rspo3         | NM_028351    | 3.40902e-011 | -3.5973  | E11.5 * Sox10 down vs E11.5 * Ctrl |
| 10519717 | Sema3a        | NM_009152    | 3.69311e-009 | -3.59956 | E11.5 * Sox10 down vs E11.5 * Ctrl |
| 10358224 | Ptpcr         | NM_001111316 | 1.19795e-007 | -3.63818 | E11.5 * Sox10 down vs E11.5 * Ctrl |
| 10493831 | S100a8        | NM_013650    | 3.05022e-006 | -3.66497 | E11.5 * Sox10 down vs E11.5 * Ctrl |
| 10523134 | Pf4           | NM_019932    | 6.12227e-007 | -3.6731  | E11.5 * Sox10 down vs E11.5 * Ctrl |
| 10380174 | Mpo           | NM_010824    | 2.41574e-011 | -3.70399 | E11.5 * Sox10 down vs E11.5 * Ctrl |
| 10366153 | Rassf9        | NM_146240    | 1.0052e-008  | -3.71499 | E11.5 * Sox10 down vs E11.5 * Ctrl |
| 10498935 | Gucy1b3       | NM_017469    | 3.36468e-007 | -3.73139 | E11.5 * Sox10 down vs E11.5 * Ctrl |
| 10362674 | Rnu3a         | NR_002842    | 6.35727e-005 | -3.73733 | E11.5 * Sox10 down vs E11.5 * Ctrl |
| 10554789 | Ctsc          | NM_009982    | 8.00992e-009 | -3.74324 | E11.5 * Sox10 down vs E11.5 * Ctrl |
| 10355893 | Epha4         | NM_007936    | 2.45549e-011 | -3.77061 | E11.5 * Sox10 down vs E11.5 * Ctrl |
| 10405179 | S1pr3         | NM_010101    | 3.25685e-011 | -3.77632 | E11.5 * Sox10 down vs E11.5 * Ctrl |
| 10591129 | Fat3          | NM_001080814 | 6.76641e-006 | -3.77842 | E11.5 * Sox10 down vs E11.5 * Ctrl |
| 10498653 | 1110032A04Rik | NM_133675    | 2.63229e-007 | -3.78776 | E11.5 * Sox10 down vs E11.5 * Ctrl |
| 10423971 | Pkhd1l1       | NM_138674    | 6.26841e-016 | -3.81836 | E11.5 * Sox10 down vs E11.5 * Ctrl |
| 10536444 | Foxp2         | NM_053242    | 7.11971e-010 | -3.82555 | E11.5 * Sox10 down vs E11.5 * Ctrl |
| 10405587 | Tgfb1         | NM_009369    | 3.33262e-008 | -3.82603 | E11.5 * Sox10 down vs E11.5 * Ctrl |
| 10603551 | Cybb          | NM_007807    | 2.10708e-007 | -3.82733 | E11.5 * Sox10 down vs E11.5 * Ctrl |
| 10369842 | ---           | ---          | 1.1944e-005  | -3.84918 | E11.5 * Sox10 down vs E11.5 * Ctrl |
| 10541075 | Cxcl12        | NM_001012477 | 1.64336e-007 | -3.8559  | E11.5 * Sox10 down vs E11.5 * Ctrl |
| 10606369 | Itm2a         | NM_008409    | 1.36366e-006 | -3.87122 | E11.5 * Sox10 down vs E11.5 * Ctrl |
| 10530029 | Lgi2          | NM_144945    | 3.41906e-010 | -3.89495 | E11.5 * Sox10 down vs E11.5 * Ctrl |
| 10595211 | Col12a1       | NM_007730    | 4.38845e-009 | -3.89611 | E11.5 * Sox10 down vs E11.5 * Ctrl |
| 10546430 | Adamts9       | NM_175314    | 3.32209e-007 | -3.94599 | E11.5 * Sox10 down vs E11.5 * Ctrl |
| 10568436 | Fgfr2         | NM_010207    | 5.81455e-008 | -3.95297 | E11.5 * Sox10 down vs E11.5 * Ctrl |
| 10498952 | Gucy1a3       | NM_021896    | 4.39693e-010 | -3.95571 | E11.5 * Sox10 down vs E11.5 * Ctrl |
| 10578136 | ---           | ---          | 1.60941e-006 | -3.96114 | E11.5 * Sox10 down vs E11.5 * Ctrl |
| 10446965 | Rasgrp3       | NM_207246    | 4.63374e-009 | -3.97075 | E11.5 * Sox10 down vs E11.5 * Ctrl |
| 10559790 | Zim1          | NM_011769    | 1.16755e-008 | -3.97266 | E11.5 * Sox10 down vs E11.5 * Ctrl |
| 10546454 | Adamts9       | NM_175314    | 7.85159e-010 | -3.97283 | E11.5 * Sox10 down vs E11.5 * Ctrl |
| 10491732 | Fat4          | NM_183221    | 8.69322e-009 | -4.02844 | E11.5 * Sox10 down vs E11.5 * Ctrl |
| 10419261 | Bmp4          | NM_007554    | 3.43195e-010 | -4.06215 | E11.5 * Sox10 down vs E11.5 * Ctrl |
| 10513256 | Lpar1         | NM_010336    | 5.31202e-009 | -4.07764 | E11.5 * Sox10 down vs E11.5 * Ctrl |
| 10604175 | Fam70a        | NM_172930    | 4.44549e-008 | -4.08281 | E11.5 * Sox10 down vs E11.5 * Ctrl |
| 10467826 | LOC545291     | NM_001081257 | 4.92444e-009 | -4.09196 | E11.5 * Sox10 down vs E11.5 * Ctrl |
| 10396419 | ---           | ---          | 1.27105e-005 | -4.10006 | E11.5 * Sox10 down vs E11.5 * Ctrl |
| 10569344 | Igf2          | NM_001122737 | 2.92397e-007 | -4.10764 | E11.5 * Sox10 down vs E11.5 * Ctrl |
| 10537296 | ---           | ---          | 1.21846e-006 | -4.15988 | E11.5 * Sox10 down vs E11.5 * Ctrl |
| 10423520 | Sema5a        | NM_009154    | 6.55527e-010 | -4.20304 | E11.5 * Sox10 down vs E11.5 * Ctrl |
| 10542592 | ENSMUSG0000C  | AK143453     | 3.76844e-010 | -4.23348 | E11.5 * Sox10 down vs E11.5 * Ctrl |
| 10427402 | Ghr           | NM_010284    | 4.3513e-010  | -4.26137 | E11.5 * Sox10 down vs E11.5 * Ctrl |
| 10397645 | Gpr65         | NM_008152    | 1.63863e-007 | -4.26456 | E11.5 * Sox10 down vs E11.5 * Ctrl |
| 10569341 | H19           | NR_001592    | 2.54662e-006 | -4.28589 | E11.5 * Sox10 down vs E11.5 * Ctrl |
| 10574438 | Cdh5          | NM_009868    | 2.13384e-007 | -4.2929  | E11.5 * Sox10 down vs E11.5 * Ctrl |
| 10514088 | Frem1         | NM_177863    | 2.90456e-011 | -4.29655 | E11.5 * Sox10 down vs E11.5 * Ctrl |

|          |               |              |              |          |                                    |
|----------|---------------|--------------|--------------|----------|------------------------------------|
| 10433776 | Snai2         | NM_011415    | 2.76213e-009 | -4.35899 | E11.5 * Sox10 down vs E11.5 * Ctrl |
| 10531177 | Adamts3       | NM_001081401 | 6.0849e-010  | -4.37845 | E11.5 * Sox10 down vs E11.5 * Ctrl |
| 10546432 | Adamts9       | NM_175314    | 1.01492e-005 | -4.4344  | E11.5 * Sox10 down vs E11.5 * Ctrl |
| 10484197 | 2610301F02Rik | ENSMUST00000 | 5.82914e-010 | -4.45613 | E11.5 * Sox10 down vs E11.5 * Ctrl |
| 10484371 | Calcr1        | NM_018782    | 8.22082e-010 | -4.46082 | E11.5 * Sox10 down vs E11.5 * Ctrl |
| 10511363 | Penk          | NM_001002927 | 2.41885e-009 | -4.52269 | E11.5 * Sox10 down vs E11.5 * Ctrl |
| 10369615 | Srgn          | NM_011157    | 3.97657e-009 | -4.52623 | E11.5 * Sox10 down vs E11.5 * Ctrl |
| 10450484 | Aif1          | NM_019467    | 4.33283e-007 | -4.55402 | E11.5 * Sox10 down vs E11.5 * Ctrl |
| 10500559 | Hsd3b6        | NM_013821    | 1.16678e-008 | -4.57241 | E11.5 * Sox10 down vs E11.5 * Ctrl |
| 10490923 | Car2          | NM_009801    | 2.11969e-009 | -4.66295 | E11.5 * Sox10 down vs E11.5 * Ctrl |
| 10576049 | Foxf1a        | ENSMUST00000 | 2.42989e-007 | -4.66669 | E11.5 * Sox10 down vs E11.5 * Ctrl |
| 10356880 | St8sia4       | NM_009183    | 3.78296e-012 | -4.75889 | E11.5 * Sox10 down vs E11.5 * Ctrl |
| 10416437 | Lcp1          | NM_008879    | 6.3793e-010  | -4.76913 | E11.5 * Sox10 down vs E11.5 * Ctrl |
| 10499861 | S100a9        | NM_009114    | 2.48624e-008 | -4.7748  | E11.5 * Sox10 down vs E11.5 * Ctrl |
| 10404606 | Ly86          | NM_010745    | 1.69728e-008 | -4.78324 | E11.5 * Sox10 down vs E11.5 * Ctrl |
| 10502770 | Lphn2         | NM_001081298 | 2.22955e-007 | -4.81555 | E11.5 * Sox10 down vs E11.5 * Ctrl |
| 10563611 | Saa1          | NM_009117    | 1.08877e-006 | -4.84621 | E11.5 * Sox10 down vs E11.5 * Ctrl |
| 10422728 | Dab2          | NM_023118    | 4.13e-009    | -4.86284 | E11.5 * Sox10 down vs E11.5 * Ctrl |
| 10490775 | ENSMUSG0000C  | ENSMUST00000 | 1.58714e-007 | -4.89209 | E11.5 * Sox10 down vs E11.5 * Ctrl |
| 10548892 | Arhgdib       | NM_007486    | 8.35621e-007 | -4.90331 | E11.5 * Sox10 down vs E11.5 * Ctrl |
| 10435948 | Ccdc80        | NM_026439    | 9.23557e-010 | -4.91221 | E11.5 * Sox10 down vs E11.5 * Ctrl |
| 10578950 | ENSMUSG0000C  | ENSMUST00000 | 2.78769e-009 | -4.91252 | E11.5 * Sox10 down vs E11.5 * Ctrl |
| 10601519 | Klhl4         | NM_172781    | 2.28625e-008 | -4.92639 | E11.5 * Sox10 down vs E11.5 * Ctrl |
| 10368240 | Tcf21         | NM_011545    | 7.58982e-008 | -4.95967 | E11.5 * Sox10 down vs E11.5 * Ctrl |
| 10406254 | Eil2          | NM_138953    | 1.38806e-010 | -5.00331 | E11.5 * Sox10 down vs E11.5 * Ctrl |
| 10438445 | Klhl6         | NM_183390    | 1.71973e-011 | -5.02826 | E11.5 * Sox10 down vs E11.5 * Ctrl |
| 10500780 | Nr1h5         | NM_198658    | 8.92468e-010 | -5.04268 | E11.5 * Sox10 down vs E11.5 * Ctrl |
| 10592533 | ---           | ---          | 8.23046e-010 | -5.04681 | E11.5 * Sox10 down vs E11.5 * Ctrl |
| 10486041 | Meis2         | NM_001136072 | 2.52245e-008 | -5.0704  | E11.5 * Sox10 down vs E11.5 * Ctrl |
| 10571840 | Hpgd          | NM_008278    | 1.35888e-008 | -5.0748  | E11.5 * Sox10 down vs E11.5 * Ctrl |
| 10523451 | Anxa3         | NM_013470    | 1.88849e-008 | -5.08581 | E11.5 * Sox10 down vs E11.5 * Ctrl |
| 10551883 | Tyrbp         | NM_011662    | 1.5028e-009  | -5.09825 | E11.5 * Sox10 down vs E11.5 * Ctrl |
| 10566272 | Hbb-y         | NM_008221    | 0.000470412  | -5.15246 | E11.5 * Sox10 down vs E11.5 * Ctrl |
| 10365974 | Dcn           | NM_007833    | 2.32847e-006 | -5.15402 | E11.5 * Sox10 down vs E11.5 * Ctrl |
| 10365983 | Lum           | NM_008524    | 3.60167e-006 | -5.18261 | E11.5 * Sox10 down vs E11.5 * Ctrl |
| 10586865 | Aldh1a2       | NM_009022    | 5.3223e-008  | -5.24151 | E11.5 * Sox10 down vs E11.5 * Ctrl |
| 10473444 | Aplnr         | NM_011784    | 6.83215e-011 | -5.2821  | E11.5 * Sox10 down vs E11.5 * Ctrl |
| 10472958 | Hoxd10        | NM_013554    | 1.60178e-006 | -5.31234 | E11.5 * Sox10 down vs E11.5 * Ctrl |
| 10461614 | Ms4a6c        | NM_028595    | 3.60603e-010 | -5.36986 | E11.5 * Sox10 down vs E11.5 * Ctrl |
| 10523359 | Cxcl13        | NM_018866    | 2.35898e-009 | -5.44001 | E11.5 * Sox10 down vs E11.5 * Ctrl |
| 10531724 | Plac8         | NM_139198    | 3.89079e-006 | -5.44789 | E11.5 * Sox10 down vs E11.5 * Ctrl |
| 10428376 | Angpt1        | NM_009640    | 3.90701e-010 | -5.49232 | E11.5 * Sox10 down vs E11.5 * Ctrl |
| 10536635 | A430107O13Rik | NM_001081351 | 3.2466e-010  | -5.50308 | E11.5 * Sox10 down vs E11.5 * Ctrl |
| 10546450 | Adamts9       | NM_175314    | 1.19812e-008 | -5.53412 | E11.5 * Sox10 down vs E11.5 * Ctrl |
| 10451677 | ---           | ---          | 2.93729e-011 | -5.54445 | E11.5 * Sox10 down vs E11.5 * Ctrl |
| 10523756 | ---           | ---          | 2.93729e-011 | -5.54445 | E11.5 * Sox10 down vs E11.5 * Ctrl |
| 10537504 | ---           | ---          | 2.93729e-011 | -5.54445 | E11.5 * Sox10 down vs E11.5 * Ctrl |
| 10466800 | Pgm5          | NM_175013    | 1.53429e-007 | -5.5616  | E11.5 * Sox10 down vs E11.5 * Ctrl |
| 10385770 | Olfr1372-ps1  | BC055827     | 4.52315e-008 | -5.57908 | E11.5 * Sox10 down vs E11.5 * Ctrl |
| 10574415 | 1700047G07Rik | ENSMUST00000 | 6.04048e-007 | -5.64059 | E11.5 * Sox10 down vs E11.5 * Ctrl |
| 10601942 | Nrk           | NM_013724    | 1.12643e-007 | -5.64509 | E11.5 * Sox10 down vs E11.5 * Ctrl |
| 10542981 | Gmfg          | NM_022024    | 5.64485e-009 | -5.65262 | E11.5 * Sox10 down vs E11.5 * Ctrl |
| 10369023 | Fam162b       | BC147085     | 1.14648e-008 | -5.65496 | E11.5 * Sox10 down vs E11.5 * Ctrl |
| 10554129 | B130024G19Rik | BC070425     | 1.82831e-010 | -5.75347 | E11.5 * Sox10 down vs E11.5 * Ctrl |
| 10422760 | Fyb           | NM_011815    | 2.9494e-010  | -5.78396 | E11.5 * Sox10 down vs E11.5 * Ctrl |
| 10394534 | Osr1          | NM_011859    | 2.1962e-007  | -5.79921 | E11.5 * Sox10 down vs E11.5 * Ctrl |
| 10512757 | Hemgn         | NM_053149    | 1.55487e-011 | -5.85506 | E11.5 * Sox10 down vs E11.5 * Ctrl |
| 10351905 | Spna1         | NM_011465    | 5.99484e-013 | -6.10264 | E11.5 * Sox10 down vs E11.5 * Ctrl |
| 10439299 | Stfa3         | NM_025288    | 1.92964e-008 | -6.18149 | E11.5 * Sox10 down vs E11.5 * Ctrl |
| 10357488 | Cd55          | NM_010016    | 7.33204e-010 | -6.24881 | E11.5 * Sox10 down vs E11.5 * Ctrl |
| 10522503 | Pdgfra        | NM_011058    | 4.55738e-008 | -6.28812 | E11.5 * Sox10 down vs E11.5 * Ctrl |
| 10484283 | Pde1a         | NM_016744    | 9.33463e-011 | -6.30479 | E11.5 * Sox10 down vs E11.5 * Ctrl |
| 10461622 | Ms4a6b        | NM_027209    | 2.75174e-008 | -6.37151 | E11.5 * Sox10 down vs E11.5 * Ctrl |
| 10544383 | Kel           | NM_032540    | 8.64593e-015 | -6.5051  | E11.5 * Sox10 down vs E11.5 * Ctrl |
| 10570434 | Ifitm1        | NM_026820    | 1.9994e-009  | -6.5132  | E11.5 * Sox10 down vs E11.5 * Ctrl |
| 10547657 | C3ar1         | NM_009779    | 6.34865e-010 | -6.5211  | E11.5 * Sox10 down vs E11.5 * Ctrl |

|                        |               |              |          |                                    |
|------------------------|---------------|--------------|----------|------------------------------------|
| 10480090 Itga8         | NM_001001309  | 4.55309e-010 | -6.54842 | E11.5 * Sox10 down vs E11.5 * Ctrl |
| 10494271 Ctss          | NM_021281     | 2.29271e-009 | -6.75572 | E11.5 * Sox10 down vs E11.5 * Ctrl |
| 10587231 Bmp5          | NM_007555     | 1.20456e-008 | -6.78747 | E11.5 * Sox10 down vs E11.5 * Ctrl |
| 10496359 Emcn          | NM_016885     | 7.89718e-012 | -7.1768  | E11.5 * Sox10 down vs E11.5 * Ctrl |
| 10500796               | ---           | 1.03092e-009 | -7.49488 | E11.5 * Sox10 down vs E11.5 * Ctrl |
| 10347931 C130026I21Rik | BC007193      | 7.84939e-009 | -7.59822 | E11.5 * Sox10 down vs E11.5 * Ctrl |
| 10445192 Rhag          | NM_011269     | 9.62904e-012 | -7.7113  | E11.5 * Sox10 down vs E11.5 * Ctrl |
| 10469358 Mrc1          | NM_008625     | 3.02113e-011 | -7.80227 | E11.5 * Sox10 down vs E11.5 * Ctrl |
| 10600024 Gpr50         | NM_010340     | 2.72401e-009 | -8.29513 | E11.5 * Sox10 down vs E11.5 * Ctrl |
| 10423917               | ---           | 7.65092e-006 | -8.65404 | E11.5 * Sox10 down vs E11.5 * Ctrl |
| 10359504 Dnm3os        | NR_002870     | 2.77644e-008 | -8.70662 | E11.5 * Sox10 down vs E11.5 * Ctrl |
| 10574023 Mt2           | NM_008630     | 7.02559e-010 | -9.0011  | E11.5 * Sox10 down vs E11.5 * Ctrl |
| 10573054 Gypa          | NM_010369     | 1.28306e-010 | -9.29867 | E11.5 * Sox10 down vs E11.5 * Ctrl |
| 10375046 Hba-x         | NM_010405     | 3.01694e-007 | -10.6769 | E11.5 * Sox10 down vs E11.5 * Ctrl |
| 10566254 Hbb-b1        | NM_008220     | 2.29806e-007 | -11.6445 | E11.5 * Sox10 down vs E11.5 * Ctrl |
| 10566258 Hbb-b1        | ENSMUST000001 | 1.41703e-007 | -11.7301 | E11.5 * Sox10 down vs E11.5 * Ctrl |
| 10439292 BC100530      | NM_001082546  | 7.32318e-010 | -13.3566 | E11.5 * Sox10 down vs E11.5 * Ctrl |
| 10375051 Hba-a1        | NM_008218     | 1.42568e-007 | -13.6785 | E11.5 * Sox10 down vs E11.5 * Ctrl |
| 10375058 Hba-a2        | NM_001083955  | 8.48747e-008 | -13.9448 | E11.5 * Sox10 down vs E11.5 * Ctrl |
| 10566268 Hbb-bh1       | NM_008219     | 6.28451e-010 | -30.2574 | E11.5 * Sox10 down vs E11.5 * Ctrl |

## W11 vs S11

| Probeset ID | Gene Symbol   | RefSeq       | p-value      | Fold-change | Comparison                         |
|-------------|---------------|--------------|--------------|-------------|------------------------------------|
| 10406845    | Foxd1         | NM_008242    | 1.06825e-006 | 4.43936     | E11.5 * Wnt1 up vs E11.5 * Sox10   |
| 10359624    | Prrx1         | NM_175686    | 7.85618e-006 | 2.41211     | E11.5 * Wnt1 up vs E11.5 * Sox10   |
| 10374777    | Efemp1        | NM_146015    | 1.68387e-005 | 1.97954     | E11.5 * Wnt1 up vs E11.5 * Sox10   |
| 10604961    | Gabra3        | NM_008067    | 1.19612e-005 | 1.62065     | E11.5 * Wnt1 up vs E11.5 * Sox10   |
| 10483081    | Fap           | NM_007986    | 6.11863e-005 | 1.56946     | E11.5 * Wnt1 up vs E11.5 * Sox10   |
| 10418300    | Cacna2d3      | NM_009785    | 4.75558e-005 | 1.5382      | E11.5 * Wnt1 up vs E11.5 * Sox10   |
| 10542369    | EG668137      | NM_001142734 | 8.79081e-005 | 1.52643     | E11.5 * Wnt1 up vs E11.5 * Sox10   |
| 10427796    | Npr3          | NM_008728    | 3.01705e-005 | 1.43848     | E11.5 * Wnt1 up vs E11.5 * Sox10   |
| 10535017    | Gal3st4       | NM_001033416 | 4.50238e-005 | 1.40859     | E11.5 * Wnt1 up vs E11.5 * Sox10   |
| 10410766    | Nr2f1         | NM_010151    | 2.884e-006   | 1.39689     | E11.5 * Wnt1 up vs E11.5 * Sox10   |
| 10440258    | Epha3         | NM_010140    | 6.42963e-006 | 1.34751     | E11.5 * Wnt1 up vs E11.5 * Sox10   |
| 10395129    | Tmem18        | NM_172049    | 4.02787e-005 | 1.33119     | E11.5 * Wnt1 up vs E11.5 * Sox10   |
| 10414025    | Gdf10         | NM_145741    | 0.00012492   | 1.24395     | E11.5 * Wnt1 up vs E11.5 * Sox10   |
| 10520234    | 2010209O12Rik | NM_133913    | 6.2418e-005  | 1.23603     | E11.5 * Wnt1 up vs E11.5 * Sox10   |
| 10513869    | Megf9         | NM_172694    | 8.79596e-005 | 1.23126     | E11.5 * Wnt1 up vs E11.5 * Sox10   |
| 10504424    | Reck          | NM_016678    | 8.62674e-005 | 1.22364     | E11.5 * Wnt1 up vs E11.5 * Sox10   |
| 10578262    |               | ---          | 3.19624e-005 | 1.21652     | E11.5 * Wnt1 up vs E11.5 * Sox10   |
| 10437330    | Crebbp        | ENSMUST00000 | 1.6752e-005  | 1.18246     | E11.5 * Wnt1 up vs E11.5 * Sox10   |
| 10581910    | Tmem170       | NM_025781    | 6.52998e-005 | 1.17136     | E11.5 * Wnt1 up vs E11.5 * Sox10   |
| 10367393    | Wibg          | NM_030100    | 4.186e-005   | 1.15889     | E11.5 * Wnt1 up vs E11.5 * Sox10   |
| 10465649    | Mark2         | NM_007928    | 8.24369e-005 | 1.11486     | E11.5 * Wnt1 up vs E11.5 * Sox10   |
| 10550052    | Rps5          | NM_009095    | 4.9987e-005  | -1.06324    | E11.5 * Wnt1 down vs E11.5 * Sox10 |
| 10408684    | Tmed10        | NM_026775    | 7.36797e-005 | -1.10395    | E11.5 * Wnt1 down vs E11.5 * Sox10 |
| 10366004    | Atp2b1        | NM_026482    | 4.17805e-005 | -1.14076    | E11.5 * Wnt1 down vs E11.5 * Sox10 |
| 10437392    | Magmas        | NM_025571    | 0.000124983  | -1.14544    | E11.5 * Wnt1 down vs E11.5 * Sox10 |
| 10395739    | Srp54b        | NM_001100109 | 1.40352e-005 | -1.17538    | E11.5 * Wnt1 down vs E11.5 * Sox10 |
| 10395788    | Srp54c        | NM_001100110 | 2.27304e-005 | -1.19605    | E11.5 * Wnt1 down vs E11.5 * Sox10 |
| 10368670    | Amd1          | NM_009665    | 5.9218e-005  | -1.1964     | E11.5 * Wnt1 down vs E11.5 * Sox10 |
| 10405693    | Dapk1         | NM_029653    | 2.05131e-006 | -1.19662    | E11.5 * Wnt1 down vs E11.5 * Sox10 |
| 10375234    | Nudcd2        | NM_026023    | 0.00010129   | -1.19821    | E11.5 * Wnt1 down vs E11.5 * Sox10 |
| 10357133    |               | ---          | 0.000103372  | -1.21712    | E11.5 * Wnt1 down vs E11.5 * Sox10 |
| 10375893    | Sar1b         | NM_025535    | 7.22255e-005 | -1.26228    | E11.5 * Wnt1 down vs E11.5 * Sox10 |
| 10542397    | H2afj         | NM_177688    | 1.34479e-005 | -1.26291    | E11.5 * Wnt1 down vs E11.5 * Sox10 |
| 10599627    | Hprt1         | NM_013556    | 2.45264e-005 | -1.30728    | E11.5 * Wnt1 down vs E11.5 * Sox10 |
| 10578904    | Cpe           | NM_013494    | 3.77055e-005 | -1.30998    | E11.5 * Wnt1 down vs E11.5 * Sox10 |
| 10597354    | Pdcd6ip       | NM_011052    | 6.97532e-005 | -1.31462    | E11.5 * Wnt1 down vs E11.5 * Sox10 |
| 10607143    | Capn6         | NM_007603    | 0.000118499  | -1.31477    | E11.5 * Wnt1 down vs E11.5 * Sox10 |
| 10426016    | Gtse1         | NM_013882    | 7.86591e-005 | -1.3342     | E11.5 * Wnt1 down vs E11.5 * Sox10 |
| 10355984    | Serpine2      | NM_009255    | 1.82956e-006 | -1.35654    | E11.5 * Wnt1 down vs E11.5 * Sox10 |
| 10449644    | Glo1          | NM_025374    | 9.99336e-005 | -1.36214    | E11.5 * Wnt1 down vs E11.5 * Sox10 |
| 10394812    |               | ---          | 1.03421e-005 | -1.40148    | E11.5 * Wnt1 down vs E11.5 * Sox10 |
| 10415332    | Rec8          | NM_020002    | 3.33932e-005 | -1.40241    | E11.5 * Wnt1 down vs E11.5 * Sox10 |

|          |               |               |              |          |                                    |
|----------|---------------|---------------|--------------|----------|------------------------------------|
| 10565852 | Rnf169        | AK173319      | 1.64563e-005 | -1.42764 | E11.5 * Wnt1 down vs E11.5 * Sox10 |
| 10424105 | Colec10       | NM_173422     | 0.000127562  | -1.43824 | E11.5 * Wnt1 down vs E11.5 * Sox10 |
| 10487011 | Gatm          | NM_025961     | 4.81421e-005 | -1.46524 | E11.5 * Wnt1 down vs E11.5 * Sox10 |
| 10411306 | Polk          | NM_012048     | 2.00172e-007 | -1.47532 | E11.5 * Wnt1 down vs E11.5 * Sox10 |
| 10531869 | Mapk10        | NM_009158     | 0.000122534  | -1.5139  | E11.5 * Wnt1 down vs E11.5 * Sox10 |
| 10369783 | Zfp365        | NM_178679     | 6.4553e-006  | -1.52625 | E11.5 * Wnt1 down vs E11.5 * Sox10 |
| 10384145 | H2afv         | BC028539      | 3.79458e-005 | -1.55598 | E11.5 * Wnt1 down vs E11.5 * Sox10 |
| 10596637 | Mapkapk3      | NM_178907     | 5.59909e-005 | -1.56538 | E11.5 * Wnt1 down vs E11.5 * Sox10 |
| 10469457 | Plxdc2        | NM_026162     | 1.33091e-007 | -1.58333 | E11.5 * Wnt1 down vs E11.5 * Sox10 |
| 10359480 | Dnm3          | NM_001038619  | 1.66468e-005 | -1.6252  | E11.5 * Wnt1 down vs E11.5 * Sox10 |
| 10492640 | Fstl5         | NM_178673     | 5.86455e-005 | -1.66399 | E11.5 * Wnt1 down vs E11.5 * Sox10 |
| 10519886 | Sema3c        | NM_013657     | 4.61139e-008 | -1.6679  | E11.5 * Wnt1 down vs E11.5 * Sox10 |
| 10495316 | Pscl1         | NM_019976     | 9.18041e-006 | -1.69948 | E11.5 * Wnt1 down vs E11.5 * Sox10 |
| 10472893 | B230120H23Rik | NM_023057     | 4.23804e-006 | -1.73014 | E11.5 * Wnt1 down vs E11.5 * Sox10 |
| 10416437 | Lcp1          | NM_008879     | 0.000123417  | -1.74353 | E11.5 * Wnt1 down vs E11.5 * Sox10 |
| 10503259 | Trp53inp1     | NM_021897     | 1.65272e-007 | -1.7631  | E11.5 * Wnt1 down vs E11.5 * Sox10 |
| 10442327 | Cldn6         | NM_018777     | 2.6515e-005  | -1.76918 | E11.5 * Wnt1 down vs E11.5 * Sox10 |
| 10565570 | 4632434l11Rik | NM_001080995  | 6.58022e-006 | -1.79461 | E11.5 * Wnt1 down vs E11.5 * Sox10 |
| 10407126 | Plk2          | NM_152804     | 6.98428e-006 | -1.83079 | E11.5 * Wnt1 down vs E11.5 * Sox10 |
| 10481272 | 1700007K13Rik | BC099566      | 2.5565e-006  | -1.92606 | E11.5 * Wnt1 down vs E11.5 * Sox10 |
| 10416230 | Tnfrsf10b     | NM_020275     | 5.32439e-005 | -1.95445 | E11.5 * Wnt1 down vs E11.5 * Sox10 |
| 10551883 | Tyrbp         | NM_011662     | 4.94282e-005 | -1.97195 | E11.5 * Wnt1 down vs E11.5 * Sox10 |
| 10425257 | Polr2f        | NM_027231     | 1.83274e-005 | -2.05542 | E11.5 * Wnt1 down vs E11.5 * Sox10 |
| 10604175 | Fam70a        | NM_172930     | 4.45268e-005 | -2.16254 | E11.5 * Wnt1 down vs E11.5 * Sox10 |
| 10530100 | Arap2         | NM_178407     | 2.41693e-007 | -2.22792 | E11.5 * Wnt1 down vs E11.5 * Sox10 |
| 10467319 | Rbp4          | NM_001159487  | 5.78784e-006 | -2.38044 | E11.5 * Wnt1 down vs E11.5 * Sox10 |
| 10485745 | Ano3          | NM_001128103  | 2.93343e-005 | -2.5388  | E11.5 * Wnt1 down vs E11.5 * Sox10 |
| 10430447 | 1700088E04Rik | NM_138581     | 1.04669e-007 | -2.60484 | E11.5 * Wnt1 down vs E11.5 * Sox10 |
| 10605874 | Eda2r         | NM_175540     | 2.60763e-006 | -3.14677 | E11.5 * Wnt1 down vs E11.5 * Sox10 |
| 10425240 | Micall1       | NM_177461     | 1.31109e-010 | -3.3271  | E11.5 * Wnt1 down vs E11.5 * Sox10 |
| 10385271 | Ccng1         | NM_009831     | 6.50571e-012 | -3.48595 | E11.5 * Wnt1 down vs E11.5 * Sox10 |
| 10566268 | Hbb-bh1       | NM_008219     | 3.09622e-005 | -4.0251  | E11.5 * Wnt1 down vs E11.5 * Sox10 |
| 10375046 | Hba-x         | NM_010405     | 4.9479e-005  | -4.48505 | E11.5 * Wnt1 down vs E11.5 * Sox10 |
| 10566258 | Hbb-b1        | ENSMUST000001 | 3.66923e-005 | -4.52825 | E11.5 * Wnt1 down vs E11.5 * Sox10 |
| 10485718 | Ano3          | NM_001128103  | 8.2266e-009  | -4.84739 | E11.5 * Wnt1 down vs E11.5 * Sox10 |
| 10566254 | Hbb-b1        | NM_008220     | 2.46268e-005 | -5.09403 | E11.5 * Wnt1 down vs E11.5 * Sox10 |
| 10443463 | Cdkn1a        | NM_007669     | 2.8372e-011  | -6.17501 | E11.5 * Wnt1 down vs E11.5 * Sox10 |

## W15 vs S15

| Probeset ID | Gene Symbol | RefSeq       | p-value      | Fold-change | Comparison                       |
|-------------|-------------|--------------|--------------|-------------|----------------------------------|
| 10564163    | Snord116    | NR_002895    | 9.23217e-007 | 4.4914      | E15.5 * Wnt1 up vs E15.5 * Sox10 |
| 10564167    | Snord116    | NR_002895    | 9.23217e-007 | 4.4914      | E15.5 * Wnt1 up vs E15.5 * Sox10 |
| 10564171    | Snord116    | NR_002895    | 9.23217e-007 | 4.4914      | E15.5 * Wnt1 up vs E15.5 * Sox10 |
| 10564173    | Snord116    | NR_002895    | 9.23217e-007 | 4.4914      | E15.5 * Wnt1 up vs E15.5 * Sox10 |
| 10564175    | Snord116    | NR_002895    | 9.23217e-007 | 4.4914      | E15.5 * Wnt1 up vs E15.5 * Sox10 |
| 10564179    | Snord116    | NR_002895    | 9.23217e-007 | 4.4914      | E15.5 * Wnt1 up vs E15.5 * Sox10 |
| 10564181    | Snord116    | NR_002895    | 9.23217e-007 | 4.4914      | E15.5 * Wnt1 up vs E15.5 * Sox10 |
| 10564185    | Snord116    | NR_002895    | 9.23217e-007 | 4.4914      | E15.5 * Wnt1 up vs E15.5 * Sox10 |
| 10564187    | Snord116    | NR_002895    | 9.23217e-007 | 4.4914      | E15.5 * Wnt1 up vs E15.5 * Sox10 |
| 10564189    | Snord116    | NR_002895    | 9.23217e-007 | 4.4914      | E15.5 * Wnt1 up vs E15.5 * Sox10 |
| 10564191    | Snord116    | NR_002895    | 9.23217e-007 | 4.4914      | E15.5 * Wnt1 up vs E15.5 * Sox10 |
| 10564193    | Snord116    | NR_002895    | 9.23217e-007 | 4.4914      | E15.5 * Wnt1 up vs E15.5 * Sox10 |
| 10564195    | Snord116    | NR_002895    | 9.23217e-007 | 4.4914      | E15.5 * Wnt1 up vs E15.5 * Sox10 |
| 10564197    | Snord116    | NR_002895    | 9.23217e-007 | 4.4914      | E15.5 * Wnt1 up vs E15.5 * Sox10 |
| 10564199    | Snord116    | NR_002895    | 9.23217e-007 | 4.4914      | E15.5 * Wnt1 up vs E15.5 * Sox10 |
| 10564201    | Snord116    | AF241256     | 9.23217e-007 | 4.4914      | E15.5 * Wnt1 up vs E15.5 * Sox10 |
| 10564205    | Snord116    | AF241256     | 9.23217e-007 | 4.4914      | E15.5 * Wnt1 up vs E15.5 * Sox10 |
| 10564207    | Snord116    | AF241256     | 9.23217e-007 | 4.4914      | E15.5 * Wnt1 up vs E15.5 * Sox10 |
| 10564165    | Snord116    | AF241256     | 5.77436e-007 | 4.49031     | E15.5 * Wnt1 up vs E15.5 * Sox10 |
| 10472398    | Scn2a1      | NM_001099298 | 1.54135e-006 | 4.45106     | E15.5 * Wnt1 up vs E15.5 * Sox10 |
| 10564161    | Snord116    | NR_002895    | 7.40581e-007 | 4.44278     | E15.5 * Wnt1 up vs E15.5 * Sox10 |
| 10564177    | Snord116    | AF241256     | 8.1004e-007  | 4.4046      | E15.5 * Wnt1 up vs E15.5 * Sox10 |
| 10564169    | Snord116    | AF241256     | 4.68105e-007 | 4.37933     | E15.5 * Wnt1 up vs E15.5 * Sox10 |

|          |           |              |              |         |                                  |
|----------|-----------|--------------|--------------|---------|----------------------------------|
| 10564159 | Snord116  | AF241256     | 6.64353e-007 | 4.34272 | E15.5 * Wnt1 up vs E15.5 * Sox10 |
| 10564183 | Snord116  | AF241256     | 6.2471e-007  | 4.30258 | E15.5 * Wnt1 up vs E15.5 * Sox10 |
| 10421934 | Klhl1     | NM_053105    | 3.65971e-010 | 3.91372 | E15.5 * Wnt1 up vs E15.5 * Sox10 |
| 10472384 | Scn2a1    | NM_001099298 | 7.61648e-008 | 3.88985 | E15.5 * Wnt1 up vs E15.5 * Sox10 |
| 10428509 | Csmd3     | NM_001081391 | 0.000158309  | 3.78558 | E15.5 * Wnt1 up vs E15.5 * Sox10 |
| 10472400 | Scn2a1    | NM_001099298 | 8.34814e-005 | 3.74816 | E15.5 * Wnt1 up vs E15.5 * Sox10 |
| 10428515 | Csmd3     | NM_001081391 | 3.605e-007   | 3.72218 | E15.5 * Wnt1 up vs E15.5 * Sox10 |
| 10503416 | Calb1     | NM_009788    | 7.40222e-011 | 3.66818 | E15.5 * Wnt1 up vs E15.5 * Sox10 |
| 10564011 | Snord115  | AF357427     | 3.17709e-009 | 3.49577 | E15.5 * Wnt1 up vs E15.5 * Sox10 |
| 10472372 | Scn2a1    | NM_001099298 | 6.89819e-009 | 3.42322 | E15.5 * Wnt1 up vs E15.5 * Sox10 |
| 10563913 | ---       | ---          | 5.51642e-009 | 3.38529 | E15.5 * Wnt1 up vs E15.5 * Sox10 |
| 10563917 | ---       | ---          | 5.51642e-009 | 3.38529 | E15.5 * Wnt1 up vs E15.5 * Sox10 |
| 10563923 | 100040985 | XM_001475615 | 5.51642e-009 | 3.38529 | E15.5 * Wnt1 up vs E15.5 * Sox10 |
| 10563937 | Snord115  | AF357427     | 5.38857e-008 | 3.32803 | E15.5 * Wnt1 up vs E15.5 * Sox10 |
| 10563947 | Snord115  | AF357427     | 5.38857e-008 | 3.32803 | E15.5 * Wnt1 up vs E15.5 * Sox10 |
| 10563951 | Snord115  | AF357427     | 5.38857e-008 | 3.32803 | E15.5 * Wnt1 up vs E15.5 * Sox10 |
| 10563953 | Snord115  | AF357427     | 5.38857e-008 | 3.32803 | E15.5 * Wnt1 up vs E15.5 * Sox10 |
| 10563957 | Snord115  | AF357427     | 5.38857e-008 | 3.32803 | E15.5 * Wnt1 up vs E15.5 * Sox10 |
| 10563995 | Snord115  | AF357427     | 5.38857e-008 | 3.32803 | E15.5 * Wnt1 up vs E15.5 * Sox10 |
| 10563997 | Snord115  | AF357427     | 5.38857e-008 | 3.32803 | E15.5 * Wnt1 up vs E15.5 * Sox10 |
| 10563999 | Snord115  | AF357427     | 5.38857e-008 | 3.32803 | E15.5 * Wnt1 up vs E15.5 * Sox10 |
| 10564001 | Snord115  | AF357427     | 5.38857e-008 | 3.32803 | E15.5 * Wnt1 up vs E15.5 * Sox10 |
| 10564003 | Snord115  | AF357427     | 5.38857e-008 | 3.32803 | E15.5 * Wnt1 up vs E15.5 * Sox10 |
| 10564007 | Snord115  | AF357427     | 5.38857e-008 | 3.32803 | E15.5 * Wnt1 up vs E15.5 * Sox10 |
| 10564029 | Snord115  | AF357427     | 5.38857e-008 | 3.32803 | E15.5 * Wnt1 up vs E15.5 * Sox10 |
| 10564031 | Snord115  | AF357427     | 5.38857e-008 | 3.32803 | E15.5 * Wnt1 up vs E15.5 * Sox10 |
| 10564035 | ---       | ---          | 5.38857e-008 | 3.32803 | E15.5 * Wnt1 up vs E15.5 * Sox10 |
| 10564039 | ---       | ---          | 5.38857e-008 | 3.32803 | E15.5 * Wnt1 up vs E15.5 * Sox10 |
| 10564051 | ---       | ---          | 5.38857e-008 | 3.32803 | E15.5 * Wnt1 up vs E15.5 * Sox10 |
| 10564059 | ---       | ---          | 5.38857e-008 | 3.32803 | E15.5 * Wnt1 up vs E15.5 * Sox10 |
| 10564061 | ---       | ---          | 5.38857e-008 | 3.32803 | E15.5 * Wnt1 up vs E15.5 * Sox10 |
| 10564063 | ---       | ---          | 5.38857e-008 | 3.32803 | E15.5 * Wnt1 up vs E15.5 * Sox10 |
| 10564065 | 100040985 | XM_001475615 | 5.38857e-008 | 3.32803 | E15.5 * Wnt1 up vs E15.5 * Sox10 |
| 10564067 | ---       | ---          | 5.38857e-008 | 3.32803 | E15.5 * Wnt1 up vs E15.5 * Sox10 |
| 10564071 | ---       | ---          | 5.38857e-008 | 3.32803 | E15.5 * Wnt1 up vs E15.5 * Sox10 |
| 10564075 | ---       | ---          | 5.38857e-008 | 3.32803 | E15.5 * Wnt1 up vs E15.5 * Sox10 |
| 10564081 | ---       | ---          | 5.38857e-008 | 3.32803 | E15.5 * Wnt1 up vs E15.5 * Sox10 |
| 10564083 | ---       | ---          | 5.38857e-008 | 3.32803 | E15.5 * Wnt1 up vs E15.5 * Sox10 |
| 10564131 | ---       | ---          | 5.38857e-008 | 3.32803 | E15.5 * Wnt1 up vs E15.5 * Sox10 |
| 10564133 | ---       | ---          | 5.38857e-008 | 3.32803 | E15.5 * Wnt1 up vs E15.5 * Sox10 |
| 10564141 | ---       | ---          | 5.38857e-008 | 3.32803 | E15.5 * Wnt1 up vs E15.5 * Sox10 |
| 10564145 | ---       | ---          | 5.38857e-008 | 3.32803 | E15.5 * Wnt1 up vs E15.5 * Sox10 |
| 10564149 | ---       | ---          | 5.38857e-008 | 3.32803 | E15.5 * Wnt1 up vs E15.5 * Sox10 |
| 10564151 | ---       | ---          | 5.38857e-008 | 3.32803 | E15.5 * Wnt1 up vs E15.5 * Sox10 |
| 10564153 | ---       | ---          | 5.38857e-008 | 3.32803 | E15.5 * Wnt1 up vs E15.5 * Sox10 |
| 10564155 | ---       | ---          | 5.38857e-008 | 3.32803 | E15.5 * Wnt1 up vs E15.5 * Sox10 |
| 10564041 | ---       | ---          | 2.53768e-008 | 3.30017 | E15.5 * Wnt1 up vs E15.5 * Sox10 |
| 10423287 | Cdh18     | NM_001081299 | 4.53399e-005 | 3.20925 | E15.5 * Wnt1 up vs E15.5 * Sox10 |
| 10472380 | Scn2a1    | NM_001099298 | 2.85687e-006 | 3.17621 | E15.5 * Wnt1 up vs E15.5 * Sox10 |
| 10501468 | Ntng1     | NM_030699    | 4.87323e-009 | 3.16544 | E15.5 * Wnt1 up vs E15.5 * Sox10 |
| 10472378 | Scn2a1    | NM_001099298 | 7.4977e-005  | 3.08737 | E15.5 * Wnt1 up vs E15.5 * Sox10 |
| 10472386 | Scn2a1    | NM_001099298 | 1.319e-007   | 3.0851  | E15.5 * Wnt1 up vs E15.5 * Sox10 |
| 10472402 | Scn2a1    | NM_001099298 | 2.48838e-008 | 3.07615 | E15.5 * Wnt1 up vs E15.5 * Sox10 |
| 10398360 | ---       | ---          | 2.69563e-006 | 3.05786 | E15.5 * Wnt1 up vs E15.5 * Sox10 |
| 10483324 | Scn9a     | NM_018852    | 1.05091e-007 | 2.99374 | E15.5 * Wnt1 up vs E15.5 * Sox10 |
| 10536363 | Tac1      | NM_009311    | 1.53902e-005 | 2.97131 | E15.5 * Wnt1 up vs E15.5 * Sox10 |
| 10358928 | Cacna1e   | NM_009782    | 3.27347e-010 | 2.94801 | E15.5 * Wnt1 up vs E15.5 * Sox10 |
| 10563935 | ---       | ---          | 2.13245e-008 | 2.89901 | E15.5 * Wnt1 up vs E15.5 * Sox10 |
| 10564045 | ---       | ---          | 2.13245e-008 | 2.89901 | E15.5 * Wnt1 up vs E15.5 * Sox10 |
| 10564047 | ---       | ---          | 2.13245e-008 | 2.89901 | E15.5 * Wnt1 up vs E15.5 * Sox10 |
| 10483326 | Scn9a     | NM_018852    | 4.83817e-008 | 2.8611  | E15.5 * Wnt1 up vs E15.5 * Sox10 |
| 10366457 | Ptpr      | NM_011217    | 2.67422e-009 | 2.85487 | E15.5 * Wnt1 up vs E15.5 * Sox10 |
| 10563993 | ---       | ---          | 6.95379e-009 | 2.81469 | E15.5 * Wnt1 up vs E15.5 * Sox10 |
| 10564021 | ---       | ---          | 6.95379e-009 | 2.81469 | E15.5 * Wnt1 up vs E15.5 * Sox10 |
| 10564025 | ---       | ---          | 6.95379e-009 | 2.81469 | E15.5 * Wnt1 up vs E15.5 * Sox10 |
| 10601569 | Pcdh11x   | NM_001081385 | 8.84672e-005 | 2.81431 | E15.5 * Wnt1 up vs E15.5 * Sox10 |

|          |               |              |              |         |                                  |
|----------|---------------|--------------|--------------|---------|----------------------------------|
| 10453518 | Nrxn1         | NM_020252    | 7.76111e-008 | 2.80793 | E15.5 * Wnt1 up vs E15.5 * Sox10 |
| 10350506 | Fam5c         | NM_153539    | 2.91859e-009 | 2.80506 | E15.5 * Wnt1 up vs E15.5 * Sox10 |
| 10563965 | ---           | ---          | 7.37823e-010 | 2.79847 | E15.5 * Wnt1 up vs E15.5 * Sox10 |
| 10563967 | ---           | ---          | 7.37823e-010 | 2.79847 | E15.5 * Wnt1 up vs E15.5 * Sox10 |
| 10563971 | ---           | ---          | 7.37823e-010 | 2.79847 | E15.5 * Wnt1 up vs E15.5 * Sox10 |
| 10564043 | ---           | ---          | 7.37823e-010 | 2.79847 | E15.5 * Wnt1 up vs E15.5 * Sox10 |
| 10418092 | A830039N20Rik | BC038501     | 2.76967e-006 | 2.78973 | E15.5 * Wnt1 up vs E15.5 * Sox10 |
| 10492174 | Tm4sf4        | NM_145539    | 4.72393e-006 | 2.78416 | E15.5 * Wnt1 up vs E15.5 * Sox10 |
| 10564089 | ---           | ---          | 2.19883e-007 | 2.76268 | E15.5 * Wnt1 up vs E15.5 * Sox10 |
| 10592420 | AW551984      | NM_178737    | 1.61609e-010 | 2.7488  | E15.5 * Wnt1 up vs E15.5 * Sox10 |
| 10418921 | Sncg          | NM_011430    | 3.5025e-008  | 2.74419 | E15.5 * Wnt1 up vs E15.5 * Sox10 |
| 10564135 | ---           | ---          | 4.15653e-010 | 2.73965 | E15.5 * Wnt1 up vs E15.5 * Sox10 |
| 10564027 | ---           | ---          | 4.19105e-007 | 2.73125 | E15.5 * Wnt1 up vs E15.5 * Sox10 |
| 10564077 | ---           | ---          | 4.19105e-007 | 2.73125 | E15.5 * Wnt1 up vs E15.5 * Sox10 |
| 10564079 | ---           | ---          | 4.19105e-007 | 2.73125 | E15.5 * Wnt1 up vs E15.5 * Sox10 |
| 10564085 | ---           | ---          | 4.19105e-007 | 2.73125 | E15.5 * Wnt1 up vs E15.5 * Sox10 |
| 10564087 | ---           | ---          | 4.19105e-007 | 2.73125 | E15.5 * Wnt1 up vs E15.5 * Sox10 |
| 10564091 | ---           | ---          | 4.19105e-007 | 2.73125 | E15.5 * Wnt1 up vs E15.5 * Sox10 |
| 10564093 | ---           | ---          | 4.19105e-007 | 2.73125 | E15.5 * Wnt1 up vs E15.5 * Sox10 |
| 10564095 | ---           | ---          | 4.19105e-007 | 2.73125 | E15.5 * Wnt1 up vs E15.5 * Sox10 |
| 10564097 | ---           | ---          | 4.19105e-007 | 2.73125 | E15.5 * Wnt1 up vs E15.5 * Sox10 |
| 10564099 | ---           | ---          | 4.19105e-007 | 2.73125 | E15.5 * Wnt1 up vs E15.5 * Sox10 |
| 10564101 | ---           | ---          | 4.19105e-007 | 2.73125 | E15.5 * Wnt1 up vs E15.5 * Sox10 |
| 10564103 | ---           | ---          | 4.19105e-007 | 2.73125 | E15.5 * Wnt1 up vs E15.5 * Sox10 |
| 10564105 | ---           | ---          | 4.19105e-007 | 2.73125 | E15.5 * Wnt1 up vs E15.5 * Sox10 |
| 10564107 | ---           | ---          | 4.19105e-007 | 2.73125 | E15.5 * Wnt1 up vs E15.5 * Sox10 |
| 10564113 | ---           | ---          | 4.19105e-007 | 2.73125 | E15.5 * Wnt1 up vs E15.5 * Sox10 |
| 10564115 | ---           | ---          | 4.19105e-007 | 2.73125 | E15.5 * Wnt1 up vs E15.5 * Sox10 |
| 10564119 | ---           | ---          | 4.19105e-007 | 2.73125 | E15.5 * Wnt1 up vs E15.5 * Sox10 |
| 10564121 | ---           | ---          | 4.19105e-007 | 2.73125 | E15.5 * Wnt1 up vs E15.5 * Sox10 |
| 10564123 | ---           | ---          | 4.19105e-007 | 2.73125 | E15.5 * Wnt1 up vs E15.5 * Sox10 |
| 10564125 | ---           | ---          | 4.19105e-007 | 2.73125 | E15.5 * Wnt1 up vs E15.5 * Sox10 |
| 10564127 | ---           | ---          | 4.19105e-007 | 2.73125 | E15.5 * Wnt1 up vs E15.5 * Sox10 |
| 10564129 | ---           | ---          | 4.19105e-007 | 2.73125 | E15.5 * Wnt1 up vs E15.5 * Sox10 |
| 10564139 | ---           | ---          | 4.19105e-007 | 2.73125 | E15.5 * Wnt1 up vs E15.5 * Sox10 |
| 10357300 | Dpp10         | NM_199021    | 1.73674e-013 | 2.72977 | E15.5 * Wnt1 up vs E15.5 * Sox10 |
| 10472396 | Scn2a1        | NM_001099298 | 8.2527e-007  | 2.72495 | E15.5 * Wnt1 up vs E15.5 * Sox10 |
| 10564143 | ---           | ---          | 7.50468e-010 | 2.71734 | E15.5 * Wnt1 up vs E15.5 * Sox10 |
| 10564147 | ---           | ---          | 7.50468e-010 | 2.71734 | E15.5 * Wnt1 up vs E15.5 * Sox10 |
| 10564013 | Snord115      | AF357427     | 8.67839e-009 | 2.71053 | E15.5 * Wnt1 up vs E15.5 * Sox10 |
| 10564017 | Snord115      | AF357427     | 8.67839e-009 | 2.71053 | E15.5 * Wnt1 up vs E15.5 * Sox10 |
| 10398366 | ---           | ---          | 0.000240372  | 2.69666 | E15.5 * Wnt1 up vs E15.5 * Sox10 |
| 10472364 | Scn2a1        | NM_001099298 | 2.55629e-005 | 2.68912 | E15.5 * Wnt1 up vs E15.5 * Sox10 |
| 10439362 | Stxbp5l       | NM_172440    | 1.76532e-008 | 2.68618 | E15.5 * Wnt1 up vs E15.5 * Sox10 |
| 10350951 | Tnr           | NM_022312    | 9.97919e-009 | 2.66436 | E15.5 * Wnt1 up vs E15.5 * Sox10 |
| 10564069 | ---           | ---          | 1.63403e-010 | 2.66267 | E15.5 * Wnt1 up vs E15.5 * Sox10 |
| 10564073 | ---           | ---          | 1.63403e-010 | 2.66267 | E15.5 * Wnt1 up vs E15.5 * Sox10 |
| 10584549 | Scn3b         | NM_178227    | 1.30305e-008 | 2.6577  | E15.5 * Wnt1 up vs E15.5 * Sox10 |
| 10564023 | ---           | ---          | 2.22742e-006 | 2.63599 | E15.5 * Wnt1 up vs E15.5 * Sox10 |
| 10511363 | Penk          | NM_001002927 | 6.97445e-007 | 2.61118 | E15.5 * Wnt1 up vs E15.5 * Sox10 |
| 10366144 | Mgat4c        | NM_026243    | 6.5403e-008  | 2.60395 | E15.5 * Wnt1 up vs E15.5 * Sox10 |
| 10564019 | ---           | ---          | 6.83622e-008 | 2.58731 | E15.5 * Wnt1 up vs E15.5 * Sox10 |
| 10398380 | ---           | ---          | 0.000122699  | 2.57579 | E15.5 * Wnt1 up vs E15.5 * Sox10 |
| 10374356 | Vstm2a        | NM_145967    | 5.65796e-007 | 2.57318 | E15.5 * Wnt1 up vs E15.5 * Sox10 |
| 10436636 | Ncam2         | NM_001113208 | 1.04383e-006 | 2.55894 | E15.5 * Wnt1 up vs E15.5 * Sox10 |
| 10355836 | Resp18        | NM_009049    | 6.3801e-008  | 2.54835 | E15.5 * Wnt1 up vs E15.5 * Sox10 |
| 10402604 | ---           | ---          | 4.04657e-007 | 2.54196 | E15.5 * Wnt1 up vs E15.5 * Sox10 |
| 10564033 | ---           | ---          | 2.63014e-006 | 2.53941 | E15.5 * Wnt1 up vs E15.5 * Sox10 |
| 10423274 | Cdh18         | NM_001081299 | 3.00699e-006 | 2.53435 | E15.5 * Wnt1 up vs E15.5 * Sox10 |
| 10418835 | Slc18a3       | NM_021712    | 4.24983e-006 | 2.53029 | E15.5 * Wnt1 up vs E15.5 * Sox10 |
| 10440465 | ---           | ---          | 0.000812515  | 2.52201 | E15.5 * Wnt1 up vs E15.5 * Sox10 |
| 10548043 | Kcna5         | NM_145983    | 3.19264e-006 | 2.51117 | E15.5 * Wnt1 up vs E15.5 * Sox10 |
| 10599187 | Zcchc12       | NM_028325    | 3.75385e-008 | 2.50075 | E15.5 * Wnt1 up vs E15.5 * Sox10 |
| 10355960 | Scg2          | NM_009129    | 3.06645e-006 | 2.45794 | E15.5 * Wnt1 up vs E15.5 * Sox10 |
| 10472374 | Scn9a         | BC172147     | 1.79538e-005 | 2.4546  | E15.5 * Wnt1 up vs E15.5 * Sox10 |
| 10444135 | AA388235      | NM_001013793 | 7.72618e-005 | 2.42593 | E15.5 * Wnt1 up vs E15.5 * Sox10 |

|                        |              |              |         |                                  |
|------------------------|--------------|--------------|---------|----------------------------------|
| 10564005               | ---          | 2.15425e-005 | 2.41385 | E15.5 * Wnt1 up vs E15.5 * Sox10 |
| 10456353 Grp           | NM_175012    | 1.31814e-006 | 2.4095  | E15.5 * Wnt1 up vs E15.5 * Sox10 |
| 10512332 4930466F19Rik | ENSMUST00000 | 0.000242649  | 2.40631 | E15.5 * Wnt1 up vs E15.5 * Sox10 |
| 10512354 4930466F19Rik | ENSMUST00000 | 0.000242649  | 2.40631 | E15.5 * Wnt1 up vs E15.5 * Sox10 |
| 10428522 Csmd3         | NM_001081391 | 6.30128e-006 | 2.40529 | E15.5 * Wnt1 up vs E15.5 * Sox10 |
| 10519770 Pclo          | NM_011995    | 3.80751e-008 | 2.39399 | E15.5 * Wnt1 up vs E15.5 * Sox10 |
| 10501555 Amy1          | NM_007446    | 8.80045e-005 | 2.38856 | E15.5 * Wnt1 up vs E15.5 * Sox10 |
| 10553450 Nell1         | NM_001037906 | 3.99873e-007 | 2.37879 | E15.5 * Wnt1 up vs E15.5 * Sox10 |
| 10588283 Rab6b         | NM_173781    | 3.34612e-006 | 2.3608  | E15.5 * Wnt1 up vs E15.5 * Sox10 |
| 10360053 Pcp4l1        | NM_025557    | 2.02322e-006 | 2.3591  | E15.5 * Wnt1 up vs E15.5 * Sox10 |
| 10504123 4933409K07Rik | BC059060     | 5.31102e-006 | 2.35184 | E15.5 * Wnt1 up vs E15.5 * Sox10 |
| 10504125 4933409K07Rik | BC059060     | 5.31102e-006 | 2.35184 | E15.5 * Wnt1 up vs E15.5 * Sox10 |
| 10563931               | ---          | 2.70568e-006 | 2.33653 | E15.5 * Wnt1 up vs E15.5 * Sox10 |
| 10440621 Grikl         | NM_146072    | 4.57241e-008 | 2.32906 | E15.5 * Wnt1 up vs E15.5 * Sox10 |
| 10563955 100040985     | XM_001475615 | 1.25908e-005 | 2.32874 | E15.5 * Wnt1 up vs E15.5 * Sox10 |
| 10392484 Abca8b        | NM_013851    | 7.2824e-006  | 2.32343 | E15.5 * Wnt1 up vs E15.5 * Sox10 |
| 10344879 A830018L16Rik | NM_177173    | 6.11398e-009 | 2.32277 | E15.5 * Wnt1 up vs E15.5 * Sox10 |
| 10411274 Sv2c          | NM_029210    | 1.32688e-008 | 2.32065 | E15.5 * Wnt1 up vs E15.5 * Sox10 |
| 10451838 Slc5a7        | NM_022025    | 9.15558e-007 | 2.31385 | E15.5 * Wnt1 up vs E15.5 * Sox10 |
| 10436658 7120432105Rik | AK148667     | 0.000673447  | 2.30801 | E15.5 * Wnt1 up vs E15.5 * Sox10 |
| 10560919 Atp1a3        | NM_144921    | 7.21139e-006 | 2.29656 | E15.5 * Wnt1 up vs E15.5 * Sox10 |
| 10564137               | ---          | 3.12505e-006 | 2.29113 | E15.5 * Wnt1 up vs E15.5 * Sox10 |
| 10508614 Fabp3         | NM_010174    | 6.01221e-008 | 2.28276 | E15.5 * Wnt1 up vs E15.5 * Sox10 |
| 10408268 Scgn          | NM_145399    | 0.000411338  | 2.26944 | E15.5 * Wnt1 up vs E15.5 * Sox10 |
| 10483228 Scn3a         | NM_018732    | 1.90535e-007 | 2.26666 | E15.5 * Wnt1 up vs E15.5 * Sox10 |
| 10563858 Gabrg3        | NM_008074    | 8.93813e-007 | 2.26284 | E15.5 * Wnt1 up vs E15.5 * Sox10 |
| 10476594 Macrod2       | NM_001013802 | 0.00130385   | 2.25781 | E15.5 * Wnt1 up vs E15.5 * Sox10 |
| 10547641 Slc2a3        | NM_011401    | 2.62086e-008 | 2.25717 | E15.5 * Wnt1 up vs E15.5 * Sox10 |
| 10416090 Stmn4         | NM_019675    | 2.09606e-006 | 2.25058 | E15.5 * Wnt1 up vs E15.5 * Sox10 |
| 10599841 C230004F18Rik | ENSMUST00000 | 4.97162e-006 | 2.24761 | E15.5 * Wnt1 up vs E15.5 * Sox10 |
| 10472368 Scn2a1        | NM_001099298 | 1.15754e-005 | 2.24563 | E15.5 * Wnt1 up vs E15.5 * Sox10 |
| 10504121 4933409K07Rik | BC059060     | 4.46936e-006 | 2.23025 | E15.5 * Wnt1 up vs E15.5 * Sox10 |
| 10594048 Islr2         | NM_177193    | 2.3053e-007  | 2.2236  | E15.5 * Wnt1 up vs E15.5 * Sox10 |
| 10531304 Cdkl2         | NM_016912    | 9.10872e-009 | 2.21724 | E15.5 * Wnt1 up vs E15.5 * Sox10 |
| 10455080 Pcdhb9        | NM_053134    | 7.60111e-005 | 2.21259 | E15.5 * Wnt1 up vs E15.5 * Sox10 |
| 10440216 Epha6         | NM_007938    | 3.15793e-007 | 2.20618 | E15.5 * Wnt1 up vs E15.5 * Sox10 |
| 10366196 Ppfia2        | NM_177373    | 8.63521e-009 | 2.206   | E15.5 * Wnt1 up vs E15.5 * Sox10 |
| 10519693 Sema3d        | NM_028882    | 2.52813e-006 | 2.20357 | E15.5 * Wnt1 up vs E15.5 * Sox10 |
| 10504148 4933409K07Rik | BC059060     | 5.85751e-009 | 2.19848 | E15.5 * Wnt1 up vs E15.5 * Sox10 |
| 10457929 Rit2          | NM_009065    | 3.24695e-007 | 2.19231 | E15.5 * Wnt1 up vs E15.5 * Sox10 |
| 10504178 4933409K07Rik | BC059060     | 1.88352e-009 | 2.18318 | E15.5 * Wnt1 up vs E15.5 * Sox10 |
| 10355259 Myl1          | NM_021285    | 1.56282e-005 | 2.17242 | E15.5 * Wnt1 up vs E15.5 * Sox10 |
| 10453231 Slc8a1        | NM_011406    | 2.29704e-007 | 2.15798 | E15.5 * Wnt1 up vs E15.5 * Sox10 |
| 10492536               | ---          | 1.98177e-005 | 2.14453 | E15.5 * Wnt1 up vs E15.5 * Sox10 |
| 10555303 Pgm2l1        | NM_027629    | 2.02424e-006 | 2.14192 | E15.5 * Wnt1 up vs E15.5 * Sox10 |
| 10462113 Apba1         | NM_177034    | 1.35515e-007 | 2.14116 | E15.5 * Wnt1 up vs E15.5 * Sox10 |
| 10398358               | ---          | 0.000744843  | 2.13949 | E15.5 * Wnt1 up vs E15.5 * Sox10 |
| 10428517 Csmd3         | NM_001081391 | 8.22688e-008 | 2.13859 | E15.5 * Wnt1 up vs E15.5 * Sox10 |
| 10540233 Fam19a1       | NM_182808    | 3.49243e-007 | 2.13762 | E15.5 * Wnt1 up vs E15.5 * Sox10 |
| 10483215 Scn3a         | NM_018732    | 1.00982e-006 | 2.1321  | E15.5 * Wnt1 up vs E15.5 * Sox10 |
| 10455942 A730017C20Rik | NM_173759    | 1.14479e-006 | 2.12166 | E15.5 * Wnt1 up vs E15.5 * Sox10 |
| 10357472 Cxcr4         | NM_009911    | 2.5924e-006  | 2.11983 | E15.5 * Wnt1 up vs E15.5 * Sox10 |
| 10504169 4933409K07Rik | BC072647     | 9.35004e-009 | 2.11206 | E15.5 * Wnt1 up vs E15.5 * Sox10 |
| 10431625 Syt10         | NM_018803    | 2.11072e-006 | 2.1044  | E15.5 * Wnt1 up vs E15.5 * Sox10 |
| 10502881 St6galnac5    | NM_012028    | 1.62504e-008 | 2.10237 | E15.5 * Wnt1 up vs E15.5 * Sox10 |
| 10398364               | ---          | 0.000218872  | 2.08774 | E15.5 * Wnt1 up vs E15.5 * Sox10 |
| 10371502 Fabp3         | NM_010174    | 9.91278e-009 | 2.07861 | E15.5 * Wnt1 up vs E15.5 * Sox10 |
| 10472382 Scn2a1        | NM_001099298 | 5.57552e-006 | 2.07708 | E15.5 * Wnt1 up vs E15.5 * Sox10 |
| 10408359 Nrsn1         | NM_009513    | 2.8083e-006  | 2.07133 | E15.5 * Wnt1 up vs E15.5 * Sox10 |
| 10371321 Slc41a2       | NM_177388    | 1.92631e-006 | 2.06782 | E15.5 * Wnt1 up vs E15.5 * Sox10 |
| 10604175 Fam70a        | NM_172930    | 8.20765e-005 | 2.06565 | E15.5 * Wnt1 up vs E15.5 * Sox10 |
| 10418053 Kcnma1        | NM_010610    | 4.05524e-008 | 2.06406 | E15.5 * Wnt1 up vs E15.5 * Sox10 |
| 10359689 Atp1b1        | NM_009721    | 1.39407e-005 | 2.05976 | E15.5 * Wnt1 up vs E15.5 * Sox10 |
| 10537458 EG434008      | NM_001004182 | 1.50519e-005 | 2.05703 | E15.5 * Wnt1 up vs E15.5 * Sox10 |
| 10358999 Xpr1          | NM_011273    | 1.26413e-010 | 2.04577 | E15.5 * Wnt1 up vs E15.5 * Sox10 |
| 10512327 4933409K07Rik | BC072647     | 2.53431e-008 | 2.04318 | E15.5 * Wnt1 up vs E15.5 * Sox10 |

|          |               |               |              |         |                                  |
|----------|---------------|---------------|--------------|---------|----------------------------------|
| 10347188 | A830006F12Rik | NM_177164     | 2.69021e-006 | 2.04261 | E15.5 * Wnt1 up vs E15.5 * Sox10 |
| 10407481 | Pfklp         | NM_019703     | 1.7883e-007  | 2.04152 | E15.5 * Wnt1 up vs E15.5 * Sox10 |
| 10593245 | Htr3b         | NM_020274     | 3.64232e-006 | 2.03792 | E15.5 * Wnt1 up vs E15.5 * Sox10 |
| 10367582 | Vip           | NM_011702     | 7.83546e-006 | 2.03725 | E15.5 * Wnt1 up vs E15.5 * Sox10 |
| 10600604 | Dmd           | NM_007868     | 6.57316e-007 | 2.02995 | E15.5 * Wnt1 up vs E15.5 * Sox10 |
| 10399308 | Fkbp1b        | NM_016863     | 0.000134102  | 2.02923 | E15.5 * Wnt1 up vs E15.5 * Sox10 |
| 10437205 | Pcp4          | NM_008791     | 7.02869e-005 | 2.02829 | E15.5 * Wnt1 up vs E15.5 * Sox10 |
| 10411527 | Cartpt        | NM_013732     | 0.00065362   | 2.02662 | E15.5 * Wnt1 up vs E15.5 * Sox10 |
| 10474814 | Disp2         | NM_170593     | 3.65551e-006 | 2.02577 | E15.5 * Wnt1 up vs E15.5 * Sox10 |
| 10497051 | Negr1         | NM_001039094  | 4.31321e-006 | 2.02322 | E15.5 * Wnt1 up vs E15.5 * Sox10 |
| 10545086 | Snca          | NM_001042451  | 1.64927e-006 | 2.01821 | E15.5 * Wnt1 up vs E15.5 * Sox10 |
| 10376245 | Gria1         | NM_001113325  | 2.4343e-009  | 2.01647 | E15.5 * Wnt1 up vs E15.5 * Sox10 |
| 10460123 | 9330132A10Rik | BC098197      | 2.97383e-006 | 2.00727 | E15.5 * Wnt1 up vs E15.5 * Sox10 |
| 10349208 | Cntnap5a      | NM_001077425  | 5.73643e-007 | 2.00418 | E15.5 * Wnt1 up vs E15.5 * Sox10 |
| 10591123 | Fat3          | NM_001080814  | 0.000908619  | 2.0027  | E15.5 * Wnt1 up vs E15.5 * Sox10 |
| 10526559 | Ache          | NM_009599     | 3.54082e-005 | 2.00011 | E15.5 * Wnt1 up vs E15.5 * Sox10 |
| 10398368 | ---           | ---           | 4.09553e-007 | 1.99847 | E15.5 * Wnt1 up vs E15.5 * Sox10 |
| 10428513 | Csmd3         | NM_001081391  | 7.68513e-005 | 1.99575 | E15.5 * Wnt1 up vs E15.5 * Sox10 |
| 10406782 | Fam169a       | NM_001100458  | 5.85709e-005 | 1.99252 | E15.5 * Wnt1 up vs E15.5 * Sox10 |
| 10344935 | Kcnb2         | NM_001098528  | 5.96381e-006 | 1.985   | E15.5 * Wnt1 up vs E15.5 * Sox10 |
| 10506274 | Dnajc6        | NM_198412     | 5.7449e-009  | 1.98461 | E15.5 * Wnt1 up vs E15.5 * Sox10 |
| 10421932 | Pcdh9         | NM_001081377  | 1.48526e-005 | 1.98293 | E15.5 * Wnt1 up vs E15.5 * Sox10 |
| 10395702 | Akap6         | NM_198111     | 4.45002e-009 | 1.97636 | E15.5 * Wnt1 up vs E15.5 * Sox10 |
| 10397482 | Tmem63c       | NM_172583     | 1.24226e-007 | 1.97577 | E15.5 * Wnt1 up vs E15.5 * Sox10 |
| 10456237 | St8sia3       | NM_009182     | 3.53307e-006 | 1.97168 | E15.5 * Wnt1 up vs E15.5 * Sox10 |
| 10360349 | Cadm3         | NM_053199     | 3.01165e-007 | 1.96798 | E15.5 * Wnt1 up vs E15.5 * Sox10 |
| 10520318 | Dpp6          | NM_010075     | 3.12798e-010 | 1.96643 | E15.5 * Wnt1 up vs E15.5 * Sox10 |
| 10363786 | Ank3          | NM_146005     | 1.2405e-007  | 1.96523 | E15.5 * Wnt1 up vs E15.5 * Sox10 |
| 10474373 | Kcna4         | NM_021275     | 6.17083e-005 | 1.95222 | E15.5 * Wnt1 up vs E15.5 * Sox10 |
| 10563915 | ---           | ---           | 2.53034e-007 | 1.95204 | E15.5 * Wnt1 up vs E15.5 * Sox10 |
| 10563929 | ---           | ---           | 2.53034e-007 | 1.95204 | E15.5 * Wnt1 up vs E15.5 * Sox10 |
| 10572070 | Npy1r         | NM_010934     | 2.1252e-006  | 1.95032 | E15.5 * Wnt1 up vs E15.5 * Sox10 |
| 10607156 | Dcx           | NM_001110222  | 2.86913e-006 | 1.94588 | E15.5 * Wnt1 up vs E15.5 * Sox10 |
| 10537300 | 1700111E14Rik | ENSMUST000000 | 0.000395956  | 1.94284 | E15.5 * Wnt1 up vs E15.5 * Sox10 |
| 10546736 | Cntn3         | NM_008779     | 7.8439e-006  | 1.94265 | E15.5 * Wnt1 up vs E15.5 * Sox10 |
| 10363921 | Pcdh15        | NM_023115     | 3.30699e-006 | 1.93793 | E15.5 * Wnt1 up vs E15.5 * Sox10 |
| 10398378 | ---           | ---           | 0.00482684   | 1.93791 | E15.5 * Wnt1 up vs E15.5 * Sox10 |
| 10606554 | Nap1l3        | NM_138742     | 1.2567e-006  | 1.93592 | E15.5 * Wnt1 up vs E15.5 * Sox10 |
| 10472136 | Galnt13       | NM_173030     | 2.09618e-006 | 1.93192 | E15.5 * Wnt1 up vs E15.5 * Sox10 |
| 10395428 | Dgkb          | NM_178681     | 4.74515e-006 | 1.9311  | E15.5 * Wnt1 up vs E15.5 * Sox10 |
| 10530870 | Epha5         | NM_007937     | 7.01648e-007 | 1.9288  | E15.5 * Wnt1 up vs E15.5 * Sox10 |
| 10584561 | 9030425E11Rik | NM_133733     | 0.000606879  | 1.92721 | E15.5 * Wnt1 up vs E15.5 * Sox10 |
| 10607484 | Ptchd1        | NM_001093750  | 0.000845764  | 1.92189 | E15.5 * Wnt1 up vs E15.5 * Sox10 |
| 10472366 | Scn2a1        | NM_001099298  | 0.00022607   | 1.91843 | E15.5 * Wnt1 up vs E15.5 * Sox10 |
| 10585823 | LOC665268     | XM_001479935  | 0.000228257  | 1.91008 | E15.5 * Wnt1 up vs E15.5 * Sox10 |
| 10366163 | Slc6a15       | NM_175328     | 2.61979e-005 | 1.90741 | E15.5 * Wnt1 up vs E15.5 * Sox10 |
| 10360664 | ENSMUSG0000C  | ENSMUST000000 | 2.26689e-006 | 1.90651 | E15.5 * Wnt1 up vs E15.5 * Sox10 |
| 10504139 | 4933409K07Rik | BC059060      | 7.15181e-008 | 1.90566 | E15.5 * Wnt1 up vs E15.5 * Sox10 |
| 10428453 | Csmd3         | NM_001081391  | 4.94895e-009 | 1.90158 | E15.5 * Wnt1 up vs E15.5 * Sox10 |
| 10456363 | Gnal          | NM_010307     | 0.000124904  | 1.9006  | E15.5 * Wnt1 up vs E15.5 * Sox10 |
| 10493995 | S100a10       | NM_009112     | 5.16161e-005 | 1.90044 | E15.5 * Wnt1 up vs E15.5 * Sox10 |
| 10457942 | Syt4          | NM_009308     | 7.01997e-006 | 1.9003  | E15.5 * Wnt1 up vs E15.5 * Sox10 |
| 10504137 | 4933409K07Rik | BC072647      | 6.17227e-006 | 1.89871 | E15.5 * Wnt1 up vs E15.5 * Sox10 |
| 10504201 | 4933409K07Rik | BC072647      | 6.17227e-006 | 1.89871 | E15.5 * Wnt1 up vs E15.5 * Sox10 |
| 10512350 | 4933409K07Rik | BC072647      | 6.17227e-006 | 1.89871 | E15.5 * Wnt1 up vs E15.5 * Sox10 |
| 10512352 | 4933409K07Rik | BC072647      | 6.17227e-006 | 1.89871 | E15.5 * Wnt1 up vs E15.5 * Sox10 |
| 10438639 | Dgkg          | NM_138650     | 2.29957e-007 | 1.89624 | E15.5 * Wnt1 up vs E15.5 * Sox10 |
| 10529937 | Kcnp4         | NM_030265     | 1.62934e-006 | 1.89465 | E15.5 * Wnt1 up vs E15.5 * Sox10 |
| 10579550 | Unc13a        | BC058348      | 8.94204e-007 | 1.89345 | E15.5 * Wnt1 up vs E15.5 * Sox10 |
| 10398459 | Ppp2r5c       | NM_001135001  | 0.000189043  | 1.89091 | E15.5 * Wnt1 up vs E15.5 * Sox10 |
| 10563939 | ---           | ---           | 0.000695283  | 1.89066 | E15.5 * Wnt1 up vs E15.5 * Sox10 |
| 10494372 | Sv2a          | NM_022030     | 0.000233071  | 1.8898  | E15.5 * Wnt1 up vs E15.5 * Sox10 |
| 10492136 | Dclk1         | NM_019978     | 3.15616e-008 | 1.88877 | E15.5 * Wnt1 up vs E15.5 * Sox10 |
| 10369752 | Lrrtm3        | NM_178678     | 8.64473e-006 | 1.88633 | E15.5 * Wnt1 up vs E15.5 * Sox10 |
| 10529953 | ENSMUSG0000C  | AK036806      | 0.00491691   | 1.88589 | E15.5 * Wnt1 up vs E15.5 * Sox10 |
| 10475324 | Ckmt1         | NM_009897     | 0.000144645  | 1.88414 | E15.5 * Wnt1 up vs E15.5 * Sox10 |

|                        |               |              |         |                                  |
|------------------------|---------------|--------------|---------|----------------------------------|
| 10406823               | ---           | 7.75089e-005 | 1.88384 | E15.5 * Wnt1 up vs E15.5 * Sox10 |
| 10583163 Trpc6         | NM_013838     | 1.16499e-007 | 1.87901 | E15.5 * Wnt1 up vs E15.5 * Sox10 |
| 10504172 4933409K07Rik | BC059060      | 4.76301e-008 | 1.87701 | E15.5 * Wnt1 up vs E15.5 * Sox10 |
| 10400302               | ---           | 0.0036074    | 1.87648 | E15.5 * Wnt1 up vs E15.5 * Sox10 |
| 10605113 L1cam         | NM_008478     | 5.45543e-007 | 1.87255 | E15.5 * Wnt1 up vs E15.5 * Sox10 |
| 10572024 Spock3        | NM_023689     | 8.417e-006   | 1.87189 | E15.5 * Wnt1 up vs E15.5 * Sox10 |
| 10483131 Kcnh7         | NM_133207     | 5.54808e-007 | 1.87096 | E15.5 * Wnt1 up vs E15.5 * Sox10 |
| 10569278 5530400B01Rik | ENSMUST000001 | 0.000115672  | 1.87074 | E15.5 * Wnt1 up vs E15.5 * Sox10 |
| 10385283 Gabrg2        | NM_008073     | 1.79434e-005 | 1.87041 | E15.5 * Wnt1 up vs E15.5 * Sox10 |
| 10532630 Adrbk2        | NM_177078     | 5.72154e-005 | 1.8673  | E15.5 * Wnt1 up vs E15.5 * Sox10 |
| 10449920 Zfp811        | NM_183177     | 2.11049e-005 | 1.86547 | E15.5 * Wnt1 up vs E15.5 * Sox10 |
| 10398354               | ---           | 0.00237238   | 1.86155 | E15.5 * Wnt1 up vs E15.5 * Sox10 |
| 10485580 Cstf3         | NM_145529     | 7.32685e-005 | 1.86068 | E15.5 * Wnt1 up vs E15.5 * Sox10 |
| 10463737 Ina           | AK144917      | 0.000149102  | 1.85899 | E15.5 * Wnt1 up vs E15.5 * Sox10 |
| 10502451 Bmpr1b        | NM_007560     | 1.33718e-005 | 1.85843 | E15.5 * Wnt1 up vs E15.5 * Sox10 |
| 10564667 Ntrk3         | NM_008746     | 4.40731e-005 | 1.85459 | E15.5 * Wnt1 up vs E15.5 * Sox10 |
| 10602198 Pak3          | NM_008778     | 2.47306e-006 | 1.85217 | E15.5 * Wnt1 up vs E15.5 * Sox10 |
| 10356154 Sphkap        | NM_172430     | 7.3521e-005  | 1.8517  | E15.5 * Wnt1 up vs E15.5 * Sox10 |
| 10347734 Sgpp2         | NM_001004173  | 5.8484e-008  | 1.85007 | E15.5 * Wnt1 up vs E15.5 * Sox10 |
| 10485309 E530001K10Rik | ENSMUST000001 | 0.00109321   | 1.84496 | E15.5 * Wnt1 up vs E15.5 * Sox10 |
| 10366229 Lin7a         | NM_001039354  | 4.35451e-006 | 1.84338 | E15.5 * Wnt1 up vs E15.5 * Sox10 |
| 10372342 Nav3          | NM_001081035  | 7.04252e-008 | 1.84306 | E15.5 * Wnt1 up vs E15.5 * Sox10 |
| 10354003 Mgat4a        | NM_173870     | 0.000494421  | 1.83911 | E15.5 * Wnt1 up vs E15.5 * Sox10 |
| 10492720 Mtap9         | NM_001081230  | 6.75334e-005 | 1.83779 | E15.5 * Wnt1 up vs E15.5 * Sox10 |
| 10606789 Tceal6        | NM_025355     | 0.00100748   | 1.83742 | E15.5 * Wnt1 up vs E15.5 * Sox10 |
| 10573172 Clgn          | NM_009904     | 2.24489e-006 | 1.83523 | E15.5 * Wnt1 up vs E15.5 * Sox10 |
| 10492628 Serpini1      | NM_009250     | 1.34402e-005 | 1.83475 | E15.5 * Wnt1 up vs E15.5 * Sox10 |
| 10353729 4930444G20Rik | NM_053264     | 0.000921183  | 1.83391 | E15.5 * Wnt1 up vs E15.5 * Sox10 |
| 10395971               | ---           | 0.000547667  | 1.83294 | E15.5 * Wnt1 up vs E15.5 * Sox10 |
| 10556067 Syt9          | NM_021889     | 4.13947e-007 | 1.8324  | E15.5 * Wnt1 up vs E15.5 * Sox10 |
| 10463732 Ina           | NM_146100     | 3.72683e-008 | 1.83083 | E15.5 * Wnt1 up vs E15.5 * Sox10 |
| 10426656 Prph          | NM_013639     | 1.13802e-006 | 1.82767 | E15.5 * Wnt1 up vs E15.5 * Sox10 |
| 10351056 Ankrd45       | BC049713      | 9.6995e-005  | 1.8218  | E15.5 * Wnt1 up vs E15.5 * Sox10 |
| 10498965 Npy2r         | NM_008731     | 0.00188441   | 1.81721 | E15.5 * Wnt1 up vs E15.5 * Sox10 |
| 10353731 4930444G20Rik | NM_053264     | 0.000604064  | 1.81712 | E15.5 * Wnt1 up vs E15.5 * Sox10 |
| 10501971 Ank2          | NM_178655     | 4.02894e-008 | 1.81547 | E15.5 * Wnt1 up vs E15.5 * Sox10 |
| 10396270 Dact1         | NM_021532     | 2.93706e-005 | 1.81476 | E15.5 * Wnt1 up vs E15.5 * Sox10 |
| 10395005 Kidins220     | NM_001081378  | 4.77013e-010 | 1.81356 | E15.5 * Wnt1 up vs E15.5 * Sox10 |
| 10447294 Prkce         | NM_011104     | 7.57555e-008 | 1.81001 | E15.5 * Wnt1 up vs E15.5 * Sox10 |
| 10426397 Cntn1         | NM_007727     | 3.46377e-006 | 1.80421 | E15.5 * Wnt1 up vs E15.5 * Sox10 |
| 10595496 Snap91        | NM_013669     | 2.59856e-005 | 1.80382 | E15.5 * Wnt1 up vs E15.5 * Sox10 |
| 10606864 Tceal5        | NM_177919     | 3.05942e-007 | 1.80229 | E15.5 * Wnt1 up vs E15.5 * Sox10 |
| 10575693 Vat1l         | NM_173016     | 5.76565e-006 | 1.79908 | E15.5 * Wnt1 up vs E15.5 * Sox10 |
| 10421924 Pcdh9         | NM_001081377  | 2.8612e-006  | 1.79902 | E15.5 * Wnt1 up vs E15.5 * Sox10 |
| 10422585 Fgf14         | NM_207667     | 2.53817e-005 | 1.79902 | E15.5 * Wnt1 up vs E15.5 * Sox10 |
| 10497012 BC007180      | BC138236      | 3.6768e-008  | 1.79545 | E15.5 * Wnt1 up vs E15.5 * Sox10 |
| 10533401 Cux2          | ENSMUST000001 | 7.69021e-006 | 1.7885  | E15.5 * Wnt1 up vs E15.5 * Sox10 |
| 10366391 Kcnc2         | NM_001025581  | 5.91336e-006 | 1.78713 | E15.5 * Wnt1 up vs E15.5 * Sox10 |
| 10592515 Ubash3b       | NM_176860     | 1.25428e-006 | 1.78601 | E15.5 * Wnt1 up vs E15.5 * Sox10 |
| 10564111               | ---           | 8.7987e-008  | 1.78572 | E15.5 * Wnt1 up vs E15.5 * Sox10 |
| 10468691 Ablim1        | NM_178688     | 9.72708e-008 | 1.7851  | E15.5 * Wnt1 up vs E15.5 * Sox10 |
| 10373113 Kif5a         | NM_008447     | 3.21219e-005 | 1.78167 | E15.5 * Wnt1 up vs E15.5 * Sox10 |
| 10407841 Hecw1         | NM_001081348  | 0.000320121  | 1.78085 | E15.5 * Wnt1 up vs E15.5 * Sox10 |
| 10601903 Zcchc18       | NM_001035510  | 4.58745e-005 | 1.77689 | E15.5 * Wnt1 up vs E15.5 * Sox10 |
| 10472370 Scn2a1        | NM_001099298  | 3.01431e-005 | 1.77591 | E15.5 * Wnt1 up vs E15.5 * Sox10 |
| 10473058 Osbpl6        | NM_145525     | 5.26027e-007 | 1.77571 | E15.5 * Wnt1 up vs E15.5 * Sox10 |
| 10400607 Mdga2         | AK163637      | 0.000188565  | 1.77031 | E15.5 * Wnt1 up vs E15.5 * Sox10 |
| 10544875 Scrn1         | NM_027268     | 0.000190756  | 1.76206 | E15.5 * Wnt1 up vs E15.5 * Sox10 |
| 10498720 Zbbx          | NM_172515     | 1.28198e-007 | 1.75967 | E15.5 * Wnt1 up vs E15.5 * Sox10 |
| 10472376 Scn2a1        | NM_001099298  | 7.80831e-006 | 1.75628 | E15.5 * Wnt1 up vs E15.5 * Sox10 |
| 10587241 Hmgcll1       | NM_173731     | 5.82465e-005 | 1.75199 | E15.5 * Wnt1 up vs E15.5 * Sox10 |
| 10484371 Calcl1        | NM_018782     | 9.06115e-005 | 1.75084 | E15.5 * Wnt1 up vs E15.5 * Sox10 |
| 10505568 Frmd3         | NM_172869     | 1.57323e-005 | 1.73989 | E15.5 * Wnt1 up vs E15.5 * Sox10 |
| 10388465 Doc2b         | NM_007873     | 1.86132e-006 | 1.73684 | E15.5 * Wnt1 up vs E15.5 * Sox10 |
| 10523511 Prkg2         | NM_008926     | 0.000663178  | 1.73537 | E15.5 * Wnt1 up vs E15.5 * Sox10 |
| 10564209               | ---           | 0.000108295  | 1.73467 | E15.5 * Wnt1 up vs E15.5 * Sox10 |

|                        |               |              |         |                                  |
|------------------------|---------------|--------------|---------|----------------------------------|
| 10564203               | ---           | 0.00242945   | 1.73463 | E15.5 * Wnt1 up vs E15.5 * Sox10 |
| 10555197 Mtap6         | NM_010837     | 2.65635e-007 | 1.73243 | E15.5 * Wnt1 up vs E15.5 * Sox10 |
| 10545041 Nap1l5        | NM_021432     | 2.04582e-005 | 1.73239 | E15.5 * Wnt1 up vs E15.5 * Sox10 |
| 10421100 Nefm          | NM_008691     | 8.81605e-009 | 1.73109 | E15.5 * Wnt1 up vs E15.5 * Sox10 |
| 10423230 Cdh9          | NM_009869     | 2.86651e-006 | 1.72796 | E15.5 * Wnt1 up vs E15.5 * Sox10 |
| 10498707 Slitrk3       | NM_198864     | 2.11164e-006 | 1.72704 | E15.5 * Wnt1 up vs E15.5 * Sox10 |
| 10606174 Nap1l2        | NM_008671     | 0.000361216  | 1.72561 | E15.5 * Wnt1 up vs E15.5 * Sox10 |
| 10510725 Chd5          | NM_001081376  | 8.95621e-008 | 1.72529 | E15.5 * Wnt1 up vs E15.5 * Sox10 |
| 10400926 Rtn1          | NM_153457     | 2.03552e-005 | 1.7247  | E15.5 * Wnt1 up vs E15.5 * Sox10 |
| 10398326 Meg3          | NR_003633     | 4.28947e-005 | 1.72434 | E15.5 * Wnt1 up vs E15.5 * Sox10 |
| 10563945               | ---           | 1.97184e-006 | 1.72348 | E15.5 * Wnt1 up vs E15.5 * Sox10 |
| 10480492 Cacna1b       | NM_001042528  | 1.1217e-008  | 1.71825 | E15.5 * Wnt1 up vs E15.5 * Sox10 |
| 10580247 Mast1         | NM_019945     | 3.72732e-006 | 1.71707 | E15.5 * Wnt1 up vs E15.5 * Sox10 |
| 10481772 Garnl3        | NM_178888     | 7.71257e-007 | 1.71655 | E15.5 * Wnt1 up vs E15.5 * Sox10 |
| 10381776 Mapt          | NM_001038609  | 1.03649e-005 | 1.71374 | E15.5 * Wnt1 up vs E15.5 * Sox10 |
| 10405343 Tspan17       | NM_028841     | 3.05032e-006 | 1.71227 | E15.5 * Wnt1 up vs E15.5 * Sox10 |
| 10490856 Raly1         | NM_178631     | 1.16502e-005 | 1.71193 | E15.5 * Wnt1 up vs E15.5 * Sox10 |
| 10598493 Pcsk1n        | NM_013892     | 4.20189e-007 | 1.70775 | E15.5 * Wnt1 up vs E15.5 * Sox10 |
| 10439895 Alcam         | NM_009655     | 1.93098e-005 | 1.70349 | E15.5 * Wnt1 up vs E15.5 * Sox10 |
| 10485979 Gjd2          | NM_010290     | 0.00453875   | 1.70056 | E15.5 * Wnt1 up vs E15.5 * Sox10 |
| 10481857 Pbx3          | NM_016768     | 4.36898e-008 | 1.69978 | E15.5 * Wnt1 up vs E15.5 * Sox10 |
| 10490818 Stmn2         | NM_025285     | 1.38283e-005 | 1.69892 | E15.5 * Wnt1 up vs E15.5 * Sox10 |
| 10580990 Cdh8          | NM_001039154  | 3.75457e-006 | 1.6982  | E15.5 * Wnt1 up vs E15.5 * Sox10 |
| 10454632 Camk4         | NM_009793     | 4.89963e-005 | 1.69719 | E15.5 * Wnt1 up vs E15.5 * Sox10 |
| 10355024 Ica1l         | NM_027407     | 1.81076e-006 | 1.69381 | E15.5 * Wnt1 up vs E15.5 * Sox10 |
| 10483679 Gpr155        | NM_001080707  | 4.3336e-006  | 1.69333 | E15.5 * Wnt1 up vs E15.5 * Sox10 |
| 10420532 Atp8a2        | NM_015803     | 1.04565e-007 | 1.69259 | E15.5 * Wnt1 up vs E15.5 * Sox10 |
| 10368495 Rspo3         | NM_028351     | 2.6952e-006  | 1.69195 | E15.5 * Wnt1 up vs E15.5 * Sox10 |
| 10553773 Gabrb3        | NM_008071     | 7.49176e-007 | 1.69161 | E15.5 * Wnt1 up vs E15.5 * Sox10 |
| 10535577 Tmem130       | NM_177735     | 2.96654e-006 | 1.69008 | E15.5 * Wnt1 up vs E15.5 * Sox10 |
| 10493555 Kcnn3         | NM_080466     | 9.69595e-007 | 1.68636 | E15.5 * Wnt1 up vs E15.5 * Sox10 |
| 10399419 Tubb2b        | NM_023716     | 8.99614e-006 | 1.68546 | E15.5 * Wnt1 up vs E15.5 * Sox10 |
| 10563905               | ---           | 1.64489e-009 | 1.68472 | E15.5 * Wnt1 up vs E15.5 * Sox10 |
| 10563907               | ---           | 1.64489e-009 | 1.68472 | E15.5 * Wnt1 up vs E15.5 * Sox10 |
| 10551065 D930028M14Rik | ENSMUST000001 | 4.23374e-006 | 1.68403 | E15.5 * Wnt1 up vs E15.5 * Sox10 |
| 10600114 Pnma3         | NM_153169     | 2.25998e-005 | 1.68216 | E15.5 * Wnt1 up vs E15.5 * Sox10 |
| 10399208 Tmem196       | ENSMUST000001 | 0.0043903    | 1.68117 | E15.5 * Wnt1 up vs E15.5 * Sox10 |
| 10561335 Prkc3         | NM_008860     | 0.000509916  | 1.67922 | E15.5 * Wnt1 up vs E15.5 * Sox10 |
| 10568109 Asphd1        | NM_001039645  | 2.16453e-005 | 1.67556 | E15.5 * Wnt1 up vs E15.5 * Sox10 |
| 10522208 Uchl1         | NM_011670     | 0.000355637  | 1.67459 | E15.5 * Wnt1 up vs E15.5 * Sox10 |
| 10520527 Dpysl5        | NM_023047     | 1.17078e-005 | 1.67324 | E15.5 * Wnt1 up vs E15.5 * Sox10 |
| 10488387 Napb          | NM_019632     | 1.93161e-006 | 1.67181 | E15.5 * Wnt1 up vs E15.5 * Sox10 |
| 10412466 Hmgcs1        | NM_145942     | 7.26867e-007 | 1.67161 | E15.5 * Wnt1 up vs E15.5 * Sox10 |
| 10592535 Sorl1         | NM_011436     | 3.10561e-008 | 1.67081 | E15.5 * Wnt1 up vs E15.5 * Sox10 |
| 10603814 Slc9a7        | NM_177353     | 2.22778e-005 | 1.66806 | E15.5 * Wnt1 up vs E15.5 * Sox10 |
| 10585484 Chrna5        | NM_176844     | 7.4751e-005  | 1.66763 | E15.5 * Wnt1 up vs E15.5 * Sox10 |
| 10396712 Fut8          | NM_016893     | 6.04156e-006 | 1.66529 | E15.5 * Wnt1 up vs E15.5 * Sox10 |
| 10398356               | ---           | 0.000161125  | 1.66248 | E15.5 * Wnt1 up vs E15.5 * Sox10 |
| 10439016 4930444G20Rik | NM_053264     | 0.00370134   | 1.66118 | E15.5 * Wnt1 up vs E15.5 * Sox10 |
| 10445078 Gabbr1        | NM_019439     | 1.25364e-006 | 1.66094 | E15.5 * Wnt1 up vs E15.5 * Sox10 |
| 10365682 Anks1b        | NM_001128086  | 7.55034e-005 | 1.65739 | E15.5 * Wnt1 up vs E15.5 * Sox10 |
| 10397912 9030205A07Rik | AB257853      | 1.0464e-006  | 1.65686 | E15.5 * Wnt1 up vs E15.5 * Sox10 |
| 10424113 Mal2          | NM_178920     | 0.00198324   | 1.65594 | E15.5 * Wnt1 up vs E15.5 * Sox10 |
| 10461856 Gna14         | NM_008137     | 0.000251687  | 1.65443 | E15.5 * Wnt1 up vs E15.5 * Sox10 |
| 10484503 Lrrc55        | NM_001033346  | 0.000779335  | 1.65306 | E15.5 * Wnt1 up vs E15.5 * Sox10 |
| 10395074 Myt1l         | NM_001093775  | 3.20827e-008 | 1.65223 | E15.5 * Wnt1 up vs E15.5 * Sox10 |
| 10606069 4930444G20Rik | NM_053264     | 0.00360603   | 1.65127 | E15.5 * Wnt1 up vs E15.5 * Sox10 |
| 10494007 Them4         | NM_029431     | 6.85159e-005 | 1.64904 | E15.5 * Wnt1 up vs E15.5 * Sox10 |
| 10590865 Cntn5         | NM_001033359  | 2.00916e-006 | 1.64875 | E15.5 * Wnt1 up vs E15.5 * Sox10 |
| 10408613 Tubb2b        | NM_023716     | 0.000380098  | 1.64575 | E15.5 * Wnt1 up vs E15.5 * Sox10 |
| 10360972 Kcnk2         | NM_010607     | 5.36094e-006 | 1.64546 | E15.5 * Wnt1 up vs E15.5 * Sox10 |
| 10591118 Fat3          | NM_001080814  | 0.00401581   | 1.64404 | E15.5 * Wnt1 up vs E15.5 * Sox10 |
| 10573979 Gnao1         | NM_010308     | 5.72998e-007 | 1.64315 | E15.5 * Wnt1 up vs E15.5 * Sox10 |
| 10553635 Nipa1         | NM_153578     | 4.43235e-006 | 1.64312 | E15.5 * Wnt1 up vs E15.5 * Sox10 |
| 10526614 Actl6b        | NM_031404     | 1.49273e-005 | 1.64223 | E15.5 * Wnt1 up vs E15.5 * Sox10 |
| 10490602 Eef1a2        | NM_007906     | 5.81149e-007 | 1.64211 | E15.5 * Wnt1 up vs E15.5 * Sox10 |

|          |               |              |              |         |                                  |
|----------|---------------|--------------|--------------|---------|----------------------------------|
| 10603768 | Efhc2         | NM_028916    | 1.00349e-005 | 1.64097 | E15.5 * Wnt1 up vs E15.5 * Sox10 |
| 10498647 | B3galnt1      | NM_020026    | 4.10511e-009 | 1.64074 | E15.5 * Wnt1 up vs E15.5 * Sox10 |
| 10416175 | Nefl          | NM_010910    | 2.98244e-005 | 1.64029 | E15.5 * Wnt1 up vs E15.5 * Sox10 |
| 10520304 | Actr3b        | NM_001004365 | 3.22906e-005 | 1.63999 | E15.5 * Wnt1 up vs E15.5 * Sox10 |
| 10354141 | Lonrf2        | NM_001029878 | 0.000605618  | 1.63819 | E15.5 * Wnt1 up vs E15.5 * Sox10 |
| 10506335 | Pde4b         | NM_019840    | 1.88362e-005 | 1.63599 | E15.5 * Wnt1 up vs E15.5 * Sox10 |
| 10563975 | ---           | ---          | 2.58194e-008 | 1.63588 | E15.5 * Wnt1 up vs E15.5 * Sox10 |
| 10563981 | ---           | ---          | 2.58194e-008 | 1.63588 | E15.5 * Wnt1 up vs E15.5 * Sox10 |
| 10563987 | ---           | ---          | 2.58194e-008 | 1.63588 | E15.5 * Wnt1 up vs E15.5 * Sox10 |
| 10564009 | ---           | ---          | 2.58194e-008 | 1.63588 | E15.5 * Wnt1 up vs E15.5 * Sox10 |
| 10545538 | Ctnna2        | NM_009819    | 5.92654e-005 | 1.63486 | E15.5 * Wnt1 up vs E15.5 * Sox10 |
| 10406423 | Mblac2        | NM_028372    | 0.000390604  | 1.6338  | E15.5 * Wnt1 up vs E15.5 * Sox10 |
| 10490665 | Stmn3         | NM_009133    | 2.68928e-005 | 1.6326  | E15.5 * Wnt1 up vs E15.5 * Sox10 |
| 10564053 | 100040985     | XM_001475615 | 3.4264e-009  | 1.63187 | E15.5 * Wnt1 up vs E15.5 * Sox10 |
| 10564055 | ---           | ---          | 3.4264e-009  | 1.63187 | E15.5 * Wnt1 up vs E15.5 * Sox10 |
| 10362005 | Ahi1          | NM_026203    | 1.48428e-005 | 1.63173 | E15.5 * Wnt1 up vs E15.5 * Sox10 |
| 10400126 | Lrn3          | NM_010733    | 1.42169e-007 | 1.63024 | E15.5 * Wnt1 up vs E15.5 * Sox10 |
| 10526564 | Ufsp1         | NM_027356    | 0.00012993   | 1.62997 | E15.5 * Wnt1 up vs E15.5 * Sox10 |
| 10492006 | Trpc4         | NM_016984    | 7.78007e-007 | 1.62948 | E15.5 * Wnt1 up vs E15.5 * Sox10 |
| 10413461 | Erc2          | NM_177814    | 6.14384e-005 | 1.62913 | E15.5 * Wnt1 up vs E15.5 * Sox10 |
| 10518812 | Camta1        | NM_001081557 | 1.14341e-005 | 1.62436 | E15.5 * Wnt1 up vs E15.5 * Sox10 |
| 10482030 | Stom          | NM_013515    | 0.00427246   | 1.62348 | E15.5 * Wnt1 up vs E15.5 * Sox10 |
| 10568982 | BC066028      | NM_001001180 | 8.80736e-005 | 1.62029 | E15.5 * Wnt1 up vs E15.5 * Sox10 |
| 10495623 | ENSMUSG00000  | ENSMUST00000 | 0.0044139    | 1.61984 | E15.5 * Wnt1 up vs E15.5 * Sox10 |
| 10607658 | Reps2         | NM_178256    | 4.88493e-005 | 1.61732 | E15.5 * Wnt1 up vs E15.5 * Sox10 |
| 10428511 | Csmd3         | NM_001081391 | 0.000384332  | 1.61515 | E15.5 * Wnt1 up vs E15.5 * Sox10 |
| 10375019 | Nsg2          | NM_008741    | 2.81097e-005 | 1.61444 | E15.5 * Wnt1 up vs E15.5 * Sox10 |
| 10441195 | Dscam         | NM_031174    | 4.90435e-005 | 1.61369 | E15.5 * Wnt1 up vs E15.5 * Sox10 |
| 10578904 | Cpe           | NM_013494    | 5.33092e-008 | 1.61211 | E15.5 * Wnt1 up vs E15.5 * Sox10 |
| 10476592 | MacroD2       | NM_001013802 | 0.00138626   | 1.61114 | E15.5 * Wnt1 up vs E15.5 * Sox10 |
| 10445338 | Enpp5         | NM_032003    | 3.49511e-005 | 1.611   | E15.5 * Wnt1 up vs E15.5 * Sox10 |
| 10599530 | Rab33a        | NM_011228    | 0.000228895  | 1.60683 | E15.5 * Wnt1 up vs E15.5 * Sox10 |
| 10344973 | Gdap1         | NM_010267    | 0.00152372   | 1.6022  | E15.5 * Wnt1 up vs E15.5 * Sox10 |
| 10501483 | Ntng1         | ENSMUST00000 | 3.4889e-006  | 1.60175 | E15.5 * Wnt1 up vs E15.5 * Sox10 |
| 10430282 | Cacng2        | NM_007583    | 6.69867e-005 | 1.59994 | E15.5 * Wnt1 up vs E15.5 * Sox10 |
| 10355813 | Ptpn          | NM_008985    | 3.43733e-006 | 1.59887 | E15.5 * Wnt1 up vs E15.5 * Sox10 |
| 10400609 | Mdga2         | NM_207010    | 3.92733e-005 | 1.59839 | E15.5 * Wnt1 up vs E15.5 * Sox10 |
| 10602805 | Mtap7d2       | NM_001081124 | 1.82442e-005 | 1.59782 | E15.5 * Wnt1 up vs E15.5 * Sox10 |
| 10445325 | Rcan2         | NM_030598    | 0.000702981  | 1.5978  | E15.5 * Wnt1 up vs E15.5 * Sox10 |
| 10366712 | Ppm1h         | NM_001110218 | 2.00359e-006 | 1.5976  | E15.5 * Wnt1 up vs E15.5 * Sox10 |
| 10441091 | 6530402D11Rik | AK078339     | 1.17246e-005 | 1.59654 | E15.5 * Wnt1 up vs E15.5 * Sox10 |
| 10455108 | Pcdhb16       | NM_053141    | 0.00455055   | 1.59468 | E15.5 * Wnt1 up vs E15.5 * Sox10 |
| 10368598 | Rlbp1l2       | NM_175448    | 0.000924914  | 1.59266 | E15.5 * Wnt1 up vs E15.5 * Sox10 |
| 10604292 | Odz1          | NM_011855    | 0.000167345  | 1.59245 | E15.5 * Wnt1 up vs E15.5 * Sox10 |
| 10353632 | Bai3          | NM_175642    | 7.07362e-006 | 1.5913  | E15.5 * Wnt1 up vs E15.5 * Sox10 |
| 10540509 | Grm7          | NM_177328    | 1.49204e-005 | 1.5908  | E15.5 * Wnt1 up vs E15.5 * Sox10 |
| 10505705 | Sh3gl2        | NM_019535    | 3.41341e-006 | 1.58897 | E15.5 * Wnt1 up vs E15.5 * Sox10 |
| 10465820 | Gng3          | NM_010316    | 0.000376336  | 1.58687 | E15.5 * Wnt1 up vs E15.5 * Sox10 |
| 10527732 | Fry           | ENSMUST00000 | 5.54459e-007 | 1.58673 | E15.5 * Wnt1 up vs E15.5 * Sox10 |
| 10345212 | Khdrbs2       | NM_133235    | 0.000217722  | 1.58593 | E15.5 * Wnt1 up vs E15.5 * Sox10 |
| 10453233 | Slc8a1        | NM_011406    | 2.62272e-006 | 1.58487 | E15.5 * Wnt1 up vs E15.5 * Sox10 |
| 10471994 | Kif5c         | NM_008449    | 4.21939e-005 | 1.58287 | E15.5 * Wnt1 up vs E15.5 * Sox10 |
| 10468762 | 4930506M07Rik | NM_001114312 | 7.36806e-005 | 1.58152 | E15.5 * Wnt1 up vs E15.5 * Sox10 |
| 10593668 | Dmxl2         | NM_172771    | 0.000189475  | 1.58041 | E15.5 * Wnt1 up vs E15.5 * Sox10 |
| 10458767 | Trim36        | NM_178872    | 6.11704e-005 | 1.57731 | E15.5 * Wnt1 up vs E15.5 * Sox10 |
| 10601874 | Tceal3        | NM_001029978 | 7.21579e-006 | 1.57658 | E15.5 * Wnt1 up vs E15.5 * Sox10 |
| 10564157 | ---           | ---          | 0.000872957  | 1.57609 | E15.5 * Wnt1 up vs E15.5 * Sox10 |
| 10496975 | Slc44a5       | NM_001081263 | 0.00169324   | 1.57383 | E15.5 * Wnt1 up vs E15.5 * Sox10 |
| 10428376 | Angpt1        | NM_009640    | 0.00114727   | 1.5731  | E15.5 * Wnt1 up vs E15.5 * Sox10 |
| 10433709 | 2900011O08Rik | NM_144518    | 1.9827e-005  | 1.57277 | E15.5 * Wnt1 up vs E15.5 * Sox10 |
| 10376444 | Hist3h2ba     | NM_030082    | 0.000816147  | 1.56983 | E15.5 * Wnt1 up vs E15.5 * Sox10 |
| 10376216 | Slc36a1       | NM_153139    | 0.000361645  | 1.56944 | E15.5 * Wnt1 up vs E15.5 * Sox10 |
| 10429083 | Kcnq3         | NM_152923    | 1.05294e-007 | 1.56819 | E15.5 * Wnt1 up vs E15.5 * Sox10 |
| 10452935 | Heatr5b       | BC019508     | 0.00065659   | 1.56793 | E15.5 * Wnt1 up vs E15.5 * Sox10 |
| 10406934 | Etv1          | NM_007960    | 4.68414e-006 | 1.56792 | E15.5 * Wnt1 up vs E15.5 * Sox10 |
| 10375360 | Ebf1          | NM_007897    | 0.00162478   | 1.56687 | E15.5 * Wnt1 up vs E15.5 * Sox10 |

|          |                |              |              |         |                                  |
|----------|----------------|--------------|--------------|---------|----------------------------------|
| 10368881 | Armc2          | NM_001034858 | 0.00367728   | 1.56432 | E15.5 * Wnt1 up vs E15.5 * Sox10 |
| 10417124 | B930095G15Rik  | BC096543     | 8.78678e-008 | 1.56335 | E15.5 * Wnt1 up vs E15.5 * Sox10 |
| 10393594 | D11Bwg0517e    | NM_001039167 | 0.000113074  | 1.56259 | E15.5 * Wnt1 up vs E15.5 * Sox10 |
| 10469767 | Nxph2          | NM_008752    | 0.000463642  | 1.56119 | E15.5 * Wnt1 up vs E15.5 * Sox10 |
| 10369835 | Phyhipl        | NM_178621    | 6.48935e-005 | 1.56079 | E15.5 * Wnt1 up vs E15.5 * Sox10 |
| 10356712 | Kif1a          | NM_008440    | 1.16179e-006 | 1.56032 | E15.5 * Wnt1 up vs E15.5 * Sox10 |
| 10443690 | Glp1r          | NM_021332    | 0.000747874  | 1.55935 | E15.5 * Wnt1 up vs E15.5 * Sox10 |
| 10417787 | Gng2           | NM_010315    | 2.99683e-007 | 1.55928 | E15.5 * Wnt1 up vs E15.5 * Sox10 |
| 10589800 | Clasp2         | NM_001114347 | 2.40545e-009 | 1.55888 | E15.5 * Wnt1 up vs E15.5 * Sox10 |
| 10412066 | Rab3c          | NM_023852    | 0.000212421  | 1.55599 | E15.5 * Wnt1 up vs E15.5 * Sox10 |
| 10448557 | Abca3          | NM_013855    | 0.000604558  | 1.55524 | E15.5 * Wnt1 up vs E15.5 * Sox10 |
| 10347073 | Unc80          | FJ210934     | 3.79886e-006 | 1.55425 | E15.5 * Wnt1 up vs E15.5 * Sox10 |
| 10471842 | ---            | ---          | 0.000912043  | 1.55358 | E15.5 * Wnt1 up vs E15.5 * Sox10 |
| 10601343 | Magee1         | NM_053201    | 0.00157763   | 1.55333 | E15.5 * Wnt1 up vs E15.5 * Sox10 |
| 10594800 | B230380D07Rik  | NM_172772    | 0.00467821   | 1.55173 | E15.5 * Wnt1 up vs E15.5 * Sox10 |
| 10521972 | Pcdh7          | NM_018764    | 6.56205e-006 | 1.5513  | E15.5 * Wnt1 up vs E15.5 * Sox10 |
| 10514779 | Prkaa2         | NM_178143    | 4.17391e-005 | 1.55043 | E15.5 * Wnt1 up vs E15.5 * Sox10 |
| 10392601 | Abca6          | NM_147218    | 0.00020627   | 1.54852 | E15.5 * Wnt1 up vs E15.5 * Sox10 |
| 10428388 | Rspo2          | NM_172815    | 0.000364435  | 1.54788 | E15.5 * Wnt1 up vs E15.5 * Sox10 |
| 10347781 | 9430031J16Rik  | BC082310     | 0.000188884  | 1.54755 | E15.5 * Wnt1 up vs E15.5 * Sox10 |
| 10424082 | Aard           | NM_175503    | 0.000359673  | 1.54654 | E15.5 * Wnt1 up vs E15.5 * Sox10 |
| 10462922 | Pfce1          | NM_019588    | 4.48118e-008 | 1.54472 | E15.5 * Wnt1 up vs E15.5 * Sox10 |
| 10588380 | Cpne4          | NM_028719    | 1.14585e-005 | 1.54433 | E15.5 * Wnt1 up vs E15.5 * Sox10 |
| 10348451 | Cxcr7          | NM_007722    | 0.000201866  | 1.54362 | E15.5 * Wnt1 up vs E15.5 * Sox10 |
| 10439651 | Cd200          | NM_010818    | 0.000192668  | 1.54263 | E15.5 * Wnt1 up vs E15.5 * Sox10 |
| 10548030 | Cd9            | NM_007657    | 0.000348583  | 1.54195 | E15.5 * Wnt1 up vs E15.5 * Sox10 |
| 10353460 | Kcnq5          | NM_023872    | 1.93624e-005 | 1.54136 | E15.5 * Wnt1 up vs E15.5 * Sox10 |
| 10411519 | Mtap1b         | NM_008634    | 9.49036e-006 | 1.54101 | E15.5 * Wnt1 up vs E15.5 * Sox10 |
| 10564211 | Snrpn          | NM_013670    | 1.6264e-008  | 1.54069 | E15.5 * Wnt1 up vs E15.5 * Sox10 |
| 10476512 | Snap25         | NM_011428    | 3.38115e-005 | 1.54062 | E15.5 * Wnt1 up vs E15.5 * Sox10 |
| 10519612 | 9330182L06Rik  | NM_172706    | 0.000131606  | 1.54041 | E15.5 * Wnt1 up vs E15.5 * Sox10 |
| 10425852 | Parvb          | NM_133167    | 0.00103877   | 1.5404  | E15.5 * Wnt1 up vs E15.5 * Sox10 |
| 10423505 | Cmb1           | NM_181588    | 0.000405996  | 1.54018 | E15.5 * Wnt1 up vs E15.5 * Sox10 |
| 10455128 | Pcdhb20        | NM_053145    | 0.00324949   | 1.54009 | E15.5 * Wnt1 up vs E15.5 * Sox10 |
| 10395961 | Lrnf5          | NM_178714    | 7.25991e-005 | 1.53833 | E15.5 * Wnt1 up vs E15.5 * Sox10 |
| 10377368 | Rpl26          | NM_009080    | 0.00231574   | 1.53703 | E15.5 * Wnt1 up vs E15.5 * Sox10 |
| 10395805 | 1700047117Rik1 | BC049669     | 5.7338e-006  | 1.53436 | E15.5 * Wnt1 up vs E15.5 * Sox10 |
| 10503902 | Cnr1           | NM_007726    | 0.000156593  | 1.53413 | E15.5 * Wnt1 up vs E15.5 * Sox10 |
| 10455259 | Atlgap26       | NM_175164    | 1.25e-005    | 1.53296 | E15.5 * Wnt1 up vs E15.5 * Sox10 |
| 10396125 | Atf1           | NM_178628    | 0.000561107  | 1.53268 | E15.5 * Wnt1 up vs E15.5 * Sox10 |
| 10372988 | Slc16a7        | NM_011391    | 0.000294543  | 1.5296  | E15.5 * Wnt1 up vs E15.5 * Sox10 |
| 10514352 | Elavl2         | NM_207685    | 0.000134223  | 1.5288  | E15.5 * Wnt1 up vs E15.5 * Sox10 |
| 10573348 | Cacna1a        | NM_007578    | 4.20516e-006 | 1.52802 | E15.5 * Wnt1 up vs E15.5 * Sox10 |
| 10474096 | Lrrc4c         | NM_178725    | 1.55357e-005 | 1.52797 | E15.5 * Wnt1 up vs E15.5 * Sox10 |
| 10428407 | Tmem74         | NM_175502    | 0.00015022   | 1.52635 | E15.5 * Wnt1 up vs E15.5 * Sox10 |
| 10373542 | Dgka           | NM_016811    | 2.63127e-006 | 1.52596 | E15.5 * Wnt1 up vs E15.5 * Sox10 |
| 10442069 | Lix1           | NM_025681    | 0.00389538   | 1.525   | E15.5 * Wnt1 up vs E15.5 * Sox10 |
| 10583195 | ENSMUSG0000C   | ENSMUST00000 | 0.000887104  | 1.52379 | E15.5 * Wnt1 up vs E15.5 * Sox10 |
| 10488617 | Nrsn2          | NM_001009948 | 0.000370055  | 1.52245 | E15.5 * Wnt1 up vs E15.5 * Sox10 |
| 10563909 | ---            | ---          | 1.14834e-007 | 1.52234 | E15.5 * Wnt1 up vs E15.5 * Sox10 |
| 10602704 | Klf8           | NM_173780    | 3.54295e-007 | 1.51974 | E15.5 * Wnt1 up vs E15.5 * Sox10 |
| 10350438 | Kcnt2          | NM_001081027 | 0.00407409   | 1.51953 | E15.5 * Wnt1 up vs E15.5 * Sox10 |
| 10601834 | Gprasp1        | NM_026081    | 0.000538682  | 1.51867 | E15.5 * Wnt1 up vs E15.5 * Sox10 |
| 10598359 | Syp            | NM_009305    | 2.69062e-005 | 1.51638 | E15.5 * Wnt1 up vs E15.5 * Sox10 |
| 10483624 | Dlx1as         | NR_002854    | 0.000423953  | 1.51615 | E15.5 * Wnt1 up vs E15.5 * Sox10 |
| 10490794 | Pkia           | NM_008862    | 0.000226032  | 1.51589 | E15.5 * Wnt1 up vs E15.5 * Sox10 |
| 10389617 | Ppm1e          | NM_177167    | 3.73624e-005 | 1.51394 | E15.5 * Wnt1 up vs E15.5 * Sox10 |
| 10504375 | Npr2           | NM_173788    | 0.000786124  | 1.51282 | E15.5 * Wnt1 up vs E15.5 * Sox10 |
| 10362372 | 9330159F19Rik  | BC138282     | 0.00101346   | 1.5128  | E15.5 * Wnt1 up vs E15.5 * Sox10 |
| 10604347 | Smarca1        | NM_053123    | 6.18054e-005 | 1.51231 | E15.5 * Wnt1 up vs E15.5 * Sox10 |
| 10523190 | 9130213B05Rik  | BC006604     | 6.54606e-005 | 1.5119  | E15.5 * Wnt1 up vs E15.5 * Sox10 |
| 10476326 | Cds2           | NM_138651    | 3.53521e-005 | 1.51155 | E15.5 * Wnt1 up vs E15.5 * Sox10 |
| 10546855 | Srgap3         | NM_080448    | 1.22131e-007 | 1.51148 | E15.5 * Wnt1 up vs E15.5 * Sox10 |
| 10552929 | Lin7b          | NM_011698    | 0.000951556  | 1.51127 | E15.5 * Wnt1 up vs E15.5 * Sox10 |
| 10593499 | AI593442       | NM_178906    | 3.79032e-005 | 1.50893 | E15.5 * Wnt1 up vs E15.5 * Sox10 |
| 10535053 | Prkar1b        | NM_008923    | 1.54218e-005 | 1.50806 | E15.5 * Wnt1 up vs E15.5 * Sox10 |

|          |                |               |              |         |                                  |
|----------|----------------|---------------|--------------|---------|----------------------------------|
| 10462281 | Vldlr          | NM_013703     | 0.000162623  | 1.50804 | E15.5 * Wnt1 up vs E15.5 * Sox10 |
| 10504692 | Tmod1          | NM_021883     | 0.000211821  | 1.50803 | E15.5 * Wnt1 up vs E15.5 * Sox10 |
| 10458828 | Cdo1           | NM_033037     | 8.91218e-005 | 1.50788 | E15.5 * Wnt1 up vs E15.5 * Sox10 |
| 10473349 | Ypel4          | NM_001005342  | 0.000185821  | 1.50756 | E15.5 * Wnt1 up vs E15.5 * Sox10 |
| 10549879 | Usp29          | NM_021323     | 0.000117754  | 1.50725 | E15.5 * Wnt1 up vs E15.5 * Sox10 |
| 10439514 | Gap43          | NM_008083     | 7.07723e-006 | 1.50715 | E15.5 * Wnt1 up vs E15.5 * Sox10 |
| 10495613 | 4833424O15Rik  | NM_029425     | 0.000595201  | 1.5054  | E15.5 * Wnt1 up vs E15.5 * Sox10 |
| 10396314 | Lrrc9          | NM_001142728  | 0.000131539  | 1.50509 | E15.5 * Wnt1 up vs E15.5 * Sox10 |
| 10491627 | 4932438A13Rik  | NM_172679     | 0.00110027   | 1.50465 | E15.5 * Wnt1 up vs E15.5 * Sox10 |
| 10496262 | Nhedc2         | NM_178877     | 0.000382459  | 1.50253 | E15.5 * Wnt1 up vs E15.5 * Sox10 |
| 10555118 | Pak1           | NM_011035     | 3.3465e-006  | 1.50002 | E15.5 * Wnt1 up vs E15.5 * Sox10 |
| 10520544 | Mapre3         | NM_133350     | 0.000784286  | 1.49904 | E15.5 * Wnt1 up vs E15.5 * Sox10 |
| 10476596 | MacroD2        | NM_001013802  | 0.000203219  | 1.49877 | E15.5 * Wnt1 up vs E15.5 * Sox10 |
| 10542414 | Ptpro          | NM_011216     | 0.000259315  | 1.49867 | E15.5 * Wnt1 up vs E15.5 * Sox10 |
| 10490802 | Fam164a        | NM_173181     | 0.00405084   | 1.4976  | E15.5 * Wnt1 up vs E15.5 * Sox10 |
| 10563899 | ---            | ---           | 1.59124e-009 | 1.4961  | E15.5 * Wnt1 up vs E15.5 * Sox10 |
| 10452295 | Tubb4          | NM_009451     | 0.00124167   | 1.49513 | E15.5 * Wnt1 up vs E15.5 * Sox10 |
| 10595033 | Scg3           | NM_009130     | 2.79465e-005 | 1.49501 | E15.5 * Wnt1 up vs E15.5 * Sox10 |
| 10356880 | St8sia4        | NM_009183     | 7.15975e-005 | 1.49308 | E15.5 * Wnt1 up vs E15.5 * Sox10 |
| 10593634 | Elmod1         | NM_177769     | 0.0015723    | 1.49268 | E15.5 * Wnt1 up vs E15.5 * Sox10 |
| 10536611 | Kcnd2          | NM_019697     | 0.000354128  | 1.49234 | E15.5 * Wnt1 up vs E15.5 * Sox10 |
| 10395770 | 1700047117Rik1 | BC048158      | 3.89528e-006 | 1.49218 | E15.5 * Wnt1 up vs E15.5 * Sox10 |
| 10395780 | 1700047117Rik1 | BC048158      | 3.89528e-006 | 1.49218 | E15.5 * Wnt1 up vs E15.5 * Sox10 |
| 10604906 | Ids            | NM_010498     | 2.26667e-005 | 1.49184 | E15.5 * Wnt1 up vs E15.5 * Sox10 |
| 10443383 | Tmhs           | NM_026571     | 0.00173285   | 1.4913  | E15.5 * Wnt1 up vs E15.5 * Sox10 |
| 10439695 | Tagln3         | NM_019754     | 7.96163e-005 | 1.4907  | E15.5 * Wnt1 up vs E15.5 * Sox10 |
| 10547807 | Eno2           | NM_013509     | 0.00011998   | 1.49033 | E15.5 * Wnt1 up vs E15.5 * Sox10 |
| 10366725 | Fam19a2        | NM_182807     | 1.19365e-006 | 1.48983 | E15.5 * Wnt1 up vs E15.5 * Sox10 |
| 10578679 | ENSMUSG00000   | ENSMUST000001 | 1.20626e-005 | 1.4897  | E15.5 * Wnt1 up vs E15.5 * Sox10 |
| 10577996 | Unc5d          | NM_153135     | 0.000521404  | 1.48945 | E15.5 * Wnt1 up vs E15.5 * Sox10 |
| 10385203 | Odz2           | NM_011856     | 7.65694e-005 | 1.48913 | E15.5 * Wnt1 up vs E15.5 * Sox10 |
| 10486201 | OTTMUSG00000   | ENSMUST000001 | 0.00353254   | 1.48727 | E15.5 * Wnt1 up vs E15.5 * Sox10 |
| 10532586 | Myo18b         | BC145218      | 0.00135523   | 1.48626 | E15.5 * Wnt1 up vs E15.5 * Sox10 |
| 10395273 | Gdap10         | BC052902      | 0.00323358   | 1.48555 | E15.5 * Wnt1 up vs E15.5 * Sox10 |
| 10397633 | Flrt2          | NM_201518     | 0.000195004  | 1.48533 | E15.5 * Wnt1 up vs E15.5 * Sox10 |
| 10440849 | Synj1          | ENSMUST000001 | 1.9801e-006  | 1.48502 | E15.5 * Wnt1 up vs E15.5 * Sox10 |
| 10352980 | Sntg1          | NM_027671     | 4.90982e-005 | 1.48468 | E15.5 * Wnt1 up vs E15.5 * Sox10 |
| 10564235 | ---            | ---           | 0.00467696   | 1.48437 | E15.5 * Wnt1 up vs E15.5 * Sox10 |
| 10497663 | Slc7a14        | NM_172861     | 0.000210853  | 1.48393 | E15.5 * Wnt1 up vs E15.5 * Sox10 |
| 10458685 | Jakmip2        | ENSMUST000001 | 0.00499914   | 1.48293 | E15.5 * Wnt1 up vs E15.5 * Sox10 |
| 10559580 | Syt5           | NM_016908     | 0.000104272  | 1.48289 | E15.5 * Wnt1 up vs E15.5 * Sox10 |
| 10399121 | Ptprn2         | NM_011215     | 3.30671e-006 | 1.48264 | E15.5 * Wnt1 up vs E15.5 * Sox10 |
| 10603843 | Syn1           | NM_013680     | 2.52269e-005 | 1.48207 | E15.5 * Wnt1 up vs E15.5 * Sox10 |
| 10554166 | Akap13         | NM_029332     | 2.61403e-007 | 1.48203 | E15.5 * Wnt1 up vs E15.5 * Sox10 |
| 10361642 | Lrp11          | NM_172784     | 0.00189049   | 1.48187 | E15.5 * Wnt1 up vs E15.5 * Sox10 |
| 10455292 | 2900055J20Rik  | ENSMUST000001 | 0.000315646  | 1.48103 | E15.5 * Wnt1 up vs E15.5 * Sox10 |
| 10384233 | Tns3           | NM_001083587  | 5.33622e-005 | 1.47909 | E15.5 * Wnt1 up vs E15.5 * Sox10 |
| 10384797 | Ccdc85a        | NM_181577     | 1.79499e-005 | 1.47803 | E15.5 * Wnt1 up vs E15.5 * Sox10 |
| 10601412 | Lpar4          | NM_175271     | 1.00979e-006 | 1.4755  | E15.5 * Wnt1 up vs E15.5 * Sox10 |
| 10578957 | ---            | ---           | 0.00266613   | 1.47527 | E15.5 * Wnt1 up vs E15.5 * Sox10 |
| 10430968 | A4galt         | NM_001004150  | 0.00040338   | 1.47373 | E15.5 * Wnt1 up vs E15.5 * Sox10 |
| 10444756 | Atp6v1g2       | NM_023179     | 0.000765454  | 1.47281 | E15.5 * Wnt1 up vs E15.5 * Sox10 |
| 10454441 | Syt4           | NM_009308     | 0.00275592   | 1.47269 | E15.5 * Wnt1 up vs E15.5 * Sox10 |
| 10401987 | Kcnk10         | NM_029911     | 0.000716734  | 1.47141 | E15.5 * Wnt1 up vs E15.5 * Sox10 |
| 10501374 | 5330417C22Rik  | NM_001033304  | 4.34364e-006 | 1.47124 | E15.5 * Wnt1 up vs E15.5 * Sox10 |
| 10537880 | ---            | ---           | 0.000234884  | 1.47081 | E15.5 * Wnt1 up vs E15.5 * Sox10 |
| 10442580 | Rps2           | NM_008503     | 1.45299e-005 | 1.47003 | E15.5 * Wnt1 up vs E15.5 * Sox10 |
| 10598138 | Spry3          | NM_001030293  | 0.00253207   | 1.46941 | E15.5 * Wnt1 up vs E15.5 * Sox10 |
| 10564233 | ---            | ---           | 0.00220062   | 1.46749 | E15.5 * Wnt1 up vs E15.5 * Sox10 |
| 10529656 | Nsg1           | NM_010942     | 7.11259e-006 | 1.46648 | E15.5 * Wnt1 up vs E15.5 * Sox10 |
| 10540298 | Chl1           | NM_007697     | 0.000102155  | 1.46624 | E15.5 * Wnt1 up vs E15.5 * Sox10 |
| 10420785 | Mttr9          | ENSMUST000001 | 0.00379415   | 1.46597 | E15.5 * Wnt1 up vs E15.5 * Sox10 |
| 10555235 | Arrb1          | NM_177231     | 8.46678e-007 | 1.46499 | E15.5 * Wnt1 up vs E15.5 * Sox10 |
| 10436196 | ---            | ---           | 0.000153591  | 1.46485 | E15.5 * Wnt1 up vs E15.5 * Sox10 |
| 10524909 | Nos1           | NM_008712     | 5.8779e-005  | 1.46455 | E15.5 * Wnt1 up vs E15.5 * Sox10 |
| 10508436 | Sync           | NM_023485     | 5.64188e-005 | 1.46421 | E15.5 * Wnt1 up vs E15.5 * Sox10 |

|          |               |              |              |         |                                  |
|----------|---------------|--------------|--------------|---------|----------------------------------|
| 10571353 | 6430573F11Rik | BC052184     | 0.000215764  | 1.46302 | E15.5 * Wnt1 up vs E15.5 * Sox10 |
| 10409737 | Agtpbp1       | NM_023328    | 2.9362e-006  | 1.46063 | E15.5 * Wnt1 up vs E15.5 * Sox10 |
| 10364712 | Cirbp         | NM_007705    | 0.00202845   | 1.45907 | E15.5 * Wnt1 up vs E15.5 * Sox10 |
| 10546853 | Srgap3        | NM_080448    | 1.38075e-005 | 1.45893 | E15.5 * Wnt1 up vs E15.5 * Sox10 |
| 10524312 | Ttc28         | ENSMUST00000 | 0.000184278  | 1.45777 | E15.5 * Wnt1 up vs E15.5 * Sox10 |
| 10356177 | Dner          | NM_152915    | 0.000992074  | 1.45742 | E15.5 * Wnt1 up vs E15.5 * Sox10 |
| 10362171 | Stx7          | NM_016797    | 5.67377e-006 | 1.4571  | E15.5 * Wnt1 up vs E15.5 * Sox10 |
| 10356305 | Htr2b         | NM_008311    | 0.000644492  | 1.457   | E15.5 * Wnt1 up vs E15.5 * Sox10 |
| 10519913 | Magi2         | NM_015823    | 0.00151778   | 1.45687 | E15.5 * Wnt1 up vs E15.5 * Sox10 |
| 10448247 | Zfp40         | NM_009555    | 0.00376292   | 1.4567  | E15.5 * Wnt1 up vs E15.5 * Sox10 |
| 10599736 | Fhl1          | NM_001077361 | 6.50841e-007 | 1.45653 | E15.5 * Wnt1 up vs E15.5 * Sox10 |
| 10462957 | Tbc1d12       | NM_145952    | 0.00141651   | 1.45606 | E15.5 * Wnt1 up vs E15.5 * Sox10 |
| 10366707 | Avpr1a        | NM_016847    | 0.000271676  | 1.4548  | E15.5 * Wnt1 up vs E15.5 * Sox10 |
| 10381187 | Atp6v0a1      | NM_016920    | 3.84928e-006 | 1.45424 | E15.5 * Wnt1 up vs E15.5 * Sox10 |
| 10423855 | Rims2         | NM_053271    | 0.000304594  | 1.45397 | E15.5 * Wnt1 up vs E15.5 * Sox10 |
| 10363415 | Spock2        | NM_052994    | 0.000265429  | 1.45392 | E15.5 * Wnt1 up vs E15.5 * Sox10 |
| 10485840 | Ryr3          | NM_177652    | 3.18176e-007 | 1.45259 | E15.5 * Wnt1 up vs E15.5 * Sox10 |
| 10366346 | Phlda1        | NM_009344    | 1.5025e-005  | 1.45202 | E15.5 * Wnt1 up vs E15.5 * Sox10 |
| 10522976 | Rufy3         | NM_027530    | 2.86478e-007 | 1.44961 | E15.5 * Wnt1 up vs E15.5 * Sox10 |
| 10604380 | Zdhhc9        | NM_172465    | 9.89142e-005 | 1.44901 | E15.5 * Wnt1 up vs E15.5 * Sox10 |
| 10541968 | Ano2          | NM_153589    | 2.11477e-005 | 1.44781 | E15.5 * Wnt1 up vs E15.5 * Sox10 |
| 10411395 | Rgnf          | NM_012026    | 8.14823e-005 | 1.44772 | E15.5 * Wnt1 up vs E15.5 * Sox10 |
| 10398727 | Klc1          | NM_001025360 | 0.000171874  | 1.44753 | E15.5 * Wnt1 up vs E15.5 * Sox10 |
| 10595013 | Tmod2         | NM_016711    | 6.01715e-006 | 1.44741 | E15.5 * Wnt1 up vs E15.5 * Sox10 |
| 10390117 | Itga3         | NM_013565    | 0.000135698  | 1.44729 | E15.5 * Wnt1 up vs E15.5 * Sox10 |
| 10359480 | Dnm3          | NM_001038619 | 0.000252734  | 1.44622 | E15.5 * Wnt1 up vs E15.5 * Sox10 |
| 10528090 | Rundc3b       | NM_198620    | 0.000790628  | 1.4458  | E15.5 * Wnt1 up vs E15.5 * Sox10 |
| 10529923 | Lcorl         | NM_172153    | 0.000430403  | 1.44566 | E15.5 * Wnt1 up vs E15.5 * Sox10 |
| 10567289 | Syt17         | NM_138649    | 0.00018872   | 1.44553 | E15.5 * Wnt1 up vs E15.5 * Sox10 |
| 10360418 | Rgs7          | NM_011880    | 0.00393864   | 1.44514 | E15.5 * Wnt1 up vs E15.5 * Sox10 |
| 10601846 | 2900062L11Rik | NR_003642    | 0.000861974  | 1.44484 | E15.5 * Wnt1 up vs E15.5 * Sox10 |
| 10495343 | Wdr47         | NM_181400    | 0.0018031    | 1.44469 | E15.5 * Wnt1 up vs E15.5 * Sox10 |
| 10571567 | Sorbs2        | NM_172752    | 2.9169e-006  | 1.44381 | E15.5 * Wnt1 up vs E15.5 * Sox10 |
| 10411156 | Scamp1        | NM_029153    | 8.59057e-007 | 1.44334 | E15.5 * Wnt1 up vs E15.5 * Sox10 |
| 10368373 | C030003D03Rik | NM_029881    | 0.000334314  | 1.44289 | E15.5 * Wnt1 up vs E15.5 * Sox10 |
| 10505030 | Fsd1l         | NM_176966    | 0.0009588    | 1.44166 | E15.5 * Wnt1 up vs E15.5 * Sox10 |
| 10547282 | Zfp9          | NM_011763    | 0.000643646  | 1.4407  | E15.5 * Wnt1 up vs E15.5 * Sox10 |
| 10531653 | BC062109      | BC055321     | 0.00330546   | 1.44065 | E15.5 * Wnt1 up vs E15.5 * Sox10 |
| 10559837 | Vmn2r29       | NR_003555    | 4.51092e-005 | 1.44042 | E15.5 * Wnt1 up vs E15.5 * Sox10 |
| 10363696 | D630028G08Rik | AK038706     | 0.00240225   | 1.43945 | E15.5 * Wnt1 up vs E15.5 * Sox10 |
| 10419416 | 3632451O06Rik | NM_026142    | 0.00140547   | 1.43899 | E15.5 * Wnt1 up vs E15.5 * Sox10 |
| 10417048 | Hs6st3        | NM_015820    | 7.27565e-005 | 1.4389  | E15.5 * Wnt1 up vs E15.5 * Sox10 |
| 10560911 | Rabac1        | NM_010261    | 0.000128791  | 1.43778 | E15.5 * Wnt1 up vs E15.5 * Sox10 |
| 10502419 | Rap1gds1      | NM_001040690 | 1.42609e-005 | 1.43773 | E15.5 * Wnt1 up vs E15.5 * Sox10 |
| 10491625 | 4932438A13Rik | NM_172679    | 0.00196823   | 1.43754 | E15.5 * Wnt1 up vs E15.5 * Sox10 |
| 10473244 | Zfp804a       | NM_175513    | 0.000385834  | 1.4362  | E15.5 * Wnt1 up vs E15.5 * Sox10 |
| 10359861 | Mgst3         | NM_025569    | 0.00342721   | 1.43551 | E15.5 * Wnt1 up vs E15.5 * Sox10 |
| 10412345 | Parp8         | NM_001081009 | 0.000399082  | 1.43521 | E15.5 * Wnt1 up vs E15.5 * Sox10 |
| 10411782 | Pik3r1        | NM_001077495 | 1.31449e-005 | 1.43416 | E15.5 * Wnt1 up vs E15.5 * Sox10 |
| 10439881 | 5330426P16Rik | ENSMUST00000 | 0.000188133  | 1.43392 | E15.5 * Wnt1 up vs E15.5 * Sox10 |
| 10496854 | Tll7          | NM_027594    | 0.000587547  | 1.43325 | E15.5 * Wnt1 up vs E15.5 * Sox10 |
| 10438358 | 05-Sep        | NM_213614    | 8.07763e-007 | 1.43252 | E15.5 * Wnt1 up vs E15.5 * Sox10 |
| 10491136 | Tnik          | BC137799     | 4.77873e-007 | 1.43209 | E15.5 * Wnt1 up vs E15.5 * Sox10 |
| 10490569 | Kcng2         | NM_010611    | 1.63912e-005 | 1.43174 | E15.5 * Wnt1 up vs E15.5 * Sox10 |
| 10389738 | Dgke          | NM_019505    | 4.54564e-005 | 1.43019 | E15.5 * Wnt1 up vs E15.5 * Sox10 |
| 10345580 | Inpp4a        | NM_030266    | 5.69765e-005 | 1.43013 | E15.5 * Wnt1 up vs E15.5 * Sox10 |
| 10591116 | Fat3          | NM_001080814 | 0.000212333  | 1.42923 | E15.5 * Wnt1 up vs E15.5 * Sox10 |
| 10355474 | March4        | NM_001045533 | 0.000323493  | 1.42903 | E15.5 * Wnt1 up vs E15.5 * Sox10 |
| 10588876 | Nicn1         | NM_025449    | 0.0025259    | 1.42783 | E15.5 * Wnt1 up vs E15.5 * Sox10 |
| 10431051 | Scube1        | NM_022723    | 0.000265587  | 1.42706 | E15.5 * Wnt1 up vs E15.5 * Sox10 |
| 10356968 | Pam           | NM_013626    | 0.000157423  | 1.42639 | E15.5 * Wnt1 up vs E15.5 * Sox10 |
| 10446376 | Man2a1        | NM_008549    | 1.06103e-005 | 1.42627 | E15.5 * Wnt1 up vs E15.5 * Sox10 |
| 10525195 | AU042671      | ENSMUST00000 | 0.00092588   | 1.42536 | E15.5 * Wnt1 up vs E15.5 * Sox10 |
| 10406229 | Pcsk1         | NM_013628    | 0.000769915  | 1.42349 | E15.5 * Wnt1 up vs E15.5 * Sox10 |
| 10511290 | Tnfrsf18      | NM_009400    | 0.000477082  | 1.42307 | E15.5 * Wnt1 up vs E15.5 * Sox10 |
| 10455071 | Pcdhb7        | NM_053132    | 0.00344999   | 1.42253 | E15.5 * Wnt1 up vs E15.5 * Sox10 |

|                        |               |              |         |                                  |
|------------------------|---------------|--------------|---------|----------------------------------|
| 10481592 Dnm1          | NM_010065     | 0.000264011  | 1.42239 | E15.5 * Wnt1 up vs E15.5 * Sox10 |
| 10591706 Elavl3        | NM_010487     | 0.00259639   | 1.42168 | E15.5 * Wnt1 up vs E15.5 * Sox10 |
| 10448094 Lnpep         | NM_172827     | 0.000114059  | 1.42137 | E15.5 * Wnt1 up vs E15.5 * Sox10 |
| 10465314 Capn1         | NM_007600     | 0.00048004   | 1.42133 | E15.5 * Wnt1 up vs E15.5 * Sox10 |
| 10534041 Stx2          | NM_007941     | 0.000132078  | 1.41993 | E15.5 * Wnt1 up vs E15.5 * Sox10 |
| 10417628 Cadps         | NM_012061     | 0.00216029   | 1.41987 | E15.5 * Wnt1 up vs E15.5 * Sox10 |
| 10563897               | ---           | 0.00177059   | 1.41945 | E15.5 * Wnt1 up vs E15.5 * Sox10 |
| 10433403 A2bp1         | NM_021477     | 0.000248848  | 1.41799 | E15.5 * Wnt1 up vs E15.5 * Sox10 |
| 10348493 Lrrfip1       | NM_008515     | 1.57736e-006 | 1.41761 | E15.5 * Wnt1 up vs E15.5 * Sox10 |
| 10576934 Fam155a       | NM_173446     | 0.000218744  | 1.41749 | E15.5 * Wnt1 up vs E15.5 * Sox10 |
| 10594679 Tln2          | NM_001081242  | 2.82642e-005 | 1.41732 | E15.5 * Wnt1 up vs E15.5 * Sox10 |
| 10441680 Pde10a        | NM_011866     | 1.18866e-006 | 1.41659 | E15.5 * Wnt1 up vs E15.5 * Sox10 |
| 10485582 Tcp11l1       | NM_177190     | 0.00040427   | 1.41616 | E15.5 * Wnt1 up vs E15.5 * Sox10 |
| 10392056 Cyb561        | NM_007805     | 0.00250791   | 1.4148  | E15.5 * Wnt1 up vs E15.5 * Sox10 |
| 10456161 Htr4          | NM_008313     | 3.82212e-005 | 1.41475 | E15.5 * Wnt1 up vs E15.5 * Sox10 |
| 10535065 Adap1         | NM_172723     | 0.000197663  | 1.41454 | E15.5 * Wnt1 up vs E15.5 * Sox10 |
| 10553501 Slc17a6       | NM_080853     | 0.00184745   | 1.41396 | E15.5 * Wnt1 up vs E15.5 * Sox10 |
| 10524889 Ksr2          | NM_001114545  | 0.000103196  | 1.41231 | E15.5 * Wnt1 up vs E15.5 * Sox10 |
| 10431711 Slc2a13       | NM_001033633  | 0.000329911  | 1.41134 | E15.5 * Wnt1 up vs E15.5 * Sox10 |
| 10441361 Tiam2         | NM_001122998  | 0.000206223  | 1.41062 | E15.5 * Wnt1 up vs E15.5 * Sox10 |
| 10558468 Jakmip3       | BC119557      | 0.000619243  | 1.41041 | E15.5 * Wnt1 up vs E15.5 * Sox10 |
| 10407370 4833420G17Rik | NM_001113550  | 0.000318813  | 1.41017 | E15.5 * Wnt1 up vs E15.5 * Sox10 |
| 10588592 Cacna2d2      | NM_020263     | 1.82176e-005 | 1.41012 | E15.5 * Wnt1 up vs E15.5 * Sox10 |
| 10583179 Pgr           | NM_008829     | 0.000175366  | 1.40984 | E15.5 * Wnt1 up vs E15.5 * Sox10 |
| 10344990 Crisp1d1      | NM_031402     | 9.90672e-006 | 1.40947 | E15.5 * Wnt1 up vs E15.5 * Sox10 |
| 10498885 Gria2         | NM_013540     | 0.0038245    | 1.40864 | E15.5 * Wnt1 up vs E15.5 * Sox10 |
| 10604932 Cd99l2        | NM_138309     | 0.00147043   | 1.40838 | E15.5 * Wnt1 up vs E15.5 * Sox10 |
| 10350113 Arl8a         | NM_026823     | 0.000704123  | 1.40812 | E15.5 * Wnt1 up vs E15.5 * Sox10 |
| 10572146 Atp6v1b2      | NM_007509     | 0.000187919  | 1.40795 | E15.5 * Wnt1 up vs E15.5 * Sox10 |
| 10489985 Atp9a         | NM_015731     | 0.00183919   | 1.40785 | E15.5 * Wnt1 up vs E15.5 * Sox10 |
| 10411332 Hmgcr         | NM_008255     | 0.000720598  | 1.40766 | E15.5 * Wnt1 up vs E15.5 * Sox10 |
| 10569163 Cend1         | NM_021316     | 0.000290303  | 1.40691 | E15.5 * Wnt1 up vs E15.5 * Sox10 |
| 10506296               | ---           | 0.00379142   | 1.40594 | E15.5 * Wnt1 up vs E15.5 * Sox10 |
| 10498952 Gucy1a3       | NM_021896     | 0.00216666   | 1.40457 | E15.5 * Wnt1 up vs E15.5 * Sox10 |
| 10345241 Dst           | NM_134448     | 3.16528e-007 | 1.40344 | E15.5 * Wnt1 up vs E15.5 * Sox10 |
| 10452793 Galnt14       | NM_027864     | 0.000449677  | 1.40333 | E15.5 * Wnt1 up vs E15.5 * Sox10 |
| 10473312 Fam171b       | NM_175514     | 0.00180538   | 1.40299 | E15.5 * Wnt1 up vs E15.5 * Sox10 |
| 10418817 Chat          | NM_009891     | 6.9076e-005  | 1.40222 | E15.5 * Wnt1 up vs E15.5 * Sox10 |
| 10348537 Ramp1         | NM_016894     | 0.000150299  | 1.40208 | E15.5 * Wnt1 up vs E15.5 * Sox10 |
| 10472408 Csrnp3        | NM_153409     | 0.00100386   | 1.40107 | E15.5 * Wnt1 up vs E15.5 * Sox10 |
| 10400057 Arl4a         | NM_001039515  | 1.24126e-005 | 1.40101 | E15.5 * Wnt1 up vs E15.5 * Sox10 |
| 10351111 Dnm3os        | NR_002870     | 0.00357406   | 1.40098 | E15.5 * Wnt1 up vs E15.5 * Sox10 |
| 10542894               | ---           | 0.000648897  | 1.4009  | E15.5 * Wnt1 up vs E15.5 * Sox10 |
| 10559681 D430041B17Rik | NM_172737     | 8.60557e-006 | 1.40046 | E15.5 * Wnt1 up vs E15.5 * Sox10 |
| 10434446 Ece2          | NM_139293     | 0.000104416  | 1.40001 | E15.5 * Wnt1 up vs E15.5 * Sox10 |
| 10521995 3110047P20Rik | NM_177006     | 0.00483533   | 1.3998  | E15.5 * Wnt1 up vs E15.5 * Sox10 |
| 10540880 Syn2          | NM_001111015  | 0.000163418  | 1.39934 | E15.5 * Wnt1 up vs E15.5 * Sox10 |
| 10602428 Wnk3          | ENSMUST000000 | 0.0017439    | 1.39897 | E15.5 * Wnt1 up vs E15.5 * Sox10 |
| 10542401 BC049715      | NM_178776     | 0.00308568   | 1.39862 | E15.5 * Wnt1 up vs E15.5 * Sox10 |
| 10543369 Cadps2        | NM_153163     | 1.12523e-005 | 1.39755 | E15.5 * Wnt1 up vs E15.5 * Sox10 |
| 10564237 ENSMUSG000000 | ENSMUST000000 | 0.00369054   | 1.39741 | E15.5 * Wnt1 up vs E15.5 * Sox10 |
| 10521498 Crmp1         | NM_007765     | 0.00070506   | 1.39677 | E15.5 * Wnt1 up vs E15.5 * Sox10 |
| 10497505 Nlgn1         | NM_138666     | 0.00187792   | 1.39662 | E15.5 * Wnt1 up vs E15.5 * Sox10 |
| 10562204 Fxyd7         | NM_022007     | 1.81647e-005 | 1.39507 | E15.5 * Wnt1 up vs E15.5 * Sox10 |
| 10349184 Cdh7          | NM_172853     | 3.80445e-006 | 1.39297 | E15.5 * Wnt1 up vs E15.5 * Sox10 |
| 10486875 Frmd5         | NM_172673     | 0.000315938  | 1.39064 | E15.5 * Wnt1 up vs E15.5 * Sox10 |
| 10518835 Camta1        | NM_001081557  | 0.0016267    | 1.39048 | E15.5 * Wnt1 up vs E15.5 * Sox10 |
| 10483353 Scn7a         | NM_009135     | 0.00452426   | 1.39035 | E15.5 * Wnt1 up vs E15.5 * Sox10 |
| 10395457 Etv1          | NM_007960     | 0.000715988  | 1.39024 | E15.5 * Wnt1 up vs E15.5 * Sox10 |
| 10584572 Hspa8         | NM_031165     | 2.51324e-006 | 1.39018 | E15.5 * Wnt1 up vs E15.5 * Sox10 |
| 10532542 Sez6l         | NM_019982     | 0.000175264  | 1.38896 | E15.5 * Wnt1 up vs E15.5 * Sox10 |
| 10557535 Sez6l2        | NM_144926     | 0.000661019  | 1.38831 | E15.5 * Wnt1 up vs E15.5 * Sox10 |
| 10496519 Unc5c         | NM_009472     | 1.25653e-005 | 1.38821 | E15.5 * Wnt1 up vs E15.5 * Sox10 |
| 10452734 Alk           | NM_007439     | 0.000186321  | 1.38794 | E15.5 * Wnt1 up vs E15.5 * Sox10 |
| 10584883 Fxyd6         | NM_022004     | 5.13748e-005 | 1.3874  | E15.5 * Wnt1 up vs E15.5 * Sox10 |
| 10415700 Mtmr6         | NM_144843     | 0.00496919   | 1.38604 | E15.5 * Wnt1 up vs E15.5 * Sox10 |

|          |               |              |              |         |                                  |
|----------|---------------|--------------|--------------|---------|----------------------------------|
| 10482336 | Lrp1b         | NM_053011    | 3.29527e-006 | 1.38599 | E15.5 * Wnt1 up vs E15.5 * Sox10 |
| 10362861 | Scml4         | NM_172938    | 2.51658e-006 | 1.38596 | E15.5 * Wnt1 up vs E15.5 * Sox10 |
| 10381006 | Thra          | NM_178060    | 0.00232372   | 1.38584 | E15.5 * Wnt1 up vs E15.5 * Sox10 |
| 10530319 | Atp8a1        | NM_001038999 | 5.47319e-007 | 1.38519 | E15.5 * Wnt1 up vs E15.5 * Sox10 |
| 10385234 | ---           | ---          | 0.000227264  | 1.38512 | E15.5 * Wnt1 up vs E15.5 * Sox10 |
| 10589130 | Celsr3        | NM_080437    | 0.000479294  | 1.38493 | E15.5 * Wnt1 up vs E15.5 * Sox10 |
| 10593671 | Dmxl2         | NM_172771    | 4.13695e-005 | 1.38467 | E15.5 * Wnt1 up vs E15.5 * Sox10 |
| 10554667 | Tmc3          | NM_177695    | 6.86441e-006 | 1.38462 | E15.5 * Wnt1 up vs E15.5 * Sox10 |
| 10408937 | Atxn1         | NM_009124    | 0.00336455   | 1.38422 | E15.5 * Wnt1 up vs E15.5 * Sox10 |
| 10362147 | Taar1         | NM_053205    | 0.000627842  | 1.38371 | E15.5 * Wnt1 up vs E15.5 * Sox10 |
| 10543952 | 9330158H04Rik | ENSMUST00000 | 0.0015345    | 1.38362 | E15.5 * Wnt1 up vs E15.5 * Sox10 |
| 10470834 | Spna2         | NM_001076554 | 3.71477e-005 | 1.3834  | E15.5 * Wnt1 up vs E15.5 * Sox10 |
| 10372421 | Trhde         | NM_146241    | 0.00034887   | 1.38339 | E15.5 * Wnt1 up vs E15.5 * Sox10 |
| 10396278 | Daam1         | NM_026102    | 2.20005e-005 | 1.38273 | E15.5 * Wnt1 up vs E15.5 * Sox10 |
| 10552030 | C630016N16Rik | AK049951     | 0.000772091  | 1.38269 | E15.5 * Wnt1 up vs E15.5 * Sox10 |
| 10571371 | Tusc3         | NM_030254    | 5.28764e-007 | 1.38266 | E15.5 * Wnt1 up vs E15.5 * Sox10 |
| 10345571 | Cnga3         | NM_009918    | 0.000217673  | 1.38263 | E15.5 * Wnt1 up vs E15.5 * Sox10 |
| 10432294 | C430014K11Rik | ENSMUST00000 | 3.82063e-005 | 1.38242 | E15.5 * Wnt1 up vs E15.5 * Sox10 |
| 10543219 | Gpr85         | NM_145066    | 0.000101505  | 1.38207 | E15.5 * Wnt1 up vs E15.5 * Sox10 |
| 10578300 | Mtmr7         | NM_001040699 | 0.000241406  | 1.38152 | E15.5 * Wnt1 up vs E15.5 * Sox10 |
| 10391987 | ---           | ---          | 8.04928e-006 | 1.38134 | E15.5 * Wnt1 up vs E15.5 * Sox10 |
| 10607302 | Gnl3l         | NM_198110    | 1.76626e-006 | 1.38126 | E15.5 * Wnt1 up vs E15.5 * Sox10 |
| 10428443 | Kcnv1         | NM_026200    | 0.00363185   | 1.38092 | E15.5 * Wnt1 up vs E15.5 * Sox10 |
| 10346150 | Tmeff2        | NM_019790    | 3.86594e-005 | 1.3803  | E15.5 * Wnt1 up vs E15.5 * Sox10 |
| 10457686 | Dsc2          | NM_013505    | 4.87418e-005 | 1.37851 | E15.5 * Wnt1 up vs E15.5 * Sox10 |
| 10483299 | Scn1a         | NM_018733    | 1.13445e-006 | 1.37782 | E15.5 * Wnt1 up vs E15.5 * Sox10 |
| 10543802 | Plxna4        | NM_175750    | 0.000363316  | 1.3776  | E15.5 * Wnt1 up vs E15.5 * Sox10 |
| 10512915 | 2810432L12Rik | NM_025944    | 0.00267383   | 1.37722 | E15.5 * Wnt1 up vs E15.5 * Sox10 |
| 10356379 | Ecel1         | NM_021306    | 0.000233901  | 1.37695 | E15.5 * Wnt1 up vs E15.5 * Sox10 |
| 10563921 | ---           | ---          | 4.75874e-007 | 1.37488 | E15.5 * Wnt1 up vs E15.5 * Sox10 |
| 10563925 | ---           | ---          | 4.75874e-007 | 1.37488 | E15.5 * Wnt1 up vs E15.5 * Sox10 |
| 10463911 | Add3          | NM_013758    | 0.000133461  | 1.37474 | E15.5 * Wnt1 up vs E15.5 * Sox10 |
| 10451213 | Rsph9         | NM_029338    | 0.00313641   | 1.37458 | E15.5 * Wnt1 up vs E15.5 * Sox10 |
| 10376998 | A530088H08Rik | EU447173     | 0.00302496   | 1.37452 | E15.5 * Wnt1 up vs E15.5 * Sox10 |
| 10445071 | Zfp57         | NM_001013745 | 1.54145e-005 | 1.37419 | E15.5 * Wnt1 up vs E15.5 * Sox10 |
| 10557033 | Eef2k         | ENSMUST00000 | 0.00105514   | 1.3728  | E15.5 * Wnt1 up vs E15.5 * Sox10 |
| 10592471 | Gramd1b       | NM_172768    | 0.000922467  | 1.37217 | E15.5 * Wnt1 up vs E15.5 * Sox10 |
| 10383564 | Fn3k          | NM_001038699 | 0.00015144   | 1.3719  | E15.5 * Wnt1 up vs E15.5 * Sox10 |
| 10355214 | Idh1          | NM_010497    | 6.31568e-006 | 1.3718  | E15.5 * Wnt1 up vs E15.5 * Sox10 |
| 10566993 | Galnt14       | NM_173739    | 0.00188787   | 1.37173 | E15.5 * Wnt1 up vs E15.5 * Sox10 |
| 10441642 | Brp44l        | NM_018819    | 0.0014318    | 1.37172 | E15.5 * Wnt1 up vs E15.5 * Sox10 |
| 10595953 | Fam62c        | NM_177775    | 4.03396e-005 | 1.37028 | E15.5 * Wnt1 up vs E15.5 * Sox10 |
| 10606835 | Bex2          | NM_009749    | 0.00121419   | 1.37006 | E15.5 * Wnt1 up vs E15.5 * Sox10 |
| 10512315 | Ccl27a        | NM_001048179 | 0.000884082  | 1.36945 | E15.5 * Wnt1 up vs E15.5 * Sox10 |
| 10499045 | Trim2         | NM_030706    | 1.43064e-005 | 1.36872 | E15.5 * Wnt1 up vs E15.5 * Sox10 |
| 10410995 | Rasgrf2       | NM_009027    | 6.86935e-005 | 1.3686  | E15.5 * Wnt1 up vs E15.5 * Sox10 |
| 10599853 | Ldoc1         | NM_001018087 | 0.00497561   | 1.3682  | E15.5 * Wnt1 up vs E15.5 * Sox10 |
| 10585905 | Parp6         | NM_029922    | 4.36215e-005 | 1.36645 | E15.5 * Wnt1 up vs E15.5 * Sox10 |
| 10549171 | 5730419I09Rik | NM_029081    | 0.000115833  | 1.36635 | E15.5 * Wnt1 up vs E15.5 * Sox10 |
| 10539211 | Lrrtm4        | NR_027323    | 0.000246999  | 1.36593 | E15.5 * Wnt1 up vs E15.5 * Sox10 |
| 10549162 | St8sia1       | NM_011374    | 0.00100522   | 1.36566 | E15.5 * Wnt1 up vs E15.5 * Sox10 |
| 10547719 | Clstn3        | NM_153508    | 0.000256387  | 1.36498 | E15.5 * Wnt1 up vs E15.5 * Sox10 |
| 10600419 | Plxna3        | NM_008883    | 0.000783237  | 1.36479 | E15.5 * Wnt1 up vs E15.5 * Sox10 |
| 10525487 | 4932422M17Rik | ENSMUST00000 | 0.00389524   | 1.36474 | E15.5 * Wnt1 up vs E15.5 * Sox10 |
| 10601360 | Atp7a         | NM_001109757 | 5.1199e-005  | 1.36424 | E15.5 * Wnt1 up vs E15.5 * Sox10 |
| 10458843 | Sema6a        | NM_018744    | 0.00013562   | 1.36322 | E15.5 * Wnt1 up vs E15.5 * Sox10 |
| 10384504 | Meis1         | NM_010789    | 0.000107814  | 1.36294 | E15.5 * Wnt1 up vs E15.5 * Sox10 |
| 10568298 | Stx1b         | NM_024414    | 0.00136934   | 1.36223 | E15.5 * Wnt1 up vs E15.5 * Sox10 |
| 10346330 | Plcl1         | NM_001114663 | 0.000401183  | 1.36185 | E15.5 * Wnt1 up vs E15.5 * Sox10 |
| 10587012 | Ccpg1         | NM_001114328 | 8.79061e-005 | 1.36173 | E15.5 * Wnt1 up vs E15.5 * Sox10 |
| 10552245 | Tshz3         | NM_172298    | 9.51641e-005 | 1.36114 | E15.5 * Wnt1 up vs E15.5 * Sox10 |
| 10544829 | Jazf1         | NM_173406    | 6.20182e-005 | 1.3597  | E15.5 * Wnt1 up vs E15.5 * Sox10 |
| 10457895 | Brunol4       | NM_001146292 | 0.000847654  | 1.35962 | E15.5 * Wnt1 up vs E15.5 * Sox10 |
| 10387194 | Odf4          | NM_145746    | 0.000349779  | 1.35959 | E15.5 * Wnt1 up vs E15.5 * Sox10 |
| 10495163 | Tmem77        | NM_026013    | 0.0016496    | 1.35865 | E15.5 * Wnt1 up vs E15.5 * Sox10 |
| 10349876 | Plekha6       | NM_182930    | 0.000272617  | 1.35834 | E15.5 * Wnt1 up vs E15.5 * Sox10 |

|                        |              |              |         |                                  |
|------------------------|--------------|--------------|---------|----------------------------------|
| 10511580 Ppm2c         | NM_001098230 | 5.06031e-005 | 1.35823 | E15.5 * Wnt1 up vs E15.5 * Sox10 |
| 10601701 Tmem35        | NM_026239    | 0.00121634   | 1.3576  | E15.5 * Wnt1 up vs E15.5 * Sox10 |
| 10455118 Pcdhb18       | NM_053143    | 0.0025162    | 1.35619 | E15.5 * Wnt1 up vs E15.5 * Sox10 |
| 10369210 Serinc1       | NM_019760    | 8.71072e-006 | 1.35593 | E15.5 * Wnt1 up vs E15.5 * Sox10 |
| 10569972 Lass4         | NM_026058    | 0.00372      | 1.35592 | E15.5 * Wnt1 up vs E15.5 * Sox10 |
| 10565102 Ap3b2         | NM_021492    | 0.000739576  | 1.35511 | E15.5 * Wnt1 up vs E15.5 * Sox10 |
| 10361358 Rgs17         | NM_019958    | 0.000223812  | 1.3546  | E15.5 * Wnt1 up vs E15.5 * Sox10 |
| 10376163 Rapgef6       | NM_175258    | 9.9018e-007  | 1.35406 | E15.5 * Wnt1 up vs E15.5 * Sox10 |
| 10440314 Cadm2         | NM_178721    | 0.000359244  | 1.35366 | E15.5 * Wnt1 up vs E15.5 * Sox10 |
| 10601771 Armcx1        | NM_030066    | 0.000191369  | 1.35328 | E15.5 * Wnt1 up vs E15.5 * Sox10 |
| 10456756 Zbtb7c        | NM_145356    | 0.000221368  | 1.35299 | E15.5 * Wnt1 up vs E15.5 * Sox10 |
| 10360344 Darc          | NM_010045    | 0.000669701  | 1.35242 | E15.5 * Wnt1 up vs E15.5 * Sox10 |
| 10456248 Onecut2       | NM_194268    | 0.00105621   | 1.35187 | E15.5 * Wnt1 up vs E15.5 * Sox10 |
| 10449258 Arhgdig       | NM_008113    | 0.00240586   | 1.35115 | E15.5 * Wnt1 up vs E15.5 * Sox10 |
| 10497689 Gnb4          | NM_013531    | 8.53966e-005 | 1.35101 | E15.5 * Wnt1 up vs E15.5 * Sox10 |
| 10422075 Mycbp2        | NM_207215    | 1.85373e-006 | 1.35078 | E15.5 * Wnt1 up vs E15.5 * Sox10 |
| 10362363 6330407J23Rik | NM_026138    | 0.00105775   | 1.35013 | E15.5 * Wnt1 up vs E15.5 * Sox10 |
| 10602896 Gpr64         | NM_178712    | 0.000185237  | 1.34841 | E15.5 * Wnt1 up vs E15.5 * Sox10 |
| 10480490               | ---          | 0.00312051   | 1.34779 | E15.5 * Wnt1 up vs E15.5 * Sox10 |
| 10593799 Scaper        | NM_001081341 | 4.24195e-005 | 1.3471  | E15.5 * Wnt1 up vs E15.5 * Sox10 |
| 10361191 Syt14         | NM_181546    | 0.000236433  | 1.34653 | E15.5 * Wnt1 up vs E15.5 * Sox10 |
| 10350697 Nmnat2        | NM_175460    | 0.00481033   | 1.34595 | E15.5 * Wnt1 up vs E15.5 * Sox10 |
| 10434436 Vwa5b2        | NM_001144953 | 0.00224818   | 1.34579 | E15.5 * Wnt1 up vs E15.5 * Sox10 |
| 10384838 C230094A16Rik | NM_146016    | 0.00183486   | 1.34506 | E15.5 * Wnt1 up vs E15.5 * Sox10 |
| 10538373 Prr15         | NM_030024    | 0.00303267   | 1.34491 | E15.5 * Wnt1 up vs E15.5 * Sox10 |
| 10427369 Pde1b         | NM_008800    | 8.64718e-005 | 1.34437 | E15.5 * Wnt1 up vs E15.5 * Sox10 |
| 10492516 Iqej          | NM_177585    | 0.000246682  | 1.34315 | E15.5 * Wnt1 up vs E15.5 * Sox10 |
| 10503593 6230409E13Rik | NM_175234    | 0.000166009  | 1.34302 | E15.5 * Wnt1 up vs E15.5 * Sox10 |
| 10367775 Stxbp5        | NM_001081344 | 0.000555529  | 1.34285 | E15.5 * Wnt1 up vs E15.5 * Sox10 |
| 10579554 Unc13a        | NM_001029873 | 0.000589701  | 1.34238 | E15.5 * Wnt1 up vs E15.5 * Sox10 |
| 10352439 Susd4         | NM_144796    | 0.000434329  | 1.34192 | E15.5 * Wnt1 up vs E15.5 * Sox10 |
| 10574384 Ndr4          | NM_145602    | 0.000462113  | 1.34179 | E15.5 * Wnt1 up vs E15.5 * Sox10 |
| 10361790 Fuca2         | NM_025799    | 0.00152557   | 1.3413  | E15.5 * Wnt1 up vs E15.5 * Sox10 |
| 10587023 Rab27a        | NM_023635    | 1.94081e-005 | 1.34036 | E15.5 * Wnt1 up vs E15.5 * Sox10 |
| 10596583 Dock3         | NM_153413    | 0.000727478  | 1.33979 | E15.5 * Wnt1 up vs E15.5 * Sox10 |
| 10510422 Casz1         | NM_001159344 | 4.08686e-005 | 1.33943 | E15.5 * Wnt1 up vs E15.5 * Sox10 |
| 10472418 Scn9a         | ENSMUST00000 | 0.000714357  | 1.33927 | E15.5 * Wnt1 up vs E15.5 * Sox10 |
| 10416340 Gfra2         | NM_008115    | 0.00129003   | 1.3384  | E15.5 * Wnt1 up vs E15.5 * Sox10 |
| 10362115 1110021L09Rik | NM_183116    | 0.000234037  | 1.33828 | E15.5 * Wnt1 up vs E15.5 * Sox10 |
| 10521759 Slit2         | NM_178804    | 0.000405543  | 1.33716 | E15.5 * Wnt1 up vs E15.5 * Sox10 |
| 10534021 Rimb2         | NM_001081388 | 1.45989e-006 | 1.33657 | E15.5 * Wnt1 up vs E15.5 * Sox10 |
| 10442219 Zfp52         | NM_144515    | 0.00314423   | 1.33641 | E15.5 * Wnt1 up vs E15.5 * Sox10 |
| 10607888 Frmpd4        | NM_001033330 | 0.00147406   | 1.33573 | E15.5 * Wnt1 up vs E15.5 * Sox10 |
| 10416541 Enox1         | NM_172813    | 3.6706e-005  | 1.33556 | E15.5 * Wnt1 up vs E15.5 * Sox10 |
| 10370242 Pcbp3         | NM_021568    | 0.000228215  | 1.33555 | E15.5 * Wnt1 up vs E15.5 * Sox10 |
| 10454254 Dtna          | NM_207650    | 0.000121626  | 1.3355  | E15.5 * Wnt1 up vs E15.5 * Sox10 |
| 10593756 Chna3         | NM_145129    | 0.000512476  | 1.33525 | E15.5 * Wnt1 up vs E15.5 * Sox10 |
| 10541049 March8        | NM_027920    | 0.000503694  | 1.33471 | E15.5 * Wnt1 up vs E15.5 * Sox10 |
| 10583847 Bbs9          | NM_178415    | 0.000189802  | 1.33441 | E15.5 * Wnt1 up vs E15.5 * Sox10 |
| 10416112 Pnma2         | NM_175498    | 0.00268259   | 1.3342  | E15.5 * Wnt1 up vs E15.5 * Sox10 |
| 10466248 Stx3          | NM_001025307 | 0.000408819  | 1.33397 | E15.5 * Wnt1 up vs E15.5 * Sox10 |
| 10413771 Capn7         | NM_009796    | 0.000258259  | 1.33364 | E15.5 * Wnt1 up vs E15.5 * Sox10 |
| 10502224 Sgms2         | NM_028943    | 0.00362283   | 1.33335 | E15.5 * Wnt1 up vs E15.5 * Sox10 |
| 10515894 1700041C02Rik | NM_029286    | 0.000659025  | 1.33251 | E15.5 * Wnt1 up vs E15.5 * Sox10 |
| 10563943               | ---          | 0.00163972   | 1.33152 | E15.5 * Wnt1 up vs E15.5 * Sox10 |
| 10581266 Tppp3         | NM_026481    | 0.00114869   | 1.33127 | E15.5 * Wnt1 up vs E15.5 * Sox10 |
| 10427303 Hoxc4         | NM_013553    | 0.00285636   | 1.32959 | E15.5 * Wnt1 up vs E15.5 * Sox10 |
| 10464030 Adra2a        | NM_007417    | 0.00155415   | 1.32958 | E15.5 * Wnt1 up vs E15.5 * Sox10 |
| 10538408 2410066E13Rik | BC042507     | 0.000360872  | 1.3294  | E15.5 * Wnt1 up vs E15.5 * Sox10 |
| 10506360 Sgip1         | NM_144906    | 3.8546e-005  | 1.3289  | E15.5 * Wnt1 up vs E15.5 * Sox10 |
| 10590306 Entpd3        | NM_178676    | 0.00171959   | 1.32882 | E15.5 * Wnt1 up vs E15.5 * Sox10 |
| 10392560 Abca9         | NM_147220    | 0.000497806  | 1.32841 | E15.5 * Wnt1 up vs E15.5 * Sox10 |
| 10565089 Cpeb1         | NM_007755    | 0.000399683  | 1.32823 | E15.5 * Wnt1 up vs E15.5 * Sox10 |
| 10481711 Stxbp1        | NM_001113569 | 0.00181523   | 1.32779 | E15.5 * Wnt1 up vs E15.5 * Sox10 |
| 10602009 Rnf128        | NM_023270    | 0.000192825  | 1.32765 | E15.5 * Wnt1 up vs E15.5 * Sox10 |
| 10458663 Dpysl3        | NM_009468    | 0.000482723  | 1.32764 | E15.5 * Wnt1 up vs E15.5 * Sox10 |

|                       |              |              |         |                                  |
|-----------------------|--------------|--------------|---------|----------------------------------|
| 10576495 Trim67       | BC094596     | 0.000272938  | 1.32759 | E15.5 * Wnt1 up vs E15.5 * Sox10 |
| 10564624 St8sia2      | NM_009181    | 0.00192258   | 1.32723 | E15.5 * Wnt1 up vs E15.5 * Sox10 |
| 10428534 Trps1        | NM_032000    | 0.00147331   | 1.32717 | E15.5 * Wnt1 up vs E15.5 * Sox10 |
| 10598996 EG331392     | NM_198633    | 0.0042986    | 1.32626 | E15.5 * Wnt1 up vs E15.5 * Sox10 |
| 10544089 Zc3hav1      | NM_028421    | 0.000273786  | 1.32556 | E15.5 * Wnt1 up vs E15.5 * Sox10 |
| 10504234 Unc13b       | NM_001081413 | 0.000115176  | 1.32519 | E15.5 * Wnt1 up vs E15.5 * Sox10 |
| 10498210 Nbea         | NM_030595    | 2.86743e-006 | 1.32464 | E15.5 * Wnt1 up vs E15.5 * Sox10 |
| 10351140 Kifap3       | NM_010629    | 1.26807e-005 | 1.32462 | E15.5 * Wnt1 up vs E15.5 * Sox10 |
| 10578324 Mtus1        | NM_001005863 | 6.14178e-005 | 1.32317 | E15.5 * Wnt1 up vs E15.5 * Sox10 |
| 10608288              | ---          | 0.000325177  | 1.32296 | E15.5 * Wnt1 up vs E15.5 * Sox10 |
| 10608300              | ---          | 0.000325177  | 1.32296 | E15.5 * Wnt1 up vs E15.5 * Sox10 |
| 10561369 BC089491     | NM_175033    | 0.00151946   | 1.32283 | E15.5 * Wnt1 up vs E15.5 * Sox10 |
| 10454235 Asxl3        | ENSMUST00000 | 0.000219261  | 1.3228  | E15.5 * Wnt1 up vs E15.5 * Sox10 |
| 10463875 Sorcs3       | NM_025696    | 0.00243426   | 1.32203 | E15.5 * Wnt1 up vs E15.5 * Sox10 |
| 10455019 Pcdha10      | NM_009961    | 3.90737e-005 | 1.32155 | E15.5 * Wnt1 up vs E15.5 * Sox10 |
| 10598626 Tspan7       | NM_019634    | 0.000791265  | 1.32083 | E15.5 * Wnt1 up vs E15.5 * Sox10 |
| 10485828 Slc12a6      | NM_133648    | 0.000414915  | 1.31995 | E15.5 * Wnt1 up vs E15.5 * Sox10 |
| 10375002 Cpeb4        | NM_026252    | 2.80331e-006 | 1.31892 | E15.5 * Wnt1 up vs E15.5 * Sox10 |
| 10458052 Epb4.114a    | NM_013512    | 0.000552729  | 1.3186  | E15.5 * Wnt1 up vs E15.5 * Sox10 |
| 10527233 Cyth3        | NM_011182    | 4.32345e-005 | 1.31786 | E15.5 * Wnt1 up vs E15.5 * Sox10 |
| 10476633 Pcsk2        | NM_008792    | 0.00318319   | 1.31773 | E15.5 * Wnt1 up vs E15.5 * Sox10 |
| 10392388 Prkca        | NM_011101    | 0.000338269  | 1.31748 | E15.5 * Wnt1 up vs E15.5 * Sox10 |
| 10428020 March6       | NM_172606    | 7.43531e-005 | 1.31692 | E15.5 * Wnt1 up vs E15.5 * Sox10 |
| 10541288 ENSMUSG00000 | ENSMUST00000 | 0.0012205    | 1.31637 | E15.5 * Wnt1 up vs E15.5 * Sox10 |
| 10547521 Atp6v1e1     | NM_007510    | 0.00337493   | 1.31634 | E15.5 * Wnt1 up vs E15.5 * Sox10 |
| 10600082 Nsdhl        | NM_010941    | 0.0037106    | 1.31621 | E15.5 * Wnt1 up vs E15.5 * Sox10 |
| 10600390 Gdi1         | NM_010273    | 0.000415477  | 1.31575 | E15.5 * Wnt1 up vs E15.5 * Sox10 |
| 10365830              | ---          | 5.89325e-005 | 1.31472 | E15.5 * Wnt1 up vs E15.5 * Sox10 |
| 10438103 Ccdc116      | NM_029779    | 5.28028e-005 | 1.31378 | E15.5 * Wnt1 up vs E15.5 * Sox10 |
| 10604038 Sfrs17b      | NM_001081956 | 0.00342826   | 1.31369 | E15.5 * Wnt1 up vs E15.5 * Sox10 |
| 10383684 Limk2        | NM_010718    | 1.08657e-005 | 1.31335 | E15.5 * Wnt1 up vs E15.5 * Sox10 |
| 10347018 Pth2r        | NM_139270    | 0.00194784   | 1.313   | E15.5 * Wnt1 up vs E15.5 * Sox10 |
| 10515095 Elavl4       | NM_010488    | 0.00276012   | 1.31283 | E15.5 * Wnt1 up vs E15.5 * Sox10 |
| 10458913 Cep120       | NM_178686    | 0.000183695  | 1.31264 | E15.5 * Wnt1 up vs E15.5 * Sox10 |
| 10422059 Kctd12       | NM_177715    | 0.00239248   | 1.31254 | E15.5 * Wnt1 up vs E15.5 * Sox10 |
| 10454655 Apc          | NM_007462    | 6.70899e-005 | 1.31196 | E15.5 * Wnt1 up vs E15.5 * Sox10 |
| 10604961 Gabra3       | NM_008067    | 0.00234268   | 1.31175 | E15.5 * Wnt1 up vs E15.5 * Sox10 |
| 10403604 Lyst         | NM_010748    | 0.000260379  | 1.31164 | E15.5 * Wnt1 up vs E15.5 * Sox10 |
| 10565634 Myo7a        | NM_008663    | 4.00895e-005 | 1.31141 | E15.5 * Wnt1 up vs E15.5 * Sox10 |
| 10381939 Tanc2        | NM_181071    | 0.000502001  | 1.31111 | E15.5 * Wnt1 up vs E15.5 * Sox10 |
| 10512847 Alg2         | NM_019998    | 0.000809474  | 1.31102 | E15.5 * Wnt1 up vs E15.5 * Sox10 |
| 10409616 Spock1       | NM_009262    | 0.000528376  | 1.31026 | E15.5 * Wnt1 up vs E15.5 * Sox10 |
| 10379153 Aldoc        | NM_009657    | 0.00431312   | 1.30978 | E15.5 * Wnt1 up vs E15.5 * Sox10 |
| 10576062 Jph3         | NM_020605    | 0.00152292   | 1.30975 | E15.5 * Wnt1 up vs E15.5 * Sox10 |
| 10465424 Nrxn2        | NM_020253    | 0.00295928   | 1.30968 | E15.5 * Wnt1 up vs E15.5 * Sox10 |
| 10597309 Stac         | NM_016853    | 0.00370083   | 1.30943 | E15.5 * Wnt1 up vs E15.5 * Sox10 |
| 10606026 Zmym3        | NM_019831    | 0.000784513  | 1.3094  | E15.5 * Wnt1 up vs E15.5 * Sox10 |
| 10555009              | ---          | 0.000277616  | 1.30934 | E15.5 * Wnt1 up vs E15.5 * Sox10 |
| 10408610 Tubb2a       | NM_009450    | 0.000151829  | 1.30916 | E15.5 * Wnt1 up vs E15.5 * Sox10 |
| 10480676 Grin1        | NM_008169    | 1.23974e-005 | 1.30866 | E15.5 * Wnt1 up vs E15.5 * Sox10 |
| 10426479 Ano6         | NM_175344    | 0.000324749  | 1.30861 | E15.5 * Wnt1 up vs E15.5 * Sox10 |
| 10437210 Bace2        | NM_019517    | 0.000169997  | 1.30826 | E15.5 * Wnt1 up vs E15.5 * Sox10 |
| 10456206 Wdr7         | NM_001014981 | 3.67655e-005 | 1.30808 | E15.5 * Wnt1 up vs E15.5 * Sox10 |
| 10543120 Ica1         | NM_010492    | 0.00343184   | 1.30765 | E15.5 * Wnt1 up vs E15.5 * Sox10 |
| 10426924 Slc4a8       | NM_021530    | 0.00123394   | 1.30757 | E15.5 * Wnt1 up vs E15.5 * Sox10 |
| 10539472 Nagk         | NM_019542    | 0.0022166    | 1.30699 | E15.5 * Wnt1 up vs E15.5 * Sox10 |
| 10547322 Cacna1c      | NM_001159533 | 2.83576e-005 | 1.30685 | E15.5 * Wnt1 up vs E15.5 * Sox10 |
| 10500469 Pde4dip      | NM_001039376 | 3.60722e-005 | 1.30662 | E15.5 * Wnt1 up vs E15.5 * Sox10 |
| 10499483 Fdps         | NM_134469    | 0.000202442  | 1.30653 | E15.5 * Wnt1 up vs E15.5 * Sox10 |
| 10599174 Il13ra1      | NM_133990    | 0.0010499    | 1.30631 | E15.5 * Wnt1 up vs E15.5 * Sox10 |
| 10364194 Lss          | NM_146006    | 0.00121019   | 1.30596 | E15.5 * Wnt1 up vs E15.5 * Sox10 |
| 10533869 Ccdc92       | NM_144819    | 0.0046768    | 1.30593 | E15.5 * Wnt1 up vs E15.5 * Sox10 |
| 10495993 Elovl6       | NM_130450    | 0.00265587   | 1.30567 | E15.5 * Wnt1 up vs E15.5 * Sox10 |
| 10593384 Dixdc1       | NM_178118    | 3.54511e-005 | 1.30528 | E15.5 * Wnt1 up vs E15.5 * Sox10 |
| 10441073 Kcnj6        | NM_010606    | 0.000492086  | 1.30511 | E15.5 * Wnt1 up vs E15.5 * Sox10 |
| 10518585 Kif1b        | NM_207682    | 3.67343e-005 | 1.30431 | E15.5 * Wnt1 up vs E15.5 * Sox10 |

|                        |               |              |         |                                  |
|------------------------|---------------|--------------|---------|----------------------------------|
| 10345350               | ---           | 0.000852001  | 1.30375 | E15.5 * Wnt1 up vs E15.5 * Sox10 |
| 10591092 Fat3          | NM_001080814  | 0.00108982   | 1.3027  | E15.5 * Wnt1 up vs E15.5 * Sox10 |
| 10355141 Klf7          | NM_033563     | 3.6469e-005  | 1.30265 | E15.5 * Wnt1 up vs E15.5 * Sox10 |
| 10418879 Mapk8         | NM_016700     | 0.000159941  | 1.30235 | E15.5 * Wnt1 up vs E15.5 * Sox10 |
| 10554900 Dlg2          | NM_011807     | 0.00148921   | 1.30193 | E15.5 * Wnt1 up vs E15.5 * Sox10 |
| 10519815 Cacna2d1      | NM_001110843  | 0.00400977   | 1.30127 | E15.5 * Wnt1 up vs E15.5 * Sox10 |
| 10477637 Map1lc3a      | NM_025735     | 0.003756     | 1.30125 | E15.5 * Wnt1 up vs E15.5 * Sox10 |
| 10375572 Olfr1382      | NM_001011790  | 0.00313031   | 1.3008  | E15.5 * Wnt1 up vs E15.5 * Sox10 |
| 10483381 Stk39         | NM_016866     | 2.14584e-005 | 1.30035 | E15.5 * Wnt1 up vs E15.5 * Sox10 |
| 10399854 Slc26a4       | NM_011867     | 0.00181331   | 1.3003  | E15.5 * Wnt1 up vs E15.5 * Sox10 |
| 10396454 Syt16         | NM_172804     | 9.26347e-005 | 1.29969 | E15.5 * Wnt1 up vs E15.5 * Sox10 |
| 10347036 Mtap2         | NM_001039934  | 4.46152e-005 | 1.29946 | E15.5 * Wnt1 up vs E15.5 * Sox10 |
| 10526792 0910001L09Rik | NM_001081108  | 2.96375e-005 | 1.29925 | E15.5 * Wnt1 up vs E15.5 * Sox10 |
| 10539669 Add2          | NM_013458     | 3.52106e-005 | 1.29882 | E15.5 * Wnt1 up vs E15.5 * Sox10 |
| 10377534 A030009H04Rik | AB041807      | 0.000402177  | 1.29881 | E15.5 * Wnt1 up vs E15.5 * Sox10 |
| 10440158 Olfr191       | NM_001011807  | 0.00300967   | 1.29819 | E15.5 * Wnt1 up vs E15.5 * Sox10 |
| 10549420 Tmtc1         | NM_198967     | 0.00187443   | 1.29796 | E15.5 * Wnt1 up vs E15.5 * Sox10 |
| 10468980 Fam107b       | NM_025626     | 0.00116307   | 1.29788 | E15.5 * Wnt1 up vs E15.5 * Sox10 |
| 10469622 Gpr158        | NM_001004761  | 0.00159943   | 1.29777 | E15.5 * Wnt1 up vs E15.5 * Sox10 |
| 10377431 Vamp2         | NM_009497     | 0.000795642  | 1.29744 | E15.5 * Wnt1 up vs E15.5 * Sox10 |
| 10571384 Epha2         | ENSMUST000001 | 0.00365991   | 1.2974  | E15.5 * Wnt1 up vs E15.5 * Sox10 |
| 10372385 Zdhhc17       | NM_172554     | 0.000422992  | 1.29698 | E15.5 * Wnt1 up vs E15.5 * Sox10 |
| 10444521 Zbtb12        | NM_198886     | 0.000996926  | 1.29667 | E15.5 * Wnt1 up vs E15.5 * Sox10 |
| 10551410 Zfp60         | NM_009560     | 0.00265927   | 1.29624 | E15.5 * Wnt1 up vs E15.5 * Sox10 |
| 10487748 4930402H24Rik | BC052447      | 9.17729e-005 | 1.29549 | E15.5 * Wnt1 up vs E15.5 * Sox10 |
| 10351971 Fmn2          | NM_019445     | 0.00213525   | 1.29515 | E15.5 * Wnt1 up vs E15.5 * Sox10 |
| 10500114 Mlt11         | NM_019914     | 0.000122556  | 1.29452 | E15.5 * Wnt1 up vs E15.5 * Sox10 |
| 10366825 Agap2         | NM_001033263  | 0.00238308   | 1.29387 | E15.5 * Wnt1 up vs E15.5 * Sox10 |
| 10367634 Akap12        | NM_031185     | 4.97919e-005 | 1.29381 | E15.5 * Wnt1 up vs E15.5 * Sox10 |
| 10395466 Dock4         | NM_172803     | 0.000281686  | 1.29338 | E15.5 * Wnt1 up vs E15.5 * Sox10 |
| 10458046 D0H4S114      | NM_053078     | 5.44497e-006 | 1.2926  | E15.5 * Wnt1 up vs E15.5 * Sox10 |
| 10375216 Pank3         | NM_145962     | 0.001052     | 1.29244 | E15.5 * Wnt1 up vs E15.5 * Sox10 |
| 10366293 Csrp2         | NM_007792     | 0.00192446   | 1.29227 | E15.5 * Wnt1 up vs E15.5 * Sox10 |
| 10599719 Slc9a6        | NM_172780     | 0.000838139  | 1.2922  | E15.5 * Wnt1 up vs E15.5 * Sox10 |
| 10396862 Strm          | AF031663      | 0.000472097  | 1.29201 | E15.5 * Wnt1 up vs E15.5 * Sox10 |
| 10412667 Ptprg         | NM_008981     | 0.000835221  | 1.29144 | E15.5 * Wnt1 up vs E15.5 * Sox10 |
| 10532150 Fam69a        | NM_026062     | 0.00262396   | 1.29089 | E15.5 * Wnt1 up vs E15.5 * Sox10 |
| 10368484 ENSMUSG000001 | ENSMUST000001 | 0.000852085  | 1.29086 | E15.5 * Wnt1 up vs E15.5 * Sox10 |
| 10498309 Pfn2          | NM_019410     | 0.00407073   | 1.28982 | E15.5 * Wnt1 up vs E15.5 * Sox10 |
| 10550638 Rtn2          | NM_013648     | 7.419e-005   | 1.28942 | E15.5 * Wnt1 up vs E15.5 * Sox10 |
| 10386388 Snap47        | NM_144521     | 0.00200194   | 1.289   | E15.5 * Wnt1 up vs E15.5 * Sox10 |
| 10547410 Erc1          | NM_053204     | 8.96776e-005 | 1.28888 | E15.5 * Wnt1 up vs E15.5 * Sox10 |
| 10550274 Meis3         | NM_008627     | 0.000269054  | 1.28831 | E15.5 * Wnt1 up vs E15.5 * Sox10 |
| 10368918 Sobp          | NM_175407     | 0.00049748   | 1.28802 | E15.5 * Wnt1 up vs E15.5 * Sox10 |
| 10372383 Zdhhc17       | BC051527      | 0.0039123    | 1.28788 | E15.5 * Wnt1 up vs E15.5 * Sox10 |
| 10453373 Prepl         | NM_145984     | 0.00246534   | 1.28741 | E15.5 * Wnt1 up vs E15.5 * Sox10 |
| 10537851 Cntnap2       | NM_001004357  | 0.000511975  | 1.28721 | E15.5 * Wnt1 up vs E15.5 * Sox10 |
| 10591643 Rab3d         | NM_031874     | 0.000195047  | 1.28674 | E15.5 * Wnt1 up vs E15.5 * Sox10 |
| 10560139 B430211C08Rik | NM_001039146  | 0.000139911  | 1.28619 | E15.5 * Wnt1 up vs E15.5 * Sox10 |
| 10491629 4932438A13Rik | NM_172679     | 0.000994658  | 1.28616 | E15.5 * Wnt1 up vs E15.5 * Sox10 |
| 10402020 Eml5          | NM_001081191  | 0.00071228   | 1.28597 | E15.5 * Wnt1 up vs E15.5 * Sox10 |
| 10421418 Epb4.9        | NM_013514     | 0.000170513  | 1.28581 | E15.5 * Wnt1 up vs E15.5 * Sox10 |
| 10552508 Klf7          | NM_011872     | 0.000203128  | 1.28577 | E15.5 * Wnt1 up vs E15.5 * Sox10 |
| 10441422 Zdhhc14       | NM_146073     | 0.00194935   | 1.28576 | E15.5 * Wnt1 up vs E15.5 * Sox10 |
| 10549536 Amn1          | NM_001113424  | 0.00222066   | 1.28548 | E15.5 * Wnt1 up vs E15.5 * Sox10 |
| 10599435 Oclr          | NM_177215     | 0.000105881  | 1.28507 | E15.5 * Wnt1 up vs E15.5 * Sox10 |
| 10357946 Ppp1r12b      | NM_001081307  | 0.00337166   | 1.28505 | E15.5 * Wnt1 up vs E15.5 * Sox10 |
| 10388042 6330403K07Rik | NM_134022     | 8.47256e-005 | 1.2849  | E15.5 * Wnt1 up vs E15.5 * Sox10 |
| 10361509 Syne1         | NM_001079686  | 0.000291402  | 1.28489 | E15.5 * Wnt1 up vs E15.5 * Sox10 |
| 10527982 A330021E22Rik | NM_172447     | 0.00113431   | 1.28471 | E15.5 * Wnt1 up vs E15.5 * Sox10 |
| 10379013 Flot2         | NM_008028     | 0.00243647   | 1.28428 | E15.5 * Wnt1 up vs E15.5 * Sox10 |
| 10532578 Myo18b        | BC145218      | 0.00115348   | 1.28417 | E15.5 * Wnt1 up vs E15.5 * Sox10 |
| 10372005 Vezt          | NM_172538     | 0.00387869   | 1.28362 | E15.5 * Wnt1 up vs E15.5 * Sox10 |
| 10607486 Ptchd1        | NM_001093750  | 0.000111916  | 1.28332 | E15.5 * Wnt1 up vs E15.5 * Sox10 |
| 10597323 Arpp21        | NM_033264     | 0.000186935  | 1.28297 | E15.5 * Wnt1 up vs E15.5 * Sox10 |
| 10421709 EG629678      | NM_001037935  | 0.00343471   | 1.28243 | E15.5 * Wnt1 up vs E15.5 * Sox10 |

|          |               |              |              |         |                                  |
|----------|---------------|--------------|--------------|---------|----------------------------------|
| 10521481 | Jakmip1       | NM_178394    | 0.00230242   | 1.2822  | E15.5 * Wnt1 up vs E15.5 * Sox10 |
| 10361381 | Syne1         | NM_001079686 | 3.66748e-005 | 1.2819  | E15.5 * Wnt1 up vs E15.5 * Sox10 |
| 10451039 | Slc25a27      | NM_028711    | 0.00150723   | 1.28187 | E15.5 * Wnt1 up vs E15.5 * Sox10 |
| 10377725 | Dlg4          | NM_007864    | 0.00340628   | 1.28186 | E15.5 * Wnt1 up vs E15.5 * Sox10 |
| 10472764 | Dync1i2       | NM_010064    | 2.91895e-005 | 1.28152 | E15.5 * Wnt1 up vs E15.5 * Sox10 |
| 10496182 | Cxxc4         | NM_001004367 | 0.00119789   | 1.28126 | E15.5 * Wnt1 up vs E15.5 * Sox10 |
| 10477536 | 5430413K10Rik | BC083121     | 0.00104998   | 1.28097 | E15.5 * Wnt1 up vs E15.5 * Sox10 |
| 10527920 | Cyp51         | NM_020010    | 0.00181451   | 1.28027 | E15.5 * Wnt1 up vs E15.5 * Sox10 |
| 10484941 | Madd          | NM_145527    | 2.81954e-005 | 1.27969 | E15.5 * Wnt1 up vs E15.5 * Sox10 |
| 10529797 | ---           | ---          | 0.00283684   | 1.27966 | E15.5 * Wnt1 up vs E15.5 * Sox10 |
| 10491363 | Mfn1          | NM_024200    | 1.45223e-005 | 1.27961 | E15.5 * Wnt1 up vs E15.5 * Sox10 |
| 10459671 | Dcc           | NM_007831    | 0.000481514  | 1.27949 | E15.5 * Wnt1 up vs E15.5 * Sox10 |
| 10455098 | Pcdhb14       | NM_053139    | 0.00097538   | 1.27943 | E15.5 * Wnt1 up vs E15.5 * Sox10 |
| 10459262 | Ablim3        | NM_198649    | 0.00372626   | 1.27927 | E15.5 * Wnt1 up vs E15.5 * Sox10 |
| 10526261 | Stx1a         | NM_016801    | 0.000967932  | 1.27899 | E15.5 * Wnt1 up vs E15.5 * Sox10 |
| 10443786 | Pde9a         | NM_008804    | 0.000912161  | 1.27844 | E15.5 * Wnt1 up vs E15.5 * Sox10 |
| 10447490 | Pja2          | NM_001025309 | 1.52034e-005 | 1.27814 | E15.5 * Wnt1 up vs E15.5 * Sox10 |
| 10491564 | 4932438A13Rik | NM_172679    | 0.00217678   | 1.27777 | E15.5 * Wnt1 up vs E15.5 * Sox10 |
| 10552252 | 1600014C10Rik | NM_001085385 | 1.3745e-005  | 1.27727 | E15.5 * Wnt1 up vs E15.5 * Sox10 |
| 10425726 | 03-Sep        | NM_011889    | 0.000158214  | 1.27676 | E15.5 * Wnt1 up vs E15.5 * Sox10 |
| 10496338 | Ppp3ca        | NM_008913    | 9.69618e-005 | 1.27625 | E15.5 * Wnt1 up vs E15.5 * Sox10 |
| 10594969 | Unc13c        | NM_001081153 | 0.000199949  | 1.2761  | E15.5 * Wnt1 up vs E15.5 * Sox10 |
| 10361186 | Sertad4       | NM_198247    | 0.000434612  | 1.27595 | E15.5 * Wnt1 up vs E15.5 * Sox10 |
| 10475027 | Tyro3         | NM_019392    | 3.48342e-005 | 1.27541 | E15.5 * Wnt1 up vs E15.5 * Sox10 |
| 10509238 | Htr1d         | NM_008309    | 0.00196761   | 1.2749  | E15.5 * Wnt1 up vs E15.5 * Sox10 |
| 10538658 | Herc3         | NM_028705    | 0.00018057   | 1.27488 | E15.5 * Wnt1 up vs E15.5 * Sox10 |
| 10524621 | Oasl2         | NM_011854    | 0.000848692  | 1.27415 | E15.5 * Wnt1 up vs E15.5 * Sox10 |
| 10395227 | Cog5          | ENSMUST00000 | 0.00341833   | 1.27388 | E15.5 * Wnt1 up vs E15.5 * Sox10 |
| 10395142 | Sh3yl1        | NM_013709    | 0.00077829   | 1.27373 | E15.5 * Wnt1 up vs E15.5 * Sox10 |
| 10591517 | Cdkn2d        | NM_009878    | 0.000432702  | 1.27372 | E15.5 * Wnt1 up vs E15.5 * Sox10 |
| 10439239 | Dirc2         | NM_153550    | 0.0032999    | 1.27343 | E15.5 * Wnt1 up vs E15.5 * Sox10 |
| 10440340 | ---           | ---          | 0.00478704   | 1.27241 | E15.5 * Wnt1 up vs E15.5 * Sox10 |
| 10379654 | Ap2b1         | NM_001035854 | 1.72022e-005 | 1.27228 | E15.5 * Wnt1 up vs E15.5 * Sox10 |
| 10564037 | ---           | ---          | 0.000387449  | 1.27184 | E15.5 * Wnt1 up vs E15.5 * Sox10 |
| 10523021 | Slc4a4        | NM_018760    | 0.00485765   | 1.27153 | E15.5 * Wnt1 up vs E15.5 * Sox10 |
| 10572485 | Rab3a         | NM_009001    | 0.00091087   | 1.27044 | E15.5 * Wnt1 up vs E15.5 * Sox10 |
| 10460157 | Cpt1a         | NM_013495    | 0.00128122   | 1.27037 | E15.5 * Wnt1 up vs E15.5 * Sox10 |
| 10533633 | Diablo        | NM_023232    | 0.000114201  | 1.26955 | E15.5 * Wnt1 up vs E15.5 * Sox10 |
| 10572050 | March1        | NM_175188    | 0.00105294   | 1.2691  | E15.5 * Wnt1 up vs E15.5 * Sox10 |
| 10513362 | OTTMUSG00000  | ENSMUST00000 | 0.0041729    | 1.26874 | E15.5 * Wnt1 up vs E15.5 * Sox10 |
| 10592023 | Aplp2         | NM_001102455 | 0.000858487  | 1.26873 | E15.5 * Wnt1 up vs E15.5 * Sox10 |
| 10359024 | EG433367      | ENSMUST00000 | 0.00238268   | 1.26848 | E15.5 * Wnt1 up vs E15.5 * Sox10 |
| 10495869 | Tram1l1       | NM_146140    | 0.00389413   | 1.26846 | E15.5 * Wnt1 up vs E15.5 * Sox10 |
| 10515335 | RP23-233B9.8  | NM_001037916 | 0.00359116   | 1.26825 | E15.5 * Wnt1 up vs E15.5 * Sox10 |
| 10463140 | Lcor          | NM_172154    | 3.93267e-005 | 1.26806 | E15.5 * Wnt1 up vs E15.5 * Sox10 |
| 10419198 | Ero1l         | NM_015774    | 8.42438e-005 | 1.26711 | E15.5 * Wnt1 up vs E15.5 * Sox10 |
| 10477854 | Epb4.1l1      | NM_013510    | 0.000364263  | 1.26577 | E15.5 * Wnt1 up vs E15.5 * Sox10 |
| 10528038 | Adam22        | NM_001007220 | 0.00148516   | 1.26565 | E15.5 * Wnt1 up vs E15.5 * Sox10 |
| 10446553 | Epb4.1l3      | NM_013813    | 6.31595e-005 | 1.26528 | E15.5 * Wnt1 up vs E15.5 * Sox10 |
| 10418991 | Gcap14        | NM_027045    | 0.000253649  | 1.26506 | E15.5 * Wnt1 up vs E15.5 * Sox10 |
| 10516658 | Ccdc28b       | NM_025455    | 9.31855e-005 | 1.26451 | E15.5 * Wnt1 up vs E15.5 * Sox10 |
| 10546977 | Atp2b2        | NM_009723    | 0.000753239  | 1.26432 | E15.5 * Wnt1 up vs E15.5 * Sox10 |
| 10384885 | Spnb2         | NM_175836    | 3.80336e-005 | 1.26301 | E15.5 * Wnt1 up vs E15.5 * Sox10 |
| 10434418 | Vwa5b2        | NM_182636    | 0.000238999  | 1.26274 | E15.5 * Wnt1 up vs E15.5 * Sox10 |
| 10553646 | Herc2         | NM_010418    | 1.98026e-006 | 1.26229 | E15.5 * Wnt1 up vs E15.5 * Sox10 |
| 10469720 | Acbd5         | NM_001102437 | 0.00373513   | 1.26218 | E15.5 * Wnt1 up vs E15.5 * Sox10 |
| 10563941 | ---           | ---          | 0.000521283  | 1.26141 | E15.5 * Wnt1 up vs E15.5 * Sox10 |
| 10600765 | Pcyt1b        | NM_211138    | 0.000559393  | 1.26101 | E15.5 * Wnt1 up vs E15.5 * Sox10 |
| 10391043 | Krt9          | NM_201255    | 0.00272969   | 1.26087 | E15.5 * Wnt1 up vs E15.5 * Sox10 |
| 10404195 | D130043K22Rik | NM_001081051 | 0.000146547  | 1.25935 | E15.5 * Wnt1 up vs E15.5 * Sox10 |
| 10367546 | Oprm1         | NM_001039652 | 0.00191664   | 1.25935 | E15.5 * Wnt1 up vs E15.5 * Sox10 |
| 10493449 | Thbs3         | NM_013691    | 0.000142963  | 1.25932 | E15.5 * Wnt1 up vs E15.5 * Sox10 |
| 10356172 | 5033414K04Rik | BC080290     | 0.00459876   | 1.25889 | E15.5 * Wnt1 up vs E15.5 * Sox10 |
| 10470529 | Olfm1         | NM_019498    | 0.000376769  | 1.25848 | E15.5 * Wnt1 up vs E15.5 * Sox10 |
| 10606064 | Rgag4         | NM_183318    | 0.0012008    | 1.25782 | E15.5 * Wnt1 up vs E15.5 * Sox10 |
| 10517373 | Rcan3         | NM_022980    | 2.46846e-005 | 1.25765 | E15.5 * Wnt1 up vs E15.5 * Sox10 |

|          |               |              |              |         |                                  |
|----------|---------------|--------------|--------------|---------|----------------------------------|
| 10424349 | Sqle          | NM_009270    | 0.00140501   | 1.25692 | E15.5 * Wnt1 up vs E15.5 * Sox10 |
| 10607259 | Tro           | NM_001002272 | 1.80142e-006 | 1.25638 | E15.5 * Wnt1 up vs E15.5 * Sox10 |
| 10369541 | Hk1           | NM_010438    | 0.000328622  | 1.25568 | E15.5 * Wnt1 up vs E15.5 * Sox10 |
| 10460127 | Dok6          | NM_001039173 | 0.00260867   | 1.25552 | E15.5 * Wnt1 up vs E15.5 * Sox10 |
| 10395293 | Atxn711       | NM_001033436 | 0.00227771   | 1.25486 | E15.5 * Wnt1 up vs E15.5 * Sox10 |
| 10593196 | ENSMUSG00000  | ENSMUST00000 | 0.00274471   | 1.25448 | E15.5 * Wnt1 up vs E15.5 * Sox10 |
| 10477725 | Mmp24         | NM_010808    | 0.00130377   | 1.25433 | E15.5 * Wnt1 up vs E15.5 * Sox10 |
| 10589784 | Dclk3         | NM_172928    | 0.00308831   | 1.25403 | E15.5 * Wnt1 up vs E15.5 * Sox10 |
| 10401068 | Spnb1         | NM_013675    | 0.00241146   | 1.25388 | E15.5 * Wnt1 up vs E15.5 * Sox10 |
| 10380341 | Spag9         | NM_027569    | 9.18105e-005 | 1.25325 | E15.5 * Wnt1 up vs E15.5 * Sox10 |
| 10401708 | Ngb           | NM_022414    | 0.000885871  | 1.25271 | E15.5 * Wnt1 up vs E15.5 * Sox10 |
| 10597531 | Rbms3         | NM_178660    | 6.51003e-005 | 1.25266 | E15.5 * Wnt1 up vs E15.5 * Sox10 |
| 10570437 | Fbxo25        | NM_025785    | 0.00458449   | 1.2523  | E15.5 * Wnt1 up vs E15.5 * Sox10 |
| 10384423 | Cobl          | NM_172496    | 0.00451352   | 1.25003 | E15.5 * Wnt1 up vs E15.5 * Sox10 |
| 10429222 | Fam135b       | NM_177819    | 0.00497959   | 1.24996 | E15.5 * Wnt1 up vs E15.5 * Sox10 |
| 10482500 | Rnd3          | NM_028810    | 0.00103789   | 1.24924 | E15.5 * Wnt1 up vs E15.5 * Sox10 |
| 10590888 | EG665154      | XR_031035    | 0.00187116   | 1.24902 | E15.5 * Wnt1 up vs E15.5 * Sox10 |
| 10404702 | Gcnt2         | NM_023887    | 0.00277452   | 1.24885 | E15.5 * Wnt1 up vs E15.5 * Sox10 |
| 10398350 | ---           | ---          | 0.00110835   | 1.24846 | E15.5 * Wnt1 up vs E15.5 * Sox10 |
| 10604505 | 6720401G13Rik | NR_015505    | 0.00230611   | 1.24717 | E15.5 * Wnt1 up vs E15.5 * Sox10 |
| 10500685 | Atp1a1        | NM_144900    | 0.00083409   | 1.24709 | E15.5 * Wnt1 up vs E15.5 * Sox10 |
| 10533007 | Ccdc64        | NM_001080808 | 0.000328519  | 1.24685 | E15.5 * Wnt1 up vs E15.5 * Sox10 |
| 10488033 | Pak7          | NM_172858    | 0.000455122  | 1.24666 | E15.5 * Wnt1 up vs E15.5 * Sox10 |
| 10345141 | Lmbrd1        | NM_026719    | 0.000542046  | 1.24635 | E15.5 * Wnt1 up vs E15.5 * Sox10 |
| 10457250 | Arhgap12      | NM_001039692 | 0.00054578   | 1.24615 | E15.5 * Wnt1 up vs E15.5 * Sox10 |
| 10528548 | Kcnh2         | NM_013569    | 0.00104222   | 1.24579 | E15.5 * Wnt1 up vs E15.5 * Sox10 |
| 10435752 | Lsmp          | NM_175548    | 0.00158896   | 1.2454  | E15.5 * Wnt1 up vs E15.5 * Sox10 |
| 10509014 | D4Wsu53e      | BC043057     | 0.000744974  | 1.24477 | E15.5 * Wnt1 up vs E15.5 * Sox10 |
| 10530215 | 1110003E01Rik | NM_133697    | 0.000931235  | 1.24449 | E15.5 * Wnt1 up vs E15.5 * Sox10 |
| 10597162 | Klhl18        | NM_177771    | 0.000251152  | 1.24444 | E15.5 * Wnt1 up vs E15.5 * Sox10 |
| 10549849 | Zfp78         | NM_001025163 | 0.00440158   | 1.24427 | E15.5 * Wnt1 up vs E15.5 * Sox10 |
| 10384064 | Camk2b        | NM_007595    | 9.03864e-005 | 1.24213 | E15.5 * Wnt1 up vs E15.5 * Sox10 |
| 10584855 | Scn2b         | NM_001014761 | 0.00232505   | 1.2413  | E15.5 * Wnt1 up vs E15.5 * Sox10 |
| 10534168 | Auts2         | NM_177047    | 0.000280318  | 1.24128 | E15.5 * Wnt1 up vs E15.5 * Sox10 |
| 10346843 | Nrp2          | NM_001077403 | 0.00163539   | 1.24099 | E15.5 * Wnt1 up vs E15.5 * Sox10 |
| 10404885 | Gmpr          | NM_025508    | 0.000832947  | 1.24099 | E15.5 * Wnt1 up vs E15.5 * Sox10 |
| 10380641 | Hoxb5         | NM_008268    | 0.000178903  | 1.24051 | E15.5 * Wnt1 up vs E15.5 * Sox10 |
| 10376096 | Acsf6         | NM_001033598 | 0.000277973  | 1.23939 | E15.5 * Wnt1 up vs E15.5 * Sox10 |
| 10546024 | Prokr1        | NM_021381    | 0.00414607   | 1.23925 | E15.5 * Wnt1 up vs E15.5 * Sox10 |
| 10578138 | Dctn6         | NM_011722    | 0.00156902   | 1.23867 | E15.5 * Wnt1 up vs E15.5 * Sox10 |
| 10589350 | Shisa5        | NM_025858    | 9.00744e-005 | 1.23828 | E15.5 * Wnt1 up vs E15.5 * Sox10 |
| 10359235 | Rasal2        | NM_177644    | 8.67199e-005 | 1.23795 | E15.5 * Wnt1 up vs E15.5 * Sox10 |
| 10525236 | AU042671      | BC051044     | 0.00485068   | 1.23787 | E15.5 * Wnt1 up vs E15.5 * Sox10 |
| 10578872 | ---           | ---          | 0.00253062   | 1.23726 | E15.5 * Wnt1 up vs E15.5 * Sox10 |
| 10374406 | Cnrip1        | NM_029861    | 0.00417458   | 1.23696 | E15.5 * Wnt1 up vs E15.5 * Sox10 |
| 10548116 | Ccnd2         | BC049086     | 0.0016789    | 1.23683 | E15.5 * Wnt1 up vs E15.5 * Sox10 |
| 10568024 | Coro1a        | NM_009898    | 0.00499636   | 1.23681 | E15.5 * Wnt1 up vs E15.5 * Sox10 |
| 10533403 | Cux2          | NM_007804    | 0.000485856  | 1.23647 | E15.5 * Wnt1 up vs E15.5 * Sox10 |
| 10490838 | Fabp5         | NM_010634    | 0.000876703  | 1.23588 | E15.5 * Wnt1 up vs E15.5 * Sox10 |
| 10585699 | Fabp5         | NM_010634    | 0.000863893  | 1.2355  | E15.5 * Wnt1 up vs E15.5 * Sox10 |
| 10349404 | Mgat5         | NM_145128    | 0.0018046    | 1.23548 | E15.5 * Wnt1 up vs E15.5 * Sox10 |
| 10363599 | Rufy2         | NM_027425    | 0.00219595   | 1.23508 | E15.5 * Wnt1 up vs E15.5 * Sox10 |
| 10590597 | Sacm1l        | NM_030692    | 0.00301256   | 1.23484 | E15.5 * Wnt1 up vs E15.5 * Sox10 |
| 10376201 | Gpx3          | NM_001083929 | 0.00332084   | 1.2344  | E15.5 * Wnt1 up vs E15.5 * Sox10 |
| 10547553 | Mical3        | NM_153396    | 0.00368663   | 1.23436 | E15.5 * Wnt1 up vs E15.5 * Sox10 |
| 10410973 | ---           | ---          | 0.00370975   | 1.23316 | E15.5 * Wnt1 up vs E15.5 * Sox10 |
| 10577240 | Csmd1         | NM_053171    | 0.00110349   | 1.23298 | E15.5 * Wnt1 up vs E15.5 * Sox10 |
| 10399470 | Trib2         | NM_144551    | 0.00246002   | 1.23217 | E15.5 * Wnt1 up vs E15.5 * Sox10 |
| 10414485 | Olf264        | ENSMUST00000 | 0.000555889  | 1.23141 | E15.5 * Wnt1 up vs E15.5 * Sox10 |
| 10496862 | ---           | ---          | 0.00499353   | 1.23138 | E15.5 * Wnt1 up vs E15.5 * Sox10 |
| 10592772 | Abcg4         | NM_138955    | 0.000713891  | 1.23127 | E15.5 * Wnt1 up vs E15.5 * Sox10 |
| 10454856 | Psd2          | NM_028707    | 0.00337037   | 1.23127 | E15.5 * Wnt1 up vs E15.5 * Sox10 |
| 10405029 | ---           | ---          | 0.00287309   | 1.23096 | E15.5 * Wnt1 up vs E15.5 * Sox10 |
| 10477058 | Scrt2         | ENSMUST00000 | 9.26741e-005 | 1.23036 | E15.5 * Wnt1 up vs E15.5 * Sox10 |
| 10446756 | Ypel5         | NM_027166    | 0.00383525   | 1.23005 | E15.5 * Wnt1 up vs E15.5 * Sox10 |
| 10578810 | Cln3          | NM_173874    | 0.00111035   | 1.22978 | E15.5 * Wnt1 up vs E15.5 * Sox10 |

|                        |               |              |         |                                  |
|------------------------|---------------|--------------|---------|----------------------------------|
| 10400023 Tspan13       | NM_025359     | 0.00317687   | 1.22959 | E15.5 * Wnt1 up vs E15.5 * Sox10 |
| 10515168 Cyp4x1        | NM_001003947  | 0.00197211   | 1.2295  | E15.5 * Wnt1 up vs E15.5 * Sox10 |
| 10513818 Stmn1         | NM_019641     | 1.74304e-007 | 1.22928 | E15.5 * Wnt1 up vs E15.5 * Sox10 |
| 10401343 Map3k9        | NM_177395     | 0.0035815    | 1.22889 | E15.5 * Wnt1 up vs E15.5 * Sox10 |
| 10465244 Malat1        | NR_002847     | 0.00200484   | 1.22829 | E15.5 * Wnt1 up vs E15.5 * Sox10 |
| 10578681               | ---           | 0.00341861   | 1.22822 | E15.5 * Wnt1 up vs E15.5 * Sox10 |
| 10550514 Nova2         | NM_001029877  | 0.00408675   | 1.22731 | E15.5 * Wnt1 up vs E15.5 * Sox10 |
| 10464015 Shoc2         | NM_019658     | 0.000140693  | 1.22656 | E15.5 * Wnt1 up vs E15.5 * Sox10 |
| 10508986 Stmn1         | NM_019641     | 9.20993e-008 | 1.22645 | E15.5 * Wnt1 up vs E15.5 * Sox10 |
| 10351013 Rc3h1         | NM_001024952  | 0.00298789   | 1.22632 | E15.5 * Wnt1 up vs E15.5 * Sox10 |
| 10553833 Ndn           | NM_010882     | 0.00271615   | 1.2259  | E15.5 * Wnt1 up vs E15.5 * Sox10 |
| 10533055 1500001A10Rik | NM_026886     | 0.00232816   | 1.22558 | E15.5 * Wnt1 up vs E15.5 * Sox10 |
| 10442468 Caskin1       | NM_027937     | 0.00116703   | 1.22469 | E15.5 * Wnt1 up vs E15.5 * Sox10 |
| 10433008 Map3k12       | NM_009582     | 0.000962423  | 1.22388 | E15.5 * Wnt1 up vs E15.5 * Sox10 |
| 10372028 Plxnc1        | NM_018797     | 0.0038633    | 1.22331 | E15.5 * Wnt1 up vs E15.5 * Sox10 |
| 10458794 Ccdc112       | ENSMUST000000 | 0.00106379   | 1.22303 | E15.5 * Wnt1 up vs E15.5 * Sox10 |
| 10499470 Rusc1         | NM_028188     | 0.00401831   | 1.22256 | E15.5 * Wnt1 up vs E15.5 * Sox10 |
| 10382096 2310007L24Rik | ENSMUST000000 | 0.00199468   | 1.22229 | E15.5 * Wnt1 up vs E15.5 * Sox10 |
| 10596347 Atp2c1        | NM_175025     | 0.000151465  | 1.22219 | E15.5 * Wnt1 up vs E15.5 * Sox10 |
| 10515994 Smap2         | NM_133716     | 0.00391821   | 1.22207 | E15.5 * Wnt1 up vs E15.5 * Sox10 |
| 10563895               | ---           | 0.0036856    | 1.22203 | E15.5 * Wnt1 up vs E15.5 * Sox10 |
| 10486262 Ltk           | NM_203345     | 0.000236135  | 1.22179 | E15.5 * Wnt1 up vs E15.5 * Sox10 |
| 10453114 Dhx57         | NM_198942     | 0.000676718  | 1.22103 | E15.5 * Wnt1 up vs E15.5 * Sox10 |
| 10382010 Wdr68         | NM_027946     | 0.000316762  | 1.22067 | E15.5 * Wnt1 up vs E15.5 * Sox10 |
| 10422980 Lmbrd2        | NM_177178     | 0.00173742   | 1.21982 | E15.5 * Wnt1 up vs E15.5 * Sox10 |
| 10389786 Hlf           | NM_172563     | 0.00468672   | 1.21922 | E15.5 * Wnt1 up vs E15.5 * Sox10 |
| 10589438 Mtap4         | NM_008633     | 0.000992802  | 1.21797 | E15.5 * Wnt1 up vs E15.5 * Sox10 |
| 10365601 Gnptab        | NM_001004164  | 0.00336813   | 1.2172  | E15.5 * Wnt1 up vs E15.5 * Sox10 |
| 10479925 5430407P10Rik | NM_001159657  | 0.000477875  | 1.216   | E15.5 * Wnt1 up vs E15.5 * Sox10 |
| 10389674 Dynll2        | NM_026556     | 6.75649e-005 | 1.21548 | E15.5 * Wnt1 up vs E15.5 * Sox10 |
| 10464084 Tcf7l2        | NM_001142918  | 0.000338244  | 1.21537 | E15.5 * Wnt1 up vs E15.5 * Sox10 |
| 10529549 Tbc1d14       | NM_001113362  | 0.00312675   | 1.21534 | E15.5 * Wnt1 up vs E15.5 * Sox10 |
| 10465686 Rtn3          | NM_001003934  | 0.000128943  | 1.21409 | E15.5 * Wnt1 up vs E15.5 * Sox10 |
| 10363868 Fam13c        | NM_024244     | 0.0021055    | 1.21374 | E15.5 * Wnt1 up vs E15.5 * Sox10 |
| 10555414 Rab6          | NM_024287     | 0.00358356   | 1.21367 | E15.5 * Wnt1 up vs E15.5 * Sox10 |
| 10503019 4930566N20Rik | ENSMUST000000 | 0.000939309  | 1.21218 | E15.5 * Wnt1 up vs E15.5 * Sox10 |
| 10434302 Khl124        | NM_029436     | 0.00231972   | 1.21168 | E15.5 * Wnt1 up vs E15.5 * Sox10 |
| 10578045 Nrg1          | NM_178591     | 0.00162111   | 1.2116  | E15.5 * Wnt1 up vs E15.5 * Sox10 |
| 10350684 Arpc5         | NM_026369     | 0.00491622   | 1.21132 | E15.5 * Wnt1 up vs E15.5 * Sox10 |
| 10587653 Snx14         | NM_172926     | 0.00326045   | 1.21096 | E15.5 * Wnt1 up vs E15.5 * Sox10 |
| 10585048 Cadm1         | NM_207675     | 0.00105163   | 1.2099  | E15.5 * Wnt1 up vs E15.5 * Sox10 |
| 10563911               | ---           | 0.00166924   | 1.2087  | E15.5 * Wnt1 up vs E15.5 * Sox10 |
| 10360764 Enah          | NM_010135     | 0.000397657  | 1.20832 | E15.5 * Wnt1 up vs E15.5 * Sox10 |
| 10418702 Sh3bp5        | NM_011894     | 0.000223304  | 1.2076  | E15.5 * Wnt1 up vs E15.5 * Sox10 |
| 10407598 Ryr2          | NM_023868     | 0.000520369  | 1.20681 | E15.5 * Wnt1 up vs E15.5 * Sox10 |
| 10437330 Crebbp        | ENSMUST000000 | 4.84353e-006 | 1.20655 | E15.5 * Wnt1 up vs E15.5 * Sox10 |
| 10433717               | ---           | 0.00396156   | 1.20456 | E15.5 * Wnt1 up vs E15.5 * Sox10 |
| 10586505 Herc1         | BC004027      | 0.000457686  | 1.20455 | E15.5 * Wnt1 up vs E15.5 * Sox10 |
| 10382788 Galr2         | NM_010254     | 0.00132435   | 1.20408 | E15.5 * Wnt1 up vs E15.5 * Sox10 |
| 10436608 Cxadr         | NM_009988     | 0.00207453   | 1.20396 | E15.5 * Wnt1 up vs E15.5 * Sox10 |
| 10559853 Ccln4-2       | NM_011334     | 0.000353184  | 1.2029  | E15.5 * Wnt1 up vs E15.5 * Sox10 |
| 10534489 Ccl26         | NM_001013412  | 0.00114176   | 1.20272 | E15.5 * Wnt1 up vs E15.5 * Sox10 |
| 10404380 Dusp22        | NM_001037955  | 0.00386871   | 1.20194 | E15.5 * Wnt1 up vs E15.5 * Sox10 |
| 10401114 Rab15         | NM_134050     | 0.000774113  | 1.20146 | E15.5 * Wnt1 up vs E15.5 * Sox10 |
| 10485395 Trim44        | NM_020267     | 0.00026125   | 1.20108 | E15.5 * Wnt1 up vs E15.5 * Sox10 |
| 10479887 Sec61a2       | NM_021305     | 0.00300732   | 1.20086 | E15.5 * Wnt1 up vs E15.5 * Sox10 |
| 10601235 Ogt           | NM_139144     | 9.7781e-005  | 1.20084 | E15.5 * Wnt1 up vs E15.5 * Sox10 |
| 10453636 Svll          | NM_153153     | 0.0034125    | 1.20073 | E15.5 * Wnt1 up vs E15.5 * Sox10 |
| 10545096 2410003J06Rik | NM_028025     | 0.00475348   | 1.20001 | E15.5 * Wnt1 up vs E15.5 * Sox10 |
| 10400538 Trappc6b      | NM_030057     | 0.00458691   | 1.1999  | E15.5 * Wnt1 up vs E15.5 * Sox10 |
| 10599461 Calm2         | NM_007589     | 0.000209465  | 1.19956 | E15.5 * Wnt1 up vs E15.5 * Sox10 |
| 10464917 Cnih2         | NM_009920     | 0.00293772   | 1.19937 | E15.5 * Wnt1 up vs E15.5 * Sox10 |
| 10344637 Atp6v1h       | NM_133826     | 0.00111476   | 1.19911 | E15.5 * Wnt1 up vs E15.5 * Sox10 |
| 10407097 Pde4d         | NM_011056     | 5.62027e-005 | 1.19812 | E15.5 * Wnt1 up vs E15.5 * Sox10 |
| 10359201 Ralgps2       | NM_023884     | 7.46558e-005 | 1.19786 | E15.5 * Wnt1 up vs E15.5 * Sox10 |
| 10606475 Hdx           | NM_001080549  | 0.00211143   | 1.19566 | E15.5 * Wnt1 up vs E15.5 * Sox10 |

|          |               |              |              |         |                                  |
|----------|---------------|--------------|--------------|---------|----------------------------------|
| 10364601 | Abca7         | NM_013850    | 0.00372439   | 1.19565 | E15.5 * Wnt1 up vs E15.5 * Sox10 |
| 10542310 | Cdkn1b        | NM_009875    | 0.00301183   | 1.19527 | E15.5 * Wnt1 up vs E15.5 * Sox10 |
| 10395976 | Dnajb6        | NM_011847    | 0.00386639   | 1.19523 | E15.5 * Wnt1 up vs E15.5 * Sox10 |
| 10536827 | Ccdc136       | BC006583     | 0.00180871   | 1.19501 | E15.5 * Wnt1 up vs E15.5 * Sox10 |
| 10354404 | Dnajb6        | NM_001037940 | 0.00412399   | 1.19483 | E15.5 * Wnt1 up vs E15.5 * Sox10 |
| 10401244 | Actn1         | NM_134156    | 0.00314927   | 1.19472 | E15.5 * Wnt1 up vs E15.5 * Sox10 |
| 10516103 | Macf1         | NM_009600    | 0.000119094  | 1.19467 | E15.5 * Wnt1 up vs E15.5 * Sox10 |
| 10603492 | Porcn         | NM_016913    | 0.00283174   | 1.19285 | E15.5 * Wnt1 up vs E15.5 * Sox10 |
| 10386636 | Usp22         | NM_001004143 | 0.00112826   | 1.19206 | E15.5 * Wnt1 up vs E15.5 * Sox10 |
| 10386495 | Tom1l2        | NM_153080    | 0.00142876   | 1.19181 | E15.5 * Wnt1 up vs E15.5 * Sox10 |
| 10429802 | Plec1         | NM_011117    | 0.00195845   | 1.19176 | E15.5 * Wnt1 up vs E15.5 * Sox10 |
| 10434733 | Eif4a2        | NM_013506    | 0.00460256   | 1.18974 | E15.5 * Wnt1 up vs E15.5 * Sox10 |
| 10398332 | ---           | ---          | 0.00226825   | 1.18968 | E15.5 * Wnt1 up vs E15.5 * Sox10 |
| 10387014 | Map2k4        | NM_009157    | 0.00126311   | 1.18887 | E15.5 * Wnt1 up vs E15.5 * Sox10 |
| 10455227 | Rnf14         | NM_020012    | 0.000235185  | 1.18869 | E15.5 * Wnt1 up vs E15.5 * Sox10 |
| 10388337 | Pafah1b1      | NM_013625    | 0.000278294  | 1.18837 | E15.5 * Wnt1 up vs E15.5 * Sox10 |
| 10417212 | Itgbl1        | NM_145467    | 0.00255842   | 1.18826 | E15.5 * Wnt1 up vs E15.5 * Sox10 |
| 10481868 | Dnajb6        | NM_011847    | 0.0046592    | 1.18817 | E15.5 * Wnt1 up vs E15.5 * Sox10 |
| 10594315 | Fem1b         | NM_010193    | 1.90995e-005 | 1.18795 | E15.5 * Wnt1 up vs E15.5 * Sox10 |
| 10445781 | Trem2         | NM_031254    | 0.00281265   | 1.18712 | E15.5 * Wnt1 up vs E15.5 * Sox10 |
| 10463704 | As3mt         | NM_020577    | 0.00381388   | 1.18694 | E15.5 * Wnt1 up vs E15.5 * Sox10 |
| 10371188 | Bruno15       | NM_176954    | 0.00422043   | 1.18679 | E15.5 * Wnt1 up vs E15.5 * Sox10 |
| 10578262 | ---           | ---          | 0.000124957  | 1.18636 | E15.5 * Wnt1 up vs E15.5 * Sox10 |
| 10448765 | Mapk8ip3      | NM_013931    | 0.00205657   | 1.18557 | E15.5 * Wnt1 up vs E15.5 * Sox10 |
| 10597377 | Fbxl2         | NM_178624    | 0.00109713   | 1.18511 | E15.5 * Wnt1 up vs E15.5 * Sox10 |
| 10595081 | Tinag         | NM_012033    | 0.00388201   | 1.1842  | E15.5 * Wnt1 up vs E15.5 * Sox10 |
| 10552044 | Dmkn          | NM_172899    | 0.00361967   | 1.18419 | E15.5 * Wnt1 up vs E15.5 * Sox10 |
| 10583773 | BC018242      | NM_144935    | 0.000534084  | 1.18306 | E15.5 * Wnt1 up vs E15.5 * Sox10 |
| 10428238 | Ubr5          | NM_001081359 | 0.00146856   | 1.18287 | E15.5 * Wnt1 up vs E15.5 * Sox10 |
| 10352194 | Cdc42bpa      | BC158017     | 0.000815632  | 1.18266 | E15.5 * Wnt1 up vs E15.5 * Sox10 |
| 10443764 | Slc37a1       | NM_153062    | 0.000310506  | 1.18238 | E15.5 * Wnt1 up vs E15.5 * Sox10 |
| 10502732 | Prkacb        | NM_011100    | 0.00224829   | 1.18157 | E15.5 * Wnt1 up vs E15.5 * Sox10 |
| 10573823 | Chd9          | NM_177224    | 0.00283594   | 1.18052 | E15.5 * Wnt1 up vs E15.5 * Sox10 |
| 10504891 | Tmeff1        | NM_021436    | 0.00221837   | 1.18003 | E15.5 * Wnt1 up vs E15.5 * Sox10 |
| 10462039 | Trpm3         | NM_001035244 | 0.00112118   | 1.17951 | E15.5 * Wnt1 up vs E15.5 * Sox10 |
| 10598678 | Usp9x         | NM_009481    | 0.000440701  | 1.17943 | E15.5 * Wnt1 up vs E15.5 * Sox10 |
| 10514255 | Mllt3         | NM_027326    | 0.000703786  | 1.17852 | E15.5 * Wnt1 up vs E15.5 * Sox10 |
| 10368409 | Lama2         | NM_008481    | 0.00271388   | 1.17692 | E15.5 * Wnt1 up vs E15.5 * Sox10 |
| 10517328 | Tmem50a       | NM_027935    | 0.00062626   | 1.17603 | E15.5 * Wnt1 up vs E15.5 * Sox10 |
| 10395287 | Atxn7l1       | NM_028139    | 0.00231244   | 1.17531 | E15.5 * Wnt1 up vs E15.5 * Sox10 |
| 10453256 | Kcng3         | NM_153512    | 0.00203095   | 1.17437 | E15.5 * Wnt1 up vs E15.5 * Sox10 |
| 10457872 | Slc39a6       | NM_139143    | 0.00144866   | 1.17411 | E15.5 * Wnt1 up vs E15.5 * Sox10 |
| 10604633 | Cxx1b         | NM_001018063 | 0.00134078   | 1.17389 | E15.5 * Wnt1 up vs E15.5 * Sox10 |
| 10552632 | Shank1        | ENSMUST00000 | 0.00172553   | 1.17222 | E15.5 * Wnt1 up vs E15.5 * Sox10 |
| 10372478 | Rab21         | NM_024454    | 0.00148262   | 1.17219 | E15.5 * Wnt1 up vs E15.5 * Sox10 |
| 10516982 | Stx12         | NM_133887    | 0.00280013   | 1.17212 | E15.5 * Wnt1 up vs E15.5 * Sox10 |
| 10418616 | Dnahc1        | BC023155     | 0.000727562  | 1.17178 | E15.5 * Wnt1 up vs E15.5 * Sox10 |
| 10415262 | Wdr23         | NM_133734    | 0.00425907   | 1.17171 | E15.5 * Wnt1 up vs E15.5 * Sox10 |
| 10478077 | B230339M05Rik | NM_177658    | 0.00224841   | 1.17156 | E15.5 * Wnt1 up vs E15.5 * Sox10 |
| 10362896 | Cd24a         | NM_009846    | 0.000718101  | 1.17144 | E15.5 * Wnt1 up vs E15.5 * Sox10 |
| 10422912 | 2410089E03Rik | BC058107     | 1.58783e-005 | 1.17112 | E15.5 * Wnt1 up vs E15.5 * Sox10 |
| 10482880 | Baz2b         | NM_001001182 | 0.000840781  | 1.17079 | E15.5 * Wnt1 up vs E15.5 * Sox10 |
| 10374908 | Rtn4          | NM_194054    | 0.000588065  | 1.16861 | E15.5 * Wnt1 up vs E15.5 * Sox10 |
| 10427895 | Basp1         | NM_027395    | 4.46965e-005 | 1.16765 | E15.5 * Wnt1 up vs E15.5 * Sox10 |
| 10472155 | Kcnj3         | NM_008426    | 0.00450238   | 1.16676 | E15.5 * Wnt1 up vs E15.5 * Sox10 |
| 10504094 | Galt          | NM_016658    | 0.00203587   | 1.16637 | E15.5 * Wnt1 up vs E15.5 * Sox10 |
| 10437080 | Ttc3          | NM_009441    | 8.07638e-005 | 1.16609 | E15.5 * Wnt1 up vs E15.5 * Sox10 |
| 10573128 | Tbc1d9        | NM_001111304 | 0.000252572  | 1.16556 | E15.5 * Wnt1 up vs E15.5 * Sox10 |
| 10594110 | Neo1          | NM_008684    | 0.00055013   | 1.1655  | E15.5 * Wnt1 up vs E15.5 * Sox10 |
| 10373396 | EG667952      | ENSMUST00000 | 0.00388624   | 1.16321 | E15.5 * Wnt1 up vs E15.5 * Sox10 |
| 10429949 | Rpl29         | NM_009082    | 0.00473938   | 1.16294 | E15.5 * Wnt1 up vs E15.5 * Sox10 |
| 10471953 | Acvr2a        | NM_007396    | 0.00113152   | 1.16275 | E15.5 * Wnt1 up vs E15.5 * Sox10 |
| 10597933 | ---           | ---          | 0.000845901  | 1.16264 | E15.5 * Wnt1 up vs E15.5 * Sox10 |
| 10604637 | Cxx1b         | NM_001018063 | 0.00212009   | 1.16126 | E15.5 * Wnt1 up vs E15.5 * Sox10 |
| 10406551 | Ssbp2         | NM_024272    | 0.00226747   | 1.16109 | E15.5 * Wnt1 up vs E15.5 * Sox10 |
| 10475625 | Eid1          | NM_025613    | 0.000850917  | 1.15982 | E15.5 * Wnt1 up vs E15.5 * Sox10 |

|                        |              |              |         |                                  |
|------------------------|--------------|--------------|---------|----------------------------------|
| 10437992 Dnm1l         | NM_152816    | 0.00381404   | 1.15921 | E15.5 * Wnt1 up vs E15.5 * Sox10 |
| 10360506 Akt3          | NM_011785    | 0.00358476   | 1.15885 | E15.5 * Wnt1 up vs E15.5 * Sox10 |
| 10588195 9630041A04Rik | ENSMUST00000 | 0.00343423   | 1.15847 | E15.5 * Wnt1 up vs E15.5 * Sox10 |
| 10362149 Taar2         | NM_001007266 | 0.000567135  | 1.15768 | E15.5 * Wnt1 up vs E15.5 * Sox10 |
| 10397752 Calm1         | NM_009790    | 2.14902e-005 | 1.1575  | E15.5 * Wnt1 up vs E15.5 * Sox10 |
| 10417895 Ppp3cb        | NM_008914    | 0.00318694   | 1.15684 | E15.5 * Wnt1 up vs E15.5 * Sox10 |
| 10376033 Kif3a         | NM_008443    | 0.00197175   | 1.15374 | E15.5 * Wnt1 up vs E15.5 * Sox10 |
| 10514668 Jak1          | NM_146145    | 0.000425256  | 1.15233 | E15.5 * Wnt1 up vs E15.5 * Sox10 |
| 10358191 Camsap1l1     | NM_001081360 | 0.000782226  | 1.15232 | E15.5 * Wnt1 up vs E15.5 * Sox10 |
| 10590690 Dync2h1       | NM_029851    | 0.00407004   | 1.15087 | E15.5 * Wnt1 up vs E15.5 * Sox10 |
| 10515051 Osbp19        | NM_133885    | 0.00265854   | 1.15077 | E15.5 * Wnt1 up vs E15.5 * Sox10 |
| 10601778 Armcx3        | NM_027870    | 0.00325444   | 1.15036 | E15.5 * Wnt1 up vs E15.5 * Sox10 |
| 10454286 Mapre2        | NM_153058    | 0.0042736    | 1.14964 | E15.5 * Wnt1 up vs E15.5 * Sox10 |
| 10563961               | ---          | 0.00102948   | 1.14885 | E15.5 * Wnt1 up vs E15.5 * Sox10 |
| 10551009 Tmsb10        | NM_025284    | 5.14271e-005 | 1.14858 | E15.5 * Wnt1 up vs E15.5 * Sox10 |
| 10494413 Rnu1b1        | NR_004412    | 0.00343471   | 1.14809 | E15.5 * Wnt1 up vs E15.5 * Sox10 |
| 10494421 Rnu1b1        | NR_004412    | 0.00343471   | 1.14809 | E15.5 * Wnt1 up vs E15.5 * Sox10 |
| 10500343 Rnu1b1        | NR_004412    | 0.00343471   | 1.14809 | E15.5 * Wnt1 up vs E15.5 * Sox10 |
| 10500358 Rnu1b1        | NR_004412    | 0.00343471   | 1.14809 | E15.5 * Wnt1 up vs E15.5 * Sox10 |
| 10512937 Rnu1b1        | NR_004412    | 0.00343471   | 1.14809 | E15.5 * Wnt1 up vs E15.5 * Sox10 |
| 10455238 Ndfip1        | NM_022996    | 0.00324568   | 1.14755 | E15.5 * Wnt1 up vs E15.5 * Sox10 |
| 10582551 Dbn1d1        | NM_028146    | 0.00016579   | 1.1465  | E15.5 * Wnt1 up vs E15.5 * Sox10 |
| 10367224 Stat2         | NM_019963    | 0.00260344   | 1.14326 | E15.5 * Wnt1 up vs E15.5 * Sox10 |
| 10553115 Lmtk3         | NM_001005511 | 0.00292125   | 1.14201 | E15.5 * Wnt1 up vs E15.5 * Sox10 |
| 10551417 Zfp59         | NM_011762    | 0.000394426  | 1.14145 | E15.5 * Wnt1 up vs E15.5 * Sox10 |
| 10391378 Ezh1          | NM_007970    | 0.00133573   | 1.14084 | E15.5 * Wnt1 up vs E15.5 * Sox10 |
| 10366004 Atp2b1        | NM_026482    | 4.19982e-005 | 1.14068 | E15.5 * Wnt1 up vs E15.5 * Sox10 |
| 10587107 Myo5a         | NM_010864    | 0.00234996   | 1.13982 | E15.5 * Wnt1 up vs E15.5 * Sox10 |
| 10448081 Rgmb          | NM_178615    | 0.00283956   | 1.13797 | E15.5 * Wnt1 up vs E15.5 * Sox10 |
| 10474411 Lin7c         | NM_011699    | 0.00020715   | 1.13779 | E15.5 * Wnt1 up vs E15.5 * Sox10 |
| 10407766 Lgals8        | NM_018886    | 0.00368641   | 1.13643 | E15.5 * Wnt1 up vs E15.5 * Sox10 |
| 10549923 Vmn2r48       | NM_001105152 | 0.00274265   | 1.13633 | E15.5 * Wnt1 up vs E15.5 * Sox10 |
| 10453451 Calm2         | NM_007589    | 9.90521e-005 | 1.13604 | E15.5 * Wnt1 up vs E15.5 * Sox10 |
| 10555425 Fam168a       | BC079886     | 0.00289131   | 1.13561 | E15.5 * Wnt1 up vs E15.5 * Sox10 |
| 10468089 Mgea5         | NM_023799    | 0.00112766   | 1.13555 | E15.5 * Wnt1 up vs E15.5 * Sox10 |
| 10389882 3300001P08Rik | NM_026313    | 0.000157948  | 1.13361 | E15.5 * Wnt1 up vs E15.5 * Sox10 |
| 10396926 Sfrs5         | NM_001079695 | 0.00352577   | 1.13357 | E15.5 * Wnt1 up vs E15.5 * Sox10 |
| 10475879 Gm355         | ENSMUST00000 | 0.00321977   | 1.13153 | E15.5 * Wnt1 up vs E15.5 * Sox10 |
| 10545479 Tmsb10        | NM_025284    | 1.54589e-005 | 1.13141 | E15.5 * Wnt1 up vs E15.5 * Sox10 |
| 10503917 Akirin2       | NM_001007589 | 0.000767121  | 1.13099 | E15.5 * Wnt1 up vs E15.5 * Sox10 |
| 10463153 Morf4l1       | NM_024431    | 0.00243842   | 1.13077 | E15.5 * Wnt1 up vs E15.5 * Sox10 |
| 10478698 Eya2          | NM_010165    | 0.00173845   | 1.13018 | E15.5 * Wnt1 up vs E15.5 * Sox10 |
| 10592847 EG667952      | ENSMUST00000 | 0.00105325   | 1.12917 | E15.5 * Wnt1 up vs E15.5 * Sox10 |
| 10377537 Chd3          | NM_146019    | 0.00117535   | 1.12802 | E15.5 * Wnt1 up vs E15.5 * Sox10 |
| 10354372 EG667952      | ENSMUST00000 | 0.00304233   | 1.1273  | E15.5 * Wnt1 up vs E15.5 * Sox10 |
| 10442134 Vmn2r107      | NM_001104569 | 0.00253833   | 1.12685 | E15.5 * Wnt1 up vs E15.5 * Sox10 |
| 10482181 Strbp         | NM_009261    | 0.00368459   | 1.12539 | E15.5 * Wnt1 up vs E15.5 * Sox10 |
| 10577882 Hgsnat        | NM_029884    | 0.00220767   | 1.12473 | E15.5 * Wnt1 up vs E15.5 * Sox10 |
| 10427807 Sub1          | NM_011294    | 5.72892e-005 | 1.12366 | E15.5 * Wnt1 up vs E15.5 * Sox10 |
| 10598020               | ---          | 0.000278298  | 1.12205 | E15.5 * Wnt1 up vs E15.5 * Sox10 |
| 10413951 Arhgap22      | NM_153800    | 0.00353872   | 1.12064 | E15.5 * Wnt1 up vs E15.5 * Sox10 |
| 10355069 Ino80d        | NM_001114609 | 0.000877373  | 1.12034 | E15.5 * Wnt1 up vs E15.5 * Sox10 |
| 10598036 COX1          | ENSMUST00000 | 0.00462284   | 1.12008 | E15.5 * Wnt1 up vs E15.5 * Sox10 |
| 10457888 5730494M16Rik | NM_001004361 | 0.00283385   | 1.11952 | E15.5 * Wnt1 up vs E15.5 * Sox10 |
| 10438530 Clcn2         | NM_009900    | 0.00232355   | 1.11809 | E15.5 * Wnt1 up vs E15.5 * Sox10 |
| 10508490 Sfrs5         | NM_001079695 | 0.00372619   | 1.11763 | E15.5 * Wnt1 up vs E15.5 * Sox10 |
| 10607865 Tmsb4x        | NM_021278    | 0.00255503   | 1.11284 | E15.5 * Wnt1 up vs E15.5 * Sox10 |
| 10386743 Epn2          | NM_010148    | 0.00256417   | 1.11093 | E15.5 * Wnt1 up vs E15.5 * Sox10 |
| 10421488 Fndc3a        | NM_207636    | 0.00389425   | 1.11075 | E15.5 * Wnt1 up vs E15.5 * Sox10 |
| 10414313 Ubb           | NM_011664    | 1.58264e-006 | 1.11065 | E15.5 * Wnt1 up vs E15.5 * Sox10 |
| 10376864 Ubb           | NM_011664    | 2.6099e-006  | 1.11044 | E15.5 * Wnt1 up vs E15.5 * Sox10 |
| 10412011 Kif2a         | NM_008442    | 0.000122655  | 1.10895 | E15.5 * Wnt1 up vs E15.5 * Sox10 |
| 10473541 Olfr1125      | ENSMUST00000 | 0.00254639   | 1.10706 | E15.5 * Wnt1 up vs E15.5 * Sox10 |
| 10345037 Paqr8         | NM_028829    | 0.00412908   | 1.10657 | E15.5 * Wnt1 up vs E15.5 * Sox10 |
| 10598025               | ---          | 0.00266888   | 1.10183 | E15.5 * Wnt1 up vs E15.5 * Sox10 |
| 10465649 Mark2         | NM_007928    | 0.000395073  | 1.09623 | E15.5 * Wnt1 up vs E15.5 * Sox10 |

|          |               |               |              |          |                                    |
|----------|---------------|---------------|--------------|----------|------------------------------------|
| 10384522 | Actr2         | NM_146243     | 0.00209852   | 1.09576  | E15.5 * Wnt1 up vs E15.5 * Sox10   |
| 10596769 | Rbm5          | NM_148930     | 0.00352288   | 1.09174  | E15.5 * Wnt1 up vs E15.5 * Sox10   |
| 10503134 | Sdcbp         | NM_001098227  | 0.00144985   | 1.08844  | E15.5 * Wnt1 up vs E15.5 * Sox10   |
| 10417601 | Ptma          | NM_008972     | 0.00332433   | 1.08686  | E15.5 * Wnt1 up vs E15.5 * Sox10   |
| 10348078 | Ptma          | NM_008972     | 0.00141805   | 1.08498  | E15.5 * Wnt1 up vs E15.5 * Sox10   |
| 10411776 | H3f3a         | NM_008210     | 0.000178954  | 1.08458  | E15.5 * Wnt1 up vs E15.5 * Sox10   |
| 10598069 | CYTB          | ENSMUST000001 | 0.00152292   | 1.07921  | E15.5 * Wnt1 up vs E15.5 * Sox10   |
| 10503150 | Rab2a         | NM_021518     | 0.00337501   | 1.06928  | E15.5 * Wnt1 up vs E15.5 * Sox10   |
| 10594142 | Rpl11         | NM_025919     | 0.000180429  | -1.05211 | E15.5 * Wnt1 down vs E15.5 * Sox10 |
| 10450063 | Rps18         | NM_011296     | 0.00162833   | -1.05244 | E15.5 * Wnt1 down vs E15.5 * Sox10 |
| 10451301 | Rpl11         | NM_025919     | 0.0007205    | -1.05375 | E15.5 * Wnt1 down vs E15.5 * Sox10 |
| 10502745 | Rpl11         | NM_025919     | 0.000725362  | -1.05392 | E15.5 * Wnt1 down vs E15.5 * Sox10 |
| 10517457 | Rpl11         | NM_025919     | 0.000260522  | -1.05436 | E15.5 * Wnt1 down vs E15.5 * Sox10 |
| 10404354 | Rps18         | NM_011296     | 0.00147993   | -1.05657 | E15.5 * Wnt1 down vs E15.5 * Sox10 |
| 10581535 | Rps18         | NM_011296     | 0.000681621  | -1.05704 | E15.5 * Wnt1 down vs E15.5 * Sox10 |
| 10410506 | Rpl9          | NM_011292     | 0.00193919   | -1.05726 | E15.5 * Wnt1 down vs E15.5 * Sox10 |
| 10543464 | Rpl7a         | NM_013721     | 0.00496631   | -1.05778 | E15.5 * Wnt1 down vs E15.5 * Sox10 |
| 10407535 | Rpl10a        | NM_011287     | 0.004323     | -1.0583  | E15.5 * Wnt1 down vs E15.5 * Sox10 |
| 10530194 | Rpl9          | NM_011292     | 0.00232915   | -1.05917 | E15.5 * Wnt1 down vs E15.5 * Sox10 |
| 10454097 | Rpl11         | NM_025919     | 0.000333555  | -1.06042 | E15.5 * Wnt1 down vs E15.5 * Sox10 |
| 10586157 | Rpl4          | NM_024212     | 0.00109278   | -1.06303 | E15.5 * Wnt1 down vs E15.5 * Sox10 |
| 10428554 | Eif3h         | NM_080635     | 0.00146743   | -1.06479 | E15.5 * Wnt1 down vs E15.5 * Sox10 |
| 10491730 | Rps23         | NM_024175     | 0.00456187   | -1.06701 | E15.5 * Wnt1 down vs E15.5 * Sox10 |
| 10439402 | Rpl9          | NM_011292     | 0.00254515   | -1.06849 | E15.5 * Wnt1 down vs E15.5 * Sox10 |
| 10546054 | Rpl3          | NM_013762     | 0.00345469   | -1.06893 | E15.5 * Wnt1 down vs E15.5 * Sox10 |
| 10550052 | Rps5          | NM_009095     | 1.92921e-005 | -1.06955 | E15.5 * Wnt1 down vs E15.5 * Sox10 |
| 10490370 | Psmc7         | NM_011969     | 0.0033052    | -1.07209 | E15.5 * Wnt1 down vs E15.5 * Sox10 |
| 10355173 | Rpl10a        | NM_011287     | 0.000568182  | -1.07214 | E15.5 * Wnt1 down vs E15.5 * Sox10 |
| 10405890 | Rpl9          | NM_011292     | 0.000893802  | -1.07249 | E15.5 * Wnt1 down vs E15.5 * Sox10 |
| 10496032 | Rpl12         | NM_009076     | 0.00204954   | -1.07571 | E15.5 * Wnt1 down vs E15.5 * Sox10 |
| 10443360 | Rpl10a        | NM_011287     | 0.000961512  | -1.07673 | E15.5 * Wnt1 down vs E15.5 * Sox10 |
| 10567020 | Rpl7a         | BC091731      | 0.00197776   | -1.0786  | E15.5 * Wnt1 down vs E15.5 * Sox10 |
| 10368504 | Rpl12         | NM_009076     | 0.00294694   | -1.07933 | E15.5 * Wnt1 down vs E15.5 * Sox10 |
| 10560103 | Rps8          | NM_009098     | 0.000623537  | -1.08147 | E15.5 * Wnt1 down vs E15.5 * Sox10 |
| 10528544 | Rpl11         | NM_025919     | 0.00270704   | -1.08193 | E15.5 * Wnt1 down vs E15.5 * Sox10 |
| 10411393 | Rps18         | NM_011296     | 8.86352e-005 | -1.08434 | E15.5 * Wnt1 down vs E15.5 * Sox10 |
| 10430669 | Rpl3          | NM_013762     | 5.25904e-005 | -1.08963 | E15.5 * Wnt1 down vs E15.5 * Sox10 |
| 10411363 | 5730427N09Rik | NM_021552     | 0.000233486  | -1.08966 | E15.5 * Wnt1 down vs E15.5 * Sox10 |
| 10598721 | Rpl3          | NM_013762     | 3.54482e-005 | -1.09078 | E15.5 * Wnt1 down vs E15.5 * Sox10 |
| 10502165 | Sec24b        | NM_207209     | 0.00408912   | -1.09219 | E15.5 * Wnt1 down vs E15.5 * Sox10 |
| 10406541 | Rps23         | NM_024175     | 0.00137344   | -1.09261 | E15.5 * Wnt1 down vs E15.5 * Sox10 |
| 10459705 | Smad4         | NM_008540     | 0.00418298   | -1.09443 | E15.5 * Wnt1 down vs E15.5 * Sox10 |
| 10371981 | Ccdc38        | NM_175488     | 0.000176717  | -1.09575 | E15.5 * Wnt1 down vs E15.5 * Sox10 |
| 10348004 | Psmd1         | NM_027357     | 0.00302281   | -1.09583 | E15.5 * Wnt1 down vs E15.5 * Sox10 |
| 10404262 | Rps8          | NM_009098     | 2.59148e-005 | -1.09694 | E15.5 * Wnt1 down vs E15.5 * Sox10 |
| 10396237 | 2700049A03Rik | BC150744      | 0.00242146   | -1.0987  | E15.5 * Wnt1 down vs E15.5 * Sox10 |
| 10462081 | 5730427N09Rik | NM_021552     | 0.00239781   | -1.09969 | E15.5 * Wnt1 down vs E15.5 * Sox10 |
| 10535927 | Nme2          | NM_008705     | 0.002138     | -1.09977 | E15.5 * Wnt1 down vs E15.5 * Sox10 |
| 10525657 | Denr          | NM_026603     | 0.00500175   | -1.10002 | E15.5 * Wnt1 down vs E15.5 * Sox10 |
| 10474485 | Olfr1280      | NM_146908     | 0.00360502   | -1.1006  | E15.5 * Wnt1 down vs E15.5 * Sox10 |
| 10572301 | Mef2b         | NM_008578     | 0.00282956   | -1.10101 | E15.5 * Wnt1 down vs E15.5 * Sox10 |
| 10601390 | Pgk1          | NM_008828     | 0.00239189   | -1.10136 | E15.5 * Wnt1 down vs E15.5 * Sox10 |
| 10373709 | Eif4enif1     | NM_023743     | 0.00272686   | -1.10305 | E15.5 * Wnt1 down vs E15.5 * Sox10 |
| 10607388 | Rpl7a         | NM_013721     | 0.00317845   | -1.10312 | E15.5 * Wnt1 down vs E15.5 * Sox10 |
| 10399379 | Pgk1          | NM_008828     | 0.00175641   | -1.10314 | E15.5 * Wnt1 down vs E15.5 * Sox10 |
| 10498313 | Pgk1          | NM_008828     | 0.00175641   | -1.10314 | E15.5 * Wnt1 down vs E15.5 * Sox10 |
| 10594752 | Rpl7a         | NM_013721     | 1.43077e-005 | -1.10325 | E15.5 * Wnt1 down vs E15.5 * Sox10 |
| 10549714 | Rpl28         | NM_009081     | 0.00258848   | -1.1047  | E15.5 * Wnt1 down vs E15.5 * Sox10 |
| 10531133 | Grsf1         | NM_178700     | 0.00207284   | -1.10593 | E15.5 * Wnt1 down vs E15.5 * Sox10 |
| 10543650 | Tnpo3         | NM_177296     | 0.00268334   | -1.10643 | E15.5 * Wnt1 down vs E15.5 * Sox10 |
| 10487513 | Anapc1        | NM_008569     | 0.00107128   | -1.10697 | E15.5 * Wnt1 down vs E15.5 * Sox10 |
| 10522716 | Polr2b        | NM_153798     | 0.00162172   | -1.10708 | E15.5 * Wnt1 down vs E15.5 * Sox10 |
| 10380732 | Mrpl10        | NM_026154     | 0.00173495   | -1.10767 | E15.5 * Wnt1 down vs E15.5 * Sox10 |
| 10394609 | Rpl36         | NM_018730     | 0.00128092   | -1.10786 | E15.5 * Wnt1 down vs E15.5 * Sox10 |
| 10432162 | 2310037I24Rik | BC003301      | 0.00209651   | -1.10839 | E15.5 * Wnt1 down vs E15.5 * Sox10 |
| 10378783 | Rpl36         | NM_018730     | 0.000619757  | -1.10864 | E15.5 * Wnt1 down vs E15.5 * Sox10 |

|                        |              |              |          |                                    |
|------------------------|--------------|--------------|----------|------------------------------------|
| 10515383 Rpl36         | NM_018730    | 0.000928886  | -1.11049 | E15.5 * Wnt1 down vs E15.5 * Sox10 |
| 10594946 Rpl36         | NM_018730    | 0.000479098  | -1.11119 | E15.5 * Wnt1 down vs E15.5 * Sox10 |
| 10428192 Pabpc1        | NM_008774    | 0.00189469   | -1.11266 | E15.5 * Wnt1 down vs E15.5 * Sox10 |
| 10478196 Top1          | NM_009408    | 0.00241279   | -1.11308 | E15.5 * Wnt1 down vs E15.5 * Sox10 |
| 10471358 Rpl36         | NM_018730    | 0.000573806  | -1.11322 | E15.5 * Wnt1 down vs E15.5 * Sox10 |
| 10382139 Psmd12        | NM_025894    | 0.000335386  | -1.11538 | E15.5 * Wnt1 down vs E15.5 * Sox10 |
| 10603011 Rbbp7         | NM_009031    | 9.51576e-005 | -1.11732 | E15.5 * Wnt1 down vs E15.5 * Sox10 |
| 10501649 Rtc1          | NM_025517    | 0.00345605   | -1.11754 | E15.5 * Wnt1 down vs E15.5 * Sox10 |
| 10446131 Rpl36         | NM_018730    | 0.000339944  | -1.11829 | E15.5 * Wnt1 down vs E15.5 * Sox10 |
| 10574033 Nup93         | NM_172410    | 0.00065296   | -1.11858 | E15.5 * Wnt1 down vs E15.5 * Sox10 |
| 10426648 Rpl36         | NM_018730    | 0.000164245  | -1.11885 | E15.5 * Wnt1 down vs E15.5 * Sox10 |
| 10463826 6330577E15Rik | NM_026377    | 0.00130399   | -1.11889 | E15.5 * Wnt1 down vs E15.5 * Sox10 |
| 10452658 Smchd1        | NM_028887    | 0.00497737   | -1.11986 | E15.5 * Wnt1 down vs E15.5 * Sox10 |
| 10592138 Rpl36         | NM_018730    | 0.00113745   | -1.11987 | E15.5 * Wnt1 down vs E15.5 * Sox10 |
| 10546801 Rpl36         | NM_018730    | 9.44617e-005 | -1.12003 | E15.5 * Wnt1 down vs E15.5 * Sox10 |
| 10515154 Rpl3          | NM_013762    | 5.05368e-005 | -1.12011 | E15.5 * Wnt1 down vs E15.5 * Sox10 |
| 10466342 Olfr1453      | NM_146700    | 0.00299934   | -1.12037 | E15.5 * Wnt1 down vs E15.5 * Sox10 |
| 10429657 Eef1d         | NM_029663    | 0.00147231   | -1.12043 | E15.5 * Wnt1 down vs E15.5 * Sox10 |
| 10454296 Rpl19         | NM_009078    | 0.00101349   | -1.12123 | E15.5 * Wnt1 down vs E15.5 * Sox10 |
| 10433073 ENSMUSG00000  | ENSMUST00000 | 0.00295861   | -1.12125 | E15.5 * Wnt1 down vs E15.5 * Sox10 |
| 10401805 Snw1          | NM_025507    | 0.00474411   | -1.12343 | E15.5 * Wnt1 down vs E15.5 * Sox10 |
| 10377851 Psmb6         | NM_008946    | 0.00316996   | -1.12373 | E15.5 * Wnt1 down vs E15.5 * Sox10 |
| 10526319 Baz1b         | NM_011714    | 0.000276276  | -1.12423 | E15.5 * Wnt1 down vs E15.5 * Sox10 |
| 10490544 Ythdf1        | NM_173761    | 0.00109395   | -1.12491 | E15.5 * Wnt1 down vs E15.5 * Sox10 |
| 10395163 Lamb1-1       | NM_008482    | 0.00472044   | -1.12496 | E15.5 * Wnt1 down vs E15.5 * Sox10 |
| 10504047 Ube2r2        | NM_026275    | 0.00486537   | -1.12545 | E15.5 * Wnt1 down vs E15.5 * Sox10 |
| 10441987 Chd1          | NM_007690    | 0.00213142   | -1.12554 | E15.5 * Wnt1 down vs E15.5 * Sox10 |
| 10374564 Cct4          | NM_009837    | 0.00387239   | -1.12587 | E15.5 * Wnt1 down vs E15.5 * Sox10 |
| 10578391 Smarce1       | NM_020618    | 0.00469874   | -1.12645 | E15.5 * Wnt1 down vs E15.5 * Sox10 |
| 10564343 Tjp1          | NM_009386    | 0.000962811  | -1.12718 | E15.5 * Wnt1 down vs E15.5 * Sox10 |
| 10422321 Dzip1         | NM_025943    | 0.000873756  | -1.12774 | E15.5 * Wnt1 down vs E15.5 * Sox10 |
| 10399430 Ddx1          | NM_134040    | 0.00339147   | -1.12797 | E15.5 * Wnt1 down vs E15.5 * Sox10 |
| 10503723 Mdn1          | NM_001081392 | 0.00121536   | -1.12816 | E15.5 * Wnt1 down vs E15.5 * Sox10 |
| 10401519 Npc2          | NM_023409    | 0.0049936    | -1.12909 | E15.5 * Wnt1 down vs E15.5 * Sox10 |
| 10566097 Nup98         | NM_022979    | 0.00436884   | -1.1292  | E15.5 * Wnt1 down vs E15.5 * Sox10 |
| 10401637 Nek9          | NM_145138    | 0.000643279  | -1.12941 | E15.5 * Wnt1 down vs E15.5 * Sox10 |
| 10487629 Idh3b         | NM_130884    | 0.00303487   | -1.1305  | E15.5 * Wnt1 down vs E15.5 * Sox10 |
| 10496475 Adh5          | NM_007410    | 0.000122623  | -1.13218 | E15.5 * Wnt1 down vs E15.5 * Sox10 |
| 10556764 Ppp1cc        | NM_013636    | 0.000261534  | -1.13229 | E15.5 * Wnt1 down vs E15.5 * Sox10 |
| 10499879 Rpl3          | NM_013762    | 0.00174991   | -1.13605 | E15.5 * Wnt1 down vs E15.5 * Sox10 |
| 10499881 Rpl3          | NM_013762    | 0.00174991   | -1.13605 | E15.5 * Wnt1 down vs E15.5 * Sox10 |
| 10570625 Rpl19         | NM_009078    | 0.00014207   | -1.13701 | E15.5 * Wnt1 down vs E15.5 * Sox10 |
| 10371877 Slc25a3       | NM_133668    | 0.000473819  | -1.13767 | E15.5 * Wnt1 down vs E15.5 * Sox10 |
| 10422852 Rpl19         | NM_009078    | 0.000130349  | -1.13772 | E15.5 * Wnt1 down vs E15.5 * Sox10 |
| 10492671 Ppid          | NM_026352    | 0.00462713   | -1.13776 | E15.5 * Wnt1 down vs E15.5 * Sox10 |
| 10552740 Nup62         | NM_053074    | 0.00120479   | -1.13779 | E15.5 * Wnt1 down vs E15.5 * Sox10 |
| 10380833 Rpl19         | NM_009078    | 0.00015244   | -1.13824 | E15.5 * Wnt1 down vs E15.5 * Sox10 |
| 10421456 Xpo7          | NM_023045    | 0.000446546  | -1.13838 | E15.5 * Wnt1 down vs E15.5 * Sox10 |
| 10405971 Nsun2         | NM_145354    | 0.00184335   | -1.13867 | E15.5 * Wnt1 down vs E15.5 * Sox10 |
| 10370127 Pcnt          | NM_008787    | 0.00188034   | -1.13963 | E15.5 * Wnt1 down vs E15.5 * Sox10 |
| 10385159 Rars          | NM_025936    | 1.09749e-005 | -1.14057 | E15.5 * Wnt1 down vs E15.5 * Sox10 |
| 10486522 Zfp106        | NM_011743    | 0.00286507   | -1.14093 | E15.5 * Wnt1 down vs E15.5 * Sox10 |
| 10512111 Smu1          | NM_021535    | 0.00153075   | -1.14106 | E15.5 * Wnt1 down vs E15.5 * Sox10 |
| 10388010 C1qbp         | NM_007573    | 0.000110147  | -1.14115 | E15.5 * Wnt1 down vs E15.5 * Sox10 |
| 10496737 Bcl10         | NM_009740    | 0.00451883   | -1.14141 | E15.5 * Wnt1 down vs E15.5 * Sox10 |
| 10428912               | ---          | 0.000469619  | -1.14148 | E15.5 * Wnt1 down vs E15.5 * Sox10 |
| 10525352 Ppp1cc        | NM_013636    | 9.26181e-005 | -1.14165 | E15.5 * Wnt1 down vs E15.5 * Sox10 |
| 10566662 Olfr469       | NM_146426    | 0.00107636   | -1.14184 | E15.5 * Wnt1 down vs E15.5 * Sox10 |
| 10366301 Rpl6          | NM_011290    | 4.14199e-005 | -1.14211 | E15.5 * Wnt1 down vs E15.5 * Sox10 |
| 10522596 Tmem165       | NM_011626    | 0.000749294  | -1.1422  | E15.5 * Wnt1 down vs E15.5 * Sox10 |
| 10378579 Prpf8         | NM_138659    | 0.00331061   | -1.14238 | E15.5 * Wnt1 down vs E15.5 * Sox10 |
| 10454469 Ammcr1l       | NM_153515    | 0.00062887   | -1.14277 | E15.5 * Wnt1 down vs E15.5 * Sox10 |
| 10408684 Tmed10        | NM_026775    | 2.98334e-006 | -1.14295 | E15.5 * Wnt1 down vs E15.5 * Sox10 |
| 10345882 Mrps9         | NM_023514    | 0.0018976    | -1.143   | E15.5 * Wnt1 down vs E15.5 * Sox10 |
| 10528340 Dnajc2        | NM_009584    | 0.00449241   | -1.14309 | E15.5 * Wnt1 down vs E15.5 * Sox10 |
| 10383671 Drg1          | NM_007879    | 0.00332746   | -1.1434  | E15.5 * Wnt1 down vs E15.5 * Sox10 |

|                        |              |              |          |                                    |
|------------------------|--------------|--------------|----------|------------------------------------|
| 10398195 Ccnk          | NM_009832    | 0.00330914   | -1.14351 | E15.5 * Wnt1 down vs E15.5 * Sox10 |
| 10360225 Timm23        | NM_016897    | 0.00147363   | -1.14391 | E15.5 * Wnt1 down vs E15.5 * Sox10 |
| 10416069 Timm23        | NM_016897    | 0.00147363   | -1.14391 | E15.5 * Wnt1 down vs E15.5 * Sox10 |
| 10375125 Ssbp1         | NM_212468    | 0.00201575   | -1.14417 | E15.5 * Wnt1 down vs E15.5 * Sox10 |
| 10407543 Gtpbp4        | NM_027000    | 0.00426589   | -1.14433 | E15.5 * Wnt1 down vs E15.5 * Sox10 |
| 10409557 H2afy         | NM_012015    | 0.00108981   | -1.14467 | E15.5 * Wnt1 down vs E15.5 * Sox10 |
| 10494306 Mcl1          | NM_008562    | 0.00341745   | -1.14496 | E15.5 * Wnt1 down vs E15.5 * Sox10 |
| 10590892 Cep57         | NM_026665    | 0.00151693   | -1.14543 | E15.5 * Wnt1 down vs E15.5 * Sox10 |
| 10554045 Adamts17      | NM_001033877 | 0.00278449   | -1.14563 | E15.5 * Wnt1 down vs E15.5 * Sox10 |
| 10397818 Cpsf2         | NM_016856    | 0.000329914  | -1.14584 | E15.5 * Wnt1 down vs E15.5 * Sox10 |
| 10498837 Etfdh         | NM_025794    | 0.000717425  | -1.14586 | E15.5 * Wnt1 down vs E15.5 * Sox10 |
| 10477946 Rpn2          | NM_019642    | 0.00262452   | -1.14689 | E15.5 * Wnt1 down vs E15.5 * Sox10 |
| 10578763 Sap30         | NM_021788    | 0.0026975    | -1.14704 | E15.5 * Wnt1 down vs E15.5 * Sox10 |
| 10600324 Rpl3          | NM_013762    | 7.82355e-006 | -1.1473  | E15.5 * Wnt1 down vs E15.5 * Sox10 |
| 10498519 Ssr3          | NM_026155    | 0.00181907   | -1.14781 | E15.5 * Wnt1 down vs E15.5 * Sox10 |
| 10507644 Zmynd12       | NM_001014900 | 0.00355462   | -1.14818 | E15.5 * Wnt1 down vs E15.5 * Sox10 |
| 10455801 Phax          | NM_019996    | 0.00344843   | -1.14827 | E15.5 * Wnt1 down vs E15.5 * Sox10 |
| 10347917 Rpl19         | NM_009078    | 0.000429871  | -1.14827 | E15.5 * Wnt1 down vs E15.5 * Sox10 |
| 10461108 Iscu          | NM_025526    | 0.0035087    | -1.14853 | E15.5 * Wnt1 down vs E15.5 * Sox10 |
| 10555764 Olfr585       | NM_147087    | 0.00359238   | -1.14886 | E15.5 * Wnt1 down vs E15.5 * Sox10 |
| 10536818 Calu          | NM_184053    | 0.00309783   | -1.14908 | E15.5 * Wnt1 down vs E15.5 * Sox10 |
| 10439766 Pvr13         | NM_021496    | 0.000965078  | -1.14926 | E15.5 * Wnt1 down vs E15.5 * Sox10 |
| 10393559 Timp2         | NM_011594    | 0.00143183   | -1.14966 | E15.5 * Wnt1 down vs E15.5 * Sox10 |
| 10406626 Homer1        | NM_147176    | 0.00333853   | -1.1503  | E15.5 * Wnt1 down vs E15.5 * Sox10 |
| 10477325 Dnmt3b        | NM_001003961 | 0.00455989   | -1.1508  | E15.5 * Wnt1 down vs E15.5 * Sox10 |
| 10567941 Eif3c         | NM_146200    | 0.000133962  | -1.15176 | E15.5 * Wnt1 down vs E15.5 * Sox10 |
| 10370983 Plekhj1       | NM_023900    | 0.00306291   | -1.15259 | E15.5 * Wnt1 down vs E15.5 * Sox10 |
| 10414497 Parp2         | NM_009632    | 0.00479523   | -1.15292 | E15.5 * Wnt1 down vs E15.5 * Sox10 |
| 10400795 Sav1          | NM_022028    | 0.00085266   | -1.15296 | E15.5 * Wnt1 down vs E15.5 * Sox10 |
| 10493394 Clk2          | NM_007712    | 0.000282801  | -1.15299 | E15.5 * Wnt1 down vs E15.5 * Sox10 |
| 10415065 Lrp10         | NM_022993    | 0.00239173   | -1.15334 | E15.5 * Wnt1 down vs E15.5 * Sox10 |
| 10437737 Rsl1d1        | NM_025546    | 0.000671636  | -1.15366 | E15.5 * Wnt1 down vs E15.5 * Sox10 |
| 10530163 Rfc1          | NM_011258    | 0.000603318  | -1.15413 | E15.5 * Wnt1 down vs E15.5 * Sox10 |
| 10499425 2700060E02Rik | NM_026528    | 8.93472e-005 | -1.15448 | E15.5 * Wnt1 down vs E15.5 * Sox10 |
| 10522668 Paics         | NM_025939    | 0.00231878   | -1.15453 | E15.5 * Wnt1 down vs E15.5 * Sox10 |
| 10587211 Leo1          | NM_001039522 | 0.00200398   | -1.15479 | E15.5 * Wnt1 down vs E15.5 * Sox10 |
| 10414767 Rps19         | NM_023133    | 0.00037858   | -1.15523 | E15.5 * Wnt1 down vs E15.5 * Sox10 |
| 10414874 Rps19         | NM_023133    | 0.00037858   | -1.15523 | E15.5 * Wnt1 down vs E15.5 * Sox10 |
| 10450103 H2-Ke6        | NM_013543    | 0.00436956   | -1.15613 | E15.5 * Wnt1 down vs E15.5 * Sox10 |
| 10522676 Srp72         | NM_025691    | 0.00354443   | -1.15619 | E15.5 * Wnt1 down vs E15.5 * Sox10 |
| 10455989 Rbm22         | NM_025776    | 0.00299318   | -1.15631 | E15.5 * Wnt1 down vs E15.5 * Sox10 |
| 10503109 Chchd7        | NM_181391    | 0.00145117   | -1.15681 | E15.5 * Wnt1 down vs E15.5 * Sox10 |
| 10572345 Homer3        | NM_001146153 | 0.00404122   | -1.15715 | E15.5 * Wnt1 down vs E15.5 * Sox10 |
| 10369647 Ddx50         | NM_053183    | 0.00415488   | -1.15772 | E15.5 * Wnt1 down vs E15.5 * Sox10 |
| 10428685               | ---          | 0.0011798    | -1.15854 | E15.5 * Wnt1 down vs E15.5 * Sox10 |
| 10593789 Etfa          | NM_145615    | 0.000155131  | -1.15869 | E15.5 * Wnt1 down vs E15.5 * Sox10 |
| 10478447 Stk4          | NM_021420    | 0.00112013   | -1.15884 | E15.5 * Wnt1 down vs E15.5 * Sox10 |
| 10520800 Gpn1          | NM_133756    | 0.00311988   | -1.15917 | E15.5 * Wnt1 down vs E15.5 * Sox10 |
| 10505674 Cntln         | NM_175275    | 0.000980484  | -1.15971 | E15.5 * Wnt1 down vs E15.5 * Sox10 |
| 10386171 Ndufs3        | NM_026688    | 0.00297779   | -1.15993 | E15.5 * Wnt1 down vs E15.5 * Sox10 |
| 10428052 Cct5          | NM_007637    | 1.11527e-006 | -1.16022 | E15.5 * Wnt1 down vs E15.5 * Sox10 |
| 10350838 2810417H13Rik | NM_026515    | 0.00215148   | -1.16056 | E15.5 * Wnt1 down vs E15.5 * Sox10 |
| 10469322 Vim           | NM_011701    | 0.000459635  | -1.16071 | E15.5 * Wnt1 down vs E15.5 * Sox10 |
| 10360270 Atp1a2        | NM_178405    | 0.00320738   | -1.16131 | E15.5 * Wnt1 down vs E15.5 * Sox10 |
| 10515337 Nasp          | NM_016777    | 7.94078e-005 | -1.16193 | E15.5 * Wnt1 down vs E15.5 * Sox10 |
| 10549341 4933424B01Rik | NM_138757    | 0.000261239  | -1.16294 | E15.5 * Wnt1 down vs E15.5 * Sox10 |
| 10459375 Txnl1         | NM_016792    | 0.000924745  | -1.16317 | E15.5 * Wnt1 down vs E15.5 * Sox10 |
| 10419611 Supt16h       | NM_033618    | 0.000846673  | -1.16401 | E15.5 * Wnt1 down vs E15.5 * Sox10 |
| 10538927 Amd1          | NM_009665    | 0.00407289   | -1.1641  | E15.5 * Wnt1 down vs E15.5 * Sox10 |
| 10441539 Rnaset2a      | NM_001083938 | 2.74354e-005 | -1.16423 | E15.5 * Wnt1 down vs E15.5 * Sox10 |
| 10354768 Akr1b3        | NM_009658    | 0.00259475   | -1.1644  | E15.5 * Wnt1 down vs E15.5 * Sox10 |
| 10398599 Rps19         | NM_023133    | 0.00337654   | -1.16482 | E15.5 * Wnt1 down vs E15.5 * Sox10 |
| 10394862 Ddef2         | NM_001135192 | 0.00310071   | -1.16607 | E15.5 * Wnt1 down vs E15.5 * Sox10 |
| 10363498 Ppa1          | NM_026438    | 0.00193229   | -1.16632 | E15.5 * Wnt1 down vs E15.5 * Sox10 |
| 10346074 Wdr75         | NM_028599    | 0.00127266   | -1.16635 | E15.5 * Wnt1 down vs E15.5 * Sox10 |
| 10518019 Ddi2          | NM_001017966 | 1.33209e-005 | -1.16666 | E15.5 * Wnt1 down vs E15.5 * Sox10 |

|          |               |               |              |          |                                    |
|----------|---------------|---------------|--------------|----------|------------------------------------|
| 10358717 | 1700025G04Rik | BC034723      | 0.00174348   | -1.16672 | E15.5 * Wnt1 down vs E15.5 * Sox10 |
| 10526302 | Tbl2          | NM_013763     | 0.000529     | -1.16704 | E15.5 * Wnt1 down vs E15.5 * Sox10 |
| 10543859 | Akr1b3        | NM_009658     | 0.00283075   | -1.16713 | E15.5 * Wnt1 down vs E15.5 * Sox10 |
| 10356351 | Rpl6          | NM_011290     | 5.33727e-005 | -1.16718 | E15.5 * Wnt1 down vs E15.5 * Sox10 |
| 10528332 | Napepld       | NM_178728     | 0.00333964   | -1.16751 | E15.5 * Wnt1 down vs E15.5 * Sox10 |
| 10412038 | Zswim6        | NM_145456     | 0.00134964   | -1.16764 | E15.5 * Wnt1 down vs E15.5 * Sox10 |
| 10369890 | Cisd1         | BC013522      | 0.000130366  | -1.16777 | E15.5 * Wnt1 down vs E15.5 * Sox10 |
| 10484912 | Ndufs3        | NM_026688     | 0.00412752   | -1.16788 | E15.5 * Wnt1 down vs E15.5 * Sox10 |
| 10446109 | Safb          | ENSMUST000001 | 0.000139006  | -1.1679  | E15.5 * Wnt1 down vs E15.5 * Sox10 |
| 10577070 | Tubgcp3       | NM_198031     | 0.00231185   | -1.16795 | E15.5 * Wnt1 down vs E15.5 * Sox10 |
| 10518361 | Smarca5       | NM_053124     | 0.00317046   | -1.16841 | E15.5 * Wnt1 down vs E15.5 * Sox10 |
| 10521174 | Rnf4          | NM_011278     | 0.00300358   | -1.16848 | E15.5 * Wnt1 down vs E15.5 * Sox10 |
| 10568865 | 6430531B16Rik | NM_001033465  | 0.00186683   | -1.16859 | E15.5 * Wnt1 down vs E15.5 * Sox10 |
| 10440406 | Nrip1         | NM_173440     | 0.00347736   | -1.16889 | E15.5 * Wnt1 down vs E15.5 * Sox10 |
| 10546113 | Sec61a1       | NM_016906     | 0.00119506   | -1.169   | E15.5 * Wnt1 down vs E15.5 * Sox10 |
| 10417813 | Ecd           | NM_027475     | 0.00156239   | -1.16953 | E15.5 * Wnt1 down vs E15.5 * Sox10 |
| 10582201 | Cox4nb        | NM_010926     | 0.00178402   | -1.16971 | E15.5 * Wnt1 down vs E15.5 * Sox10 |
| 10538932 | Amd1          | NM_009665     | 0.00305618   | -1.17071 | E15.5 * Wnt1 down vs E15.5 * Sox10 |
| 10510365 | Exosc10       | NM_016699     | 0.00430512   | -1.17125 | E15.5 * Wnt1 down vs E15.5 * Sox10 |
| 10440661 | Rpl13         | NM_016738     | 0.00229011   | -1.17143 | E15.5 * Wnt1 down vs E15.5 * Sox10 |
| 10478928 | Tshz2         | NM_080455     | 0.00220007   | -1.17146 | E15.5 * Wnt1 down vs E15.5 * Sox10 |
| 10522024 | Tbc1d1        | NM_019636     | 0.000467867  | -1.17154 | E15.5 * Wnt1 down vs E15.5 * Sox10 |
| 10468789 | Pdzd8         | NM_001033222  | 0.00119513   | -1.17161 | E15.5 * Wnt1 down vs E15.5 * Sox10 |
| 10506736 | Magoh         | NM_010760     | 0.00321371   | -1.17209 | E15.5 * Wnt1 down vs E15.5 * Sox10 |
| 10385236 | Akr1b3        | NM_009658     | 0.00380884   | -1.17224 | E15.5 * Wnt1 down vs E15.5 * Sox10 |
| 10369761 | Reep3         | NM_178606     | 0.00397458   | -1.17288 | E15.5 * Wnt1 down vs E15.5 * Sox10 |
| 10594754 | Foxb1         | NM_022378     | 0.0047387    | -1.17293 | E15.5 * Wnt1 down vs E15.5 * Sox10 |
| 10385034 | Rpsa          | NM_011029     | 0.000557085  | -1.17372 | E15.5 * Wnt1 down vs E15.5 * Sox10 |
| 10579874 | Abce1         | NM_015751     | 0.00190671   | -1.17387 | E15.5 * Wnt1 down vs E15.5 * Sox10 |
| 10502522 | Hs2st1        | NM_011828     | 2.60359e-005 | -1.1747  | E15.5 * Wnt1 down vs E15.5 * Sox10 |
| 10481900 | Rabepk        | NM_145522     | 0.00106477   | -1.17528 | E15.5 * Wnt1 down vs E15.5 * Sox10 |
| 10603328 | Ccdc22        | NM_138603     | 0.00358613   | -1.17572 | E15.5 * Wnt1 down vs E15.5 * Sox10 |
| 10579830 | Rbmxt         | NM_009033     | 0.000954504  | -1.17645 | E15.5 * Wnt1 down vs E15.5 * Sox10 |
| 10408952 | Nup153        | NM_175749     | 0.00432747   | -1.17694 | E15.5 * Wnt1 down vs E15.5 * Sox10 |
| 10365749 | Lta4h         | NM_008517     | 0.00276071   | -1.17724 | E15.5 * Wnt1 down vs E15.5 * Sox10 |
| 10542445 | Strap         | NM_011499     | 9.97677e-005 | -1.17735 | E15.5 * Wnt1 down vs E15.5 * Sox10 |
| 10583952 | Ncapd3        | NM_178113     | 0.00428387   | -1.17743 | E15.5 * Wnt1 down vs E15.5 * Sox10 |
| 10388971 | Utp6          | NM_144826     | 0.00150869   | -1.17744 | E15.5 * Wnt1 down vs E15.5 * Sox10 |
| 10414256 | Rbmxt         | NM_009033     | 0.000985143  | -1.17753 | E15.5 * Wnt1 down vs E15.5 * Sox10 |
| 10566333 | 9230105E10Rik | NM_001146007  | 0.00492397   | -1.1779  | E15.5 * Wnt1 down vs E15.5 * Sox10 |
| 10391762 | Gjc1          | NM_001159382  | 2.21957e-005 | -1.178   | E15.5 * Wnt1 down vs E15.5 * Sox10 |
| 10461334 | Mta2          | NM_011842     | 0.00215078   | -1.17868 | E15.5 * Wnt1 down vs E15.5 * Sox10 |
| 10525187 | Rpl6          | NM_011290     | 1.54176e-005 | -1.17881 | E15.5 * Wnt1 down vs E15.5 * Sox10 |
| 10590648 | Top2a         | NM_011623     | 0.000809827  | -1.17942 | E15.5 * Wnt1 down vs E15.5 * Sox10 |
| 10581473 | Slc7a6os      | NM_001007567  | 0.00316015   | -1.17977 | E15.5 * Wnt1 down vs E15.5 * Sox10 |
| 10406245 | ---           | ---           | 0.00197123   | -1.18002 | E15.5 * Wnt1 down vs E15.5 * Sox10 |
| 10479775 | Hspa14        | NM_015765     | 0.00333868   | -1.18084 | E15.5 * Wnt1 down vs E15.5 * Sox10 |
| 10562368 | 4931406P16Rik | NM_172741     | 0.00209699   | -1.18149 | E15.5 * Wnt1 down vs E15.5 * Sox10 |
| 10407173 | Il6st         | NM_010560     | 0.00232518   | -1.18159 | E15.5 * Wnt1 down vs E15.5 * Sox10 |
| 10455656 | Hsd17b4       | NM_008292     | 0.000442886  | -1.1818  | E15.5 * Wnt1 down vs E15.5 * Sox10 |
| 10547492 | Ccdc77        | NM_026028     | 0.00334365   | -1.18257 | E15.5 * Wnt1 down vs E15.5 * Sox10 |
| 10590808 | Yap1          | NM_009534     | 0.00393695   | -1.18291 | E15.5 * Wnt1 down vs E15.5 * Sox10 |
| 10415662 | Rcctb1        | NM_027764     | 0.000853377  | -1.18293 | E15.5 * Wnt1 down vs E15.5 * Sox10 |
| 10402795 | Cdca4         | NM_028023     | 0.00424995   | -1.18298 | E15.5 * Wnt1 down vs E15.5 * Sox10 |
| 10573637 | Phkb          | NM_199446     | 0.00274439   | -1.18307 | E15.5 * Wnt1 down vs E15.5 * Sox10 |
| 10404578 | Cdyl          | NM_009881     | 0.0045194    | -1.18405 | E15.5 * Wnt1 down vs E15.5 * Sox10 |
| 10394892 | Cpsf3         | NM_018813     | 0.000521263  | -1.18417 | E15.5 * Wnt1 down vs E15.5 * Sox10 |
| 10572932 | Nat5          | NM_001141965  | 0.00390291   | -1.18463 | E15.5 * Wnt1 down vs E15.5 * Sox10 |
| 10583942 | Thyn1         | NM_144543     | 0.00171688   | -1.18465 | E15.5 * Wnt1 down vs E15.5 * Sox10 |
| 10478341 | Ift52         | NM_172150     | 0.00166982   | -1.1848  | E15.5 * Wnt1 down vs E15.5 * Sox10 |
| 10359097 | Tor1aip1      | NM_144791     | 0.00379095   | -1.18487 | E15.5 * Wnt1 down vs E15.5 * Sox10 |
| 10487930 | Pcna          | NM_011045     | 7.2862e-006  | -1.18519 | E15.5 * Wnt1 down vs E15.5 * Sox10 |
| 10423346 | Zfp622        | NM_144523     | 0.00271655   | -1.18537 | E15.5 * Wnt1 down vs E15.5 * Sox10 |
| 10539177 | Eif4a3        | NM_138669     | 0.000141856  | -1.18547 | E15.5 * Wnt1 down vs E15.5 * Sox10 |
| 10377319 | Myh10         | NM_175260     | 0.00179079   | -1.18547 | E15.5 * Wnt1 down vs E15.5 * Sox10 |
| 10456579 | Mex3c         | NM_001039214  | 0.0018586    | -1.18549 | E15.5 * Wnt1 down vs E15.5 * Sox10 |

|                        |              |              |          |                                    |
|------------------------|--------------|--------------|----------|------------------------------------|
| 10368670 Amd1          | NM_009665    | 9.78975e-005 | -1.18577 | E15.5 * Wnt1 down vs E15.5 * Sox10 |
| 10379564 Lig3          | NM_010716    | 0.00462819   | -1.18612 | E15.5 * Wnt1 down vs E15.5 * Sox10 |
| 10603289 Clcn5         | NM_016691    | 0.00135475   | -1.18613 | E15.5 * Wnt1 down vs E15.5 * Sox10 |
| 10579969 Zfp330        | NM_145600    | 0.000400227  | -1.18617 | E15.5 * Wnt1 down vs E15.5 * Sox10 |
| 10525718 Arl6ip4       | NM_144509    | 0.000513259  | -1.18675 | E15.5 * Wnt1 down vs E15.5 * Sox10 |
| 10446207 Clpp          | NM_017393    | 0.00200959   | -1.18682 | E15.5 * Wnt1 down vs E15.5 * Sox10 |
| 10594835 Grin1a        | NM_178602    | 0.000301431  | -1.18711 | E15.5 * Wnt1 down vs E15.5 * Sox10 |
| 10352562 Gpatch2       | NM_026367    | 0.00342053   | -1.18724 | E15.5 * Wnt1 down vs E15.5 * Sox10 |
| 10461391 Pcna          | NM_011045    | 3.76626e-006 | -1.18765 | E15.5 * Wnt1 down vs E15.5 * Sox10 |
| 10429972 Cpsf1         | NM_053193    | 0.000493115  | -1.18794 | E15.5 * Wnt1 down vs E15.5 * Sox10 |
| 10558090 Tacc2         | NM_001004468 | 0.00355117   | -1.18795 | E15.5 * Wnt1 down vs E15.5 * Sox10 |
| 10473322 Cwc22         | NM_030560    | 0.00095719   | -1.18806 | E15.5 * Wnt1 down vs E15.5 * Sox10 |
| 10473325 Cwc22         | NM_030560    | 0.00095719   | -1.18806 | E15.5 * Wnt1 down vs E15.5 * Sox10 |
| 10473328 Cwc22         | NM_030560    | 0.00095719   | -1.18806 | E15.5 * Wnt1 down vs E15.5 * Sox10 |
| 10473331 Cwc22         | NM_030560    | 0.00095719   | -1.18806 | E15.5 * Wnt1 down vs E15.5 * Sox10 |
| 10473334 Cwc22         | NM_030560    | 0.00095719   | -1.18806 | E15.5 * Wnt1 down vs E15.5 * Sox10 |
| 10473337 Cwc22         | NM_030560    | 0.00095719   | -1.18806 | E15.5 * Wnt1 down vs E15.5 * Sox10 |
| 10473340 Cwc22         | NM_030560    | 0.00095719   | -1.18806 | E15.5 * Wnt1 down vs E15.5 * Sox10 |
| 10582981 Tfdp1         | NM_009361    | 0.00467979   | -1.18816 | E15.5 * Wnt1 down vs E15.5 * Sox10 |
| 10416588 1300010F03Rik | NM_027906    | 0.000683335  | -1.18819 | E15.5 * Wnt1 down vs E15.5 * Sox10 |
| 10434643 Psmb3         | NM_011971    | 0.00301035   | -1.18821 | E15.5 * Wnt1 down vs E15.5 * Sox10 |
| 10419296 Wdhd1         | NM_172598    | 0.00121556   | -1.18856 | E15.5 * Wnt1 down vs E15.5 * Sox10 |
| 10542397 H2afj         | NM_177688    | 0.000266723  | -1.18863 | E15.5 * Wnt1 down vs E15.5 * Sox10 |
| 10574962 Nfatc3        | NM_010901    | 0.000392121  | -1.18869 | E15.5 * Wnt1 down vs E15.5 * Sox10 |
| 10514000 Mpdz          | NM_010820    | 0.00163978   | -1.18959 | E15.5 * Wnt1 down vs E15.5 * Sox10 |
| 10421046 Dock5         | NM_177780    | 0.000805283  | -1.18969 | E15.5 * Wnt1 down vs E15.5 * Sox10 |
| 10482824 Acvr1         | NM_001110204 | 0.000379044  | -1.18995 | E15.5 * Wnt1 down vs E15.5 * Sox10 |
| 10578019 Nudc          | NM_010948    | 0.00198161   | -1.19005 | E15.5 * Wnt1 down vs E15.5 * Sox10 |
| 10448004 Phf10         | NM_024250    | 6.20409e-005 | -1.19013 | E15.5 * Wnt1 down vs E15.5 * Sox10 |
| 10532937 Unc119b       | NM_175352    | 0.00474961   | -1.19035 | E15.5 * Wnt1 down vs E15.5 * Sox10 |
| 10523529 Cops4         | NM_012001    | 0.00039308   | -1.1908  | E15.5 * Wnt1 down vs E15.5 * Sox10 |
| 10569429 Cdkn1c        | NM_009876    | 0.000164376  | -1.19106 | E15.5 * Wnt1 down vs E15.5 * Sox10 |
| 10571288 Gtf2e2        | NM_026584    | 0.000897744  | -1.19123 | E15.5 * Wnt1 down vs E15.5 * Sox10 |
| 10590383 Deb1          | NM_026794    | 0.00464678   | -1.19124 | E15.5 * Wnt1 down vs E15.5 * Sox10 |
| 10438959 Lsg1          | NM_178069    | 0.00395726   | -1.19169 | E15.5 * Wnt1 down vs E15.5 * Sox10 |
| 10570744 Defb50        | NM_199067    | 0.00249923   | -1.19176 | E15.5 * Wnt1 down vs E15.5 * Sox10 |
| 10507914 Sf3a3         | NM_029157    | 0.00358106   | -1.19194 | E15.5 * Wnt1 down vs E15.5 * Sox10 |
| 10360076 Ndufs2        | NM_153064    | 0.00435014   | -1.19311 | E15.5 * Wnt1 down vs E15.5 * Sox10 |
| 10536595 Lsm8          | NM_133939    | 0.00318928   | -1.19314 | E15.5 * Wnt1 down vs E15.5 * Sox10 |
| 10368930 1700021F05Rik | NM_026411    | 0.00162145   | -1.19323 | E15.5 * Wnt1 down vs E15.5 * Sox10 |
| 10585249 Ppp2r1b       | NM_001034085 | 0.0029551    | -1.19336 | E15.5 * Wnt1 down vs E15.5 * Sox10 |
| 10394823               | ---          | 0.00370346   | -1.19383 | E15.5 * Wnt1 down vs E15.5 * Sox10 |
| 10502232 Scye1         | NM_007926    | 0.00377705   | -1.19411 | E15.5 * Wnt1 down vs E15.5 * Sox10 |
| 10445008 Lsm5          | NM_025520    | 0.00392139   | -1.19441 | E15.5 * Wnt1 down vs E15.5 * Sox10 |
| 10476775 Nat5          | NM_001141965 | 0.00417666   | -1.1948  | E15.5 * Wnt1 down vs E15.5 * Sox10 |
| 10446044 Hdgrp2        | NM_008233    | 0.00158542   | -1.19489 | E15.5 * Wnt1 down vs E15.5 * Sox10 |
| 10422854 Nup155        | NM_133227    | 0.000399244  | -1.1951  | E15.5 * Wnt1 down vs E15.5 * Sox10 |
| 10504703 AU014645      | NM_001033201 | 0.00198297   | -1.19583 | E15.5 * Wnt1 down vs E15.5 * Sox10 |
| 10371888 Tmpo          | NM_001080129 | 0.00201271   | -1.19586 | E15.5 * Wnt1 down vs E15.5 * Sox10 |
| 10605421 Mtcp1         | NM_001039373 | 0.000785233  | -1.19623 | E15.5 * Wnt1 down vs E15.5 * Sox10 |
| 10417070 Ipo5          | NM_023579    | 6.62702e-007 | -1.19636 | E15.5 * Wnt1 down vs E15.5 * Sox10 |
| 10488482 Acss1         | NM_080575    | 0.00311116   | -1.19654 | E15.5 * Wnt1 down vs E15.5 * Sox10 |
| 10478594 Ctsa          | NM_008906    | 0.000730435  | -1.19665 | E15.5 * Wnt1 down vs E15.5 * Sox10 |
| 10417664 Rpl19         | NM_009078    | 0.000339307  | -1.19677 | E15.5 * Wnt1 down vs E15.5 * Sox10 |
| 10352947 Mrpl15        | NM_025300    | 0.000195118  | -1.19701 | E15.5 * Wnt1 down vs E15.5 * Sox10 |
| 10377380 1500010J02Rik | NR_026565    | 0.00178576   | -1.19799 | E15.5 * Wnt1 down vs E15.5 * Sox10 |
| 10496715 Znhit6        | NM_001081094 | 2.1294e-005  | -1.19877 | E15.5 * Wnt1 down vs E15.5 * Sox10 |
| 10495773 Dnttip2       | NM_153806    | 0.00264024   | -1.19886 | E15.5 * Wnt1 down vs E15.5 * Sox10 |
| 10533807 Cdk2ap1       | NM_013812    | 0.00099617   | -1.19897 | E15.5 * Wnt1 down vs E15.5 * Sox10 |
| 10455578 CommD10       | NM_178377    | 0.00405681   | -1.19925 | E15.5 * Wnt1 down vs E15.5 * Sox10 |
| 10500103 Gabpb2        | NM_029885    | 0.000154987  | -1.19932 | E15.5 * Wnt1 down vs E15.5 * Sox10 |
| 10471072 Tor1b         | NM_133673    | 0.000727691  | -1.20017 | E15.5 * Wnt1 down vs E15.5 * Sox10 |
| 10568859 Ndufab1       | NM_028177    | 0.00356053   | -1.20022 | E15.5 * Wnt1 down vs E15.5 * Sox10 |
| 10367843 Utrn          | NM_011682    | 0.00304489   | -1.20049 | E15.5 * Wnt1 down vs E15.5 * Sox10 |
| 10437748 Gspt1         | NM_146066    | 3.10494e-005 | -1.2005  | E15.5 * Wnt1 down vs E15.5 * Sox10 |
| 10536376 Mios          | NM_145374    | 0.00421176   | -1.20153 | E15.5 * Wnt1 down vs E15.5 * Sox10 |

|          |               |              |              |          |                                    |
|----------|---------------|--------------|--------------|----------|------------------------------------|
| 10557793 | Stx4a         | NM_009294    | 0.00341206   | -1.20158 | E15.5 * Wnt1 down vs E15.5 * Sox10 |
| 10344939 | Terf1         | NM_009352    | 0.000535689  | -1.20169 | E15.5 * Wnt1 down vs E15.5 * Sox10 |
| 10541067 | Eif4a3        | NM_138669    | 3.00661e-005 | -1.20202 | E15.5 * Wnt1 down vs E15.5 * Sox10 |
| 10580986 | Rbmxt         | NM_009033    | 0.00335688   | -1.20217 | E15.5 * Wnt1 down vs E15.5 * Sox10 |
| 10593492 | Zc3h12c       | AK220416     | 0.000906101  | -1.20218 | E15.5 * Wnt1 down vs E15.5 * Sox10 |
| 10518726 | Slc25a33      | NM_027460    | 0.00336472   | -1.2025  | E15.5 * Wnt1 down vs E15.5 * Sox10 |
| 10474437 | Ccdc34        | NM_026613    | 0.00206582   | -1.20261 | E15.5 * Wnt1 down vs E15.5 * Sox10 |
| 10433910 | Top3b         | NM_011624    | 0.00140057   | -1.20264 | E15.5 * Wnt1 down vs E15.5 * Sox10 |
| 10499639 | Cks1b         | NM_016904    | 0.00018793   | -1.20267 | E15.5 * Wnt1 down vs E15.5 * Sox10 |
| 10381668 | Nmt1          | NM_008707    | 0.000631501  | -1.20283 | E15.5 * Wnt1 down vs E15.5 * Sox10 |
| 10499705 | Hax1          | NM_011826    | 0.0011875    | -1.20288 | E15.5 * Wnt1 down vs E15.5 * Sox10 |
| 10475199 | Snap23        | NM_009222    | 0.00327746   | -1.20319 | E15.5 * Wnt1 down vs E15.5 * Sox10 |
| 10476276 | Mavs          | NM_144888    | 0.00192717   | -1.20335 | E15.5 * Wnt1 down vs E15.5 * Sox10 |
| 10402715 | Bag5          | NM_027404    | 0.00368055   | -1.20338 | E15.5 * Wnt1 down vs E15.5 * Sox10 |
| 10433639 | Mkl2          | NM_153588    | 0.00027325   | -1.20351 | E15.5 * Wnt1 down vs E15.5 * Sox10 |
| 10372668 | Mdm2          | NM_010786    | 0.00473931   | -1.20371 | E15.5 * Wnt1 down vs E15.5 * Sox10 |
| 10447675 | Rnaset2a      | NM_001083938 | 2.5138e-005  | -1.20371 | E15.5 * Wnt1 down vs E15.5 * Sox10 |
| 10462791 | March5        | NM_027314    | 0.00174572   | -1.20408 | E15.5 * Wnt1 down vs E15.5 * Sox10 |
| 10414333 | Samd4         | NM_001037221 | 0.00343214   | -1.20419 | E15.5 * Wnt1 down vs E15.5 * Sox10 |
| 10411646 | Gtf2h2        | NM_022011    | 0.00117162   | -1.20419 | E15.5 * Wnt1 down vs E15.5 * Sox10 |
| 10360848 | Mosc2         | NM_133684    | 0.000230233  | -1.20422 | E15.5 * Wnt1 down vs E15.5 * Sox10 |
| 10496796 | Ssx2ip        | NM_138744    | 0.00435296   | -1.20446 | E15.5 * Wnt1 down vs E15.5 * Sox10 |
| 10520010 | Pmpcb         | NM_028431    | 2.4787e-005  | -1.2045  | E15.5 * Wnt1 down vs E15.5 * Sox10 |
| 10555550 | Clpb          | NM_009191    | 0.0011266    | -1.20476 | E15.5 * Wnt1 down vs E15.5 * Sox10 |
| 10453082 | Hnrpl         | NM_144802    | 0.000108295  | -1.20501 | E15.5 * Wnt1 down vs E15.5 * Sox10 |
| 10533858 | Eif2b1        | NM_145371    | 0.000429545  | -1.20512 | E15.5 * Wnt1 down vs E15.5 * Sox10 |
| 10537292 | 1810058l24Rik | ENSMUST00000 | 0.00327404   | -1.20521 | E15.5 * Wnt1 down vs E15.5 * Sox10 |
| 10606689 | Timm8a1       | NM_013898    | 0.000478012  | -1.20521 | E15.5 * Wnt1 down vs E15.5 * Sox10 |
| 10473650 | Nup160        | NM_021512    | 0.00070853   | -1.20527 | E15.5 * Wnt1 down vs E15.5 * Sox10 |
| 10400762 | Map4k5        | NM_201519    | 0.00171739   | -1.20556 | E15.5 * Wnt1 down vs E15.5 * Sox10 |
| 10355037 | Wdr12         | NM_021312    | 0.00218413   | -1.20559 | E15.5 * Wnt1 down vs E15.5 * Sox10 |
| 10388613 | Ccdc55        | NM_001012309 | 0.000889414  | -1.20561 | E15.5 * Wnt1 down vs E15.5 * Sox10 |
| 10360003 | Dusp12        | NM_023173    | 0.00144034   | -1.20567 | E15.5 * Wnt1 down vs E15.5 * Sox10 |
| 10390059 | Xylt2         | NM_145828    | 0.00294891   | -1.20596 | E15.5 * Wnt1 down vs E15.5 * Sox10 |
| 10438308 | Ranbp1        | NM_011239    | 7.41783e-005 | -1.20663 | E15.5 * Wnt1 down vs E15.5 * Sox10 |
| 10435821 | Nat13         | NM_028108    | 1.53315e-005 | -1.20699 | E15.5 * Wnt1 down vs E15.5 * Sox10 |
| 10451372 | Ptk7          | NM_175168    | 0.000392283  | -1.20778 | E15.5 * Wnt1 down vs E15.5 * Sox10 |
| 10565794 | Serpinh1      | NM_009825    | 0.00214733   | -1.2078  | E15.5 * Wnt1 down vs E15.5 * Sox10 |
| 10556005 | Ilk           | NM_010562    | 0.00131778   | -1.2078  | E15.5 * Wnt1 down vs E15.5 * Sox10 |
| 10537246 | Nup205        | NM_027513    | 3.81017e-005 | -1.20856 | E15.5 * Wnt1 down vs E15.5 * Sox10 |
| 10562500 | Dpy19l3       | NM_178704    | 5.16482e-005 | -1.20864 | E15.5 * Wnt1 down vs E15.5 * Sox10 |
| 10478938 | Hax1          | NM_011826    | 0.000232253  | -1.20879 | E15.5 * Wnt1 down vs E15.5 * Sox10 |
| 10550102 | Lig1          | NM_001083188 | 0.00225233   | -1.20918 | E15.5 * Wnt1 down vs E15.5 * Sox10 |
| 10465783 | Tmem179b      | NM_026325    | 0.0011161    | -1.20954 | E15.5 * Wnt1 down vs E15.5 * Sox10 |
| 10386058 | Sparc         | NM_009242    | 0.000340317  | -1.20974 | E15.5 * Wnt1 down vs E15.5 * Sox10 |
| 10384123 | Ddx56         | NM_026538    | 0.00272636   | -1.20978 | E15.5 * Wnt1 down vs E15.5 * Sox10 |
| 10457587 | Zfp521        | NM_145492    | 0.00152398   | -1.20982 | E15.5 * Wnt1 down vs E15.5 * Sox10 |
| 10470322 | Surf2         | NM_013678    | 0.00129819   | -1.20984 | E15.5 * Wnt1 down vs E15.5 * Sox10 |
| 10573430 | Gadd45gip1    | NM_183358    | 0.00100899   | -1.21006 | E15.5 * Wnt1 down vs E15.5 * Sox10 |
| 10455813 | Lmnbl         | NM_010721    | 0.000555226  | -1.21049 | E15.5 * Wnt1 down vs E15.5 * Sox10 |
| 10366186 | Ccdc59        | NM_025602    | 0.00408472   | -1.21073 | E15.5 * Wnt1 down vs E15.5 * Sox10 |
| 10364744 | Ndufs7        | NM_029272    | 0.00433905   | -1.21098 | E15.5 * Wnt1 down vs E15.5 * Sox10 |
| 10591369 | Dnmt1         | NM_010066    | 0.00024651   | -1.21107 | E15.5 * Wnt1 down vs E15.5 * Sox10 |
| 10524150 | Ankle2        | NM_027922    | 0.00166291   | -1.21109 | E15.5 * Wnt1 down vs E15.5 * Sox10 |
| 10520842 | Bre           | NM_181279    | 0.00391101   | -1.21109 | E15.5 * Wnt1 down vs E15.5 * Sox10 |
| 10346340 | 9430016H08Rik | BC071241     | 0.00429186   | -1.21111 | E15.5 * Wnt1 down vs E15.5 * Sox10 |
| 10458213 | Etf1          | NM_144866    | 0.000189444  | -1.21145 | E15.5 * Wnt1 down vs E15.5 * Sox10 |
| 10354432 | Myo1b         | NM_010863    | 6.70785e-005 | -1.21161 | E15.5 * Wnt1 down vs E15.5 * Sox10 |
| 10549594 | Ttyh1         | NM_021324    | 0.0040578    | -1.21167 | E15.5 * Wnt1 down vs E15.5 * Sox10 |
| 10590253 | Rpsa          | NM_011029    | 0.00114424   | -1.21194 | E15.5 * Wnt1 down vs E15.5 * Sox10 |
| 10438753 | Leprel1       | NM_173379    | 0.00104656   | -1.21221 | E15.5 * Wnt1 down vs E15.5 * Sox10 |
| 10539080 | St3gal5       | NM_011375    | 0.000831984  | -1.21276 | E15.5 * Wnt1 down vs E15.5 * Sox10 |
| 10350489 | Uchl5         | NM_019562    | 8.72337e-005 | -1.21277 | E15.5 * Wnt1 down vs E15.5 * Sox10 |
| 10356657 | Ndufa10       | NM_024197    | 0.000170728  | -1.2131  | E15.5 * Wnt1 down vs E15.5 * Sox10 |
| 10391625 | Ubt1          | NM_011551    | 0.0030292    | -1.21317 | E15.5 * Wnt1 down vs E15.5 * Sox10 |
| 10582778 | ---           | ---          | 0.00139346   | -1.21324 | E15.5 * Wnt1 down vs E15.5 * Sox10 |

|                        |              |              |          |                                    |
|------------------------|--------------|--------------|----------|------------------------------------|
| 10558914 Rplp2         | NM_026020    | 0.00100322   | -1.21334 | E15.5 * Wnt1 down vs E15.5 * Sox10 |
| 10512499 Tpm2          | NM_009416    | 0.00307032   | -1.214   | E15.5 * Wnt1 down vs E15.5 * Sox10 |
| 10383799 Tcn2          | NM_015749    | 0.00353647   | -1.2142  | E15.5 * Wnt1 down vs E15.5 * Sox10 |
| 10453006 Cebpz         | NM_001024806 | 0.000616984  | -1.21428 | E15.5 * Wnt1 down vs E15.5 * Sox10 |
| 10561356 Psmc4         | NM_011874    | 0.00290164   | -1.21439 | E15.5 * Wnt1 down vs E15.5 * Sox10 |
| 10463799 EG329070      | ENSMUST00000 | 0.00138348   | -1.21453 | E15.5 * Wnt1 down vs E15.5 * Sox10 |
| 10494060 Mrpl9         | NM_030116    | 0.00293267   | -1.21483 | E15.5 * Wnt1 down vs E15.5 * Sox10 |
| 10382200 Ccdc46        | NM_029606    | 0.00272967   | -1.21551 | E15.5 * Wnt1 down vs E15.5 * Sox10 |
| 10597920 Zdhhc3        | NM_026917    | 0.000147502  | -1.21552 | E15.5 * Wnt1 down vs E15.5 * Sox10 |
| 10386548 Pabpc4        | NM_130881    | 0.0016084    | -1.21598 | E15.5 * Wnt1 down vs E15.5 * Sox10 |
| 10512935 Amd1          | NM_009665    | 0.000901965  | -1.21608 | E15.5 * Wnt1 down vs E15.5 * Sox10 |
| 10405094 lars          | NM_172015    | 0.000104597  | -1.2163  | E15.5 * Wnt1 down vs E15.5 * Sox10 |
| 10529425 Nop14         | NM_029278    | 0.000181998  | -1.21654 | E15.5 * Wnt1 down vs E15.5 * Sox10 |
| 10446693 Wdr43         | AK129031     | 7.18617e-005 | -1.21658 | E15.5 * Wnt1 down vs E15.5 * Sox10 |
| 10485225 Ext2          | NM_010163    | 0.00374922   | -1.2167  | E15.5 * Wnt1 down vs E15.5 * Sox10 |
| 10358816 Lamc1         | NM_010683    | 0.00444079   | -1.21706 | E15.5 * Wnt1 down vs E15.5 * Sox10 |
| 10396919 4933426M11Rik | BC040401     | 0.000713347  | -1.21706 | E15.5 * Wnt1 down vs E15.5 * Sox10 |
| 10522009 Pgm1          | NM_025700    | 0.00249015   | -1.2172  | E15.5 * Wnt1 down vs E15.5 * Sox10 |
| 10345230 Rab23         | NM_008999    | 0.00300001   | -1.21735 | E15.5 * Wnt1 down vs E15.5 * Sox10 |
| 10403511 Heatr1        | NM_144835    | 9.52709e-005 | -1.21755 | E15.5 * Wnt1 down vs E15.5 * Sox10 |
| 10385495 Cdk2ap1       | NM_013812    | 0.000567214  | -1.2176  | E15.5 * Wnt1 down vs E15.5 * Sox10 |
| 10414522 Apex1         | NM_009687    | 0.000154018  | -1.2183  | E15.5 * Wnt1 down vs E15.5 * Sox10 |
| 10564527 Nr2f2         | NM_009697    | 0.00193628   | -1.21864 | E15.5 * Wnt1 down vs E15.5 * Sox10 |
| 10353032 Rpa3          | NM_026632    | 0.00418964   | -1.21869 | E15.5 * Wnt1 down vs E15.5 * Sox10 |
| 10375485               | ---          | 0.00197001   | -1.21888 | E15.5 * Wnt1 down vs E15.5 * Sox10 |
| 10491385 Actl6a        | NM_019673    | 0.00148809   | -1.219   | E15.5 * Wnt1 down vs E15.5 * Sox10 |
| 10529741 Rab28         | NM_027295    | 0.000782122  | -1.21903 | E15.5 * Wnt1 down vs E15.5 * Sox10 |
| 10389245 Tada2l        | NM_172562    | 0.00151753   | -1.2192  | E15.5 * Wnt1 down vs E15.5 * Sox10 |
| 10593856 C230081A13Rik | NM_172924    | 0.00444597   | -1.21956 | E15.5 * Wnt1 down vs E15.5 * Sox10 |
| 10386543 Pabpc4        | NM_130881    | 0.000798456  | -1.22009 | E15.5 * Wnt1 down vs E15.5 * Sox10 |
| 10368748 Amd1          | NM_009665    | 0.00015849   | -1.22018 | E15.5 * Wnt1 down vs E15.5 * Sox10 |
| 10461214 Tmem223       | NM_025791    | 0.00439541   | -1.22021 | E15.5 * Wnt1 down vs E15.5 * Sox10 |
| 10440840 1110004E09Rik | BC019533     | 0.00148482   | -1.22033 | E15.5 * Wnt1 down vs E15.5 * Sox10 |
| 10430811 Nhp2l1        | NM_011482    | 0.000552056  | -1.22046 | E15.5 * Wnt1 down vs E15.5 * Sox10 |
| 10564713 Mfge8         | NM_008594    | 0.00106579   | -1.22069 | E15.5 * Wnt1 down vs E15.5 * Sox10 |
| 10540738 Fancd2        | NM_001033244 | 0.00462232   | -1.22118 | E15.5 * Wnt1 down vs E15.5 * Sox10 |
| 10581940 Kars          | NM_001130868 | 0.00218148   | -1.22205 | E15.5 * Wnt1 down vs E15.5 * Sox10 |
| 10586405 Spg21         | NM_138584    | 0.00302897   | -1.22244 | E15.5 * Wnt1 down vs E15.5 * Sox10 |
| 10379953 4632419122Rik | BC067002     | 0.000990786  | -1.22267 | E15.5 * Wnt1 down vs E15.5 * Sox10 |
| 10563583 Saal1         | NM_030233    | 0.00195689   | -1.2227  | E15.5 * Wnt1 down vs E15.5 * Sox10 |
| 10505931 Ift74         | NM_026319    | 0.00445154   | -1.22339 | E15.5 * Wnt1 down vs E15.5 * Sox10 |
| 10434348 Eif2b5        | NM_172265    | 0.00473351   | -1.2237  | E15.5 * Wnt1 down vs E15.5 * Sox10 |
| 10472240 Tanc1         | NM_198294    | 0.000758675  | -1.22383 | E15.5 * Wnt1 down vs E15.5 * Sox10 |
| 10541482 Nhp2l1        | NM_011482    | 0.00124226   | -1.22408 | E15.5 * Wnt1 down vs E15.5 * Sox10 |
| 10359648 Scyl3         | NM_028776    | 6.36925e-005 | -1.22458 | E15.5 * Wnt1 down vs E15.5 * Sox10 |
| 10445688 Ccnd3         | NM_001081636 | 0.00289663   | -1.22476 | E15.5 * Wnt1 down vs E15.5 * Sox10 |
| 10537102 Exoc4         | NM_009148    | 0.00203594   | -1.22482 | E15.5 * Wnt1 down vs E15.5 * Sox10 |
| 10394821 LOC677565     | XR_034928    | 0.000846739  | -1.2249  | E15.5 * Wnt1 down vs E15.5 * Sox10 |
| 10429081 Snrpc         | NM_011432    | 0.00193989   | -1.22507 | E15.5 * Wnt1 down vs E15.5 * Sox10 |
| 10347460 Tll4          | NM_001014974 | 4.56673e-005 | -1.22527 | E15.5 * Wnt1 down vs E15.5 * Sox10 |
| 10474671 Spred1        | NM_033524    | 0.00306671   | -1.22538 | E15.5 * Wnt1 down vs E15.5 * Sox10 |
| 10473414 Ssrp1         | NM_182990    | 0.000285177  | -1.22551 | E15.5 * Wnt1 down vs E15.5 * Sox10 |
| 10377215 Gas7          | NM_008088    | 0.00086503   | -1.22562 | E15.5 * Wnt1 down vs E15.5 * Sox10 |
| 10382565 Mrps7         | NM_025305    | 0.000131765  | -1.22571 | E15.5 * Wnt1 down vs E15.5 * Sox10 |
| 10595529 4922501C03Rik | NM_199316    | 0.00222757   | -1.22621 | E15.5 * Wnt1 down vs E15.5 * Sox10 |
| 10543213 B630005N14Rik | NM_175312    | 0.00259229   | -1.22622 | E15.5 * Wnt1 down vs E15.5 * Sox10 |
| 10444800 Nhp2l1        | NM_011482    | 0.000703337  | -1.22631 | E15.5 * Wnt1 down vs E15.5 * Sox10 |
| 10558847 Phrf1         | NM_001081118 | 0.00291575   | -1.2264  | E15.5 * Wnt1 down vs E15.5 * Sox10 |
| 10352709 Nsl1          | NM_198654    | 0.00318787   | -1.22647 | E15.5 * Wnt1 down vs E15.5 * Sox10 |
| 10349316 Tmem185b      | NM_146103    | 0.00375515   | -1.22686 | E15.5 * Wnt1 down vs E15.5 * Sox10 |
| 10456383 Impa2         | NM_053261    | 0.00082172   | -1.22701 | E15.5 * Wnt1 down vs E15.5 * Sox10 |
| 10509965 Epha2         | NM_010139    | 0.000411939  | -1.22716 | E15.5 * Wnt1 down vs E15.5 * Sox10 |
| 10517463 Luzp1         | BC137786     | 0.00022811   | -1.22717 | E15.5 * Wnt1 down vs E15.5 * Sox10 |
| 10531428 Nup54         | NM_183392    | 0.00497171   | -1.22722 | E15.5 * Wnt1 down vs E15.5 * Sox10 |
| 10575102 Cirh1a        | NM_011574    | 0.00449795   | -1.22724 | E15.5 * Wnt1 down vs E15.5 * Sox10 |
| 10588243 Ryk           | NM_013649    | 0.000655564  | -1.22735 | E15.5 * Wnt1 down vs E15.5 * Sox10 |

|          |               |              |              |          |                                    |
|----------|---------------|--------------|--------------|----------|------------------------------------|
| 10581327 | E130303B06Rik | BC052498     | 0.00349393   | -1.22757 | E15.5 * Wnt1 down vs E15.5 * Sox10 |
| 10585091 | Nhp2l1        | NM_011482    | 0.000607339  | -1.22767 | E15.5 * Wnt1 down vs E15.5 * Sox10 |
| 10554800 | Rab38         | NM_028238    | 0.000138784  | -1.22783 | E15.5 * Wnt1 down vs E15.5 * Sox10 |
| 10356800 | Hdlbp         | NM_133808    | 8.95967e-007 | -1.22786 | E15.5 * Wnt1 down vs E15.5 * Sox10 |
| 10556169 | Eif3f         | NM_025344    | 0.000308992  | -1.22807 | E15.5 * Wnt1 down vs E15.5 * Sox10 |
| 10502257 | Gstcd         | NM_026231    | 0.000544818  | -1.22811 | E15.5 * Wnt1 down vs E15.5 * Sox10 |
| 10459905 | Setbp1        | NM_053099    | 0.00496671   | -1.22814 | E15.5 * Wnt1 down vs E15.5 * Sox10 |
| 10459389 | Amd1          | NM_009665    | 0.000356586  | -1.22887 | E15.5 * Wnt1 down vs E15.5 * Sox10 |
| 10556571 | Rpl19         | NM_009078    | 0.000162108  | -1.22893 | E15.5 * Wnt1 down vs E15.5 * Sox10 |
| 10451434 | Ppp2r5d       | NM_009358    | 0.00165503   | -1.22923 | E15.5 * Wnt1 down vs E15.5 * Sox10 |
| 10544501 | Ezh2          | NM_007971    | 4.96768e-005 | -1.22924 | E15.5 * Wnt1 down vs E15.5 * Sox10 |
| 10425226 | Eif3l         | NM_145139    | 5.96804e-005 | -1.22967 | E15.5 * Wnt1 down vs E15.5 * Sox10 |
| 10395277 | Sypl          | NM_013635    | 0.000777263  | -1.22968 | E15.5 * Wnt1 down vs E15.5 * Sox10 |
| 10393408 | Tmc6          | NM_145439    | 0.00158213   | -1.22999 | E15.5 * Wnt1 down vs E15.5 * Sox10 |
| 10377681 | Dullard       | NM_026017    | 0.00156212   | -1.23018 | E15.5 * Wnt1 down vs E15.5 * Sox10 |
| 10402585 | Wars          | NM_011710    | 0.00336586   | -1.2302  | E15.5 * Wnt1 down vs E15.5 * Sox10 |
| 10435489 | Ccdc58        | NM_198645    | 0.000153879  | -1.23027 | E15.5 * Wnt1 down vs E15.5 * Sox10 |
| 10436519 | Robo1         | NM_019413    | 0.00208192   | -1.23046 | E15.5 * Wnt1 down vs E15.5 * Sox10 |
| 10421917 | Pabpc4        | NM_148917    | 0.00375239   | -1.23099 | E15.5 * Wnt1 down vs E15.5 * Sox10 |
| 10394392 | Nfyc          | NM_008692    | 0.000432145  | -1.23107 | E15.5 * Wnt1 down vs E15.5 * Sox10 |
| 10422962 | 1110020G09Rik | NM_001085410 | 0.0005113    | -1.2311  | E15.5 * Wnt1 down vs E15.5 * Sox10 |
| 10508036 | Snip1         | NM_175246    | 0.00294002   | -1.23115 | E15.5 * Wnt1 down vs E15.5 * Sox10 |
| 10513397 | 1110054O05Rik | NM_001013577 | 0.000208106  | -1.23136 | E15.5 * Wnt1 down vs E15.5 * Sox10 |
| 10499394 | Lmna          | NM_001002011 | 0.00234035   | -1.23158 | E15.5 * Wnt1 down vs E15.5 * Sox10 |
| 10384782 | Vrk2          | NM_027260    | 0.00361912   | -1.2316  | E15.5 * Wnt1 down vs E15.5 * Sox10 |
| 10385903 | Pdlim4        | NM_019417    | 0.0037623    | -1.23166 | E15.5 * Wnt1 down vs E15.5 * Sox10 |
| 10603151 | Gpm6b         | NM_023122    | 0.00137326   | -1.23187 | E15.5 * Wnt1 down vs E15.5 * Sox10 |
| 10429387 | Ptplb         | NM_023587    | 0.00494259   | -1.23189 | E15.5 * Wnt1 down vs E15.5 * Sox10 |
| 10604763 | Arpc1b        | NM_023142    | 0.00267959   | -1.23234 | E15.5 * Wnt1 down vs E15.5 * Sox10 |
| 10421309 | Slc39a14      | NM_001135151 | 0.00225705   | -1.23239 | E15.5 * Wnt1 down vs E15.5 * Sox10 |
| 10365716 | 1200009F10Rik | NM_026166    | 0.00236448   | -1.23248 | E15.5 * Wnt1 down vs E15.5 * Sox10 |
| 10412921 | Nid2          | NM_008695    | 0.000955644  | -1.23258 | E15.5 * Wnt1 down vs E15.5 * Sox10 |
| 10374880 | Mtif2         | NM_133767    | 0.00466181   | -1.23269 | E15.5 * Wnt1 down vs E15.5 * Sox10 |
| 10367931 | Ltv1          | NM_181470    | 0.00374753   | -1.23285 | E15.5 * Wnt1 down vs E15.5 * Sox10 |
| 10434758 | St6gal1       | NM_145933    | 0.000967643  | -1.23288 | E15.5 * Wnt1 down vs E15.5 * Sox10 |
| 10492480 | Gfm1          | NM_138591    | 0.000820193  | -1.23298 | E15.5 * Wnt1 down vs E15.5 * Sox10 |
| 10348180 | Eif4e2        | NM_001039169 | 0.00142704   | -1.23315 | E15.5 * Wnt1 down vs E15.5 * Sox10 |
| 10408212 | Hist1h1e      | NM_015787    | 0.00168766   | -1.23318 | E15.5 * Wnt1 down vs E15.5 * Sox10 |
| 10535502 | Jtv1          | NM_146165    | 0.00465314   | -1.2333  | E15.5 * Wnt1 down vs E15.5 * Sox10 |
| 10452709 | Ndc80         | NM_023294    | 0.00438609   | -1.23333 | E15.5 * Wnt1 down vs E15.5 * Sox10 |
| 10386125 | Gemin5        | NM_172558    | 0.0043134    | -1.23354 | E15.5 * Wnt1 down vs E15.5 * Sox10 |
| 10487577 | Ckap2l        | NM_181589    | 0.00463901   | -1.23362 | E15.5 * Wnt1 down vs E15.5 * Sox10 |
| 10450814 | Ppp1r11       | NM_029632    | 0.000886488  | -1.23363 | E15.5 * Wnt1 down vs E15.5 * Sox10 |
| 10364251 | Pofut2        | NM_030262    | 0.00193959   | -1.2338  | E15.5 * Wnt1 down vs E15.5 * Sox10 |
| 10504518 | Polr1e        | NM_022811    | 0.000835791  | -1.23386 | E15.5 * Wnt1 down vs E15.5 * Sox10 |
| 10423825 | Fzd6          | NM_008056    | 0.000164077  | -1.23409 | E15.5 * Wnt1 down vs E15.5 * Sox10 |
| 10375501 | ---           | ---          | 0.00279585   | -1.23414 | E15.5 * Wnt1 down vs E15.5 * Sox10 |
| 10492682 | 1110032E23Rik | NM_133187    | 3.54071e-005 | -1.23419 | E15.5 * Wnt1 down vs E15.5 * Sox10 |
| 10358668 | Hmcn1         | NM_001024720 | 0.00319838   | -1.23424 | E15.5 * Wnt1 down vs E15.5 * Sox10 |
| 10372082 | Nudt4         | NM_027722    | 0.000823861  | -1.23437 | E15.5 * Wnt1 down vs E15.5 * Sox10 |
| 10449163 | Pigq          | NM_011822    | 0.000854487  | -1.23493 | E15.5 * Wnt1 down vs E15.5 * Sox10 |
| 10503315 | E130016E03Rik | NM_001039556 | 0.00465788   | -1.23493 | E15.5 * Wnt1 down vs E15.5 * Sox10 |
| 10525733 | Setd8         | NM_030241    | 0.000626071  | -1.23507 | E15.5 * Wnt1 down vs E15.5 * Sox10 |
| 10425632 | Xrcc6         | NM_010247    | 0.00159837   | -1.2351  | E15.5 * Wnt1 down vs E15.5 * Sox10 |
| 10466000 | Tmem138       | NM_028411    | 0.00172347   | -1.23553 | E15.5 * Wnt1 down vs E15.5 * Sox10 |
| 10366038 | Galnt4        | NM_015737    | 0.000660334  | -1.2357  | E15.5 * Wnt1 down vs E15.5 * Sox10 |
| 10516640 | Eif3i         | NM_018799    | 0.000370895  | -1.23573 | E15.5 * Wnt1 down vs E15.5 * Sox10 |
| 10367728 | Map3k7ip2     | NM_138667    | 0.00111786   | -1.23591 | E15.5 * Wnt1 down vs E15.5 * Sox10 |
| 10559270 | Tssc4         | NM_020285    | 0.000525729  | -1.23593 | E15.5 * Wnt1 down vs E15.5 * Sox10 |
| 10362581 | Tube1         | NM_028006    | 0.00189286   | -1.23595 | E15.5 * Wnt1 down vs E15.5 * Sox10 |
| 10579776 | Arhgap10      | NM_030113    | 0.000832483  | -1.23649 | E15.5 * Wnt1 down vs E15.5 * Sox10 |
| 10604501 | Hnrnpf        | NM_133834    | 6.59798e-006 | -1.23653 | E15.5 * Wnt1 down vs E15.5 * Sox10 |
| 10522973 | Utp3          | NM_023054    | 0.00443198   | -1.23681 | E15.5 * Wnt1 down vs E15.5 * Sox10 |
| 10368060 | ENSMUSG00000  | ENSMUST00000 | 0.000775179  | -1.237   | E15.5 * Wnt1 down vs E15.5 * Sox10 |
| 10585721 | Scamp2        | NM_022813    | 0.00492963   | -1.23715 | E15.5 * Wnt1 down vs E15.5 * Sox10 |
| 10415377 | 2610027L16Rik | NM_026403    | 0.00153706   | -1.23719 | E15.5 * Wnt1 down vs E15.5 * Sox10 |

|          |               |              |              |          |                                    |
|----------|---------------|--------------|--------------|----------|------------------------------------|
| 10511679 | Decr1         | NM_026172    | 0.00168921   | -1.23728 | E15.5 * Wnt1 down vs E15.5 * Sox10 |
| 10578690 | Neil3         | NM_146208    | 0.00229984   | -1.23773 | E15.5 * Wnt1 down vs E15.5 * Sox10 |
| 10523001 | Mobkl1a       | NM_026735    | 0.000700884  | -1.23778 | E15.5 * Wnt1 down vs E15.5 * Sox10 |
| 10347481 | Cyp27a1       | NM_024264    | 0.00164167   | -1.23794 | E15.5 * Wnt1 down vs E15.5 * Sox10 |
| 10461268 | 1810009A15Rik | BC047099     | 0.000231109  | -1.23808 | E15.5 * Wnt1 down vs E15.5 * Sox10 |
| 10499454 | Dap3          | NM_022994    | 0.00366891   | -1.23812 | E15.5 * Wnt1 down vs E15.5 * Sox10 |
| 10363545 | Neurog3       | NM_009719    | 0.00463501   | -1.23815 | E15.5 * Wnt1 down vs E15.5 * Sox10 |
| 10374706 | Pus10         | NM_028304    | 0.000379352  | -1.23842 | E15.5 * Wnt1 down vs E15.5 * Sox10 |
| 10437311 | Trap1         | NM_026508    | 0.000394393  | -1.23875 | E15.5 * Wnt1 down vs E15.5 * Sox10 |
| 10366277 | E2f7          | NM_178609    | 0.00121584   | -1.23891 | E15.5 * Wnt1 down vs E15.5 * Sox10 |
| 10603431 | Suv39h1       | NM_011514    | 0.000613187  | -1.23932 | E15.5 * Wnt1 down vs E15.5 * Sox10 |
| 10421981 | Dis3          | NM_028315    | 0.000271497  | -1.23934 | E15.5 * Wnt1 down vs E15.5 * Sox10 |
| 10504957 | Smc2          | NM_008017    | 0.000331564  | -1.23941 | E15.5 * Wnt1 down vs E15.5 * Sox10 |
| 10517336 | Clic4         | NM_013885    | 0.000169926  | -1.23957 | E15.5 * Wnt1 down vs E15.5 * Sox10 |
| 10587315 | Gsta4         | NM_010357    | 0.00439864   | -1.23967 | E15.5 * Wnt1 down vs E15.5 * Sox10 |
| 10416736 | 6720463M24Rik | NM_175265    | 0.00266443   | -1.23979 | E15.5 * Wnt1 down vs E15.5 * Sox10 |
| 10360105 | Usp21         | NM_013919    | 0.00326912   | -1.2403  | E15.5 * Wnt1 down vs E15.5 * Sox10 |
| 10455695 | Srfbp1        | NM_026040    | 0.00304497   | -1.24034 | E15.5 * Wnt1 down vs E15.5 * Sox10 |
| 10436561 | Usp25         | NM_013918    | 0.00344835   | -1.24038 | E15.5 * Wnt1 down vs E15.5 * Sox10 |
| 10492846 | Pet112l       | NM_144896    | 0.000180532  | -1.24057 | E15.5 * Wnt1 down vs E15.5 * Sox10 |
| 10602223 | Alg13         | NM_026247    | 0.000657922  | -1.24091 | E15.5 * Wnt1 down vs E15.5 * Sox10 |
| 10561837 | Zfp146        | NM_011980    | 0.00418475   | -1.24101 | E15.5 * Wnt1 down vs E15.5 * Sox10 |
| 10510464 | Lzic          | NM_026963    | 0.00185788   | -1.24129 | E15.5 * Wnt1 down vs E15.5 * Sox10 |
| 10349610 | Lgtn          | NM_001136070 | 0.000762818  | -1.24142 | E15.5 * Wnt1 down vs E15.5 * Sox10 |
| 10437970 | 2310008H04Rik | NM_146068    | 7.01922e-005 | -1.24143 | E15.5 * Wnt1 down vs E15.5 * Sox10 |
| 10424825 | Cyc1          | NM_025567    | 0.00231322   | -1.24178 | E15.5 * Wnt1 down vs E15.5 * Sox10 |
| 10588495 | Dusp7         | NM_153459    | 0.00321708   | -1.24232 | E15.5 * Wnt1 down vs E15.5 * Sox10 |
| 10488303 | Crnk1         | NM_025820    | 0.00286203   | -1.24263 | E15.5 * Wnt1 down vs E15.5 * Sox10 |
| 10492798 | Sfrp2         | NM_009144    | 0.00398714   | -1.24283 | E15.5 * Wnt1 down vs E15.5 * Sox10 |
| 10393823 | P4hb          | NM_011032    | 0.00120527   | -1.24293 | E15.5 * Wnt1 down vs E15.5 * Sox10 |
| 10447431 | Foxn2         | NM_180974    | 5.37016e-005 | -1.24305 | E15.5 * Wnt1 down vs E15.5 * Sox10 |
| 10441791 | D17Ertd663e   | ENSMUST00000 | 0.00307021   | -1.24307 | E15.5 * Wnt1 down vs E15.5 * Sox10 |
| 10451238 | Polr1c        | NM_009085    | 0.00151724   | -1.24321 | E15.5 * Wnt1 down vs E15.5 * Sox10 |
| 10492558 | Smc4          | NM_133786    | 6.96414e-005 | -1.24332 | E15.5 * Wnt1 down vs E15.5 * Sox10 |
| 10466848 | D19Bwg1357e   | NM_177474    | 1.13972e-005 | -1.24337 | E15.5 * Wnt1 down vs E15.5 * Sox10 |
| 10551803 | Zfp568        | NM_001033355 | 0.000372621  | -1.24338 | E15.5 * Wnt1 down vs E15.5 * Sox10 |
| 10461257 | Ubxn1         | NM_146093    | 0.00204219   | -1.24469 | E15.5 * Wnt1 down vs E15.5 * Sox10 |
| 10605256 | Flna          | NM_010227    | 0.00470815   | -1.24489 | E15.5 * Wnt1 down vs E15.5 * Sox10 |
| 10586184 | Tipin         | NM_025372    | 0.000133523  | -1.24499 | E15.5 * Wnt1 down vs E15.5 * Sox10 |
| 10597288 | Mlh1          | NM_026810    | 0.00122648   | -1.24509 | E15.5 * Wnt1 down vs E15.5 * Sox10 |
| 10589420 | Cdc25a        | NM_007658    | 0.000521063  | -1.24511 | E15.5 * Wnt1 down vs E15.5 * Sox10 |
| 10590549 | Exosc7        | NM_001081188 | 0.000505466  | -1.24525 | E15.5 * Wnt1 down vs E15.5 * Sox10 |
| 10406881 | Smn1          | NM_011420    | 0.000794051  | -1.24536 | E15.5 * Wnt1 down vs E15.5 * Sox10 |
| 10400642 | 1110034A24Rik | BC062898     | 0.000971957  | -1.2454  | E15.5 * Wnt1 down vs E15.5 * Sox10 |
| 10449394 | Taf11         | NM_026836    | 5.18274e-005 | -1.2454  | E15.5 * Wnt1 down vs E15.5 * Sox10 |
| 10437687 | Litaf         | NM_019980    | 8.59187e-005 | -1.24541 | E15.5 * Wnt1 down vs E15.5 * Sox10 |
| 10458804 | EG225468      | XM_911153    | 0.000955751  | -1.24579 | E15.5 * Wnt1 down vs E15.5 * Sox10 |
| 10484425 | 2700094K13Rik | NM_001033166 | 0.000227452  | -1.24587 | E15.5 * Wnt1 down vs E15.5 * Sox10 |
| 10426477 | Snrpc         | NM_011432    | 0.00052422   | -1.24598 | E15.5 * Wnt1 down vs E15.5 * Sox10 |
| 10507500 | Slc6a9        | NM_008135    | 0.00240759   | -1.24608 | E15.5 * Wnt1 down vs E15.5 * Sox10 |
| 10537184 | Cald1         | NM_145575    | 0.00265731   | -1.24615 | E15.5 * Wnt1 down vs E15.5 * Sox10 |
| 10510201 | Rex2          | NM_009051    | 0.00181233   | -1.24615 | E15.5 * Wnt1 down vs E15.5 * Sox10 |
| 10521090 | Tacc3         | NM_001040435 | 0.000211693  | -1.2463  | E15.5 * Wnt1 down vs E15.5 * Sox10 |
| 10385239 | Mat2b         | NM_134017    | 7.46882e-005 | -1.24637 | E15.5 * Wnt1 down vs E15.5 * Sox10 |
| 10457054 | Zadh2         | NM_146090    | 0.00307499   | -1.24648 | E15.5 * Wnt1 down vs E15.5 * Sox10 |
| 10583634 | Qtrt1         | NM_021888    | 0.000722937  | -1.24655 | E15.5 * Wnt1 down vs E15.5 * Sox10 |
| 10528077 | Dbf4          | NM_013726    | 0.00188534   | -1.24659 | E15.5 * Wnt1 down vs E15.5 * Sox10 |
| 10391755 | Ccdc43        | NM_025918    | 0.000514122  | -1.24702 | E15.5 * Wnt1 down vs E15.5 * Sox10 |
| 10445558 | BC048355      | NM_207161    | 0.00242247   | -1.24739 | E15.5 * Wnt1 down vs E15.5 * Sox10 |
| 10523595 | Ptpn13        | NM_011204    | 7.09318e-005 | -1.24761 | E15.5 * Wnt1 down vs E15.5 * Sox10 |
| 10520080 | Rint1         | NM_177323    | 0.000661054  | -1.24761 | E15.5 * Wnt1 down vs E15.5 * Sox10 |
| 10412559 | Slbp          | NM_009193    | 0.00202132   | -1.24785 | E15.5 * Wnt1 down vs E15.5 * Sox10 |
| 10355742 | Abcb6         | NM_023732    | 0.000871815  | -1.2479  | E15.5 * Wnt1 down vs E15.5 * Sox10 |
| 10522075 | Klhl5         | NM_175174    | 0.000357833  | -1.24791 | E15.5 * Wnt1 down vs E15.5 * Sox10 |
| 10352242 | Parp1         | NM_007415    | 0.00375763   | -1.24793 | E15.5 * Wnt1 down vs E15.5 * Sox10 |
| 10470427 | Wdr5          | NM_080848    | 0.000602088  | -1.24795 | E15.5 * Wnt1 down vs E15.5 * Sox10 |

|                        |              |              |          |                                    |
|------------------------|--------------|--------------|----------|------------------------------------|
| 10459481 Lman1         | NM_027400    | 0.00147956   | -1.24827 | E15.5 * Wnt1 down vs E15.5 * Sox10 |
| 10546834 Rad18         | NM_021385    | 0.000109473  | -1.24839 | E15.5 * Wnt1 down vs E15.5 * Sox10 |
| 10579925 Gab1          | NM_021356    | 0.000242321  | -1.24876 | E15.5 * Wnt1 down vs E15.5 * Sox10 |
| 10507557 Ebna1bp2      | NM_026932    | 0.00020031   | -1.24892 | E15.5 * Wnt1 down vs E15.5 * Sox10 |
| 10384192 Tbrg4         | NM_134011    | 8.884e-005   | -1.24908 | E15.5 * Wnt1 down vs E15.5 * Sox10 |
| 10603896 Khlh13        | NM_026167    | 0.000861867  | -1.24924 | E15.5 * Wnt1 down vs E15.5 * Sox10 |
| 10401997 Ptpn21        | NM_011877    | 0.00136555   | -1.24927 | E15.5 * Wnt1 down vs E15.5 * Sox10 |
| 10423629 Pop1          | NM_152894    | 0.00422807   | -1.24928 | E15.5 * Wnt1 down vs E15.5 * Sox10 |
| 10557450 Bola2         | NM_175103    | 0.000486285  | -1.24953 | E15.5 * Wnt1 down vs E15.5 * Sox10 |
| 10352119 Pppde1        | NM_024282    | 0.000682528  | -1.24984 | E15.5 * Wnt1 down vs E15.5 * Sox10 |
| 10375083 Stk10         | NM_009288    | 0.00109198   | -1.24992 | E15.5 * Wnt1 down vs E15.5 * Sox10 |
| 10603702 Lph           | NM_025431    | 0.000221779  | -1.25014 | E15.5 * Wnt1 down vs E15.5 * Sox10 |
| 10503659 Epha7         | NM_010141    | 9.83132e-005 | -1.25031 | E15.5 * Wnt1 down vs E15.5 * Sox10 |
| 10543835 Chchd3        | NM_025336    | 0.000720188  | -1.25097 | E15.5 * Wnt1 down vs E15.5 * Sox10 |
| 10596652 Hemk1         | NM_133984    | 0.000602564  | -1.25115 | E15.5 * Wnt1 down vs E15.5 * Sox10 |
| 10565996 Inpp1         | NM_010567    | 0.00378676   | -1.25152 | E15.5 * Wnt1 down vs E15.5 * Sox10 |
| 10368199 Myb           | NM_010848    | 0.00331676   | -1.25169 | E15.5 * Wnt1 down vs E15.5 * Sox10 |
| 10565018 Iggap1        | NM_016721    | 0.00049886   | -1.25214 | E15.5 * Wnt1 down vs E15.5 * Sox10 |
| 10502780 Lphn2         | NM_001081298 | 0.00137098   | -1.25214 | E15.5 * Wnt1 down vs E15.5 * Sox10 |
| 10468519 Smndc1        | NM_172429    | 0.00274449   | -1.25217 | E15.5 * Wnt1 down vs E15.5 * Sox10 |
| 10545379 Usp39         | NM_138592    | 0.000255884  | -1.25245 | E15.5 * Wnt1 down vs E15.5 * Sox10 |
| 10447708 Qk            | NM_021881    | 1.40246e-005 | -1.2529  | E15.5 * Wnt1 down vs E15.5 * Sox10 |
| 10375667 Rnf130        | NM_021540    | 0.00234713   | -1.25306 | E15.5 * Wnt1 down vs E15.5 * Sox10 |
| 10456727 Dym           | NM_027727    | 0.00101188   | -1.25347 | E15.5 * Wnt1 down vs E15.5 * Sox10 |
| 10420080 1810034K20Rik | NM_023397    | 0.00353104   | -1.25362 | E15.5 * Wnt1 down vs E15.5 * Sox10 |
| 10428763 Atad2         | NM_027435    | 0.00017716   | -1.2539  | E15.5 * Wnt1 down vs E15.5 * Sox10 |
| 10573401 Trmt1         | NM_198020    | 0.000969716  | -1.25397 | E15.5 * Wnt1 down vs E15.5 * Sox10 |
| 10490986 4632415L05Rik | BC023403     | 0.00249681   | -1.25411 | E15.5 * Wnt1 down vs E15.5 * Sox10 |
| 10420071 Tm9sf1        | NM_028780    | 0.000323255  | -1.25411 | E15.5 * Wnt1 down vs E15.5 * Sox10 |
| 10507218 Mknk1         | NM_021461    | 0.0036798    | -1.25413 | E15.5 * Wnt1 down vs E15.5 * Sox10 |
| 10582599 Nup133        | NM_172288    | 0.000733557  | -1.25426 | E15.5 * Wnt1 down vs E15.5 * Sox10 |
| 10488697 Plagl2        | NM_018807    | 0.000849774  | -1.25444 | E15.5 * Wnt1 down vs E15.5 * Sox10 |
| 10358656 Hmcn1         | NM_001024720 | 0.00233629   | -1.25447 | E15.5 * Wnt1 down vs E15.5 * Sox10 |
| 10478825 Ddx27         | NM_153065    | 0.000203028  | -1.25521 | E15.5 * Wnt1 down vs E15.5 * Sox10 |
| 10462346 Rcl1          | NM_021525    | 0.000132043  | -1.25586 | E15.5 * Wnt1 down vs E15.5 * Sox10 |
| 10482496 Mmadhc        | ENSMUST00000 | 0.00483971   | -1.25622 | E15.5 * Wnt1 down vs E15.5 * Sox10 |
| 10471555 Angptl2       | NM_011923    | 0.000349614  | -1.2563  | E15.5 * Wnt1 down vs E15.5 * Sox10 |
| 10503178 Chd7          | NM_001081417 | 0.00188553   | -1.25643 | E15.5 * Wnt1 down vs E15.5 * Sox10 |
| 10358676 Hmcn1         | NM_001024720 | 0.00442312   | -1.25646 | E15.5 * Wnt1 down vs E15.5 * Sox10 |
| 10596137 Srprb         | NM_009275    | 0.0015665    | -1.25678 | E15.5 * Wnt1 down vs E15.5 * Sox10 |
| 10454310 Galnt1        | NM_013814    | 0.000366514  | -1.25714 | E15.5 * Wnt1 down vs E15.5 * Sox10 |
| 10379127 Spag5         | NM_017407    | 0.000781456  | -1.25723 | E15.5 * Wnt1 down vs E15.5 * Sox10 |
| 10471191 Exosc2        | NM_144886    | 0.00246493   | -1.25733 | E15.5 * Wnt1 down vs E15.5 * Sox10 |
| 10352092 Zfp238        | NM_001012330 | 0.00255211   | -1.25776 | E15.5 * Wnt1 down vs E15.5 * Sox10 |
| 10396645 Zbtb1         | NM_178744    | 0.00400849   | -1.2578  | E15.5 * Wnt1 down vs E15.5 * Sox10 |
| 10357133               | ---          | 2.15085e-005 | -1.25799 | E15.5 * Wnt1 down vs E15.5 * Sox10 |
| 10448803 Hn1l          | NM_198937    | 0.000295761  | -1.2581  | E15.5 * Wnt1 down vs E15.5 * Sox10 |
| 10535017 Gal3st4       | NM_001033416 | 0.00160977   | -1.25823 | E15.5 * Wnt1 down vs E15.5 * Sox10 |
| 10551021 Rps19         | NM_023133    | 0.00127943   | -1.25829 | E15.5 * Wnt1 down vs E15.5 * Sox10 |
| 10439276 Fam162a       | NM_027342    | 0.00120906   | -1.2588  | E15.5 * Wnt1 down vs E15.5 * Sox10 |
| 10598994 Atp1b3        | NM_007502    | 0.000598903  | -1.25906 | E15.5 * Wnt1 down vs E15.5 * Sox10 |
| 10462796 Kif11         | NM_010615    | 0.000375392  | -1.25921 | E15.5 * Wnt1 down vs E15.5 * Sox10 |
| 10393844 Thoc4         | NM_011568    | 0.00351839   | -1.25949 | E15.5 * Wnt1 down vs E15.5 * Sox10 |
| 10424779 Cks2          | NM_025415    | 0.00051263   | -1.25952 | E15.5 * Wnt1 down vs E15.5 * Sox10 |
| 10568461 Rfwd3         | NM_146218    | 0.000693863  | -1.25965 | E15.5 * Wnt1 down vs E15.5 * Sox10 |
| 10483698 Wipf1         | NM_153138    | 0.00040396   | -1.25966 | E15.5 * Wnt1 down vs E15.5 * Sox10 |
| 10453272 Zfp3612       | NM_001001806 | 0.000357736  | -1.26015 | E15.5 * Wnt1 down vs E15.5 * Sox10 |
| 10580160 Mri1          | NM_026423    | 0.00143343   | -1.26083 | E15.5 * Wnt1 down vs E15.5 * Sox10 |
| 10514576 Kank4         | NM_172872    | 0.00455627   | -1.26091 | E15.5 * Wnt1 down vs E15.5 * Sox10 |
| 10410695 Rhobtb3       | NM_028493    | 5.60685e-005 | -1.26119 | E15.5 * Wnt1 down vs E15.5 * Sox10 |
| 10421672 120001118Rik  | NM_026177    | 0.00209697   | -1.26148 | E15.5 * Wnt1 down vs E15.5 * Sox10 |
| 10410766 Nr2f1         | NM_010151    | 0.000131703  | -1.26151 | E15.5 * Wnt1 down vs E15.5 * Sox10 |
| 10506201 Ror1          | NM_013845    | 0.00104885   | -1.26205 | E15.5 * Wnt1 down vs E15.5 * Sox10 |
| 10565486 Eed           | NM_021876    | 0.000116546  | -1.26229 | E15.5 * Wnt1 down vs E15.5 * Sox10 |
| 10377953 Kif1c         | NM_153103    | 0.000145382  | -1.26257 | E15.5 * Wnt1 down vs E15.5 * Sox10 |
| 10511113 Cdc2l1        | NM_007661    | 3.16262e-006 | -1.26265 | E15.5 * Wnt1 down vs E15.5 * Sox10 |

|          |               |              |              |          |                                    |
|----------|---------------|--------------|--------------|----------|------------------------------------|
| 10522051 | Klf3          | NM_008453    | 0.000328069  | -1.26283 | E15.5 * Wnt1 down vs E15.5 * Sox10 |
| 10505008 | Slc44a1       | NM_133891    | 6.89618e-005 | -1.2629  | E15.5 * Wnt1 down vs E15.5 * Sox10 |
| 10482172 | Zbtb26        | NM_199025    | 0.00116026   | -1.26298 | E15.5 * Wnt1 down vs E15.5 * Sox10 |
| 10521515 | Evc2          | NM_145920    | 0.00035593   | -1.26333 | E15.5 * Wnt1 down vs E15.5 * Sox10 |
| 10412267 | Itga2         | NM_008396    | 0.00337532   | -1.2637  | E15.5 * Wnt1 down vs E15.5 * Sox10 |
| 10560575 | Relb          | NM_009046    | 0.000820695  | -1.2639  | E15.5 * Wnt1 down vs E15.5 * Sox10 |
| 10487359 | Itpr1l1       | BC130218     | 4.38151e-006 | -1.26391 | E15.5 * Wnt1 down vs E15.5 * Sox10 |
| 10406434 | Mef2c         | NM_025282    | 0.000240433  | -1.26417 | E15.5 * Wnt1 down vs E15.5 * Sox10 |
| 10497173 | Pxmp3         | NM_008994    | 0.00189733   | -1.26425 | E15.5 * Wnt1 down vs E15.5 * Sox10 |
| 10376950 | Pmp22         | NM_008885    | 0.00107574   | -1.26435 | E15.5 * Wnt1 down vs E15.5 * Sox10 |
| 10575961 | Usp10         | NM_009462    | 0.00307496   | -1.26471 | E15.5 * Wnt1 down vs E15.5 * Sox10 |
| 10439936 | Nfkbiz        | NM_030612    | 0.000618039  | -1.26486 | E15.5 * Wnt1 down vs E15.5 * Sox10 |
| 10532720 | Sart3         | NM_016926    | 0.0028599    | -1.26512 | E15.5 * Wnt1 down vs E15.5 * Sox10 |
| 10446441 | Ddx11         | NM_001003919 | 0.00102807   | -1.26531 | E15.5 * Wnt1 down vs E15.5 * Sox10 |
| 10570516 | Kbtbd11       | NM_029116    | 0.000247674  | -1.26571 | E15.5 * Wnt1 down vs E15.5 * Sox10 |
| 10363512 | Sar1a         | NM_009120    | 0.000333268  | -1.26576 | E15.5 * Wnt1 down vs E15.5 * Sox10 |
| 10448307 | Tnfrsf12a     | NM_013749    | 1.42308e-005 | -1.26621 | E15.5 * Wnt1 down vs E15.5 * Sox10 |
| 10462973 | Hells         | NM_008234    | 0.00344185   | -1.26661 | E15.5 * Wnt1 down vs E15.5 * Sox10 |
| 10375382 | Clint1        | NM_001045520 | 0.000105843  | -1.26668 | E15.5 * Wnt1 down vs E15.5 * Sox10 |
| 10435714 | Tmem39a       | NM_026407    | 7.70208e-006 | -1.26672 | E15.5 * Wnt1 down vs E15.5 * Sox10 |
| 10543709 | Tmem209       | NM_178625    | 0.00249504   | -1.26691 | E15.5 * Wnt1 down vs E15.5 * Sox10 |
| 10500388 | Polr3c        | NM_028925    | 0.00256981   | -1.26742 | E15.5 * Wnt1 down vs E15.5 * Sox10 |
| 10474875 | Casc5         | NM_029617    | 0.00174517   | -1.26743 | E15.5 * Wnt1 down vs E15.5 * Sox10 |
| 10605674 | Pola1         | NM_008892    | 0.00127303   | -1.2678  | E15.5 * Wnt1 down vs E15.5 * Sox10 |
| 10548585 | Csda          | NM_139117    | 0.00247702   | -1.26793 | E15.5 * Wnt1 down vs E15.5 * Sox10 |
| 10538253 | Mpp6          | NM_019939    | 0.000666663  | -1.26804 | E15.5 * Wnt1 down vs E15.5 * Sox10 |
| 10538547 | Fkbp9         | NM_012056    | 0.00103313   | -1.26811 | E15.5 * Wnt1 down vs E15.5 * Sox10 |
| 10424909 | Hsf1          | NM_008296    | 0.00252777   | -1.26844 | E15.5 * Wnt1 down vs E15.5 * Sox10 |
| 10459576 | Cep76         | NM_001081073 | 0.00449173   | -1.26846 | E15.5 * Wnt1 down vs E15.5 * Sox10 |
| 10471608 | Cep110        | NM_012018    | 0.00023162   | -1.26852 | E15.5 * Wnt1 down vs E15.5 * Sox10 |
| 10348929 | Hnrnpf        | NM_133834    | 7.96592e-009 | -1.26868 | E15.5 * Wnt1 down vs E15.5 * Sox10 |
| 10502787 | Rpsa          | NM_011029    | 0.000998864  | -1.26872 | E15.5 * Wnt1 down vs E15.5 * Sox10 |
| 10524659 | Pop5          | NM_026398    | 0.00322062   | -1.26879 | E15.5 * Wnt1 down vs E15.5 * Sox10 |
| 10547251 | Bms1          | NM_194339    | 0.000279607  | -1.26885 | E15.5 * Wnt1 down vs E15.5 * Sox10 |
| 10384398 | Grb10         | NM_010345    | 0.00101606   | -1.26913 | E15.5 * Wnt1 down vs E15.5 * Sox10 |
| 10582814 | Tomm20        | NM_024214    | 0.000813149  | -1.26915 | E15.5 * Wnt1 down vs E15.5 * Sox10 |
| 10541104 | Hnrnpf        | NM_133834    | 4.68292e-009 | -1.26923 | E15.5 * Wnt1 down vs E15.5 * Sox10 |
| 10534075 | Psph          | NM_133900    | 0.000902029  | -1.26937 | E15.5 * Wnt1 down vs E15.5 * Sox10 |
| 10581800 | Rfwd3         | NM_146218    | 0.000395962  | -1.27034 | E15.5 * Wnt1 down vs E15.5 * Sox10 |
| 10354542 | Pms1          | NM_153556    | 0.000682886  | -1.27049 | E15.5 * Wnt1 down vs E15.5 * Sox10 |
| 10480145 | Rsu1          | NM_009105    | 0.00120887   | -1.27057 | E15.5 * Wnt1 down vs E15.5 * Sox10 |
| 10485070 | Mdk           | NM_010784    | 0.00326059   | -1.2708  | E15.5 * Wnt1 down vs E15.5 * Sox10 |
| 10578109 | Ubxn8         | NM_178648    | 0.00284507   | -1.27128 | E15.5 * Wnt1 down vs E15.5 * Sox10 |
| 10475610 | Dut           | NM_023595    | 0.000214911  | -1.27142 | E15.5 * Wnt1 down vs E15.5 * Sox10 |
| 10407811 | Hnrnpf        | NM_133834    | 3.58213e-008 | -1.27159 | E15.5 * Wnt1 down vs E15.5 * Sox10 |
| 10441107 | Psmg1         | NM_019537    | 0.00125142   | -1.27174 | E15.5 * Wnt1 down vs E15.5 * Sox10 |
| 10528915 | Tyms          | NM_021288    | 0.00132987   | -1.27195 | E15.5 * Wnt1 down vs E15.5 * Sox10 |
| 10530201 | Ugdh          | NM_009466    | 0.0028541    | -1.27236 | E15.5 * Wnt1 down vs E15.5 * Sox10 |
| 10515293 | Lph           | NM_025431    | 0.000462245  | -1.27238 | E15.5 * Wnt1 down vs E15.5 * Sox10 |
| 10601335 | 2610029G23Rik | NM_026312    | 0.00141518   | -1.27245 | E15.5 * Wnt1 down vs E15.5 * Sox10 |
| 10488589 | Fam110a       | NM_028666    | 0.00334602   | -1.27247 | E15.5 * Wnt1 down vs E15.5 * Sox10 |
| 10491962 | Foxo1         | NM_019739    | 0.000455487  | -1.27263 | E15.5 * Wnt1 down vs E15.5 * Sox10 |
| 10462632 | Kif20b        | NM_183046    | 0.000612094  | -1.27275 | E15.5 * Wnt1 down vs E15.5 * Sox10 |
| 10371307 | Nfyb          | NM_010914    | 0.00295934   | -1.27284 | E15.5 * Wnt1 down vs E15.5 * Sox10 |
| 10451363 | Srf           | NM_020493    | 0.00480219   | -1.27314 | E15.5 * Wnt1 down vs E15.5 * Sox10 |
| 10409202 | ---           | ---          | 0.000785772  | -1.27317 | E15.5 * Wnt1 down vs E15.5 * Sox10 |
| 10498284 | Wwtr1         | NM_133784    | 0.000392151  | -1.27329 | E15.5 * Wnt1 down vs E15.5 * Sox10 |
| 10444505 | Rdbp          | NM_001045864 | 9.14729e-005 | -1.27341 | E15.5 * Wnt1 down vs E15.5 * Sox10 |
| 10588137 | Dzip1l        | NM_028258    | 0.000343974  | -1.27368 | E15.5 * Wnt1 down vs E15.5 * Sox10 |
| 10477929 | 1110008F13Rik | NM_026124    | 0.000194103  | -1.27428 | E15.5 * Wnt1 down vs E15.5 * Sox10 |
| 10437934 | Rpsa          | NM_011029    | 0.000923297  | -1.27444 | E15.5 * Wnt1 down vs E15.5 * Sox10 |
| 10512443 | Stoml2        | NM_023231    | 0.00282447   | -1.27446 | E15.5 * Wnt1 down vs E15.5 * Sox10 |
| 10468722 | Gfra1         | NM_010279    | 0.00421127   | -1.27459 | E15.5 * Wnt1 down vs E15.5 * Sox10 |
| 10362922 | Atg5          | NM_053069    | 0.00107751   | -1.27468 | E15.5 * Wnt1 down vs E15.5 * Sox10 |
| 10595680 | Tbc1d2b       | NM_194334    | 0.00262263   | -1.27495 | E15.5 * Wnt1 down vs E15.5 * Sox10 |
| 10479026 | Rae1          | NM_175112    | 3.66988e-006 | -1.27522 | E15.5 * Wnt1 down vs E15.5 * Sox10 |

|          |               |               |              |          |                                    |
|----------|---------------|---------------|--------------|----------|------------------------------------|
| 10427606 | Skp2          | NM_145468     | 0.000631091  | -1.27526 | E15.5 * Wnt1 down vs E15.5 * Sox10 |
| 10516605 | Hdac1         | NM_008228     | 1.56138e-005 | -1.27526 | E15.5 * Wnt1 down vs E15.5 * Sox10 |
| 10417013 | Dnajc3        | NM_008929     | 8.69325e-006 | -1.27583 | E15.5 * Wnt1 down vs E15.5 * Sox10 |
| 10417034 | Dnajc3        | NM_008929     | 8.69325e-006 | -1.27583 | E15.5 * Wnt1 down vs E15.5 * Sox10 |
| 10351404 | Tmco1         | NM_001039483  | 0.00118865   | -1.27626 | E15.5 * Wnt1 down vs E15.5 * Sox10 |
| 10443009 | Ergic1        | NM_026170     | 0.00316994   | -1.27663 | E15.5 * Wnt1 down vs E15.5 * Sox10 |
| 10477370 | Tomm20        | NM_024214     | 0.00195378   | -1.27711 | E15.5 * Wnt1 down vs E15.5 * Sox10 |
| 10421029 | Cdca2         | NM_175384     | 5.82342e-005 | -1.27737 | E15.5 * Wnt1 down vs E15.5 * Sox10 |
| 10497920 | Ankrd50       | NM_001033198  | 0.000192865  | -1.27747 | E15.5 * Wnt1 down vs E15.5 * Sox10 |
| 10391119 | 1110036O03Rik | NM_176830     | 3.51334e-005 | -1.27768 | E15.5 * Wnt1 down vs E15.5 * Sox10 |
| 10391768 | Eftud2        | NM_011431     | 0.0017191    | -1.27777 | E15.5 * Wnt1 down vs E15.5 * Sox10 |
| 10521678 | Cd38          | NM_007646     | 0.00111573   | -1.27819 | E15.5 * Wnt1 down vs E15.5 * Sox10 |
| 10509246 | Luzp1         | NM_024452     | 2.21124e-005 | -1.27837 | E15.5 * Wnt1 down vs E15.5 * Sox10 |
| 10424400 | Myc           | NM_010849     | 0.00317579   | -1.27868 | E15.5 * Wnt1 down vs E15.5 * Sox10 |
| 10435457 | Parp9         | NM_030253     | 0.00230541   | -1.27876 | E15.5 * Wnt1 down vs E15.5 * Sox10 |
| 10512704 | Exosc3        | NM_025513     | 0.000669604  | -1.27881 | E15.5 * Wnt1 down vs E15.5 * Sox10 |
| 10504743 | Nans          | NM_053179     | 0.00419282   | -1.27892 | E15.5 * Wnt1 down vs E15.5 * Sox10 |
| 10541729 | Cdca3         | NM_013538     | 0.00185152   | -1.27925 | E15.5 * Wnt1 down vs E15.5 * Sox10 |
| 10416355 | Rcbtb2        | NM_134083     | 0.00106021   | -1.27936 | E15.5 * Wnt1 down vs E15.5 * Sox10 |
| 10556266 | Wee1          | NM_009516     | 0.00293519   | -1.27996 | E15.5 * Wnt1 down vs E15.5 * Sox10 |
| 10420877 | Esco2         | NM_028039     | 0.00429994   | -1.28012 | E15.5 * Wnt1 down vs E15.5 * Sox10 |
| 10529957 | Gpr125        | ENSMUST000001 | 0.000445545  | -1.28016 | E15.5 * Wnt1 down vs E15.5 * Sox10 |
| 10583145 | Tmem123       | NM_133739     | 0.000148103  | -1.28036 | E15.5 * Wnt1 down vs E15.5 * Sox10 |
| 10446027 | Chaf1a        | NM_013733     | 6.30873e-005 | -1.28057 | E15.5 * Wnt1 down vs E15.5 * Sox10 |
| 10476668 | Csrp2bp       | NM_181417     | 0.000150248  | -1.28071 | E15.5 * Wnt1 down vs E15.5 * Sox10 |
| 10489355 | Jph2          | ENSMUST000001 | 0.000444598  | -1.28081 | E15.5 * Wnt1 down vs E15.5 * Sox10 |
| 10477994 | Ctnnb1        | NM_025680     | 0.000378367  | -1.28086 | E15.5 * Wnt1 down vs E15.5 * Sox10 |
| 10588669 | Rassf1        | NM_019713     | 0.00466146   | -1.28087 | E15.5 * Wnt1 down vs E15.5 * Sox10 |
| 10415960 | Ints9         | NM_153414     | 0.0015465    | -1.28126 | E15.5 * Wnt1 down vs E15.5 * Sox10 |
| 10424347 | EG665565      | XM_001473789  | 0.00382943   | -1.28148 | E15.5 * Wnt1 down vs E15.5 * Sox10 |
| 10494889 | Dennd2c       | NM_177857     | 0.00129197   | -1.28164 | E15.5 * Wnt1 down vs E15.5 * Sox10 |
| 10561907 | 0610010E21Rik | NM_001033140  | 0.000133542  | -1.28199 | E15.5 * Wnt1 down vs E15.5 * Sox10 |
| 10415163 | Dhrs2         | NM_027790     | 0.00217132   | -1.28208 | E15.5 * Wnt1 down vs E15.5 * Sox10 |
| 10420596 | Tnfrsf19      | NM_013869     | 8.89516e-005 | -1.28252 | E15.5 * Wnt1 down vs E15.5 * Sox10 |
| 10564698 | Det1          | NM_029585     | 0.000616615  | -1.28287 | E15.5 * Wnt1 down vs E15.5 * Sox10 |
| 10372121 | Tmtc3         | NM_001033332  | 0.000603821  | -1.28307 | E15.5 * Wnt1 down vs E15.5 * Sox10 |
| 10447417 | Msh6          | NM_010830     | 4.01749e-005 | -1.2832  | E15.5 * Wnt1 down vs E15.5 * Sox10 |
| 10503617 | F730047E07Rik | NM_199467     | 0.00146825   | -1.28363 | E15.5 * Wnt1 down vs E15.5 * Sox10 |
| 10500295 | Plekho1       | NM_023320     | 0.000400802  | -1.28389 | E15.5 * Wnt1 down vs E15.5 * Sox10 |
| 10369252 | 10-Sep        | NM_001024911  | 0.000426028  | -1.28396 | E15.5 * Wnt1 down vs E15.5 * Sox10 |
| 10472820 | Itga6         | NM_008397     | 0.00353013   | -1.28402 | E15.5 * Wnt1 down vs E15.5 * Sox10 |
| 10403361 | Pitrm1        | NM_145131     | 7.34909e-005 | -1.28413 | E15.5 * Wnt1 down vs E15.5 * Sox10 |
| 10380689 | Cbx1          | NM_007622     | 3.64667e-006 | -1.28421 | E15.5 * Wnt1 down vs E15.5 * Sox10 |
| 10473281 | Itgav         | NM_008402     | 0.000328538  | -1.28432 | E15.5 * Wnt1 down vs E15.5 * Sox10 |
| 10479411 | Ogfr          | NM_031373     | 6.08944e-005 | -1.28435 | E15.5 * Wnt1 down vs E15.5 * Sox10 |
| 10540544 | Thumpd3       | NM_008188     | 0.000208126  | -1.2845  | E15.5 * Wnt1 down vs E15.5 * Sox10 |
| 10581547 | Nob1          | NM_026277     | 0.00221186   | -1.28472 | E15.5 * Wnt1 down vs E15.5 * Sox10 |
| 10447004 | Hdac1         | NM_008228     | 2.64556e-005 | -1.28522 | E15.5 * Wnt1 down vs E15.5 * Sox10 |
| 10465604 | Stip1         | NM_016737     | 2.7687e-005  | -1.28527 | E15.5 * Wnt1 down vs E15.5 * Sox10 |
| 10369630 | Ddx21         | NM_019553     | 0.000873983  | -1.28568 | E15.5 * Wnt1 down vs E15.5 * Sox10 |
| 10469457 | Plxdc2        | NM_026162     | 0.000108656  | -1.28591 | E15.5 * Wnt1 down vs E15.5 * Sox10 |
| 10510629 | Nol9          | NM_028727     | 0.000939971  | -1.28593 | E15.5 * Wnt1 down vs E15.5 * Sox10 |
| 10491805 | Plk4          | NM_011495     | 0.000123176  | -1.28626 | E15.5 * Wnt1 down vs E15.5 * Sox10 |
| 10382998 | Birc5         | NM_001012273  | 0.0025897    | -1.28645 | E15.5 * Wnt1 down vs E15.5 * Sox10 |
| 10582811 | Irf2bp2       | BC048951      | 0.00180624   | -1.28657 | E15.5 * Wnt1 down vs E15.5 * Sox10 |
| 10465011 | Sart1         | NM_016882     | 0.000311446  | -1.2866  | E15.5 * Wnt1 down vs E15.5 * Sox10 |
| 10414417 | Peli2         | NM_033602     | 0.00110758   | -1.28682 | E15.5 * Wnt1 down vs E15.5 * Sox10 |
| 10462195 | Kank1         | NM_181404     | 0.00182415   | -1.2871  | E15.5 * Wnt1 down vs E15.5 * Sox10 |
| 10513824 | Cdk5rap2      | NM_145990     | 6.12048e-005 | -1.28715 | E15.5 * Wnt1 down vs E15.5 * Sox10 |
| 10594251 | Kif23         | NM_024245     | 0.000239806  | -1.28717 | E15.5 * Wnt1 down vs E15.5 * Sox10 |
| 10358490 | Hmcn1         | NM_001024720  | 0.00165364   | -1.28737 | E15.5 * Wnt1 down vs E15.5 * Sox10 |
| 10502714 | Bxdc5         | NM_027371     | 2.66563e-006 | -1.28765 | E15.5 * Wnt1 down vs E15.5 * Sox10 |
| 10427035 | Nr4a1         | NM_010444     | 0.00231067   | -1.28766 | E15.5 * Wnt1 down vs E15.5 * Sox10 |
| 10546066 | Isy1          | NM_133934     | 0.000157003  | -1.28783 | E15.5 * Wnt1 down vs E15.5 * Sox10 |
| 10407742 | Actn2         | NM_033268     | 0.000107867  | -1.28793 | E15.5 * Wnt1 down vs E15.5 * Sox10 |
| 10418905 | 3110001K24Rik | NM_029389     | 0.00399755   | -1.28815 | E15.5 * Wnt1 down vs E15.5 * Sox10 |

|                        |              |              |          |                                    |
|------------------------|--------------|--------------|----------|------------------------------------|
| 10431948 Rpap3         | NM_028003    | 0.00293738   | -1.28862 | E15.5 * Wnt1 down vs E15.5 * Sox10 |
| 10495359 Clcc1         | NM_145543    | 0.000592929  | -1.28895 | E15.5 * Wnt1 down vs E15.5 * Sox10 |
| 10440929 Gart          | NM_010256    | 0.00017253   | -1.2891  | E15.5 * Wnt1 down vs E15.5 * Sox10 |
| 10490104 Aurka         | NM_011497    | 0.00108786   | -1.28929 | E15.5 * Wnt1 down vs E15.5 * Sox10 |
| 10467941 Cwf19l1       | NM_001081077 | 0.000570406  | -1.28941 | E15.5 * Wnt1 down vs E15.5 * Sox10 |
| 10460631 Rela          | NM_009045    | 0.00168723   | -1.28965 | E15.5 * Wnt1 down vs E15.5 * Sox10 |
| 10535184 Psmg3         | NM_025604    | 0.00436217   | -1.29034 | E15.5 * Wnt1 down vs E15.5 * Sox10 |
| 10548086 Rad51ap1      | NM_009013    | 0.00182699   | -1.29092 | E15.5 * Wnt1 down vs E15.5 * Sox10 |
| 10597354 Pdc6ip        | NM_011052    | 0.000135959  | -1.29093 | E15.5 * Wnt1 down vs E15.5 * Sox10 |
| 10469151 Itih5         | NM_172471    | 0.000595719  | -1.29107 | E15.5 * Wnt1 down vs E15.5 * Sox10 |
| 10563303 Bax           | NM_007527    | 0.00266635   | -1.29161 | E15.5 * Wnt1 down vs E15.5 * Sox10 |
| 10352767 Nek2          | NM_010892    | 0.00271633   | -1.29176 | E15.5 * Wnt1 down vs E15.5 * Sox10 |
| 10370013 Gstt2         | NM_010361    | 0.00297422   | -1.29179 | E15.5 * Wnt1 down vs E15.5 * Sox10 |
| 10418720 Mettl6        | NM_025907    | 0.000153561  | -1.29184 | E15.5 * Wnt1 down vs E15.5 * Sox10 |
| 10355996 Slc25a5       | NM_007451    | 0.000149333  | -1.29189 | E15.5 * Wnt1 down vs E15.5 * Sox10 |
| 10545583 Pole4         | NM_025882    | 0.00099883   | -1.29196 | E15.5 * Wnt1 down vs E15.5 * Sox10 |
| 10354832 Ppil3         | NM_027351    | 5.07129e-005 | -1.29232 | E15.5 * Wnt1 down vs E15.5 * Sox10 |
| 10436951 1190017O12Rik | NM_138743    | 0.000303547  | -1.29246 | E15.5 * Wnt1 down vs E15.5 * Sox10 |
| 10520405 Gm1040        | NM_001033457 | 0.002046     | -1.29265 | E15.5 * Wnt1 down vs E15.5 * Sox10 |
| 10356859 Dtymk         | NM_001105667 | 1.49773e-006 | -1.29313 | E15.5 * Wnt1 down vs E15.5 * Sox10 |
| 10556280 Swap70        | NM_009302    | 0.000507425  | -1.29324 | E15.5 * Wnt1 down vs E15.5 * Sox10 |
| 10573217 Ddx39         | NM_197982    | 5.83686e-005 | -1.29339 | E15.5 * Wnt1 down vs E15.5 * Sox10 |
| 10521731 Ncapg         | NM_019438    | 0.00033693   | -1.29386 | E15.5 * Wnt1 down vs E15.5 * Sox10 |
| 10469312 Pter          | NM_008961    | 0.00237652   | -1.29387 | E15.5 * Wnt1 down vs E15.5 * Sox10 |
| 10447065 Fam82a1       | NM_201361    | 0.000201385  | -1.29413 | E15.5 * Wnt1 down vs E15.5 * Sox10 |
| 10346607 Fzd7          | NM_008057    | 4.96894e-005 | -1.29423 | E15.5 * Wnt1 down vs E15.5 * Sox10 |
| 10587829 Plod2         | NM_001142916 | 0.000188009  | -1.29491 | E15.5 * Wnt1 down vs E15.5 * Sox10 |
| 10600341 Emd           | NM_007927    | 0.000670462  | -1.29497 | E15.5 * Wnt1 down vs E15.5 * Sox10 |
| 10502299 Nfkb1         | NM_008689    | 0.000635663  | -1.2951  | E15.5 * Wnt1 down vs E15.5 * Sox10 |
| 10604842               | ---          | 0.00200338   | -1.29619 | E15.5 * Wnt1 down vs E15.5 * Sox10 |
| 10459844 Haus1         | NM_146089    | 0.000369802  | -1.29632 | E15.5 * Wnt1 down vs E15.5 * Sox10 |
| 10479950 Cugbp2        | NM_001110231 | 5.60292e-005 | -1.29636 | E15.5 * Wnt1 down vs E15.5 * Sox10 |
| 10586110 Cln6          | NM_001033175 | 0.000122924  | -1.29638 | E15.5 * Wnt1 down vs E15.5 * Sox10 |
| 10390707 Top2a         | NM_011623    | 5.45026e-006 | -1.29645 | E15.5 * Wnt1 down vs E15.5 * Sox10 |
| 10405185 Cks2          | NM_025415    | 0.000419058  | -1.2969  | E15.5 * Wnt1 down vs E15.5 * Sox10 |
| 10502191 Ostc          | NM_025509    | 0.000427062  | -1.297   | E15.5 * Wnt1 down vs E15.5 * Sox10 |
| 10590494 Kif15         | NM_010620    | 0.000909109  | -1.29708 | E15.5 * Wnt1 down vs E15.5 * Sox10 |
| 10534096 Chchd2        | NM_024166    | 0.00290695   | -1.2971  | E15.5 * Wnt1 down vs E15.5 * Sox10 |
| 10515257 Rad54l        | NM_009015    | 0.00041191   | -1.29713 | E15.5 * Wnt1 down vs E15.5 * Sox10 |
| 10474105 Rag2          | NM_009020    | 0.00413744   | -1.29715 | E15.5 * Wnt1 down vs E15.5 * Sox10 |
| 10353167 Tram1         | NM_028173    | 2.87929e-007 | -1.29744 | E15.5 * Wnt1 down vs E15.5 * Sox10 |
| 10379891 Ppm1d         | NM_016910    | 0.000100196  | -1.29756 | E15.5 * Wnt1 down vs E15.5 * Sox10 |
| 10447799 Igf2r         | NM_010515    | 7.64773e-006 | -1.29805 | E15.5 * Wnt1 down vs E15.5 * Sox10 |
| 10437765 Cpped1        | NM_146067    | 0.00390063   | -1.29836 | E15.5 * Wnt1 down vs E15.5 * Sox10 |
| 10529689 Wdr1          | NM_011715    | 0.00162043   | -1.29911 | E15.5 * Wnt1 down vs E15.5 * Sox10 |
| 10392098 Ftsj3         | NM_025310    | 0.000173806  | -1.29932 | E15.5 * Wnt1 down vs E15.5 * Sox10 |
| 10514201 Haus6         | AK173206     | 0.00180791   | -1.29933 | E15.5 * Wnt1 down vs E15.5 * Sox10 |
| 10601473 Apool         | NM_026565    | 0.00249698   | -1.29937 | E15.5 * Wnt1 down vs E15.5 * Sox10 |
| 10469936 Nrarp         | NM_025980    | 0.000332366  | -1.29941 | E15.5 * Wnt1 down vs E15.5 * Sox10 |
| 10507190 4732418C07Rik | BC059213     | 0.000552331  | -1.29944 | E15.5 * Wnt1 down vs E15.5 * Sox10 |
| 10523479 Slc25a5       | NM_007451    | 0.00011628   | -1.29967 | E15.5 * Wnt1 down vs E15.5 * Sox10 |
| 10362245 Epb4.1l2      | NM_013511    | 1.3098e-006  | -1.29969 | E15.5 * Wnt1 down vs E15.5 * Sox10 |
| 10566723 Lmo1          | NM_057173    | 0.000330739  | -1.29982 | E15.5 * Wnt1 down vs E15.5 * Sox10 |
| 10391461 Brca1         | NM_009764    | 0.000380306  | -1.29995 | E15.5 * Wnt1 down vs E15.5 * Sox10 |
| 10564313 Mphosph10     | NM_026483    | 0.00102621   | -1.30053 | E15.5 * Wnt1 down vs E15.5 * Sox10 |
| 10363173 Gja1          | NM_010288    | 4.84257e-005 | -1.30069 | E15.5 * Wnt1 down vs E15.5 * Sox10 |
| 10421661 Gtf2f2        | NM_026816    | 3.68627e-005 | -1.30135 | E15.5 * Wnt1 down vs E15.5 * Sox10 |
| 10520445 Dnajb6        | NM_001037941 | 0.00342507   | -1.30173 | E15.5 * Wnt1 down vs E15.5 * Sox10 |
| 10580457 N4bp1         | BC004022     | 0.00053361   | -1.30177 | E15.5 * Wnt1 down vs E15.5 * Sox10 |
| 10384373 Figl1         | NM_021891    | 0.000569668  | -1.30179 | E15.5 * Wnt1 down vs E15.5 * Sox10 |
| 10607724 Zrsr2         | NM_178794    | 4.42118e-005 | -1.30181 | E15.5 * Wnt1 down vs E15.5 * Sox10 |
| 10440522 Adamts1       | NM_009621    | 0.00096042   | -1.30204 | E15.5 * Wnt1 down vs E15.5 * Sox10 |
| 10537770 Zyx           | NM_011777    | 0.00269362   | -1.30249 | E15.5 * Wnt1 down vs E15.5 * Sox10 |
| 10566846 Dennd5a       | NM_021494    | 6.8491e-006  | -1.30272 | E15.5 * Wnt1 down vs E15.5 * Sox10 |
| 10547177 Rassf4        | NM_178045    | 0.00250697   | -1.30289 | E15.5 * Wnt1 down vs E15.5 * Sox10 |
| 10568328 Vkorc1        | NM_178600    | 1.62876e-005 | -1.3034  | E15.5 * Wnt1 down vs E15.5 * Sox10 |

|                        |              |              |          |                                    |
|------------------------|--------------|--------------|----------|------------------------------------|
| 10558441 Mgmt          | NM_008598    | 0.000781136  | -1.30352 | E15.5 * Wnt1 down vs E15.5 * Sox10 |
| 10497209 Mrps28        | NM_025434    | 0.00234053   | -1.30374 | E15.5 * Wnt1 down vs E15.5 * Sox10 |
| 10418480 Gnl3          | NM_153547    | 0.000130833  | -1.30419 | E15.5 * Wnt1 down vs E15.5 * Sox10 |
| 10398173 Vrk1          | NM_011705    | 8.86912e-006 | -1.30423 | E15.5 * Wnt1 down vs E15.5 * Sox10 |
| 10371846 Apaf1         | NM_001042558 | 0.000106492  | -1.30431 | E15.5 * Wnt1 down vs E15.5 * Sox10 |
| 10515744 Cdc20         | NM_023223    | 0.00187759   | -1.30454 | E15.5 * Wnt1 down vs E15.5 * Sox10 |
| 10509820 Rcc2          | NM_173867    | 0.003904     | -1.30487 | E15.5 * Wnt1 down vs E15.5 * Sox10 |
| 10513622 Pole3         | NM_021498    | 0.00117513   | -1.30588 | E15.5 * Wnt1 down vs E15.5 * Sox10 |
| 10590844 9030420J04Rik | BC137891     | 0.000275029  | -1.30591 | E15.5 * Wnt1 down vs E15.5 * Sox10 |
| 10599215 Slc25a5       | NM_007451    | 5.87484e-005 | -1.30601 | E15.5 * Wnt1 down vs E15.5 * Sox10 |
| 10546805 Ddx18         | NM_025860    | 8.13238e-005 | -1.30626 | E15.5 * Wnt1 down vs E15.5 * Sox10 |
| 10538832 Mad2l1        | NM_019499    | 0.00217652   | -1.30645 | E15.5 * Wnt1 down vs E15.5 * Sox10 |
| 10541711 Phb2          | NM_007531    | 9.43856e-005 | -1.3067  | E15.5 * Wnt1 down vs E15.5 * Sox10 |
| 10539421 Mobkl1b       | NM_145571    | 0.000728536  | -1.30692 | E15.5 * Wnt1 down vs E15.5 * Sox10 |
| 10385842 Rad50         | NM_009012    | 0.00167567   | -1.30734 | E15.5 * Wnt1 down vs E15.5 * Sox10 |
| 10473250 Mrpl18        | NM_026310    | 0.00153815   | -1.30749 | E15.5 * Wnt1 down vs E15.5 * Sox10 |
| 10425461 Adsl          | NM_009634    | 5.2987e-005  | -1.3075  | E15.5 * Wnt1 down vs E15.5 * Sox10 |
| 10526217 Rfc2          | NM_020022    | 0.00233284   | -1.3075  | E15.5 * Wnt1 down vs E15.5 * Sox10 |
| 10490212 Ctsz          | NM_022325    | 3.80176e-005 | -1.30756 | E15.5 * Wnt1 down vs E15.5 * Sox10 |
| 10372687 Nup107        | NM_134010    | 1.15557e-005 | -1.30796 | E15.5 * Wnt1 down vs E15.5 * Sox10 |
| 10485361 B230118H07Rik | NM_026592    | 0.000733006  | -1.30812 | E15.5 * Wnt1 down vs E15.5 * Sox10 |
| 10485667 Dnajc24       | NM_026992    | 0.00241291   | -1.30814 | E15.5 * Wnt1 down vs E15.5 * Sox10 |
| 10456414 Psmg2         | NM_134138    | 0.000509352  | -1.30871 | E15.5 * Wnt1 down vs E15.5 * Sox10 |
| 10532954 Mlec          | NM_175403    | 0.000333006  | -1.30919 | E15.5 * Wnt1 down vs E15.5 * Sox10 |
| 10490894 E2f5          | NM_007892    | 0.00161494   | -1.30927 | E15.5 * Wnt1 down vs E15.5 * Sox10 |
| 10437040 Chaf1b        | NM_028083    | 0.00102007   | -1.30942 | E15.5 * Wnt1 down vs E15.5 * Sox10 |
| 10389816 Tom1l1        | NM_028011    | 0.00187648   | -1.30944 | E15.5 * Wnt1 down vs E15.5 * Sox10 |
| 10501608 Vcam1         | NM_011693    | 0.0018556    | -1.30983 | E15.5 * Wnt1 down vs E15.5 * Sox10 |
| 10367746 Sash1         | NM_175155    | 0.000684379  | -1.30989 | E15.5 * Wnt1 down vs E15.5 * Sox10 |
| 10532944 Mlec          | NM_175403    | 0.000168227  | -1.31009 | E15.5 * Wnt1 down vs E15.5 * Sox10 |
| 10408477 E2f3          | NM_010093    | 0.000611643  | -1.31027 | E15.5 * Wnt1 down vs E15.5 * Sox10 |
| 10445796 Al314976      | NM_207219    | 0.000275191  | -1.31042 | E15.5 * Wnt1 down vs E15.5 * Sox10 |
| 10399636 Mrto4         | NM_023536    | 0.000323787  | -1.31058 | E15.5 * Wnt1 down vs E15.5 * Sox10 |
| 10409021 Tpmt          | NM_016785    | 0.00141336   | -1.31061 | E15.5 * Wnt1 down vs E15.5 * Sox10 |
| 10394812               | ---          | 0.000100425  | -1.31082 | E15.5 * Wnt1 down vs E15.5 * Sox10 |
| 10578703 Spcs3         | NM_029701    | 1.89221e-006 | -1.31115 | E15.5 * Wnt1 down vs E15.5 * Sox10 |
| 10379511 Ccl2          | NM_011333    | 0.000287025  | -1.31125 | E15.5 * Wnt1 down vs E15.5 * Sox10 |
| 10515884 Ppih          | NM_028677    | 8.74529e-005 | -1.31138 | E15.5 * Wnt1 down vs E15.5 * Sox10 |
| 10495945 4930422G04Rik | BC030185     | 4.12203e-005 | -1.31192 | E15.5 * Wnt1 down vs E15.5 * Sox10 |
| 10591357 Eif3g         | NM_016876    | 0.000431943  | -1.31193 | E15.5 * Wnt1 down vs E15.5 * Sox10 |
| 10576873 Elavl1        | NM_010485    | 2.55252e-005 | -1.31225 | E15.5 * Wnt1 down vs E15.5 * Sox10 |
| 10503222 Chd7          | NM_001081417 | 0.00221392   | -1.31315 | E15.5 * Wnt1 down vs E15.5 * Sox10 |
| 10592593 Tecta         | NM_009347    | 0.00319083   | -1.31342 | E15.5 * Wnt1 down vs E15.5 * Sox10 |
| 10347106 Rpe           | NM_025683    | 5.34279e-005 | -1.31357 | E15.5 * Wnt1 down vs E15.5 * Sox10 |
| 10567546 Crym          | NM_016669    | 0.000939773  | -1.31377 | E15.5 * Wnt1 down vs E15.5 * Sox10 |
| 10508711 Taf12         | NM_025579    | 0.00431376   | -1.3138  | E15.5 * Wnt1 down vs E15.5 * Sox10 |
| 10572897 Hmox1         | NM_010442    | 0.00169266   | -1.31399 | E15.5 * Wnt1 down vs E15.5 * Sox10 |
| 10401136 EG230765      | XR_032827    | 0.000486638  | -1.31456 | E15.5 * Wnt1 down vs E15.5 * Sox10 |
| 10358652 Hmcn1         | NM_001024720 | 0.00270877   | -1.31486 | E15.5 * Wnt1 down vs E15.5 * Sox10 |
| 10568714 Mki67         | NM_001081117 | 2.92059e-005 | -1.31491 | E15.5 * Wnt1 down vs E15.5 * Sox10 |
| 10411306 Polk          | NM_012048    | 1.15643e-005 | -1.31492 | E15.5 * Wnt1 down vs E15.5 * Sox10 |
| 10466745 Tjp2          | NM_011597    | 0.000815287  | -1.31508 | E15.5 * Wnt1 down vs E15.5 * Sox10 |
| 10421269 Sorbs3        | NM_011366    | 0.00131673   | -1.31516 | E15.5 * Wnt1 down vs E15.5 * Sox10 |
| 10439710 Phldb2        | NM_153412    | 5.0468e-006  | -1.31533 | E15.5 * Wnt1 down vs E15.5 * Sox10 |
| 10549097 Ldhd          | NM_008492    | 3.93844e-006 | -1.3161  | E15.5 * Wnt1 down vs E15.5 * Sox10 |
| 10599880 Slitrk2       | NM_198863    | 0.00424288   | -1.31652 | E15.5 * Wnt1 down vs E15.5 * Sox10 |
| 10361767 Sf3b5         | NM_175102    | 8.20624e-005 | -1.31662 | E15.5 * Wnt1 down vs E15.5 * Sox10 |
| 10485282 Alkbh3        | NM_026944    | 0.000242527  | -1.3167  | E15.5 * Wnt1 down vs E15.5 * Sox10 |
| 10425905 Nup50         | NM_016714    | 9.08103e-006 | -1.31733 | E15.5 * Wnt1 down vs E15.5 * Sox10 |
| 10556206 Rpl27a        | AF357390     | 0.000321095  | -1.31747 | E15.5 * Wnt1 down vs E15.5 * Sox10 |
| 10352320 Tmem63a       | NM_144794    | 0.000140837  | -1.31759 | E15.5 * Wnt1 down vs E15.5 * Sox10 |
| 10471503 Taf1d         | BC110660     | 0.00430223   | -1.31764 | E15.5 * Wnt1 down vs E15.5 * Sox10 |
| 10570432 Rpl27a        | AF357390     | 0.000371635  | -1.31788 | E15.5 * Wnt1 down vs E15.5 * Sox10 |
| 10471844 Nek6          | NM_021606    | 0.00247874   | -1.31882 | E15.5 * Wnt1 down vs E15.5 * Sox10 |
| 10461452 Fen1          | NM_007999    | 0.00108393   | -1.31903 | E15.5 * Wnt1 down vs E15.5 * Sox10 |
| 10362767 Mical1        | NM_138315    | 0.00125119   | -1.31944 | E15.5 * Wnt1 down vs E15.5 * Sox10 |

|                        |              |              |          |                                    |
|------------------------|--------------|--------------|----------|------------------------------------|
| 10589041 Impdh2        | NM_011830    | 0.000161798  | -1.31989 | E15.5 * Wnt1 down vs E15.5 * Sox10 |
| 10601705 Cenpi         | NM_145924    | 0.000427335  | -1.31998 | E15.5 * Wnt1 down vs E15.5 * Sox10 |
| 10367772 Samd5         | NM_177271    | 0.000179433  | -1.32019 | E15.5 * Wnt1 down vs E15.5 * Sox10 |
| 10376060 Irf1          | NM_008390    | 0.00436677   | -1.32024 | E15.5 * Wnt1 down vs E15.5 * Sox10 |
| 10397763 9030617O03Rik | NM_145448    | 0.000954981  | -1.32031 | E15.5 * Wnt1 down vs E15.5 * Sox10 |
| 10454786 Ctnna1        | NM_009818    | 8.58993e-005 | -1.32043 | E15.5 * Wnt1 down vs E15.5 * Sox10 |
| 10496204 Cenpe         | NM_173762    | 1.43893e-005 | -1.32055 | E15.5 * Wnt1 down vs E15.5 * Sox10 |
| 10586174 ---           |              | 0.00186049   | -1.32098 | E15.5 * Wnt1 down vs E15.5 * Sox10 |
| 10408798 Tcfap2a       | NM_011547    | 0.00405785   | -1.32108 | E15.5 * Wnt1 down vs E15.5 * Sox10 |
| 10593270 Ttc12         | NM_172770    | 0.000113341  | -1.32125 | E15.5 * Wnt1 down vs E15.5 * Sox10 |
| 10503915 Chchd2        | NM_024166    | 0.00228497   | -1.32143 | E15.5 * Wnt1 down vs E15.5 * Sox10 |
| 10459590 Ptpn2         | NM_001127177 | 0.00154183   | -1.3215  | E15.5 * Wnt1 down vs E15.5 * Sox10 |
| 10353004 Cks2          | NM_025415    | 0.000193261  | -1.3219  | E15.5 * Wnt1 down vs E15.5 * Sox10 |
| 10582295 Odc1          | NM_013614    | 9.50893e-005 | -1.32206 | E15.5 * Wnt1 down vs E15.5 * Sox10 |
| 10554013 Chsy1         | NM_001081163 | 0.000405036  | -1.32269 | E15.5 * Wnt1 down vs E15.5 * Sox10 |
| 10408850 Nedd9         | NM_001111324 | 0.000102199  | -1.32327 | E15.5 * Wnt1 down vs E15.5 * Sox10 |
| 10545576 Mrpl19        | NM_026490    | 0.000735664  | -1.32343 | E15.5 * Wnt1 down vs E15.5 * Sox10 |
| 10471201 Abl1          | NM_001112703 | 0.000787104  | -1.3238  | E15.5 * Wnt1 down vs E15.5 * Sox10 |
| 10353733 Prim2         | NM_008922    | 0.00164024   | -1.32409 | E15.5 * Wnt1 down vs E15.5 * Sox10 |
| 10575120 Sntb2         | NM_009229    | 0.000108201  | -1.3248  | E15.5 * Wnt1 down vs E15.5 * Sox10 |
| 10588403 Mrpl3         | NM_053159    | 0.000157085  | -1.32511 | E15.5 * Wnt1 down vs E15.5 * Sox10 |
| 10587554 Tpbp          | NM_011627    | 0.00382754   | -1.32584 | E15.5 * Wnt1 down vs E15.5 * Sox10 |
| 10564978 Blm           | NM_007550    | 0.000259049  | -1.32585 | E15.5 * Wnt1 down vs E15.5 * Sox10 |
| 10466410 Psat1         | NM_177420    | 0.000632062  | -1.32617 | E15.5 * Wnt1 down vs E15.5 * Sox10 |
| 10492102 Spg20         | NM_144895    | 0.00376179   | -1.32648 | E15.5 * Wnt1 down vs E15.5 * Sox10 |
| 10555108 Clns1a        | NM_023671    | 1.29402e-006 | -1.3268  | E15.5 * Wnt1 down vs E15.5 * Sox10 |
| 10518453 Chchd2        | NM_024166    | 0.00295889   | -1.32752 | E15.5 * Wnt1 down vs E15.5 * Sox10 |
| 10349081 Phlpp         | BC059254     | 0.000301974  | -1.32772 | E15.5 * Wnt1 down vs E15.5 * Sox10 |
| 10478572 Ube2c         | NM_026785    | 0.00113498   | -1.3279  | E15.5 * Wnt1 down vs E15.5 * Sox10 |
| 10435305 Itgb5         | NM_001145884 | 4.51331e-005 | -1.32831 | E15.5 * Wnt1 down vs E15.5 * Sox10 |
| 10568217 Dctpp1        | NM_023203    | 0.00271986   | -1.32836 | E15.5 * Wnt1 down vs E15.5 * Sox10 |
| 10467637 Arhgap19      | NM_027667    | 0.000150637  | -1.32865 | E15.5 * Wnt1 down vs E15.5 * Sox10 |
| 10453604 Bambi         | NM_026505    | 0.000224079  | -1.32869 | E15.5 * Wnt1 down vs E15.5 * Sox10 |
| 10359161 Soat1         | NM_009230    | 8.1817e-005  | -1.32876 | E15.5 * Wnt1 down vs E15.5 * Sox10 |
| 10358654 Hmcn1         | NM_001024720 | 0.00123238   | -1.32878 | E15.5 * Wnt1 down vs E15.5 * Sox10 |
| 10511498 Plekhf2       | NM_175175    | 1.11421e-005 | -1.32891 | E15.5 * Wnt1 down vs E15.5 * Sox10 |
| 10496417 Rg9mtd2       | NM_175389    | 0.00144452   | -1.32908 | E15.5 * Wnt1 down vs E15.5 * Sox10 |
| 10358607 Hmcn1         | NM_001024720 | 0.00263247   | -1.32955 | E15.5 * Wnt1 down vs E15.5 * Sox10 |
| 10517706 Mrto4         | NM_023536    | 4.00803e-005 | -1.32963 | E15.5 * Wnt1 down vs E15.5 * Sox10 |
| 10596812 6230427J02Rik | NM_026597    | 0.000640309  | -1.33013 | E15.5 * Wnt1 down vs E15.5 * Sox10 |
| 10571344 D8Ert82e      | NM_172911    | 0.00165112   | -1.33022 | E15.5 * Wnt1 down vs E15.5 * Sox10 |
| 10365450 Pwp1          | NM_133993    | 0.000266947  | -1.33035 | E15.5 * Wnt1 down vs E15.5 * Sox10 |
| 10416510 Nufip1        | NM_013745    | 0.000772234  | -1.3308  | E15.5 * Wnt1 down vs E15.5 * Sox10 |
| 10529875 Ldb2          | NM_001077398 | 0.00393724   | -1.33162 | E15.5 * Wnt1 down vs E15.5 * Sox10 |
| 10412385 Mrps30        | NM_021556    | 0.00153226   | -1.33162 | E15.5 * Wnt1 down vs E15.5 * Sox10 |
| 10543004 Pon2          | NM_183308    | 0.000707456  | -1.33163 | E15.5 * Wnt1 down vs E15.5 * Sox10 |
| 10558325 Bccip         | NM_025392    | 6.90974e-006 | -1.33183 | E15.5 * Wnt1 down vs E15.5 * Sox10 |
| 10428103 Stk3          | NM_019635    | 6.49388e-005 | -1.33237 | E15.5 * Wnt1 down vs E15.5 * Sox10 |
| 10400805 Nin           | NM_008697    | 4.09519e-006 | -1.33252 | E15.5 * Wnt1 down vs E15.5 * Sox10 |
| 10388160 Slc13a5       | NM_001004148 | 0.000457266  | -1.333   | E15.5 * Wnt1 down vs E15.5 * Sox10 |
| 10355893 Epha4         | NM_007936    | 0.0011359    | -1.33303 | E15.5 * Wnt1 down vs E15.5 * Sox10 |
| 10503202 Chd7          | NM_001081417 | 0.00159392   | -1.33311 | E15.5 * Wnt1 down vs E15.5 * Sox10 |
| 10366026 Wdr51b        | NM_027740    | 0.00274974   | -1.33418 | E15.5 * Wnt1 down vs E15.5 * Sox10 |
| 10480714 Uap1l1        | NM_001033293 | 0.000673252  | -1.33436 | E15.5 * Wnt1 down vs E15.5 * Sox10 |
| 10358529 Hmcn1         | NM_001024720 | 0.00358274   | -1.33437 | E15.5 * Wnt1 down vs E15.5 * Sox10 |
| 10377550 Trp53         | NM_001127233 | 1.30501e-005 | -1.33456 | E15.5 * Wnt1 down vs E15.5 * Sox10 |
| 10554445 Prc1          | NM_145150    | 0.000447298  | -1.33469 | E15.5 * Wnt1 down vs E15.5 * Sox10 |
| 10427772 Tars          | NM_033074    | 0.000841573  | -1.33538 | E15.5 * Wnt1 down vs E15.5 * Sox10 |
| 10389395 Brip1         | NM_178309    | 7.86099e-005 | -1.33674 | E15.5 * Wnt1 down vs E15.5 * Sox10 |
| 10424221 Wdr67         | NM_001081396 | 0.000634395  | -1.33732 | E15.5 * Wnt1 down vs E15.5 * Sox10 |
| 10467013 Prkg1         | NM_001013833 | 0.000365049  | -1.33733 | E15.5 * Wnt1 down vs E15.5 * Sox10 |
| 10399575 ---           |              | 0.00450301   | -1.33757 | E15.5 * Wnt1 down vs E15.5 * Sox10 |
| 10545672 Mthfd2        | NM_008638    | 0.00231101   | -1.33794 | E15.5 * Wnt1 down vs E15.5 * Sox10 |
| 10473547 Srp9          | NM_012058    | 1.48564e-006 | -1.33803 | E15.5 * Wnt1 down vs E15.5 * Sox10 |
| 10427744 Rai14         | NM_030690    | 0.000274054  | -1.33953 | E15.5 * Wnt1 down vs E15.5 * Sox10 |
| 10461723 4632417K18Rik | NM_026640    | 0.00375134   | -1.33981 | E15.5 * Wnt1 down vs E15.5 * Sox10 |

|          |               |               |              |          |                                    |
|----------|---------------|---------------|--------------|----------|------------------------------------|
| 10459755 | 2810433K01Rik | NM_025581     | 6.40899e-006 | -1.34043 | E15.5 * Wnt1 down vs E15.5 * Sox10 |
| 10357436 | Mcm6          | NM_008567     | 1.044e-007   | -1.34098 | E15.5 * Wnt1 down vs E15.5 * Sox10 |
| 10389269 | Aatf          | NM_019816     | 1.72745e-005 | -1.34116 | E15.5 * Wnt1 down vs E15.5 * Sox10 |
| 10488237 | Snx5          | NM_024225     | 1.63517e-006 | -1.34136 | E15.5 * Wnt1 down vs E15.5 * Sox10 |
| 10554463 | Hddc3         | NM_026812     | 0.000105789  | -1.34139 | E15.5 * Wnt1 down vs E15.5 * Sox10 |
| 10385325 | Pttg1         | NM_013917     | 0.000950069  | -1.34191 | E15.5 * Wnt1 down vs E15.5 * Sox10 |
| 10412394 | Nnt           | NR_003544     | 0.000129227  | -1.34212 | E15.5 * Wnt1 down vs E15.5 * Sox10 |
| 10416269 | Ppp3cc        | ENSMUST000001 | 6.46927e-005 | -1.34212 | E15.5 * Wnt1 down vs E15.5 * Sox10 |
| 10579347 | Ifi30         | NM_023065     | 0.00139336   | -1.34214 | E15.5 * Wnt1 down vs E15.5 * Sox10 |
| 10554281 | Fanci         | NM_145946     | 0.000552228  | -1.34238 | E15.5 * Wnt1 down vs E15.5 * Sox10 |
| 10493692 | Rab13         | NM_026677     | 0.00096604   | -1.34242 | E15.5 * Wnt1 down vs E15.5 * Sox10 |
| 10467258 | Myof          | NM_001099634  | 0.000249743  | -1.34277 | E15.5 * Wnt1 down vs E15.5 * Sox10 |
| 10408656 | Peci          | NM_011868     | 0.00111683   | -1.343   | E15.5 * Wnt1 down vs E15.5 * Sox10 |
| 10568480 | Nsmce4a       | ENSMUST000001 | 0.00102066   | -1.34347 | E15.5 * Wnt1 down vs E15.5 * Sox10 |
| 10503206 | Chd7          | NM_001081417  | 0.00373775   | -1.3435  | E15.5 * Wnt1 down vs E15.5 * Sox10 |
| 10461921 | 2410127L17Rik | NM_026120     | 0.000980952  | -1.34368 | E15.5 * Wnt1 down vs E15.5 * Sox10 |
| 10587508 | Ttk           | NM_009445     | 5.0771e-006  | -1.34402 | E15.5 * Wnt1 down vs E15.5 * Sox10 |
| 10476362 | Mcm8          | NM_025676     | 8.26659e-005 | -1.34431 | E15.5 * Wnt1 down vs E15.5 * Sox10 |
| 10500837 | Dclre1b       | NM_133865     | 0.0016412    | -1.34484 | E15.5 * Wnt1 down vs E15.5 * Sox10 |
| 10347232 | Xrcc5         | NM_009533     | 2.05884e-005 | -1.34594 | E15.5 * Wnt1 down vs E15.5 * Sox10 |
| 10375497 | ---           | ---           | 0.00109298   | -1.34633 | E15.5 * Wnt1 down vs E15.5 * Sox10 |
| 10558454 | Glr3          | NM_023140     | 0.00133427   | -1.34639 | E15.5 * Wnt1 down vs E15.5 * Sox10 |
| 10413059 | Vcl           | NM_009502     | 0.00410377   | -1.34687 | E15.5 * Wnt1 down vs E15.5 * Sox10 |
| 10434441 | Ece2          | NM_025462     | 0.00154198   | -1.34697 | E15.5 * Wnt1 down vs E15.5 * Sox10 |
| 10440427 | D16Ertd472e   | NM_025967     | 0.00250548   | -1.347   | E15.5 * Wnt1 down vs E15.5 * Sox10 |
| 10498620 | Trim59        | NM_025863     | 0.000727526  | -1.34706 | E15.5 * Wnt1 down vs E15.5 * Sox10 |
| 10507328 | Prdx1         | NM_011034     | 0.000357657  | -1.34709 | E15.5 * Wnt1 down vs E15.5 * Sox10 |
| 10403727 | Gli3          | NM_008130     | 0.000722661  | -1.34719 | E15.5 * Wnt1 down vs E15.5 * Sox10 |
| 10379957 | Rnft1         | NM_029788     | 0.000273482  | -1.3475  | E15.5 * Wnt1 down vs E15.5 * Sox10 |
| 10520650 | Cad           | NM_023525     | 0.00127628   | -1.34751 | E15.5 * Wnt1 down vs E15.5 * Sox10 |
| 10463296 | Cutc          | NM_001113562  | 0.00106288   | -1.34798 | E15.5 * Wnt1 down vs E15.5 * Sox10 |
| 10431812 | Nell2         | NM_016743     | 0.000972499  | -1.34814 | E15.5 * Wnt1 down vs E15.5 * Sox10 |
| 10375313 | Ccnj1         | NM_001045530  | 0.00152606   | -1.34828 | E15.5 * Wnt1 down vs E15.5 * Sox10 |
| 10597461 | Cmtm7         | NM_133978     | 0.00192974   | -1.34835 | E15.5 * Wnt1 down vs E15.5 * Sox10 |
| 10514732 | Slc35d1       | NM_177732     | 0.0010218    | -1.34884 | E15.5 * Wnt1 down vs E15.5 * Sox10 |
| 10525419 | P2rx7         | NM_011027     | 1.88903e-005 | -1.3491  | E15.5 * Wnt1 down vs E15.5 * Sox10 |
| 10413710 | Nt5dc2        | NM_027289     | 0.00191239   | -1.3492  | E15.5 * Wnt1 down vs E15.5 * Sox10 |
| 10409259 | ---           | ---           | 0.00456854   | -1.34922 | E15.5 * Wnt1 down vs E15.5 * Sox10 |
| 10365288 | Taf10         | NM_020024     | 0.00165092   | -1.34925 | E15.5 * Wnt1 down vs E15.5 * Sox10 |
| 10538590 | Herc5         | ENSMUST000001 | 0.000554414  | -1.34948 | E15.5 * Wnt1 down vs E15.5 * Sox10 |
| 10413086 | Adk           | NM_134079     | 5.29918e-005 | -1.34957 | E15.5 * Wnt1 down vs E15.5 * Sox10 |
| 10358609 | Hmcn1         | NM_001024720  | 0.00467067   | -1.3498  | E15.5 * Wnt1 down vs E15.5 * Sox10 |
| 10537712 | Gstk1         | NM_029555     | 0.00147124   | -1.34989 | E15.5 * Wnt1 down vs E15.5 * Sox10 |
| 10519324 | Cdk6          | NM_009873     | 0.000194711  | -1.34994 | E15.5 * Wnt1 down vs E15.5 * Sox10 |
| 10353438 | Tram2         | NM_133252     | 0.00357277   | -1.35005 | E15.5 * Wnt1 down vs E15.5 * Sox10 |
| 10513583 | Cdc26         | NM_139291     | 3.41236e-005 | -1.35171 | E15.5 * Wnt1 down vs E15.5 * Sox10 |
| 10357870 | Prep          | NM_054077     | 2.71162e-005 | -1.352   | E15.5 * Wnt1 down vs E15.5 * Sox10 |
| 10390505 | Rpl23         | AF357384      | 0.00428195   | -1.35213 | E15.5 * Wnt1 down vs E15.5 * Sox10 |
| 10404531 | Psmg4         | NM_001101430  | 0.00376874   | -1.35235 | E15.5 * Wnt1 down vs E15.5 * Sox10 |
| 10509777 | Iffo2         | NM_183148     | 0.000680223  | -1.35239 | E15.5 * Wnt1 down vs E15.5 * Sox10 |
| 10404827 | Nol7          | NM_023554     | 0.000168014  | -1.35288 | E15.5 * Wnt1 down vs E15.5 * Sox10 |
| 10554960 | Fam181b       | NM_021427     | 0.00164704   | -1.35299 | E15.5 * Wnt1 down vs E15.5 * Sox10 |
| 10411728 | Cenph         | NM_021886     | 3.98494e-005 | -1.35385 | E15.5 * Wnt1 down vs E15.5 * Sox10 |
| 10496605 | Ccbl2         | NM_173763     | 0.00359968   | -1.35403 | E15.5 * Wnt1 down vs E15.5 * Sox10 |
| 10512949 | Abca1         | NM_013454     | 3.96239e-005 | -1.35488 | E15.5 * Wnt1 down vs E15.5 * Sox10 |
| 10407053 | 2810008M24Rik | BC004049      | 0.000132329  | -1.35526 | E15.5 * Wnt1 down vs E15.5 * Sox10 |
| 10435271 | Heg1          | NM_175256     | 2.718e-005   | -1.35556 | E15.5 * Wnt1 down vs E15.5 * Sox10 |
| 10374364 | Akt2          | NM_001110208  | 0.000806666  | -1.35582 | E15.5 * Wnt1 down vs E15.5 * Sox10 |
| 10444595 | Lsm2          | NM_030597     | 0.000887501  | -1.35627 | E15.5 * Wnt1 down vs E15.5 * Sox10 |
| 10405727 | 2410127L17Rik | NM_026120     | 0.00147483   | -1.35639 | E15.5 * Wnt1 down vs E15.5 * Sox10 |
| 10412481 | 2410127L17Rik | NM_026120     | 0.00147483   | -1.35639 | E15.5 * Wnt1 down vs E15.5 * Sox10 |
| 10542791 | Ppfbp1        | NM_026221     | 0.000198363  | -1.35661 | E15.5 * Wnt1 down vs E15.5 * Sox10 |
| 10560624 | Apoe          | NM_009696     | 0.00022038   | -1.35672 | E15.5 * Wnt1 down vs E15.5 * Sox10 |
| 10399391 | Gen1          | NM_177331     | 0.00179197   | -1.35687 | E15.5 * Wnt1 down vs E15.5 * Sox10 |
| 10359851 | Uck2          | NM_030724     | 0.000318728  | -1.35688 | E15.5 * Wnt1 down vs E15.5 * Sox10 |
| 10573583 | Man2b1        | NM_010764     | 0.000286129  | -1.35705 | E15.5 * Wnt1 down vs E15.5 * Sox10 |

|          |               |              |              |          |                                    |
|----------|---------------|--------------|--------------|----------|------------------------------------|
| 10595205 | 2410127L17Rik | NM_026120    | 0.000437374  | -1.35716 | E15.5 * Wnt1 down vs E15.5 * Sox10 |
| 10591816 | Dpy19I1       | NM_172920    | 0.00149711   | -1.35723 | E15.5 * Wnt1 down vs E15.5 * Sox10 |
| 10358637 | Hmcn1         | NM_001024720 | 0.00356678   | -1.35736 | E15.5 * Wnt1 down vs E15.5 * Sox10 |
| 10574471 | Cmtm3         | NM_024217    | 0.000188827  | -1.35796 | E15.5 * Wnt1 down vs E15.5 * Sox10 |
| 10485645 | Rcn1          | NM_009037    | 9.926e-006   | -1.35819 | E15.5 * Wnt1 down vs E15.5 * Sox10 |
| 10378088 | Mybbp1a       | NM_016776    | 0.00374465   | -1.35821 | E15.5 * Wnt1 down vs E15.5 * Sox10 |
| 10509127 | Fuca1         | NM_024243    | 0.000317446  | -1.35853 | E15.5 * Wnt1 down vs E15.5 * Sox10 |
| 10375031 | Sngrp25       | NM_030093    | 0.000318594  | -1.35873 | E15.5 * Wnt1 down vs E15.5 * Sox10 |
| 10369815 | Cdc2a         | NM_007659    | 0.000829222  | -1.35877 | E15.5 * Wnt1 down vs E15.5 * Sox10 |
| 10352267 | Lin9          | NM_001103182 | 0.000244519  | -1.35923 | E15.5 * Wnt1 down vs E15.5 * Sox10 |
| 10492428 | Tiparp        | NM_178892    | 0.000297313  | -1.3596  | E15.5 * Wnt1 down vs E15.5 * Sox10 |
| 10472782 | Hat1          | NM_026115    | 7.7171e-005  | -1.36015 | E15.5 * Wnt1 down vs E15.5 * Sox10 |
| 10394819 | LOC677565     | XR_034928    | 0.000152358  | -1.36069 | E15.5 * Wnt1 down vs E15.5 * Sox10 |
| 10357579 | Mapkapk2      | NM_008551    | 0.00222931   | -1.36085 | E15.5 * Wnt1 down vs E15.5 * Sox10 |
| 10421877 | Diap3         | NM_019670    | 1.40307e-005 | -1.36103 | E15.5 * Wnt1 down vs E15.5 * Sox10 |
| 10441706 | 1700010114Rik | NM_025851    | 0.00176535   | -1.36108 | E15.5 * Wnt1 down vs E15.5 * Sox10 |
| 10503190 | Chd7          | NM_001081417 | 0.00178298   | -1.36167 | E15.5 * Wnt1 down vs E15.5 * Sox10 |
| 10491977 | 2810046L04Rik | NM_173382    | 0.000392288  | -1.36168 | E15.5 * Wnt1 down vs E15.5 * Sox10 |
| 10465861 | Incenp        | NM_016692    | 0.000168015  | -1.36184 | E15.5 * Wnt1 down vs E15.5 * Sox10 |
| 10390050 | Eme1          | NM_177752    | 0.00233725   | -1.36212 | E15.5 * Wnt1 down vs E15.5 * Sox10 |
| 10382912 | 09-Sep        | NM_001113486 | 6.47488e-005 | -1.36238 | E15.5 * Wnt1 down vs E15.5 * Sox10 |
| 10451472 | Rpl7l1        | NM_025433    | 0.000205566  | -1.36244 | E15.5 * Wnt1 down vs E15.5 * Sox10 |
| 10472916 | Cdca7         | NM_025866    | 0.00383608   | -1.36293 | E15.5 * Wnt1 down vs E15.5 * Sox10 |
| 10492021 | Postn         | NM_015784    | 0.000376238  | -1.36295 | E15.5 * Wnt1 down vs E15.5 * Sox10 |
| 10475981 | Chchd5        | NM_025395    | 0.00139888   | -1.36351 | E15.5 * Wnt1 down vs E15.5 * Sox10 |
| 10510391 | Srm           | NM_009272    | 0.000394501  | -1.36402 | E15.5 * Wnt1 down vs E15.5 * Sox10 |
| 10554325 | 5730590G19Rik | NM_029835    | 0.00240277   | -1.36433 | E15.5 * Wnt1 down vs E15.5 * Sox10 |
| 10518408 | Plod1         | NM_011122    | 0.00352809   | -1.36435 | E15.5 * Wnt1 down vs E15.5 * Sox10 |
| 10393955 | Dus1l         | NM_026824    | 0.000353087  | -1.36474 | E15.5 * Wnt1 down vs E15.5 * Sox10 |
| 10494551 | Acp6          | NM_019800    | 0.00201153   | -1.36487 | E15.5 * Wnt1 down vs E15.5 * Sox10 |
| 10527801 | Brca2         | NM_001081001 | 0.000770024  | -1.36505 | E15.5 * Wnt1 down vs E15.5 * Sox10 |
| 10565862 | Pold3         | NM_133692    | 0.000849088  | -1.36534 | E15.5 * Wnt1 down vs E15.5 * Sox10 |
| 10464754 | Rhod          | NM_007485    | 0.00371836   | -1.36536 | E15.5 * Wnt1 down vs E15.5 * Sox10 |
| 10560408 | Psg17         | NM_007677    | 0.00482624   | -1.36561 | E15.5 * Wnt1 down vs E15.5 * Sox10 |
| 10479765 | Suv39h2       | NM_022724    | 3.10743e-006 | -1.36614 | E15.5 * Wnt1 down vs E15.5 * Sox10 |
| 10584422 | Olfr908       | NM_146872    | 0.000184642  | -1.36635 | E15.5 * Wnt1 down vs E15.5 * Sox10 |
| 10463535 | Nolc1         | NM_053086    | 1.55167e-005 | -1.36773 | E15.5 * Wnt1 down vs E15.5 * Sox10 |
| 10436456 | Prosl         | NM_011173    | 0.000794149  | -1.36777 | E15.5 * Wnt1 down vs E15.5 * Sox10 |
| 10506870 | Txndc12       | NM_025334    | 0.000526367  | -1.36778 | E15.5 * Wnt1 down vs E15.5 * Sox10 |
| 10557992 | Bag3          | NM_013863    | 0.000114913  | -1.36829 | E15.5 * Wnt1 down vs E15.5 * Sox10 |
| 10344679 | Stt18         | NM_173868    | 0.00157085   | -1.36916 | E15.5 * Wnt1 down vs E15.5 * Sox10 |
| 10408321 | Gmnn          | NM_020567    | 0.00128967   | -1.36925 | E15.5 * Wnt1 down vs E15.5 * Sox10 |
| 10566767 | St5           | NM_001001326 | 0.000659486  | -1.3693  | E15.5 * Wnt1 down vs E15.5 * Sox10 |
| 10495094 | 6530418L21Rik | BC052371     | 0.000346019  | -1.37027 | E15.5 * Wnt1 down vs E15.5 * Sox10 |
| 10415045 | Mrpl52        | NM_026851    | 0.00020024   | -1.37046 | E15.5 * Wnt1 down vs E15.5 * Sox10 |
| 10454077 | Taf4b         | NM_001100449 | 0.000176162  | -1.3705  | E15.5 * Wnt1 down vs E15.5 * Sox10 |
| 10563780 | E2f8          | NM_001013368 | 3.58604e-005 | -1.37074 | E15.5 * Wnt1 down vs E15.5 * Sox10 |
| 10573615 | Orc6l         | NM_019716    | 2.38852e-005 | -1.37101 | E15.5 * Wnt1 down vs E15.5 * Sox10 |
| 10367641 | Mthfd1l       | NM_172308    | 1.14075e-006 | -1.37138 | E15.5 * Wnt1 down vs E15.5 * Sox10 |
| 10587503 | Sh3bgrl2      | NM_172507    | 0.00144694   | -1.37149 | E15.5 * Wnt1 down vs E15.5 * Sox10 |
| 10358549 | Hmcn1         | NM_001024720 | 0.0038264    | -1.37173 | E15.5 * Wnt1 down vs E15.5 * Sox10 |
| 10415875 | 2610028A01Rik | NM_028228    | 0.00262184   | -1.37309 | E15.5 * Wnt1 down vs E15.5 * Sox10 |
| 10474769 | Bub1b         | NM_009773    | 0.000100769  | -1.3733  | E15.5 * Wnt1 down vs E15.5 * Sox10 |
| 10416215 | Loxl2         | NM_033325    | 0.00280641   | -1.37452 | E15.5 * Wnt1 down vs E15.5 * Sox10 |
| 10547015 | 1500001M20Rik | NM_026894    | 3.1326e-005  | -1.37503 | E15.5 * Wnt1 down vs E15.5 * Sox10 |
| 10521555 | Lyar          | NM_025281    | 1.30772e-006 | -1.3751  | E15.5 * Wnt1 down vs E15.5 * Sox10 |
| 10521690 | Ppih          | NM_028677    | 4.53757e-005 | -1.37565 | E15.5 * Wnt1 down vs E15.5 * Sox10 |
| 10445565 | Mrpl2         | NM_025302    | 0.000408413  | -1.37572 | E15.5 * Wnt1 down vs E15.5 * Sox10 |
| 10358733 | Rgl1          | NM_016846    | 0.000587764  | -1.376   | E15.5 * Wnt1 down vs E15.5 * Sox10 |
| 10462702 | Hectd2        | NM_172637    | 0.00323272   | -1.37606 | E15.5 * Wnt1 down vs E15.5 * Sox10 |
| 10483401 | Spc25         | NM_025565    | 8.99541e-005 | -1.37685 | E15.5 * Wnt1 down vs E15.5 * Sox10 |
| 10474619 | Fmn1          | NM_010230    | 0.0019247    | -1.37687 | E15.5 * Wnt1 down vs E15.5 * Sox10 |
| 10447589 | Fbl           | NM_007991    | 3.87757e-006 | -1.37711 | E15.5 * Wnt1 down vs E15.5 * Sox10 |
| 10525591 | Kntc1         | NM_001042421 | 2.13669e-007 | -1.37716 | E15.5 * Wnt1 down vs E15.5 * Sox10 |
| 10501629 | Cdc14a        | NM_001080818 | 6.85683e-006 | -1.37804 | E15.5 * Wnt1 down vs E15.5 * Sox10 |
| 10568668 | Adam12        | NM_007400    | 0.00119535   | -1.37869 | E15.5 * Wnt1 down vs E15.5 * Sox10 |

|                        |              |              |          |                                    |
|------------------------|--------------|--------------|----------|------------------------------------|
| 10380381 Tob1          | NM_009427    | 0.000655     | -1.37935 | E15.5 * Wnt1 down vs E15.5 * Sox10 |
| 10530421 Gabra4        | NM_010251    | 0.0004997    | -1.38014 | E15.5 * Wnt1 down vs E15.5 * Sox10 |
| 10436428 Mina          | NM_025910    | 0.000715571  | -1.38017 | E15.5 * Wnt1 down vs E15.5 * Sox10 |
| 10474984 Nusap1        | NM_133851    | 0.000843153  | -1.38025 | E15.5 * Wnt1 down vs E15.5 * Sox10 |
| 10429452 Sf3b4         | NM_153053    | 0.000358319  | -1.38095 | E15.5 * Wnt1 down vs E15.5 * Sox10 |
| 10409434 Lman2         | NM_025828    | 0.000613819  | -1.38158 | E15.5 * Wnt1 down vs E15.5 * Sox10 |
| 10351347 Creg1         | NM_011804    | 0.000479706  | -1.38184 | E15.5 * Wnt1 down vs E15.5 * Sox10 |
| 10433885 Cebpd         | NM_007679    | 0.000694284  | -1.38261 | E15.5 * Wnt1 down vs E15.5 * Sox10 |
| 10594404 Smad3         | NM_016769    | 0.000121425  | -1.38285 | E15.5 * Wnt1 down vs E15.5 * Sox10 |
| 10360934 Rrp15         | NM_026041    | 6.90529e-006 | -1.38365 | E15.5 * Wnt1 down vs E15.5 * Sox10 |
| 10360985 Cenpf         | NM_001081363 | 1.13709e-005 | -1.38403 | E15.5 * Wnt1 down vs E15.5 * Sox10 |
| 10542745 Fgfr1op2      | NM_026218    | 0.000227824  | -1.38417 | E15.5 * Wnt1 down vs E15.5 * Sox10 |
| 10453216 Thumpd2       | BC065413     | 0.000322821  | -1.38418 | E15.5 * Wnt1 down vs E15.5 * Sox10 |
| 10571142 Gpr124        | NM_054044    | 0.000405057  | -1.38466 | E15.5 * Wnt1 down vs E15.5 * Sox10 |
| 10487894 Rassf2        | NM_175445    | 0.00049229   | -1.38478 | E15.5 * Wnt1 down vs E15.5 * Sox10 |
| 10418171 Zcchc24       | NM_001101433 | 0.000108455  | -1.38496 | E15.5 * Wnt1 down vs E15.5 * Sox10 |
| 10394978 Rrm2          | NM_009104    | 1.37166e-007 | -1.38584 | E15.5 * Wnt1 down vs E15.5 * Sox10 |
| 10389005 1110002N22Rik | NM_183275    | 0.00172965   | -1.38601 | E15.5 * Wnt1 down vs E15.5 * Sox10 |
| 10359890 Nuf2          | NM_023284    | 0.00140767   | -1.38602 | E15.5 * Wnt1 down vs E15.5 * Sox10 |
| 10373814 Pes1          | NM_022889    | 0.000796853  | -1.38616 | E15.5 * Wnt1 down vs E15.5 * Sox10 |
| 10578123 Rbpms         | NM_019733    | 8.15284e-005 | -1.38624 | E15.5 * Wnt1 down vs E15.5 * Sox10 |
| 10355403 Fn1           | NM_010233    | 0.0021681    | -1.38639 | E15.5 * Wnt1 down vs E15.5 * Sox10 |
| 10447702 Ppih          | NM_028677    | 8.99354e-005 | -1.38642 | E15.5 * Wnt1 down vs E15.5 * Sox10 |
| 10584142 Ets1          | NM_011808    | 8.58437e-005 | -1.38722 | E15.5 * Wnt1 down vs E15.5 * Sox10 |
| 10553993 Snrpa1        | NM_021336    | 7.602e-007   | -1.38738 | E15.5 * Wnt1 down vs E15.5 * Sox10 |
| 10552075 Lgi4          | NM_144556    | 0.00103565   | -1.38749 | E15.5 * Wnt1 down vs E15.5 * Sox10 |
| 10446074 Uhrf1         | NM_010931    | 0.000313164  | -1.3875  | E15.5 * Wnt1 down vs E15.5 * Sox10 |
| 10497520 Ect2          | NM_007900    | 0.00365915   | -1.38761 | E15.5 * Wnt1 down vs E15.5 * Sox10 |
| 10469070 Nudt5         | NM_016918    | 0.000158834  | -1.38776 | E15.5 * Wnt1 down vs E15.5 * Sox10 |
| 10466976 Gldc          | NM_138595    | 0.000472952  | -1.38779 | E15.5 * Wnt1 down vs E15.5 * Sox10 |
| 10358523 Hmcn1         | NM_001024720 | 0.000900773  | -1.38881 | E15.5 * Wnt1 down vs E15.5 * Sox10 |
| 10573261 Asf1b         | NM_024184    | 0.000850573  | -1.38923 | E15.5 * Wnt1 down vs E15.5 * Sox10 |
| 10539135 Capg          | NM_007599    | 9.8169e-005  | -1.38993 | E15.5 * Wnt1 down vs E15.5 * Sox10 |
| 10505894 Mtap          | NM_024433    | 2.1372e-005  | -1.39047 | E15.5 * Wnt1 down vs E15.5 * Sox10 |
| 10358611 Hmcn1         | NM_001024720 | 0.0011736    | -1.39065 | E15.5 * Wnt1 down vs E15.5 * Sox10 |
| 10479811 Mcm10         | NM_027290    | 1.30437e-005 | -1.39072 | E15.5 * Wnt1 down vs E15.5 * Sox10 |
| 10477187 Tpx2          | NM_001141977 | 4.93041e-005 | -1.39077 | E15.5 * Wnt1 down vs E15.5 * Sox10 |
| 10568150 Kif22         | NM_145588    | 0.00131091   | -1.39103 | E15.5 * Wnt1 down vs E15.5 * Sox10 |
| 10396476 Rhoj          | NM_023275    | 0.00100367   | -1.39106 | E15.5 * Wnt1 down vs E15.5 * Sox10 |
| 10543031 Slc25a13      | NM_015829    | 6.98009e-007 | -1.39128 | E15.5 * Wnt1 down vs E15.5 * Sox10 |
| 10464425 Grk5          | NM_018869    | 0.000399618  | -1.39289 | E15.5 * Wnt1 down vs E15.5 * Sox10 |
| 10515431 Kif2c         | NM_134471    | 0.00318804   | -1.39308 | E15.5 * Wnt1 down vs E15.5 * Sox10 |
| 10607143 Capn6         | NM_007603    | 1.69457e-005 | -1.3932  | E15.5 * Wnt1 down vs E15.5 * Sox10 |
| 10434925 Hes1          | NM_008235    | 9.68771e-006 | -1.39343 | E15.5 * Wnt1 down vs E15.5 * Sox10 |
| 10520521 Cenpa         | NM_007681    | 2.32817e-005 | -1.39355 | E15.5 * Wnt1 down vs E15.5 * Sox10 |
| 10553897 Mtmr10        | NM_172742    | 0.0047107    | -1.39436 | E15.5 * Wnt1 down vs E15.5 * Sox10 |
| 10595702 1190002N15Rik | NM_001033145 | 0.000369425  | -1.39492 | E15.5 * Wnt1 down vs E15.5 * Sox10 |
| 10441456 Synj2         | NM_011523    | 0.00011729   | -1.39497 | E15.5 * Wnt1 down vs E15.5 * Sox10 |
| 10556463 Arntl         | NM_007489    | 7.28446e-005 | -1.395   | E15.5 * Wnt1 down vs E15.5 * Sox10 |
| 10441436 Snx9          | NM_025664    | 9.97326e-006 | -1.39504 | E15.5 * Wnt1 down vs E15.5 * Sox10 |
| 10399973 Hdac9         | NM_024124    | 3.1505e-005  | -1.39511 | E15.5 * Wnt1 down vs E15.5 * Sox10 |
| 10407709 Mtr           | NM_001081128 | 0.00026566   | -1.39518 | E15.5 * Wnt1 down vs E15.5 * Sox10 |
| 10363575 Dna2          | NM_177372    | 7.87341e-007 | -1.39541 | E15.5 * Wnt1 down vs E15.5 * Sox10 |
| 10487480 Bub1          | NM_001113179 | 1.88219e-005 | -1.39552 | E15.5 * Wnt1 down vs E15.5 * Sox10 |
| 10452556 Rab12         | NM_024448    | 0.00298167   | -1.39558 | E15.5 * Wnt1 down vs E15.5 * Sox10 |
| 10493103 Isg20l2       | NM_177663    | 0.000931625  | -1.39579 | E15.5 * Wnt1 down vs E15.5 * Sox10 |
| 10584710 H2afx         | NM_010436    | 0.000155787  | -1.39618 | E15.5 * Wnt1 down vs E15.5 * Sox10 |
| 10474902 Rad51         | NM_011234    | 0.000180194  | -1.3964  | E15.5 * Wnt1 down vs E15.5 * Sox10 |
| 10433721 Nde1          | NM_023317    | 9.52067e-006 | -1.39644 | E15.5 * Wnt1 down vs E15.5 * Sox10 |
| 10482059 Ggta1         | NM_010283    | 0.00157498   | -1.39647 | E15.5 * Wnt1 down vs E15.5 * Sox10 |
| 10425945 Fbln1         | NM_010180    | 0.000781984  | -1.39671 | E15.5 * Wnt1 down vs E15.5 * Sox10 |
| 10476989 Gins1         | BC027537     | 0.000428473  | -1.39679 | E15.5 * Wnt1 down vs E15.5 * Sox10 |
| 10544906 Ggct          | NM_026637    | 0.000720513  | -1.39702 | E15.5 * Wnt1 down vs E15.5 * Sox10 |
| 10438738 Bcl6          | NM_009744    | 0.000149849  | -1.39821 | E15.5 * Wnt1 down vs E15.5 * Sox10 |
| 10500445 Chd1l         | NM_026539    | 0.000324498  | -1.39855 | E15.5 * Wnt1 down vs E15.5 * Sox10 |
| 10497831 Ccna2         | NM_009828    | 8.64143e-007 | -1.39867 | E15.5 * Wnt1 down vs E15.5 * Sox10 |

|          |               |               |              |          |                                    |
|----------|---------------|---------------|--------------|----------|------------------------------------|
| 10397148 | Acot1         | NM_012006     | 0.00195346   | -1.39882 | E15.5 * Wnt1 down vs E15.5 * Sox10 |
| 10367076 | Prim1         | NM_008921     | 4.65619e-005 | -1.39891 | E15.5 * Wnt1 down vs E15.5 * Sox10 |
| 10443836 | Rrp1b         | NM_028244     | 5.49017e-005 | -1.39893 | E15.5 * Wnt1 down vs E15.5 * Sox10 |
| 10498319 | Serp1         | NM_030685     | 3.89791e-006 | -1.39923 | E15.5 * Wnt1 down vs E15.5 * Sox10 |
| 10529344 | Poln          | NM_181857     | 1.32074e-005 | -1.39948 | E15.5 * Wnt1 down vs E15.5 * Sox10 |
| 10424188 | Mtbp          | NM_134092     | 0.000172321  | -1.40011 | E15.5 * Wnt1 down vs E15.5 * Sox10 |
| 10451679 | Daam2         | NM_001008231  | 0.000348714  | -1.40025 | E15.5 * Wnt1 down vs E15.5 * Sox10 |
| 10449236 | Nme4          | NM_019731     | 0.00181389   | -1.40042 | E15.5 * Wnt1 down vs E15.5 * Sox10 |
| 10514561 | E130114P18Rik | ENSMUST000001 | 0.00182192   | -1.40093 | E15.5 * Wnt1 down vs E15.5 * Sox10 |
| 10379779 | Ddx52         | NM_030096     | 0.000572397  | -1.40106 | E15.5 * Wnt1 down vs E15.5 * Sox10 |
| 10539882 | Ruvbl1        | NM_019685     | 4.36849e-006 | -1.40119 | E15.5 * Wnt1 down vs E15.5 * Sox10 |
| 10466779 | Pip5k1b       | NM_008846     | 0.000851092  | -1.40188 | E15.5 * Wnt1 down vs E15.5 * Sox10 |
| 10588294 | Topbp1        | NM_176979     | 1.36024e-007 | -1.40254 | E15.5 * Wnt1 down vs E15.5 * Sox10 |
| 10391444 | 1700113i22rik | NM_026865     | 0.00357423   | -1.40262 | E15.5 * Wnt1 down vs E15.5 * Sox10 |
| 10607877 | Prps2         | NM_026662     | 0.000120355  | -1.40268 | E15.5 * Wnt1 down vs E15.5 * Sox10 |
| 10550316 | Tmem160       | NM_026938     | 3.47178e-005 | -1.4029  | E15.5 * Wnt1 down vs E15.5 * Sox10 |
| 10403584 | Nid1          | NM_010917     | 8.54796e-005 | -1.40369 | E15.5 * Wnt1 down vs E15.5 * Sox10 |
| 10549200 | Sox5          | NM_011444     | 0.000770868  | -1.40382 | E15.5 * Wnt1 down vs E15.5 * Sox10 |
| 10465912 | Fen1          | NM_007999     | 0.000163732  | -1.40442 | E15.5 * Wnt1 down vs E15.5 * Sox10 |
| 10450519 | Tcf19         | NM_025674     | 7.93899e-006 | -1.40506 | E15.5 * Wnt1 down vs E15.5 * Sox10 |
| 10404152 | Fam65b        | NM_029679     | 0.00104477   | -1.4052  | E15.5 * Wnt1 down vs E15.5 * Sox10 |
| 10491399 | Mrpl47        | NM_029017     | 0.000279545  | -1.40638 | E15.5 * Wnt1 down vs E15.5 * Sox10 |
| 10361651 | Nup43         | NM_145706     | 1.71239e-005 | -1.40653 | E15.5 * Wnt1 down vs E15.5 * Sox10 |
| 10506170 | Efcab7        | NM_145549     | 0.00308145   | -1.40676 | E15.5 * Wnt1 down vs E15.5 * Sox10 |
| 10454709 | Kif20a        | NM_009004     | 5.21545e-008 | -1.40689 | E15.5 * Wnt1 down vs E15.5 * Sox10 |
| 10539433 | Mobkl1b       | ENSMUST000001 | 0.00021108   | -1.4069  | E15.5 * Wnt1 down vs E15.5 * Sox10 |
| 10604616 | Plac1         | NM_019538     | 0.000197913  | -1.40694 | E15.5 * Wnt1 down vs E15.5 * Sox10 |
| 10513061 | Ctnnal1       | NM_018761     | 1.80938e-005 | -1.40736 | E15.5 * Wnt1 down vs E15.5 * Sox10 |
| 10358531 | Hmcn1         | NM_001024720  | 0.00327069   | -1.40824 | E15.5 * Wnt1 down vs E15.5 * Sox10 |
| 10358648 | Hmcn1         | NM_001024720  | 0.00281283   | -1.40854 | E15.5 * Wnt1 down vs E15.5 * Sox10 |
| 10538811 | Prdm5         | NM_027547     | 5.36624e-005 | -1.40865 | E15.5 * Wnt1 down vs E15.5 * Sox10 |
| 10590860 | 9030420J04Rik | BC137891      | 0.000445007  | -1.40882 | E15.5 * Wnt1 down vs E15.5 * Sox10 |
| 10523516 | 4930524J08Rik | ENSMUST000001 | 0.0017677    | -1.40888 | E15.5 * Wnt1 down vs E15.5 * Sox10 |
| 10574378 | Gins3         | NM_030198     | 0.000305889  | -1.40906 | E15.5 * Wnt1 down vs E15.5 * Sox10 |
| 10440419 | Btg3          | NM_009770     | 0.000971957  | -1.40941 | E15.5 * Wnt1 down vs E15.5 * Sox10 |
| 10547758 | Emg1          | NM_013536     | 5.48666e-006 | -1.40941 | E15.5 * Wnt1 down vs E15.5 * Sox10 |
| 10386909 | Cenpv         | NM_028448     | 0.000551058  | -1.41004 | E15.5 * Wnt1 down vs E15.5 * Sox10 |
| 10434782 | Lpp           | NM_178665     | 0.000307467  | -1.41052 | E15.5 * Wnt1 down vs E15.5 * Sox10 |
| 10475890 | Mertk         | NM_008587     | 0.000702469  | -1.41052 | E15.5 * Wnt1 down vs E15.5 * Sox10 |
| 10371676 | Utp20         | NM_175158     | 8.20973e-007 | -1.41123 | E15.5 * Wnt1 down vs E15.5 * Sox10 |
| 10586907 | Mns1          | NM_008613     | 5.31516e-006 | -1.41124 | E15.5 * Wnt1 down vs E15.5 * Sox10 |
| 10495935 | 4930422G04Rik | BC085187      | 1.44617e-005 | -1.41148 | E15.5 * Wnt1 down vs E15.5 * Sox10 |
| 10557519 | Hirip3        | NM_172746     | 8.75335e-005 | -1.4116  | E15.5 * Wnt1 down vs E15.5 * Sox10 |
| 10373467 | Erbb3         | NM_010153     | 0.00388994   | -1.41166 | E15.5 * Wnt1 down vs E15.5 * Sox10 |
| 10361323 | Cnksr3        | NM_172546     | 0.000192041  | -1.41223 | E15.5 * Wnt1 down vs E15.5 * Sox10 |
| 10542275 | Etv6          | NM_007961     | 0.000180844  | -1.41228 | E15.5 * Wnt1 down vs E15.5 * Sox10 |
| 10428698 | Sntb1         | NM_016667     | 0.000228605  | -1.41249 | E15.5 * Wnt1 down vs E15.5 * Sox10 |
| 10502830 | Nexn          | NM_199465     | 0.0046908    | -1.41355 | E15.5 * Wnt1 down vs E15.5 * Sox10 |
| 10454950 | Slc35a4       | NM_026404     | 5.33228e-005 | -1.41568 | E15.5 * Wnt1 down vs E15.5 * Sox10 |
| 10600476 | EG245472      | XM_141845     | 0.000940689  | -1.41578 | E15.5 * Wnt1 down vs E15.5 * Sox10 |
| 10415021 | Abhd4         | NM_134076     | 2.97633e-005 | -1.41611 | E15.5 * Wnt1 down vs E15.5 * Sox10 |
| 10358613 | Hmcn1         | NM_001024720  | 0.00376113   | -1.41618 | E15.5 * Wnt1 down vs E15.5 * Sox10 |
| 10349637 | 2700049P18Rik | NM_175382     | 0.00115188   | -1.41626 | E15.5 * Wnt1 down vs E15.5 * Sox10 |
| 10403076 | ---           | ---           | 5.35586e-005 | -1.41666 | E15.5 * Wnt1 down vs E15.5 * Sox10 |
| 10481272 | 1700007K13Rik | BC099566      | 0.001248     | -1.41667 | E15.5 * Wnt1 down vs E15.5 * Sox10 |
| 10574166 | Cpne2         | NM_153507     | 1.37926e-005 | -1.41669 | E15.5 * Wnt1 down vs E15.5 * Sox10 |
| 10552311 | OTTMUSG00000  | XR_030737     | 4.36797e-005 | -1.41671 | E15.5 * Wnt1 down vs E15.5 * Sox10 |
| 10533026 | Prkab1        | NM_031869     | 0.000296155  | -1.41748 | E15.5 * Wnt1 down vs E15.5 * Sox10 |
| 10416945 | Mirhg1        | AK053349      | 0.00165177   | -1.41938 | E15.5 * Wnt1 down vs E15.5 * Sox10 |
| 10471424 | Fam102a       | NM_153560     | 0.00123516   | -1.42017 | E15.5 * Wnt1 down vs E15.5 * Sox10 |
| 10548105 | Ccnd2         | NM_009829     | 4.27706e-005 | -1.42062 | E15.5 * Wnt1 down vs E15.5 * Sox10 |
| 10445875 | Btg3          | NM_009770     | 0.00150543   | -1.42063 | E15.5 * Wnt1 down vs E15.5 * Sox10 |
| 10504470 | Melk          | NM_010790     | 2.02116e-006 | -1.42163 | E15.5 * Wnt1 down vs E15.5 * Sox10 |
| 10430201 | Myh9          | NM_022410     | 6.08345e-005 | -1.42177 | E15.5 * Wnt1 down vs E15.5 * Sox10 |
| 10432540 | Lima1         | NM_001113545  | 2.23792e-007 | -1.42205 | E15.5 * Wnt1 down vs E15.5 * Sox10 |
| 10582008 | 2310061C15Rik | NM_026844     | 2.83167e-005 | -1.42312 | E15.5 * Wnt1 down vs E15.5 * Sox10 |

|                        |              |              |          |                                    |
|------------------------|--------------|--------------|----------|------------------------------------|
| 10573924 Mmp2          | NM_008610    | 0.000772259  | -1.42332 | E15.5 * Wnt1 down vs E15.5 * Sox10 |
| 10388234 Gsg2          | NM_010353    | 1.63552e-005 | -1.42335 | E15.5 * Wnt1 down vs E15.5 * Sox10 |
| 10361799 Adat2         | NM_025748    | 0.000154876  | -1.42345 | E15.5 * Wnt1 down vs E15.5 * Sox10 |
| 10346000 Gulp1         | NM_028450    | 0.00127916   | -1.42411 | E15.5 * Wnt1 down vs E15.5 * Sox10 |
| 10389797 Stxbp4        | NM_011505    | 0.000252451  | -1.42513 | E15.5 * Wnt1 down vs E15.5 * Sox10 |
| 10476759 Rin2          | NM_028724    | 0.000189807  | -1.42631 | E15.5 * Wnt1 down vs E15.5 * Sox10 |
| 10394798 EG668539      | XR_034692    | 0.00362946   | -1.42748 | E15.5 * Wnt1 down vs E15.5 * Sox10 |
| 10575733 Cenpn         | NM_028131    | 1.93179e-005 | -1.42762 | E15.5 * Wnt1 down vs E15.5 * Sox10 |
| 10530806 Ppat          | BC023841     | 1.89962e-007 | -1.42762 | E15.5 * Wnt1 down vs E15.5 * Sox10 |
| 10480432 Mastl         | NM_025979    | 0.00106293   | -1.42808 | E15.5 * Wnt1 down vs E15.5 * Sox10 |
| 10366043 Dusp6         | NM_026268    | 0.00469524   | -1.42884 | E15.5 * Wnt1 down vs E15.5 * Sox10 |
| 10548176 5930416l19Rik | NR_027360    | 4.19582e-005 | -1.42922 | E15.5 * Wnt1 down vs E15.5 * Sox10 |
| 10395058 Adi1          | NM_134052    | 0.00281192   | -1.4299  | E15.5 * Wnt1 down vs E15.5 * Sox10 |
| 10385248 Hmnr          | NM_013552    | 0.00120318   | -1.43028 | E15.5 * Wnt1 down vs E15.5 * Sox10 |
| 10498168 Exosc8        | NM_027148    | 4.44581e-007 | -1.43047 | E15.5 * Wnt1 down vs E15.5 * Sox10 |
| 10518947 Ajap1         | NM_001099299 | 0.000319971  | -1.43154 | E15.5 * Wnt1 down vs E15.5 * Sox10 |
| 10362538 Lama4         | NM_010681    | 3.50854e-007 | -1.43154 | E15.5 * Wnt1 down vs E15.5 * Sox10 |
| 10456357 Pmaip1        | NM_021451    | 0.0018373    | -1.43231 | E15.5 * Wnt1 down vs E15.5 * Sox10 |
| 10473367 Slc43a1       | NM_001081349 | 0.000464752  | -1.43256 | E15.5 * Wnt1 down vs E15.5 * Sox10 |
| 10367982 Gpr126        | NM_001002268 | 0.000279601  | -1.43421 | E15.5 * Wnt1 down vs E15.5 * Sox10 |
| 10358535 Hmcn1         | NM_001024720 | 0.00153308   | -1.43429 | E15.5 * Wnt1 down vs E15.5 * Sox10 |
| 10506031 Nfia          | NM_010905    | 0.0039882    | -1.43507 | E15.5 * Wnt1 down vs E15.5 * Sox10 |
| 10400357 Baz1a         | NM_013815    | 0.00030038   | -1.43582 | E15.5 * Wnt1 down vs E15.5 * Sox10 |
| 10508052 Grik3         | NM_001081097 | 0.0036516    | -1.43613 | E15.5 * Wnt1 down vs E15.5 * Sox10 |
| 10555695 Rrm1          | NM_009103    | 4.8728e-008  | -1.43656 | E15.5 * Wnt1 down vs E15.5 * Sox10 |
| 10381526 Ppih          | NM_001110130 | 6.78158e-005 | -1.43666 | E15.5 * Wnt1 down vs E15.5 * Sox10 |
| 10607475 Prdx4         | NM_016764    | 7.12453e-005 | -1.43672 | E15.5 * Wnt1 down vs E15.5 * Sox10 |
| 10545130 Gadd45a       | NM_007836    | 0.000314453  | -1.43812 | E15.5 * Wnt1 down vs E15.5 * Sox10 |
| 10406581 Dhfr          | NM_010049    | 0.000251243  | -1.43833 | E15.5 * Wnt1 down vs E15.5 * Sox10 |
| 10563883 Depdc1a       | NM_029523    | 0.00308846   | -1.43842 | E15.5 * Wnt1 down vs E15.5 * Sox10 |
| 10513608 Alad          | NM_008525    | 5.99843e-005 | -1.4385  | E15.5 * Wnt1 down vs E15.5 * Sox10 |
| 10573451 Syce2         | NM_027954    | 1.61137e-007 | -1.43879 | E15.5 * Wnt1 down vs E15.5 * Sox10 |
| 10412207 Gpx8          | NM_027127    | 1.10369e-005 | -1.43892 | E15.5 * Wnt1 down vs E15.5 * Sox10 |
| 10400405 Nfkb1a        | NM_010907    | 0.000282993  | -1.43905 | E15.5 * Wnt1 down vs E15.5 * Sox10 |
| 10358555 Hmcn1         | NM_001024720 | 0.00169251   | -1.44093 | E15.5 * Wnt1 down vs E15.5 * Sox10 |
| 10503508 Ggh           | NM_010281    | 0.000129951  | -1.44129 | E15.5 * Wnt1 down vs E15.5 * Sox10 |
| 10503523 Ggh           | NM_010281    | 0.000129951  | -1.44129 | E15.5 * Wnt1 down vs E15.5 * Sox10 |
| 10516246 Cdca8         | NM_026560    | 1.45042e-006 | -1.44162 | E15.5 * Wnt1 down vs E15.5 * Sox10 |
| 10394749 Nol10         | NM_001008421 | 4.29056e-005 | -1.4418  | E15.5 * Wnt1 down vs E15.5 * Sox10 |
| 10532504 Hscb          | NM_153571    | 0.000708116  | -1.44209 | E15.5 * Wnt1 down vs E15.5 * Sox10 |
| 10451805 Sgol1         | NM_028232    | 5.02578e-005 | -1.44228 | E15.5 * Wnt1 down vs E15.5 * Sox10 |
| 10416655 EG432879      | NM_001034882 | 0.00342286   | -1.4423  | E15.5 * Wnt1 down vs E15.5 * Sox10 |
| 10583008 Casp12        | NM_009808    | 0.00207399   | -1.44291 | E15.5 * Wnt1 down vs E15.5 * Sox10 |
| 10506680 Tmem48        | NM_028355    | 5.05473e-006 | -1.44293 | E15.5 * Wnt1 down vs E15.5 * Sox10 |
| 10584674 Mcam          | NM_023061    | 3.10721e-005 | -1.44305 | E15.5 * Wnt1 down vs E15.5 * Sox10 |
| 10503952 Ifnk          | NM_199157    | 0.00201239   | -1.44356 | E15.5 * Wnt1 down vs E15.5 * Sox10 |
| 10420426 F630043A04Rik | NM_198605    | 5.67428e-005 | -1.44522 | E15.5 * Wnt1 down vs E15.5 * Sox10 |
| 10460738 Cdca5         | NM_026410    | 0.00455686   | -1.44534 | E15.5 * Wnt1 down vs E15.5 * Sox10 |
| 10494595 Notch2        | NM_010928    | 0.000127592  | -1.44548 | E15.5 * Wnt1 down vs E15.5 * Sox10 |
| 10495675 F3            | NM_010171    | 0.000153179  | -1.44581 | E15.5 * Wnt1 down vs E15.5 * Sox10 |
| 10458195 Cdc25c        | NM_009860    | 0.000205667  | -1.44674 | E15.5 * Wnt1 down vs E15.5 * Sox10 |
| 10350146 Phlda3        | NM_013750    | 0.000311608  | -1.44693 | E15.5 * Wnt1 down vs E15.5 * Sox10 |
| 10594774 Ccnb2         | NM_007630    | 2.74238e-005 | -1.44701 | E15.5 * Wnt1 down vs E15.5 * Sox10 |
| 10547073 Snora7a       | AF357398     | 0.00230243   | -1.44707 | E15.5 * Wnt1 down vs E15.5 * Sox10 |
| 10461093 Pla2g16       | NM_139269    | 0.00202294   | -1.44814 | E15.5 * Wnt1 down vs E15.5 * Sox10 |
| 10524417 Iscu          | NM_025526    | 0.00144041   | -1.44887 | E15.5 * Wnt1 down vs E15.5 * Sox10 |
| 10500666 Ptgfrn        | NM_011197    | 0.0030953    | -1.44893 | E15.5 * Wnt1 down vs E15.5 * Sox10 |
| 10384322 Hus1          | NM_008316    | 0.00032002   | -1.45004 | E15.5 * Wnt1 down vs E15.5 * Sox10 |
| 10557156 Plk1          | NM_011121    | 0.000137531  | -1.45019 | E15.5 * Wnt1 down vs E15.5 * Sox10 |
| 10355325 Bard1         | NM_007525    | 0.00155405   | -1.45022 | E15.5 * Wnt1 down vs E15.5 * Sox10 |
| 10462866 Cep55         | NM_028760    | 0.000110042  | -1.45045 | E15.5 * Wnt1 down vs E15.5 * Sox10 |
| 10569646 Ccnd1         | NM_007631    | 2.17053e-005 | -1.45047 | E15.5 * Wnt1 down vs E15.5 * Sox10 |
| 10416371 P2ry5         | NM_175116    | 3.13305e-005 | -1.4506  | E15.5 * Wnt1 down vs E15.5 * Sox10 |
| 10466938 5033414D02Rik | NM_026362    | 0.00444785   | -1.45158 | E15.5 * Wnt1 down vs E15.5 * Sox10 |
| 10453553               | ---          | 0.000324152  | -1.45159 | E15.5 * Wnt1 down vs E15.5 * Sox10 |
| 10586781 Myo1e         | NM_181072    | 0.000493796  | -1.45196 | E15.5 * Wnt1 down vs E15.5 * Sox10 |

|          |               |              |              |          |                                    |
|----------|---------------|--------------|--------------|----------|------------------------------------|
| 10474825 | D2ErtD750e    | NM_026412    | 0.000428857  | -1.45206 | E15.5 * Wnt1 down vs E15.5 * Sox10 |
| 10580183 | Ier2          | NM_010499    | 0.00384483   | -1.45325 | E15.5 * Wnt1 down vs E15.5 * Sox10 |
| 10374777 | Efemp1        | NM_146015    | 0.00354673   | -1.45337 | E15.5 * Wnt1 down vs E15.5 * Sox10 |
| 10542824 | Mrps35        | NM_145573    | 0.000134751  | -1.45459 | E15.5 * Wnt1 down vs E15.5 * Sox10 |
| 10591781 | Anln          | NM_028390    | 8.46603e-006 | -1.45463 | E15.5 * Wnt1 down vs E15.5 * Sox10 |
| 10495596 | Frrs1         | NM_001113478 | 0.000673307  | -1.45466 | E15.5 * Wnt1 down vs E15.5 * Sox10 |
| 10462613 | Ifit2         | NM_008332    | 7.60834e-006 | -1.45554 | E15.5 * Wnt1 down vs E15.5 * Sox10 |
| 10546163 | Mcm2          | NM_008564    | 0.000234913  | -1.45598 | E15.5 * Wnt1 down vs E15.5 * Sox10 |
| 10373530 | Cdk2          | NM_183417    | 0.00118138   | -1.45602 | E15.5 * Wnt1 down vs E15.5 * Sox10 |
| 10524169 | Pole          | NM_011132    | 1.51543e-006 | -1.45614 | E15.5 * Wnt1 down vs E15.5 * Sox10 |
| 10439130 | Umps          | NM_009471    | 5.95998e-006 | -1.45627 | E15.5 * Wnt1 down vs E15.5 * Sox10 |
| 10542079 | Foxm1         | NM_008021    | 9.33036e-006 | -1.45628 | E15.5 * Wnt1 down vs E15.5 * Sox10 |
| 10506880 | Kti12         | NM_029571    | 0.00296824   | -1.45668 | E15.5 * Wnt1 down vs E15.5 * Sox10 |
| 10592201 | Chek1         | NM_007691    | 0.00014722   | -1.45681 | E15.5 * Wnt1 down vs E15.5 * Sox10 |
| 10449644 | Glo1          | NM_025374    | 1.32714e-005 | -1.45709 | E15.5 * Wnt1 down vs E15.5 * Sox10 |
| 10364518 | Ptbp1         | NM_001077363 | 9.746e-005   | -1.45796 | E15.5 * Wnt1 down vs E15.5 * Sox10 |
| 10487139 | Shc4          | NM_199022    | 8.53181e-006 | -1.45825 | E15.5 * Wnt1 down vs E15.5 * Sox10 |
| 10585395 | Siva1         | NM_013929    | 0.00281323   | -1.45911 | E15.5 * Wnt1 down vs E15.5 * Sox10 |
| 10349239 | Mki67ip       | NM_026472    | 9.36134e-006 | -1.45929 | E15.5 * Wnt1 down vs E15.5 * Sox10 |
| 10476301 | Smox          | NM_145533    | 0.00106875   | -1.46049 | E15.5 * Wnt1 down vs E15.5 * Sox10 |
| 10522712 | Rest          | NM_011263    | 5.99935e-005 | -1.46097 | E15.5 * Wnt1 down vs E15.5 * Sox10 |
| 10512065 | OTTMUSG00000  | XR_033416    | 0.00147569   | -1.46131 | E15.5 * Wnt1 down vs E15.5 * Sox10 |
| 10432986 | Aaas          | NM_153416    | 3.76825e-005 | -1.46144 | E15.5 * Wnt1 down vs E15.5 * Sox10 |
| 10466521 | Gcnt1         | NM_173442    | 0.00036776   | -1.46146 | E15.5 * Wnt1 down vs E15.5 * Sox10 |
| 10508151 | Clspn         | NM_175554    | 6.25205e-005 | -1.46213 | E15.5 * Wnt1 down vs E15.5 * Sox10 |
| 10470318 | ---           | ---          | 0.00195148   | -1.4637  | E15.5 * Wnt1 down vs E15.5 * Sox10 |
| 10436106 | C330027C09Rik | NM_172616    | 0.000110756  | -1.46388 | E15.5 * Wnt1 down vs E15.5 * Sox10 |
| 10534974 | Mcm7          | NM_008568    | 0.000223255  | -1.4647  | E15.5 * Wnt1 down vs E15.5 * Sox10 |
| 10599498 | Utp14a        | NM_028276    | 1.18309e-007 | -1.46471 | E15.5 * Wnt1 down vs E15.5 * Sox10 |
| 10478160 | Fam83d        | BC068129     | 1.44069e-005 | -1.46574 | E15.5 * Wnt1 down vs E15.5 * Sox10 |
| 10501402 | Gpsm2         | NM_029522    | 7.57542e-005 | -1.46622 | E15.5 * Wnt1 down vs E15.5 * Sox10 |
| 10571815 | Gpm6a         | NM_153581    | 0.00494926   | -1.46716 | E15.5 * Wnt1 down vs E15.5 * Sox10 |
| 10415132 | Cmtm5         | NM_026066    | 9.23478e-005 | -1.46767 | E15.5 * Wnt1 down vs E15.5 * Sox10 |
| 10415640 | Snora65       | NR_002898    | 1.78313e-005 | -1.46799 | E15.5 * Wnt1 down vs E15.5 * Sox10 |
| 10467420 | Pdlim1        | NM_016861    | 0.00058499   | -1.46809 | E15.5 * Wnt1 down vs E15.5 * Sox10 |
| 10352048 | Exo1          | NM_012012    | 5.75922e-006 | -1.46868 | E15.5 * Wnt1 down vs E15.5 * Sox10 |
| 10426098 | CrelD2        | NM_029720    | 9.57113e-008 | -1.4688  | E15.5 * Wnt1 down vs E15.5 * Sox10 |
| 10497122 | Depdc1a       | NM_029523    | 0.00308489   | -1.46905 | E15.5 * Wnt1 down vs E15.5 * Sox10 |
| 10587534 | Bckdhh        | NM_199195    | 0.000142751  | -1.46953 | E15.5 * Wnt1 down vs E15.5 * Sox10 |
| 10497703 | Mrpl47        | NM_029017    | 5.41959e-005 | -1.46985 | E15.5 * Wnt1 down vs E15.5 * Sox10 |
| 10447097 | Gemin6        | NM_026053    | 0.000563376  | -1.47005 | E15.5 * Wnt1 down vs E15.5 * Sox10 |
| 10547943 | Ncapd2        | NM_146171    | 3.586e-005   | -1.47053 | E15.5 * Wnt1 down vs E15.5 * Sox10 |
| 10466935 | Rln1          | NM_011272    | 0.00113695   | -1.47159 | E15.5 * Wnt1 down vs E15.5 * Sox10 |
| 10603316 | 2010204K13Rik | AF038507     | 5.57365e-005 | -1.47288 | E15.5 * Wnt1 down vs E15.5 * Sox10 |
| 10409190 | Cenpp         | NM_025495    | 0.00131437   | -1.47346 | E15.5 * Wnt1 down vs E15.5 * Sox10 |
| 10521709 | Lap3          | NM_024434    | 6.04979e-006 | -1.47408 | E15.5 * Wnt1 down vs E15.5 * Sox10 |
| 10604713 | Arhgef6       | NM_152801    | 0.00275323   | -1.47452 | E15.5 * Wnt1 down vs E15.5 * Sox10 |
| 10530692 | Kdr           | NM_010612    | 0.00012026   | -1.47503 | E15.5 * Wnt1 down vs E15.5 * Sox10 |
| 10499168 | Kirrel        | NM_130867    | 0.00143115   | -1.47504 | E15.5 * Wnt1 down vs E15.5 * Sox10 |
| 10372796 | Hmga2         | NM_010441    | 3.07575e-005 | -1.47548 | E15.5 * Wnt1 down vs E15.5 * Sox10 |
| 10490903 | Car13         | NM_024495    | 0.000782429  | -1.47581 | E15.5 * Wnt1 down vs E15.5 * Sox10 |
| 10384474 | Pno1          | NM_025443    | 7.01595e-005 | -1.47652 | E15.5 * Wnt1 down vs E15.5 * Sox10 |
| 10452633 | Tgif1         | NM_009372    | 4.19629e-005 | -1.47766 | E15.5 * Wnt1 down vs E15.5 * Sox10 |
| 10476889 | Nxt1          | NM_001110159 | 0.000122338  | -1.47963 | E15.5 * Wnt1 down vs E15.5 * Sox10 |
| 10576883 | Shcbp1        | NM_011369    | 8.79895e-007 | -1.47991 | E15.5 * Wnt1 down vs E15.5 * Sox10 |
| 10345777 | Il1rl2        | NM_133193    | 0.00479232   | -1.47996 | E15.5 * Wnt1 down vs E15.5 * Sox10 |
| 10485963 | Arhgap11a     | NM_181416    | 9.31484e-006 | -1.48042 | E15.5 * Wnt1 down vs E15.5 * Sox10 |
| 10438378 | Cdc45l        | NM_009862    | 1.09595e-005 | -1.4825  | E15.5 * Wnt1 down vs E15.5 * Sox10 |
| 10358650 | Hmcn1         | NM_001024720 | 0.000164081  | -1.48428 | E15.5 * Wnt1 down vs E15.5 * Sox10 |
| 10502778 | Lphn2         | NM_001081298 | 0.001246     | -1.48447 | E15.5 * Wnt1 down vs E15.5 * Sox10 |
| 10487340 | Ncaph         | NM_144818    | 2.0196e-007  | -1.48525 | E15.5 * Wnt1 down vs E15.5 * Sox10 |
| 10515836 | Ccnb1         | NM_172301    | 1.52559e-005 | -1.48614 | E15.5 * Wnt1 down vs E15.5 * Sox10 |
| 10354741 | Rftn2         | NM_028713    | 1.92606e-006 | -1.48692 | E15.5 * Wnt1 down vs E15.5 * Sox10 |
| 10514510 | Cyp2j6        | NM_010008    | 0.000167252  | -1.48721 | E15.5 * Wnt1 down vs E15.5 * Sox10 |
| 10546538 | Suclg2        | NM_011507    | 7.55725e-008 | -1.48862 | E15.5 * Wnt1 down vs E15.5 * Sox10 |
| 10407390 | Ptbp1         | NM_001077363 | 0.000722083  | -1.48876 | E15.5 * Wnt1 down vs E15.5 * Sox10 |

|          |               |               |              |          |                                    |
|----------|---------------|---------------|--------------|----------|------------------------------------|
| 10423293 | Myo10         | NM_019472     | 6.76472e-005 | -1.49    | E15.5 * Wnt1 down vs E15.5 * Sox10 |
| 10358557 | Hmcn1         | NM_001024720  | 0.00103286   | -1.4911  | E15.5 * Wnt1 down vs E15.5 * Sox10 |
| 10471675 | Glo1          | NM_025374     | 0.000167419  | -1.49111 | E15.5 * Wnt1 down vs E15.5 * Sox10 |
| 10537062 | Mest          | NM_008590     | 4.88966e-008 | -1.49171 | E15.5 * Wnt1 down vs E15.5 * Sox10 |
| 10565852 | Rnf169        | AK173319      | 4.58647e-006 | -1.49206 | E15.5 * Wnt1 down vs E15.5 * Sox10 |
| 10438626 | Etv5          | NM_023794     | 0.000669892  | -1.49219 | E15.5 * Wnt1 down vs E15.5 * Sox10 |
| 10572989 | Slc10a7       | NM_029736     | 1.57691e-006 | -1.49293 | E15.5 * Wnt1 down vs E15.5 * Sox10 |
| 10364683 | Stk11         | NM_011492     | 0.000790768  | -1.4935  | E15.5 * Wnt1 down vs E15.5 * Sox10 |
| 10360920 | Tgfb2         | NM_009367     | 4.99914e-011 | -1.49429 | E15.5 * Wnt1 down vs E15.5 * Sox10 |
| 10430458 | Sox10         | NM_011437     | 0.00192583   | -1.49445 | E15.5 * Wnt1 down vs E15.5 * Sox10 |
| 10371959 | Elk3          | NM_013508     | 2.05716e-007 | -1.49478 | E15.5 * Wnt1 down vs E15.5 * Sox10 |
| 10456400 | Tubb6         | NM_026473     | 1.89471e-007 | -1.49561 | E15.5 * Wnt1 down vs E15.5 * Sox10 |
| 10410560 | Trip13        | NM_027182     | 1.12269e-005 | -1.49606 | E15.5 * Wnt1 down vs E15.5 * Sox10 |
| 10408928 | Hspb1         | NM_013560     | 0.00406109   | -1.49641 | E15.5 * Wnt1 down vs E15.5 * Sox10 |
| 10426016 | Gtse1         | NM_013882     | 2.18051e-006 | -1.49642 | E15.5 * Wnt1 down vs E15.5 * Sox10 |
| 10462035 | Ldhd          | NM_008492     | 9.42136e-007 | -1.49694 | E15.5 * Wnt1 down vs E15.5 * Sox10 |
| 10595404 | Fam46a        | ENSMUST000000 | 0.000954965  | -1.49765 | E15.5 * Wnt1 down vs E15.5 * Sox10 |
| 10408902 | Ccdc90a       | NM_001081059  | 0.000236417  | -1.49831 | E15.5 * Wnt1 down vs E15.5 * Sox10 |
| 10492335 | Rap2b         | NM_028712     | 7.45884e-006 | -1.49837 | E15.5 * Wnt1 down vs E15.5 * Sox10 |
| 10517513 | C1qc          | NM_007574     | 0.00130743   | -1.49896 | E15.5 * Wnt1 down vs E15.5 * Sox10 |
| 10375234 | Nudcd2        | NM_026023     | 9.37018e-009 | -1.49939 | E15.5 * Wnt1 down vs E15.5 * Sox10 |
| 10450374 | D17H6S56E-5   | L78788        | 1.3091e-005  | -1.49942 | E15.5 * Wnt1 down vs E15.5 * Sox10 |
| 10506150 | Foxd3         | NM_010425     | 0.0037256    | -1.49963 | E15.5 * Wnt1 down vs E15.5 * Sox10 |
| 10597413 | Crtap         | NM_019922     | 8.14629e-005 | -1.50105 | E15.5 * Wnt1 down vs E15.5 * Sox10 |
| 10607497 | Suc1g2        | NM_011507     | 1.19271e-006 | -1.50118 | E15.5 * Wnt1 down vs E15.5 * Sox10 |
| 10591556 | Spc24         | NM_026282     | 2.03838e-005 | -1.50153 | E15.5 * Wnt1 down vs E15.5 * Sox10 |
| 10577633 | Golga7        | NM_020585     | 0.000892674  | -1.50488 | E15.5 * Wnt1 down vs E15.5 * Sox10 |
| 10361375 | Fbxo5         | NM_025995     | 5.97045e-006 | -1.50606 | E15.5 * Wnt1 down vs E15.5 * Sox10 |
| 10586604 | Rps27l        | NM_026467     | 6.38702e-006 | -1.50653 | E15.5 * Wnt1 down vs E15.5 * Sox10 |
| 10562223 | Fxyd3         | NM_008557     | 2.16789e-005 | -1.50658 | E15.5 * Wnt1 down vs E15.5 * Sox10 |
| 10505132 | Akap2         | NM_001035533  | 3.03051e-007 | -1.50733 | E15.5 * Wnt1 down vs E15.5 * Sox10 |
| 10506118 | Usp1          | NM_146144     | 9.08323e-005 | -1.50752 | E15.5 * Wnt1 down vs E15.5 * Sox10 |
| 10358978 | Ier5          | NM_010500     | 6.15715e-007 | -1.50798 | E15.5 * Wnt1 down vs E15.5 * Sox10 |
| 10446928 | Ltbp1         | NM_019919     | 1.27313e-006 | -1.50832 | E15.5 * Wnt1 down vs E15.5 * Sox10 |
| 10537157 | 2310005E10Rik | NM_172398     | 5.93498e-006 | -1.50842 | E15.5 * Wnt1 down vs E15.5 * Sox10 |
| 10512022 | Mobkl2b       | ENSMUST000000 | 0.00128451   | -1.5088  | E15.5 * Wnt1 down vs E15.5 * Sox10 |
| 10408838 | Elovl2        | NM_019423     | 0.000399589  | -1.50996 | E15.5 * Wnt1 down vs E15.5 * Sox10 |
| 10385153 | Ccdc99        | NM_027411     | 0.000340635  | -1.51099 | E15.5 * Wnt1 down vs E15.5 * Sox10 |
| 10516064 | Mfsd2         | NM_029662     | 0.000905252  | -1.51132 | E15.5 * Wnt1 down vs E15.5 * Sox10 |
| 10438690 | Rfc4          | NM_145480     | 0.000347123  | -1.51267 | E15.5 * Wnt1 down vs E15.5 * Sox10 |
| 10397002 | Sipa1l1       | NM_172579     | 6.76653e-006 | -1.51291 | E15.5 * Wnt1 down vs E15.5 * Sox10 |
| 10506433 | Dab1          | NM_177259     | 4.4247e-005  | -1.5132  | E15.5 * Wnt1 down vs E15.5 * Sox10 |
| 10416037 | Pbk           | NM_023209     | 0.000238613  | -1.51335 | E15.5 * Wnt1 down vs E15.5 * Sox10 |
| 10400649 | Pole2         | NM_011133     | 1.60979e-005 | -1.51446 | E15.5 * Wnt1 down vs E15.5 * Sox10 |
| 10363146 | Slc35f1       | NM_178675     | 0.00107337   | -1.52053 | E15.5 * Wnt1 down vs E15.5 * Sox10 |
| 10368556 | Hey2          | NM_013904     | 0.000339517  | -1.52076 | E15.5 * Wnt1 down vs E15.5 * Sox10 |
| 10419323 | Dlgap5        | NM_144553     | 1.14571e-006 | -1.52143 | E15.5 * Wnt1 down vs E15.5 * Sox10 |
| 10486029 | Atpbd4        | NM_025675     | 0.000181318  | -1.52302 | E15.5 * Wnt1 down vs E15.5 * Sox10 |
| 10475866 | Bcl2l11       | NM_207680     | 6.05106e-006 | -1.52428 | E15.5 * Wnt1 down vs E15.5 * Sox10 |
| 10482517 | Nmi           | NM_001141949  | 0.00258757   | -1.52569 | E15.5 * Wnt1 down vs E15.5 * Sox10 |
| 10475643 | Fgf7          | NM_008008     | 0.00499673   | -1.526   | E15.5 * Wnt1 down vs E15.5 * Sox10 |
| 10384032 | Pold2         | NM_008894     | 2.63056e-005 | -1.52625 | E15.5 * Wnt1 down vs E15.5 * Sox10 |
| 10498018 | Pcdh18        | NM_130448     | 4.00217e-006 | -1.52735 | E15.5 * Wnt1 down vs E15.5 * Sox10 |
| 10436369 | Filip1l       | NM_030163     | 4.51711e-008 | -1.53015 | E15.5 * Wnt1 down vs E15.5 * Sox10 |
| 10384223 | Igfbp3        | NM_008343     | 0.000128313  | -1.53025 | E15.5 * Wnt1 down vs E15.5 * Sox10 |
| 10554808 | Fzd4          | NM_008055     | 0.00073718   | -1.53185 | E15.5 * Wnt1 down vs E15.5 * Sox10 |
| 10577508 | Ckap2         | NM_001004140  | 3.96203e-005 | -1.53315 | E15.5 * Wnt1 down vs E15.5 * Sox10 |
| 10577190 | Rasa3         | NM_009025     | 2.99087e-005 | -1.5333  | E15.5 * Wnt1 down vs E15.5 * Sox10 |
| 10383632 | Sfi1          | NM_030207     | 0.000325127  | -1.53363 | E15.5 * Wnt1 down vs E15.5 * Sox10 |
| 10493114 | Nes           | NM_016701     | 0.00390705   | -1.53535 | E15.5 * Wnt1 down vs E15.5 * Sox10 |
| 10361110 | Dtl           | NM_029766     | 2.28129e-006 | -1.53897 | E15.5 * Wnt1 down vs E15.5 * Sox10 |
| 10545458 | Tcf3          | NM_001079822  | 5.28403e-005 | -1.54021 | E15.5 * Wnt1 down vs E15.5 * Sox10 |
| 10353420 | Mcm3          | NM_008563     | 3.83952e-008 | -1.54064 | E15.5 * Wnt1 down vs E15.5 * Sox10 |
| 10577315 | Angpt2        | NM_007426     | 4.1599e-006  | -1.54207 | E15.5 * Wnt1 down vs E15.5 * Sox10 |
| 10346564 | Casp8         | NM_009812     | 0.000406035  | -1.5423  | E15.5 * Wnt1 down vs E15.5 * Sox10 |
| 10545974 | Antxr1        | NM_054041     | 0.00198892   | -1.54231 | E15.5 * Wnt1 down vs E15.5 * Sox10 |

|                        |              |              |          |                                    |
|------------------------|--------------|--------------|----------|------------------------------------|
| 10419790 Jub           | NM_010590    | 0.000287262  | -1.54285 | E15.5 * Wnt1 down vs E15.5 * Sox10 |
| 10455967 2610318N02Rik | BC039993     | 0.000341171  | -1.54324 | E15.5 * Wnt1 down vs E15.5 * Sox10 |
| 10601011 Kif4          | NM_008446    | 2.68524e-007 | -1.54371 | E15.5 * Wnt1 down vs E15.5 * Sox10 |
| 10483809 Nfe2l2        | NM_010902    | 0.000107338  | -1.54894 | E15.5 * Wnt1 down vs E15.5 * Sox10 |
| 10366796 Mettl1        | NM_010792    | 0.000163215  | -1.55082 | E15.5 * Wnt1 down vs E15.5 * Sox10 |
| 10362394 Hddc2         | NM_027168    | 0.000140519  | -1.55114 | E15.5 * Wnt1 down vs E15.5 * Sox10 |
| 10562637 Ccnb1         | NM_172301    | 3.84077e-006 | -1.55123 | E15.5 * Wnt1 down vs E15.5 * Sox10 |
| 10437945 Mcm4          | NM_008565    | 6.592e-007   | -1.55124 | E15.5 * Wnt1 down vs E15.5 * Sox10 |
| 10398874 Siva1         | NM_013929    | 1.52745e-006 | -1.55743 | E15.5 * Wnt1 down vs E15.5 * Sox10 |
| 10411739 Ccnb1         | NM_172301    | 1.66146e-006 | -1.55837 | E15.5 * Wnt1 down vs E15.5 * Sox10 |
| 10400304 EglN3         | NM_028133    | 0.00318473   | -1.55838 | E15.5 * Wnt1 down vs E15.5 * Sox10 |
| 10502510 Lmo4          | NM_010723    | 2.8869e-005  | -1.55975 | E15.5 * Wnt1 down vs E15.5 * Sox10 |
| 10469358 Mrc1          | NM_008625    | 0.00128321   | -1.56038 | E15.5 * Wnt1 down vs E15.5 * Sox10 |
| 10440186 Crybg3        | NM_174848    | 0.000228455  | -1.56128 | E15.5 * Wnt1 down vs E15.5 * Sox10 |
| 10401238 Zfp36l1       | NM_007564    | 0.000340347  | -1.56425 | E15.5 * Wnt1 down vs E15.5 * Sox10 |
| 10394770 Odc1          | NM_013614    | 7.24726e-008 | -1.57036 | E15.5 * Wnt1 down vs E15.5 * Sox10 |
| 10422598 Sepp1         | NM_009155    | 0.00035891   | -1.57108 | E15.5 * Wnt1 down vs E15.5 * Sox10 |
| 10388430 Serpinf1      | NM_011340    | 2.24023e-007 | -1.57445 | E15.5 * Wnt1 down vs E15.5 * Sox10 |
| 10394809 EG668645      | XR_033945    | 0.000204602  | -1.57463 | E15.5 * Wnt1 down vs E15.5 * Sox10 |
| 10394816 EG668645      | XR_033945    | 0.000204602  | -1.57463 | E15.5 * Wnt1 down vs E15.5 * Sox10 |
| 10596637 Mapkapk3      | NM_178907    | 4.8662e-005  | -1.57525 | E15.5 * Wnt1 down vs E15.5 * Sox10 |
| 10474860 Chst14        | NM_028117    | 7.98764e-007 | -1.5843  | E15.5 * Wnt1 down vs E15.5 * Sox10 |
| 10571530 Fat1          | NM_001081286 | 1.92291e-007 | -1.58467 | E15.5 * Wnt1 down vs E15.5 * Sox10 |
| 10558345 Dock1         | NM_001033420 | 5.51205e-008 | -1.58595 | E15.5 * Wnt1 down vs E15.5 * Sox10 |
| 10489051 5730471H19Rik | AK133873     | 7.05446e-005 | -1.58635 | E15.5 * Wnt1 down vs E15.5 * Sox10 |
| 10399087 Ncapg2        | NM_133762    | 0.000107629  | -1.59242 | E15.5 * Wnt1 down vs E15.5 * Sox10 |
| 10572906 Mcm5          | NM_008566    | 1.19019e-005 | -1.59443 | E15.5 * Wnt1 down vs E15.5 * Sox10 |
| 10473384 Slc43a3       | NM_021398    | 6.47774e-006 | -1.59507 | E15.5 * Wnt1 down vs E15.5 * Sox10 |
| 10434845 Il1rap        | NM_008364    | 1.27588e-006 | -1.59734 | E15.5 * Wnt1 down vs E15.5 * Sox10 |
| 10541091 Gemin6        | NM_026053    | 9.3895e-007  | -1.59769 | E15.5 * Wnt1 down vs E15.5 * Sox10 |
| 10458906 Ppic          | NM_008908    | 2.0445e-009  | -1.59822 | E15.5 * Wnt1 down vs E15.5 * Sox10 |
| 10364593 Cnn2          | NM_007725    | 0.00105366   | -1.60448 | E15.5 * Wnt1 down vs E15.5 * Sox10 |
| 10513320 Ptgr1         | NM_025968    | 4.15006e-008 | -1.60594 | E15.5 * Wnt1 down vs E15.5 * Sox10 |
| 10350733 Rgs16         | NM_011267    | 0.00267535   | -1.60693 | E15.5 * Wnt1 down vs E15.5 * Sox10 |
| 10497265 Fabp4         | NM_024406    | 0.00302511   | -1.60809 | E15.5 * Wnt1 down vs E15.5 * Sox10 |
| 10431915 Slc38a4       | NM_027052    | 9.09492e-006 | -1.61256 | E15.5 * Wnt1 down vs E15.5 * Sox10 |
| 10567355 Gprc5b        | NM_022420    | 1.50442e-006 | -1.6183  | E15.5 * Wnt1 down vs E15.5 * Sox10 |
| 10492341 4631416L12Rik | NM_001081295 | 8.83091e-005 | -1.62002 | E15.5 * Wnt1 down vs E15.5 * Sox10 |
| 10462683 Pcgf5         | NM_029508    | 0.000224025  | -1.62128 | E15.5 * Wnt1 down vs E15.5 * Sox10 |
| 10485624 Prrg4         | NM_178695    | 4.30209e-005 | -1.62236 | E15.5 * Wnt1 down vs E15.5 * Sox10 |
| 10586591 Car12         | NM_178396    | 3.04027e-005 | -1.63563 | E15.5 * Wnt1 down vs E15.5 * Sox10 |
| 10351259 Slc19a2       | NM_054087    | 0.000897294  | -1.64008 | E15.5 * Wnt1 down vs E15.5 * Sox10 |
| 10434806 Lpp           | NM_178665    | 8.08399e-005 | -1.6401  | E15.5 * Wnt1 down vs E15.5 * Sox10 |
| 10352661 Ptpn14        | NM_008976    | 3.59493e-006 | -1.64691 | E15.5 * Wnt1 down vs E15.5 * Sox10 |
| 10353010 Mybl1         | NM_008651    | 0.000147596  | -1.65498 | E15.5 * Wnt1 down vs E15.5 * Sox10 |
| 10428672 Dsccl1        | NM_183089    | 2.59572e-006 | -1.65788 | E15.5 * Wnt1 down vs E15.5 * Sox10 |
| 10362201 Ctgf          | NM_010217    | 1.52857e-005 | -1.65867 | E15.5 * Wnt1 down vs E15.5 * Sox10 |
| 10467139 Lipa          | NM_021460    | 3.48e-007    | -1.66029 | E15.5 * Wnt1 down vs E15.5 * Sox10 |
| 10347792               | ---          | 5.58568e-005 | -1.67247 | E15.5 * Wnt1 down vs E15.5 * Sox10 |
| 10466104 Ccdc86        | NM_023731    | 2.59198e-005 | -1.67295 | E15.5 * Wnt1 down vs E15.5 * Sox10 |
| 10373702 Pisd-ps1      | NR_003517    | 0.000168435  | -1.67538 | E15.5 * Wnt1 down vs E15.5 * Sox10 |
| 10606071 Ercc6l        | NM_146235    | 3.72955e-006 | -1.67989 | E15.5 * Wnt1 down vs E15.5 * Sox10 |
| 10357345 E030049G20Rik | NM_172484    | 9.36224e-005 | -1.68009 | E15.5 * Wnt1 down vs E15.5 * Sox10 |
| 10514520 Cyp2j9        | NM_028979    | 3.92713e-005 | -1.68348 | E15.5 * Wnt1 down vs E15.5 * Sox10 |
| 10389795 Stxbp4        | NM_011505    | 0.00195765   | -1.69199 | E15.5 * Wnt1 down vs E15.5 * Sox10 |
| 10483249 Galnt3        | NM_015736    | 0.000365315  | -1.70789 | E15.5 * Wnt1 down vs E15.5 * Sox10 |
| 10385375 Thgl1         | NM_001080969 | 2.43514e-005 | -1.71305 | E15.5 * Wnt1 down vs E15.5 * Sox10 |
| 10559649 Cox6b2        | NM_183405    | 0.00149601   | -1.73266 | E15.5 * Wnt1 down vs E15.5 * Sox10 |
| 10555233               | ---          | 2.30345e-005 | -1.73485 | E15.5 * Wnt1 down vs E15.5 * Sox10 |
| 10577641 1810011O10Rik | NM_026931    | 0.00217709   | -1.76177 | E15.5 * Wnt1 down vs E15.5 * Sox10 |
| 10606333 Fndc3c1       | NM_001007580 | 3.7731e-005  | -1.76691 | E15.5 * Wnt1 down vs E15.5 * Sox10 |
| 10360684 Ephx1         | NM_010145    | 0.00305913   | -1.77455 | E15.5 * Wnt1 down vs E15.5 * Sox10 |
| 10530100 Arap2         | NM_178407    | 8.87522e-006 | -1.79838 | E15.5 * Wnt1 down vs E15.5 * Sox10 |
| 10450957 Cenpq         | NM_031863    | 6.14464e-006 | -1.79874 | E15.5 * Wnt1 down vs E15.5 * Sox10 |
| 10547657 C3ar1         | NM_009779    | 0.000356828  | -1.81197 | E15.5 * Wnt1 down vs E15.5 * Sox10 |
| 10364149 S100b         | NM_009115    | 5.29981e-005 | -1.83433 | E15.5 * Wnt1 down vs E15.5 * Sox10 |

|          |               |              |              |          |                                    |
|----------|---------------|--------------|--------------|----------|------------------------------------|
| 10495316 | Psrc1         | NM_019976    | 1.70742e-006 | -1.85122 | E15.5 * Wnt1 down vs E15.5 * Sox10 |
| 10424404 | Pvt1          | NR_003368    | 4.60863e-005 | -1.85856 | E15.5 * Wnt1 down vs E15.5 * Sox10 |
| 10496373 | Ddit4l        | NM_030143    | 0.000639171  | -1.85947 | E15.5 * Wnt1 down vs E15.5 * Sox10 |
| 10511631 | Slc26a7       | NM_145947    | 2.96818e-006 | -1.87629 | E15.5 * Wnt1 down vs E15.5 * Sox10 |
| 10520950 | Pdlim1        | NM_016861    | 2.68189e-006 | -1.88036 | E15.5 * Wnt1 down vs E15.5 * Sox10 |
| 10502655 | Cyr61         | NM_010516    | 0.0013656    | -1.88245 | E15.5 * Wnt1 down vs E15.5 * Sox10 |
| 10474467 | Muc15         | NM_172979    | 0.00184081   | -1.89595 | E15.5 * Wnt1 down vs E15.5 * Sox10 |
| 10425265 | ENSMUSG00000  | ENSMUST00000 | 5.05626e-005 | -1.90684 | E15.5 * Wnt1 down vs E15.5 * Sox10 |
| 10503259 | Trp53inp1     | NM_021897    | 2.94406e-008 | -1.91818 | E15.5 * Wnt1 down vs E15.5 * Sox10 |
| 10474524 | Olfr1318      | NM_001011802 | 7.35042e-006 | -1.92967 | E15.5 * Wnt1 down vs E15.5 * Sox10 |
| 10577623 | Gins4         | NM_024240    | 2.39305e-007 | -1.94913 | E15.5 * Wnt1 down vs E15.5 * Sox10 |
| 10472893 | B230120H23Rik | NM_023057    | 4.22584e-007 | -1.95102 | E15.5 * Wnt1 down vs E15.5 * Sox10 |
| 10485745 | Ano3          | NM_001128103 | 0.000592284  | -1.97009 | E15.5 * Wnt1 down vs E15.5 * Sox10 |
| 10416230 | Tnfrsf10b     | NM_020275    | 4.54587e-005 | -1.97523 | E15.5 * Wnt1 down vs E15.5 * Sox10 |
| 10450367 | Hspa1a        | NM_010479    | 0.000965668  | -1.97539 | E15.5 * Wnt1 down vs E15.5 * Sox10 |
| 10371506 | Stab2         | NM_138673    | 0.00234194   | -1.99097 | E15.5 * Wnt1 down vs E15.5 * Sox10 |
| 10356084 | Irs1          | NM_010570    | 2.86668e-006 | -2.00538 | E15.5 * Wnt1 down vs E15.5 * Sox10 |
| 10430447 | 1700088E04Rik | NM_138581    | 3.0106e-006  | -2.05816 | E15.5 * Wnt1 down vs E15.5 * Sox10 |
| 10436978 | Cbr3          | NM_173047    | 9.53445e-005 | -2.16451 | E15.5 * Wnt1 down vs E15.5 * Sox10 |
| 10565570 | 4632434I11Rik | NM_001080995 | 2.48583e-007 | -2.17055 | E15.5 * Wnt1 down vs E15.5 * Sox10 |
| 10604743 | Snord61       | NR_002903    | 0.0038026    | -2.23165 | E15.5 * Wnt1 down vs E15.5 * Sox10 |
| 10384145 | H2afv         | BC028539     | 3.56725e-008 | -2.24307 | E15.5 * Wnt1 down vs E15.5 * Sox10 |
| 10425257 | Polr2f        | NM_027231    | 4.90177e-006 | -2.2551  | E15.5 * Wnt1 down vs E15.5 * Sox10 |
| 10582580 | ---           | ---          | 3.64809e-005 | -2.35588 | E15.5 * Wnt1 down vs E15.5 * Sox10 |
| 10425240 | Micall1       | NM_177461    | 3.94689e-009 | -2.53071 | E15.5 * Wnt1 down vs E15.5 * Sox10 |
| 10385271 | Ccng1         | NM_009831    | 3.9261e-011  | -2.98432 | E15.5 * Wnt1 down vs E15.5 * Sox10 |
| 10605874 | Eda2r         | NM_175540    | 1.83176e-006 | -3.26152 | E15.5 * Wnt1 down vs E15.5 * Sox10 |
| 10443463 | Cdkn1a        | NM_007669    | 2.36993e-009 | -3.68721 | E15.5 * Wnt1 down vs E15.5 * Sox10 |
| 10485718 | Ano3          | NM_001128103 | 4.56038e-008 | -3.9725  | E15.5 * Wnt1 down vs E15.5 * Sox10 |

## W15 vs C15

| Probeset ID | Gene Symbol | RefSeq       | p-value      | Fold-change | Comparison                      |
|-------------|-------------|--------------|--------------|-------------|---------------------------------|
| 10593756    | Chrna3      | NM_145129    | 3.68322e-018 | 57.2612     | E15.5 * Wnt1 up vs E15.5 * Ctrl |
| 10515095    | Elavl4      | NM_010488    | 9.36054e-017 | 42.0578     | E15.5 * Wnt1 up vs E15.5 * Ctrl |
| 10463737    | Ina         | AK144917     | 1.20069e-013 | 35.8826     | E15.5 * Wnt1 up vs E15.5 * Ctrl |
| 10492640    | Fstl5       | NM_178673    | 2.55841e-015 | 34.0967     | E15.5 * Wnt1 up vs E15.5 * Ctrl |
| 10372324    | Syt1        | NM_009306    | 2.78761e-014 | 29.2443     | E15.5 * Wnt1 up vs E15.5 * Ctrl |
| 10576332    | Tubb3       | NM_023279    | 1.14223e-012 | 28.1712     | E15.5 * Wnt1 up vs E15.5 * Ctrl |
| 10536667    | Ptpnz1      | NM_001081306 | 3.48106e-016 | 27.124      | E15.5 * Wnt1 up vs E15.5 * Ctrl |
| 10463732    | Ina         | NM_146100    | 1.11843e-017 | 26.0165     | E15.5 * Wnt1 up vs E15.5 * Ctrl |
| 10595033    | Scg3        | NM_009130    | 1.08222e-016 | 25.9031     | E15.5 * Wnt1 up vs E15.5 * Ctrl |
| 10540298    | Chl1        | NM_007697    | 3.57063e-016 | 25.3792     | E15.5 * Wnt1 up vs E15.5 * Ctrl |
| 10531869    | Mapk10      | NM_009158    | 1.65179e-015 | 24.4878     | E15.5 * Wnt1 up vs E15.5 * Ctrl |
| 10473244    | Zfp804a     | NM_175513    | 2.14087e-015 | 22.2964     | E15.5 * Wnt1 up vs E15.5 * Ctrl |
| 10585484    | Chrna5      | NM_176844    | 2.54901e-014 | 21.675      | E15.5 * Wnt1 up vs E15.5 * Ctrl |
| 10357103    | Cdh19       | NM_001081386 | 4.40966e-012 | 20.5054     | E15.5 * Wnt1 up vs E15.5 * Ctrl |
| 10492169    | Mab21l1     | NM_010750    | 2.41877e-015 | 19.9722     | E15.5 * Wnt1 up vs E15.5 * Ctrl |
| 10536363    | Tac1        | NM_009311    | 1.70472e-010 | 18.9662     | E15.5 * Wnt1 up vs E15.5 * Ctrl |
| 10400926    | Rtn1        | NM_153457    | 2.07753e-014 | 18.7184     | E15.5 * Wnt1 up vs E15.5 * Ctrl |
| 10458685    | Jakmip2     | ENSMUST00000 | 1.51661e-012 | 18.6365     | E15.5 * Wnt1 up vs E15.5 * Ctrl |
| 10417628    | Cadps       | NM_012061    | 6.11704e-014 | 18.4928     | E15.5 * Wnt1 up vs E15.5 * Ctrl |
| 10593767    | Chrbn4      | NM_148944    | 3.13736e-013 | 17.961      | E15.5 * Wnt1 up vs E15.5 * Ctrl |
| 10402020    | Eml5        | NM_001081191 | 1.00639e-016 | 17.9415     | E15.5 * Wnt1 up vs E15.5 * Ctrl |
| 10436636    | Ncam2       | NM_001113208 | 1.27834e-012 | 17.6167     | E15.5 * Wnt1 up vs E15.5 * Ctrl |
| 10498885    | Gria2       | NM_013540    | 1.74683e-013 | 17.4958     | E15.5 * Wnt1 up vs E15.5 * Ctrl |
| 10492628    | Serpini1    | NM_009250    | 7.45155e-014 | 17.4605     | E15.5 * Wnt1 up vs E15.5 * Ctrl |
| 10522208    | Uchl1       | NM_011670    | 8.03718e-013 | 17.2938     | E15.5 * Wnt1 up vs E15.5 * Ctrl |
| 10564163    | Snord116    | NR_002895    | 6.9669e-010  | 17.1658     | E15.5 * Wnt1 up vs E15.5 * Ctrl |
| 10564167    | Snord116    | NR_002895    | 6.9669e-010  | 17.1658     | E15.5 * Wnt1 up vs E15.5 * Ctrl |
| 10564171    | Snord116    | NR_002895    | 6.9669e-010  | 17.1658     | E15.5 * Wnt1 up vs E15.5 * Ctrl |
| 10564173    | Snord116    | NR_002895    | 6.9669e-010  | 17.1658     | E15.5 * Wnt1 up vs E15.5 * Ctrl |
| 10564175    | Snord116    | NR_002895    | 6.9669e-010  | 17.1658     | E15.5 * Wnt1 up vs E15.5 * Ctrl |
| 10564179    | Snord116    | NR_002895    | 6.9669e-010  | 17.1658     | E15.5 * Wnt1 up vs E15.5 * Ctrl |
| 10564181    | Snord116    | NR_002895    | 6.9669e-010  | 17.1658     | E15.5 * Wnt1 up vs E15.5 * Ctrl |

|          |               |              |              |         |                                 |
|----------|---------------|--------------|--------------|---------|---------------------------------|
| 10564185 | Snord116      | NR_002895    | 6.9669e-010  | 17.1658 | E15.5 * Wnt1 up vs E15.5 * Ctrl |
| 10564187 | Snord116      | NR_002895    | 6.9669e-010  | 17.1658 | E15.5 * Wnt1 up vs E15.5 * Ctrl |
| 10564189 | Snord116      | NR_002895    | 6.9669e-010  | 17.1658 | E15.5 * Wnt1 up vs E15.5 * Ctrl |
| 10564191 | Snord116      | NR_002895    | 6.9669e-010  | 17.1658 | E15.5 * Wnt1 up vs E15.5 * Ctrl |
| 10564193 | Snord116      | NR_002895    | 6.9669e-010  | 17.1658 | E15.5 * Wnt1 up vs E15.5 * Ctrl |
| 10564195 | Snord116      | NR_002895    | 6.9669e-010  | 17.1658 | E15.5 * Wnt1 up vs E15.5 * Ctrl |
| 10564197 | Snord116      | NR_002895    | 6.9669e-010  | 17.1658 | E15.5 * Wnt1 up vs E15.5 * Ctrl |
| 10564199 | Snord116      | NR_002895    | 6.9669e-010  | 17.1658 | E15.5 * Wnt1 up vs E15.5 * Ctrl |
| 10564201 | Snord116      | AF241256     | 6.9669e-010  | 17.1658 | E15.5 * Wnt1 up vs E15.5 * Ctrl |
| 10564205 | Snord116      | AF241256     | 6.9669e-010  | 17.1658 | E15.5 * Wnt1 up vs E15.5 * Ctrl |
| 10564207 | Snord116      | AF241256     | 6.9669e-010  | 17.1658 | E15.5 * Wnt1 up vs E15.5 * Ctrl |
| 10483803 | 6720416L17Rik | ENSMUST00000 | 1.872e-014   | 16.9027 | E15.5 * Wnt1 up vs E15.5 * Ctrl |
| 10490818 | Stmn2         | NM_025285    | 1.42654e-014 | 16.8214 | E15.5 * Wnt1 up vs E15.5 * Ctrl |
| 10476512 | Snap25        | NM_011428    | 2.82087e-015 | 16.7296 | E15.5 * Wnt1 up vs E15.5 * Ctrl |
| 10564161 | Snord116      | NR_002895    | 5.61082e-010 | 16.7078 | E15.5 * Wnt1 up vs E15.5 * Ctrl |
| 10554900 | Dlg2          | NM_011807    | 1.07277e-015 | 16.443  | E15.5 * Wnt1 up vs E15.5 * Ctrl |
| 10605113 | L1cam         | NM_008478    | 3.47632e-015 | 16.1787 | E15.5 * Wnt1 up vs E15.5 * Ctrl |
| 10522388 | Slc10a4       | NM_173403    | 7.29087e-014 | 15.8163 | E15.5 * Wnt1 up vs E15.5 * Ctrl |
| 10346150 | Tmeff2        | NM_019790    | 7.67259e-017 | 15.785  | E15.5 * Wnt1 up vs E15.5 * Ctrl |
| 10418835 | Slc18a3       | NM_021712    | 9.81468e-012 | 15.7644 | E15.5 * Wnt1 up vs E15.5 * Ctrl |
| 10572024 | Spock3        | NM_023689    | 1.12014e-013 | 15.5978 | E15.5 * Wnt1 up vs E15.5 * Ctrl |
| 10564159 | Snord116      | AF241256     | 6.14517e-010 | 15.3133 | E15.5 * Wnt1 up vs E15.5 * Ctrl |
| 10465820 | Gng3          | NM_010316    | 3.59033e-013 | 15.2535 | E15.5 * Wnt1 up vs E15.5 * Ctrl |
| 10564177 | Snord116      | AF241256     | 9.43875e-010 | 15.0566 | E15.5 * Wnt1 up vs E15.5 * Ctrl |
| 10564183 | Snord116      | AF241256     | 5.89483e-010 | 14.9687 | E15.5 * Wnt1 up vs E15.5 * Ctrl |
| 10499431 | Syt11         | NM_018804    | 5.18846e-015 | 14.7763 | E15.5 * Wnt1 up vs E15.5 * Ctrl |
| 10547227 | Ret           | NM_001080780 | 9.25503e-015 | 14.574  | E15.5 * Wnt1 up vs E15.5 * Ctrl |
| 10366163 | Slc6a15       | NM_175328    | 1.09737e-012 | 14.3611 | E15.5 * Wnt1 up vs E15.5 * Ctrl |
| 10564165 | Snord116      | AF241256     | 1.17594e-009 | 13.8116 | E15.5 * Wnt1 up vs E15.5 * Ctrl |
| 10584549 | Scn3b         | NM_178227    | 6.16077e-014 | 13.5471 | E15.5 * Wnt1 up vs E15.5 * Ctrl |
| 10439695 | Tagln3        | NM_019754    | 1.02613e-014 | 13.2152 | E15.5 * Wnt1 up vs E15.5 * Ctrl |
| 10439514 | Gap43         | NM_008083    | 6.95935e-016 | 12.8654 | E15.5 * Wnt1 up vs E15.5 * Ctrl |
| 10506360 | Sgip1         | NM_144906    | 3.96134e-017 | 12.8303 | E15.5 * Wnt1 up vs E15.5 * Ctrl |
| 10367582 | Vip           | NM_011702    | 1.79122e-012 | 12.5651 | E15.5 * Wnt1 up vs E15.5 * Ctrl |
| 10483228 | Scn3a         | NM_018732    | 1.63011e-013 | 12.4168 | E15.5 * Wnt1 up vs E15.5 * Ctrl |
| 10575693 | Vat1l         | NM_173016    | 9.76018e-014 | 12.3239 | E15.5 * Wnt1 up vs E15.5 * Ctrl |
| 10564169 | Snord116      | AF241256     | 1.53666e-009 | 12.0078 | E15.5 * Wnt1 up vs E15.5 * Ctrl |
| 10408359 | Nrsn1         | NM_009513    | 9.05878e-013 | 11.9868 | E15.5 * Wnt1 up vs E15.5 * Ctrl |
| 10464471 | Gal           | NM_010253    | 1.25239e-010 | 11.805  | E15.5 * Wnt1 up vs E15.5 * Ctrl |
| 10344973 | Gdap1         | NM_010267    | 1.85703e-011 | 11.7746 | E15.5 * Wnt1 up vs E15.5 * Ctrl |
| 10431659 | Kif21a        | NM_001109040 | 1.40153e-015 | 11.6784 | E15.5 * Wnt1 up vs E15.5 * Ctrl |
| 10428509 | Csmd3         | NM_001081391 | 4.60129e-007 | 11.5046 | E15.5 * Wnt1 up vs E15.5 * Ctrl |
| 10472374 | Scn9a         | BC172147     | 1.94279e-010 | 11.4478 | E15.5 * Wnt1 up vs E15.5 * Ctrl |
| 10471154 | Ass1          | NM_007494    | 4.66792e-012 | 11.4436 | E15.5 * Wnt1 up vs E15.5 * Ctrl |
| 10363541 | Ass1          | NM_007494    | 2.56318e-012 | 11.411  | E15.5 * Wnt1 up vs E15.5 * Ctrl |
| 10362372 | 9330159F19Rik | BC138282     | 2.08601e-012 | 11.1956 | E15.5 * Wnt1 up vs E15.5 * Ctrl |
| 10607156 | Dcx           | NM_001110222 | 4.0625e-013  | 11.1571 | E15.5 * Wnt1 up vs E15.5 * Ctrl |
| 10474096 | Lrrc4c        | NM_178725    | 7.12842e-015 | 11.0223 | E15.5 * Wnt1 up vs E15.5 * Ctrl |
| 10471994 | Kif5c         | NM_008449    | 8.47086e-014 | 10.9313 | E15.5 * Wnt1 up vs E15.5 * Ctrl |
| 10416090 | Stmn4         | NM_019675    | 4.71557e-012 | 10.9135 | E15.5 * Wnt1 up vs E15.5 * Ctrl |
| 10458663 | Dpysl3        | NM_009468    | 4.03794e-015 | 10.8271 | E15.5 * Wnt1 up vs E15.5 * Ctrl |
| 10442069 | Lix1          | NM_025681    | 3.89666e-011 | 10.7699 | E15.5 * Wnt1 up vs E15.5 * Ctrl |
| 10411527 | Cartpt        | NM_013732    | 1.71707e-009 | 10.6847 | E15.5 * Wnt1 up vs E15.5 * Ctrl |
| 10567289 | Syt17         | NM_138649    | 3.93747e-014 | 10.6517 | E15.5 * Wnt1 up vs E15.5 * Ctrl |
| 10514352 | Elavl2        | NM_207685    | 1.6817e-013  | 10.6487 | E15.5 * Wnt1 up vs E15.5 * Ctrl |
| 10492136 | Dclk1         | NM_019978    | 1.7649e-015  | 10.4873 | E15.5 * Wnt1 up vs E15.5 * Ctrl |
| 10485979 | Gjd2          | NM_010290    | 1.77481e-009 | 9.92177 | E15.5 * Wnt1 up vs E15.5 * Ctrl |
| 10455942 | A730017C20Rik | NM_173759    | 1.6478e-012  | 9.70107 | E15.5 * Wnt1 up vs E15.5 * Ctrl |
| 10476628 | Otor          | NM_020595    | 1.38378e-012 | 9.67486 | E15.5 * Wnt1 up vs E15.5 * Ctrl |
| 10402061 | Eml5          | BC049855     | 1.61347e-011 | 9.61354 | E15.5 * Wnt1 up vs E15.5 * Ctrl |
| 10521498 | Crmp1         | NM_007765    | 1.47908e-013 | 9.61023 | E15.5 * Wnt1 up vs E15.5 * Ctrl |
| 10472400 | Scn2a1        | NM_001099298 | 5.16521e-007 | 9.45366 | E15.5 * Wnt1 up vs E15.5 * Ctrl |
| 10485955 | Scg5          | NM_009162    | 1.47602e-014 | 9.43953 | E15.5 * Wnt1 up vs E15.5 * Ctrl |
| 10355836 | Rsp18         | NM_009049    | 1.57932e-012 | 9.32966 | E15.5 * Wnt1 up vs E15.5 * Ctrl |
| 10453518 | Nrxn1         | NM_020252    | 7.75798e-012 | 9.27864 | E15.5 * Wnt1 up vs E15.5 * Ctrl |
| 10347036 | Mtap2         | NM_001039934 | 1.1573e-016  | 9.09719 | E15.5 * Wnt1 up vs E15.5 * Ctrl |

|                        |              |              |         |                                 |
|------------------------|--------------|--------------|---------|---------------------------------|
| 10534960 Gje1          | NM_080450    | 2.23297e-010 | 9.0516  | E15.5 * Wnt1 up vs E15.5 * Ctrl |
| 10464370 Slc18a2       | NM_172523    | 1.66625e-013 | 9.03062 | E15.5 * Wnt1 up vs E15.5 * Ctrl |
| 10411274 Sv2c          | NM_029210    | 9.02971e-014 | 8.902   | E15.5 * Wnt1 up vs E15.5 * Ctrl |
| 10418921 Sncg          | NM_011430    | 3.18098e-012 | 8.868   | E15.5 * Wnt1 up vs E15.5 * Ctrl |
| 10483326 Scn9a         | NM_018852    | 8.67147e-012 | 8.72389 | E15.5 * Wnt1 up vs E15.5 * Ctrl |
| 10604751 Fgf13         | NM_010200    | 6.60785e-011 | 8.71634 | E15.5 * Wnt1 up vs E15.5 * Ctrl |
| 10431812 Nell2         | NM_016743    | 1.05537e-013 | 8.6345  | E15.5 * Wnt1 up vs E15.5 * Ctrl |
| 10421100 Nefm          | NM_008691    | 1.98813e-016 | 8.5597  | E15.5 * Wnt1 up vs E15.5 * Ctrl |
| 10426656 Prph          | NM_013639    | 1.82696e-013 | 8.47914 | E15.5 * Wnt1 up vs E15.5 * Ctrl |
| 10494069 Tnrc4         | NM_172434    | 1.86924e-009 | 8.42772 | E15.5 * Wnt1 up vs E15.5 * Ctrl |
| 10350951 Tnr           | NM_022312    | 8.08306e-013 | 8.34672 | E15.5 * Wnt1 up vs E15.5 * Ctrl |
| 10413461 Erc2          | NM_177814    | 1.75274e-012 | 8.29396 | E15.5 * Wnt1 up vs E15.5 * Ctrl |
| 10588283 Rab6b         | NM_173781    | 9.47185e-011 | 8.26147 | E15.5 * Wnt1 up vs E15.5 * Ctrl |
| 10368999 Grik2         | NM_010349    | 4.60352e-013 | 8.25664 | E15.5 * Wnt1 up vs E15.5 * Ctrl |
| 10503416 Calb1         | NM_009788    | 2.53027e-013 | 8.24463 | E15.5 * Wnt1 up vs E15.5 * Ctrl |
| 10433431               | ---          | 8.675e-006   | 8.07237 | E15.5 * Wnt1 up vs E15.5 * Ctrl |
| 10359113 Fam163a       | NM_177838    | 7.10162e-011 | 7.98286 | E15.5 * Wnt1 up vs E15.5 * Ctrl |
| 10479698 Myt1          | NM_008665    | 4.87351e-012 | 7.92744 | E15.5 * Wnt1 up vs E15.5 * Ctrl |
| 10469577 ENSMUSG0000C  | ENSMUST00000 | 3.44767e-011 | 7.91795 | E15.5 * Wnt1 up vs E15.5 * Ctrl |
| 10530306 Phox2b        | NM_008888    | 1.94523e-012 | 7.87775 | E15.5 * Wnt1 up vs E15.5 * Ctrl |
| 10412066 Rab3c         | NM_023852    | 3.73715e-012 | 7.86976 | E15.5 * Wnt1 up vs E15.5 * Ctrl |
| 10545538 Ctnna2        | NM_009819    | 2.62017e-012 | 7.85746 | E15.5 * Wnt1 up vs E15.5 * Ctrl |
| 10353192 Eya1          | NM_010164    | 4.24921e-012 | 7.81819 | E15.5 * Wnt1 up vs E15.5 * Ctrl |
| 10406461 C130071C03Rik | ENSMUST00000 | 3.66937e-011 | 7.75892 | E15.5 * Wnt1 up vs E15.5 * Ctrl |
| 10606174 Nap1l2        | NM_008671    | 1.58757e-010 | 7.72966 | E15.5 * Wnt1 up vs E15.5 * Ctrl |
| 10451838 Slc5a7        | NM_022025    | 2.36336e-011 | 7.71995 | E15.5 * Wnt1 up vs E15.5 * Ctrl |
| 10490665 Stmn3         | NM_009133    | 1.02818e-012 | 7.6703  | E15.5 * Wnt1 up vs E15.5 * Ctrl |
| 10497663 Slc7a14       | NM_172861    | 9.51067e-013 | 7.64687 | E15.5 * Wnt1 up vs E15.5 * Ctrl |
| 10355960 Scg2          | NM_009129    | 2.70794e-010 | 7.59689 | E15.5 * Wnt1 up vs E15.5 * Ctrl |
| 10395553 Nrcam         | NM_176930    | 4.00217e-013 | 7.43253 | E15.5 * Wnt1 up vs E15.5 * Ctrl |
| 10575019 ENSMUSG0000C  | ENSMUST00000 | 2.68033e-007 | 7.42899 | E15.5 * Wnt1 up vs E15.5 * Ctrl |
| 10428515 Csmd3         | NM_001081391 | 4.51613e-009 | 7.33348 | E15.5 * Wnt1 up vs E15.5 * Ctrl |
| 10595013 Tmod2         | NM_016711    | 4.47312e-015 | 7.27407 | E15.5 * Wnt1 up vs E15.5 * Ctrl |
| 10599841 C230004F18Rik | ENSMUST00000 | 1.63656e-010 | 7.23922 | E15.5 * Wnt1 up vs E15.5 * Ctrl |
| 10599187 Zcchc12       | NM_028325    | 3.52971e-012 | 7.22389 | E15.5 * Wnt1 up vs E15.5 * Ctrl |
| 10483324 Scn9a         | NM_018852    | 1.24776e-010 | 7.19247 | E15.5 * Wnt1 up vs E15.5 * Ctrl |
| 10436623 Chodl         | NM_139134    | 3.87171e-009 | 7.17633 | E15.5 * Wnt1 up vs E15.5 * Ctrl |
| 10456237 St8sia3       | NM_009182    | 1.10491e-011 | 7.1469  | E15.5 * Wnt1 up vs E15.5 * Ctrl |
| 10458052 Epb4.114a     | NM_013512    | 5.1048e-014  | 7.13987 | E15.5 * Wnt1 up vs E15.5 * Ctrl |
| 10594048 Islr2         | NM_177193    | 4.57148e-012 | 7.08939 | E15.5 * Wnt1 up vs E15.5 * Ctrl |
| 10495878 Ndst4         | NM_022565    | 5.14098e-009 | 7.08135 | E15.5 * Wnt1 up vs E15.5 * Ctrl |
| 10385283 Gabrg2        | NM_008073    | 2.98743e-011 | 7.06013 | E15.5 * Wnt1 up vs E15.5 * Ctrl |
| 10363146 Slc35f1       | NM_178675    | 4.92571e-011 | 7.03191 | E15.5 * Wnt1 up vs E15.5 * Ctrl |
| 10563858 Gabrg3        | NM_008074    | 3.03513e-011 | 7.02148 | E15.5 * Wnt1 up vs E15.5 * Ctrl |
| 10595496 Snap91        | NM_013669    | 2.42797e-011 | 6.9366  | E15.5 * Wnt1 up vs E15.5 * Ctrl |
| 10530499 EG545758      | NM_001024147 | 2.58015e-012 | 6.93433 | E15.5 * Wnt1 up vs E15.5 * Ctrl |
| 10397912 9030205A07Rik | AB257853     | 5.64839e-014 | 6.9251  | E15.5 * Wnt1 up vs E15.5 * Ctrl |
| 10355259 Myl1          | NM_021285    | 5.10869e-010 | 6.91029 | E15.5 * Wnt1 up vs E15.5 * Ctrl |
| 10396125 At1l          | NM_178628    | 2.61149e-011 | 6.86321 | E15.5 * Wnt1 up vs E15.5 * Ctrl |
| 10369835 Phyhipl       | NM_178621    | 2.03267e-012 | 6.81726 | E15.5 * Wnt1 up vs E15.5 * Ctrl |
| 10456353 Grp           | NM_175012    | 1.6205e-010  | 6.7869  | E15.5 * Wnt1 up vs E15.5 * Ctrl |
| 10501468 Ntnng1        | NM_030699    | 1.41228e-011 | 6.77294 | E15.5 * Wnt1 up vs E15.5 * Ctrl |
| 10495623 ENSMUSG0000C  | ENSMUST00000 | 5.25618e-009 | 6.75089 | E15.5 * Wnt1 up vs E15.5 * Ctrl |
| 10494043 Tdrkh         | NM_028307    | 5.25957e-013 | 6.66719 | E15.5 * Wnt1 up vs E15.5 * Ctrl |
| 10351400 Fam78b        | NM_175461    | 1.2323e-012  | 6.66256 | E15.5 * Wnt1 up vs E15.5 * Ctrl |
| 10423855 Rims2         | NM_053271    | 2.15207e-012 | 6.63462 | E15.5 * Wnt1 up vs E15.5 * Ctrl |
| 10508052 Grik3         | NM_001081097 | 9.64108e-011 | 6.60492 | E15.5 * Wnt1 up vs E15.5 * Ctrl |
| 10585048 Cadm1         | NM_207675    | 1.52241e-015 | 6.59627 | E15.5 * Wnt1 up vs E15.5 * Ctrl |
| 10362363 6330407J23Rik | NM_026138    | 8.24202e-013 | 6.58516 | E15.5 * Wnt1 up vs E15.5 * Ctrl |
| 10472372 Scn2a1        | NM_001099298 | 6.24485e-011 | 6.55082 | E15.5 * Wnt1 up vs E15.5 * Ctrl |
| 10584259 Fez1          | NM_183171    | 4.92397e-015 | 6.52743 | E15.5 * Wnt1 up vs E15.5 * Ctrl |
| 10428522 Csmd3         | NM_001081391 | 1.36606e-009 | 6.46778 | E15.5 * Wnt1 up vs E15.5 * Ctrl |
| 10363921 Pcdh15        | NM_023115    | 1.47828e-011 | 6.45579 | E15.5 * Wnt1 up vs E15.5 * Ctrl |
| 10533055 1500001A10Rik | NM_026886    | 1.85637e-014 | 6.45186 | E15.5 * Wnt1 up vs E15.5 * Ctrl |
| 10485309 E530001K10Rik | ENSMUST00000 | 1.35795e-008 | 6.44758 | E15.5 * Wnt1 up vs E15.5 * Ctrl |
| 10483215 Scn3a         | NM_018732    | 2.33941e-011 | 6.43239 | E15.5 * Wnt1 up vs E15.5 * Ctrl |

|                        |               |              |         |                                 |
|------------------------|---------------|--------------|---------|---------------------------------|
| 10500114 Mlt11         | NM_019914     | 4.35608e-015 | 6.40057 | E15.5 * Wnt1 up vs E15.5 * Ctrl |
| 10421934 Khl1          | NM_053105     | 1.52132e-011 | 6.35435 | E15.5 * Wnt1 up vs E15.5 * Ctrl |
| 10419049 Nrg3          | NM_008734     | 1.13081e-010 | 6.24329 | E15.5 * Wnt1 up vs E15.5 * Ctrl |
| 10422537 Nalc1         | NM_177393     | 6.83327e-013 | 6.23771 | E15.5 * Wnt1 up vs E15.5 * Ctrl |
| 10436658 7120432105Rik | AK148667      | 4.10823e-007 | 6.19028 | E15.5 * Wnt1 up vs E15.5 * Ctrl |
| 10529937 Kcnp4         | NM_030265     | 5.76006e-012 | 6.14248 | E15.5 * Wnt1 up vs E15.5 * Ctrl |
| 10472398 Scn2a1        | NM_001099298  | 3.38957e-007 | 6.13541 | E15.5 * Wnt1 up vs E15.5 * Ctrl |
| 10564211 Snrpn         | NM_013670     | 1.59159e-016 | 6.06582 | E15.5 * Wnt1 up vs E15.5 * Ctrl |
| 10455374 Stk32a        | NM_178749     | 1.38713e-012 | 5.99779 | E15.5 * Wnt1 up vs E15.5 * Ctrl |
| 10445879 Kcnnh8        | NM_001031811  | 5.68014e-010 | 5.99652 | E15.5 * Wnt1 up vs E15.5 * Ctrl |
| 10407841 Hecw1         | NM_001081348  | 1.63789e-009 | 5.9823  | E15.5 * Wnt1 up vs E15.5 * Ctrl |
| 10522976 Ruffy3        | NM_027530     | 5.32712e-016 | 5.97573 | E15.5 * Wnt1 up vs E15.5 * Ctrl |
| 10349208 Cntnap5a      | NM_001077425  | 7.11423e-012 | 5.92471 | E15.5 * Wnt1 up vs E15.5 * Ctrl |
| 10555197 Mtap6         | NM_010837     | 1.23197e-013 | 5.8956  | E15.5 * Wnt1 up vs E15.5 * Ctrl |
| 10427862 Cdh6          | NM_007666     | 1.43402e-013 | 5.8847  | E15.5 * Wnt1 up vs E15.5 * Ctrl |
| 10363224 Fabp7         | NM_021272     | 8.40975e-012 | 5.83305 | E15.5 * Wnt1 up vs E15.5 * Ctrl |
| 10525016 Tbx3          | NM_011535     | 1.73461e-015 | 5.79947 | E15.5 * Wnt1 up vs E15.5 * Ctrl |
| 10503180 Chd7          | NM_001081417  | 3.94553e-012 | 5.74286 | E15.5 * Wnt1 up vs E15.5 * Ctrl |
| 10553773 Gabrb3        | NM_008071     | 2.77177e-013 | 5.72372 | E15.5 * Wnt1 up vs E15.5 * Ctrl |
| 10519770 Pclo          | NM_011995     | 1.02136e-011 | 5.718   | E15.5 * Wnt1 up vs E15.5 * Ctrl |
| 10350506 Fam5c         | NM_153539     | 6.68362e-012 | 5.69339 | E15.5 * Wnt1 up vs E15.5 * Ctrl |
| 10472809 Dlx1          | NM_010053     | 8.53452e-013 | 5.69287 | E15.5 * Wnt1 up vs E15.5 * Ctrl |
| 10435765               | ---           | 4.48966e-007 | 5.66954 | E15.5 * Wnt1 up vs E15.5 * Ctrl |
| 10468452 Sorcs1        | NM_021377     | 1.15744e-013 | 5.64207 | E15.5 * Wnt1 up vs E15.5 * Ctrl |
| 10474814 Disp2         | NM_170593     | 1.10428e-010 | 5.63539 | E15.5 * Wnt1 up vs E15.5 * Ctrl |
| 10373467 Erbb3         | NM_010153     | 2.13015e-010 | 5.53011 | E15.5 * Wnt1 up vs E15.5 * Ctrl |
| 10419060               | ---           | 0.00076464   | 5.46978 | E15.5 * Wnt1 up vs E15.5 * Ctrl |
| 10503234 Rlbp1l1       | NM_028940     | 6.0136e-014  | 5.46801 | E15.5 * Wnt1 up vs E15.5 * Ctrl |
| 10439362 Stxbp5l       | NM_172440     | 3.51081e-011 | 5.44768 | E15.5 * Wnt1 up vs E15.5 * Ctrl |
| 10457644 Cdh2          | NM_007664     | 2.04791e-016 | 5.42684 | E15.5 * Wnt1 up vs E15.5 * Ctrl |
| 10389590 Gdpd1         | NM_025638     | 1.96958e-012 | 5.42512 | E15.5 * Wnt1 up vs E15.5 * Ctrl |
| 10373113 Kif5a         | NM_008447     | 1.57087e-010 | 5.38792 | E15.5 * Wnt1 up vs E15.5 * Ctrl |
| 10501555 Amy1          | NM_007446     | 1.1666e-007  | 5.37799 | E15.5 * Wnt1 up vs E15.5 * Ctrl |
| 10423243 Cdh10         | NM_009865     | 6.28914e-010 | 5.35963 | E15.5 * Wnt1 up vs E15.5 * Ctrl |
| 10491477 Sox2          | NM_011443     | 9.45792e-009 | 5.35901 | E15.5 * Wnt1 up vs E15.5 * Ctrl |
| 10411519 Mtap1b        | NM_008634     | 6.88336e-013 | 5.35776 | E15.5 * Wnt1 up vs E15.5 * Ctrl |
| 10347781 9430031J16Rik | BC082310      | 4.36568e-011 | 5.35488 | E15.5 * Wnt1 up vs E15.5 * Ctrl |
| 10520527 Dpysl5        | NM_023047     | 9.83675e-012 | 5.34481 | E15.5 * Wnt1 up vs E15.5 * Ctrl |
| 10360418 Rgs7          | NM_011880     | 7.16662e-010 | 5.31104 | E15.5 * Wnt1 up vs E15.5 * Ctrl |
| 10432675 1730030J21Rik | ENSMUST000001 | 4.15133e-007 | 5.30647 | E15.5 * Wnt1 up vs E15.5 * Ctrl |
| 10344679 Stt18         | NM_173868     | 1.62296e-011 | 5.29488 | E15.5 * Wnt1 up vs E15.5 * Ctrl |
| 10499988 2310007A19Rik | NM_025506     | 7.32337e-007 | 5.29074 | E15.5 * Wnt1 up vs E15.5 * Ctrl |
| 10355225 ENSMUSG000001 | ENSMUST000001 | 1.95632e-010 | 5.25788 | E15.5 * Wnt1 up vs E15.5 * Ctrl |
| 10408613 Tubb2b        | NM_023716     | 8.21935e-010 | 5.25564 | E15.5 * Wnt1 up vs E15.5 * Ctrl |
| 10354229 2610017109Rik | BC058417      | 6.62947e-010 | 5.23644 | E15.5 * Wnt1 up vs E15.5 * Ctrl |
| 10462912 Lgi1          | NM_020278     | 1.02542e-006 | 5.19929 | E15.5 * Wnt1 up vs E15.5 * Ctrl |
| 10603266 Nudt10        | NM_001031664  | 7.03139e-006 | 5.15915 | E15.5 * Wnt1 up vs E15.5 * Ctrl |
| 10530319 Atp8a1        | NM_001038999  | 6.32009e-016 | 5.13152 | E15.5 * Wnt1 up vs E15.5 * Ctrl |
| 10418092 A830039N20Rik | BC038501      | 2.24867e-008 | 5.11775 | E15.5 * Wnt1 up vs E15.5 * Ctrl |
| 10350438 Kcnt2         | NM_001081027  | 5.50717e-009 | 5.11    | E15.5 * Wnt1 up vs E15.5 * Ctrl |
| 10593245 Htr3b         | NM_020274     | 2.73539e-010 | 5.09653 | E15.5 * Wnt1 up vs E15.5 * Ctrl |
| 10599884               | ---           | 1.80808e-005 | 5.08524 | E15.5 * Wnt1 up vs E15.5 * Ctrl |
| 10488387 Napb          | NM_019632     | 1.62044e-012 | 5.08314 | E15.5 * Wnt1 up vs E15.5 * Ctrl |
| 10503198 Chd7          | NM_001081417  | 2.20189e-010 | 5.06011 | E15.5 * Wnt1 up vs E15.5 * Ctrl |
| 10359480 Dnm3          | NM_001038619  | 1.18174e-011 | 5.01312 | E15.5 * Wnt1 up vs E15.5 * Ctrl |
| 10474373 Kcna4         | NM_021275     | 4.63186e-009 | 4.99659 | E15.5 * Wnt1 up vs E15.5 * Ctrl |
| 10490856 Raly1         | NM_178631     | 3.1913e-011  | 4.97253 | E15.5 * Wnt1 up vs E15.5 * Ctrl |
| 10411395 Rgnf          | NM_012026     | 2.64607e-012 | 4.95885 | E15.5 * Wnt1 up vs E15.5 * Ctrl |
| 10472386 Scn2a1        | NM_001099298  | 3.75776e-009 | 4.92827 | E15.5 * Wnt1 up vs E15.5 * Ctrl |
| 10503194 Chd7          | NM_001081417  | 3.64934e-009 | 4.91459 | E15.5 * Wnt1 up vs E15.5 * Ctrl |
| 10395702 Akap6         | NM_198111     | 1.20255e-013 | 4.9123  | E15.5 * Wnt1 up vs E15.5 * Ctrl |
| 10503176 Chd7          | NM_001081417  | 4.47027e-012 | 4.89956 | E15.5 * Wnt1 up vs E15.5 * Ctrl |
| 10406782 Fam169a       | NM_001100458  | 7.58544e-009 | 4.89109 | E15.5 * Wnt1 up vs E15.5 * Ctrl |
| 10457820 Nola          | NM_199024     | 1.41455e-010 | 4.88587 | E15.5 * Wnt1 up vs E15.5 * Ctrl |
| 10568109 Asphd1        | NM_001039645  | 4.73304e-011 | 4.87862 | E15.5 * Wnt1 up vs E15.5 * Ctrl |
| 10440465               | ---           | 9.17229e-006 | 4.82576 | E15.5 * Wnt1 up vs E15.5 * Ctrl |

|          |               |               |              |         |                                 |
|----------|---------------|---------------|--------------|---------|---------------------------------|
| 10423358 | March11       | NM_177597     | 2.395e-006   | 4.79004 | E15.5 * Wnt1 up vs E15.5 * Ctrl |
| 10543058 | Dlx5          | NM_010056     | 4.01573e-008 | 4.78075 | E15.5 * Wnt1 up vs E15.5 * Ctrl |
| 10356712 | Kif1a         | NM_008440     | 2.13744e-013 | 4.76771 | E15.5 * Wnt1 up vs E15.5 * Ctrl |
| 10472402 | Scn2a1        | NM_001099298  | 8.63298e-010 | 4.748   | E15.5 * Wnt1 up vs E15.5 * Ctrl |
| 10519612 | 9330182L06Rik | NM_172706     | 6.40699e-011 | 4.72431 | E15.5 * Wnt1 up vs E15.5 * Ctrl |
| 10356154 | Sphkap        | NM_172430     | 3.18838e-009 | 4.72116 | E15.5 * Wnt1 up vs E15.5 * Ctrl |
| 10362005 | Ahi1          | NM_026203     | 1.97292e-011 | 4.70311 | E15.5 * Wnt1 up vs E15.5 * Ctrl |
| 10571599 | ---           | ---           | 1.10047e-007 | 4.69011 | E15.5 * Wnt1 up vs E15.5 * Ctrl |
| 10370242 | Pcbp3         | NM_021568     | 6.59678e-013 | 4.68762 | E15.5 * Wnt1 up vs E15.5 * Ctrl |
| 10503200 | Chd7          | NM_001081417  | 2.33023e-010 | 4.68346 | E15.5 * Wnt1 up vs E15.5 * Ctrl |
| 10503186 | Chd7          | NM_001081417  | 9.80816e-013 | 4.6676  | E15.5 * Wnt1 up vs E15.5 * Ctrl |
| 10392484 | Abca8b        | NM_013851     | 1.15982e-008 | 4.66697 | E15.5 * Wnt1 up vs E15.5 * Ctrl |
| 10426244 | Mapk8ip2      | NM_021921     | 1.29631e-009 | 4.65838 | E15.5 * Wnt1 up vs E15.5 * Ctrl |
| 10503172 | Chd7          | NM_001081417  | 6.0156e-007  | 4.64598 | E15.5 * Wnt1 up vs E15.5 * Ctrl |
| 10571399 | Zdhhc2        | NM_178395     | 3.99467e-010 | 4.63503 | E15.5 * Wnt1 up vs E15.5 * Ctrl |
| 10374356 | Vstm2a        | NM_145967     | 3.04665e-009 | 4.63453 | E15.5 * Wnt1 up vs E15.5 * Ctrl |
| 10366457 | Ptpr          | NM_011217     | 4.42471e-011 | 4.60871 | E15.5 * Wnt1 up vs E15.5 * Ctrl |
| 10548030 | Cd9           | NM_007657     | 3.44132e-010 | 4.59716 | E15.5 * Wnt1 up vs E15.5 * Ctrl |
| 10568107 | ---           | ---           | 1.86528e-006 | 4.5926  | E15.5 * Wnt1 up vs E15.5 * Ctrl |
| 10591706 | Elavl3        | NM_010487     | 6.05492e-010 | 4.58724 | E15.5 * Wnt1 up vs E15.5 * Ctrl |
| 10454369 | Fhod3         | NM_175276     | 5.9079e-011  | 4.57965 | E15.5 * Wnt1 up vs E15.5 * Ctrl |
| 10602805 | Mtap7d2       | NM_001081124  | 1.79747e-011 | 4.57794 | E15.5 * Wnt1 up vs E15.5 * Ctrl |
| 10487139 | Shc4          | NM_199022     | 3.65814e-013 | 4.56536 | E15.5 * Wnt1 up vs E15.5 * Ctrl |
| 10428517 | Csmd3         | NM_001081391  | 2.40734e-011 | 4.55248 | E15.5 * Wnt1 up vs E15.5 * Ctrl |
| 10592420 | AW551984      | NM_178737     | 1.68762e-012 | 4.54868 | E15.5 * Wnt1 up vs E15.5 * Ctrl |
| 10503184 | Chd7          | NM_001081417  | 1.18876e-013 | 4.53108 | E15.5 * Wnt1 up vs E15.5 * Ctrl |
| 10606835 | Bex2          | NM_009749     | 4.14891e-011 | 4.51498 | E15.5 * Wnt1 up vs E15.5 * Ctrl |
| 10503196 | Chd7          | NM_001081417  | 5.87725e-011 | 4.5141  | E15.5 * Wnt1 up vs E15.5 * Ctrl |
| 10529903 | Fam184b       | NM_021416     | 8.12828e-010 | 4.5123  | E15.5 * Wnt1 up vs E15.5 * Ctrl |
| 10503182 | Chd7          | NM_001081417  | 8.44264e-014 | 4.50013 | E15.5 * Wnt1 up vs E15.5 * Ctrl |
| 10472396 | Scn2a1        | NM_001099298  | 1.28594e-008 | 4.4895  | E15.5 * Wnt1 up vs E15.5 * Ctrl |
| 10368101 | D10Bwg1379e   | NM_001033258  | 8.71368e-012 | 4.48521 | E15.5 * Wnt1 up vs E15.5 * Ctrl |
| 10564011 | Snord115      | AF357427      | 7.18154e-010 | 4.47631 | E15.5 * Wnt1 up vs E15.5 * Ctrl |
| 10563913 | ---           | ---           | 8.95698e-010 | 4.47505 | E15.5 * Wnt1 up vs E15.5 * Ctrl |
| 10563917 | ---           | ---           | 8.95698e-010 | 4.47505 | E15.5 * Wnt1 up vs E15.5 * Ctrl |
| 10563923 | 100040985     | XM_001475615  | 8.95698e-010 | 4.47505 | E15.5 * Wnt1 up vs E15.5 * Ctrl |
| 10400609 | Mdga2         | NM_207010     | 6.36412e-011 | 4.44599 | E15.5 * Wnt1 up vs E15.5 * Ctrl |
| 10543802 | Plxna4        | NM_175750     | 8.60272e-012 | 4.44598 | E15.5 * Wnt1 up vs E15.5 * Ctrl |
| 10526559 | Ache          | NM_009599     | 1.01138e-008 | 4.41596 | E15.5 * Wnt1 up vs E15.5 * Ctrl |
| 10480492 | Cacna1b       | NM_001042528  | 3.68552e-014 | 4.3955  | E15.5 * Wnt1 up vs E15.5 * Ctrl |
| 10601888 | Plp1          | NM_011123     | 2.73043e-009 | 4.38939 | E15.5 * Wnt1 up vs E15.5 * Ctrl |
| 10586591 | Car12         | NM_178396     | 9.97956e-011 | 4.37721 | E15.5 * Wnt1 up vs E15.5 * Ctrl |
| 10503902 | Cnr1          | NM_007726     | 1.4754e-010  | 4.3577  | E15.5 * Wnt1 up vs E15.5 * Ctrl |
| 10598236 | Nudt11        | NM_021431     | 2.97562e-009 | 4.3535  | E15.5 * Wnt1 up vs E15.5 * Ctrl |
| 10375019 | Nsg2          | NM_008741     | 6.71764e-011 | 4.34577 | E15.5 * Wnt1 up vs E15.5 * Ctrl |
| 10478374 | Gdap1l1       | NM_144891     | 2.30602e-011 | 4.34116 | E15.5 * Wnt1 up vs E15.5 * Ctrl |
| 10380641 | Hoxb5         | NM_008268     | 1.73139e-014 | 4.30643 | E15.5 * Wnt1 up vs E15.5 * Ctrl |
| 10395074 | Myt1l         | NM_001093775  | 5.01655e-014 | 4.30091 | E15.5 * Wnt1 up vs E15.5 * Ctrl |
| 10417787 | Gng2          | NM_010315     | 1.17099e-013 | 4.27991 | E15.5 * Wnt1 up vs E15.5 * Ctrl |
| 10518585 | Kif1b         | NM_207682     | 3.66709e-014 | 4.26483 | E15.5 * Wnt1 up vs E15.5 * Ctrl |
| 10354506 | Mfsd6         | NM_133829     | 5.05769e-009 | 4.26256 | E15.5 * Wnt1 up vs E15.5 * Ctrl |
| 10457942 | Syt4          | NM_009308     | 7.14247e-010 | 4.25743 | E15.5 * Wnt1 up vs E15.5 * Ctrl |
| 10458767 | Trim36        | NM_178872     | 1.16027e-010 | 4.25637 | E15.5 * Wnt1 up vs E15.5 * Ctrl |
| 10537300 | 1700111E14Rik | ENSMUST000001 | 1.93981e-007 | 4.25336 | E15.5 * Wnt1 up vs E15.5 * Ctrl |
| 10368997 | C130030K03Rik | AK048022      | 7.13157e-006 | 4.24639 | E15.5 * Wnt1 up vs E15.5 * Ctrl |
| 10407481 | Pfkp          | NM_019703     | 4.60561e-011 | 4.23916 | E15.5 * Wnt1 up vs E15.5 * Ctrl |
| 10593671 | Dmxl2         | NM_172771     | 7.56352e-013 | 4.23113 | E15.5 * Wnt1 up vs E15.5 * Ctrl |
| 10548043 | Kcna5         | NM_145983     | 3.24676e-008 | 4.22604 | E15.5 * Wnt1 up vs E15.5 * Ctrl |
| 10503222 | Chd7          | NM_001081417  | 3.15811e-011 | 4.21941 | E15.5 * Wnt1 up vs E15.5 * Ctrl |
| 10529953 | ENSMUSG0000C  | AK036806      | 5.62548e-006 | 4.2098  | E15.5 * Wnt1 up vs E15.5 * Ctrl |
| 10400126 | Lrrn3         | NM_010733     | 2.24275e-013 | 4.20074 | E15.5 * Wnt1 up vs E15.5 * Ctrl |
| 10345241 | Dst           | NM_134448     | 3.79717e-015 | 4.17122 | E15.5 * Wnt1 up vs E15.5 * Ctrl |
| 10361642 | Lrp11         | NM_172784     | 3.47597e-009 | 4.1685  | E15.5 * Wnt1 up vs E15.5 * Ctrl |
| 10560919 | Atp1a3        | NM_144921     | 2.60357e-008 | 4.15567 | E15.5 * Wnt1 up vs E15.5 * Ctrl |
| 10400607 | Mdga2         | AK163637      | 1.29235e-008 | 4.15418 | E15.5 * Wnt1 up vs E15.5 * Ctrl |
| 10573979 | Gnao1         | NM_010308     | 1.51071e-012 | 4.1529  | E15.5 * Wnt1 up vs E15.5 * Ctrl |

|          |                        |               |              |         |                                 |
|----------|------------------------|---------------|--------------|---------|---------------------------------|
| 10435733 | Igsf11                 | NM_170599     | 8.44344e-011 | 4.14948 | E15.5 * Wnt1 up vs E15.5 * Ctrl |
| 10590663 | Gria4                  | NM_019691     | 4.23395e-012 | 4.14535 | E15.5 * Wnt1 up vs E15.5 * Ctrl |
| 10563937 | Snord115               | AF357427      | 1.51043e-008 | 4.14348 | E15.5 * Wnt1 up vs E15.5 * Ctrl |
| 10563947 | Snord115               | AF357427      | 1.51043e-008 | 4.14348 | E15.5 * Wnt1 up vs E15.5 * Ctrl |
| 10563951 | Snord115               | AF357427      | 1.51043e-008 | 4.14348 | E15.5 * Wnt1 up vs E15.5 * Ctrl |
| 10563953 | Snord115               | AF357427      | 1.51043e-008 | 4.14348 | E15.5 * Wnt1 up vs E15.5 * Ctrl |
| 10563957 | Snord115               | AF357427      | 1.51043e-008 | 4.14348 | E15.5 * Wnt1 up vs E15.5 * Ctrl |
| 10563995 | Snord115               | AF357427      | 1.51043e-008 | 4.14348 | E15.5 * Wnt1 up vs E15.5 * Ctrl |
| 10563997 | Snord115               | AF357427      | 1.51043e-008 | 4.14348 | E15.5 * Wnt1 up vs E15.5 * Ctrl |
| 10563999 | Snord115               | AF357427      | 1.51043e-008 | 4.14348 | E15.5 * Wnt1 up vs E15.5 * Ctrl |
| 10564001 | Snord115               | AF357427      | 1.51043e-008 | 4.14348 | E15.5 * Wnt1 up vs E15.5 * Ctrl |
| 10564003 | Snord115               | AF357427      | 1.51043e-008 | 4.14348 | E15.5 * Wnt1 up vs E15.5 * Ctrl |
| 10564007 | Snord115               | AF357427      | 1.51043e-008 | 4.14348 | E15.5 * Wnt1 up vs E15.5 * Ctrl |
| 10564029 | Snord115               | AF357427      | 1.51043e-008 | 4.14348 | E15.5 * Wnt1 up vs E15.5 * Ctrl |
| 10564031 | Snord115               | AF357427      | 1.51043e-008 | 4.14348 | E15.5 * Wnt1 up vs E15.5 * Ctrl |
| 10564035 | ---                    | ---           | 1.51043e-008 | 4.14348 | E15.5 * Wnt1 up vs E15.5 * Ctrl |
| 10564039 | ---                    | ---           | 1.51043e-008 | 4.14348 | E15.5 * Wnt1 up vs E15.5 * Ctrl |
| 10564051 | ---                    | ---           | 1.51043e-008 | 4.14348 | E15.5 * Wnt1 up vs E15.5 * Ctrl |
| 10564059 | ---                    | ---           | 1.51043e-008 | 4.14348 | E15.5 * Wnt1 up vs E15.5 * Ctrl |
| 10564061 | ---                    | ---           | 1.51043e-008 | 4.14348 | E15.5 * Wnt1 up vs E15.5 * Ctrl |
| 10564063 | ---                    | ---           | 1.51043e-008 | 4.14348 | E15.5 * Wnt1 up vs E15.5 * Ctrl |
| 10564065 | 100040985 XM_001475615 | ---           | 1.51043e-008 | 4.14348 | E15.5 * Wnt1 up vs E15.5 * Ctrl |
| 10564067 | ---                    | ---           | 1.51043e-008 | 4.14348 | E15.5 * Wnt1 up vs E15.5 * Ctrl |
| 10564071 | ---                    | ---           | 1.51043e-008 | 4.14348 | E15.5 * Wnt1 up vs E15.5 * Ctrl |
| 10564075 | ---                    | ---           | 1.51043e-008 | 4.14348 | E15.5 * Wnt1 up vs E15.5 * Ctrl |
| 10564081 | ---                    | ---           | 1.51043e-008 | 4.14348 | E15.5 * Wnt1 up vs E15.5 * Ctrl |
| 10564083 | ---                    | ---           | 1.51043e-008 | 4.14348 | E15.5 * Wnt1 up vs E15.5 * Ctrl |
| 10564131 | ---                    | ---           | 1.51043e-008 | 4.14348 | E15.5 * Wnt1 up vs E15.5 * Ctrl |
| 10564133 | ---                    | ---           | 1.51043e-008 | 4.14348 | E15.5 * Wnt1 up vs E15.5 * Ctrl |
| 10564141 | ---                    | ---           | 1.51043e-008 | 4.14348 | E15.5 * Wnt1 up vs E15.5 * Ctrl |
| 10564145 | ---                    | ---           | 1.51043e-008 | 4.14348 | E15.5 * Wnt1 up vs E15.5 * Ctrl |
| 10564149 | ---                    | ---           | 1.51043e-008 | 4.14348 | E15.5 * Wnt1 up vs E15.5 * Ctrl |
| 10564151 | ---                    | ---           | 1.51043e-008 | 4.14348 | E15.5 * Wnt1 up vs E15.5 * Ctrl |
| 10564153 | ---                    | ---           | 1.51043e-008 | 4.14348 | E15.5 * Wnt1 up vs E15.5 * Ctrl |
| 10564155 | ---                    | ---           | 1.51043e-008 | 4.14348 | E15.5 * Wnt1 up vs E15.5 * Ctrl |
| 10367982 | Gpr126                 | NM_001002268  | 5.53718e-011 | 4.1413  | E15.5 * Wnt1 up vs E15.5 * Ctrl |
| 10503202 | Chd7                   | NM_001081417  | 4.34473e-011 | 4.13928 | E15.5 * Wnt1 up vs E15.5 * Ctrl |
| 10428407 | Tmem74                 | NM_175502     | 2.07433e-010 | 4.10226 | E15.5 * Wnt1 up vs E15.5 * Ctrl |
| 10441195 | Dscam                  | NM_031174     | 2.3627e-010  | 4.09826 | E15.5 * Wnt1 up vs E15.5 * Ctrl |
| 10433428 | ---                    | ---           | 3.86365e-006 | 4.09235 | E15.5 * Wnt1 up vs E15.5 * Ctrl |
| 10564041 | ---                    | ---           | 7.29296e-009 | 4.08502 | E15.5 * Wnt1 up vs E15.5 * Ctrl |
| 10571567 | Sorbs2                 | NM_172752     | 1.93686e-013 | 4.08193 | E15.5 * Wnt1 up vs E15.5 * Ctrl |
| 10360920 | Tgfb2                  | NM_009367     | 4.05072e-018 | 4.07046 | E15.5 * Wnt1 up vs E15.5 * Ctrl |
| 10381776 | Mapt                   | NM_001038609  | 1.70065e-010 | 4.06901 | E15.5 * Wnt1 up vs E15.5 * Ctrl |
| 10556067 | Syt9                   | NM_021889     | 1.91178e-011 | 4.06341 | E15.5 * Wnt1 up vs E15.5 * Ctrl |
| 10599880 | Slitrk2                | NM_198863     | 1.76939e-010 | 4.05889 | E15.5 * Wnt1 up vs E15.5 * Ctrl |
| 10503166 | Chd7                   | NM_001081417  | 2.87404e-008 | 4.04695 | E15.5 * Wnt1 up vs E15.5 * Ctrl |
| 10598996 | EG331392               | NM_198633     | 2.66867e-010 | 4.04493 | E15.5 * Wnt1 up vs E15.5 * Ctrl |
| 10518812 | Camta1                 | NM_001081557  | 5.11344e-011 | 4.03519 | E15.5 * Wnt1 up vs E15.5 * Ctrl |
| 10366144 | Mgat4c                 | NM_026243     | 1.23248e-009 | 4.03286 | E15.5 * Wnt1 up vs E15.5 * Ctrl |
| 10539310 | Pcgef1                 | NM_197992     | 3.68285e-009 | 4.02485 | E15.5 * Wnt1 up vs E15.5 * Ctrl |
| 10503214 | Chd7                   | NM_001081417  | 4.17707e-010 | 4.02368 | E15.5 * Wnt1 up vs E15.5 * Ctrl |
| 10399892 | Gpr22                  | NM_175191     | 4.8141e-011  | 4.02277 | E15.5 * Wnt1 up vs E15.5 * Ctrl |
| 10503218 | Chd7                   | NM_001081417  | 6.04692e-007 | 4.02067 | E15.5 * Wnt1 up vs E15.5 * Ctrl |
| 10521602 | Cpeb2                  | NM_175937     | 5.48077e-009 | 4.02011 | E15.5 * Wnt1 up vs E15.5 * Ctrl |
| 10435752 | Lsomp                  | NM_175548     | 1.49842e-012 | 4.01126 | E15.5 * Wnt1 up vs E15.5 * Ctrl |
| 10514561 | E130114P18Rik          | ENSMUST000001 | 6.57417e-010 | 3.98604 | E15.5 * Wnt1 up vs E15.5 * Ctrl |
| 10506274 | Dnajc6                 | NM_198412     | 1.22449e-012 | 3.97205 | E15.5 * Wnt1 up vs E15.5 * Ctrl |
| 10472384 | Scn2a1                 | NM_001099298  | 1.44259e-007 | 3.971   | E15.5 * Wnt1 up vs E15.5 * Ctrl |
| 10596583 | Dock3                  | NM_153413     | 2.18273e-011 | 3.97082 | E15.5 * Wnt1 up vs E15.5 * Ctrl |
| 10452295 | Tubb4                  | NM_009451     | 3.73336e-009 | 3.95454 | E15.5 * Wnt1 up vs E15.5 * Ctrl |
| 10353632 | Bai3                   | NM_175642     | 1.92891e-011 | 3.95248 | E15.5 * Wnt1 up vs E15.5 * Ctrl |
| 10415784 | Trim13                 | NM_023233     | 1.39359e-007 | 3.94829 | E15.5 * Wnt1 up vs E15.5 * Ctrl |
| 10606554 | Nap1l3                 | NM_138742     | 3.07718e-010 | 3.91663 | E15.5 * Wnt1 up vs E15.5 * Ctrl |
| 10605431 | Rab39b                 | NM_175122     | 1.67832e-009 | 3.90083 | E15.5 * Wnt1 up vs E15.5 * Ctrl |
| 10399419 | Tubb2b                 | NM_023716     | 1.4546e-010  | 3.88953 | E15.5 * Wnt1 up vs E15.5 * Ctrl |

|          |            |              |              |         |                                 |
|----------|------------|--------------|--------------|---------|---------------------------------|
| 10350896 | Astn1      | NM_007495    | 7.20233e-011 | 3.86931 | E15.5 * Wnt1 up vs E15.5 * Ctrl |
| 10405343 | Tspan17    | NM_028841    | 6.3931e-011  | 3.85873 | E15.5 * Wnt1 up vs E15.5 * Ctrl |
| 10601903 | Zcchc18    | NM_001035510 | 4.39125e-009 | 3.84899 | E15.5 * Wnt1 up vs E15.5 * Ctrl |
| 10425726 | 03-Sep     | NM_011889    | 2.52201e-013 | 3.83878 | E15.5 * Wnt1 up vs E15.5 * Ctrl |
| 10513061 | Ctnnal1    | NM_018761    | 1.30821e-012 | 3.83389 | E15.5 * Wnt1 up vs E15.5 * Ctrl |
| 10593668 | Dmxl2      | NM_172771    | 1.59331e-009 | 3.82735 | E15.5 * Wnt1 up vs E15.5 * Ctrl |
| 10589800 | Clasp2     | NM_001114347 | 1.80575e-015 | 3.82085 | E15.5 * Wnt1 up vs E15.5 * Ctrl |
| 10503174 | Chd7       | NM_001081417 | 4.51658e-011 | 3.81452 | E15.5 * Wnt1 up vs E15.5 * Ctrl |
| 10587241 | Hmgcll1    | NM_173731    | 4.82303e-009 | 3.8059  | E15.5 * Wnt1 up vs E15.5 * Ctrl |
| 10573172 | Clgn       | NM_009904    | 2.71134e-010 | 3.78857 | E15.5 * Wnt1 up vs E15.5 * Ctrl |
| 10602692 | Rragb      | NM_001004154 | 2.56588e-009 | 3.78692 | E15.5 * Wnt1 up vs E15.5 * Ctrl |
| 10472380 | Scn2a1     | NM_001099298 | 1.21472e-006 | 3.78321 | E15.5 * Wnt1 up vs E15.5 * Ctrl |
| 10345212 | Khdrbs2    | NM_133235    | 2.4032e-009  | 3.78248 | E15.5 * Wnt1 up vs E15.5 * Ctrl |
| 10366196 | Ppfia2     | NM_177373    | 2.1734e-011  | 3.78088 | E15.5 * Wnt1 up vs E15.5 * Ctrl |
| 10495625 | Dpyd       | NM_170778    | 6.65595e-010 | 3.78045 | E15.5 * Wnt1 up vs E15.5 * Ctrl |
| 10544875 | Scrn1      | NM_027268    | 2.88413e-008 | 3.7722  | E15.5 * Wnt1 up vs E15.5 * Ctrl |
| 10443108 | Syngap1    | XM_985548    | 3.60064e-005 | 3.76427 | E15.5 * Wnt1 up vs E15.5 * Ctrl |
| 10388465 | Doc2b      | NM_007873    | 6.55713e-011 | 3.76245 | E15.5 * Wnt1 up vs E15.5 * Ctrl |
| 10501971 | Ank2       | NM_178655    | 2.75809e-012 | 3.73371 | E15.5 * Wnt1 up vs E15.5 * Ctrl |
| 10541260 | Cecr2      | NM_001128151 | 2.10663e-009 | 3.73014 | E15.5 * Wnt1 up vs E15.5 * Ctrl |
| 10472378 | Scn2a1     | NM_001099298 | 3.07978e-005 | 3.72878 | E15.5 * Wnt1 up vs E15.5 * Ctrl |
| 10481772 | Garnl3     | NM_178888    | 1.96149e-011 | 3.72614 | E15.5 * Wnt1 up vs E15.5 * Ctrl |
| 10542896 | Bicd1      | NM_009753    | 1.22209e-010 | 3.72612 | E15.5 * Wnt1 up vs E15.5 * Ctrl |
| 10542414 | Ptpro      | NM_011216    | 6.55283e-010 | 3.71909 | E15.5 * Wnt1 up vs E15.5 * Ctrl |
| 10540401 | Lrrn1      | NM_008516    | 3.19004e-013 | 3.71317 | E15.5 * Wnt1 up vs E15.5 * Ctrl |
| 10526564 | Ufsp1      | NM_027356    | 2.98263e-009 | 3.71308 | E15.5 * Wnt1 up vs E15.5 * Ctrl |
| 10602198 | Pak3       | NM_008778    | 4.75211e-010 | 3.69564 | E15.5 * Wnt1 up vs E15.5 * Ctrl |
| 10371578 | Ascl1      | NM_008553    | 1.51851e-006 | 3.69196 | E15.5 * Wnt1 up vs E15.5 * Ctrl |
| 10557177 | Prkcb      | NM_008855    | 1.97736e-009 | 3.68924 | E15.5 * Wnt1 up vs E15.5 * Ctrl |
| 10457606 | Kctd1      | NM_134112    | 6.81182e-010 | 3.68346 | E15.5 * Wnt1 up vs E15.5 * Ctrl |
| 10503188 | Chd7       | NM_001081417 | 4.74302e-009 | 3.68313 | E15.5 * Wnt1 up vs E15.5 * Ctrl |
| 10568982 | BC066028   | NM_001001180 | 1.64258e-009 | 3.67997 | E15.5 * Wnt1 up vs E15.5 * Ctrl |
| 10579550 | Unc13a     | BC058348     | 2.57825e-010 | 3.66491 | E15.5 * Wnt1 up vs E15.5 * Ctrl |
| 10397482 | Tmem63c    | NM_172583    | 6.89855e-011 | 3.66266 | E15.5 * Wnt1 up vs E15.5 * Ctrl |
| 10503212 | Chd7       | NM_001081417 | 4.09093e-008 | 3.66206 | E15.5 * Wnt1 up vs E15.5 * Ctrl |
| 10365682 | Anks1b     | NM_001128086 | 2.5971e-009  | 3.65642 | E15.5 * Wnt1 up vs E15.5 * Ctrl |
| 10503208 | Chd7       | NM_001081417 | 1.99162e-009 | 3.65133 | E15.5 * Wnt1 up vs E15.5 * Ctrl |
| 10502881 | St6galnac5 | NM_012028    | 2.70737e-011 | 3.63701 | E15.5 * Wnt1 up vs E15.5 * Ctrl |
| 10492720 | Mtap9      | NM_001081230 | 2.63716e-008 | 3.63008 | E15.5 * Wnt1 up vs E15.5 * Ctrl |
| 10440216 | Epha6      | NM_007938    | 1.6107e-009  | 3.61169 | E15.5 * Wnt1 up vs E15.5 * Ctrl |
| 10528090 | Rundc3b    | NM_198620    | 1.50516e-009 | 3.58822 | E15.5 * Wnt1 up vs E15.5 * Ctrl |
| 10497051 | Negr1      | NM_001039094 | 7.36728e-009 | 3.57032 | E15.5 * Wnt1 up vs E15.5 * Ctrl |
| 10422164 | Ednrb      | NM_007904    | 1.38082e-012 | 3.56395 | E15.5 * Wnt1 up vs E15.5 * Ctrl |
| 10503206 | Chd7       | NM_001081417 | 1.35595e-009 | 3.54672 | E15.5 * Wnt1 up vs E15.5 * Ctrl |
| 10549594 | Ttyh1      | NM_021324    | 5.07947e-012 | 3.5416  | E15.5 * Wnt1 up vs E15.5 * Ctrl |
| 10357736 | Nfasc      | NM_182716    | 6.43806e-009 | 3.54116 | E15.5 * Wnt1 up vs E15.5 * Ctrl |
| 10458645 | Ppp2r2b    | NM_028392    | 2.45754e-012 | 3.52898 | E15.5 * Wnt1 up vs E15.5 * Ctrl |
| 10472984 | Hoxd3      | NM_010468    | 1.88054e-010 | 3.52798 | E15.5 * Wnt1 up vs E15.5 * Ctrl |
| 10546853 | Srgap3     | NM_080448    | 8.85101e-012 | 3.52049 | E15.5 * Wnt1 up vs E15.5 * Ctrl |
| 10503178 | Chd7       | NM_001081417 | 1.35723e-011 | 3.51422 | E15.5 * Wnt1 up vs E15.5 * Ctrl |
| 10563993 | ---        | ---          | 1.32721e-009 | 3.51327 | E15.5 * Wnt1 up vs E15.5 * Ctrl |
| 10564021 | ---        | ---          | 1.32721e-009 | 3.51327 | E15.5 * Wnt1 up vs E15.5 * Ctrl |
| 10564025 | ---        | ---          | 1.32721e-009 | 3.51327 | E15.5 * Wnt1 up vs E15.5 * Ctrl |
| 10403796 | Amph       | NM_175007    | 3.03086e-009 | 3.50872 | E15.5 * Wnt1 up vs E15.5 * Ctrl |
| 10428698 | Sntb1      | NM_016667    | 1.2626e-010  | 3.4963  | E15.5 * Wnt1 up vs E15.5 * Ctrl |
| 10406823 | ---        | ---          | 7.87327e-008 | 3.47952 | E15.5 * Wnt1 up vs E15.5 * Ctrl |
| 10529656 | Nsg1       | NM_010942    | 5.32997e-012 | 3.47637 | E15.5 * Wnt1 up vs E15.5 * Ctrl |
| 10472136 | Galnt13    | NM_173030    | 1.88165e-009 | 3.45516 | E15.5 * Wnt1 up vs E15.5 * Ctrl |
| 10423951 | ---        | ---          | 1.48066e-007 | 3.45497 | E15.5 * Wnt1 up vs E15.5 * Ctrl |
| 10503170 | Chd7       | NM_001081417 | 1.15809e-012 | 3.4528  | E15.5 * Wnt1 up vs E15.5 * Ctrl |
| 10372338 | EG368203   | NM_203660    | 2.2982e-006  | 3.4467  | E15.5 * Wnt1 up vs E15.5 * Ctrl |
| 10435767 | ---        | ---          | 0.000365451  | 3.43159 | E15.5 * Wnt1 up vs E15.5 * Ctrl |
| 10580247 | Mast1      | NM_019945    | 2.9395e-010  | 3.42986 | E15.5 * Wnt1 up vs E15.5 * Ctrl |
| 10598359 | Syp        | NM_009305    | 1.04429e-010 | 3.42281 | E15.5 * Wnt1 up vs E15.5 * Ctrl |
| 10439651 | Cd200      | NM_010818    | 2.51988e-009 | 3.41987 | E15.5 * Wnt1 up vs E15.5 * Ctrl |
| 10456363 | Gnal       | NM_010307    | 2.07723e-007 | 3.41251 | E15.5 * Wnt1 up vs E15.5 * Ctrl |

|          |              |              |              |         |                                 |
|----------|--------------|--------------|--------------|---------|---------------------------------|
| 10360349 | Cadm3        | NM_053199    | 3.63167e-010 | 3.4054  | E15.5 * Wnt1 up vs E15.5 * Ctrl |
| 10483719 | Chn1         | NM_001113246 | 3.88902e-012 | 3.39433 | E15.5 * Wnt1 up vs E15.5 * Ctrl |
| 10435745 | ENSMUSG0000C | AY512926     | 0.000168856  | 3.38181 | E15.5 * Wnt1 up vs E15.5 * Ctrl |
| 10564013 | Snord115     | AF357427     | 1.53352e-009 | 3.38141 | E15.5 * Wnt1 up vs E15.5 * Ctrl |
| 10564017 | Snord115     | AF357427     | 1.53352e-009 | 3.38141 | E15.5 * Wnt1 up vs E15.5 * Ctrl |
| 10553917 | Apba2        | NM_007461    | 1.98316e-008 | 3.37804 | E15.5 * Wnt1 up vs E15.5 * Ctrl |
| 10431017 | Tll1         | NM_178869    | 6.63102e-012 | 3.36944 | E15.5 * Wnt1 up vs E15.5 * Ctrl |
| 10545041 | Nap1l5       | NM_021432    | 3.60487e-009 | 3.35303 | E15.5 * Wnt1 up vs E15.5 * Ctrl |
| 10490794 | Pkia         | NM_008862    | 2.29754e-009 | 3.35057 | E15.5 * Wnt1 up vs E15.5 * Ctrl |
| 10564089 | ---          | ---          | 6.12469e-008 | 3.33673 | E15.5 * Wnt1 up vs E15.5 * Ctrl |
| 10354777 | Satb2        | NM_139146    | 3.08869e-008 | 3.33347 | E15.5 * Wnt1 up vs E15.5 * Ctrl |
| 10407072 | Elovl7       | NM_029001    | 4.43134e-007 | 3.33207 | E15.5 * Wnt1 up vs E15.5 * Ctrl |
| 10564143 | ---          | ---          | 1.55159e-010 | 3.33156 | E15.5 * Wnt1 up vs E15.5 * Ctrl |
| 10564147 | ---          | ---          | 1.55159e-010 | 3.33156 | E15.5 * Wnt1 up vs E15.5 * Ctrl |
| 10346882 | Adam23       | NM_011780    | 1.71763e-009 | 3.32863 | E15.5 * Wnt1 up vs E15.5 * Ctrl |
| 10538482 | Adcyap1r1    | NM_007407    | 4.72517e-009 | 3.32272 | E15.5 * Wnt1 up vs E15.5 * Ctrl |
| 10535577 | Tmem130      | NM_177735    | 2.14329e-010 | 3.32246 | E15.5 * Wnt1 up vs E15.5 * Ctrl |
| 10351056 | Ankrd45      | BC049713     | 8.58572e-008 | 3.31999 | E15.5 * Wnt1 up vs E15.5 * Ctrl |
| 10514520 | Cyp2j9       | NM_028979    | 4.53553e-009 | 3.31913 | E15.5 * Wnt1 up vs E15.5 * Ctrl |
| 10546855 | Srgap3       | NM_080448    | 2.20591e-013 | 3.3191  | E15.5 * Wnt1 up vs E15.5 * Ctrl |
| 10420846 | Fzd3         | NM_021458    | 3.31046e-012 | 3.3168  | E15.5 * Wnt1 up vs E15.5 * Ctrl |
| 10492536 | ---          | ---          | 2.45932e-007 | 3.31319 | E15.5 * Wnt1 up vs E15.5 * Ctrl |
| 10470529 | Olfm1        | NM_019498    | 2.00999e-012 | 3.3082  | E15.5 * Wnt1 up vs E15.5 * Ctrl |
| 10564135 | ---          | ---          | 1.03752e-010 | 3.30592 | E15.5 * Wnt1 up vs E15.5 * Ctrl |
| 10499138 | Dclk2        | NM_027539    | 1.54398e-011 | 3.30066 | E15.5 * Wnt1 up vs E15.5 * Ctrl |
| 10564023 | ---          | ---          | 4.26188e-007 | 3.29648 | E15.5 * Wnt1 up vs E15.5 * Ctrl |
| 10462113 | Apba1        | NM_177034    | 1.03948e-009 | 3.29339 | E15.5 * Wnt1 up vs E15.5 * Ctrl |
| 10563935 | ---          | ---          | 1.20063e-008 | 3.28814 | E15.5 * Wnt1 up vs E15.5 * Ctrl |
| 10564045 | ---          | ---          | 1.20063e-008 | 3.28814 | E15.5 * Wnt1 up vs E15.5 * Ctrl |
| 10564047 | ---          | ---          | 1.20063e-008 | 3.28814 | E15.5 * Wnt1 up vs E15.5 * Ctrl |
| 10381574 | Rundc3a      | NM_016759    | 2.56058e-010 | 3.28412 | E15.5 * Wnt1 up vs E15.5 * Ctrl |
| 10503168 | Chd7         | NM_001081417 | 1.81662e-010 | 3.27593 | E15.5 * Wnt1 up vs E15.5 * Ctrl |
| 10514510 | Cyp2j6       | NM_010008    | 1.04028e-009 | 3.27524 | E15.5 * Wnt1 up vs E15.5 * Ctrl |
| 10564033 | ---          | ---          | 3.47507e-007 | 3.26615 | E15.5 * Wnt1 up vs E15.5 * Ctrl |
| 10451039 | Slc25a27     | NM_028711    | 6.46862e-011 | 3.2625  | E15.5 * Wnt1 up vs E15.5 * Ctrl |
| 10564027 | ---          | ---          | 1.34338e-007 | 3.25281 | E15.5 * Wnt1 up vs E15.5 * Ctrl |
| 10564077 | ---          | ---          | 1.34338e-007 | 3.25281 | E15.5 * Wnt1 up vs E15.5 * Ctrl |
| 10564079 | ---          | ---          | 1.34338e-007 | 3.25281 | E15.5 * Wnt1 up vs E15.5 * Ctrl |
| 10564085 | ---          | ---          | 1.34338e-007 | 3.25281 | E15.5 * Wnt1 up vs E15.5 * Ctrl |
| 10564087 | ---          | ---          | 1.34338e-007 | 3.25281 | E15.5 * Wnt1 up vs E15.5 * Ctrl |
| 10564091 | ---          | ---          | 1.34338e-007 | 3.25281 | E15.5 * Wnt1 up vs E15.5 * Ctrl |
| 10564093 | ---          | ---          | 1.34338e-007 | 3.25281 | E15.5 * Wnt1 up vs E15.5 * Ctrl |
| 10564095 | ---          | ---          | 1.34338e-007 | 3.25281 | E15.5 * Wnt1 up vs E15.5 * Ctrl |
| 10564097 | ---          | ---          | 1.34338e-007 | 3.25281 | E15.5 * Wnt1 up vs E15.5 * Ctrl |
| 10564099 | ---          | ---          | 1.34338e-007 | 3.25281 | E15.5 * Wnt1 up vs E15.5 * Ctrl |
| 10564101 | ---          | ---          | 1.34338e-007 | 3.25281 | E15.5 * Wnt1 up vs E15.5 * Ctrl |
| 10564103 | ---          | ---          | 1.34338e-007 | 3.25281 | E15.5 * Wnt1 up vs E15.5 * Ctrl |
| 10564105 | ---          | ---          | 1.34338e-007 | 3.25281 | E15.5 * Wnt1 up vs E15.5 * Ctrl |
| 10564107 | ---          | ---          | 1.34338e-007 | 3.25281 | E15.5 * Wnt1 up vs E15.5 * Ctrl |
| 10564113 | ---          | ---          | 1.34338e-007 | 3.25281 | E15.5 * Wnt1 up vs E15.5 * Ctrl |
| 10564115 | ---          | ---          | 1.34338e-007 | 3.25281 | E15.5 * Wnt1 up vs E15.5 * Ctrl |
| 10564119 | ---          | ---          | 1.34338e-007 | 3.25281 | E15.5 * Wnt1 up vs E15.5 * Ctrl |
| 10564121 | ---          | ---          | 1.34338e-007 | 3.25281 | E15.5 * Wnt1 up vs E15.5 * Ctrl |
| 10564123 | ---          | ---          | 1.34338e-007 | 3.25281 | E15.5 * Wnt1 up vs E15.5 * Ctrl |
| 10564125 | ---          | ---          | 1.34338e-007 | 3.25281 | E15.5 * Wnt1 up vs E15.5 * Ctrl |
| 10564127 | ---          | ---          | 1.34338e-007 | 3.25281 | E15.5 * Wnt1 up vs E15.5 * Ctrl |
| 10564129 | ---          | ---          | 1.34338e-007 | 3.25281 | E15.5 * Wnt1 up vs E15.5 * Ctrl |
| 10564139 | ---          | ---          | 1.34338e-007 | 3.25281 | E15.5 * Wnt1 up vs E15.5 * Ctrl |
| 10354141 | Lonrf2       | NM_001029878 | 1.18272e-007 | 3.24383 | E15.5 * Wnt1 up vs E15.5 * Ctrl |
| 10524909 | Nos1         | NM_008712    | 1.80969e-010 | 3.21656 | E15.5 * Wnt1 up vs E15.5 * Ctrl |
| 10523758 | Lrrc8b       | NM_001033550 | 1.25155e-009 | 3.21386 | E15.5 * Wnt1 up vs E15.5 * Ctrl |
| 10455259 | Arhgap26     | NM_175164    | 1.17816e-010 | 3.20255 | E15.5 * Wnt1 up vs E15.5 * Ctrl |
| 10431625 | Syt10        | NM_018803    | 2.08171e-008 | 3.20059 | E15.5 * Wnt1 up vs E15.5 * Ctrl |
| 10468722 | Gfra1        | NM_010279    | 3.95257e-010 | 3.19713 | E15.5 * Wnt1 up vs E15.5 * Ctrl |
| 10532630 | Adrbk2       | NM_177078    | 1.08277e-007 | 3.19703 | E15.5 * Wnt1 up vs E15.5 * Ctrl |
| 10543967 | Dgki         | NM_001081206 | 5.53752e-007 | 3.19132 | E15.5 * Wnt1 up vs E15.5 * Ctrl |

|          |               |              |              |         |                                 |
|----------|---------------|--------------|--------------|---------|---------------------------------|
| 10368175 | Pde7b         | NM_013875    | 8.32382e-009 | 3.18855 | E15.5 * Wnt1 up vs E15.5 * Ctrl |
| 10428513 | Csmd3         | NM_001081391 | 5.80005e-007 | 3.17004 | E15.5 * Wnt1 up vs E15.5 * Ctrl |
| 10508614 | Fabp3         | NM_010174    | 1.99738e-009 | 3.16242 | E15.5 * Wnt1 up vs E15.5 * Ctrl |
| 10438639 | Dgkg          | NM_138650    | 3.00187e-010 | 3.15518 | E15.5 * Wnt1 up vs E15.5 * Ctrl |
| 10593196 | ENSMUSG00000  | ENSMUST00000 | 8.37964e-011 | 3.15061 | E15.5 * Wnt1 up vs E15.5 * Ctrl |
| 10428453 | Csmd3         | NM_001081391 | 5.3979e-012  | 3.1477  | E15.5 * Wnt1 up vs E15.5 * Ctrl |
| 10495343 | Wdr47         | NM_181400    | 2.2728e-008  | 3.14701 | E15.5 * Wnt1 up vs E15.5 * Ctrl |
| 10553537 | Luzp2         | NM_178705    | 3.87832e-007 | 3.13961 | E15.5 * Wnt1 up vs E15.5 * Ctrl |
| 10533633 | Diablo        | NM_023232    | 1.07416e-012 | 3.13407 | E15.5 * Wnt1 up vs E15.5 * Ctrl |
| 10557535 | Sez6l2        | NM_144926    | 1.07152e-009 | 3.13317 | E15.5 * Wnt1 up vs E15.5 * Ctrl |
| 10457929 | Rit2          | NM_009065    | 6.92159e-009 | 3.13094 | E15.5 * Wnt1 up vs E15.5 * Ctrl |
| 10469573 | ---           | ---          | 1.26864e-005 | 3.12381 | E15.5 * Wnt1 up vs E15.5 * Ctrl |
| 10600180 | Atp2b3        | NM_177236    | 1.43848e-009 | 3.12059 | E15.5 * Wnt1 up vs E15.5 * Ctrl |
| 10473312 | Fam171b       | NM_175514    | 8.87352e-009 | 3.11448 | E15.5 * Wnt1 up vs E15.5 * Ctrl |
| 10593233 | Htr3a         | NM_013561    | 1.77851e-007 | 3.11238 | E15.5 * Wnt1 up vs E15.5 * Ctrl |
| 10452766 | ---           | ---          | 0.00251697   | 3.10761 | E15.5 * Wnt1 up vs E15.5 * Ctrl |
| 10600114 | Pnma3         | NM_153169    | 4.66469e-009 | 3.1056  | E15.5 * Wnt1 up vs E15.5 * Ctrl |
| 10408838 | Elovl2        | NM_019423    | 1.07414e-008 | 3.1043  | E15.5 * Wnt1 up vs E15.5 * Ctrl |
| 10503210 | Chd7          | NM_001081417 | 8.13092e-009 | 3.09257 | E15.5 * Wnt1 up vs E15.5 * Ctrl |
| 10504692 | Tmod1         | NM_021883    | 4.5769e-009  | 3.07836 | E15.5 * Wnt1 up vs E15.5 * Ctrl |
| 10472364 | Scn2a1        | NM_001099298 | 1.34816e-005 | 3.07516 | E15.5 * Wnt1 up vs E15.5 * Ctrl |
| 10537458 | EG434008      | NM_001004182 | 1.99081e-007 | 3.07372 | E15.5 * Wnt1 up vs E15.5 * Ctrl |
| 10408268 | Scgn          | NM_145399    | 3.89726e-005 | 3.07265 | E15.5 * Wnt1 up vs E15.5 * Ctrl |
| 10589130 | Celsr3        | NM_080437    | 7.47639e-010 | 3.07052 | E15.5 * Wnt1 up vs E15.5 * Ctrl |
| 10349826 | ENSMUSG00000  | ENSMUST00000 | 3.01837e-005 | 3.06937 | E15.5 * Wnt1 up vs E15.5 * Ctrl |
| 10555303 | Pgm2l1        | NM_027629    | 4.33925e-008 | 3.06357 | E15.5 * Wnt1 up vs E15.5 * Ctrl |
| 10391084 | Hap1          | NM_010404    | 1.36845e-009 | 3.06275 | E15.5 * Wnt1 up vs E15.5 * Ctrl |
| 10350697 | Nmnat2        | NM_175460    | 1.17871e-008 | 3.0618  | E15.5 * Wnt1 up vs E15.5 * Ctrl |
| 10457963 | Gpr17         | NM_001025381 | 8.02582e-008 | 3.05607 | E15.5 * Wnt1 up vs E15.5 * Ctrl |
| 10504234 | Unc13b        | NM_001081413 | 1.4161e-011  | 3.05278 | E15.5 * Wnt1 up vs E15.5 * Ctrl |
| 10498965 | Npy2r         | NM_008731    | 1.08097e-005 | 3.04575 | E15.5 * Wnt1 up vs E15.5 * Ctrl |
| 10563965 | ---           | ---          | 6.30972e-010 | 3.04422 | E15.5 * Wnt1 up vs E15.5 * Ctrl |
| 10563967 | ---           | ---          | 6.30972e-010 | 3.04422 | E15.5 * Wnt1 up vs E15.5 * Ctrl |
| 10563971 | ---           | ---          | 6.30972e-010 | 3.04422 | E15.5 * Wnt1 up vs E15.5 * Ctrl |
| 10564043 | ---           | ---          | 6.30972e-010 | 3.04422 | E15.5 * Wnt1 up vs E15.5 * Ctrl |
| 10481711 | Stxbp1        | NM_001113569 | 1.18369e-009 | 3.03899 | E15.5 * Wnt1 up vs E15.5 * Ctrl |
| 10406229 | Pcsk1         | NM_013628    | 5.14777e-009 | 3.03404 | E15.5 * Wnt1 up vs E15.5 * Ctrl |
| 10376998 | A530088H08Rik | EU447173     | 1.33934e-008 | 3.03086 | E15.5 * Wnt1 up vs E15.5 * Ctrl |
| 10564019 | ---           | ---          | 2.31321e-008 | 3.02755 | E15.5 * Wnt1 up vs E15.5 * Ctrl |
| 10406423 | Mblac2        | NM_028372    | 1.27925e-007 | 3.02019 | E15.5 * Wnt1 up vs E15.5 * Ctrl |
| 10433709 | 2900011O08Rik | NM_144518    | 9.13285e-010 | 3.01659 | E15.5 * Wnt1 up vs E15.5 * Ctrl |
| 10551421 | Zfp60         | ENSMUST00000 | 1.69901e-006 | 3.01391 | E15.5 * Wnt1 up vs E15.5 * Ctrl |
| 10526614 | Actl6b        | NM_031404    | 2.15649e-009 | 3.013   | E15.5 * Wnt1 up vs E15.5 * Ctrl |
| 10520304 | Actr3b        | NM_001004365 | 5.48972e-009 | 3.00873 | E15.5 * Wnt1 up vs E15.5 * Ctrl |
| 10496727 | Ddah1         | NM_026993    | 2.68257e-011 | 3.00496 | E15.5 * Wnt1 up vs E15.5 * Ctrl |
| 10547641 | Slc2a3        | NM_011401    | 1.299e-009   | 2.99977 | E15.5 * Wnt1 up vs E15.5 * Ctrl |
| 10358999 | Xpr1          | NM_011273    | 9.46418e-013 | 2.99894 | E15.5 * Wnt1 up vs E15.5 * Ctrl |
| 10564069 | ---           | ---          | 8.80812e-011 | 2.99355 | E15.5 * Wnt1 up vs E15.5 * Ctrl |
| 10564073 | ---           | ---          | 8.80812e-011 | 2.99355 | E15.5 * Wnt1 up vs E15.5 * Ctrl |
| 10454254 | Dtna          | NM_207650    | 2.85572e-011 | 2.98913 | E15.5 * Wnt1 up vs E15.5 * Ctrl |
| 10498707 | Slitrk3       | NM_198864    | 8.45849e-010 | 2.98653 | E15.5 * Wnt1 up vs E15.5 * Ctrl |
| 10371321 | Slc41a2       | NM_177388    | 3.03659e-008 | 2.98566 | E15.5 * Wnt1 up vs E15.5 * Ctrl |
| 10351998 | ENSMUSG00000  | AK142791     | 0.00412116   | 2.98484 | E15.5 * Wnt1 up vs E15.5 * Ctrl |
| 10564005 | ---           | ---          | 4.42595e-006 | 2.97304 | E15.5 * Wnt1 up vs E15.5 * Ctrl |
| 10558481 | Dpysl4        | NM_011993    | 3.04674e-009 | 2.96807 | E15.5 * Wnt1 up vs E15.5 * Ctrl |
| 10356177 | Dner          | NM_152915    | 2.31914e-008 | 2.96181 | E15.5 * Wnt1 up vs E15.5 * Ctrl |
| 10371502 | Fabp3         | NM_010174    | 1.34288e-010 | 2.96154 | E15.5 * Wnt1 up vs E15.5 * Ctrl |
| 10358928 | Cacna1e       | NM_009782    | 7.59893e-010 | 2.95799 | E15.5 * Wnt1 up vs E15.5 * Ctrl |
| 10595392 | Elovl4        | NM_148941    | 5.57311e-007 | 2.95199 | E15.5 * Wnt1 up vs E15.5 * Ctrl |
| 10426397 | Cntn1         | NM_007727    | 4.76461e-009 | 2.94789 | E15.5 * Wnt1 up vs E15.5 * Ctrl |
| 10465943 | Dagla         | NM_198114    | 9.24761e-007 | 2.93444 | E15.5 * Wnt1 up vs E15.5 * Ctrl |
| 10454441 | Syt4          | NM_009308    | 1.93476e-007 | 2.93243 | E15.5 * Wnt1 up vs E15.5 * Ctrl |
| 10576844 | BC068157      | NM_207203    | 1.01781e-009 | 2.93112 | E15.5 * Wnt1 up vs E15.5 * Ctrl |
| 10385391 | Cyflp2        | NM_133769    | 2.56511e-010 | 2.92325 | E15.5 * Wnt1 up vs E15.5 * Ctrl |
| 10505030 | Fsd1l         | NM_176966    | 1.77665e-008 | 2.92203 | E15.5 * Wnt1 up vs E15.5 * Ctrl |
| 10359908 | Rgs4          | NM_009062    | 1.33877e-007 | 2.91818 | E15.5 * Wnt1 up vs E15.5 * Ctrl |

|          |               |               |              |         |                                 |
|----------|---------------|---------------|--------------|---------|---------------------------------|
| 10421526 | Rb1           | NM_009029     | 1.26775e-009 | 2.91449 | E15.5 * Wnt1 up vs E15.5 * Ctrl |
| 10600604 | Dmd           | NM_007868     | 9.38589e-009 | 2.90476 | E15.5 * Wnt1 up vs E15.5 * Ctrl |
| 10348493 | Lrrfip1       | NM_008515     | 2.09289e-012 | 2.90021 | E15.5 * Wnt1 up vs E15.5 * Ctrl |
| 10443383 | Tmhs          | NM_026571     | 1.5179e-007  | 2.89822 | E15.5 * Wnt1 up vs E15.5 * Ctrl |
| 10578810 | Cln3          | NM_173874     | 1.3513e-011  | 2.89796 | E15.5 * Wnt1 up vs E15.5 * Ctrl |
| 10561335 | Prkc2         | NM_008860     | 5.70253e-007 | 2.89729 | E15.5 * Wnt1 up vs E15.5 * Ctrl |
| 10413419 | Arhgef3       | NM_027871     | 2.03434e-009 | 2.88328 | E15.5 * Wnt1 up vs E15.5 * Ctrl |
| 10403604 | Lyst          | NM_010748     | 5.67099e-011 | 2.8827  | E15.5 * Wnt1 up vs E15.5 * Ctrl |
| 10490569 | Kcnq2         | NM_010611     | 5.83163e-011 | 2.87744 | E15.5 * Wnt1 up vs E15.5 * Ctrl |
| 10432362 | Rheb1         | NM_026967     | 1.52086e-007 | 2.87716 | E15.5 * Wnt1 up vs E15.5 * Ctrl |
| 10486875 | Frmd5         | NM_172673     | 1.10917e-009 | 2.86184 | E15.5 * Wnt1 up vs E15.5 * Ctrl |
| 10416340 | Gfra2         | NM_008115     | 1.97838e-009 | 2.86114 | E15.5 * Wnt1 up vs E15.5 * Ctrl |
| 10442887 | Fbxl16        | BC132383      | 8.17344e-008 | 2.85995 | E15.5 * Wnt1 up vs E15.5 * Ctrl |
| 10531304 | Cdkl2         | NM_016912     | 5.8612e-010  | 2.85931 | E15.5 * Wnt1 up vs E15.5 * Ctrl |
| 10433403 | A2bp1         | NM_021477     | 1.68889e-009 | 2.85841 | E15.5 * Wnt1 up vs E15.5 * Ctrl |
| 10357300 | Dpp10         | NM_199021     | 2.35835e-013 | 2.85744 | E15.5 * Wnt1 up vs E15.5 * Ctrl |
| 10379153 | Aldoc         | NM_009657     | 6.348e-009   | 2.85578 | E15.5 * Wnt1 up vs E15.5 * Ctrl |
| 10599530 | Rab33a        | NM_011228     | 7.67855e-008 | 2.85339 | E15.5 * Wnt1 up vs E15.5 * Ctrl |
| 10563955 | 100040985     | XM_001475615  | 2.53073e-006 | 2.84081 | E15.5 * Wnt1 up vs E15.5 * Ctrl |
| 10384233 | Tns3          | NM_001083587  | 9.93242e-010 | 2.84027 | E15.5 * Wnt1 up vs E15.5 * Ctrl |
| 10479230 | Phactr3       | NM_028806     | 2.91071e-008 | 2.83758 | E15.5 * Wnt1 up vs E15.5 * Ctrl |
| 10367775 | Stxbp5        | NM_001081344  | 6.7611e-010  | 2.83221 | E15.5 * Wnt1 up vs E15.5 * Ctrl |
| 10483679 | Gpr155        | NM_001080707  | 2.32806e-009 | 2.82935 | E15.5 * Wnt1 up vs E15.5 * Ctrl |
| 10353117 | Slco5a1       | NM_172841     | 1.00629e-009 | 2.82875 | E15.5 * Wnt1 up vs E15.5 * Ctrl |
| 10393379 | Mxra7         | NM_026280     | 1.20621e-009 | 2.80625 | E15.5 * Wnt1 up vs E15.5 * Ctrl |
| 10539669 | Add2          | NM_013458     | 2.99556e-012 | 2.80497 | E15.5 * Wnt1 up vs E15.5 * Ctrl |
| 10570180 | EG434280      | ENSMUST000001 | 1.04848e-009 | 2.8038  | E15.5 * Wnt1 up vs E15.5 * Ctrl |
| 10491780 | Hspa4l        | NM_011020     | 4.73075e-008 | 2.80299 | E15.5 * Wnt1 up vs E15.5 * Ctrl |
| 10366391 | Kcnc2         | NM_001025581  | 1.33084e-008 | 2.80116 | E15.5 * Wnt1 up vs E15.5 * Ctrl |
| 10580382 | Neto2         | NM_001081324  | 2.5122e-006  | 2.79876 | E15.5 * Wnt1 up vs E15.5 * Ctrl |
| 10353731 | 4930444G20Rik | NM_053264     | 5.39829e-006 | 2.7985  | E15.5 * Wnt1 up vs E15.5 * Ctrl |
| 10488709 | 8430427H17Rik | NM_001134300  | 9.44364e-010 | 2.7931  | E15.5 * Wnt1 up vs E15.5 * Ctrl |
| 10603843 | Syn1          | NM_013680     | 5.21046e-010 | 2.78487 | E15.5 * Wnt1 up vs E15.5 * Ctrl |
| 10587299 | Ick           | NM_019987     | 2.16386e-011 | 2.78425 | E15.5 * Wnt1 up vs E15.5 * Ctrl |
| 10587315 | Gsta4         | NM_010357     | 4.62411e-010 | 2.78327 | E15.5 * Wnt1 up vs E15.5 * Ctrl |
| 10503161 | Chd7          | NM_001081417  | 3.02746e-011 | 2.7808  | E15.5 * Wnt1 up vs E15.5 * Ctrl |
| 10467730 | Morn4         | NM_198108     | 3.16389e-006 | 2.77956 | E15.5 * Wnt1 up vs E15.5 * Ctrl |
| 10505705 | Sh3gl2        | NM_019535     | 4.08243e-010 | 2.77867 | E15.5 * Wnt1 up vs E15.5 * Ctrl |
| 10476633 | Pcsk2         | NM_008792     | 6.80301e-009 | 2.77659 | E15.5 * Wnt1 up vs E15.5 * Ctrl |
| 10576934 | Fam155a       | NM_173446     | 2.03561e-009 | 2.7728  | E15.5 * Wnt1 up vs E15.5 * Ctrl |
| 10561927 | Aplp1         | NM_007467     | 3.88703e-007 | 2.76534 | E15.5 * Wnt1 up vs E15.5 * Ctrl |
| 10527732 | Fry           | ENSMUST000001 | 5.21633e-011 | 2.76385 | E15.5 * Wnt1 up vs E15.5 * Ctrl |
| 10436487 | Vgll3         | AK007165      | 1.56284e-007 | 2.76253 | E15.5 * Wnt1 up vs E15.5 * Ctrl |
| 10498720 | Zbbx          | NM_172515     | 1.56985e-010 | 2.76148 | E15.5 * Wnt1 up vs E15.5 * Ctrl |
| 10347734 | Sgpp2         | NM_001004173  | 2.20993e-010 | 2.75035 | E15.5 * Wnt1 up vs E15.5 * Ctrl |
| 10440621 | Grik1         | NM_146072     | 1.11544e-008 | 2.74621 | E15.5 * Wnt1 up vs E15.5 * Ctrl |
| 10399308 | Fkbp1b        | NM_016863     | 7.12473e-006 | 2.73458 | E15.5 * Wnt1 up vs E15.5 * Ctrl |
| 10351971 | Fmn2          | NM_019445     | 1.76127e-009 | 2.73246 | E15.5 * Wnt1 up vs E15.5 * Ctrl |
| 10576942 | ---           | ---           | 0.00133324   | 2.72629 | E15.5 * Wnt1 up vs E15.5 * Ctrl |
| 10353729 | 4930444G20Rik | NM_053264     | 1.47914e-005 | 2.72506 | E15.5 * Wnt1 up vs E15.5 * Ctrl |
| 10345350 | ---           | ---           | 5.4972e-010  | 2.72205 | E15.5 * Wnt1 up vs E15.5 * Ctrl |
| 10433953 | Ypel1         | NM_023249     | 3.11553e-010 | 2.72148 | E15.5 * Wnt1 up vs E15.5 * Ctrl |
| 10347188 | A830006F12Rik | NM_177164     | 1.08137e-007 | 2.7186  | E15.5 * Wnt1 up vs E15.5 * Ctrl |
| 10555118 | Pak1          | NM_011035     | 9.1141e-011  | 2.71727 | E15.5 * Wnt1 up vs E15.5 * Ctrl |
| 10519951 | Pion          | NM_175437     | 4.02792e-008 | 2.71283 | E15.5 * Wnt1 up vs E15.5 * Ctrl |
| 10395457 | Etv1          | NM_007960     | 7.64208e-009 | 2.70644 | E15.5 * Wnt1 up vs E15.5 * Ctrl |
| 10505568 | Frmd3         | NM_172869     | 3.57177e-008 | 2.7031  | E15.5 * Wnt1 up vs E15.5 * Ctrl |
| 10393594 | D11Bwg0517e   | NM_001039167  | 2.82929e-008 | 2.6947  | E15.5 * Wnt1 up vs E15.5 * Ctrl |
| 10375322 | 4933415A04Rik | ENSMUST000001 | 2.27938e-009 | 2.69215 | E15.5 * Wnt1 up vs E15.5 * Ctrl |
| 10445325 | Rcan2         | NM_030598     | 6.43936e-007 | 2.6879  | E15.5 * Wnt1 up vs E15.5 * Ctrl |
| 10416887 | Slain1        | NM_198014     | 1.46496e-007 | 2.67741 | E15.5 * Wnt1 up vs E15.5 * Ctrl |
| 10371092 | Atcay         | NM_178662     | 2.76295e-007 | 2.66844 | E15.5 * Wnt1 up vs E15.5 * Ctrl |
| 10519855 | Cacna2d1      | NM_001110843  | 1.7666e-007  | 2.66478 | E15.5 * Wnt1 up vs E15.5 * Ctrl |
| 10352554 | ---           | ---           | 5.20318e-008 | 2.66175 | E15.5 * Wnt1 up vs E15.5 * Ctrl |
| 10598493 | Pcsk1n        | NM_013892     | 4.58823e-010 | 2.66016 | E15.5 * Wnt1 up vs E15.5 * Ctrl |
| 10362003 | F730021E23Rik | AK155606      | 8.23186e-005 | 2.65865 | E15.5 * Wnt1 up vs E15.5 * Ctrl |

|          |               |              |              |         |                                 |
|----------|---------------|--------------|--------------|---------|---------------------------------|
| 10366229 | Lin7a         | NM_001039354 | 3.63908e-008 | 2.65164 | E15.5 * Wnt1 up vs E15.5 * Ctrl |
| 10415132 | Cmtm5         | NM_026066    | 3.88332e-009 | 2.64949 | E15.5 * Wnt1 up vs E15.5 * Ctrl |
| 10361191 | Syt14         | NM_181546    | 5.24757e-010 | 2.64429 | E15.5 * Wnt1 up vs E15.5 * Ctrl |
| 10564137 | ---           | ---          | 1.09882e-006 | 2.63886 | E15.5 * Wnt1 up vs E15.5 * Ctrl |
| 10352092 | Zfp238        | NM_001012330 | 8.10568e-010 | 2.63503 | E15.5 * Wnt1 up vs E15.5 * Ctrl |
| 10507379 | Zswim5        | NM_001029912 | 1.67781e-009 | 2.63416 | E15.5 * Wnt1 up vs E15.5 * Ctrl |
| 10363786 | Ank3          | NM_146005    | 2.99457e-009 | 2.63407 | E15.5 * Wnt1 up vs E15.5 * Ctrl |
| 10400057 | Arl4a         | NM_001039515 | 5.79876e-011 | 2.63262 | E15.5 * Wnt1 up vs E15.5 * Ctrl |
| 10499093 | ---           | ---          | 1.3329e-007  | 2.62962 | E15.5 * Wnt1 up vs E15.5 * Ctrl |
| 10510286 | Mad2l2        | NM_027985    | 7.81812e-010 | 2.62559 | E15.5 * Wnt1 up vs E15.5 * Ctrl |
| 10513869 | Megf9         | NM_172694    | 1.1383e-012  | 2.6253  | E15.5 * Wnt1 up vs E15.5 * Ctrl |
| 10503216 | Chd7          | NM_001081417 | 2.249e-009   | 2.62362 | E15.5 * Wnt1 up vs E15.5 * Ctrl |
| 10570178 | A230072I06Rik | ENSMUST00000 | 3.8589e-006  | 2.62323 | E15.5 * Wnt1 up vs E15.5 * Ctrl |
| 10401359 | Dpf3          | NM_058212    | 6.19634e-009 | 2.62138 | E15.5 * Wnt1 up vs E15.5 * Ctrl |
| 10520318 | Dpp6          | NM_010075    | 6.70115e-012 | 2.61713 | E15.5 * Wnt1 up vs E15.5 * Ctrl |
| 10347073 | Unc80         | FJ210934     | 5.50083e-010 | 2.61322 | E15.5 * Wnt1 up vs E15.5 * Ctrl |
| 10420532 | Atp8a2        | NM_015803    | 1.02645e-010 | 2.61289 | E15.5 * Wnt1 up vs E15.5 * Ctrl |
| 10563931 | ---           | ---          | 1.45693e-006 | 2.60486 | E15.5 * Wnt1 up vs E15.5 * Ctrl |
| 10606069 | 4930444G20Rik | NM_053264    | 2.26026e-005 | 2.59776 | E15.5 * Wnt1 up vs E15.5 * Ctrl |
| 10452734 | Alk           | NM_007439    | 1.75745e-009 | 2.59203 | E15.5 * Wnt1 up vs E15.5 * Ctrl |
| 10554588 | Sh3gl3        | NM_017400    | 3.4778e-007  | 2.59174 | E15.5 * Wnt1 up vs E15.5 * Ctrl |
| 10408798 | Tcfap2a       | NM_011547    | 2.95221e-008 | 2.58929 | E15.5 * Wnt1 up vs E15.5 * Ctrl |
| 10392910 | C630004H02Rik | BC024617     | 9.63819e-006 | 2.58514 | E15.5 * Wnt1 up vs E15.5 * Ctrl |
| 10429083 | Kcnq3         | NM_152923    | 1.48909e-011 | 2.58123 | E15.5 * Wnt1 up vs E15.5 * Ctrl |
| 10459835 | ---           | ---          | 1.56182e-007 | 2.58087 | E15.5 * Wnt1 up vs E15.5 * Ctrl |
| 10549536 | Amn1          | NM_001113424 | 2.88449e-009 | 2.57251 | E15.5 * Wnt1 up vs E15.5 * Ctrl |
| 10368981 | Lin28b        | NM_001031772 | 6.98215e-009 | 2.57163 | E15.5 * Wnt1 up vs E15.5 * Ctrl |
| 10496854 | Ttll7         | NM_027594    | 3.43955e-008 | 2.5705  | E15.5 * Wnt1 up vs E15.5 * Ctrl |
| 10355024 | Ica1l         | NM_027407    | 3.09437e-009 | 2.56771 | E15.5 * Wnt1 up vs E15.5 * Ctrl |
| 10510725 | Chd5          | NM_001081376 | 1.8583e-010  | 2.56074 | E15.5 * Wnt1 up vs E15.5 * Ctrl |
| 10569646 | Ccnd1         | NM_007631    | 6.36632e-010 | 2.55987 | E15.5 * Wnt1 up vs E15.5 * Ctrl |
| 10519815 | Cacna2d1      | NM_001110843 | 1.68208e-008 | 2.55721 | E15.5 * Wnt1 up vs E15.5 * Ctrl |
| 10527799 | ENSMUSG0000C  | AK041221     | 8.63194e-005 | 2.55659 | E15.5 * Wnt1 up vs E15.5 * Ctrl |
| 10594301 | Coro2b        | NM_175484    | 6.19134e-008 | 2.55469 | E15.5 * Wnt1 up vs E15.5 * Ctrl |
| 10408850 | Nedd9         | NM_001111324 | 1.16381e-010 | 2.55432 | E15.5 * Wnt1 up vs E15.5 * Ctrl |
| 10540880 | Syn2          | NM_001111015 | 2.49745e-009 | 2.55241 | E15.5 * Wnt1 up vs E15.5 * Ctrl |
| 10492165 | ---           | ---          | 3.41144e-005 | 2.55213 | E15.5 * Wnt1 up vs E15.5 * Ctrl |
| 10392056 | Cyb561        | NM_007805    | 2.35116e-007 | 2.55172 | E15.5 * Wnt1 up vs E15.5 * Ctrl |
| 10376747 | Kcnj12        | NM_010603    | 2.79943e-008 | 2.55126 | E15.5 * Wnt1 up vs E15.5 * Ctrl |
| 10375313 | Ccnj1         | NM_001045530 | 1.60577e-008 | 2.55077 | E15.5 * Wnt1 up vs E15.5 * Ctrl |
| 10575616 | Gabrarpl2     | AK134873     | 7.53149e-005 | 2.54223 | E15.5 * Wnt1 up vs E15.5 * Ctrl |
| 10569278 | 5530400B01Rik | ENSMUST00000 | 3.61245e-006 | 2.53886 | E15.5 * Wnt1 up vs E15.5 * Ctrl |
| 10495613 | 4833424O15Rik | NM_029425    | 2.04123e-007 | 2.53675 | E15.5 * Wnt1 up vs E15.5 * Ctrl |
| 10392369 | Cacng4        | NM_019431    | 2.85918e-009 | 2.5361  | E15.5 * Wnt1 up vs E15.5 * Ctrl |
| 10570513 | 2900016B01Rik | ENSMUST00000 | 6.82607e-008 | 2.53592 | E15.5 * Wnt1 up vs E15.5 * Ctrl |
| 10462922 | P1ce1         | NM_019588    | 4.77911e-012 | 2.53573 | E15.5 * Wnt1 up vs E15.5 * Ctrl |
| 10406934 | Etv1          | NM_007960    | 1.42245e-009 | 2.53102 | E15.5 * Wnt1 up vs E15.5 * Ctrl |
| 10496837 | Ttll7         | NM_027594    | 1.21052e-006 | 2.53084 | E15.5 * Wnt1 up vs E15.5 * Ctrl |
| 10444135 | AA388235      | NM_001013793 | 9.4989e-005  | 2.52846 | E15.5 * Wnt1 up vs E15.5 * Ctrl |
| 10409737 | Agtppb1       | NM_023328    | 8.6117e-011  | 2.52752 | E15.5 * Wnt1 up vs E15.5 * Ctrl |
| 10559146 | Brsk2         | NM_029426    | 5.26002e-009 | 2.52667 | E15.5 * Wnt1 up vs E15.5 * Ctrl |
| 10420988 | Dpysl2        | NM_009955    | 4.82962e-007 | 2.52154 | E15.5 * Wnt1 up vs E15.5 * Ctrl |
| 10446553 | Epb4.1l3      | NM_013813    | 6.90288e-012 | 2.52147 | E15.5 * Wnt1 up vs E15.5 * Ctrl |
| 10476594 | MacroD2       | NM_001013802 | 0.000806975  | 2.51961 | E15.5 * Wnt1 up vs E15.5 * Ctrl |
| 10355214 | ldh1          | NM_010497    | 1.99261e-011 | 2.51798 | E15.5 * Wnt1 up vs E15.5 * Ctrl |
| 10600814 | Gspt2         | NM_008179    | 7.23471e-005 | 2.51598 | E15.5 * Wnt1 up vs E15.5 * Ctrl |
| 10550638 | Rtn2          | NM_013648    | 2.56481e-011 | 2.51351 | E15.5 * Wnt1 up vs E15.5 * Ctrl |
| 10562532 | Zfp536        | NM_172385    | 3.18803e-008 | 2.5072  | E15.5 * Wnt1 up vs E15.5 * Ctrl |
| 10515111 | ---           | ---          | 0.00653382   | 2.50596 | E15.5 * Wnt1 up vs E15.5 * Ctrl |
| 10472366 | Scn2a1        | NM_001099298 | 1.4321e-005  | 2.50548 | E15.5 * Wnt1 up vs E15.5 * Ctrl |
| 10568298 | Stx1b         | NM_024414    | 2.72252e-008 | 2.50005 | E15.5 * Wnt1 up vs E15.5 * Ctrl |
| 10425852 | Parvb         | NM_133167    | 1.06869e-006 | 2.49894 | E15.5 * Wnt1 up vs E15.5 * Ctrl |
| 10392943 | Hn1           | NM_008258    | 6.26783e-009 | 2.49581 | E15.5 * Wnt1 up vs E15.5 * Ctrl |
| 10573348 | Cacna1a       | NM_007578    | 7.10042e-010 | 2.49439 | E15.5 * Wnt1 up vs E15.5 * Ctrl |
| 10522655 | C530008M17Rik | ENSMUST00000 | 0.000117844  | 2.49387 | E15.5 * Wnt1 up vs E15.5 * Ctrl |
| 10503190 | Chd7          | NM_001081417 | 4.27601e-008 | 2.49348 | E15.5 * Wnt1 up vs E15.5 * Ctrl |

|          |               |               |              |         |                                 |
|----------|---------------|---------------|--------------|---------|---------------------------------|
| 10439016 | 4930444G20Rik | NM_053264     | 4.19418e-005 | 2.49283 | E15.5 * Wnt1 up vs E15.5 * Ctrl |
| 10355984 | Serpine2      | NM_009255     | 3.26834e-012 | 2.4896  | E15.5 * Wnt1 up vs E15.5 * Ctrl |
| 10350742 | Rnase1        | NM_011882     | 7.48878e-006 | 2.48234 | E15.5 * Wnt1 up vs E15.5 * Ctrl |
| 10527233 | Cyth3         | NM_011182     | 4.82006e-011 | 2.47168 | E15.5 * Wnt1 up vs E15.5 * Ctrl |
| 10491846 | ---           | ---           | 0.000470788  | 2.47161 | E15.5 * Wnt1 up vs E15.5 * Ctrl |
| 10460123 | 9330132A10Rik | BC098197      | 3.03737e-007 | 2.47086 | E15.5 * Wnt1 up vs E15.5 * Ctrl |
| 10481845 | Fam125b       | BC059907      | 6.671e-009   | 2.4696  | E15.5 * Wnt1 up vs E15.5 * Ctrl |
| 10348999 | Cdh20         | NM_011800     | 3.2342e-007  | 2.46398 | E15.5 * Wnt1 up vs E15.5 * Ctrl |
| 10559580 | Syt5          | NM_016908     | 1.76891e-008 | 2.46067 | E15.5 * Wnt1 up vs E15.5 * Ctrl |
| 10490602 | Eef1a2        | NM_007906     | 7.34768e-010 | 2.45728 | E15.5 * Wnt1 up vs E15.5 * Ctrl |
| 10381154 | Cnp           | NM_009923     | 1.43997e-008 | 2.4546  | E15.5 * Wnt1 up vs E15.5 * Ctrl |
| 10524889 | Ksr2          | NM_001114545  | 3.46156e-009 | 2.44661 | E15.5 * Wnt1 up vs E15.5 * Ctrl |
| 10499643 | Chrn2         | NM_009602     | 2.75612e-008 | 2.44595 | E15.5 * Wnt1 up vs E15.5 * Ctrl |
| 10428511 | Csmd3         | NM_001081391  | 1.22155e-006 | 2.44226 | E15.5 * Wnt1 up vs E15.5 * Ctrl |
| 10607562 | Cnksr2        | NM_177751     | 1.34139e-008 | 2.44003 | E15.5 * Wnt1 up vs E15.5 * Ctrl |
| 10601152 | Nlgn3         | NM_172932     | 1.65643e-009 | 2.4393  | E15.5 * Wnt1 up vs E15.5 * Ctrl |
| 10451213 | Rsph9         | NM_029338     | 2.21044e-007 | 2.43666 | E15.5 * Wnt1 up vs E15.5 * Ctrl |
| 10600390 | Gdi1          | NM_010273     | 1.32119e-009 | 2.43636 | E15.5 * Wnt1 up vs E15.5 * Ctrl |
| 10424781 | Grina         | NM_023168     | 1.86607e-008 | 2.42573 | E15.5 * Wnt1 up vs E15.5 * Ctrl |
| 10585905 | Parp6         | NM_029922     | 3.35644e-010 | 2.42552 | E15.5 * Wnt1 up vs E15.5 * Ctrl |
| 10445944 | St6gal2       | NM_172829     | 2.72775e-006 | 2.42224 | E15.5 * Wnt1 up vs E15.5 * Ctrl |
| 10526191 | Gatsl2        | BC026208      | 8.5957e-008  | 2.41589 | E15.5 * Wnt1 up vs E15.5 * Ctrl |
| 10555570 | Phox2a        | NM_008887     | 3.29655e-007 | 2.41533 | E15.5 * Wnt1 up vs E15.5 * Ctrl |
| 10556178 | Tub           | NM_021885     | 6.54489e-009 | 2.41257 | E15.5 * Wnt1 up vs E15.5 * Ctrl |
| 10435748 | D930030D11Rik | ENSMUST000001 | 9.97657e-005 | 2.41126 | E15.5 * Wnt1 up vs E15.5 * Ctrl |
| 10372342 | Nav3          | NM_001081035  | 1.57565e-009 | 2.40988 | E15.5 * Wnt1 up vs E15.5 * Ctrl |
| 10404792 | Phactr1       | NM_198419     | 5.75388e-009 | 2.40956 | E15.5 * Wnt1 up vs E15.5 * Ctrl |
| 10466374 | Tle4          | NM_011600     | 1.07034e-011 | 2.40487 | E15.5 * Wnt1 up vs E15.5 * Ctrl |
| 10544768 | Hoxa5         | NM_010453     | 1.41515e-005 | 2.40459 | E15.5 * Wnt1 up vs E15.5 * Ctrl |
| 10468762 | 4930506M07Rik | NM_001114312  | 1.04835e-007 | 2.40452 | E15.5 * Wnt1 up vs E15.5 * Ctrl |
| 10464283 | ENSMUSG000001 | ENSMUST000001 | 1.07541e-008 | 2.40327 | E15.5 * Wnt1 up vs E15.5 * Ctrl |
| 10395005 | Kidins220     | NM_001081378  | 6.57934e-012 | 2.40009 | E15.5 * Wnt1 up vs E15.5 * Ctrl |
| 10470412 | Dbh           | NM_138942     | 9.9693e-008  | 2.39873 | E15.5 * Wnt1 up vs E15.5 * Ctrl |
| 10530013 | Gm447         | BC025881      | 2.11151e-005 | 2.39381 | E15.5 * Wnt1 up vs E15.5 * Ctrl |
| 10496975 | Slc44a5       | NM_001081263  | 6.55462e-006 | 2.39347 | E15.5 * Wnt1 up vs E15.5 * Ctrl |
| 10449920 | Zfp811        | NM_183177     | 1.0532e-006  | 2.39158 | E15.5 * Wnt1 up vs E15.5 * Ctrl |
| 10444756 | Atp6v1g2      | NM_023179     | 3.35248e-007 | 2.39057 | E15.5 * Wnt1 up vs E15.5 * Ctrl |
| 10565910 | Plekhhb1      | NM_013746     | 4.18563e-007 | 2.39042 | E15.5 * Wnt1 up vs E15.5 * Ctrl |
| 10356305 | Htr2b         | NM_008311     | 1.86708e-007 | 2.38919 | E15.5 * Wnt1 up vs E15.5 * Ctrl |
| 10579554 | Unc13a        | NM_001029873  | 7.51316e-009 | 2.38842 | E15.5 * Wnt1 up vs E15.5 * Ctrl |
| 10569163 | Cend1         | NM_021316     | 1.78655e-008 | 2.38684 | E15.5 * Wnt1 up vs E15.5 * Ctrl |
| 10472408 | Csrnp3        | NM_153409     | 1.01355e-007 | 2.376   | E15.5 * Wnt1 up vs E15.5 * Ctrl |
| 10355813 | Ptpn          | NM_008985     | 4.35982e-009 | 2.37518 | E15.5 * Wnt1 up vs E15.5 * Ctrl |
| 10503220 | Chd7          | NM_001081417  | 1.44999e-006 | 2.37375 | E15.5 * Wnt1 up vs E15.5 * Ctrl |
| 10360479 | Cep170        | NM_001099637  | 1.0616e-010  | 2.37144 | E15.5 * Wnt1 up vs E15.5 * Ctrl |
| 10607302 | Gnl3l         | NM_198110     | 1.47209e-011 | 2.36831 | E15.5 * Wnt1 up vs E15.5 * Ctrl |
| 10430458 | Sox10         | NM_011437     | 2.37138e-006 | 2.36489 | E15.5 * Wnt1 up vs E15.5 * Ctrl |
| 10566457 | Apbb1         | NM_009685     | 2.37246e-008 | 2.3643  | E15.5 * Wnt1 up vs E15.5 * Ctrl |
| 10498210 | Nbea          | NM_030595     | 4.08071e-012 | 2.36414 | E15.5 * Wnt1 up vs E15.5 * Ctrl |
| 10451763 | Satb1         | NM_009122     | 2.68247e-012 | 2.36409 | E15.5 * Wnt1 up vs E15.5 * Ctrl |
| 10429325 | ---           | ---           | 0.00013198   | 2.3564  | E15.5 * Wnt1 up vs E15.5 * Ctrl |
| 10461057 | Rcor2         | NM_054048     | 1.84764e-006 | 2.35567 | E15.5 * Wnt1 up vs E15.5 * Ctrl |
| 10497329 | ---           | ---           | 4.29011e-005 | 2.35154 | E15.5 * Wnt1 up vs E15.5 * Ctrl |
| 10494372 | Sv2a          | NM_022030     | 2.50215e-005 | 2.34912 | E15.5 * Wnt1 up vs E15.5 * Ctrl |
| 10551104 | Tmem145       | NM_183311     | 2.27343e-008 | 2.34911 | E15.5 * Wnt1 up vs E15.5 * Ctrl |
| 10498309 | Pfn2          | NM_019410     | 3.73529e-008 | 2.34874 | E15.5 * Wnt1 up vs E15.5 * Ctrl |
| 10600765 | Pcyt1b        | NM_211138     | 4.07252e-010 | 2.34358 | E15.5 * Wnt1 up vs E15.5 * Ctrl |
| 10448081 | Rgmb          | NM_178615     | 2.5456e-012  | 2.34195 | E15.5 * Wnt1 up vs E15.5 * Ctrl |
| 10531866 | Mapk10        | NM_009158     | 4.31735e-008 | 2.34109 | E15.5 * Wnt1 up vs E15.5 * Ctrl |
| 10435769 | Zbtb20        | NM_019778     | 1.91113e-009 | 2.34078 | E15.5 * Wnt1 up vs E15.5 * Ctrl |
| 10350113 | Arl8a         | NM_026823     | 9.02222e-008 | 2.33756 | E15.5 * Wnt1 up vs E15.5 * Ctrl |
| 10423230 | Cdh9          | NM_009869     | 3.2154e-008  | 2.33663 | E15.5 * Wnt1 up vs E15.5 * Ctrl |
| 10540333 | Cntn6         | NM_017383     | 9.80919e-007 | 2.33489 | E15.5 * Wnt1 up vs E15.5 * Ctrl |
| 10587107 | Myo5a         | NM_010864     | 2.23643e-012 | 2.33366 | E15.5 * Wnt1 up vs E15.5 * Ctrl |
| 10494007 | Them4         | NM_029431     | 4.29598e-007 | 2.33142 | E15.5 * Wnt1 up vs E15.5 * Ctrl |
| 10491960 | ---           | ---           | 0.00734362   | 2.3314  | E15.5 * Wnt1 up vs E15.5 * Ctrl |

|          |               |              |              |         |                                 |
|----------|---------------|--------------|--------------|---------|---------------------------------|
| 10434758 | St6gal1       | NM_145933    | 2.75214e-010 | 2.32989 | E15.5 * Wnt1 up vs E15.5 * Ctrl |
| 10458534 | Pcdh1         | NM_029357    | 4.75491e-007 | 2.32827 | E15.5 * Wnt1 up vs E15.5 * Ctrl |
| 10554667 | Tmc3          | NM_177695    | 1.10485e-010 | 2.324   | E15.5 * Wnt1 up vs E15.5 * Ctrl |
| 10363455 | Pcbd1         | NM_025273    | 3.16004e-007 | 2.32316 | E15.5 * Wnt1 up vs E15.5 * Ctrl |
| 10447502 | Adcyap1       | NM_009625    | 1.81178e-006 | 2.32271 | E15.5 * Wnt1 up vs E15.5 * Ctrl |
| 10395414 | Tmem195       | NM_178767    | 2.13136e-005 | 2.32154 | E15.5 * Wnt1 up vs E15.5 * Ctrl |
| 10539169 | Lrrtm1        | NM_028880    | 1.91102e-007 | 2.31991 | E15.5 * Wnt1 up vs E15.5 * Ctrl |
| 10552075 | Lgi4          | NM_144556    | 1.05305e-007 | 2.31887 | E15.5 * Wnt1 up vs E15.5 * Ctrl |
| 10358457 | Bex4          | NM_212457    | 1.03857e-008 | 2.31831 | E15.5 * Wnt1 up vs E15.5 * Ctrl |
| 10606868 | Bex1          | NM_009052    | 4.13111e-008 | 2.31794 | E15.5 * Wnt1 up vs E15.5 * Ctrl |
| 10601569 | Pcdh11x       | NM_001081385 | 0.00102581   | 2.31772 | E15.5 * Wnt1 up vs E15.5 * Ctrl |
| 10362513 | Hs3st5        | NM_001081208 | 9.87488e-008 | 2.31748 | E15.5 * Wnt1 up vs E15.5 * Ctrl |
| 10568735 | Ebf3          | NM_001113415 | 6.63865e-009 | 2.31578 | E15.5 * Wnt1 up vs E15.5 * Ctrl |
| 10492174 | Tm4sf4        | NM_145539    | 7.74061e-005 | 2.31556 | E15.5 * Wnt1 up vs E15.5 * Ctrl |
| 10370072 | Prmt2         | NM_133182    | 4.61868e-007 | 2.30986 | E15.5 * Wnt1 up vs E15.5 * Ctrl |
| 10401987 | Kcnk10        | NM_029911    | 4.80942e-007 | 2.30949 | E15.5 * Wnt1 up vs E15.5 * Ctrl |
| 10585823 | LOC665268     | XM_001479935 | 3.60529e-005 | 2.30797 | E15.5 * Wnt1 up vs E15.5 * Ctrl |
| 10589368 | Plxnb1        | NM_172775    | 2.26179e-006 | 2.30379 | E15.5 * Wnt1 up vs E15.5 * Ctrl |
| 10375002 | Cpeb4         | NM_026252    | 4.96933e-012 | 2.30098 | E15.5 * Wnt1 up vs E15.5 * Ctrl |
| 10592593 | Tecta         | NM_009347    | 7.7405e-008  | 2.30059 | E15.5 * Wnt1 up vs E15.5 * Ctrl |
| 10420023 | Fam158a       | AB054001     | 7.34702e-006 | 2.30015 | E15.5 * Wnt1 up vs E15.5 * Ctrl |
| 10550402 | Pnmal1        | NM_001007569 | 3.40993e-006 | 2.29562 | E15.5 * Wnt1 up vs E15.5 * Ctrl |
| 10345172 | ENSMUSG00000  | ENSMUST00000 | 1.42025e-005 | 2.29169 | E15.5 * Wnt1 up vs E15.5 * Ctrl |
| 10472382 | Scn2a1        | NM_001099298 | 2.92147e-006 | 2.2879  | E15.5 * Wnt1 up vs E15.5 * Ctrl |
| 10564203 | ---           | ---          | 0.00013838   | 2.28775 | E15.5 * Wnt1 up vs E15.5 * Ctrl |
| 10533401 | Cux2          | ENSMUST00000 | 2.7957e-007  | 2.28721 | E15.5 * Wnt1 up vs E15.5 * Ctrl |
| 10400302 | ---           | ---          | 0.00075114   | 2.28576 | E15.5 * Wnt1 up vs E15.5 * Ctrl |
| 10419966 | Zfhx2         | NM_001039198 | 2.84535e-007 | 2.28297 | E15.5 * Wnt1 up vs E15.5 * Ctrl |
| 10469020 | Bend7         | NM_178663    | 1.72063e-010 | 2.28063 | E15.5 * Wnt1 up vs E15.5 * Ctrl |
| 10422240 | Slitrk1       | NM_199065    | 4.34235e-006 | 2.27891 | E15.5 * Wnt1 up vs E15.5 * Ctrl |
| 10402604 | ---           | ---          | 3.78357e-006 | 2.27816 | E15.5 * Wnt1 up vs E15.5 * Ctrl |
| 10355474 | March4        | NM_001045533 | 7.51155e-008 | 2.27386 | E15.5 * Wnt1 up vs E15.5 * Ctrl |
| 10507032 | Bend5         | NM_026279    | 4.4108e-009  | 2.27325 | E15.5 * Wnt1 up vs E15.5 * Ctrl |
| 10507273 | Pik3r3        | NM_181585    | 5.54242e-012 | 2.27172 | E15.5 * Wnt1 up vs E15.5 * Ctrl |
| 10602428 | Wnk3          | ENSMUST00000 | 4.35337e-007 | 2.27111 | E15.5 * Wnt1 up vs E15.5 * Ctrl |
| 10433075 | 5730585A16Rik | ENSMUST00000 | 0.000124042  | 2.26931 | E15.5 * Wnt1 up vs E15.5 * Ctrl |
| 10501199 | Gstm7         | NM_026672    | 6.45893e-007 | 2.26887 | E15.5 * Wnt1 up vs E15.5 * Ctrl |
| 10416541 | Enox1         | NM_172813    | 2.81416e-010 | 2.26635 | E15.5 * Wnt1 up vs E15.5 * Ctrl |
| 10597323 | Arpp21        | NM_033264    | 3.62389e-010 | 2.26235 | E15.5 * Wnt1 up vs E15.5 * Ctrl |
| 10384691 | 0610010F05Rik | NM_027860    | 2.28415e-009 | 2.26129 | E15.5 * Wnt1 up vs E15.5 * Ctrl |
| 10538247 | Npy           | NM_023456    | 2.33879e-006 | 2.26104 | E15.5 * Wnt1 up vs E15.5 * Ctrl |
| 10446596 | Dlgap1        | NM_177639    | 5.56527e-008 | 2.2578  | E15.5 * Wnt1 up vs E15.5 * Ctrl |
| 10581571 | 4922502B01Rik | ENSMUST00000 | 2.40115e-007 | 2.25573 | E15.5 * Wnt1 up vs E15.5 * Ctrl |
| 10455084 | Pcdhb10       | NM_053135    | 3.54512e-005 | 2.25321 | E15.5 * Wnt1 up vs E15.5 * Ctrl |
| 10596051 | Tmem22        | NM_001101483 | 2.48294e-007 | 2.24975 | E15.5 * Wnt1 up vs E15.5 * Ctrl |
| 10536611 | Kcnd2         | NM_019697    | 4.05917e-007 | 2.24957 | E15.5 * Wnt1 up vs E15.5 * Ctrl |
| 10603814 | Slc9a7        | NM_177353    | 2.53922e-007 | 2.24842 | E15.5 * Wnt1 up vs E15.5 * Ctrl |
| 10400866 | Trim9         | NM_053167    | 1.15666e-007 | 2.24833 | E15.5 * Wnt1 up vs E15.5 * Ctrl |
| 10581266 | Tppp3         | NM_026481    | 3.80298e-008 | 2.24291 | E15.5 * Wnt1 up vs E15.5 * Ctrl |
| 10415980 | Fbxo16        | NM_015795    | 9.31281e-008 | 2.24196 | E15.5 * Wnt1 up vs E15.5 * Ctrl |
| 10605820 | Zc4h2         | NM_001003916 | 3.83048e-009 | 2.2395  | E15.5 * Wnt1 up vs E15.5 * Ctrl |
| 10454286 | Mapre2        | NM_153058    | 3.33475e-011 | 2.23764 | E15.5 * Wnt1 up vs E15.5 * Ctrl |
| 10581479 | Smpd3         | NM_021491    | 8.1665e-007  | 2.23448 | E15.5 * Wnt1 up vs E15.5 * Ctrl |
| 10547613 | Rimkb         | NM_027664    | 7.7487e-008  | 2.23153 | E15.5 * Wnt1 up vs E15.5 * Ctrl |
| 10497012 | BC007180      | BC138236     | 1.53994e-009 | 2.22718 | E15.5 * Wnt1 up vs E15.5 * Ctrl |
| 10566714 | Ric3          | NM_001038624 | 5.07769e-008 | 2.22666 | E15.5 * Wnt1 up vs E15.5 * Ctrl |
| 10564631 | Slco3a1       | NM_023908    | 5.44488e-008 | 2.22303 | E15.5 * Wnt1 up vs E15.5 * Ctrl |
| 10356020 | Dock10        | NM_175291    | 4.89807e-007 | 2.22189 | E15.5 * Wnt1 up vs E15.5 * Ctrl |
| 10576495 | Trim67        | BC094596     | 4.5926e-009  | 2.21935 | E15.5 * Wnt1 up vs E15.5 * Ctrl |
| 10539211 | Lrrtm4        | NR_027323    | 1.42356e-008 | 2.21364 | E15.5 * Wnt1 up vs E15.5 * Ctrl |
| 10482177 | Strbp         | NM_009261    | 7.18882e-007 | 2.21216 | E15.5 * Wnt1 up vs E15.5 * Ctrl |
| 10483131 | Kcnh7         | NM_133207    | 7.00514e-008 | 2.21117 | E15.5 * Wnt1 up vs E15.5 * Ctrl |
| 10593927 | Scamp5        | NM_020270    | 4.08352e-007 | 2.20641 | E15.5 * Wnt1 up vs E15.5 * Ctrl |
| 10559825 | 2810409K11Rik | BC117497     | 0.000137751  | 2.20602 | E15.5 * Wnt1 up vs E15.5 * Ctrl |
| 10392388 | Prkca         | NM_011101    | 4.95867e-009 | 2.20295 | E15.5 * Wnt1 up vs E15.5 * Ctrl |
| 10423333 | Fam134b       | NM_001034851 | 1.67807e-008 | 2.19974 | E15.5 * Wnt1 up vs E15.5 * Ctrl |

|          |               |               |              |         |                                 |
|----------|---------------|---------------|--------------|---------|---------------------------------|
| 10592140 | Ddx25         | NM_013932     | 4.02725e-007 | 2.19914 | E15.5 * Wnt1 up vs E15.5 * Ctrl |
| 10555568 | Rpl31         | BC092139      | 3.19176e-006 | 2.19515 | E15.5 * Wnt1 up vs E15.5 * Ctrl |
| 10602688 | Usp51         | NM_001137547  | 0.001217     | 2.19449 | E15.5 * Wnt1 up vs E15.5 * Ctrl |
| 10527148 | Slc29a4       | NM_146257     | 1.02631e-009 | 2.19174 | E15.5 * Wnt1 up vs E15.5 * Ctrl |
| 10364149 | S100b         | NM_009115     | 7.10507e-006 | 2.19147 | E15.5 * Wnt1 up vs E15.5 * Ctrl |
| 10465395 | Ppp2r5b       | NM_198168     | 5.24404e-005 | 2.1914  | E15.5 * Wnt1 up vs E15.5 * Ctrl |
| 10404702 | Gcnt2         | NM_023887     | 9.86475e-009 | 2.18979 | E15.5 * Wnt1 up vs E15.5 * Ctrl |
| 10574350 | Mmp15         | NM_008609     | 4.57691e-007 | 2.18687 | E15.5 * Wnt1 up vs E15.5 * Ctrl |
| 10503204 | Chd7          | NM_001081417  | 1.99624e-007 | 2.18497 | E15.5 * Wnt1 up vs E15.5 * Ctrl |
| 10425158 | Pdpx          | NM_020271     | 5.63777e-007 | 2.18448 | E15.5 * Wnt1 up vs E15.5 * Ctrl |
| 10368556 | Hey2          | NM_013904     | 1.05412e-006 | 2.18074 | E15.5 * Wnt1 up vs E15.5 * Ctrl |
| 10435789 | Zbtb20        | ENSMUST000001 | 8.49754e-007 | 2.17878 | E15.5 * Wnt1 up vs E15.5 * Ctrl |
| 10601850 | Bex4          | NM_212457     | 6.59854e-009 | 2.17428 | E15.5 * Wnt1 up vs E15.5 * Ctrl |
| 10352867 | Plxna2        | NM_008882     | 1.39719e-008 | 2.17319 | E15.5 * Wnt1 up vs E15.5 * Ctrl |
| 10518147 | Pdpx          | NM_010329     | 7.72993e-006 | 2.17187 | E15.5 * Wnt1 up vs E15.5 * Ctrl |
| 10472368 | Scn2a1        | NM_001099298  | 3.6595e-005  | 2.17138 | E15.5 * Wnt1 up vs E15.5 * Ctrl |
| 10390542 | Cacnb1        | NM_031173     | 7.97663e-007 | 2.17036 | E15.5 * Wnt1 up vs E15.5 * Ctrl |
| 10394674 | Socs2         | NM_007706     | 3.6574e-005  | 2.17036 | E15.5 * Wnt1 up vs E15.5 * Ctrl |
| 10518428 | Cln6          | NM_011929     | 3.20517e-006 | 2.1692  | E15.5 * Wnt1 up vs E15.5 * Ctrl |
| 10551065 | D930028M14Rik | ENSMUST000001 | 8.83254e-008 | 2.16444 | E15.5 * Wnt1 up vs E15.5 * Ctrl |
| 10571353 | 6430573F11Rik | BC052184      | 2.03954e-007 | 2.16431 | E15.5 * Wnt1 up vs E15.5 * Ctrl |
| 10475247 | Tmem62        | NM_175285     | 1.43662e-005 | 2.1637  | E15.5 * Wnt1 up vs E15.5 * Ctrl |
| 10567589 | Usp31         | NM_001033173  | 2.45469e-005 | 2.16205 | E15.5 * Wnt1 up vs E15.5 * Ctrl |
| 10368484 | ENSMUSG000001 | ENSMUST000001 | 1.01217e-008 | 2.16161 | E15.5 * Wnt1 up vs E15.5 * Ctrl |
| 10590865 | Cntn5         | NM_001033359  | 2.38069e-008 | 2.16035 | E15.5 * Wnt1 up vs E15.5 * Ctrl |
| 10538290 | Snx10         | NM_028035     | 2.94163e-008 | 2.15923 | E15.5 * Wnt1 up vs E15.5 * Ctrl |
| 10375432 | C030019I05Rik | NM_177075     | 9.47152e-005 | 2.15598 | E15.5 * Wnt1 up vs E15.5 * Ctrl |
| 10563939 | ---           | ---           | 0.000242286  | 2.15571 | E15.5 * Wnt1 up vs E15.5 * Ctrl |
| 10440849 | Synj1         | ENSMUST000001 | 1.18374e-009 | 2.1544  | E15.5 * Wnt1 up vs E15.5 * Ctrl |
| 10513776 | Astn2         | NM_207109     | 1.81123e-007 | 2.15362 | E15.5 * Wnt1 up vs E15.5 * Ctrl |
| 10580469 | Cbln1         | NM_019626     | 2.69742e-007 | 2.15311 | E15.5 * Wnt1 up vs E15.5 * Ctrl |
| 10546977 | Atp2b2        | NM_009723     | 3.05683e-009 | 2.14981 | E15.5 * Wnt1 up vs E15.5 * Ctrl |
| 10423836 | Cthrc1        | NM_026778     | 4.57453e-009 | 2.14698 | E15.5 * Wnt1 up vs E15.5 * Ctrl |
| 10549879 | Usp29         | NM_021323     | 2.65719e-007 | 2.14641 | E15.5 * Wnt1 up vs E15.5 * Ctrl |
| 10563915 | ---           | ---           | 1.14192e-007 | 2.14486 | E15.5 * Wnt1 up vs E15.5 * Ctrl |
| 10563929 | ---           | ---           | 1.14192e-007 | 2.14486 | E15.5 * Wnt1 up vs E15.5 * Ctrl |
| 10419170 | Txndc16       | NM_172597     | 1.03464e-006 | 2.14436 | E15.5 * Wnt1 up vs E15.5 * Ctrl |
| 10448967 | Sox8          | NM_011447     | 4.43586e-007 | 2.14291 | E15.5 * Wnt1 up vs E15.5 * Ctrl |
| 10430282 | Cacng2        | NM_007583     | 7.02155e-007 | 2.14147 | E15.5 * Wnt1 up vs E15.5 * Ctrl |
| 10501963 | Ugt8a         | NM_011674     | 6.71504e-005 | 2.14027 | E15.5 * Wnt1 up vs E15.5 * Ctrl |
| 10506004 | Hook1         | NM_030014     | 1.67583e-007 | 2.13941 | E15.5 * Wnt1 up vs E15.5 * Ctrl |
| 10545099 | ---           | ---           | 5.51028e-005 | 2.13738 | E15.5 * Wnt1 up vs E15.5 * Ctrl |
| 10417048 | Hs6st3        | NM_015820     | 3.52374e-008 | 2.13631 | E15.5 * Wnt1 up vs E15.5 * Ctrl |
| 10551410 | Zfp60         | NM_009560     | 9.75167e-008 | 2.13547 | E15.5 * Wnt1 up vs E15.5 * Ctrl |
| 10347226 | Tmem169       | NM_175564     | 1.02141e-006 | 2.13373 | E15.5 * Wnt1 up vs E15.5 * Ctrl |
| 10503192 | Chd7          | NM_001081417  | 3.82738e-007 | 2.13231 | E15.5 * Wnt1 up vs E15.5 * Ctrl |
| 10588755 | Camkv         | NM_145621     | 4.61763e-006 | 2.13017 | E15.5 * Wnt1 up vs E15.5 * Ctrl |
| 10353460 | Kcnq5         | NM_023872     | 6.41596e-008 | 2.12978 | E15.5 * Wnt1 up vs E15.5 * Ctrl |
| 10437580 | ---           | ---           | 4.703e-006   | 2.12955 | E15.5 * Wnt1 up vs E15.5 * Ctrl |
| 10485580 | Cstf3         | NM_145529     | 1.9563e-005  | 2.12825 | E15.5 * Wnt1 up vs E15.5 * Ctrl |
| 10474064 | Trp53i11      | NM_001025246  | 2.80627e-005 | 2.12686 | E15.5 * Wnt1 up vs E15.5 * Ctrl |
| 10532784 | Svop          | NM_026805     | 4.22999e-007 | 2.12632 | E15.5 * Wnt1 up vs E15.5 * Ctrl |
| 10524621 | Oasl2         | NM_011854     | 7.2176e-009  | 2.1184  | E15.5 * Wnt1 up vs E15.5 * Ctrl |
| 10540233 | Fam19a1       | NM_182808     | 9.13737e-007 | 2.11525 | E15.5 * Wnt1 up vs E15.5 * Ctrl |
| 10476401 | Plcb1         | NM_019677     | 4.43327e-007 | 2.11251 | E15.5 * Wnt1 up vs E15.5 * Ctrl |
| 10572070 | Npy1r         | NM_010934     | 1.25795e-006 | 2.11107 | E15.5 * Wnt1 up vs E15.5 * Ctrl |
| 10418817 | Chat          | NM_009891     | 1.60276e-008 | 2.10966 | E15.5 * Wnt1 up vs E15.5 * Ctrl |
| 10499981 | Oaz3          | NM_016901     | 5.01934e-007 | 2.10731 | E15.5 * Wnt1 up vs E15.5 * Ctrl |
| 10529923 | Lcorl         | NM_172153     | 5.38799e-007 | 2.10705 | E15.5 * Wnt1 up vs E15.5 * Ctrl |
| 10434629 | Map3k13       | NM_172821     | 5.74661e-007 | 2.10551 | E15.5 * Wnt1 up vs E15.5 * Ctrl |
| 10379223 | 1810012P15Rik | NM_001076681  | 9.23254e-007 | 2.10109 | E15.5 * Wnt1 up vs E15.5 * Ctrl |
| 10492826 | Fbxw7         | NM_080428     | 6.35038e-011 | 2.10027 | E15.5 * Wnt1 up vs E15.5 * Ctrl |
| 10458417 | ENSMUSG000001 | ENSMUST000001 | 0.00013551   | 2.10023 | E15.5 * Wnt1 up vs E15.5 * Ctrl |
| 10528143 | Ppp1r14b      | NM_008889     | 4.36576e-011 | 2.09988 | E15.5 * Wnt1 up vs E15.5 * Ctrl |
| 10448557 | Abca3         | NM_013855     | 7.21232e-006 | 2.09881 | E15.5 * Wnt1 up vs E15.5 * Ctrl |
| 10590306 | Entpd3        | NM_178676     | 1.97515e-007 | 2.09613 | E15.5 * Wnt1 up vs E15.5 * Ctrl |

|                        |              |              |         |                                 |
|------------------------|--------------|--------------|---------|---------------------------------|
| 10601701 Tmem35        | NM_026239    | 2.84169e-007 | 2.09324 | E15.5 * Wnt1 up vs E15.5 * Ctrl |
| 10469767 Nxph2         | NM_008752    | 5.8785e-006  | 2.09281 | E15.5 * Wnt1 up vs E15.5 * Ctrl |
| 10450622 2610110G12Rik | NM_001142744 | 7.39723e-006 | 2.09093 | E15.5 * Wnt1 up vs E15.5 * Ctrl |
| 10544462 Fam115a       | NM_029930    | 3.43536e-008 | 2.08933 | E15.5 * Wnt1 up vs E15.5 * Ctrl |
| 10528038 Adam22        | NM_001007220 | 1.57234e-008 | 2.0893  | E15.5 * Wnt1 up vs E15.5 * Ctrl |
| 10384838 C230094A16Rik | NM_146016    | 3.84676e-007 | 2.08901 | E15.5 * Wnt1 up vs E15.5 * Ctrl |
| 10457834               | ---          | 6.40865e-006 | 2.08868 | E15.5 * Wnt1 up vs E15.5 * Ctrl |
| 10597309 Stac          | NM_016853    | 3.98715e-007 | 2.08756 | E15.5 * Wnt1 up vs E15.5 * Ctrl |
| 10368577 Rnf217        | NM_001146349 | 2.97042e-007 | 2.08752 | E15.5 * Wnt1 up vs E15.5 * Ctrl |
| 10449258 Arhgdig       | NM_008113    | 7.36061e-007 | 2.08468 | E15.5 * Wnt1 up vs E15.5 * Ctrl |
| 10589685 Lrrc2         | NM_028838    | 2.15099e-006 | 2.08406 | E15.5 * Wnt1 up vs E15.5 * Ctrl |
| 10564262 Mkrr3         | NM_011746    | 2.20375e-005 | 2.081   | E15.5 * Wnt1 up vs E15.5 * Ctrl |
| 10366712 Ppm1h         | NM_001110218 | 1.98922e-008 | 2.07891 | E15.5 * Wnt1 up vs E15.5 * Ctrl |
| 10419578 Ndrp2         | NM_013864    | 2.23137e-007 | 2.0766  | E15.5 * Wnt1 up vs E15.5 * Ctrl |
| 10423258 Cdh12         | NM_001008420 | 0.000112344  | 2.07658 | E15.5 * Wnt1 up vs E15.5 * Ctrl |
| 10577586 Ap3m2         | NM_001122820 | 1.65853e-008 | 2.07638 | E15.5 * Wnt1 up vs E15.5 * Ctrl |
| 10431872 Slc38a1       | ENSMUST00000 | 4.44075e-009 | 2.07488 | E15.5 * Wnt1 up vs E15.5 * Ctrl |
| 10438069 Ypel1         | NM_023249    | 3.32045e-008 | 2.07463 | E15.5 * Wnt1 up vs E15.5 * Ctrl |
| 10376096 Acsi6         | NM_001033598 | 3.98922e-010 | 2.07295 | E15.5 * Wnt1 up vs E15.5 * Ctrl |
| 10428443 Kcnv1         | NM_026200    | 3.65702e-006 | 2.0683  | E15.5 * Wnt1 up vs E15.5 * Ctrl |
| 10495285 Sort1         | NM_019972    | 4.06561e-010 | 2.06585 | E15.5 * Wnt1 up vs E15.5 * Ctrl |
| 10567725 Zkscan2       | NM_001081329 | 1.26628e-007 | 2.06448 | E15.5 * Wnt1 up vs E15.5 * Ctrl |
| 10543120 lca1          | NM_010492    | 4.01236e-007 | 2.06264 | E15.5 * Wnt1 up vs E15.5 * Ctrl |
| 10373542 Dgka          | NM_016811    | 8.30111e-009 | 2.06245 | E15.5 * Wnt1 up vs E15.5 * Ctrl |
| 10438017 Fgd4          | NM_139232    | 2.62781e-007 | 2.06176 | E15.5 * Wnt1 up vs E15.5 * Ctrl |
| 10565102 Ap3b2         | NM_021492    | 1.62484e-007 | 2.06066 | E15.5 * Wnt1 up vs E15.5 * Ctrl |
| 10395466 Dock4         | NM_172803    | 4.89174e-009 | 2.06014 | E15.5 * Wnt1 up vs E15.5 * Ctrl |
| 10362490 Tspyl4        | NM_030203    | 7.60677e-008 | 2.05792 | E15.5 * Wnt1 up vs E15.5 * Ctrl |
| 10430519 Csnk1e        | NM_013767    | 1.3053e-007  | 2.05547 | E15.5 * Wnt1 up vs E15.5 * Ctrl |
| 10485582 Tcpl1l1       | NM_177190    | 3.75969e-007 | 2.05417 | E15.5 * Wnt1 up vs E15.5 * Ctrl |
| 10363415 Spock2        | NM_052994    | 5.15903e-007 | 2.05317 | E15.5 * Wnt1 up vs E15.5 * Ctrl |
| 10512315 Ccl27a        | NM_001048179 | 3.40883e-007 | 2.0529  | E15.5 * Wnt1 up vs E15.5 * Ctrl |
| 10556509 Spon1         | NM_145584    | 5.12083e-009 | 2.05094 | E15.5 * Wnt1 up vs E15.5 * Ctrl |
| 10476592 Macrod2       | NM_001013802 | 6.59079e-005 | 2.05052 | E15.5 * Wnt1 up vs E15.5 * Ctrl |
| 10394158 Kif3c         | NM_008445    | 1.5318e-007  | 2.04984 | E15.5 * Wnt1 up vs E15.5 * Ctrl |
| 10553635 Nipa1         | NM_153578    | 1.27135e-007 | 2.04886 | E15.5 * Wnt1 up vs E15.5 * Ctrl |
| 10402318 Prima1        | NM_133364    | 1.11604e-005 | 2.0481  | E15.5 * Wnt1 up vs E15.5 * Ctrl |
| 10564272 Chrna7        | NM_007390    | 1.25835e-007 | 2.0477  | E15.5 * Wnt1 up vs E15.5 * Ctrl |
| 10503593 6230409E13Rik | NM_175234    | 1.50852e-008 | 2.04759 | E15.5 * Wnt1 up vs E15.5 * Ctrl |
| 10423471 Ctnnd2        | NM_008729    | 1.52668e-007 | 2.04699 | E15.5 * Wnt1 up vs E15.5 * Ctrl |
| 10482181 Strbp         | NM_009261    | 1.28803e-011 | 2.04692 | E15.5 * Wnt1 up vs E15.5 * Ctrl |
| 10395971               | ---          | 0.000225074  | 2.04649 | E15.5 * Wnt1 up vs E15.5 * Ctrl |
| 10371466 Syn3          | NM_013722    | 3.38494e-006 | 2.0464  | E15.5 * Wnt1 up vs E15.5 * Ctrl |
| 10593497 Zc3h12c       | ENSMUST00000 | 1.44229e-006 | 2.04011 | E15.5 * Wnt1 up vs E15.5 * Ctrl |
| 10358191 Camsap1l1     | NM_001081360 | 1.03928e-011 | 2.03854 | E15.5 * Wnt1 up vs E15.5 * Ctrl |
| 10480381 Arhgap21      | NM_001128084 | 1.78073e-012 | 2.03717 | E15.5 * Wnt1 up vs E15.5 * Ctrl |
| 10373950 Nipsnap1      | NM_008698    | 4.3676e-009  | 2.03321 | E15.5 * Wnt1 up vs E15.5 * Ctrl |
| 10406941 Sgtb          | NM_144838    | 2.00785e-005 | 2.03252 | E15.5 * Wnt1 up vs E15.5 * Ctrl |
| 10488033 Pak7          | NM_172858    | 1.72832e-009 | 2.03061 | E15.5 * Wnt1 up vs E15.5 * Ctrl |
| 10571860 Hand2         | NM_010402    | 3.29079e-008 | 2.02914 | E15.5 * Wnt1 up vs E15.5 * Ctrl |
| 10548745 Gpr19         | NM_008157    | 2.599e-007   | 2.02809 | E15.5 * Wnt1 up vs E15.5 * Ctrl |
| 10419414               | ---          | 0.00132809   | 2.02754 | E15.5 * Wnt1 up vs E15.5 * Ctrl |
| 10548051 Kcna6         | NM_013568    | 1.38051e-006 | 2.02731 | E15.5 * Wnt1 up vs E15.5 * Ctrl |
| 10411782 Pik3r1        | NM_001077495 | 9.52161e-009 | 2.02672 | E15.5 * Wnt1 up vs E15.5 * Ctrl |
| 10546685 Eif4e3        | NM_025829    | 3.10139e-009 | 2.02491 | E15.5 * Wnt1 up vs E15.5 * Ctrl |
| 10418053 Kcnma1        | NM_010610    | 1.31331e-007 | 2.0236  | E15.5 * Wnt1 up vs E15.5 * Ctrl |
| 10555027 Gab2          | NM_010248    | 3.86823e-009 | 2.02104 | E15.5 * Wnt1 up vs E15.5 * Ctrl |
| 10399470 Trib2         | NM_144551    | 1.45844e-008 | 2.01868 | E15.5 * Wnt1 up vs E15.5 * Ctrl |
| 10504164 Ccl27a        | NM_011336    | 2.99228e-006 | 2.01778 | E15.5 * Wnt1 up vs E15.5 * Ctrl |
| 10504194 Ccl27a        | NM_011336    | 2.99228e-006 | 2.01778 | E15.5 * Wnt1 up vs E15.5 * Ctrl |
| 10583992 Igsf9b        | NM_001129787 | 3.47072e-009 | 2.01675 | E15.5 * Wnt1 up vs E15.5 * Ctrl |
| 10445338 Enpp5         | NM_032003    | 1.02839e-006 | 2.01659 | E15.5 * Wnt1 up vs E15.5 * Ctrl |
| 10413416 Il17rd        | NM_134437    | 2.21309e-007 | 2.01592 | E15.5 * Wnt1 up vs E15.5 * Ctrl |
| 10398996 Crip2         | NM_024223    | 2.00441e-005 | 2.01556 | E15.5 * Wnt1 up vs E15.5 * Ctrl |
| 10447294 Prkce         | NM_011104    | 2.2036e-008  | 2.01338 | E15.5 * Wnt1 up vs E15.5 * Ctrl |
| 10607888 Frmpd4        | NM_001033330 | 3.82787e-007 | 2.01251 | E15.5 * Wnt1 up vs E15.5 * Ctrl |

|          |               |               |              |         |                                 |
|----------|---------------|---------------|--------------|---------|---------------------------------|
| 10489985 | Atp9a         | NM_015731     | 3.8889e-006  | 2.00841 | E15.5 * Wnt1 up vs E15.5 * Ctrl |
| 10499045 | Trim2         | NM_030706     | 2.08617e-009 | 2.00748 | E15.5 * Wnt1 up vs E15.5 * Ctrl |
| 10380648 | Hoxb4         | NM_010459     | 2.94347e-008 | 2.00679 | E15.5 * Wnt1 up vs E15.5 * Ctrl |
| 10357472 | Cxcr4         | NM_009911     | 1.26871e-005 | 2.00607 | E15.5 * Wnt1 up vs E15.5 * Ctrl |
| 10512847 | Alg2          | NM_019998     | 7.21992e-008 | 2.00493 | E15.5 * Wnt1 up vs E15.5 * Ctrl |
| 10603598 | Rpgr          | NM_011285     | 4.34856e-006 | 2.00467 | E15.5 * Wnt1 up vs E15.5 * Ctrl |
| 10507798 | Mycl1         | NM_008506     | 5.41235e-007 | 2.00239 | E15.5 * Wnt1 up vs E15.5 * Ctrl |
| 10455019 | Pcdha10       | NM_009961     | 1.63669e-009 | 2.00191 | E15.5 * Wnt1 up vs E15.5 * Ctrl |
| 10416175 | Nefl          | NM_010910     | 2.06367e-013 | 10.3348 | E15.5 * Wnt1 up vs E15.5 * Ctrl |
| 10488617 | Nrsn2         | NM_001009948  | 4.72542e-006 | 1.99882 | E15.5 * Wnt1 up vs E15.5 * Ctrl |
| 10492522 | Schip1        | NM_001113421  | 3.4736e-008  | 1.99721 | E15.5 * Wnt1 up vs E15.5 * Ctrl |
| 10470834 | Spna2         | NM_001076554  | 1.14854e-008 | 1.99713 | E15.5 * Wnt1 up vs E15.5 * Ctrl |
| 10506714 | Lrp8          | NM_053073     | 1.89975e-007 | 1.99329 | E15.5 * Wnt1 up vs E15.5 * Ctrl |
| 10556598 | Xylt1         | NM_175645     | 9.046e-006   | 1.99316 | E15.5 * Wnt1 up vs E15.5 * Ctrl |
| 10526853 | Fam20c        | NM_030565     | 7.19615e-006 | 1.99208 | E15.5 * Wnt1 up vs E15.5 * Ctrl |
| 10396314 | Lrrc9         | NM_001142728  | 1.01246e-006 | 1.99047 | E15.5 * Wnt1 up vs E15.5 * Ctrl |
| 10360972 | Kcnk2         | NM_010607     | 2.74448e-007 | 1.98778 | E15.5 * Wnt1 up vs E15.5 * Ctrl |
| 10477986 | Nnat          | NM_010923     | 3.88782e-006 | 1.98745 | E15.5 * Wnt1 up vs E15.5 * Ctrl |
| 10364769 | Apc2          | NM_011789     | 3.53688e-006 | 1.98592 | E15.5 * Wnt1 up vs E15.5 * Ctrl |
| 10571384 | Efha2         | ENSMUST000001 | 6.00312e-007 | 1.98533 | E15.5 * Wnt1 up vs E15.5 * Ctrl |
| 10461022 | Ppp1r14b      | NM_008889     | 1.45755e-011 | 1.98284 | E15.5 * Wnt1 up vs E15.5 * Ctrl |
| 10484941 | Madd          | NM_145527     | 2.57324e-010 | 1.98244 | E15.5 * Wnt1 up vs E15.5 * Ctrl |
| 10513544 | Zfp37         | NM_009554     | 1.03158e-007 | 1.98185 | E15.5 * Wnt1 up vs E15.5 * Ctrl |
| 10532680 | Sgsm1         | NM_172718     | 1.22333e-005 | 1.9811  | E15.5 * Wnt1 up vs E15.5 * Ctrl |
| 10352178 | Sccpdh        | NM_178653     | 1.69253e-008 | 1.98097 | E15.5 * Wnt1 up vs E15.5 * Ctrl |
| 10381934 | Tanc2         | NM_181071     | 6.89251e-006 | 1.98056 | E15.5 * Wnt1 up vs E15.5 * Ctrl |
| 10365471 | Fbxo7         | NM_153195     | 2.79687e-009 | 1.97755 | E15.5 * Wnt1 up vs E15.5 * Ctrl |
| 10374406 | Cnrip1        | NM_029861     | 6.97719e-008 | 1.97636 | E15.5 * Wnt1 up vs E15.5 * Ctrl |
| 10371332 | Aldh1l2       | NM_153543     | 3.04401e-007 | 1.97621 | E15.5 * Wnt1 up vs E15.5 * Ctrl |
| 10381187 | Atp6v0a1      | NM_016920     | 6.08034e-009 | 1.97298 | E15.5 * Wnt1 up vs E15.5 * Ctrl |
| 10561369 | BC089491      | NM_175033     | 3.81185e-007 | 1.97155 | E15.5 * Wnt1 up vs E15.5 * Ctrl |
| 10469613 | Thnsl1        | NM_177588     | 1.74718e-007 | 1.97086 | E15.5 * Wnt1 up vs E15.5 * Ctrl |
| 10456161 | Htr4          | NM_008313     | 3.55864e-008 | 1.97065 | E15.5 * Wnt1 up vs E15.5 * Ctrl |
| 10490559 | Chrna4        | NM_015730     | 1.76728e-005 | 1.96944 | E15.5 * Wnt1 up vs E15.5 * Ctrl |
| 10473058 | Osbpl6        | NM_145525     | 1.59728e-007 | 1.96869 | E15.5 * Wnt1 up vs E15.5 * Ctrl |
| 10441497 | Tulp4         | NM_054040     | 1.76091e-005 | 1.96747 | E15.5 * Wnt1 up vs E15.5 * Ctrl |
| 10579165 | Ncan          | NM_007789     | 4.54367e-007 | 1.96654 | E15.5 * Wnt1 up vs E15.5 * Ctrl |
| 10454655 | Apc           | NM_007462     | 3.35622e-009 | 1.96409 | E15.5 * Wnt1 up vs E15.5 * Ctrl |
| 10417713 | Rarb          | NM_011243     | 1.2103e-007  | 1.96344 | E15.5 * Wnt1 up vs E15.5 * Ctrl |
| 10451167 | Tmem63b       | NM_198167     | 7.64491e-007 | 1.96201 | E15.5 * Wnt1 up vs E15.5 * Ctrl |
| 10550915 | Cadm4         | NM_153112     | 2.30987e-005 | 1.95975 | E15.5 * Wnt1 up vs E15.5 * Ctrl |
| 10496192 | Tacr3         | NM_021382     | 2.32596e-005 | 1.95926 | E15.5 * Wnt1 up vs E15.5 * Ctrl |
| 10470027 | Npdc1         | NM_008721     | 1.07194e-006 | 1.95894 | E15.5 * Wnt1 up vs E15.5 * Ctrl |
| 10434165 | Arvcf         | NM_033474     | 2.37861e-007 | 1.95808 | E15.5 * Wnt1 up vs E15.5 * Ctrl |
| 10367803 | ---           | ---           | 0.000417977  | 1.95728 | E15.5 * Wnt1 up vs E15.5 * Ctrl |
| 10476314 | Prnp          | NM_011170     | 1.18819e-008 | 1.95719 | E15.5 * Wnt1 up vs E15.5 * Ctrl |
| 10379482 | Cdk5r1        | NM_009871     | 1.94635e-008 | 1.957   | E15.5 * Wnt1 up vs E15.5 * Ctrl |
| 10446777 | Ehd3          | NM_020578     | 2.23521e-006 | 1.95395 | E15.5 * Wnt1 up vs E15.5 * Ctrl |
| 10375265 | Atp10b        | NM_176999     | 7.24012e-007 | 1.95318 | E15.5 * Wnt1 up vs E15.5 * Ctrl |
| 10456254 | Nedd4l        | NM_001114386  | 9.41493e-008 | 1.9496  | E15.5 * Wnt1 up vs E15.5 * Ctrl |
| 10458913 | Cep120        | NM_178686     | 1.53608e-008 | 1.94896 | E15.5 * Wnt1 up vs E15.5 * Ctrl |
| 10388160 | Slc13a5       | NM_001004148  | 1.10497e-007 | 1.94804 | E15.5 * Wnt1 up vs E15.5 * Ctrl |
| 10392347 | Pitpnc1       | NM_145823     | 8.76864e-010 | 1.94787 | E15.5 * Wnt1 up vs E15.5 * Ctrl |
| 10499091 | Dear1         | NM_001040461  | 4.32584e-006 | 1.94743 | E15.5 * Wnt1 up vs E15.5 * Ctrl |
| 10578300 | Mttr7         | NM_001040699  | 1.94871e-007 | 1.94713 | E15.5 * Wnt1 up vs E15.5 * Ctrl |
| 10415187 | Lrrc16b       | NM_001024645  | 9.84557e-007 | 1.94587 | E15.5 * Wnt1 up vs E15.5 * Ctrl |
| 10457895 | Brunol4       | NM_001146292  | 6.28729e-007 | 1.94317 | E15.5 * Wnt1 up vs E15.5 * Ctrl |
| 10564111 | ---           | ---           | 3.80209e-008 | 1.94046 | E15.5 * Wnt1 up vs E15.5 * Ctrl |
| 10593421 | 1110032A03Rik | NM_023483     | 0.000413034  | 1.93861 | E15.5 * Wnt1 up vs E15.5 * Ctrl |
| 10534168 | Auts2         | NM_177047     | 1.5969e-009  | 1.93753 | E15.5 * Wnt1 up vs E15.5 * Ctrl |
| 10601834 | Gprasp1       | NM_026081     | 1.18362e-005 | 1.93726 | E15.5 * Wnt1 up vs E15.5 * Ctrl |
| 10409222 | Shc3          | NM_009167     | 2.76543e-007 | 1.93583 | E15.5 * Wnt1 up vs E15.5 * Ctrl |
| 10477944 | ---           | ---           | 0.000457258  | 1.93382 | E15.5 * Wnt1 up vs E15.5 * Ctrl |
| 10351269 | 4930455F23Rik | NM_029115     | 1.608e-007   | 1.93359 | E15.5 * Wnt1 up vs E15.5 * Ctrl |
| 10572727 | OTTMUSG00000  | BC080687      | 4.25572e-005 | 1.93336 | E15.5 * Wnt1 up vs E15.5 * Ctrl |
| 10538082 | Atp6v0e2      | NM_133764     | 6.39177e-007 | 1.93249 | E15.5 * Wnt1 up vs E15.5 * Ctrl |

|                        |              |              |         |                                 |
|------------------------|--------------|--------------|---------|---------------------------------|
| 10576062 Jph3          | NM_020605    | 3.61597e-007 | 1.9305  | E15.5 * Wnt1 up vs E15.5 * Ctrl |
| 10491885 Pcdh10        | NM_001098171 | 7.1591e-006  | 1.92969 | E15.5 * Wnt1 up vs E15.5 * Ctrl |
| 10490802 Fam164a       | NM_173181    | 0.000129185  | 1.92916 | E15.5 * Wnt1 up vs E15.5 * Ctrl |
| 10549162 St8sia1       | NM_011374    | 1.0902e-006  | 1.92866 | E15.5 * Wnt1 up vs E15.5 * Ctrl |
| 10431697 Abcd2         | NM_011994    | 0.000100537  | 1.92731 | E15.5 * Wnt1 up vs E15.5 * Ctrl |
| 10397882 Chga          | NM_007693    | 1.55866e-006 | 1.92529 | E15.5 * Wnt1 up vs E15.5 * Ctrl |
| 10483624 Dlx1as        | NR_002854    | 9.66002e-006 | 1.92082 | E15.5 * Wnt1 up vs E15.5 * Ctrl |
| 10588037 Rbp1          | NM_011254    | 7.731e-009   | 1.92075 | E15.5 * Wnt1 up vs E15.5 * Ctrl |
| 10386636 Usp22         | NM_001004143 | 1.07645e-009 | 1.92047 | E15.5 * Wnt1 up vs E15.5 * Ctrl |
| 10422628 Plcxd3        | NM_177355    | 1.68245e-007 | 1.91799 | E15.5 * Wnt1 up vs E15.5 * Ctrl |
| 10536353 Dlx6          | NM_010057    | 1.24717e-005 | 1.91698 | E15.5 * Wnt1 up vs E15.5 * Ctrl |
| 10400023 Tspan13       | NM_025359    | 5.32747e-008 | 1.91636 | E15.5 * Wnt1 up vs E15.5 * Ctrl |
| 10564209               | ---          | 4.07536e-005 | 1.91514 | E15.5 * Wnt1 up vs E15.5 * Ctrl |
| 10434302 Kihl24        | NM_029436    | 1.23252e-008 | 1.91431 | E15.5 * Wnt1 up vs E15.5 * Ctrl |
| 10409616 Spock1        | NM_009262    | 8.85717e-008 | 1.91365 | E15.5 * Wnt1 up vs E15.5 * Ctrl |
| 10593384 Dixdc1        | NM_178118    | 1.94085e-009 | 1.91265 | E15.5 * Wnt1 up vs E15.5 * Ctrl |
| 10452935 Heatr5b       | BC019508     | 4.0431e-005  | 1.91212 | E15.5 * Wnt1 up vs E15.5 * Ctrl |
| 10538753 Atoh1         | BC010820     | 2.34636e-005 | 1.91101 | E15.5 * Wnt1 up vs E15.5 * Ctrl |
| 10495781 Bcar3         | NM_013867    | 5.30418e-005 | 1.91033 | E15.5 * Wnt1 up vs E15.5 * Ctrl |
| 10468275 Pcgf6         | NM_027654    | 2.24939e-009 | 1.91023 | E15.5 * Wnt1 up vs E15.5 * Ctrl |
| 10541968 Ano2          | NM_153589    | 7.11497e-008 | 1.90913 | E15.5 * Wnt1 up vs E15.5 * Ctrl |
| 10428857 Mtss1         | NM_001146180 | 4.81758e-008 | 1.90873 | E15.5 * Wnt1 up vs E15.5 * Ctrl |
| 10525195 AU042671      | ENSMUST00000 | 5.23025e-006 | 1.90551 | E15.5 * Wnt1 up vs E15.5 * Ctrl |
| 10549899 Zfp418        | NM_146179    | 0.000506679  | 1.9052  | E15.5 * Wnt1 up vs E15.5 * Ctrl |
| 10473349 Ypel4         | NM_001005342 | 3.46321e-006 | 1.90491 | E15.5 * Wnt1 up vs E15.5 * Ctrl |
| 10355141 Klf7          | NM_033563    | 1.98074e-009 | 1.90476 | E15.5 * Wnt1 up vs E15.5 * Ctrl |
| 10552929 Lin7b         | NM_011698    | 2.87013e-005 | 1.90331 | E15.5 * Wnt1 up vs E15.5 * Ctrl |
| 10431113 Sult4a1       | NM_013873    | 1.46855e-006 | 1.90018 | E15.5 * Wnt1 up vs E15.5 * Ctrl |
| 10532538 Asphd2        | NM_028386    | 1.02143e-006 | 1.9001  | E15.5 * Wnt1 up vs E15.5 * Ctrl |
| 10476443 Plcb4         | NM_013829    | 7.08012e-008 | 1.89873 | E15.5 * Wnt1 up vs E15.5 * Ctrl |
| 10600419 Plxna3        | NM_008883    | 9.9973e-007  | 1.89736 | E15.5 * Wnt1 up vs E15.5 * Ctrl |
| 10490129 Bmp7          | NM_007557    | 1.77381e-006 | 1.8948  | E15.5 * Wnt1 up vs E15.5 * Ctrl |
| 10455118 Pcdhb18       | NM_053143    | 4.57934e-006 | 1.89381 | E15.5 * Wnt1 up vs E15.5 * Ctrl |
| 10518484 Fbxo44        | NM_173401    | 7.35571e-007 | 1.89353 | E15.5 * Wnt1 up vs E15.5 * Ctrl |
| 10446594               | ---          | 1.64809e-006 | 1.89237 | E15.5 * Wnt1 up vs E15.5 * Ctrl |
| 10436978 Cbr3          | NM_173047    | 0.000956448  | 1.89204 | E15.5 * Wnt1 up vs E15.5 * Ctrl |
| 10532052 Hfm1          | ENSMUST00000 | 2.27544e-005 | 1.89198 | E15.5 * Wnt1 up vs E15.5 * Ctrl |
| 10394593 Fam49a        | NM_029758    | 8.12539e-006 | 1.89175 | E15.5 * Wnt1 up vs E15.5 * Ctrl |
| 10571865 Scrg1         | NM_009136    | 8.3158e-005  | 1.88931 | E15.5 * Wnt1 up vs E15.5 * Ctrl |
| 10578957               | ---          | 6.87913e-005 | 1.88883 | E15.5 * Wnt1 up vs E15.5 * Ctrl |
| 10377431 Vamp2         | NM_009497    | 1.32707e-007 | 1.88783 | E15.5 * Wnt1 up vs E15.5 * Ctrl |
| 10542522 Plekha5       | NM_144920    | 3.03032e-008 | 1.88587 | E15.5 * Wnt1 up vs E15.5 * Ctrl |
| 10551401 Ttc9b         | NM_028417    | 8.32319e-007 | 1.88531 | E15.5 * Wnt1 up vs E15.5 * Ctrl |
| 10409330 4833439L19Rik | BC033445     | 8.01933e-005 | 1.88101 | E15.5 * Wnt1 up vs E15.5 * Ctrl |
| 10413726 Tnncl         | NM_009393    | 0.000636177  | 1.88099 | E15.5 * Wnt1 up vs E15.5 * Ctrl |
| 10584500 Olfr963       | NM_001011827 | 0.000184947  | 1.8805  | E15.5 * Wnt1 up vs E15.5 * Ctrl |
| 10550400 Pnmal2        | NM_001099636 | 1.76424e-006 | 1.87922 | E15.5 * Wnt1 up vs E15.5 * Ctrl |
| 10389617 Ppm1e         | NM_177167    | 7.47978e-007 | 1.87911 | E15.5 * Wnt1 up vs E15.5 * Ctrl |
| 10460118 Socs3         | NM_018821    | 2.46225e-006 | 1.87909 | E15.5 * Wnt1 up vs E15.5 * Ctrl |
| 10435676 Gsk3b         | NM_019827    | 5.62056e-010 | 1.87881 | E15.5 * Wnt1 up vs E15.5 * Ctrl |
| 10504891 Tmeff1        | NM_021436    | 2.53121e-009 | 1.87581 | E15.5 * Wnt1 up vs E15.5 * Ctrl |
| 10399121 Ptprn2        | NM_011215    | 2.6388e-008  | 1.875   | E15.5 * Wnt1 up vs E15.5 * Ctrl |
| 10470564 Ralgds        | NM_001145835 | 1.16557e-005 | 1.8746  | E15.5 * Wnt1 up vs E15.5 * Ctrl |
| 10520544 Mapre3        | NM_133350    | 2.38559e-005 | 1.87242 | E15.5 * Wnt1 up vs E15.5 * Ctrl |
| 10357363 E030049G20Rik | NM_001081756 | 0.0002472    | 1.87181 | E15.5 * Wnt1 up vs E15.5 * Ctrl |
| 10578623 Wwc2          | NM_133791    | 1.92107e-009 | 1.87009 | E15.5 * Wnt1 up vs E15.5 * Ctrl |
| 10588380 Cpne4         | NM_028719    | 3.77045e-007 | 1.86971 | E15.5 * Wnt1 up vs E15.5 * Ctrl |
| 10574384 Ndrgr4        | NM_145602    | 3.21542e-007 | 1.86961 | E15.5 * Wnt1 up vs E15.5 * Ctrl |
| 10596931 Wdr6          | NM_031392    | 2.49401e-007 | 1.8694  | E15.5 * Wnt1 up vs E15.5 * Ctrl |
| 10563905               | ---          | 3.68401e-010 | 1.86758 | E15.5 * Wnt1 up vs E15.5 * Ctrl |
| 10563907               | ---          | 3.68401e-010 | 1.86758 | E15.5 * Wnt1 up vs E15.5 * Ctrl |
| 10457888 5730494M16Rik | NM_001004361 | 2.69392e-011 | 1.86739 | E15.5 * Wnt1 up vs E15.5 * Ctrl |
| 10588592 Cacna2d2      | NM_020263    | 3.71325e-008 | 1.86584 | E15.5 * Wnt1 up vs E15.5 * Ctrl |
| 10504068 1700066J24Rik | ENSMUST00000 | 0.000101428  | 1.86571 | E15.5 * Wnt1 up vs E15.5 * Ctrl |
| 10422585 Fgf14         | NM_207667    | 2.72746e-005 | 1.86539 | E15.5 * Wnt1 up vs E15.5 * Ctrl |
| 10443690 Glp1r         | NM_021332    | 6.23606e-005 | 1.86453 | E15.5 * Wnt1 up vs E15.5 * Ctrl |

|                        |                  |              |         |                                 |
|------------------------|------------------|--------------|---------|---------------------------------|
| 10469951 Rnf208        | NM_176834        | 1.21744e-007 | 1.86346 | E15.5 * Wnt1 up vs E15.5 * Ctrl |
| 10476326 Cds2          | NM_138651        | 7.90863e-007 | 1.86279 | E15.5 * Wnt1 up vs E15.5 * Ctrl |
| 10592535 Sorl1         | NM_011436        | 6.47443e-009 | 1.85982 | E15.5 * Wnt1 up vs E15.5 * Ctrl |
| 10371396 Mterfd3       | NM_028832        | 0.000131265  | 1.85874 | E15.5 * Wnt1 up vs E15.5 * Ctrl |
| 10458940 Zfp608        | NM_175751        | 8.83205e-010 | 1.85836 | E15.5 * Wnt1 up vs E15.5 * Ctrl |
| 10362794 Ppil6         | NM_028430        | 0.000368136  | 1.85768 | E15.5 * Wnt1 up vs E15.5 * Ctrl |
| 10404356 OTTMUSG00000  | XM_909282        | 0.00337601   | 1.85602 | E15.5 * Wnt1 up vs E15.5 * Ctrl |
| 10431874 Slc38a1       | NM_134086        | 1.26176e-008 | 1.85337 | E15.5 * Wnt1 up vs E15.5 * Ctrl |
| 10563685 Ptpn5         | NM_013643        | 6.14588e-006 | 1.85254 | E15.5 * Wnt1 up vs E15.5 * Ctrl |
| 10563945               | ---              | 1.01468e-006 | 1.85177 | E15.5 * Wnt1 up vs E15.5 * Ctrl |
| 10505998 Fggy          | NM_001113412     | 0.00182033   | 1.85141 | E15.5 * Wnt1 up vs E15.5 * Ctrl |
| 10368585 Nkain2        | NM_001013411     | 1.09197e-005 | 1.85135 | E15.5 * Wnt1 up vs E15.5 * Ctrl |
| 10513004 ENSMUSG00000  | ENSMUST00000     | 0.00499165   | 1.85047 | E15.5 * Wnt1 up vs E15.5 * Ctrl |
| 10501483 Ntng1         | ENSMUST00000     | 3.3456e-007  | 1.85026 | E15.5 * Wnt1 up vs E15.5 * Ctrl |
| 10528546 Gabarapl2     | NM_026693        | 1.67541e-007 | 1.85013 | E15.5 * Wnt1 up vs E15.5 * Ctrl |
| 10492590 Ppm1l         | NM_178726        | 3.14817e-006 | 1.84942 | E15.5 * Wnt1 up vs E15.5 * Ctrl |
| 10598164 0610010K06Rik | NM_027861        | 0.000408135  | 1.84881 | E15.5 * Wnt1 up vs E15.5 * Ctrl |
| 10416956               | ---              | 0.00102519   | 1.84837 | E15.5 * Wnt1 up vs E15.5 * Ctrl |
| 10572485 Rab3a         | NM_009001        | 8.7336e-008  | 1.84833 | E15.5 * Wnt1 up vs E15.5 * Ctrl |
| 10444332 BC051142      | NM_001001177     | 0.000208687  | 1.84526 | E15.5 * Wnt1 up vs E15.5 * Ctrl |
| 10480676 Grin1         | NM_008169        | 1.28395e-009 | 1.8434  | E15.5 * Wnt1 up vs E15.5 * Ctrl |
| 10395142 Sh3yl1        | NM_013709        | 8.36957e-008 | 1.84267 | E15.5 * Wnt1 up vs E15.5 * Ctrl |
| 10576946 Lig4          | NM_176953        | 0.000206967  | 1.84107 | E15.5 * Wnt1 up vs E15.5 * Ctrl |
| 10430574 4933432B09Rik | BC118956         | 2.14599e-007 | 1.84105 | E15.5 * Wnt1 up vs E15.5 * Ctrl |
| 10462039 Trpm3         | NM_001035244     | 1.144e-009   | 1.84034 | E15.5 * Wnt1 up vs E15.5 * Ctrl |
| 10588091 Cep70         | NM_023873        | 0.000170833  | 1.83956 | E15.5 * Wnt1 up vs E15.5 * Ctrl |
| 10571922 Nek1          | NM_175089        | 3.25702e-006 | 1.83928 | E15.5 * Wnt1 up vs E15.5 * Ctrl |
| 10417798 Kcnk5         | NM_021542        | 4.90857e-005 | 1.83818 | E15.5 * Wnt1 up vs E15.5 * Ctrl |
| 10511665 Necab1        | NM_178617        | 3.84037e-005 | 1.8378  | E15.5 * Wnt1 up vs E15.5 * Ctrl |
| 10549171 5730419I09Rik | NM_029081        | 1.48563e-007 | 1.83748 | E15.5 * Wnt1 up vs E15.5 * Ctrl |
| 10594513               | ---              | 0.000421318  | 1.83725 | E15.5 * Wnt1 up vs E15.5 * Ctrl |
| 10571312 Dusp4         | NM_176933        | 3.96282e-005 | 1.83687 | E15.5 * Wnt1 up vs E15.5 * Ctrl |
| 10457733 B4galt6       | NM_019737        | 1.78431e-007 | 1.83623 | E15.5 * Wnt1 up vs E15.5 * Ctrl |
| 10532180 Cplx1         | NM_007756        | 2.088e-006   | 1.83607 | E15.5 * Wnt1 up vs E15.5 * Ctrl |
| 10576854 Ctxn1         | NM_183315        | 9.62128e-007 | 1.83577 | E15.5 * Wnt1 up vs E15.5 * Ctrl |
| 10521471 Ppp2r2c       | NM_172994        | 0.000222542  | 1.83567 | E15.5 * Wnt1 up vs E15.5 * Ctrl |
| 10414278 Gpr137c       | NM_027518        | 9.06043e-007 | 1.83553 | E15.5 * Wnt1 up vs E15.5 * Ctrl |
| 10578709 Wdr17         | NM_028220        | 2.75333e-006 | 1.83388 | E15.5 * Wnt1 up vs E15.5 * Ctrl |
| 10536931 Ahcyl2        | NM_021414        | 6.70296e-006 | 1.83333 | E15.5 * Wnt1 up vs E15.5 * Ctrl |
| 10544829 Jazf1         | NM_173406        | 5.85114e-008 | 1.83262 | E15.5 * Wnt1 up vs E15.5 * Ctrl |
| 10583195 ENSMUSG00000  | ENSMUST00000     | 5.98299e-005 | 1.83223 | E15.5 * Wnt1 up vs E15.5 * Ctrl |
| 10499108 Glt28d2       | NM_177130        | 6.93533e-006 | 1.82848 | E15.5 * Wnt1 up vs E15.5 * Ctrl |
| 10491962 Foxo1         | NM_019739        | 4.27796e-008 | 1.82816 | E15.5 * Wnt1 up vs E15.5 * Ctrl |
| 10455238 Ndfip1        | NM_022996        | 7.94916e-010 | 1.82619 | E15.5 * Wnt1 up vs E15.5 * Ctrl |
| 10605067 Pnck          | NM_012040        | 2.36225e-006 | 1.82611 | E15.5 * Wnt1 up vs E15.5 * Ctrl |
| 10448247 Zfp40         | NM_009555        | 0.000136078  | 1.8261  | E15.5 * Wnt1 up vs E15.5 * Ctrl |
| 10580870 Zfp319        | ENSMUST00000     | 0.000113956  | 1.82591 | E15.5 * Wnt1 up vs E15.5 * Ctrl |
| 10459262 Ablim3        | NM_198649        | 1.49314e-006 | 1.8256  | E15.5 * Wnt1 up vs E15.5 * Ctrl |
| 10601874 Tceal3        | NM_001029978     | 6.41793e-007 | 1.82398 | E15.5 * Wnt1 up vs E15.5 * Ctrl |
| 10604057               | 06-Sep NM_019942 | 2.63098e-006 | 1.82209 | E15.5 * Wnt1 up vs E15.5 * Ctrl |
| 10400141 Zbed4         | NM_181412        | 3.67189e-005 | 1.82188 | E15.5 * Wnt1 up vs E15.5 * Ctrl |
| 10510422 Casz1         | NM_001159344     | 2.11855e-008 | 1.82072 | E15.5 * Wnt1 up vs E15.5 * Ctrl |
| 10483150 Fign          | NM_021716        | 1.45913e-005 | 1.82036 | E15.5 * Wnt1 up vs E15.5 * Ctrl |
| 10426581 Al836003      | NM_177716        | 1.12136e-005 | 1.81972 | E15.5 * Wnt1 up vs E15.5 * Ctrl |
| 10347060 Unc80         | FJ210934         | 1.19531e-006 | 1.81886 | E15.5 * Wnt1 up vs E15.5 * Ctrl |
| 10465686 Rtn3          | NM_001003934     | 4.83762e-010 | 1.81817 | E15.5 * Wnt1 up vs E15.5 * Ctrl |
| 10445078 Gabbr1        | NM_019439        | 4.02504e-007 | 1.81668 | E15.5 * Wnt1 up vs E15.5 * Ctrl |
| 10477644 Trp53inp2     | NM_178111        | 5.99064e-007 | 1.81609 | E15.5 * Wnt1 up vs E15.5 * Ctrl |
| 10467749 Crtac1        | NM_145123        | 1.30977e-008 | 1.81585 | E15.5 * Wnt1 up vs E15.5 * Ctrl |
| 10426798 Smarcd1       | NM_031842        | 3.03392e-006 | 1.8153  | E15.5 * Wnt1 up vs E15.5 * Ctrl |
| 10494388 Hist2h2be     | NM_178214        | 0.000614061  | 1.81517 | E15.5 * Wnt1 up vs E15.5 * Ctrl |
| 10363868 Fam13c        | NM_024244        | 3.48794e-008 | 1.81434 | E15.5 * Wnt1 up vs E15.5 * Ctrl |
| 10374998 Gpr75         | NM_175490        | 5.90433e-005 | 1.81392 | E15.5 * Wnt1 up vs E15.5 * Ctrl |
| 10400155 Nova1         | ENSMUST00000     | 7.0746e-005  | 1.81336 | E15.5 * Wnt1 up vs E15.5 * Ctrl |
| 10547404 Erc1          | NM_053204        | 6.99486e-005 | 1.81329 | E15.5 * Wnt1 up vs E15.5 * Ctrl |
| 10374197 Ramp3         | NM_019511        | 6.09542e-006 | 1.81314 | E15.5 * Wnt1 up vs E15.5 * Ctrl |

|          |               |               |              |         |                                 |
|----------|---------------|---------------|--------------|---------|---------------------------------|
| 10495518 | Olfr3         | NM_153157     | 2.66285e-006 | 1.81113 | E15.5 * Wnt1 up vs E15.5 * Ctrl |
| 10502419 | Rap1gds1      | NM_001040690  | 1.02049e-007 | 1.81091 | E15.5 * Wnt1 up vs E15.5 * Ctrl |
| 10436594 |               | ---           | 0.00200006   | 1.80938 | E15.5 * Wnt1 up vs E15.5 * Ctrl |
| 10501778 | Ptbp2         | NM_019550     | 3.01276e-007 | 1.80886 | E15.5 * Wnt1 up vs E15.5 * Ctrl |
| 10379936 | Tbx2          | NM_009324     | 4.65131e-005 | 1.8073  | E15.5 * Wnt1 up vs E15.5 * Ctrl |
| 10379795 | Ap1gbp1       | NM_001115009  | 1.40569e-007 | 1.80718 | E15.5 * Wnt1 up vs E15.5 * Ctrl |
| 10490838 | Fabp5         | NM_010634     | 2.853e-008   | 1.80671 | E15.5 * Wnt1 up vs E15.5 * Ctrl |
| 10415866 | Xkr6          | NM_173393     | 3.05261e-005 | 1.80627 | E15.5 * Wnt1 up vs E15.5 * Ctrl |
| 10577544 | Polb          | NM_011130     | 4.82137e-007 | 1.80557 | E15.5 * Wnt1 up vs E15.5 * Ctrl |
| 10399725 | Sox11         | NM_009234     | 1.94121e-012 | 1.80466 | E15.5 * Wnt1 up vs E15.5 * Ctrl |
| 10536068 | Zfp788        | NM_023363     | 6.71453e-005 | 1.80415 | E15.5 * Wnt1 up vs E15.5 * Ctrl |
| 10552320 | Zfp788        | NM_023363     | 6.71453e-005 | 1.80415 | E15.5 * Wnt1 up vs E15.5 * Ctrl |
| 10376444 | Hist3h2ba     | NM_030082     | 0.000137225  | 1.80284 | E15.5 * Wnt1 up vs E15.5 * Ctrl |
| 10450904 | Scoc          | NM_001039137  | 0.000423184  | 1.80264 | E15.5 * Wnt1 up vs E15.5 * Ctrl |
| 10524105 | Chfr          | NM_172717     | 2.93524e-008 | 1.8022  | E15.5 * Wnt1 up vs E15.5 * Ctrl |
| 10559681 | D430041B17Rik | NM_172737     | 2.50432e-008 | 1.80078 | E15.5 * Wnt1 up vs E15.5 * Ctrl |
| 10551852 | Clip3         | NM_001081114  | 3.35027e-005 | 1.79967 | E15.5 * Wnt1 up vs E15.5 * Ctrl |
| 10426093 | Zbed4         | NM_181412     | 2.55227e-008 | 1.7995  | E15.5 * Wnt1 up vs E15.5 * Ctrl |
| 10598138 | Spry3         | NM_001030293  | 0.000126473  | 1.79871 | E15.5 * Wnt1 up vs E15.5 * Ctrl |
| 10575291 | Zfp821        | NM_029468     | 7.74176e-006 | 1.79871 | E15.5 * Wnt1 up vs E15.5 * Ctrl |
| 10421810 | 1190002H23Rik | NM_025427     | 6.08607e-006 | 1.79824 | E15.5 * Wnt1 up vs E15.5 * Ctrl |
| 10388884 | Nlk           | NM_008702     | 9.83674e-009 | 1.79741 | E15.5 * Wnt1 up vs E15.5 * Ctrl |
| 10513884 | Tle1          | NM_011599     | 2.96888e-010 | 1.79645 | E15.5 * Wnt1 up vs E15.5 * Ctrl |
| 10381939 | Tanc2         | NM_181071     | 2.98154e-007 | 1.79626 | E15.5 * Wnt1 up vs E15.5 * Ctrl |
| 10385052 | Ranbp17       | NM_023146     | 4.16688e-008 | 1.79616 | E15.5 * Wnt1 up vs E15.5 * Ctrl |
| 10524098 | A830023I12Rik | BC007165      | 0.000266072  | 1.79357 | E15.5 * Wnt1 up vs E15.5 * Ctrl |
| 10349249 | Clasp1        | NM_001081276  | 6.43251e-008 | 1.79348 | E15.5 * Wnt1 up vs E15.5 * Ctrl |
| 10526391 | 2900083I11Rik | NM_021403     | 4.80163e-007 | 1.79329 | E15.5 * Wnt1 up vs E15.5 * Ctrl |
| 10462918 | Tmem20        | NM_175507     | 2.97768e-008 | 1.79289 | E15.5 * Wnt1 up vs E15.5 * Ctrl |
| 10360270 | Atp1a2        | NM_178405     | 3.48128e-009 | 1.79245 | E15.5 * Wnt1 up vs E15.5 * Ctrl |
| 10594183 | Senp8         | NM_027838     | 0.00183851   | 1.79241 | E15.5 * Wnt1 up vs E15.5 * Ctrl |
| 10363195 | Hsf2          | NM_008297     | 4.68036e-007 | 1.7919  | E15.5 * Wnt1 up vs E15.5 * Ctrl |
| 10369877 | Ube2d1        | NM_145420     | 2.31128e-008 | 1.79188 | E15.5 * Wnt1 up vs E15.5 * Ctrl |
| 10547719 | Clstn3        | NM_153508     | 6.66179e-007 | 1.79161 | E15.5 * Wnt1 up vs E15.5 * Ctrl |
| 10538275 | Nfe2l3        | NM_010903     | 1.32428e-007 | 1.79104 | E15.5 * Wnt1 up vs E15.5 * Ctrl |
| 10564053 | 100040985     | XM_001475615  | 8.54582e-010 | 1.78989 | E15.5 * Wnt1 up vs E15.5 * Ctrl |
| 10564055 |               | ---           | 8.54582e-010 | 1.78989 | E15.5 * Wnt1 up vs E15.5 * Ctrl |
| 10534531 | Ywhag         | NM_018871     | 1.4364e-005  | 1.78916 | E15.5 * Wnt1 up vs E15.5 * Ctrl |
| 10426924 | Slc4a8        | NM_021530     | 1.06587e-006 | 1.78787 | E15.5 * Wnt1 up vs E15.5 * Ctrl |
| 10454771 | Reep2         | NM_144865     | 5.08441e-007 | 1.78781 | E15.5 * Wnt1 up vs E15.5 * Ctrl |
| 10547575 | Iqsec3        | NM_001033354  | 1.30253e-006 | 1.78751 | E15.5 * Wnt1 up vs E15.5 * Ctrl |
| 10476814 | Insm1         | NM_016889     | 6.98235e-005 | 1.78706 | E15.5 * Wnt1 up vs E15.5 * Ctrl |
| 10563220 | Ppfia3        | NM_029741     | 1.47678e-005 | 1.78577 | E15.5 * Wnt1 up vs E15.5 * Ctrl |
| 10602704 | Klf8          | NM_173780     | 1.43478e-008 | 1.78444 | E15.5 * Wnt1 up vs E15.5 * Ctrl |
| 10571907 | Mfap3l        | NM_027756     | 2.28423e-006 | 1.78338 | E15.5 * Wnt1 up vs E15.5 * Ctrl |
| 10466972 | Ranbp6        | NM_177721     | 9.60271e-005 | 1.78254 | E15.5 * Wnt1 up vs E15.5 * Ctrl |
| 10360664 | ENSMUSG0000C  | ENSMUST00000I | 1.60721e-005 | 1.78253 | E15.5 * Wnt1 up vs E15.5 * Ctrl |
| 10562204 | Fxyd7         | NM_022007     | 6.52058e-008 | 1.78163 | E15.5 * Wnt1 up vs E15.5 * Ctrl |
| 10505200 | Hsdl2         | NM_024255     | 1.73981e-007 | 1.78134 | E15.5 * Wnt1 up vs E15.5 * Ctrl |
| 10394990 | Mboat2        | NM_026037     | 1.43108e-006 | 1.78079 | E15.5 * Wnt1 up vs E15.5 * Ctrl |
| 10400157 | Nova1         | ENSMUST00000I | 1.01046e-006 | 1.78017 | E15.5 * Wnt1 up vs E15.5 * Ctrl |
| 10416112 | Pnma2         | NM_175498     | 8.52611e-006 | 1.77966 | E15.5 * Wnt1 up vs E15.5 * Ctrl |
| 10357164 | Epb4.1l5      | NM_145506     | 1.07017e-009 | 1.77849 | E15.5 * Wnt1 up vs E15.5 * Ctrl |
| 10360463 | Pld5          | NM_176916     | 0.000217881  | 1.77796 | E15.5 * Wnt1 up vs E15.5 * Ctrl |
| 10344637 | Atp6v1h       | NM_133826     | 8.51275e-009 | 1.77619 | E15.5 * Wnt1 up vs E15.5 * Ctrl |
| 10528227 | Gnai1         | NM_010305     | 6.23206e-007 | 1.7734  | E15.5 * Wnt1 up vs E15.5 * Ctrl |
| 10543067 | Asns          | NM_012055     | 5.50373e-007 | 1.77326 | E15.5 * Wnt1 up vs E15.5 * Ctrl |
| 10558001 | Inpp5f        | NM_178641     | 1.14947e-006 | 1.77321 | E15.5 * Wnt1 up vs E15.5 * Ctrl |
| 10522653 | A730089K16Rik | ENSMUST00000I | 4.33162e-005 | 1.7726  | E15.5 * Wnt1 up vs E15.5 * Ctrl |
| 10519913 | Magi2         | NM_015823     | 6.84682e-005 | 1.77005 | E15.5 * Wnt1 up vs E15.5 * Ctrl |
| 10581914 | Chst5         | NM_019950     | 2.39184e-006 | 1.76785 | E15.5 * Wnt1 up vs E15.5 * Ctrl |
| 10363917 | EG544705      | XR_032177     | 0.00330128   | 1.76542 | E15.5 * Wnt1 up vs E15.5 * Ctrl |
| 10418766 | Ankrd28       | NM_001024604  | 1.51676e-006 | 1.7648  | E15.5 * Wnt1 up vs E15.5 * Ctrl |
| 10352980 | Sntg1         | NM_027671     | 1.98778e-006 | 1.76453 | E15.5 * Wnt1 up vs E15.5 * Ctrl |
| 10396712 | Fut8          | NM_016893     | 3.85056e-006 | 1.76407 | E15.5 * Wnt1 up vs E15.5 * Ctrl |
| 10564237 | ENSMUSG0000C  | ENSMUST00000I | 7.64445e-005 | 1.7629  | E15.5 * Wnt1 up vs E15.5 * Ctrl |

|                        |              |              |         |                                 |
|------------------------|--------------|--------------|---------|---------------------------------|
| 10456289               | ---          | 2.24148e-005 | 1.76203 | E15.5 * Wnt1 up vs E15.5 * Ctrl |
| 10365833 Usp44         | NM_183199    | 3.4925e-005  | 1.76193 | E15.5 * Wnt1 up vs E15.5 * Ctrl |
| 10511363 Penk          | NM_001002927 | 0.000356291  | 1.76192 | E15.5 * Wnt1 up vs E15.5 * Ctrl |
| 10532892 1500011B03Rik | ENSMUST00000 | 2.75416e-009 | 1.76086 | E15.5 * Wnt1 up vs E15.5 * Ctrl |
| 10573128 Tbc1d9        | NM_001111304 | 1.14096e-010 | 1.76053 | E15.5 * Wnt1 up vs E15.5 * Ctrl |
| 10369885 Cisd1         | NM_134007    | 4.39462e-005 | 1.76022 | E15.5 * Wnt1 up vs E15.5 * Ctrl |
| 10597656 Scn5a         | NM_021544    | 9.95263e-006 | 1.7599  | E15.5 * Wnt1 up vs E15.5 * Ctrl |
| 10585699 Fabp5         | NM_010634    | 4.92785e-008 | 1.75863 | E15.5 * Wnt1 up vs E15.5 * Ctrl |
| 10594747 M5C1000I18Rik | AK147236     | 0.00114989   | 1.75813 | E15.5 * Wnt1 up vs E15.5 * Ctrl |
| 10427908 ENSMUSG0000C  | ENSMUST00000 | 0.000570314  | 1.75613 | E15.5 * Wnt1 up vs E15.5 * Ctrl |
| 10465089 Snx32         | NM_001024560 | 5.90322e-005 | 1.75498 | E15.5 * Wnt1 up vs E15.5 * Ctrl |
| 10400395 Ppp2r3c       | NM_021529    | 0.000129328  | 1.75487 | E15.5 * Wnt1 up vs E15.5 * Ctrl |
| 10539017 Reep1         | NM_178608    | 5.66458e-006 | 1.7544  | E15.5 * Wnt1 up vs E15.5 * Ctrl |
| 10547521 Atp6v1e1      | NM_007510    | 9.65199e-006 | 1.75263 | E15.5 * Wnt1 up vs E15.5 * Ctrl |
| 10412909 Fdft1         | NM_010191    | 2.17704e-005 | 1.75223 | E15.5 * Wnt1 up vs E15.5 * Ctrl |
| 10484888 Ptprj         | NM_008982    | 2.73727e-005 | 1.75199 | E15.5 * Wnt1 up vs E15.5 * Ctrl |
| 10526261 Stx1a         | NM_016801    | 4.12239e-007 | 1.7512  | E15.5 * Wnt1 up vs E15.5 * Ctrl |
| 10601343 Magee1        | NM_053201    | 0.000375451  | 1.75099 | E15.5 * Wnt1 up vs E15.5 * Ctrl |
| 10460127 Dok6          | NM_001039173 | 7.60475e-007 | 1.75085 | E15.5 * Wnt1 up vs E15.5 * Ctrl |
| 10380660 Hoxb2         | NM_134032    | 1.57971e-006 | 1.75076 | E15.5 * Wnt1 up vs E15.5 * Ctrl |
| 10572146 Atp6v1b2      | NM_007509    | 2.18601e-006 | 1.75055 | E15.5 * Wnt1 up vs E15.5 * Ctrl |
| 10560043 Zfp329        | NM_026046    | 1.996e-006   | 1.75043 | E15.5 * Wnt1 up vs E15.5 * Ctrl |
| 10357345 E030049G20Rik | NM_172484    | 8.57348e-005 | 1.75014 | E15.5 * Wnt1 up vs E15.5 * Ctrl |
| 10411156 Scamp1        | NM_029153    | 1.06808e-008 | 1.75008 | E15.5 * Wnt1 up vs E15.5 * Ctrl |
| 10532072 Hfm1          | BC172061     | 0.000947373  | 1.7498  | E15.5 * Wnt1 up vs E15.5 * Ctrl |
| 10590844 9030420J04Rik | BC137891     | 1.93305e-007 | 1.74829 | E15.5 * Wnt1 up vs E15.5 * Ctrl |
| 10360053 Pcp4l1        | NM_025557    | 0.000336187  | 1.74799 | E15.5 * Wnt1 up vs E15.5 * Ctrl |
| 10605465 Prkx          | NM_016979    | 0.000109702  | 1.74785 | E15.5 * Wnt1 up vs E15.5 * Ctrl |
| 10592515 Ubash3b       | NM_176860    | 4.21116e-006 | 1.74688 | E15.5 * Wnt1 up vs E15.5 * Ctrl |
| 10570437 Fbxo25        | NM_025785    | 1.80122e-006 | 1.74673 | E15.5 * Wnt1 up vs E15.5 * Ctrl |
| 10412038 Zswim6        | NM_145456    | 2.19757e-009 | 1.74664 | E15.5 * Wnt1 up vs E15.5 * Ctrl |
| 10465424 Nrnx2         | NM_020253    | 6.9094e-006  | 1.74602 | E15.5 * Wnt1 up vs E15.5 * Ctrl |
| 10418879 Mapk8         | NM_016700    | 8.53653e-008 | 1.74566 | E15.5 * Wnt1 up vs E15.5 * Ctrl |
| 10445241 Tnfrsf21      | NM_178589    | 1.38189e-006 | 1.74543 | E15.5 * Wnt1 up vs E15.5 * Ctrl |
| 10512291 Dctn3         | NM_016890    | 6.44746e-008 | 1.74441 | E15.5 * Wnt1 up vs E15.5 * Ctrl |
| 10522895 Csn3          | NM_007786    | 0.000336825  | 1.74436 | E15.5 * Wnt1 up vs E15.5 * Ctrl |
| 10471880               | ---          | 0.00499242   | 1.74345 | E15.5 * Wnt1 up vs E15.5 * Ctrl |
| 10360344 Darc          | NM_010045    | 2.97363e-006 | 1.74234 | E15.5 * Wnt1 up vs E15.5 * Ctrl |
| 10525553               | ---          | 0.00279183   | 1.74188 | E15.5 * Wnt1 up vs E15.5 * Ctrl |
| 10399208 Tmem196       | ENSMUST00000 | 0.0044184    | 1.74165 | E15.5 * Wnt1 up vs E15.5 * Ctrl |
| 10523772 Lrrc8d        | NM_178701    | 8.70451e-007 | 1.74117 | E15.5 * Wnt1 up vs E15.5 * Ctrl |
| 10519886 Sema3c        | NM_013657    | 3.87229e-008 | 1.74115 | E15.5 * Wnt1 up vs E15.5 * Ctrl |
| 10589913 Dync1li1      | NM_146229    | 4.5689e-007  | 1.74082 | E15.5 * Wnt1 up vs E15.5 * Ctrl |
| 10457886 ENSMUSG0000C  | ENSMUST00000 | 0.000129481  | 1.74062 | E15.5 * Wnt1 up vs E15.5 * Ctrl |
| 10403193 Sp4           | NM_009239    | 1.119e-005   | 1.74032 | E15.5 * Wnt1 up vs E15.5 * Ctrl |
| 10486403 Pla2g4e       | NM_177845    | 2.62497e-005 | 1.74021 | E15.5 * Wnt1 up vs E15.5 * Ctrl |
| 10604906 Ids           | NM_010498    | 1.28755e-006 | 1.73953 | E15.5 * Wnt1 up vs E15.5 * Ctrl |
| 10463164 Frat1         | NM_008043    | 4.58591e-006 | 1.73937 | E15.5 * Wnt1 up vs E15.5 * Ctrl |
| 10350733 Rgs16         | NM_011267    | 0.00139256   | 1.73873 | E15.5 * Wnt1 up vs E15.5 * Ctrl |
| 10594800 B230380D07Rik | NM_172772    | 0.00144037   | 1.73826 | E15.5 * Wnt1 up vs E15.5 * Ctrl |
| 10362208               | ---          | 0.00892822   | 1.73743 | E15.5 * Wnt1 up vs E15.5 * Ctrl |
| 10531544 Paqr3         | NM_198422    | 0.000205518  | 1.73705 | E15.5 * Wnt1 up vs E15.5 * Ctrl |
| 10350975 ENSMUSG0000C  | ENSMUST00000 | 0.000336262  | 1.73612 | E15.5 * Wnt1 up vs E15.5 * Ctrl |
| 10417599               | ---          | 0.0147763    | 1.73565 | E15.5 * Wnt1 up vs E15.5 * Ctrl |
| 10421524               | ---          | 0.0147763    | 1.73565 | E15.5 * Wnt1 up vs E15.5 * Ctrl |
| 10436826               | ---          | 0.0147763    | 1.73565 | E15.5 * Wnt1 up vs E15.5 * Ctrl |
| 10476658               | ---          | 0.0147763    | 1.73565 | E15.5 * Wnt1 up vs E15.5 * Ctrl |
| 10579823               | ---          | 0.0147763    | 1.73565 | E15.5 * Wnt1 up vs E15.5 * Ctrl |
| 10582845               | ---          | 0.0147763    | 1.73565 | E15.5 * Wnt1 up vs E15.5 * Ctrl |
| 10361358 Rgs17         | NM_019958    | 8.35082e-007 | 1.73292 | E15.5 * Wnt1 up vs E15.5 * Ctrl |
| 10394611 Nbas          | ENSMUST00000 | 2.52385e-007 | 1.73268 | E15.5 * Wnt1 up vs E15.5 * Ctrl |
| 10360764 Enah          | NM_010135    | 5.27936e-009 | 1.73218 | E15.5 * Wnt1 up vs E15.5 * Ctrl |
| 10527158 Fscn1         | NM_007984    | 0.00487262   | 1.732   | E15.5 * Wnt1 up vs E15.5 * Ctrl |
| 10416931 Slitrk5       | NM_198865    | 4.88787e-006 | 1.73137 | E15.5 * Wnt1 up vs E15.5 * Ctrl |
| 10466865 Rfx3          | NM_011265    | 2.9031e-006  | 1.731   | E15.5 * Wnt1 up vs E15.5 * Ctrl |
| 10472418 Scn9a         | ENSMUST00000 | 2.58241e-006 | 1.73009 | E15.5 * Wnt1 up vs E15.5 * Ctrl |

|          |               |              |              |         |                                 |
|----------|---------------|--------------|--------------|---------|---------------------------------|
| 10362896 | Cd24a         | NM_009846    | 1.3138e-009  | 1.72928 | E15.5 * Wnt1 up vs E15.5 * Ctrl |
| 10399407 | Vsnl1         | NM_012038    | 0.000554605  | 1.72883 | E15.5 * Wnt1 up vs E15.5 * Ctrl |
| 10460423 | Spnb3         | NM_021287    | 2.61301e-007 | 1.72799 | E15.5 * Wnt1 up vs E15.5 * Ctrl |
| 10457250 | Arhgap12      | NM_001039692 | 6.1069e-008  | 1.72741 | E15.5 * Wnt1 up vs E15.5 * Ctrl |
| 10397450 | Vash1         | NM_177354    | 3.79331e-006 | 1.72729 | E15.5 * Wnt1 up vs E15.5 * Ctrl |
| 10441091 | 6530402D11Rik | AK078339     | 4.41259e-006 | 1.72726 | E15.5 * Wnt1 up vs E15.5 * Ctrl |
| 10460057 | Tshz1         | NM_001081300 | 2.36371e-006 | 1.72679 | E15.5 * Wnt1 up vs E15.5 * Ctrl |
| 10396454 | Syt16         | NM_172804    | 4.87437e-008 | 1.72661 | E15.5 * Wnt1 up vs E15.5 * Ctrl |
| 10549200 | Sox5          | NM_011444    | 1.55593e-005 | 1.72648 | E15.5 * Wnt1 up vs E15.5 * Ctrl |
| 10527516 | Wasf3         | NM_145155    | 1.20213e-005 | 1.726   | E15.5 * Wnt1 up vs E15.5 * Ctrl |
| 10606473 | Hdx           | ENSMUST00000 | 0.000784988  | 1.72542 | E15.5 * Wnt1 up vs E15.5 * Ctrl |
| 10409660 | Gkap1         | NM_019832    | 0.000130326  | 1.72449 | E15.5 * Wnt1 up vs E15.5 * Ctrl |
| 10556463 | Arntl         | NM_007489    | 6.91035e-007 | 1.72411 | E15.5 * Wnt1 up vs E15.5 * Ctrl |
| 10578679 | ENSMUSG00000  | ENSMUST00000 | 7.48493e-007 | 1.72369 | E15.5 * Wnt1 up vs E15.5 * Ctrl |
| 10365290 | Chst11        | NM_021439    | 2.23328e-005 | 1.72365 | E15.5 * Wnt1 up vs E15.5 * Ctrl |
| 10472764 | Dync1i2       | NM_010064    | 5.88582e-009 | 1.72292 | E15.5 * Wnt1 up vs E15.5 * Ctrl |
| 10511819 | Klhl32        | NM_001033531 | 3.00393e-006 | 1.7227  | E15.5 * Wnt1 up vs E15.5 * Ctrl |
| 10459552 | Spire1        | NM_194355    | 1.58842e-008 | 1.72146 | E15.5 * Wnt1 up vs E15.5 * Ctrl |
| 10594144 | Bbs4          | NM_175325    | 4.08345e-005 | 1.72123 | E15.5 * Wnt1 up vs E15.5 * Ctrl |
| 10567022 | Btbd10        | NM_133700    | 2.02238e-005 | 1.7201  | E15.5 * Wnt1 up vs E15.5 * Ctrl |
| 10458794 | Ccdc112       | ENSMUST00000 | 6.09573e-008 | 1.71966 | E15.5 * Wnt1 up vs E15.5 * Ctrl |
| 10457020 | ---           | ---          | 0.0076316    | 1.71908 | E15.5 * Wnt1 up vs E15.5 * Ctrl |
| 10417310 | 666555        | ENSMUST00000 | 2.01856e-005 | 1.71888 | E15.5 * Wnt1 up vs E15.5 * Ctrl |
| 10541049 | March8        | NM_027920    | 1.61695e-006 | 1.71854 | E15.5 * Wnt1 up vs E15.5 * Ctrl |
| 10570516 | Kbtbd11       | NM_029116    | 5.3378e-008  | 1.71773 | E15.5 * Wnt1 up vs E15.5 * Ctrl |
| 10359419 | ---           | ---          | 0.000677645  | 1.71634 | E15.5 * Wnt1 up vs E15.5 * Ctrl |
| 10345058 | Tmem14a       | NM_029398    | 4.91272e-006 | 1.71622 | E15.5 * Wnt1 up vs E15.5 * Ctrl |
| 10606864 | Tceal5        | NM_177919    | 1.87821e-006 | 1.71621 | E15.5 * Wnt1 up vs E15.5 * Ctrl |
| 10372528 | Kcnmb4        | NM_021452    | 0.000310021  | 1.71453 | E15.5 * Wnt1 up vs E15.5 * Ctrl |
| 10468992 | Frmd4a        | NM_172475    | 4.59631e-007 | 1.71434 | E15.5 * Wnt1 up vs E15.5 * Ctrl |
| 10525487 | 4932422M17Rik | ENSMUST00000 | 6.67389e-005 | 1.71321 | E15.5 * Wnt1 up vs E15.5 * Ctrl |
| 10380341 | Spag9         | NM_027569    | 8.89252e-009 | 1.71143 | E15.5 * Wnt1 up vs E15.5 * Ctrl |
| 10575630 | Cntnap4       | NM_130457    | 1.80257e-005 | 1.71137 | E15.5 * Wnt1 up vs E15.5 * Ctrl |
| 10398727 | Klc1          | NM_001025360 | 7.52799e-006 | 1.71104 | E15.5 * Wnt1 up vs E15.5 * Ctrl |
| 10362596 | Fyn           | NM_001122893 | 8.10066e-013 | 1.7109  | E15.5 * Wnt1 up vs E15.5 * Ctrl |
| 10356379 | Ecel1         | NM_021306    | 2.1467e-006  | 1.71072 | E15.5 * Wnt1 up vs E15.5 * Ctrl |
| 10427303 | Hoxc4         | NM_013553    | 1.77095e-005 | 1.71062 | E15.5 * Wnt1 up vs E15.5 * Ctrl |
| 10533869 | Ccdc92        | NM_144819    | 1.90284e-005 | 1.71004 | E15.5 * Wnt1 up vs E15.5 * Ctrl |
| 10564624 | St8sia2       | NM_009181    | 9.36071e-006 | 1.70972 | E15.5 * Wnt1 up vs E15.5 * Ctrl |
| 10481804 | Ralgps1       | NM_175211    | 1.86608e-006 | 1.70872 | E15.5 * Wnt1 up vs E15.5 * Ctrl |
| 10426081 | Fam19a5       | NM_134096    | 7.54281e-005 | 1.70811 | E15.5 * Wnt1 up vs E15.5 * Ctrl |
| 10564220 | Gkap1         | NM_019832    | 2.94767e-005 | 1.70809 | E15.5 * Wnt1 up vs E15.5 * Ctrl |
| 10515335 | RP23-233B9.8  | NM_001037916 | 3.63718e-006 | 1.70657 | E15.5 * Wnt1 up vs E15.5 * Ctrl |
| 10471878 | ---           | ---          | 0.00136431   | 1.70552 | E15.5 * Wnt1 up vs E15.5 * Ctrl |
| 10558450 | ENSMUSG00000  | ENSMUST00000 | 0.000399799  | 1.70547 | E15.5 * Wnt1 up vs E15.5 * Ctrl |
| 10512915 | 2810432L12Rik | NM_025944    | 5.72803e-005 | 1.70473 | E15.5 * Wnt1 up vs E15.5 * Ctrl |
| 10372069 | Socs2         | NM_007706    | 1.53781e-005 | 1.70455 | E15.5 * Wnt1 up vs E15.5 * Ctrl |
| 10369210 | Serinc1       | NM_019760    | 2.45132e-008 | 1.7045  | E15.5 * Wnt1 up vs E15.5 * Ctrl |
| 10504137 | 4933409K07Rik | BC072647     | 8.52654e-005 | 1.7045  | E15.5 * Wnt1 up vs E15.5 * Ctrl |
| 10504201 | 4933409K07Rik | BC072647     | 8.52654e-005 | 1.7045  | E15.5 * Wnt1 up vs E15.5 * Ctrl |
| 10512350 | 4933409K07Rik | BC072647     | 8.52654e-005 | 1.7045  | E15.5 * Wnt1 up vs E15.5 * Ctrl |
| 10512352 | 4933409K07Rik | BC072647     | 8.52654e-005 | 1.7045  | E15.5 * Wnt1 up vs E15.5 * Ctrl |
| 10544751 | Hoxa2         | NM_010451    | 2.66226e-005 | 1.70387 | E15.5 * Wnt1 up vs E15.5 * Ctrl |
| 10494945 | Syt6          | NM_018800    | 1.27399e-006 | 1.70378 | E15.5 * Wnt1 up vs E15.5 * Ctrl |
| 10469622 | Gpr158        | NM_001004761 | 3.11976e-006 | 1.7023  | E15.5 * Wnt1 up vs E15.5 * Ctrl |
| 10592336 | Spa17         | NM_011449    | 0.000314452  | 1.70011 | E15.5 * Wnt1 up vs E15.5 * Ctrl |
| 10558248 | Bub3          | NM_009774    | 3.50833e-009 | 1.69987 | E15.5 * Wnt1 up vs E15.5 * Ctrl |
| 10370587 | Shc2          | NM_001024539 | 0.000431061  | 1.69951 | E15.5 * Wnt1 up vs E15.5 * Ctrl |
| 10464409 | Nanos1        | NM_178421    | 2.23166e-008 | 1.69895 | E15.5 * Wnt1 up vs E15.5 * Ctrl |
| 10463704 | As3mt         | NM_020577    | 9.35362e-008 | 1.69751 | E15.5 * Wnt1 up vs E15.5 * Ctrl |
| 10590445 | Snrk          | NM_133741    | 1.19732e-006 | 1.69732 | E15.5 * Wnt1 up vs E15.5 * Ctrl |
| 10413398 | Il17rd        | NM_134437    | 7.58495e-006 | 1.69637 | E15.5 * Wnt1 up vs E15.5 * Ctrl |
| 10429295 | Kcnk9         | NM_001033876 | 4.61722e-006 | 1.69615 | E15.5 * Wnt1 up vs E15.5 * Ctrl |
| 10594802 | B230380D07Rik | NM_172772    | 2.48686e-005 | 1.69555 | E15.5 * Wnt1 up vs E15.5 * Ctrl |
| 10495869 | Tram1l1       | NM_146140    | 4.80121e-006 | 1.69548 | E15.5 * Wnt1 up vs E15.5 * Ctrl |
| 10563975 | ---           | ---          | 2.48399e-008 | 1.69515 | E15.5 * Wnt1 up vs E15.5 * Ctrl |

|                         |              |              |         |                                 |
|-------------------------|--------------|--------------|---------|---------------------------------|
| 10563981                | ---          | 2.48399e-008 | 1.69515 | E15.5 * Wnt1 up vs E15.5 * Ctrl |
| 10563987                | ---          | 2.48399e-008 | 1.69515 | E15.5 * Wnt1 up vs E15.5 * Ctrl |
| 10564009                | ---          | 2.48399e-008 | 1.69515 | E15.5 * Wnt1 up vs E15.5 * Ctrl |
| 10379654 Ap2b1          | NM_001035854 | 3.12793e-009 | 1.69438 | E15.5 * Wnt1 up vs E15.5 * Ctrl |
| 10588509 Pcbp4          | NM_021567    | 0.00203967   | 1.69398 | E15.5 * Wnt1 up vs E15.5 * Ctrl |
| 10439881 5330426P16Rik  | ENSMUST00000 | 7.7838e-006  | 1.69364 | E15.5 * Wnt1 up vs E15.5 * Ctrl |
| 10583847 Bbs9           | NM_178415    | 6.18363e-007 | 1.69309 | E15.5 * Wnt1 up vs E15.5 * Ctrl |
| 10462613 Ifit2          | NM_008332    | 3.32416e-007 | 1.69229 | E15.5 * Wnt1 up vs E15.5 * Ctrl |
| 10364502 Palm           | NM_023128    | 4.28213e-005 | 1.69071 | E15.5 * Wnt1 up vs E15.5 * Ctrl |
| 10455227 Rnf14          | NM_020012    | 1.37206e-009 | 1.69026 | E15.5 * Wnt1 up vs E15.5 * Ctrl |
| 10496262 Nhdc2          | NM_178877    | 6.6238e-005  | 1.68999 | E15.5 * Wnt1 up vs E15.5 * Ctrl |
| 10514779 Prkaa2         | NM_178143    | 1.29203e-005 | 1.68931 | E15.5 * Wnt1 up vs E15.5 * Ctrl |
| 10362717 Wasf1          | NM_031877    | 8.05079e-009 | 1.68864 | E15.5 * Wnt1 up vs E15.5 * Ctrl |
| 10459671 Dcc            | NM_007831    | 3.45649e-007 | 1.6886  | E15.5 * Wnt1 up vs E15.5 * Ctrl |
| 10592850 Trappc4        | NM_021789    | 2.17793e-005 | 1.68836 | E15.5 * Wnt1 up vs E15.5 * Ctrl |
| 10483626 Dlx2           | NM_010054    | 3.606e-006   | 1.68767 | E15.5 * Wnt1 up vs E15.5 * Ctrl |
| 10543219 Gpr85          | NM_145066    | 1.18936e-006 | 1.68718 | E15.5 * Wnt1 up vs E15.5 * Ctrl |
| 10465342 Tm7sf2         | NM_028454    | 4.0771e-006  | 1.68676 | E15.5 * Wnt1 up vs E15.5 * Ctrl |
| 10570450 Dlgap2         | NM_172910    | 6.80558e-006 | 1.68596 | E15.5 * Wnt1 up vs E15.5 * Ctrl |
| 10469720 Acbd5          | NM_001102437 | 4.01204e-006 | 1.68558 | E15.5 * Wnt1 up vs E15.5 * Ctrl |
| 10404763 Tmem170b       | XM_886379    | 3.16877e-006 | 1.68296 | E15.5 * Wnt1 up vs E15.5 * Ctrl |
| 10559964 Zik1           | NM_009577    | 5.1952e-005  | 1.68261 | E15.5 * Wnt1 up vs E15.5 * Ctrl |
| 10550925 Zfp428         | NM_146183    | 5.34123e-009 | 1.68214 | E15.5 * Wnt1 up vs E15.5 * Ctrl |
| 10580534                | ---          | 2.33712e-007 | 1.68189 | E15.5 * Wnt1 up vs E15.5 * Ctrl |
| 10485633 ENSMUSG0000C   | ENSMUST00000 | 0.00814703   | 1.68146 | E15.5 * Wnt1 up vs E15.5 * Ctrl |
| 10404848 Jarid2         | NM_021878    | 1.16099e-009 | 1.68084 | E15.5 * Wnt1 up vs E15.5 * Ctrl |
| 10576010 Gse1           | NM_198671    | 2.68238e-005 | 1.6797  | E15.5 * Wnt1 up vs E15.5 * Ctrl |
| 10544406 Fam131b        | NM_029528    | 4.58044e-006 | 1.67906 | E15.5 * Wnt1 up vs E15.5 * Ctrl |
| 10606893 Rab9b          | NM_176971    | 3.25309e-005 | 1.67903 | E15.5 * Wnt1 up vs E15.5 * Ctrl |
| 10533323 Adam1a         | NM_172126    | 0.000116006  | 1.67897 | E15.5 * Wnt1 up vs E15.5 * Ctrl |
| 10417498 666555         | ENSMUST00000 | 0.000567914  | 1.67891 | E15.5 * Wnt1 up vs E15.5 * Ctrl |
| 10376033 Kif3a          | NM_008443    | 3.858e-009   | 1.67836 | E15.5 * Wnt1 up vs E15.5 * Ctrl |
| 10420785 Mtmr9          | ENSMUST00000 | 0.00062054   | 1.6783  | E15.5 * Wnt1 up vs E15.5 * Ctrl |
| 10604053 Nkrf           | NM_029891    | 3.92487e-006 | 1.67794 | E15.5 * Wnt1 up vs E15.5 * Ctrl |
| 10589784 Dclk3          | NM_172928    | 2.3655e-006  | 1.67782 | E15.5 * Wnt1 up vs E15.5 * Ctrl |
| 10424411 Tsg101         | NM_021884    | 5.91919e-008 | 1.67766 | E15.5 * Wnt1 up vs E15.5 * Ctrl |
| 10590487 Zfp660         | XR_031805    | 0.00411177   | 1.67744 | E15.5 * Wnt1 up vs E15.5 * Ctrl |
| 10373740 Pik3ip1        | NM_178149    | 6.25112e-006 | 1.67733 | E15.5 * Wnt1 up vs E15.5 * Ctrl |
| 10535866 Ubl3           | NM_011908    | 1.12911e-008 | 1.67699 | E15.5 * Wnt1 up vs E15.5 * Ctrl |
| 10595924 Pik3cb         | NM_029094    | 0.000138231  | 1.67688 | E15.5 * Wnt1 up vs E15.5 * Ctrl |
| 10396952 Ttc9           | NM_001033149 | 5.15747e-005 | 1.67611 | E15.5 * Wnt1 up vs E15.5 * Ctrl |
| 10575777 4933407C03Rik  | BC158118     | 9.08755e-006 | 1.67594 | E15.5 * Wnt1 up vs E15.5 * Ctrl |
| 10603768 Efhc2          | NM_028916    | 1.3195e-005  | 1.67573 | E15.5 * Wnt1 up vs E15.5 * Ctrl |
| 10439239 Dirc2          | NM_153550    | 5.67653e-006 | 1.6756  | E15.5 * Wnt1 up vs E15.5 * Ctrl |
| 10607089 Acsf4          | NM_207625    | 5.59448e-006 | 1.6756  | E15.5 * Wnt1 up vs E15.5 * Ctrl |
| 10571745 Cldn22         | NM_029383    | 8.26028e-007 | 1.67555 | E15.5 * Wnt1 up vs E15.5 * Ctrl |
| 10518763 Slc45a1        | NM_173774    | 8.26832e-006 | 1.67537 | E15.5 * Wnt1 up vs E15.5 * Ctrl |
| 10516544 Hpca           | NM_010471    | 3.06129e-005 | 1.67414 | E15.5 * Wnt1 up vs E15.5 * Ctrl |
| 10592471 Gramd1b        | NM_172768    | 1.74811e-005 | 1.67359 | E15.5 * Wnt1 up vs E15.5 * Ctrl |
| 10436442 Fam60a         | NM_019643    | 8.13501e-009 | 1.67351 | E15.5 * Wnt1 up vs E15.5 * Ctrl |
| 10596940 P4htm          | NM_028944    | 1.16739e-006 | 1.67286 | E15.5 * Wnt1 up vs E15.5 * Ctrl |
| 10472376 Scn2a1         | NM_001099298 | 4.19426e-005 | 1.67152 | E15.5 * Wnt1 up vs E15.5 * Ctrl |
| 10448865 Gnptg          | NM_172529    | 2.08551e-008 | 1.67103 | E15.5 * Wnt1 up vs E15.5 * Ctrl |
| 10409602 Trpc7          | NM_012035    | 1.52354e-005 | 1.6707  | E15.5 * Wnt1 up vs E15.5 * Ctrl |
| 10549497 3010003L21Rik  | BC106181     | 2.67527e-009 | 1.67061 | E15.5 * Wnt1 up vs E15.5 * Ctrl |
| 10354207 Creg2          | NM_170597    | 8.1517e-005  | 1.67049 | E15.5 * Wnt1 up vs E15.5 * Ctrl |
| 10595979 Mras           | NM_008624    | 0.00212338   | 1.6704  | E15.5 * Wnt1 up vs E15.5 * Ctrl |
| 10363599 Rufy2          | NM_027425    | 6.71019e-007 | 1.67029 | E15.5 * Wnt1 up vs E15.5 * Ctrl |
| 10551417 Zfp59          | NM_011762    | 1.17143e-010 | 1.66933 | E15.5 * Wnt1 up vs E15.5 * Ctrl |
| 10477103 Nrsn2          | NM_001009948 | 0.000676804  | 1.66847 | E15.5 * Wnt1 up vs E15.5 * Ctrl |
| 10605566                | ---          | 0.000356747  | 1.66748 | E15.5 * Wnt1 up vs E15.5 * Ctrl |
| 10524684 Msi1           | NM_008629    | 0.000550516  | 1.66706 | E15.5 * Wnt1 up vs E15.5 * Ctrl |
| 10475324 Ckmt1          | NM_009897    | 0.00162339   | 1.66677 | E15.5 * Wnt1 up vs E15.5 * Ctrl |
| 10508376 Trim62         | NM_178110    | 1.45344e-008 | 1.66675 | E15.5 * Wnt1 up vs E15.5 * Ctrl |
| 10395805 1700047117Rik1 | BC049669     | 1.65088e-006 | 1.66651 | E15.5 * Wnt1 up vs E15.5 * Ctrl |
| 10516241 Maneal         | NM_001007573 | 1.16113e-005 | 1.66602 | E15.5 * Wnt1 up vs E15.5 * Ctrl |

|                         |              |              |         |                                 |
|-------------------------|--------------|--------------|---------|---------------------------------|
| 10554166 Akap13         | NM_029332    | 2.37029e-008 | 1.66576 | E15.5 * Wnt1 up vs E15.5 * Ctrl |
| 10569830 2310057J16Rik  | NM_027171    | 6.50542e-006 | 1.66517 | E15.5 * Wnt1 up vs E15.5 * Ctrl |
| 10469609 OTTMUSG00000   | ENSMUST00000 | 0.0113043    | 1.66424 | E15.5 * Wnt1 up vs E15.5 * Ctrl |
| 10434446 Ece2           | NM_139293    | 2.62597e-006 | 1.66421 | E15.5 * Wnt1 up vs E15.5 * Ctrl |
| 10416110 EG432870       | NM_001034881 | 0.000563953  | 1.66399 | E15.5 * Wnt1 up vs E15.5 * Ctrl |
| 10557106 Hs3st2         | NM_001081327 | 2.90456e-005 | 1.66394 | E15.5 * Wnt1 up vs E15.5 * Ctrl |
| 10590983 Panx1          | NM_019482    | 2.84739e-006 | 1.66334 | E15.5 * Wnt1 up vs E15.5 * Ctrl |
| 10498076 Maml3          | NM_001004176 | 2.51933e-006 | 1.66089 | E15.5 * Wnt1 up vs E15.5 * Ctrl |
| 10543118 Glcc1          | NM_133236    | 1.72794e-006 | 1.66087 | E15.5 * Wnt1 up vs E15.5 * Ctrl |
| 10595094 2310046A06Rik  | BC089626     | 0.00071933   | 1.65967 | E15.5 * Wnt1 up vs E15.5 * Ctrl |
| 10407124 Al452195       | ENSMUST00000 | 0.00567861   | 1.65856 | E15.5 * Wnt1 up vs E15.5 * Ctrl |
| 10563909                | ---          | 2.61284e-008 | 1.65822 | E15.5 * Wnt1 up vs E15.5 * Ctrl |
| 10577996 Unc5d          | NM_153135    | 0.000109094  | 1.65805 | E15.5 * Wnt1 up vs E15.5 * Ctrl |
| 10442396 Abca3          | NM_013855    | 2.46936e-007 | 1.65779 | E15.5 * Wnt1 up vs E15.5 * Ctrl |
| 10433445 Abat           | NM_172961    | 0.000416653  | 1.65656 | E15.5 * Wnt1 up vs E15.5 * Ctrl |
| 10479726 Pcmt2          | NM_153594    | 3.94755e-007 | 1.65654 | E15.5 * Wnt1 up vs E15.5 * Ctrl |
| 10575775 4933407C03Rik  | BC158118     | 4.22824e-006 | 1.65622 | E15.5 * Wnt1 up vs E15.5 * Ctrl |
| 10452793 Galnt14        | NM_027864    | 1.8191e-005  | 1.65614 | E15.5 * Wnt1 up vs E15.5 * Ctrl |
| 10366725 Fam19a2        | NM_182807    | 1.58203e-007 | 1.65609 | E15.5 * Wnt1 up vs E15.5 * Ctrl |
| 10483604 Slc25a12       | NM_172436    | 7.03434e-006 | 1.65593 | E15.5 * Wnt1 up vs E15.5 * Ctrl |
| 10447480 Nrxn1          | NM_020252    | 3.62997e-005 | 1.65544 | E15.5 * Wnt1 up vs E15.5 * Ctrl |
| 10503259 Trp53inp1      | NM_021897    | 1.51207e-006 | 1.65477 | E15.5 * Wnt1 up vs E15.5 * Ctrl |
| 10605797 Arhgef9        | NM_001033329 | 1.66958e-007 | 1.65451 | E15.5 * Wnt1 up vs E15.5 * Ctrl |
| 10395961 Lrnf5          | NM_178714    | 2.93866e-005 | 1.65442 | E15.5 * Wnt1 up vs E15.5 * Ctrl |
| 10535021 Gpc2           | NM_172412    | 1.95779e-005 | 1.65415 | E15.5 * Wnt1 up vs E15.5 * Ctrl |
| 10490061 Bcas1          | NM_029815    | 5.75001e-007 | 1.65371 | E15.5 * Wnt1 up vs E15.5 * Ctrl |
| 10585347 4930550C14Rik  | NM_029247    | 0.00030841   | 1.65356 | E15.5 * Wnt1 up vs E15.5 * Ctrl |
| 10452404 Nudt12         | NM_026497    | 1.77191e-005 | 1.65322 | E15.5 * Wnt1 up vs E15.5 * Ctrl |
| 10558773 B4galnt4       | NM_177897    | 3.00118e-005 | 1.65236 | E15.5 * Wnt1 up vs E15.5 * Ctrl |
| 10565900 D630004N19Rik  | BC096037     | 0.00644802   | 1.65227 | E15.5 * Wnt1 up vs E15.5 * Ctrl |
| 10352926                | ---          | 0.00313385   | 1.65129 | E15.5 * Wnt1 up vs E15.5 * Ctrl |
| 10383564 Fn3k           | NM_001038699 | 2.43306e-006 | 1.65035 | E15.5 * Wnt1 up vs E15.5 * Ctrl |
| 10505073 Zfp462         | NM_172867    | 6.52144e-008 | 1.65001 | E15.5 * Wnt1 up vs E15.5 * Ctrl |
| 10409345 Cltb           | NM_028870    | 5.60943e-005 | 1.64988 | E15.5 * Wnt1 up vs E15.5 * Ctrl |
| 10403716 AW209491       | NM_134067    | 2.5798e-006  | 1.64936 | E15.5 * Wnt1 up vs E15.5 * Ctrl |
| 10594501 Ptplad1        | NM_021345    | 1.66218e-005 | 1.64909 | E15.5 * Wnt1 up vs E15.5 * Ctrl |
| 10550274 Meis3          | NM_008627    | 3.81431e-007 | 1.64889 | E15.5 * Wnt1 up vs E15.5 * Ctrl |
| 10367973 Aig1           | NM_025446    | 0.00022862   | 1.64774 | E15.5 * Wnt1 up vs E15.5 * Ctrl |
| 10519420 Akap9          | NM_194462    | 2.37225e-008 | 1.64697 | E15.5 * Wnt1 up vs E15.5 * Ctrl |
| 10474411 Lin7c          | NM_011699    | 4.65653e-011 | 1.64645 | E15.5 * Wnt1 up vs E15.5 * Ctrl |
| 10585146 Tmprss5        | NM_030709    | 9.03603e-005 | 1.64537 | E15.5 * Wnt1 up vs E15.5 * Ctrl |
| 10534021 Rimb2          | NM_001081388 | 4.17491e-009 | 1.64535 | E15.5 * Wnt1 up vs E15.5 * Ctrl |
| 10389738 Dgke           | NM_019505    | 2.68148e-006 | 1.64395 | E15.5 * Wnt1 up vs E15.5 * Ctrl |
| 10399234 Efr3b          | NM_001082483 | 1.46519e-006 | 1.64369 | E15.5 * Wnt1 up vs E15.5 * Ctrl |
| 10446066 A230051N06Rik  | ENSMUST00000 | 3.37025e-005 | 1.64326 | E15.5 * Wnt1 up vs E15.5 * Ctrl |
| 10457022 Mbp            | NM_010777    | 1.79464e-006 | 1.643   | E15.5 * Wnt1 up vs E15.5 * Ctrl |
| 10603492 Porcn          | NM_016913    | 1.75226e-007 | 1.64207 | E15.5 * Wnt1 up vs E15.5 * Ctrl |
| 10360506 Akt3           | NM_011785    | 2.87958e-008 | 1.64166 | E15.5 * Wnt1 up vs E15.5 * Ctrl |
| 10426955 Scn8a          | NM_001077499 | 5.15652e-006 | 1.641   | E15.5 * Wnt1 up vs E15.5 * Ctrl |
| 10440314 Cadm2          | NM_178721    | 4.94858e-006 | 1.64085 | E15.5 * Wnt1 up vs E15.5 * Ctrl |
| 10345401 Fam123c        | BC070435     | 6.91613e-005 | 1.64029 | E15.5 * Wnt1 up vs E15.5 * Ctrl |
| 10460987 Nrxn2          | NM_020253    | 7.52308e-006 | 1.63984 | E15.5 * Wnt1 up vs E15.5 * Ctrl |
| 10395770 1700047I17Rik1 | BC048158     | 7.32462e-007 | 1.63953 | E15.5 * Wnt1 up vs E15.5 * Ctrl |
| 10395780 1700047I17Rik1 | BC048158     | 7.32462e-007 | 1.63953 | E15.5 * Wnt1 up vs E15.5 * Ctrl |
| 10419399 Slc35f4        | NM_029238    | 9.24421e-005 | 1.63919 | E15.5 * Wnt1 up vs E15.5 * Ctrl |
| 10451054 Enpp4          | NM_199016    | 4.68238e-005 | 1.63887 | E15.5 * Wnt1 up vs E15.5 * Ctrl |
| 10432404 Tuba1a         | NM_011653    | 1.40038e-007 | 1.63841 | E15.5 * Wnt1 up vs E15.5 * Ctrl |
| 10491212 6130401L20Rik  | BC117810     | 0.00034584   | 1.63794 | E15.5 * Wnt1 up vs E15.5 * Ctrl |
| 10531653 BC062109       | BC055321     | 0.000535238  | 1.63722 | E15.5 * Wnt1 up vs E15.5 * Ctrl |
| 10497309 Snx16          | NM_029068    | 0.00213408   | 1.63641 | E15.5 * Wnt1 up vs E15.5 * Ctrl |
| 10359235 Rasal2         | NM_177644    | 1.23404e-008 | 1.63619 | E15.5 * Wnt1 up vs E15.5 * Ctrl |
| 10564839 Ap3s2          | NM_009682    | 5.20442e-005 | 1.63581 | E15.5 * Wnt1 up vs E15.5 * Ctrl |
| 10520392 Rnf32          | NM_021470    | 0.000406262  | 1.63569 | E15.5 * Wnt1 up vs E15.5 * Ctrl |
| 10420730 Fdft1          | NM_010191    | 1.29433e-006 | 1.63542 | E15.5 * Wnt1 up vs E15.5 * Ctrl |
| 10538408 2410066E13Rik  | BC042507     | 2.69996e-006 | 1.63488 | E15.5 * Wnt1 up vs E15.5 * Ctrl |
| 10588876 Nicn1          | NM_025449    | 0.000318774  | 1.63463 | E15.5 * Wnt1 up vs E15.5 * Ctrl |

|          |               |              |              |         |                                 |
|----------|---------------|--------------|--------------|---------|---------------------------------|
| 10389339 | Usp32         | NM_001029934 | 3.63513e-005 | 1.63448 | E15.5 * Wnt1 up vs E15.5 * Ctrl |
| 10581573 | ---           | ---          | 3.57397e-005 | 1.63441 | E15.5 * Wnt1 up vs E15.5 * Ctrl |
| 10467216 | Cpeb3         | NM_198300    | 2.03339e-006 | 1.63361 | E15.5 * Wnt1 up vs E15.5 * Ctrl |
| 10431410 | Mapk11        | NM_011161    | 2.5387e-005  | 1.6336  | E15.5 * Wnt1 up vs E15.5 * Ctrl |
| 10594631 | Aph1b         | NM_177583    | 1.97042e-006 | 1.63215 | E15.5 * Wnt1 up vs E15.5 * Ctrl |
| 10522661 | C530008M17Rik | AK122469     | 1.49261e-005 | 1.63061 | E15.5 * Wnt1 up vs E15.5 * Ctrl |
| 10412036 | Apoo-ps       | NR_004438    | 7.1196e-005  | 1.63056 | E15.5 * Wnt1 up vs E15.5 * Ctrl |
| 10587604 | Rwdd2a        | NM_027100    | 3.7445e-005  | 1.62991 | E15.5 * Wnt1 up vs E15.5 * Ctrl |
| 10414802 | Trav16d       | ENSMUST00000 | 0.00316715   | 1.62936 | E15.5 * Wnt1 up vs E15.5 * Ctrl |
| 10532542 | Sez6l         | NM_019982    | 5.99515e-006 | 1.62917 | E15.5 * Wnt1 up vs E15.5 * Ctrl |
| 10488020 | Tmx4          | NM_029148    | 0.000849736  | 1.62847 | E15.5 * Wnt1 up vs E15.5 * Ctrl |
| 10606315 | Taf9b         | NM_001001176 | 0.000708513  | 1.62713 | E15.5 * Wnt1 up vs E15.5 * Ctrl |
| 10380654 | Hoxb3         | NM_001079869 | 0.000241308  | 1.62709 | E15.5 * Wnt1 up vs E15.5 * Ctrl |
| 10364601 | Abca7         | NM_013850    | 4.17597e-007 | 1.62646 | E15.5 * Wnt1 up vs E15.5 * Ctrl |
| 10395889 | Sstr1         | NM_009216    | 0.000170242  | 1.62613 | E15.5 * Wnt1 up vs E15.5 * Ctrl |
| 10546884 | Lhfp14        | NM_177763    | 7.79709e-006 | 1.62599 | E15.5 * Wnt1 up vs E15.5 * Ctrl |
| 10600524 | Vbp1          | NM_011692    | 0.000127184  | 1.62536 | E15.5 * Wnt1 up vs E15.5 * Ctrl |
| 10431147 | Ldoc1l        | NM_177630    | 3.90278e-005 | 1.62492 | E15.5 * Wnt1 up vs E15.5 * Ctrl |
| 10517312 | Tmem57        | NM_025382    | 5.02929e-007 | 1.62466 | E15.5 * Wnt1 up vs E15.5 * Ctrl |
| 10477649 | Acss2         | NM_019811    | 3.71304e-006 | 1.62465 | E15.5 * Wnt1 up vs E15.5 * Ctrl |
| 10352954 | Hmgb3         | NM_008253    | 1.19732e-009 | 1.62462 | E15.5 * Wnt1 up vs E15.5 * Ctrl |
| 10456206 | Wdr7          | NM_001014981 | 9.20671e-008 | 1.62381 | E15.5 * Wnt1 up vs E15.5 * Ctrl |
| 10486201 | OTTMUSG00000  | ENSMUST00000 | 0.00132214   | 1.62358 | E15.5 * Wnt1 up vs E15.5 * Ctrl |
| 10520109 | ---           | ---          | 0.00331041   | 1.62314 | E15.5 * Wnt1 up vs E15.5 * Ctrl |
| 10492516 | lqcj          | NM_177585    | 2.9561e-006  | 1.6231  | E15.5 * Wnt1 up vs E15.5 * Ctrl |
| 10438813 | ---           | ---          | 0.00325332   | 1.62274 | E15.5 * Wnt1 up vs E15.5 * Ctrl |
| 10565152 | 9330120H11Rik | ENSMUST00000 | 0.000155116  | 1.62247 | E15.5 * Wnt1 up vs E15.5 * Ctrl |
| 10385203 | Odz2          | NM_011856    | 2.07661e-005 | 1.62219 | E15.5 * Wnt1 up vs E15.5 * Ctrl |
| 10453373 | Prepl         | NM_145984    | 1.20074e-005 | 1.62212 | E15.5 * Wnt1 up vs E15.5 * Ctrl |
| 10504902 | Murc          | NM_026509    | 1.75784e-005 | 1.62133 | E15.5 * Wnt1 up vs E15.5 * Ctrl |
| 10388492 | Vps53         | NM_026664    | 1.11432e-008 | 1.62102 | E15.5 * Wnt1 up vs E15.5 * Ctrl |
| 10442270 | 1300003B13Rik | BC025651     | 0.000118838  | 1.62029 | E15.5 * Wnt1 up vs E15.5 * Ctrl |
| 10549222 | Bcat1         | NM_001024468 | 0.00011359   | 1.61912 | E15.5 * Wnt1 up vs E15.5 * Ctrl |
| 10376216 | Slc36a1       | NM_153139    | 0.000361495  | 1.61909 | E15.5 * Wnt1 up vs E15.5 * Ctrl |
| 10438815 | 1600021P15Rik | NM_177718    | 1.97197e-006 | 1.61869 | E15.5 * Wnt1 up vs E15.5 * Ctrl |
| 10490724 | Samd10        | NM_172676    | 2.98806e-006 | 1.61833 | E15.5 * Wnt1 up vs E15.5 * Ctrl |
| 10363905 | Zwint         | NM_025635    | 1.56563e-008 | 1.61709 | E15.5 * Wnt1 up vs E15.5 * Ctrl |
| 10418991 | Gcap14        | NM_027045    | 2.32364e-007 | 1.61678 | E15.5 * Wnt1 up vs E15.5 * Ctrl |
| 10392642 | Abca5         | NM_147219    | 7.25181e-005 | 1.61675 | E15.5 * Wnt1 up vs E15.5 * Ctrl |
| 10562125 | Ffar3         | NM_001033316 | 2.46574e-005 | 1.61559 | E15.5 * Wnt1 up vs E15.5 * Ctrl |
| 10379998 | Trim37        | NM_197987    | 6.2416e-008  | 1.61553 | E15.5 * Wnt1 up vs E15.5 * Ctrl |
| 10442231 | ---           | ---          | 0.000758667  | 1.61481 | E15.5 * Wnt1 up vs E15.5 * Ctrl |
| 10586971 | Prtg          | NM_175485    | 0.000110834  | 1.61477 | E15.5 * Wnt1 up vs E15.5 * Ctrl |
| 10546476 | Magi1         | NM_001029850 | 4.48562e-007 | 1.61469 | E15.5 * Wnt1 up vs E15.5 * Ctrl |
| 10388648 | Ankrd13b      | NM_172945    | 2.57802e-005 | 1.61373 | E15.5 * Wnt1 up vs E15.5 * Ctrl |
| 10495193 | Kcna2         | NM_008417    | 1.9427e-005  | 1.61351 | E15.5 * Wnt1 up vs E15.5 * Ctrl |
| 10386909 | Cenpv         | NM_028448    | 4.67834e-005 | 1.61315 | E15.5 * Wnt1 up vs E15.5 * Ctrl |
| 10467599 | Slit1         | NM_015748    | 7.83522e-005 | 1.61289 | E15.5 * Wnt1 up vs E15.5 * Ctrl |
| 10456836 | St8sia5       | NM_153124    | 1.43102e-005 | 1.61286 | E15.5 * Wnt1 up vs E15.5 * Ctrl |
| 10362171 | Stx7          | NM_016797    | 8.06919e-007 | 1.61122 | E15.5 * Wnt1 up vs E15.5 * Ctrl |
| 10471967 | Mbd5          | NM_029924    | 1.61698e-005 | 1.61108 | E15.5 * Wnt1 up vs E15.5 * Ctrl |
| 10417403 | 666555        | ENSMUST00000 | 2.64294e-005 | 1.60978 | E15.5 * Wnt1 up vs E15.5 * Ctrl |
| 10599654 | Cxx1c         | NM_028375    | 0.000160066  | 1.60966 | E15.5 * Wnt1 up vs E15.5 * Ctrl |
| 10497505 | Nlgn1         | NM_138666    | 0.000164585  | 1.60958 | E15.5 * Wnt1 up vs E15.5 * Ctrl |
| 10372583 | Rab3ip        | NM_001003950 | 5.96056e-008 | 1.60954 | E15.5 * Wnt1 up vs E15.5 * Ctrl |
| 10525236 | AU042671      | BC051044     | 6.74365e-006 | 1.60752 | E15.5 * Wnt1 up vs E15.5 * Ctrl |
| 10549842 | Zfp667        | NM_001024928 | 5.83327e-005 | 1.60719 | E15.5 * Wnt1 up vs E15.5 * Ctrl |
| 10472370 | Scn2a1        | NM_001099298 | 0.000360211  | 1.60716 | E15.5 * Wnt1 up vs E15.5 * Ctrl |
| 10594221 | Lrrc49        | NM_145616    | 1.64082e-006 | 1.60685 | E15.5 * Wnt1 up vs E15.5 * Ctrl |
| 10563899 | ---           | ---          | 4.51244e-010 | 1.60628 | E15.5 * Wnt1 up vs E15.5 * Ctrl |
| 10608288 | ---           | ---          | 2.95067e-006 | 1.60616 | E15.5 * Wnt1 up vs E15.5 * Ctrl |
| 10608300 | ---           | ---          | 2.95067e-006 | 1.60616 | E15.5 * Wnt1 up vs E15.5 * Ctrl |
| 10407337 | Hcn1          | NM_010408    | 0.0130929    | 1.60601 | E15.5 * Wnt1 up vs E15.5 * Ctrl |
| 10461237 | Bscl2         | NM_001136064 | 1.34052e-006 | 1.6058  | E15.5 * Wnt1 up vs E15.5 * Ctrl |
| 10568948 | Sprn          | NM_183147    | 2.38407e-005 | 1.60522 | E15.5 * Wnt1 up vs E15.5 * Ctrl |
| 10561777 | BC027344      | BC027344     | 0.000652625  | 1.60507 | E15.5 * Wnt1 up vs E15.5 * Ctrl |

|          |               |              |              |         |                                 |
|----------|---------------|--------------|--------------|---------|---------------------------------|
| 10373388 | Obfc2b        | NM_027257    | 0.000101974  | 1.60478 | E15.5 * Wnt1 up vs E15.5 * Ctrl |
| 10377215 | Gas7          | NM_008088    | 2.72054e-007 | 1.60465 | E15.5 * Wnt1 up vs E15.5 * Ctrl |
| 10557481 | Ypel3         | NM_026875    | 6.14477e-007 | 1.6042  | E15.5 * Wnt1 up vs E15.5 * Ctrl |
| 10535053 | Prkar1b       | NM_008923    | 7.03318e-006 | 1.6034  | E15.5 * Wnt1 up vs E15.5 * Ctrl |
| 10451303 | Ttbk1         | ENSMUST00000 | 0.000148267  | 1.60304 | E15.5 * Wnt1 up vs E15.5 * Ctrl |
| 10421709 | EG629678      | NM_001037935 | 2.17562e-005 | 1.60304 | E15.5 * Wnt1 up vs E15.5 * Ctrl |
| 10570388 | Fam70b        | NM_001143671 | 2.51951e-006 | 1.60278 | E15.5 * Wnt1 up vs E15.5 * Ctrl |
| 10565089 | Cpeb1         | NM_007755    | 4.80168e-006 | 1.6018  | E15.5 * Wnt1 up vs E15.5 * Ctrl |
| 10565530 | ---           | ---          | 0.00119462   | 1.60134 | E15.5 * Wnt1 up vs E15.5 * Ctrl |
| 10475027 | Tyro3         | NM_019392    | 3.62785e-008 | 1.60101 | E15.5 * Wnt1 up vs E15.5 * Ctrl |
| 10436692 | ENSMUSG00000  | ENSMUST00000 | 0.00100923   | 1.6001  | E15.5 * Wnt1 up vs E15.5 * Ctrl |
| 10593293 | Ncam1         | NM_001081445 | 1.9031e-005  | 1.59971 | E15.5 * Wnt1 up vs E15.5 * Ctrl |
| 10408762 | Eef1e1        | NM_025380    | 0.00168316   | 1.59881 | E15.5 * Wnt1 up vs E15.5 * Ctrl |
| 10357220 | Tmem177       | NM_175106    | 0.00081737   | 1.59856 | E15.5 * Wnt1 up vs E15.5 * Ctrl |
| 10437590 | Carhsp1       | NM_025821    | 9.88668e-008 | 1.59812 | E15.5 * Wnt1 up vs E15.5 * Ctrl |
| 10529957 | Gpr125        | ENSMUST00000 | 1.20088e-006 | 1.59762 | E15.5 * Wnt1 up vs E15.5 * Ctrl |
| 10425267 | Pick1         | NM_008837    | 2.19221e-005 | 1.59674 | E15.5 * Wnt1 up vs E15.5 * Ctrl |
| 10545780 | Exoc6b        | NM_177077    | 8.69708e-007 | 1.59649 | E15.5 * Wnt1 up vs E15.5 * Ctrl |
| 10478943 | Pfdn4         | NM_001013369 | 0.0015255    | 1.59578 | E15.5 * Wnt1 up vs E15.5 * Ctrl |
| 10385656 | Zfp2          | NM_001044697 | 2.95971e-005 | 1.59512 | E15.5 * Wnt1 up vs E15.5 * Ctrl |
| 10523297 | Ccng2         | NM_007635    | 1.40963e-005 | 1.59476 | E15.5 * Wnt1 up vs E15.5 * Ctrl |
| 10408610 | Tubb2a        | NM_009450    | 8.73849e-007 | 1.59405 | E15.5 * Wnt1 up vs E15.5 * Ctrl |
| 10446739 | Clip4         | NM_030179    | 4.71924e-005 | 1.5936  | E15.5 * Wnt1 up vs E15.5 * Ctrl |
| 10447490 | Pja2          | NM_001025309 | 1.70077e-008 | 1.59318 | E15.5 * Wnt1 up vs E15.5 * Ctrl |
| 10400803 | ---           | ---          | 0.00867209   | 1.59302 | E15.5 * Wnt1 up vs E15.5 * Ctrl |
| 10447354 | Txndc14       | NM_025868    | 1.83993e-005 | 1.593   | E15.5 * Wnt1 up vs E15.5 * Ctrl |
| 10345715 | Map4k4        | NM_008696    | 4.52219e-007 | 1.5927  | E15.5 * Wnt1 up vs E15.5 * Ctrl |
| 10455054 | Pcdhb3        | NM_053128    | 0.00122786   | 1.59254 | E15.5 * Wnt1 up vs E15.5 * Ctrl |
| 10392415 | Rgs9          | NM_011268    | 0.000140317  | 1.59158 | E15.5 * Wnt1 up vs E15.5 * Ctrl |
| 10538732 | Grid2         | NM_008167    | 0.000248128  | 1.59157 | E15.5 * Wnt1 up vs E15.5 * Ctrl |
| 10553450 | Nell1         | NM_001037906 | 0.00055      | 1.59098 | E15.5 * Wnt1 up vs E15.5 * Ctrl |
| 10386388 | Snap47        | NM_144521    | 1.45336e-005 | 1.59085 | E15.5 * Wnt1 up vs E15.5 * Ctrl |
| 10368918 | Sobp          | NM_175407    | 2.05796e-006 | 1.59075 | E15.5 * Wnt1 up vs E15.5 * Ctrl |
| 10594315 | Fem1b         | NM_010193    | 2.36724e-010 | 1.58943 | E15.5 * Wnt1 up vs E15.5 * Ctrl |
| 10563897 | ---           | ---          | 0.000303465  | 1.58926 | E15.5 * Wnt1 up vs E15.5 * Ctrl |
| 10493377 | ---           | ---          | 4.86867e-005 | 1.58842 | E15.5 * Wnt1 up vs E15.5 * Ctrl |
| 10441565 | Rps6ka2       | NM_011299    | 1.51513e-005 | 1.58727 | E15.5 * Wnt1 up vs E15.5 * Ctrl |
| 10363962 | Gnaz          | NM_010311    | 6.49535e-005 | 1.58719 | E15.5 * Wnt1 up vs E15.5 * Ctrl |
| 10425012 | Zfp7          | NM_145916    | 0.000122065  | 1.58647 | E15.5 * Wnt1 up vs E15.5 * Ctrl |
| 10438358 | 05-Sep        | NM_213614    | 8.78387e-008 | 1.58639 | E15.5 * Wnt1 up vs E15.5 * Ctrl |
| 10503835 | Rragd         | NM_027491    | 2.25994e-005 | 1.58624 | E15.5 * Wnt1 up vs E15.5 * Ctrl |
| 10429203 | Fam135b       | NM_177819    | 0.000315202  | 1.5858  | E15.5 * Wnt1 up vs E15.5 * Ctrl |
| 10429220 | Fam135b       | NM_177819    | 0.00305403   | 1.58579 | E15.5 * Wnt1 up vs E15.5 * Ctrl |
| 10569280 | Dusp8         | NM_008748    | 0.00011093   | 1.58553 | E15.5 * Wnt1 up vs E15.5 * Ctrl |
| 10505922 | ---           | ---          | 3.18299e-005 | 1.58489 | E15.5 * Wnt1 up vs E15.5 * Ctrl |
| 10565292 | Arnt2         | NM_007488    | 5.09056e-005 | 1.58429 | E15.5 * Wnt1 up vs E15.5 * Ctrl |
| 10421648 | Slc25a30      | NM_026232    | 2.70279e-006 | 1.58317 | E15.5 * Wnt1 up vs E15.5 * Ctrl |
| 10399505 | Greb1         | NM_015764    | 0.000163613  | 1.58299 | E15.5 * Wnt1 up vs E15.5 * Ctrl |
| 10399973 | Hdac9         | NM_024124    | 1.93373e-006 | 1.58286 | E15.5 * Wnt1 up vs E15.5 * Ctrl |
| 10534966 | Zfp113        | NM_019747    | 4.04374e-006 | 1.58245 | E15.5 * Wnt1 up vs E15.5 * Ctrl |
| 10555414 | Rab6          | NM_024287    | 2.00464e-006 | 1.58212 | E15.5 * Wnt1 up vs E15.5 * Ctrl |
| 10372005 | Vezt          | NM_172538    | 3.6408e-005  | 1.58207 | E15.5 * Wnt1 up vs E15.5 * Ctrl |
| 10472162 | Gpd2          | NM_010274    | 1.45027e-005 | 1.58204 | E15.5 * Wnt1 up vs E15.5 * Ctrl |
| 10408024 | Pgbd1         | BC089360     | 6.95765e-005 | 1.58178 | E15.5 * Wnt1 up vs E15.5 * Ctrl |
| 10599537 | Slc25a14      | NM_011398    | 0.000590158  | 1.58101 | E15.5 * Wnt1 up vs E15.5 * Ctrl |
| 10504534 | Frmpd1        | NM_001081172 | 0.000313834  | 1.58059 | E15.5 * Wnt1 up vs E15.5 * Ctrl |
| 10503643 | Ndufaf4       | NM_026742    | 3.33399e-007 | 1.58006 | E15.5 * Wnt1 up vs E15.5 * Ctrl |
| 10484894 | Ptprj         | NM_008982    | 0.000120949  | 1.57986 | E15.5 * Wnt1 up vs E15.5 * Ctrl |
| 10388310 | Garnl4        | NM_001015046 | 0.000121984  | 1.57962 | E15.5 * Wnt1 up vs E15.5 * Ctrl |
| 10578572 | Stox2         | NM_001114311 | 3.53645e-005 | 1.57938 | E15.5 * Wnt1 up vs E15.5 * Ctrl |
| 10433077 | Smug1         | NM_027885    | 0.000131189  | 1.57832 | E15.5 * Wnt1 up vs E15.5 * Ctrl |
| 10460157 | Cpt1a         | NM_013495    | 4.95905e-006 | 1.57703 | E15.5 * Wnt1 up vs E15.5 * Ctrl |
| 10506296 | ---           | ---          | 0.000691538  | 1.57654 | E15.5 * Wnt1 up vs E15.5 * Ctrl |
| 10431140 | 1810041L15Rik | BC062953     | 9.33486e-005 | 1.57608 | E15.5 * Wnt1 up vs E15.5 * Ctrl |
| 10603166 | Trappc2       | NM_025432    | 0.00318581   | 1.57565 | E15.5 * Wnt1 up vs E15.5 * Ctrl |
| 10374202 | Adcy1         | NM_009622    | 3.53614e-006 | 1.57539 | E15.5 * Wnt1 up vs E15.5 * Ctrl |

|          |               |              |              |         |                                 |
|----------|---------------|--------------|--------------|---------|---------------------------------|
| 10518226 | Vps13d        | BC038488     | 0.00127028   | 1.57478 | E15.5 * Wnt1 up vs E15.5 * Ctrl |
| 10457536 | Ankrd29       | ENSMUST00000 | 5.65159e-005 | 1.57451 | E15.5 * Wnt1 up vs E15.5 * Ctrl |
| 10464030 | Adra2a        | NM_007417    | 4.35753e-005 | 1.57392 | E15.5 * Wnt1 up vs E15.5 * Ctrl |
| 10484431 | Txndc14       | NM_025868    | 1.72373e-005 | 1.57377 | E15.5 * Wnt1 up vs E15.5 * Ctrl |
| 10536827 | Ccdc136       | BC006583     | 2.81687e-007 | 1.57372 | E15.5 * Wnt1 up vs E15.5 * Ctrl |
| 10462683 | Pcgf5         | NM_029508    | 0.000703326  | 1.57364 | E15.5 * Wnt1 up vs E15.5 * Ctrl |
| 10554712 | 2610206C17Rik | AK011897     | 2.24514e-005 | 1.57358 | E15.5 * Wnt1 up vs E15.5 * Ctrl |
| 10433163 | Ppp1r1a       | NM_021391    | 8.33086e-006 | 1.57355 | E15.5 * Wnt1 up vs E15.5 * Ctrl |
| 10442914 | 0610011F06Rik | NM_026686    | 3.48182e-006 | 1.57248 | E15.5 * Wnt1 up vs E15.5 * Ctrl |
| 10410778 | Gpr98         | NM_054053    | 5.53947e-010 | 1.5721  | E15.5 * Wnt1 up vs E15.5 * Ctrl |
| 10399854 | Slc26a4       | NM_011867    | 2.40406e-005 | 1.57139 | E15.5 * Wnt1 up vs E15.5 * Ctrl |
| 10448925 | Cacna1h       | NM_021415    | 0.00019356   | 1.57134 | E15.5 * Wnt1 up vs E15.5 * Ctrl |
| 10518947 | Ajap1         | NM_001099299 | 6.81154e-005 | 1.57124 | E15.5 * Wnt1 up vs E15.5 * Ctrl |
| 10498204 | ENSMUSG00000  | ENSMUST00000 | 0.000486993  | 1.57088 | E15.5 * Wnt1 up vs E15.5 * Ctrl |
| 10563387 | EG545963      | NM_001033792 | 0.00654564   | 1.5707  | E15.5 * Wnt1 up vs E15.5 * Ctrl |
| 10563643 | Tsg101        | NM_021884    | 0.000907953  | 1.57012 | E15.5 * Wnt1 up vs E15.5 * Ctrl |
| 10369525 | 2010107G23Rik | NM_027251    | 4.28279e-005 | 1.56989 | E15.5 * Wnt1 up vs E15.5 * Ctrl |
| 10528484 | Srpk2         | NM_009274    | 5.79668e-007 | 1.56942 | E15.5 * Wnt1 up vs E15.5 * Ctrl |
| 10384064 | Camk2b        | NM_007595    | 4.87285e-008 | 1.56932 | E15.5 * Wnt1 up vs E15.5 * Ctrl |
| 10581188 | 4931428F04Rik | BC043046     | 1.74844e-005 | 1.5685  | E15.5 * Wnt1 up vs E15.5 * Ctrl |
| 10413255 | Duxbl         | NM_183389    | 0.000180638  | 1.56849 | E15.5 * Wnt1 up vs E15.5 * Ctrl |
| 10413265 | Duxbl         | NM_183389    | 0.000180638  | 1.56849 | E15.5 * Wnt1 up vs E15.5 * Ctrl |
| 10505911 | Dmrt1         | NM_175647    | 0.000455935  | 1.56711 | E15.5 * Wnt1 up vs E15.5 * Ctrl |
| 10436788 | Hunk          | NM_015755    | 9.19356e-006 | 1.56638 | E15.5 * Wnt1 up vs E15.5 * Ctrl |
| 10525542 | Bcl7a         | NM_029850    | 4.21121e-005 | 1.56589 | E15.5 * Wnt1 up vs E15.5 * Ctrl |
| 10405757 | 2010111I01Rik | NM_028079    | 1.00419e-005 | 1.56546 | E15.5 * Wnt1 up vs E15.5 * Ctrl |
| 10391454 | Vat1          | NM_012037    | 0.00029829   | 1.56524 | E15.5 * Wnt1 up vs E15.5 * Ctrl |
| 10419999 | Jph4          | NM_177049    | 8.05343e-006 | 1.5648  | E15.5 * Wnt1 up vs E15.5 * Ctrl |
| 10383575 | Tbcd          | NM_029878    | 5.03177e-008 | 1.56424 | E15.5 * Wnt1 up vs E15.5 * Ctrl |
| 10457780 | Fam59a        | NM_001033445 | 7.33161e-006 | 1.56362 | E15.5 * Wnt1 up vs E15.5 * Ctrl |
| 10591200 | EG624341      | XM_888877    | 0.0129635    | 1.5635  | E15.5 * Wnt1 up vs E15.5 * Ctrl |
| 10391987 | ---           | ---          | 4.17441e-007 | 1.5629  | E15.5 * Wnt1 up vs E15.5 * Ctrl |
| 10520351 | B930011P16Rik | NM_207282    | 0.00103224   | 1.56277 | E15.5 * Wnt1 up vs E15.5 * Ctrl |
| 10500327 | Hist2h3c2     | NM_054045    | 0.0124518    | 1.56264 | E15.5 * Wnt1 up vs E15.5 * Ctrl |
| 10389581 | Ypel2         | NM_001005341 | 3.72531e-006 | 1.56226 | E15.5 * Wnt1 up vs E15.5 * Ctrl |
| 10430389 | Mfng          | NM_008595    | 1.96055e-005 | 1.56136 | E15.5 * Wnt1 up vs E15.5 * Ctrl |
| 10406456 | AY512938      | AY512938     | 0.00827236   | 1.56122 | E15.5 * Wnt1 up vs E15.5 * Ctrl |
| 10372383 | Zdhhc17       | BC051527     | 5.68209e-005 | 1.56113 | E15.5 * Wnt1 up vs E15.5 * Ctrl |
| 10471882 | Olfrml2a      | NM_172854    | 2.4898e-006  | 1.56059 | E15.5 * Wnt1 up vs E15.5 * Ctrl |
| 10456522 | Tcf4          | NM_013685    | 1.36251e-008 | 1.56046 | E15.5 * Wnt1 up vs E15.5 * Ctrl |
| 10522658 | C530008M17Rik | ENSMUST00000 | 0.000286588  | 1.56039 | E15.5 * Wnt1 up vs E15.5 * Ctrl |
| 10500876 | Lrig2         | NM_001025067 | 0.000138593  | 1.56022 | E15.5 * Wnt1 up vs E15.5 * Ctrl |
| 10603151 | Gpm6b         | NM_023122    | 1.54195e-006 | 1.55853 | E15.5 * Wnt1 up vs E15.5 * Ctrl |
| 10397651 | Spata7        | NM_178914    | 0.00111174   | 1.55835 | E15.5 * Wnt1 up vs E15.5 * Ctrl |
| 10565873 | Ppme1         | NM_028292    | 0.000533429  | 1.55784 | E15.5 * Wnt1 up vs E15.5 * Ctrl |
| 10367546 | Oprm1         | NM_001039652 | 7.95402e-006 | 1.55774 | E15.5 * Wnt1 up vs E15.5 * Ctrl |
| 10600797 | Apoo-ps       | NR_004438    | 4.78541e-005 | 1.55764 | E15.5 * Wnt1 up vs E15.5 * Ctrl |
| 10422244 | Slitrk6       | NM_175499    | 0.000205509  | 1.55685 | E15.5 * Wnt1 up vs E15.5 * Ctrl |
| 10408450 | Sox4          | NM_009238    | 0.000462463  | 1.55671 | E15.5 * Wnt1 up vs E15.5 * Ctrl |
| 10455080 | Pcdhb9        | NM_053134    | 0.0122508    | 1.5564  | E15.5 * Wnt1 up vs E15.5 * Ctrl |
| 10511901 | Ankrd6        | NM_001012450 | 6.68649e-007 | 1.55622 | E15.5 * Wnt1 up vs E15.5 * Ctrl |
| 10499514 | Trim46        | NM_183037    | 9.77322e-006 | 1.55551 | E15.5 * Wnt1 up vs E15.5 * Ctrl |
| 10604038 | Sfrs17b       | NM_001081956 | 0.000107584  | 1.55528 | E15.5 * Wnt1 up vs E15.5 * Ctrl |
| 10409240 | Sema4d        | NM_013660    | 3.08245e-007 | 1.55521 | E15.5 * Wnt1 up vs E15.5 * Ctrl |
| 10520096 | Klhl7         | NM_026448    | 2.62964e-005 | 1.55488 | E15.5 * Wnt1 up vs E15.5 * Ctrl |
| 10445373 | B230354K17Rik | ENSMUST00000 | 0.00063974   | 1.55424 | E15.5 * Wnt1 up vs E15.5 * Ctrl |
| 10372385 | Zdhhc17       | NM_172554    | 4.06232e-006 | 1.55417 | E15.5 * Wnt1 up vs E15.5 * Ctrl |
| 10361828 | Cited2        | NM_010828    | 4.66733e-006 | 1.55408 | E15.5 * Wnt1 up vs E15.5 * Ctrl |
| 10375973 | Taf13         | NM_025444    | 1.56421e-005 | 1.55407 | E15.5 * Wnt1 up vs E15.5 * Ctrl |
| 10587012 | Ccpg1         | NM_001114328 | 4.16554e-006 | 1.55403 | E15.5 * Wnt1 up vs E15.5 * Ctrl |
| 10497673 | Zmat3         | NM_009517    | 0.000174694  | 1.5537  | E15.5 * Wnt1 up vs E15.5 * Ctrl |
| 10514892 | 2210012G02Rik | NM_025617    | 0.0014565    | 1.55346 | E15.5 * Wnt1 up vs E15.5 * Ctrl |
| 10455292 | 2900055J20Rik | ENSMUST00000 | 0.000204456  | 1.55332 | E15.5 * Wnt1 up vs E15.5 * Ctrl |
| 10601303 | Chic1         | NM_009767    | 0.000597946  | 1.55289 | E15.5 * Wnt1 up vs E15.5 * Ctrl |
| 10600249 | Plxnb3        | NM_019587    | 7.82158e-006 | 1.5516  | E15.5 * Wnt1 up vs E15.5 * Ctrl |
| 10423791 | 4930447A16Rik | ENSMUST00000 | 0.00286573   | 1.55142 | E15.5 * Wnt1 up vs E15.5 * Ctrl |

|          |               |              |              |         |                                 |
|----------|---------------|--------------|--------------|---------|---------------------------------|
| 10503876 | RP23-12I24.6  | NM_177774    | 3.62912e-005 | 1.5512  | E15.5 * Wnt1 up vs E15.5 * Ctrl |
| 10501860 | Fnbp1l        | NM_001114665 | 2.961e-009   | 1.5511  | E15.5 * Wnt1 up vs E15.5 * Ctrl |
| 10554323 | ---           | ---          | 0.000342291  | 1.55088 | E15.5 * Wnt1 up vs E15.5 * Ctrl |
| 10475957 | Ttl           | NM_027192    | 4.68627e-005 | 1.55084 | E15.5 * Wnt1 up vs E15.5 * Ctrl |
| 10409118 | Wnk2          | NM_029361    | 4.4421e-009  | 1.55055 | E15.5 * Wnt1 up vs E15.5 * Ctrl |
| 10555205 | Gdpd5         | NM_201352    | 0.00019785   | 1.55046 | E15.5 * Wnt1 up vs E15.5 * Ctrl |
| 10472820 | Itga6         | NM_008397    | 5.08639e-005 | 1.55029 | E15.5 * Wnt1 up vs E15.5 * Ctrl |
| 10535065 | Adap1         | NM_172723    | 3.93399e-005 | 1.54886 | E15.5 * Wnt1 up vs E15.5 * Ctrl |
| 10480878 | Camsap1       | NM_001115076 | 1.73956e-006 | 1.54863 | E15.5 * Wnt1 up vs E15.5 * Ctrl |
| 10532709 | ---           | ---          | 0.00457109   | 1.54859 | E15.5 * Wnt1 up vs E15.5 * Ctrl |
| 10355162 | Plekhm3       | NM_001039493 | 0.000398134  | 1.5471  | E15.5 * Wnt1 up vs E15.5 * Ctrl |
| 10552030 | C630016N16Rik | AK049951     | 9.65289e-005 | 1.54703 | E15.5 * Wnt1 up vs E15.5 * Ctrl |
| 10360460 | Chml          | NM_021350    | 0.000368164  | 1.54677 | E15.5 * Wnt1 up vs E15.5 * Ctrl |
| 10597531 | Rbms3         | NM_178660    | 7.78489e-008 | 1.54675 | E15.5 * Wnt1 up vs E15.5 * Ctrl |
| 10438478 | Abcc5         | NM_013790    | 2.11556e-007 | 1.54618 | E15.5 * Wnt1 up vs E15.5 * Ctrl |
| 10415766 | Sacs          | NM_172809    | 2.12618e-006 | 1.54497 | E15.5 * Wnt1 up vs E15.5 * Ctrl |
| 10472694 | 4933404M02Rik | NM_025744    | 2.79822e-005 | 1.54485 | E15.5 * Wnt1 up vs E15.5 * Ctrl |
| 10458247 | Lrrtm2        | NM_178005    | 0.000211435  | 1.54458 | E15.5 * Wnt1 up vs E15.5 * Ctrl |
| 10501374 | 5330417C22Rik | NM_001033304 | 2.41278e-006 | 1.54456 | E15.5 * Wnt1 up vs E15.5 * Ctrl |
| 10397575 | Nrxn3         | NM_172544    | 3.39583e-005 | 1.544   | E15.5 * Wnt1 up vs E15.5 * Ctrl |
| 10384183 | AB182283      | NM_001081652 | 2.80633e-007 | 1.54374 | E15.5 * Wnt1 up vs E15.5 * Ctrl |
| 10526181 | Gatsl2        | NM_030719    | 1.83797e-005 | 1.54336 | E15.5 * Wnt1 up vs E15.5 * Ctrl |
| 10555063 | Ints4         | NM_027256    | 4.07192e-007 | 1.54295 | E15.5 * Wnt1 up vs E15.5 * Ctrl |
| 10543249 | EG232599      | ENSMUST00000 | 0.00330379   | 1.54255 | E15.5 * Wnt1 up vs E15.5 * Ctrl |
| 10574676 | Nol3          | NM_030152    | 4.48238e-005 | 1.54231 | E15.5 * Wnt1 up vs E15.5 * Ctrl |
| 10593799 | Scaper        | NM_001081341 | 1.47037e-006 | 1.54214 | E15.5 * Wnt1 up vs E15.5 * Ctrl |
| 10376163 | Rapgef6       | NM_175258    | 2.85711e-008 | 1.542   | E15.5 * Wnt1 up vs E15.5 * Ctrl |
| 10571207 | Dusp26        | NM_025869    | 0.000223656  | 1.5418  | E15.5 * Wnt1 up vs E15.5 * Ctrl |
| 10557705 | Phkg2         | NM_026888    | 5.12972e-006 | 1.54047 | E15.5 * Wnt1 up vs E15.5 * Ctrl |
| 10588083 | Faim          | NM_001122851 | 0.000101536  | 1.5404  | E15.5 * Wnt1 up vs E15.5 * Ctrl |
| 10447732 | Pacrg         | NM_027032    | 0.00135011   | 1.54038 | E15.5 * Wnt1 up vs E15.5 * Ctrl |
| 10579799 | Tmem184c      | NM_145599    | 9.26586e-006 | 1.54003 | E15.5 * Wnt1 up vs E15.5 * Ctrl |
| 10415576 | Zmym2         | NM_029498    | 4.55997e-007 | 1.53964 | E15.5 * Wnt1 up vs E15.5 * Ctrl |
| 10441706 | 1700010I14Rik | NM_025851    | 0.000180066  | 1.53957 | E15.5 * Wnt1 up vs E15.5 * Ctrl |
| 10544114 | Hipk2         | NM_010433    | 8.26419e-007 | 1.53921 | E15.5 * Wnt1 up vs E15.5 * Ctrl |
| 10432129 | Olfr288       | NM_001011733 | 0.000730545  | 1.53859 | E15.5 * Wnt1 up vs E15.5 * Ctrl |
| 10487748 | 4930402H24Rik | BC052447     | 7.60584e-007 | 1.53759 | E15.5 * Wnt1 up vs E15.5 * Ctrl |
| 10463140 | Lcor          | NM_172154    | 9.65872e-008 | 1.53702 | E15.5 * Wnt1 up vs E15.5 * Ctrl |
| 10540227 | Kbtbd8        | NM_001008785 | 0.00425193   | 1.53602 | E15.5 * Wnt1 up vs E15.5 * Ctrl |
| 10590298 | Eif1b         | NM_026892    | 7.6168e-006  | 1.53567 | E15.5 * Wnt1 up vs E15.5 * Ctrl |
| 10373218 | Nxph4         | NM_183297    | 0.000201023  | 1.53543 | E15.5 * Wnt1 up vs E15.5 * Ctrl |
| 10370651 | BC005764      | NM_181681    | 2.64424e-005 | 1.53539 | E15.5 * Wnt1 up vs E15.5 * Ctrl |
| 10413220 | ENSMUSG0000C  | ENSMUST00000 | 0.000138249  | 1.53529 | E15.5 * Wnt1 up vs E15.5 * Ctrl |
| 10505512 | Trim32        | NM_053084    | 2.08187e-005 | 1.53505 | E15.5 * Wnt1 up vs E15.5 * Ctrl |
| 10516393 | Eif2c4        | NM_153177    | 7.94103e-005 | 1.53465 | E15.5 * Wnt1 up vs E15.5 * Ctrl |
| 10571747 | ---           | ---          | 0.0137283    | 1.53453 | E15.5 * Wnt1 up vs E15.5 * Ctrl |
| 10394627 | Nbas          | BC057020     | 8.02887e-008 | 1.53451 | E15.5 * Wnt1 up vs E15.5 * Ctrl |
| 10583179 | Pgr           | NM_008829    | 3.95118e-005 | 1.53357 | E15.5 * Wnt1 up vs E15.5 * Ctrl |
| 10517373 | Rcan3         | NM_022980    | 3.78311e-008 | 1.53355 | E15.5 * Wnt1 up vs E15.5 * Ctrl |
| 10522265 | Slc30a9       | NM_178651    | 1.24915e-005 | 1.53331 | E15.5 * Wnt1 up vs E15.5 * Ctrl |
| 10376425 | OTTMUSG00000  | ENSMUST00000 | 0.00288691   | 1.53306 | E15.5 * Wnt1 up vs E15.5 * Ctrl |
| 10566067 | Rnf121        | NM_029211    | 0.00034524   | 1.53278 | E15.5 * Wnt1 up vs E15.5 * Ctrl |
| 10601844 | Bhlhb9        | NM_198161    | 0.000395209  | 1.5327  | E15.5 * Wnt1 up vs E15.5 * Ctrl |
| 10542555 | MGC7817       | BC006653     | 0.00173551   | 1.53263 | E15.5 * Wnt1 up vs E15.5 * Ctrl |
| 10563921 | ---           | ---          | 2.93602e-008 | 1.53221 | E15.5 * Wnt1 up vs E15.5 * Ctrl |
| 10563925 | ---           | ---          | 2.93602e-008 | 1.53221 | E15.5 * Wnt1 up vs E15.5 * Ctrl |
| 10540544 | Thumpd3       | NM_008188    | 1.55989e-006 | 1.53203 | E15.5 * Wnt1 up vs E15.5 * Ctrl |
| 10553501 | Slc17a6       | NM_080853    | 0.000596306  | 1.53174 | E15.5 * Wnt1 up vs E15.5 * Ctrl |
| 10605616 | Il1rap1       | BC119580     | 0.000559364  | 1.53098 | E15.5 * Wnt1 up vs E15.5 * Ctrl |
| 10363161 | 6330442E10Rik | BC079613     | 0.00537721   | 1.53092 | E15.5 * Wnt1 up vs E15.5 * Ctrl |
| 10573483 | Prdx2         | NM_011563    | 7.38999e-008 | 1.53088 | E15.5 * Wnt1 up vs E15.5 * Ctrl |
| 10438702 | St6gal1       | NM_145933    | 0.00100197   | 1.53046 | E15.5 * Wnt1 up vs E15.5 * Ctrl |
| 10437655 | Fam18a        | BC068110     | 0.00223001   | 1.53037 | E15.5 * Wnt1 up vs E15.5 * Ctrl |
| 10582743 | Pcnx12        | NM_175561    | 1.64305e-005 | 1.52958 | E15.5 * Wnt1 up vs E15.5 * Ctrl |
| 10601848 | 6530401D17Rik | NR_003641    | 0.00707568   | 1.52922 | E15.5 * Wnt1 up vs E15.5 * Ctrl |
| 10442236 | 3110052M02Rik | ENSMUST00000 | 0.0133351    | 1.5289  | E15.5 * Wnt1 up vs E15.5 * Ctrl |

|          |               |               |              |         |                                 |
|----------|---------------|---------------|--------------|---------|---------------------------------|
| 10423805 | Atp6v1c1      | NM_025494     | 1.9927e-005  | 1.5285  | E15.5 * Wnt1 up vs E15.5 * Ctrl |
| 10417124 | B930095G15Rik | BC096543      | 3.75543e-007 | 1.52831 | E15.5 * Wnt1 up vs E15.5 * Ctrl |
| 10498710 | Bche          | NM_009738     | 0.000663974  | 1.52821 | E15.5 * Wnt1 up vs E15.5 * Ctrl |
| 10381416 | Rnd2          | NM_009708     | 0.000311169  | 1.52709 | E15.5 * Wnt1 up vs E15.5 * Ctrl |
| 10412100 | Map3k1        | NM_011945     | 0.000136376  | 1.52687 | E15.5 * Wnt1 up vs E15.5 * Ctrl |
| 10604505 | 6720401G13Rik | NR_015505     | 1.08418e-005 | 1.52662 | E15.5 * Wnt1 up vs E15.5 * Ctrl |
| 10593492 | Zc3h12c       | AK220416      | 3.3749e-007  | 1.52633 | E15.5 * Wnt1 up vs E15.5 * Ctrl |
| 10460010 | Galr1         | NM_008082     | 0.00177518   | 1.52629 | E15.5 * Wnt1 up vs E15.5 * Ctrl |
| 10461844 | Gnaq          | NM_008139     | 9.17707e-006 | 1.52626 | E15.5 * Wnt1 up vs E15.5 * Ctrl |
| 10415952 | ---           | ---           | 0.0110517    | 1.52624 | E15.5 * Wnt1 up vs E15.5 * Ctrl |
| 10576288 | Spire2        | NM_172287     | 1.53275e-005 | 1.52613 | E15.5 * Wnt1 up vs E15.5 * Ctrl |
| 10352920 | Xkr4          | NM_001011874  | 3.54586e-005 | 1.52539 | E15.5 * Wnt1 up vs E15.5 * Ctrl |
| 10452516 | Ankrd12       | NM_001025572  | 0.000699137  | 1.52484 | E15.5 * Wnt1 up vs E15.5 * Ctrl |
| 10581493 | Pdxd          | NM_020271     | 0.00027502   | 1.52484 | E15.5 * Wnt1 up vs E15.5 * Ctrl |
| 10369752 | Lrrtm3        | NM_178678     | 0.000846468  | 1.5248  | E15.5 * Wnt1 up vs E15.5 * Ctrl |
| 10543369 | Cadps2        | NM_153163     | 1.78305e-006 | 1.52471 | E15.5 * Wnt1 up vs E15.5 * Ctrl |
| 10428238 | Ubr5          | NM_001081359  | 2.38673e-007 | 1.52456 | E15.5 * Wnt1 up vs E15.5 * Ctrl |
| 10551828 | EG330503      | NM_001033540  | 2.79011e-005 | 1.52455 | E15.5 * Wnt1 up vs E15.5 * Ctrl |
| 10356626 | ---           | ---           | 0.000318869  | 1.52409 | E15.5 * Wnt1 up vs E15.5 * Ctrl |
| 10568668 | Adam12        | NM_007400     | 0.00020619   | 1.52389 | E15.5 * Wnt1 up vs E15.5 * Ctrl |
| 10596200 | Tmem108       | NM_178638     | 0.0120743    | 1.52388 | E15.5 * Wnt1 up vs E15.5 * Ctrl |
| 10396306 | 1200003C05Rik | NM_024205     | 1.01841e-005 | 1.52319 | E15.5 * Wnt1 up vs E15.5 * Ctrl |
| 10585180 | Ncam1         | BC011310      | 0.00192873   | 1.52254 | E15.5 * Wnt1 up vs E15.5 * Ctrl |
| 10455108 | Pcdhb16       | NM_053141     | 0.0131389    | 1.52175 | E15.5 * Wnt1 up vs E15.5 * Ctrl |
| 10517616 | Vwa5b1        | NM_029401     | 3.58346e-005 | 1.52171 | E15.5 * Wnt1 up vs E15.5 * Ctrl |
| 10533007 | Ccdc64        | NM_001080808  | 7.72773e-007 | 1.52155 | E15.5 * Wnt1 up vs E15.5 * Ctrl |
| 10401160 | 6330442E10Rik | BC066067      | 0.00294792   | 1.5211  | E15.5 * Wnt1 up vs E15.5 * Ctrl |
| 10501567 | Rnpc3         | NM_001038696  | 7.40856e-006 | 1.52101 | E15.5 * Wnt1 up vs E15.5 * Ctrl |
| 10479685 | Oprl1         | NM_011012     | 7.57649e-005 | 1.52088 | E15.5 * Wnt1 up vs E15.5 * Ctrl |
| 10422238 | EG668761      | ENSMUST000000 | 0.000288583  | 1.51977 | E15.5 * Wnt1 up vs E15.5 * Ctrl |
| 10516046 | ---           | ---           | 0.000612438  | 1.51943 | E15.5 * Wnt1 up vs E15.5 * Ctrl |
| 10504218 | Dnajb5        | NM_019874     | 0.000151301  | 1.51922 | E15.5 * Wnt1 up vs E15.5 * Ctrl |
| 10365817 | Ntn4          | NM_021320     | 0.000194287  | 1.51905 | E15.5 * Wnt1 up vs E15.5 * Ctrl |
| 10412466 | Hmgcs1        | NM_145942     | 1.58445e-005 | 1.51897 | E15.5 * Wnt1 up vs E15.5 * Ctrl |
| 10409365 | Gprin1        | NM_012014     | 7.97055e-006 | 1.51882 | E15.5 * Wnt1 up vs E15.5 * Ctrl |
| 10558468 | Jakmip3       | BC119557      | 0.000198913  | 1.51879 | E15.5 * Wnt1 up vs E15.5 * Ctrl |
| 10353258 | 4930444P10Rik | ENSMUST000000 | 0.000150106  | 1.51875 | E15.5 * Wnt1 up vs E15.5 * Ctrl |
| 10422015 | Mycbp2        | NM_207215     | 8.01981e-008 | 1.51822 | E15.5 * Wnt1 up vs E15.5 * Ctrl |
| 10395227 | Cog5          | ENSMUST000000 | 5.7389e-005  | 1.51821 | E15.5 * Wnt1 up vs E15.5 * Ctrl |
| 10472097 | Fmn12         | NM_172409     | 5.02631e-007 | 1.51799 | E15.5 * Wnt1 up vs E15.5 * Ctrl |
| 10449041 | Metrn         | NM_133719     | 0.00068534   | 1.51781 | E15.5 * Wnt1 up vs E15.5 * Ctrl |
| 10504008 | Chmp5         | NM_029814     | 1.88634e-006 | 1.51758 | E15.5 * Wnt1 up vs E15.5 * Ctrl |
| 10457357 | Mpp7          | ENSMUST000000 | 0.000433805  | 1.51725 | E15.5 * Wnt1 up vs E15.5 * Ctrl |
| 10345580 | Inpp4a        | NM_030266     | 2.38663e-005 | 1.51644 | E15.5 * Wnt1 up vs E15.5 * Ctrl |
| 10396740 | Gphn          | NM_172952     | 2.94439e-005 | 1.51631 | E15.5 * Wnt1 up vs E15.5 * Ctrl |
| 10584236 | Pate2         | NM_001033421  | 0.000261412  | 1.51572 | E15.5 * Wnt1 up vs E15.5 * Ctrl |
| 10517465 | Kdm1          | NM_133872     | 2.15397e-009 | 1.51558 | E15.5 * Wnt1 up vs E15.5 * Ctrl |
| 10600017 | Hmgb3         | NM_008253     | 1.86151e-009 | 1.51498 | E15.5 * Wnt1 up vs E15.5 * Ctrl |
| 10381260 | Tubg2         | NM_134028     | 1.28716e-005 | 1.51464 | E15.5 * Wnt1 up vs E15.5 * Ctrl |
| 10387194 | Odf4          | NM_145746     | 3.71368e-005 | 1.51444 | E15.5 * Wnt1 up vs E15.5 * Ctrl |
| 10607356 | Gpr173        | NM_027543     | 3.74723e-005 | 1.51441 | E15.5 * Wnt1 up vs E15.5 * Ctrl |
| 10477297 | Kif3b         | NM_008444     | 6.01288e-005 | 1.51383 | E15.5 * Wnt1 up vs E15.5 * Ctrl |
| 10547553 | Mical3        | NM_153396     | 1.65276e-005 | 1.51305 | E15.5 * Wnt1 up vs E15.5 * Ctrl |
| 10431463 | Fam116b       | NM_027081     | 2.26476e-005 | 1.5124  | E15.5 * Wnt1 up vs E15.5 * Ctrl |
| 10346668 | Fam117b       | NM_001037725  | 4.39791e-006 | 1.51233 | E15.5 * Wnt1 up vs E15.5 * Ctrl |
| 10579287 | Tmem59l       | NM_182991     | 0.000209236  | 1.51201 | E15.5 * Wnt1 up vs E15.5 * Ctrl |
| 10463112 | Ccnj          | NM_172839     | 0.00425299   | 1.51193 | E15.5 * Wnt1 up vs E15.5 * Ctrl |
| 10391744 | Gpatch8       | AK135410      | 0.00460062   | 1.5119  | E15.5 * Wnt1 up vs E15.5 * Ctrl |
| 10456248 | Onecut2       | NM_194268     | 0.000117742  | 1.51178 | E15.5 * Wnt1 up vs E15.5 * Ctrl |
| 10493798 | S100a16       | NM_026416     | 0.000719042  | 1.51172 | E15.5 * Wnt1 up vs E15.5 * Ctrl |
| 10599853 | Ldoc1         | NM_001018087  | 0.00108094   | 1.51123 | E15.5 * Wnt1 up vs E15.5 * Ctrl |
| 10425265 | ENSMUSG000000 | ENSMUST000000 | 0.00399497   | 1.51117 | E15.5 * Wnt1 up vs E15.5 * Ctrl |
| 10483353 | Scn7a         | NM_009135     | 0.00143481   | 1.5111  | E15.5 * Wnt1 up vs E15.5 * Ctrl |
| 10518167 | Trappc2       | NM_025432     | 0.004763     | 1.51062 | E15.5 * Wnt1 up vs E15.5 * Ctrl |
| 10456723 | BC031181      | BC016084      | 6.07195e-005 | 1.50975 | E15.5 * Wnt1 up vs E15.5 * Ctrl |
| 10391513 | Dusp3         | NM_028207     | 0.00278861   | 1.50915 | E15.5 * Wnt1 up vs E15.5 * Ctrl |

|          |              |              |              |         |                                 |
|----------|--------------|--------------|--------------|---------|---------------------------------|
| 10354741 | Rftn2        | NM_028713    | 2.7236e-006  | 1.50903 | E15.5 * Wnt1 up vs E15.5 * Ctrl |
| 10411491 | Tnpol        | NM_178716    | 2.40092e-008 | 1.50887 | E15.5 * Wnt1 up vs E15.5 * Ctrl |
| 10560311 |              | ---          | 0.00382354   | 1.50726 | E15.5 * Wnt1 up vs E15.5 * Ctrl |
| 10505630 | Snapc3       | NM_029949    | 1.13304e-006 | 1.50712 | E15.5 * Wnt1 up vs E15.5 * Ctrl |
| 10584883 | Fxyd6        | NM_022004    | 9.78894e-006 | 1.50678 | E15.5 * Wnt1 up vs E15.5 * Ctrl |
| 10482249 | Nr6a1        | NM_010264    | 4.13098e-005 | 1.50668 | E15.5 * Wnt1 up vs E15.5 * Ctrl |
| 10604633 | Cxx1b        | NM_001018063 | 1.66383e-007 | 1.50656 | E15.5 * Wnt1 up vs E15.5 * Ctrl |
| 10551426 | Zfp59        | NM_011762    | 8.86608e-007 | 1.50643 | E15.5 * Wnt1 up vs E15.5 * Ctrl |
| 10499095 | Fam160a1     | NM_172682    | 1.608e-005   | 1.50618 | E15.5 * Wnt1 up vs E15.5 * Ctrl |
| 10545644 | Wbp1         | NM_016757    | 0.00468251   | 1.50591 | E15.5 * Wnt1 up vs E15.5 * Ctrl |
| 10545608 | Sema4f       | NM_011350    | 8.37645e-007 | 1.50553 | E15.5 * Wnt1 up vs E15.5 * Ctrl |
| 10561673 | Spred3       | NM_182927    | 1.20263e-005 | 1.50513 | E15.5 * Wnt1 up vs E15.5 * Ctrl |
| 10575363 | Zfp612       | NM_175480    | 0.000219276  | 1.50481 | E15.5 * Wnt1 up vs E15.5 * Ctrl |
| 10541131 | Dcp1b        | NM_001033379 | 0.000331406  | 1.50476 | E15.5 * Wnt1 up vs E15.5 * Ctrl |
| 10399457 | Akr1b3       | NM_009658    | 1.10944e-005 | 1.50469 | E15.5 * Wnt1 up vs E15.5 * Ctrl |
| 10452257 | Slc25a23     | NM_025877    | 0.000336935  | 1.50441 | E15.5 * Wnt1 up vs E15.5 * Ctrl |
| 10406877 | Serf1        | NM_011353    | 0.000102358  | 1.50419 | E15.5 * Wnt1 up vs E15.5 * Ctrl |
| 10512655 | Rnf38        | NM_001038993 | 7.1787e-008  | 1.50383 | E15.5 * Wnt1 up vs E15.5 * Ctrl |
| 10457359 | Mpp7         | NM_001081287 | 0.000242423  | 1.50377 | E15.5 * Wnt1 up vs E15.5 * Ctrl |
| 10496182 | Cxxc4        | NM_001004367 | 2.19111e-005 | 1.5037  | E15.5 * Wnt1 up vs E15.5 * Ctrl |
| 10479311 | Ss18l1       | NM_178750    | 1.37012e-005 | 1.50278 | E15.5 * Wnt1 up vs E15.5 * Ctrl |
| 10501319 | Celsr2       | NM_017392    | 0.000199072  | 1.50241 | E15.5 * Wnt1 up vs E15.5 * Ctrl |
| 10557628 | Zfp689       | NM_175163    | 2.48655e-005 | 1.50223 | E15.5 * Wnt1 up vs E15.5 * Ctrl |
| 10362394 | Hddc2        | NM_027168    | 0.000510421  | 1.50219 | E15.5 * Wnt1 up vs E15.5 * Ctrl |
| 10538658 | Herc3        | NM_028705    | 1.59211e-006 | 1.50195 | E15.5 * Wnt1 up vs E15.5 * Ctrl |
| 10466976 | Gldc         | NM_138595    | 0.000121185  | 1.50195 | E15.5 * Wnt1 up vs E15.5 * Ctrl |
| 10368092 | Hebp2        | NM_019487    | 0.00012933   | 1.50167 | E15.5 * Wnt1 up vs E15.5 * Ctrl |
| 10497214 | Tpd52        | NM_001025261 | 0.00246188   | 1.50137 | E15.5 * Wnt1 up vs E15.5 * Ctrl |
| 10413243 | Duxbl        | NM_183389    | 0.00046419   | 1.50128 | E15.5 * Wnt1 up vs E15.5 * Ctrl |
| 10526726 | Zkscan1      | NM_133906    | 7.7829e-007  | 1.50088 | E15.5 * Wnt1 up vs E15.5 * Ctrl |
| 10516064 | Mfsd2        | NM_029662    | 0.00176073   | 1.50039 | E15.5 * Wnt1 up vs E15.5 * Ctrl |
| 10428222 | Ncald        | NM_134094    | 1.07402e-005 | 1.5003  | E15.5 * Wnt1 up vs E15.5 * Ctrl |
| 10465619 | Flrt1        | NM_201411    | 0.000812638  | 1.49932 | E15.5 * Wnt1 up vs E15.5 * Ctrl |
| 10356936 | Hisppd1      | NM_173760    | 7.94448e-006 | 1.49928 | E15.5 * Wnt1 up vs E15.5 * Ctrl |
| 10412911 | Fdft1        | BC138301     | 9.56805e-007 | 1.49897 | E15.5 * Wnt1 up vs E15.5 * Ctrl |
| 10426611 | Cacnb3       | NM_007581    | 4.29118e-005 | 1.49841 | E15.5 * Wnt1 up vs E15.5 * Ctrl |
| 10478066 | Snhg11       | NM_175692    | 0.000299333  | 1.49775 | E15.5 * Wnt1 up vs E15.5 * Ctrl |
| 10379321 | Rab11fip4    | NM_175543    | 4.47855e-005 | 1.49764 | E15.5 * Wnt1 up vs E15.5 * Ctrl |
| 10348432 | Agap1        | NM_178119    | 0.000365245  | 1.49761 | E15.5 * Wnt1 up vs E15.5 * Ctrl |
| 10344935 | Kcnb2        | NM_001098528 | 0.00169112   | 1.49747 | E15.5 * Wnt1 up vs E15.5 * Ctrl |
| 10601312 | ENSMUSG00000 | ENSMUST00000 | 0.0044752    | 1.49745 | E15.5 * Wnt1 up vs E15.5 * Ctrl |
| 10395659 | Coch         | NM_007728    | 0.000856352  | 1.49716 | E15.5 * Wnt1 up vs E15.5 * Ctrl |
| 10522335 | Atp10d       | NR_003966    | 1.43644e-005 | 1.49671 | E15.5 * Wnt1 up vs E15.5 * Ctrl |
| 10426180 | Saps2        | NM_026813    | 5.2223e-006  | 1.49649 | E15.5 * Wnt1 up vs E15.5 * Ctrl |
| 10560530 | Bloc1s3      | NM_177692    | 0.00914888   | 1.49631 | E15.5 * Wnt1 up vs E15.5 * Ctrl |
| 10547022 | Timp4        | NM_080639    | 0.000214951  | 1.49608 | E15.5 * Wnt1 up vs E15.5 * Ctrl |
| 10482167 | Zbtb6        | NM_146253    | 0.00413426   | 1.49465 | E15.5 * Wnt1 up vs E15.5 * Ctrl |
| 10452721 | Trmt61b      | AK032413     | 2.14645e-005 | 1.49418 | E15.5 * Wnt1 up vs E15.5 * Ctrl |
| 10363669 | Dnajc12      | NM_013888    | 9.80948e-005 | 1.49396 | E15.5 * Wnt1 up vs E15.5 * Ctrl |
| 10553935 | Tarsl2       | NM_172310    | 0.000128802  | 1.49334 | E15.5 * Wnt1 up vs E15.5 * Ctrl |
| 10530870 | Epha5        | NM_007937    | 0.000264668  | 1.49321 | E15.5 * Wnt1 up vs E15.5 * Ctrl |
| 10495120 | Ovvp1        | NM_007696    | 0.00186633   | 1.49297 | E15.5 * Wnt1 up vs E15.5 * Ctrl |
| 10401343 | Map3k9       | NM_177395    | 1.79092e-005 | 1.49282 | E15.5 * Wnt1 up vs E15.5 * Ctrl |
| 10366825 | Agap2        | NM_001033263 | 9.74213e-005 | 1.49251 | E15.5 * Wnt1 up vs E15.5 * Ctrl |
| 10434436 | Vwa5b2       | NM_001144953 | 0.000340799  | 1.49226 | E15.5 * Wnt1 up vs E15.5 * Ctrl |
| 10398459 | Ppp2r5c      | NM_001135001 | 0.0106362    | 1.49182 | E15.5 * Wnt1 up vs E15.5 * Ctrl |
| 10384566 |              | ---          | 0.0036078    | 1.49129 | E15.5 * Wnt1 up vs E15.5 * Ctrl |
| 10509568 | Camk2n1      | NM_025451    | 1.52761e-005 | 1.49099 | E15.5 * Wnt1 up vs E15.5 * Ctrl |
| 10572733 | BC049349     | BC049349     | 0.00141276   | 1.49031 | E15.5 * Wnt1 up vs E15.5 * Ctrl |
| 10361882 | Nhs1         | NM_173390    | 6.19013e-006 | 1.49013 | E15.5 * Wnt1 up vs E15.5 * Ctrl |
| 10456171 | Spink10      | NM_177829    | 0.00894666   | 1.49005 | E15.5 * Wnt1 up vs E15.5 * Ctrl |
| 10581289 | Atp6v0d1     | NM_013477    | 0.000512674  | 1.48898 | E15.5 * Wnt1 up vs E15.5 * Ctrl |
| 10571371 | Tusc3        | NM_030254    | 1.00507e-007 | 1.48744 | E15.5 * Wnt1 up vs E15.5 * Ctrl |
| 10430280 |              | ---          | 0.000344613  | 1.48717 | E15.5 * Wnt1 up vs E15.5 * Ctrl |
| 10511580 | Ppm2c        | NM_001098230 | 6.59105e-006 | 1.48712 | E15.5 * Wnt1 up vs E15.5 * Ctrl |
| 10390258 | Snx11        | NM_028965    | 0.000130554  | 1.48699 | E15.5 * Wnt1 up vs E15.5 * Ctrl |

|          |               |              |              |         |                                 |
|----------|---------------|--------------|--------------|---------|---------------------------------|
| 10390430 | RP23-157O10.7 | NM_018873    | 3.23506e-007 | 1.4869  | E15.5 * Wnt1 up vs E15.5 * Ctrl |
| 10525210 | AU042671      | ENSMUST00000 | 0.000137339  | 1.48669 | E15.5 * Wnt1 up vs E15.5 * Ctrl |
| 10488862 | Ggt7          | NM_144786    | 1.43225e-006 | 1.48631 | E15.5 * Wnt1 up vs E15.5 * Ctrl |
| 10484488 | P2rx3         | NM_145526    | 6.87645e-005 | 1.48623 | E15.5 * Wnt1 up vs E15.5 * Ctrl |
| 10528238 | Phtf2         | NM_172992    | 6.70781e-005 | 1.48621 | E15.5 * Wnt1 up vs E15.5 * Ctrl |
| 10607225 | Lrch2         | NM_001081173 | 0.000797055  | 1.4862  | E15.5 * Wnt1 up vs E15.5 * Ctrl |
| 10505747 | Rraga         | NM_178376    | 8.98056e-005 | 1.48592 | E15.5 * Wnt1 up vs E15.5 * Ctrl |
| 10433971 | Rimbp3        | NM_001033338 | 0.00056037   | 1.48561 | E15.5 * Wnt1 up vs E15.5 * Ctrl |
| 10358379 | Trove2        | NM_013835    | 0.00013356   | 1.48549 | E15.5 * Wnt1 up vs E15.5 * Ctrl |
| 10535331 | Mmd2          | NM_175217    | 4.51444e-006 | 1.48536 | E15.5 * Wnt1 up vs E15.5 * Ctrl |
| 10380761 | Socs7         | NM_138657    | 2.9418e-005  | 1.48516 | E15.5 * Wnt1 up vs E15.5 * Ctrl |
| 10433735 | Abcc1         | NM_008576    | 6.37197e-005 | 1.48484 | E15.5 * Wnt1 up vs E15.5 * Ctrl |
| 10591853 | Tbx20         | NM_194263    | 0.00144769   | 1.48475 | E15.5 * Wnt1 up vs E15.5 * Ctrl |
| 10491848 | Larp2         | BC100361     | 0.000279071  | 1.48431 | E15.5 * Wnt1 up vs E15.5 * Ctrl |
| 10442968 | Rgs11         | NM_001081069 | 1.78449e-005 | 1.4842  | E15.5 * Wnt1 up vs E15.5 * Ctrl |
| 10486595 | Ttbk2         | NM_001024856 | 5.22906e-006 | 1.48419 | E15.5 * Wnt1 up vs E15.5 * Ctrl |
| 10508986 | Stmn1         | NM_019641    | 4.15085e-011 | 1.48358 | E15.5 * Wnt1 up vs E15.5 * Ctrl |
| 10519117 | Prkcz         | NM_008860    | 1.57576e-005 | 1.48346 | E15.5 * Wnt1 up vs E15.5 * Ctrl |
| 10390175 | Ngfr          | NM_033217    | 8.27452e-005 | 1.4826  | E15.5 * Wnt1 up vs E15.5 * Ctrl |
| 10384555 | Aftph         | NM_181411    | 0.000101236  | 1.4825  | E15.5 * Wnt1 up vs E15.5 * Ctrl |
| 10599612 | Phf6          | NM_027642    | 6.76729e-006 | 1.48241 | E15.5 * Wnt1 up vs E15.5 * Ctrl |
| 10370754 | Dos           | NM_015761    | 4.86711e-006 | 1.48223 | E15.5 * Wnt1 up vs E15.5 * Ctrl |
| 10407955 | Epdr1         | NM_134065    | 0.000346582  | 1.48206 | E15.5 * Wnt1 up vs E15.5 * Ctrl |
| 10436945 | Slc5a3        | NM_017391    | 1.55632e-005 | 1.48195 | E15.5 * Wnt1 up vs E15.5 * Ctrl |
| 10505996 | Fggy          | NM_001113412 | 0.00318212   | 1.48161 | E15.5 * Wnt1 up vs E15.5 * Ctrl |
| 10560408 | Psg17         | NM_007677    | 0.00146689   | 1.48145 | E15.5 * Wnt1 up vs E15.5 * Ctrl |
| 10556553 | Insc          | NM_173767    | 0.000496825  | 1.48096 | E15.5 * Wnt1 up vs E15.5 * Ctrl |
| 10575619 | Terf2ip       | NM_020584    | 4.12417e-005 | 1.48095 | E15.5 * Wnt1 up vs E15.5 * Ctrl |
| 10546775 | Trnt1         | NM_027296    | 3.03986e-005 | 1.48085 | E15.5 * Wnt1 up vs E15.5 * Ctrl |
| 10406434 | Mef2c         | NM_025282    | 2.29169e-006 | 1.48055 | E15.5 * Wnt1 up vs E15.5 * Ctrl |
| 10563390 | Cyth2         | NM_011181    | 0.000965084  | 1.47928 | E15.5 * Wnt1 up vs E15.5 * Ctrl |
| 10574899 | Nuff2         | NM_026532    | 0.00642029   | 1.47921 | E15.5 * Wnt1 up vs E15.5 * Ctrl |
| 10517731 | Igsf21        | NM_198610    | 0.000514908  | 1.47912 | E15.5 * Wnt1 up vs E15.5 * Ctrl |
| 10430113 | D15Wsu169e    | BC060637     | 0.000556483  | 1.47869 | E15.5 * Wnt1 up vs E15.5 * Ctrl |
| 10364712 | Cirbp         | NM_007705    | 0.00256914   | 1.47864 | E15.5 * Wnt1 up vs E15.5 * Ctrl |
| 10486469 | Vps39         | NM_147153    | 2.17534e-005 | 1.47814 | E15.5 * Wnt1 up vs E15.5 * Ctrl |
| 10600886 | Gpr165        | NM_029536    | 0.0036566    | 1.47776 | E15.5 * Wnt1 up vs E15.5 * Ctrl |
| 10553833 | Ndn           | NM_010882    | 1.37551e-005 | 1.4774  | E15.5 * Wnt1 up vs E15.5 * Ctrl |
| 10396831 | Arg2          | NM_009705    | 0.000581246  | 1.47733 | E15.5 * Wnt1 up vs E15.5 * Ctrl |
| 10483299 | Scn1a         | NM_018733    | 2.47352e-007 | 1.47593 | E15.5 * Wnt1 up vs E15.5 * Ctrl |
| 10438103 | Ccdc116       | NM_029779    | 2.36034e-006 | 1.4757  | E15.5 * Wnt1 up vs E15.5 * Ctrl |
| 10368683 | 1700025K23Rik | NM_183254    | 0.00665673   | 1.47568 | E15.5 * Wnt1 up vs E15.5 * Ctrl |
| 10579335 | Pgpep1        | NM_023217    | 1.14122e-005 | 1.47537 | E15.5 * Wnt1 up vs E15.5 * Ctrl |
| 10353272 | Stau2         | NM_025303    | 3.19023e-006 | 1.47535 | E15.5 * Wnt1 up vs E15.5 * Ctrl |
| 10438262 | Slc25a1       | NM_153150    | 0.000358533  | 1.47482 | E15.5 * Wnt1 up vs E15.5 * Ctrl |
| 10431051 | Scube1        | NM_022723    | 0.00021863   | 1.47455 | E15.5 * Wnt1 up vs E15.5 * Ctrl |
| 10599719 | Slc9a6        | NM_172780    | 3.29261e-005 | 1.47429 | E15.5 * Wnt1 up vs E15.5 * Ctrl |
| 10463430 | Sema4g        | NM_011976    | 0.00100609   | 1.47401 | E15.5 * Wnt1 up vs E15.5 * Ctrl |
| 10513818 | Stmn1         | NM_019641    | 1.20902e-010 | 1.47396 | E15.5 * Wnt1 up vs E15.5 * Ctrl |
| 10468217 | Actr1a        | NM_016860    | 0.000236848  | 1.4739  | E15.5 * Wnt1 up vs E15.5 * Ctrl |
| 10434556 | 676915        | XR_034101    | 0.00128597   | 1.4736  | E15.5 * Wnt1 up vs E15.5 * Ctrl |
| 10446334 | Glccl1        | NM_133236    | 0.000323952  | 1.47322 | E15.5 * Wnt1 up vs E15.5 * Ctrl |
| 10526193 | ---           | ---          | 4.76726e-005 | 1.47315 | E15.5 * Wnt1 up vs E15.5 * Ctrl |
| 10430020 | Vps28         | NM_025842    | 0.000416283  | 1.47264 | E15.5 * Wnt1 up vs E15.5 * Ctrl |
| 10378833 | Ssh2          | NM_177710    | 2.36008e-005 | 1.47241 | E15.5 * Wnt1 up vs E15.5 * Ctrl |
| 10354389 | Slc39a10      | NM_172653    | 5.62026e-006 | 1.47196 | E15.5 * Wnt1 up vs E15.5 * Ctrl |
| 10593270 | Ttc12         | NM_172770    | 7.65356e-006 | 1.47194 | E15.5 * Wnt1 up vs E15.5 * Ctrl |
| 10555510 | Pde2a         | NM_001143848 | 8.72473e-006 | 1.47167 | E15.5 * Wnt1 up vs E15.5 * Ctrl |
| 10558948 | Cd151         | NM_009842    | 0.00128113   | 1.47143 | E15.5 * Wnt1 up vs E15.5 * Ctrl |
| 10378649 | Slc43a2       | NM_173388    | 0.000126915  | 1.47132 | E15.5 * Wnt1 up vs E15.5 * Ctrl |
| 10542310 | Cdkn1b        | NM_009875    | 4.25247e-006 | 1.47088 | E15.5 * Wnt1 up vs E15.5 * Ctrl |
| 10383684 | Limk2         | NM_010718    | 4.38803e-007 | 1.47061 | E15.5 * Wnt1 up vs E15.5 * Ctrl |
| 10465844 | Asrgl1        | NM_025610    | 1.49604e-006 | 1.47043 | E15.5 * Wnt1 up vs E15.5 * Ctrl |
| 10403229 | Itgb8         | NM_177290    | 5.41414e-005 | 1.46974 | E15.5 * Wnt1 up vs E15.5 * Ctrl |
| 10521467 | Ccdc96        | NM_025725    | 0.000428042  | 1.46964 | E15.5 * Wnt1 up vs E15.5 * Ctrl |
| 10545658 | Wdr54         | NM_023790    | 1.58088e-007 | 1.46905 | E15.5 * Wnt1 up vs E15.5 * Ctrl |

|                        |               |              |         |                                 |
|------------------------|---------------|--------------|---------|---------------------------------|
| 10391828 C1ql1         | NM_011795     | 0.00214523   | 1.46834 | E15.5 * Wnt1 up vs E15.5 * Ctrl |
| 10447349 Cript         | NM_019936     | 0.000166326  | 1.46714 | E15.5 * Wnt1 up vs E15.5 * Ctrl |
| 10415787 Kcnrg         | NM_206974     | 0.0103993    | 1.46702 | E15.5 * Wnt1 up vs E15.5 * Ctrl |
| 10413771 Capn7         | NM_009796     | 3.06259e-005 | 1.46695 | E15.5 * Wnt1 up vs E15.5 * Ctrl |
| 10388847 Sarm1         | NM_172795     | 1.58595e-005 | 1.46685 | E15.5 * Wnt1 up vs E15.5 * Ctrl |
| 10423355 March11       | NM_177597     | 0.00289159   | 1.4656  | E15.5 * Wnt1 up vs E15.5 * Ctrl |
| 10446001 Fsd1          | NM_183178     | 0.000739405  | 1.465   | E15.5 * Wnt1 up vs E15.5 * Ctrl |
| 10440491 App           | NM_007471     | 0.000126505  | 1.46494 | E15.5 * Wnt1 up vs E15.5 * Ctrl |
| 10594447 Map2k1        | NM_008927     | 2.89484e-005 | 1.46465 | E15.5 * Wnt1 up vs E15.5 * Ctrl |
| 10474141 Slc1a2        | NM_001077514  | 0.000675853  | 1.46464 | E15.5 * Wnt1 up vs E15.5 * Ctrl |
| 10479925 5430407P10Rik | NM_001159657  | 9.49343e-007 | 1.46458 | E15.5 * Wnt1 up vs E15.5 * Ctrl |
| 10390635 1810046J19Rik | NM_025559     | 0.00022133   | 1.46419 | E15.5 * Wnt1 up vs E15.5 * Ctrl |
| 10382341 Sstr2         | NM_009217     | 0.0117872    | 1.4639  | E15.5 * Wnt1 up vs E15.5 * Ctrl |
| 10440206 Arl6          | NM_019665     | 0.0040331    | 1.46366 | E15.5 * Wnt1 up vs E15.5 * Ctrl |
| 10549504 Dennd5b       | NM_177192     | 0.00511055   | 1.4631  | E15.5 * Wnt1 up vs E15.5 * Ctrl |
| 10359255 Fam5b         | NM_207583     | 0.000315548  | 1.46287 | E15.5 * Wnt1 up vs E15.5 * Ctrl |
| 10471080 Usp20         | NM_028846     | 0.0025366    | 1.46275 | E15.5 * Wnt1 up vs E15.5 * Ctrl |
| 10535739 Usp12         | NM_011669     | 0.000195712  | 1.46243 | E15.5 * Wnt1 up vs E15.5 * Ctrl |
| 10587627 Cyb5r4        | NM_024195     | 1.91114e-005 | 1.46232 | E15.5 * Wnt1 up vs E15.5 * Ctrl |
| 10351140 Kifap3        | NM_010629     | 9.01482e-007 | 1.46196 | E15.5 * Wnt1 up vs E15.5 * Ctrl |
| 10481857 Pbx3          | NM_016768     | 5.19453e-006 | 1.46196 | E15.5 * Wnt1 up vs E15.5 * Ctrl |
| 10476207 Atrn          | NM_009730     | 4.06979e-006 | 1.46127 | E15.5 * Wnt1 up vs E15.5 * Ctrl |
| 10553261 Kcnc1         | NM_008421     | 0.000587371  | 1.46117 | E15.5 * Wnt1 up vs E15.5 * Ctrl |
| 10477725 Mmp24         | NM_010808     | 2.06497e-005 | 1.461   | E15.5 * Wnt1 up vs E15.5 * Ctrl |
| 10390860 Krt23         | NM_033373     | 0.00528727   | 1.46099 | E15.5 * Wnt1 up vs E15.5 * Ctrl |
| 10345571 Cnga3         | NM_009918     | 9.29071e-005 | 1.46075 | E15.5 * Wnt1 up vs E15.5 * Ctrl |
| 10431154 Phf21b        | NM_001081166  | 0.000110938  | 1.45943 | E15.5 * Wnt1 up vs E15.5 * Ctrl |
| 10606475 Hdx           | NM_001080549  | 3.17215e-006 | 1.45911 | E15.5 * Wnt1 up vs E15.5 * Ctrl |
| 10404195 D130043K22Rik | NM_001081051  | 1.59592e-006 | 1.45889 | E15.5 * Wnt1 up vs E15.5 * Ctrl |
| 10501121 Fam40a        | NM_153563     | 0.000100734  | 1.45865 | E15.5 * Wnt1 up vs E15.5 * Ctrl |
| 10459827 Rnf165        | ENSMUST000001 | 7.88798e-006 | 1.45855 | E15.5 * Wnt1 up vs E15.5 * Ctrl |
| 10596347 Atp2c1        | NM_175025     | 3.23418e-007 | 1.45842 | E15.5 * Wnt1 up vs E15.5 * Ctrl |
| 10457872 Slc39a6       | NM_139143     | 5.16746e-007 | 1.45842 | E15.5 * Wnt1 up vs E15.5 * Ctrl |
| 10515003 Fam159a       | NM_001099303  | 0.00111102   | 1.45698 | E15.5 * Wnt1 up vs E15.5 * Ctrl |
| 10562408 Chst8         | NM_175140     | 6.16388e-005 | 1.45689 | E15.5 * Wnt1 up vs E15.5 * Ctrl |
| 10604637 Cxx1b         | NM_001018063  | 4.19801e-007 | 1.4565  | E15.5 * Wnt1 up vs E15.5 * Ctrl |
| 10459747 Mapk4         | NM_172632     | 0.00075291   | 1.45649 | E15.5 * Wnt1 up vs E15.5 * Ctrl |
| 10482144 Rc3h2         | NM_001100591  | 4.76461e-006 | 1.45615 | E15.5 * Wnt1 up vs E15.5 * Ctrl |
| 10432492 Faim2         | NM_028224     | 0.000460585  | 1.45586 | E15.5 * Wnt1 up vs E15.5 * Ctrl |
| 10407833 Ggps1         | NM_010282     | 0.000121704  | 1.45584 | E15.5 * Wnt1 up vs E15.5 * Ctrl |
| 10456756 Zbtb7c        | NM_145356     | 5.30237e-005 | 1.45485 | E15.5 * Wnt1 up vs E15.5 * Ctrl |
| 10418901 Gprin2        | ENSMUST000001 | 0.00385475   | 1.4548  | E15.5 * Wnt1 up vs E15.5 * Ctrl |
| 10597883 Ano10         | NM_133979     | 0.00630768   | 1.4547  | E15.5 * Wnt1 up vs E15.5 * Ctrl |
| 10374560 Zrsr1         | NM_011663     | 0.000331706  | 1.45446 | E15.5 * Wnt1 up vs E15.5 * Ctrl |
| 10354768 Akr1b3        | NM_009658     | 7.57641e-007 | 1.45424 | E15.5 * Wnt1 up vs E15.5 * Ctrl |
| 10594679 Tln2          | NM_001081242  | 2.70391e-005 | 1.45418 | E15.5 * Wnt1 up vs E15.5 * Ctrl |
| 10412667 Ptprg         | NM_008981     | 4.65735e-005 | 1.45382 | E15.5 * Wnt1 up vs E15.5 * Ctrl |
| 10499652 4632404H12Rik | ENSMUST000001 | 0.000355033  | 1.45372 | E15.5 * Wnt1 up vs E15.5 * Ctrl |
| 10557285 Lcmt1         | NM_025304     | 0.000306811  | 1.45361 | E15.5 * Wnt1 up vs E15.5 * Ctrl |
| 10439092 1700021K19Rik | BC060601      | 2.11845e-005 | 1.45344 | E15.5 * Wnt1 up vs E15.5 * Ctrl |
| 10494857 Nras          | NM_010937     | 1.92654e-007 | 1.45263 | E15.5 * Wnt1 up vs E15.5 * Ctrl |
| 10468795 Rab11fip2     | NM_001033172  | 0.00212033   | 1.45181 | E15.5 * Wnt1 up vs E15.5 * Ctrl |
| 10357858 Optc          | NM_054076     | 0.00341994   | 1.45145 | E15.5 * Wnt1 up vs E15.5 * Ctrl |
| 10352358 Cnih3         | NM_028408     | 0.00234331   | 1.45139 | E15.5 * Wnt1 up vs E15.5 * Ctrl |
| 10397030 Rgs6          | NM_015812     | 0.000124553  | 1.45124 | E15.5 * Wnt1 up vs E15.5 * Ctrl |
| 10539710 Tia1          | NM_011585     | 2.14888e-006 | 1.4506  | E15.5 * Wnt1 up vs E15.5 * Ctrl |
| 10380672 Skap1         | NM_001033186  | 0.000325893  | 1.45048 | E15.5 * Wnt1 up vs E15.5 * Ctrl |
| 10590860 9030420J04Rik | BC137891      | 0.000391269  | 1.45042 | E15.5 * Wnt1 up vs E15.5 * Ctrl |
| 10505008 Slc44a1       | NM_133891     | 8.88572e-007 | 1.45038 | E15.5 * Wnt1 up vs E15.5 * Ctrl |
| 10537851 Cntnap2       | NM_001004357  | 2.39414e-005 | 1.4503  | E15.5 * Wnt1 up vs E15.5 * Ctrl |
| 10592126 Fam118b       | NM_194257     | 8.90862e-006 | 1.45024 | E15.5 * Wnt1 up vs E15.5 * Ctrl |
| 10583929 B3gat1        | NM_029792     | 7.71457e-005 | 1.45013 | E15.5 * Wnt1 up vs E15.5 * Ctrl |
| 10449034 Fam173a       | BC096050      | 0.00014668   | 1.44963 | E15.5 * Wnt1 up vs E15.5 * Ctrl |
| 10584524 1700001J11Rik | XR_001606     | 0.00647323   | 1.44954 | E15.5 * Wnt1 up vs E15.5 * Ctrl |
| 10567316 Tmc7          | NM_172476     | 0.000263861  | 1.44954 | E15.5 * Wnt1 up vs E15.5 * Ctrl |
| 10569291 Krtap5-2      | NM_027844     | 0.00537363   | 1.44951 | E15.5 * Wnt1 up vs E15.5 * Ctrl |

|          |               |               |              |         |                                 |
|----------|---------------|---------------|--------------|---------|---------------------------------|
| 10574204 | Arl2bp        | NM_024191     | 8.57392e-007 | 1.44927 | E15.5 * Wnt1 up vs E15.5 * Ctrl |
| 10499160 | Cd1d1         | NM_007639     | 0.00811135   | 1.44916 | E15.5 * Wnt1 up vs E15.5 * Ctrl |
| 10544746 | Hoxa1         | NM_010449     | 0.00357354   | 1.449   | E15.5 * Wnt1 up vs E15.5 * Ctrl |
| 10523161 | Mthfd2l       | NM_026788     | 0.0058952    | 1.44851 | E15.5 * Wnt1 up vs E15.5 * Ctrl |
| 10445107 | EG224763      | ENSMUST000001 | 1.1664e-005  | 1.44839 | E15.5 * Wnt1 up vs E15.5 * Ctrl |
| 10421932 | Pcdh9         | NM_001081377  | 0.00559175   | 1.44789 | E15.5 * Wnt1 up vs E15.5 * Ctrl |
| 10413250 | Cphx          | NM_175342     | 0.00076842   | 1.44758 | E15.5 * Wnt1 up vs E15.5 * Ctrl |
| 10598933 | Usp11         | NM_145628     | 5.34122e-005 | 1.44749 | E15.5 * Wnt1 up vs E15.5 * Ctrl |
| 10349184 | Cdh7          | NM_172853     | 2.34318e-006 | 1.44739 | E15.5 * Wnt1 up vs E15.5 * Ctrl |
| 10415842 | ---           | ---           | 0.00460859   | 1.44737 | E15.5 * Wnt1 up vs E15.5 * Ctrl |
| 10404928 | C78339        | NM_001033192  | 1.28671e-006 | 1.44731 | E15.5 * Wnt1 up vs E15.5 * Ctrl |
| 10543859 | Akr1b3        | NM_009658     | 1.2324e-006  | 1.44666 | E15.5 * Wnt1 up vs E15.5 * Ctrl |
| 10479297 | Lsm14b        | NM_177727     | 0.000107717  | 1.44636 | E15.5 * Wnt1 up vs E15.5 * Ctrl |
| 10448235 | A630033E08Rik | NM_001110254  | 0.000357955  | 1.44629 | E15.5 * Wnt1 up vs E15.5 * Ctrl |
| 10513103 | 6430704M03Rik | NM_001142965  | 0.000670931  | 1.44624 | E15.5 * Wnt1 up vs E15.5 * Ctrl |
| 10511014 | ---           | ---           | 0.00129631   | 1.44596 | E15.5 * Wnt1 up vs E15.5 * Ctrl |
| 10390252 | OTTMUSG00000  | ENSMUST00000  | 0.000304187  | 1.44542 | E15.5 * Wnt1 up vs E15.5 * Ctrl |
| 10586505 | Herc1         | BC004027      | 7.57682e-007 | 1.44525 | E15.5 * Wnt1 up vs E15.5 * Ctrl |
| 10458890 | ---           | ---           | 0.00321439   | 1.44518 | E15.5 * Wnt1 up vs E15.5 * Ctrl |
| 10494170 | Lysmd1        | NM_153121     | 8.5133e-005  | 1.4449  | E15.5 * Wnt1 up vs E15.5 * Ctrl |
| 10445235 | ENSMUSG00000  | ENSMUST00000  | 0.00294539   | 1.44436 | E15.5 * Wnt1 up vs E15.5 * Ctrl |
| 10386775 | Prpsap2       | NM_144806     | 0.0027177    | 1.44405 | E15.5 * Wnt1 up vs E15.5 * Ctrl |
| 10445941 | 100043485     | XR_033353     | 0.000108302  | 1.44396 | E15.5 * Wnt1 up vs E15.5 * Ctrl |
| 10450605 | Tubb5         | NM_011655     | 2.57034e-005 | 1.44375 | E15.5 * Wnt1 up vs E15.5 * Ctrl |
| 10565689 | Capn5         | NM_007602     | 0.000196169  | 1.44373 | E15.5 * Wnt1 up vs E15.5 * Ctrl |
| 10393272 | Rnf157        | BC053070      | 0.00032686   | 1.44215 | E15.5 * Wnt1 up vs E15.5 * Ctrl |
| 10547597 | Phc1          | NM_007905     | 1.84103e-005 | 1.44197 | E15.5 * Wnt1 up vs E15.5 * Ctrl |
| 10544062 | D630045J12Rik | ENSMUST00000  | 2.68297e-006 | 1.44195 | E15.5 * Wnt1 up vs E15.5 * Ctrl |
| 10487937 | Prokr2        | NM_144944     | 0.000326313  | 1.4414  | E15.5 * Wnt1 up vs E15.5 * Ctrl |
| 10564157 | ---           | ---           | 0.00689203   | 1.44129 | E15.5 * Wnt1 up vs E15.5 * Ctrl |
| 10549760 | Zfp580        | BC066001      | 0.00815151   | 1.44105 | E15.5 * Wnt1 up vs E15.5 * Ctrl |
| 10530215 | 1110003E01Rik | NM_133697     | 1.34489e-005 | 1.4409  | E15.5 * Wnt1 up vs E15.5 * Ctrl |
| 10441073 | Kcnj6         | NM_010606     | 4.75293e-005 | 1.44073 | E15.5 * Wnt1 up vs E15.5 * Ctrl |
| 10471129 | Freq          | NM_019681     | 0.00316328   | 1.44062 | E15.5 * Wnt1 up vs E15.5 * Ctrl |
| 10392207 | Tex2          | NM_198292     | 0.000714621  | 1.44051 | E15.5 * Wnt1 up vs E15.5 * Ctrl |
| 10344658 | Rb1cc1        | NM_009826     | 0.000117942  | 1.43986 | E15.5 * Wnt1 up vs E15.5 * Ctrl |
| 10403964 | Zfp184        | NM_183014     | 0.0092978    | 1.43971 | E15.5 * Wnt1 up vs E15.5 * Ctrl |
| 10580537 | Aktip         | NM_010241     | 0.000524657  | 1.43958 | E15.5 * Wnt1 up vs E15.5 * Ctrl |
| 10394625 | ---           | ---           | 0.00416543   | 1.43952 | E15.5 * Wnt1 up vs E15.5 * Ctrl |
| 10438791 | Uts2d         | NM_198166     | 0.000740316  | 1.43895 | E15.5 * Wnt1 up vs E15.5 * Ctrl |
| 10456378 | Chmp1b        | NM_024190     | 0.00301378   | 1.4389  | E15.5 * Wnt1 up vs E15.5 * Ctrl |
| 10501183 | 4933431E20Rik | BC060136      | 0.00104815   | 1.43873 | E15.5 * Wnt1 up vs E15.5 * Ctrl |
| 10582551 | Dbndd1        | NM_028146     | 4.71846e-009 | 1.43851 | E15.5 * Wnt1 up vs E15.5 * Ctrl |
| 10421418 | Epb4.9        | NM_013514     | 7.80348e-006 | 1.43845 | E15.5 * Wnt1 up vs E15.5 * Ctrl |
| 10444895 | Flot1         | NM_008027     | 0.000136655  | 1.43829 | E15.5 * Wnt1 up vs E15.5 * Ctrl |
| 10473118 | Ube2e3        | NM_009454     | 7.72631e-007 | 1.43801 | E15.5 * Wnt1 up vs E15.5 * Ctrl |
| 10447594 | Dynlt1        | NM_009342     | 2.96383e-010 | 1.43789 | E15.5 * Wnt1 up vs E15.5 * Ctrl |
| 10413238 | Cphx          | NM_175342     | 0.00105077   | 1.43786 | E15.5 * Wnt1 up vs E15.5 * Ctrl |
| 10413260 | Cphx          | NM_175342     | 0.00105077   | 1.43786 | E15.5 * Wnt1 up vs E15.5 * Ctrl |
| 10510687 | Acot7         | NM_133348     | 0.000172656  | 1.43777 | E15.5 * Wnt1 up vs E15.5 * Ctrl |
| 10530783 | A730089K16Rik | ENSMUST00000  | 0.000426092  | 1.43693 | E15.5 * Wnt1 up vs E15.5 * Ctrl |
| 10546736 | Cntn3         | NM_008779     | 0.00353103   | 1.43679 | E15.5 * Wnt1 up vs E15.5 * Ctrl |
| 10545940 | Gmcl1         | NM_011818     | 5.54695e-009 | 1.43658 | E15.5 * Wnt1 up vs E15.5 * Ctrl |
| 10504402 | 4930500O05Rik | NM_001085508  | 6.89856e-005 | 1.43644 | E15.5 * Wnt1 up vs E15.5 * Ctrl |
| 10593713 | Cib2          | NM_019686     | 9.11858e-005 | 1.4364  | E15.5 * Wnt1 up vs E15.5 * Ctrl |
| 10468517 | Mxi1          | NM_010847     | 0.000757787  | 1.43624 | E15.5 * Wnt1 up vs E15.5 * Ctrl |
| 10607113 | Rgs3          | NM_134257     | 0.000792896  | 1.43578 | E15.5 * Wnt1 up vs E15.5 * Ctrl |
| 10597918 | ---           | ---           | 0.000363801  | 1.43569 | E15.5 * Wnt1 up vs E15.5 * Ctrl |
| 10585494 | Ube2q2        | NM_180600     | 4.09815e-005 | 1.43532 | E15.5 * Wnt1 up vs E15.5 * Ctrl |
| 10350473 | B3galt2       | NM_020025     | 0.00119564   | 1.4349  | E15.5 * Wnt1 up vs E15.5 * Ctrl |
| 10441511 | ---           | ---           | 2.97785e-005 | 1.43482 | E15.5 * Wnt1 up vs E15.5 * Ctrl |
| 10594001 | Arid3b        | NM_019689     | 2.5679e-005  | 1.43359 | E15.5 * Wnt1 up vs E15.5 * Ctrl |
| 10431170 | 5031439G07Rik | NM_001033273  | 0.000309856  | 1.43353 | E15.5 * Wnt1 up vs E15.5 * Ctrl |
| 10400538 | Trappc6b      | NM_030057     | 2.24272e-005 | 1.43277 | E15.5 * Wnt1 up vs E15.5 * Ctrl |
| 10482846 | Ccdc148       | BC062650      | 0.00286926   | 1.43211 | E15.5 * Wnt1 up vs E15.5 * Ctrl |
| 10541098 | Zfp239        | NM_001001792  | 7.08064e-007 | 1.43172 | E15.5 * Wnt1 up vs E15.5 * Ctrl |

|                        |               |              |         |                                 |
|------------------------|---------------|--------------|---------|---------------------------------|
| 10501358 Sars          | NM_011319     | 4.99159e-006 | 1.43145 | E15.5 * Wnt1 up vs E15.5 * Ctrl |
| 10352503 Bpnt1         | NM_011794     | 0.00121952   | 1.43123 | E15.5 * Wnt1 up vs E15.5 * Ctrl |
| 10377018 Myh3          | NM_001099635  | 7.32414e-006 | 1.4312  | E15.5 * Wnt1 up vs E15.5 * Ctrl |
| 10492231 Med12l        | ENSMUST000000 | 0.000330983  | 1.43119 | E15.5 * Wnt1 up vs E15.5 * Ctrl |
| 10573566 Dhps          | NM_001039514  | 5.95324e-006 | 1.4298  | E15.5 * Wnt1 up vs E15.5 * Ctrl |
| 10524955 Tesc          | NM_021344     | 0.000930456  | 1.42979 | E15.5 * Wnt1 up vs E15.5 * Ctrl |
| 10416505 Kctd4         | NM_026214     | 0.00316526   | 1.42966 | E15.5 * Wnt1 up vs E15.5 * Ctrl |
| 10549849 Zfp78         | NM_001025163  | 0.000139953  | 1.42895 | E15.5 * Wnt1 up vs E15.5 * Ctrl |
| 10373728 Patz1         | NM_019574     | 0.00233941   | 1.42894 | E15.5 * Wnt1 up vs E15.5 * Ctrl |
| 10483163 Grb14         | NM_016719     | 0.0111135    | 1.42885 | E15.5 * Wnt1 up vs E15.5 * Ctrl |
| 10527306 Lmtk2         | NM_001081109  | 2.44918e-005 | 1.42855 | E15.5 * Wnt1 up vs E15.5 * Ctrl |
| 10574404 Setd6         | NM_001035123  | 0.000506731  | 1.4284  | E15.5 * Wnt1 up vs E15.5 * Ctrl |
| 10475567 Slc24a5       | NM_175034     | 9.87144e-005 | 1.42837 | E15.5 * Wnt1 up vs E15.5 * Ctrl |
| 10485048 D2Erd391e     | BC023673      | 0.000171459  | 1.42819 | E15.5 * Wnt1 up vs E15.5 * Ctrl |
| 10605247 Mecp2         | NM_010788     | 6.46133e-005 | 1.42793 | E15.5 * Wnt1 up vs E15.5 * Ctrl |
| 10358057 Shisa4        | NM_175259     | 5.68897e-007 | 1.42771 | E15.5 * Wnt1 up vs E15.5 * Ctrl |
| 10527886 Pex1          | NM_027777     | 0.0122199    | 1.42744 | E15.5 * Wnt1 up vs E15.5 * Ctrl |
| 10476596 MacroD2       | NM_001013802  | 0.00110436   | 1.42689 | E15.5 * Wnt1 up vs E15.5 * Ctrl |
| 10398483 Dync1h1       | NM_030238     | 9.90009e-006 | 1.42654 | E15.5 * Wnt1 up vs E15.5 * Ctrl |
| 10412773 Slc4a7        | NM_001033270  | 0.000220286  | 1.42605 | E15.5 * Wnt1 up vs E15.5 * Ctrl |
| 10373407 Mbc2          | NM_011843     | 0.00315848   | 1.42597 | E15.5 * Wnt1 up vs E15.5 * Ctrl |
| 10538755 Smarcd1       | NM_007958     | 4.24033e-007 | 1.42594 | E15.5 * Wnt1 up vs E15.5 * Ctrl |
| 10523595 Ptpn13        | NM_011204     | 8.50119e-007 | 1.42582 | E15.5 * Wnt1 up vs E15.5 * Ctrl |
| 10388154 Med31         | NM_026068     | 0.00508791   | 1.42565 | E15.5 * Wnt1 up vs E15.5 * Ctrl |
| 10532586 Myo18b        | BC145218      | 0.00490015   | 1.42562 | E15.5 * Wnt1 up vs E15.5 * Ctrl |
| 10462035 Ldhd          | NM_008492     | 8.73027e-006 | 1.42555 | E15.5 * Wnt1 up vs E15.5 * Ctrl |
| 10574259 Gpr56         | NM_018882     | 4.42851e-005 | 1.42532 | E15.5 * Wnt1 up vs E15.5 * Ctrl |
| 10519482 EG667705      | ENSMUST000000 | 0.000425292  | 1.42498 | E15.5 * Wnt1 up vs E15.5 * Ctrl |
| 10501909 Mettl14       | NM_201638     | 6.73489e-007 | 1.42483 | E15.5 * Wnt1 up vs E15.5 * Ctrl |
| 10597377 Fbxl2         | NM_178624     | 1.40812e-006 | 1.4248  | E15.5 * Wnt1 up vs E15.5 * Ctrl |
| 10400004               | ---           | 0.0124836    | 1.42435 | E15.5 * Wnt1 up vs E15.5 * Ctrl |
| 10541877 Vamp1         | NM_001080557  | 0.000494605  | 1.42384 | E15.5 * Wnt1 up vs E15.5 * Ctrl |
| 10441864 Mllt4         | NM_010806     | 2.17197e-006 | 1.42382 | E15.5 * Wnt1 up vs E15.5 * Ctrl |
| 10577858 Bag4          | NM_026121     | 1.0795e-005  | 1.42368 | E15.5 * Wnt1 up vs E15.5 * Ctrl |
| 10442616 Hagh          | NM_024284     | 0.000192387  | 1.42337 | E15.5 * Wnt1 up vs E15.5 * Ctrl |
| 10377725 Dlg4          | NM_007864     | 0.00035577   | 1.42319 | E15.5 * Wnt1 up vs E15.5 * Ctrl |
| 10563852 Nipa1         | NM_153578     | 0.00341808   | 1.42294 | E15.5 * Wnt1 up vs E15.5 * Ctrl |
| 10593628 Rab39         | NM_175562     | 0.000327958  | 1.42289 | E15.5 * Wnt1 up vs E15.5 * Ctrl |
| 10501629 Cdc14a        | NM_001080818  | 5.01972e-006 | 1.42272 | E15.5 * Wnt1 up vs E15.5 * Ctrl |
| 10362630               | ---           | 0.00215991   | 1.42224 | E15.5 * Wnt1 up vs E15.5 * Ctrl |
| 10516427 Ncdn          | NM_011986     | 0.000956721  | 1.42206 | E15.5 * Wnt1 up vs E15.5 * Ctrl |
| 10439138 Kalrn         | BC157950      | 0.00084021   | 1.42202 | E15.5 * Wnt1 up vs E15.5 * Ctrl |
| 10383681 Patz1         | NM_019574     | 1.24046e-007 | 1.42194 | E15.5 * Wnt1 up vs E15.5 * Ctrl |
| 10387483 Efnb3         | NM_007911     | 0.0012536    | 1.42191 | E15.5 * Wnt1 up vs E15.5 * Ctrl |
| 10391732 Gpatch8       | NM_001159492  | 4.6306e-005  | 1.42158 | E15.5 * Wnt1 up vs E15.5 * Ctrl |
| 10591241 Zfp426        | NM_146221     | 0.000500397  | 1.42112 | E15.5 * Wnt1 up vs E15.5 * Ctrl |
| 10550514 Nova2         | NM_001029877  | 7.82483e-005 | 1.42106 | E15.5 * Wnt1 up vs E15.5 * Ctrl |
| 10604799 Atp11c        | NM_001037863  | 0.000738806  | 1.42029 | E15.5 * Wnt1 up vs E15.5 * Ctrl |
| 10529708 Zfp518b       | NM_001081144  | 0.000210372  | 1.42011 | E15.5 * Wnt1 up vs E15.5 * Ctrl |
| 10561854 Tbc1b         | NM_025548     | 7.68467e-005 | 1.42006 | E15.5 * Wnt1 up vs E15.5 * Ctrl |
| 10407907 Rala          | NM_019491     | 0.00137933   | 1.41972 | E15.5 * Wnt1 up vs E15.5 * Ctrl |
| 10494208 Fam63a        | NM_133858     | 2.10357e-005 | 1.4191  | E15.5 * Wnt1 up vs E15.5 * Ctrl |
| 10394794 EG245297      | BC030401      | 0.00720208   | 1.41904 | E15.5 * Wnt1 up vs E15.5 * Ctrl |
| 10485546 D430041D05Rik | NM_001033347  | 0.000598949  | 1.41888 | E15.5 * Wnt1 up vs E15.5 * Ctrl |
| 10590433 1700048O20Rik | BC048726      | 0.000343798  | 1.4188  | E15.5 * Wnt1 up vs E15.5 * Ctrl |
| 10511725 Cyb5r4        | NM_024195     | 6.90477e-005 | 1.41807 | E15.5 * Wnt1 up vs E15.5 * Ctrl |
| 10461459 Syt7          | NM_173068     | 1.25253e-005 | 1.41797 | E15.5 * Wnt1 up vs E15.5 * Ctrl |
| 10571045 Bag4          | NM_026121     | 3.52705e-005 | 1.41789 | E15.5 * Wnt1 up vs E15.5 * Ctrl |
| 10434418 Vwa5b2        | NM_182636     | 8.11397e-006 | 1.41721 | E15.5 * Wnt1 up vs E15.5 * Ctrl |
| 10521995 3110047P20Rik | NM_177006     | 0.00591928   | 1.41711 | E15.5 * Wnt1 up vs E15.5 * Ctrl |
| 10475990 Slc20a1       | NM_015747     | 3.27685e-005 | 1.41649 | E15.5 * Wnt1 up vs E15.5 * Ctrl |
| 10604687 Mmgt1         | NM_146234     | 6.96842e-005 | 1.41631 | E15.5 * Wnt1 up vs E15.5 * Ctrl |
| 10380219 Vezf1         | NM_016686     | 2.90974e-007 | 1.41604 | E15.5 * Wnt1 up vs E15.5 * Ctrl |
| 10446785 Spast         | NM_016962     | 1.37412e-009 | 1.41578 | E15.5 * Wnt1 up vs E15.5 * Ctrl |
| 10411171 Pde8b         | NM_172263     | 2.17514e-005 | 1.41552 | E15.5 * Wnt1 up vs E15.5 * Ctrl |
| 10457844 Zfp191        | NM_021559     | 6.72941e-007 | 1.41521 | E15.5 * Wnt1 up vs E15.5 * Ctrl |

|          |               |               |              |         |                                 |
|----------|---------------|---------------|--------------|---------|---------------------------------|
| 10369479 | Lrrc20        | ENSMUST000001 | 0.000126134  | 1.4149  | E15.5 * Wnt1 up vs E15.5 * Ctrl |
| 10357339 | Lypd1         | NM_145100     | 0.000582325  | 1.41462 | E15.5 * Wnt1 up vs E15.5 * Ctrl |
| 10429218 | Fam135b       | NM_177819     | 6.99454e-005 | 1.41437 | E15.5 * Wnt1 up vs E15.5 * Ctrl |
| 10549854 | Zfp28         | NM_175247     | 0.000154831  | 1.4143  | E15.5 * Wnt1 up vs E15.5 * Ctrl |
| 10601915 | BC031748      | BC031748      | 2.20316e-005 | 1.41426 | E15.5 * Wnt1 up vs E15.5 * Ctrl |
| 10560945 | Grik5         | NM_008168     | 0.00155057   | 1.41424 | E15.5 * Wnt1 up vs E15.5 * Ctrl |
| 10454851 | Cxxc5         | NM_133687     | 0.00023225   | 1.41388 | E15.5 * Wnt1 up vs E15.5 * Ctrl |
| 10473045 | Rbm45         | NM_153405     | 1.55528e-005 | 1.41386 | E15.5 * Wnt1 up vs E15.5 * Ctrl |
| 10377984 | Zfp3          | NM_177565     | 0.000109039  | 1.41369 | E15.5 * Wnt1 up vs E15.5 * Ctrl |
| 10514658 | Itgb3bp       | ENSMUST000001 | 1.06319e-005 | 1.41354 | E15.5 * Wnt1 up vs E15.5 * Ctrl |
| 10396278 | Daam1         | NM_026102     | 2.229e-005   | 1.41341 | E15.5 * Wnt1 up vs E15.5 * Ctrl |
| 10412844 | Top2b         | NM_009409     | 7.3299e-007  | 1.41312 | E15.5 * Wnt1 up vs E15.5 * Ctrl |
| 10476301 | Smox          | NM_145533     | 0.00349107   | 1.41306 | E15.5 * Wnt1 up vs E15.5 * Ctrl |
| 10454632 | Camk4         | NM_009793     | 0.00337415   | 1.41293 | E15.5 * Wnt1 up vs E15.5 * Ctrl |
| 10503534 | Ccnc          | NM_016746     | 0.00559951   | 1.4127  | E15.5 * Wnt1 up vs E15.5 * Ctrl |
| 10578574 | Stox2         | NM_175162     | 0.00459901   | 1.41261 | E15.5 * Wnt1 up vs E15.5 * Ctrl |
| 10559766 | Zfp583        | NM_001033249  | 0.00353408   | 1.41259 | E15.5 * Wnt1 up vs E15.5 * Ctrl |
| 10508651 | Sdc3          | NM_011520     | 0.00196865   | 1.41219 | E15.5 * Wnt1 up vs E15.5 * Ctrl |
| 10558742 | Nlrp6         | NM_001081389  | 3.03333e-005 | 1.41199 | E15.5 * Wnt1 up vs E15.5 * Ctrl |
| 10532588 | Myo18b        | BC145218      | 0.000865566  | 1.41192 | E15.5 * Wnt1 up vs E15.5 * Ctrl |
| 10471953 | Acvr2a        | NM_007396     | 4.924e-007   | 1.4119  | E15.5 * Wnt1 up vs E15.5 * Ctrl |
| 10427253 | Map3k12       | NM_009582     | 0.00112421   | 1.41183 | E15.5 * Wnt1 up vs E15.5 * Ctrl |
| 10447100 | Morn2         | NM_194269     | 0.000457489  | 1.41127 | E15.5 * Wnt1 up vs E15.5 * Ctrl |
| 10375175 | Slit3         | NM_011412     | 9.10064e-005 | 1.41124 | E15.5 * Wnt1 up vs E15.5 * Ctrl |
| 10456405 | Slmo1         | NM_144867     | 0.000493863  | 1.41118 | E15.5 * Wnt1 up vs E15.5 * Ctrl |
| 10532578 | Myo18b        | BC145218      | 0.000126109  | 1.41083 | E15.5 * Wnt1 up vs E15.5 * Ctrl |
| 10519270 | Agrn          | NM_021604     | 0.00923214   | 1.41075 | E15.5 * Wnt1 up vs E15.5 * Ctrl |
| 10445071 | Zfp57         | NM_001013745  | 1.34908e-005 | 1.41067 | E15.5 * Wnt1 up vs E15.5 * Ctrl |
| 10548785 | Dynl1         | NM_009342     | 8.52211e-010 | 1.41046 | E15.5 * Wnt1 up vs E15.5 * Ctrl |
| 10420787 | Mttr9         | NM_177594     | 0.00021293   | 1.41041 | E15.5 * Wnt1 up vs E15.5 * Ctrl |
| 10384797 | Ccdc85a       | NM_181577     | 0.000127757  | 1.41038 | E15.5 * Wnt1 up vs E15.5 * Ctrl |
| 10578763 | Sap30         | NM_021788     | 6.49835e-007 | 1.41024 | E15.5 * Wnt1 up vs E15.5 * Ctrl |
| 10368197 | ENSMUSG000001 | ENSMUST000001 | 0.00553984   | 1.40949 | E15.5 * Wnt1 up vs E15.5 * Ctrl |
| 10568252 | Zfp689        | NM_175163     | 0.000783612  | 1.40927 | E15.5 * Wnt1 up vs E15.5 * Ctrl |
| 10572613 | Mrpl34        | NM_053162     | 0.00678401   | 1.40903 | E15.5 * Wnt1 up vs E15.5 * Ctrl |
| 10601492 | Zfp711        | NM_177747     | 0.00262487   | 1.40899 | E15.5 * Wnt1 up vs E15.5 * Ctrl |
| 10483025 | Rbms1         | NM_001141932  | 5.96311e-007 | 1.40888 | E15.5 * Wnt1 up vs E15.5 * Ctrl |
| 10389674 | Dynl2         | NM_026556     | 2.69452e-007 | 1.40885 | E15.5 * Wnt1 up vs E15.5 * Ctrl |
| 10358658 | Hmcn1         | NM_001024720  | 0.000418032  | 1.40873 | E15.5 * Wnt1 up vs E15.5 * Ctrl |
| 10570236 | Mcf2l         | NM_178076     | 2.55799e-005 | 1.40859 | E15.5 * Wnt1 up vs E15.5 * Ctrl |
| 10395538 | Pnpla8        | NM_026164     | 1.33677e-005 | 1.40823 | E15.5 * Wnt1 up vs E15.5 * Ctrl |
| 10579996 | Gpsn2         | NM_134118     | 0.000101781  | 1.40806 | E15.5 * Wnt1 up vs E15.5 * Ctrl |
| 10367697 | Ppp1r14c      | NM_133485     | 2.55515e-005 | 1.40798 | E15.5 * Wnt1 up vs E15.5 * Ctrl |
| 10391146 | Acly          | NM_134037     | 0.00144237   | 1.40796 | E15.5 * Wnt1 up vs E15.5 * Ctrl |
| 10471247 | Aif1l         | NM_145144     | 0.00211504   | 1.40789 | E15.5 * Wnt1 up vs E15.5 * Ctrl |
| 10544941 | Pde1c         | NM_011054     | 0.000259757  | 1.40775 | E15.5 * Wnt1 up vs E15.5 * Ctrl |
| 10384672 | Ahsa2         | NM_172391     | 3.20074e-006 | 1.40768 | E15.5 * Wnt1 up vs E15.5 * Ctrl |
| 10426284 | Acr           | NM_013455     | 7.7755e-005  | 1.40759 | E15.5 * Wnt1 up vs E15.5 * Ctrl |
| 10428020 | March6        | NM_172606     | 1.59756e-005 | 1.40751 | E15.5 * Wnt1 up vs E15.5 * Ctrl |
| 10428232 | Rrm2b         | NM_199476     | 5.51293e-005 | 1.40698 | E15.5 * Wnt1 up vs E15.5 * Ctrl |
| 10476355 | Chgb          | NM_007694     | 0.00988184   | 1.40678 | E15.5 * Wnt1 up vs E15.5 * Ctrl |
| 10467091 | Atad1         | NM_026487     | 8.46755e-005 | 1.40653 | E15.5 * Wnt1 up vs E15.5 * Ctrl |
| 10545014 | AW146242      | BC024822      | 0.00058588   | 1.40648 | E15.5 * Wnt1 up vs E15.5 * Ctrl |
| 10455826 | Megf10        | NM_001001979  | 0.00451793   | 1.40584 | E15.5 * Wnt1 up vs E15.5 * Ctrl |
| 10601846 | 2900062L11Rik | NR_003642     | 0.00262764   | 1.40562 | E15.5 * Wnt1 up vs E15.5 * Ctrl |
| 10439063 | Fbxo45        | NM_173439     | 3.01831e-005 | 1.40534 | E15.5 * Wnt1 up vs E15.5 * Ctrl |
| 10415074 | Rem2          | NM_080726     | 0.00114017   | 1.40525 | E15.5 * Wnt1 up vs E15.5 * Ctrl |
| 10372831 | Tbc1d30       | BC138285      | 0.00113346   | 1.40446 | E15.5 * Wnt1 up vs E15.5 * Ctrl |
| 10384715 | LOC100134990  | NR_004857     | 0.00310695   | 1.40437 | E15.5 * Wnt1 up vs E15.5 * Ctrl |
| 10362147 | Taar1         | NM_053205     | 0.00075588   | 1.40436 | E15.5 * Wnt1 up vs E15.5 * Ctrl |
| 10506883 | Rab3b         | NM_023537     | 0.000615082  | 1.40413 | E15.5 * Wnt1 up vs E15.5 * Ctrl |
| 10395463 | Ifrd1         | NM_013562     | 0.000960474  | 1.40398 | E15.5 * Wnt1 up vs E15.5 * Ctrl |
| 10368227 | Ube2q2        | NM_180600     | 0.000184572  | 1.40373 | E15.5 * Wnt1 up vs E15.5 * Ctrl |
| 10399224 | Kif3c         | NM_008445     | 0.00527522   | 1.40371 | E15.5 * Wnt1 up vs E15.5 * Ctrl |
| 10353871 | Lman2l        | NM_001013374  | 0.00454115   | 1.40364 | E15.5 * Wnt1 up vs E15.5 * Ctrl |
| 10401422 | Pnma1         | NM_027438     | 0.000199022  | 1.40326 | E15.5 * Wnt1 up vs E15.5 * Ctrl |

|          |               |              |              |         |                                 |
|----------|---------------|--------------|--------------|---------|---------------------------------|
| 10521163 | Gm1673        | BC147444     | 0.000192675  | 1.40298 | E15.5 * Wnt1 up vs E15.5 * Ctrl |
| 10577240 | Csmd1         | NM_053171    | 2.3805e-005  | 1.40283 | E15.5 * Wnt1 up vs E15.5 * Ctrl |
| 10372177 | Tmtc2         | NM_177368    | 6.51451e-005 | 1.40277 | E15.5 * Wnt1 up vs E15.5 * Ctrl |
| 10404376 | Agtr1a        | NM_177322    | 4.08268e-005 | 1.40269 | E15.5 * Wnt1 up vs E15.5 * Ctrl |
| 10456587 | Mro           | NM_027741    | 0.000470057  | 1.40253 | E15.5 * Wnt1 up vs E15.5 * Ctrl |
| 10555946 | Smpd1         | NM_011421    | 0.00386131   | 1.40249 | E15.5 * Wnt1 up vs E15.5 * Ctrl |
| 10529797 | ---           | ---          | 0.0003874    | 1.40248 | E15.5 * Wnt1 up vs E15.5 * Ctrl |
| 10437080 | Ttc3          | NM_009441    | 2.07521e-008 | 1.40187 | E15.5 * Wnt1 up vs E15.5 * Ctrl |
| 10525877 | Zfp664        | NM_001081750 | 2.51787e-005 | 1.40186 | E15.5 * Wnt1 up vs E15.5 * Ctrl |
| 10556640 | 6330503K22Rik | NM_182995    | 8.6206e-005  | 1.40171 | E15.5 * Wnt1 up vs E15.5 * Ctrl |
| 10576692 | Insr          | NM_010568    | 4.22642e-005 | 1.40164 | E15.5 * Wnt1 up vs E15.5 * Ctrl |
| 10399841 | Cbl1          | NM_134048    | 9.93304e-006 | 1.40133 | E15.5 * Wnt1 up vs E15.5 * Ctrl |
| 10374908 | Rtn4          | NM_194054    | 3.6661e-007  | 1.40127 | E15.5 * Wnt1 up vs E15.5 * Ctrl |
| 10392374 | Cacng5        | NM_080644    | 0.00374137   | 1.40062 | E15.5 * Wnt1 up vs E15.5 * Ctrl |
| 10412913 | EG667344      | XR_031629    | 0.000574331  | 1.40051 | E15.5 * Wnt1 up vs E15.5 * Ctrl |
| 10505213 | E130308A19Rik | NM_001015681 | 1.17788e-005 | 1.4004  | E15.5 * Wnt1 up vs E15.5 * Ctrl |
| 10418895 | Zfp488        | NM_001013777 | 0.000319696  | 1.4003  | E15.5 * Wnt1 up vs E15.5 * Ctrl |
| 10423505 | Cmb1          | NM_181588    | 0.00469599   | 1.39985 | E15.5 * Wnt1 up vs E15.5 * Ctrl |
| 10389047 | Accn1         | NM_001034013 | 0.00783042   | 1.39938 | E15.5 * Wnt1 up vs E15.5 * Ctrl |
| 10552672 | Aspdh         | NM_026690    | 0.0012033    | 1.39926 | E15.5 * Wnt1 up vs E15.5 * Ctrl |
| 10445237 | LOC627626     | BC151166     | 0.00269432   | 1.39916 | E15.5 * Wnt1 up vs E15.5 * Ctrl |
| 10475264 | Ccndbp1       | NM_010761    | 0.000682167  | 1.39899 | E15.5 * Wnt1 up vs E15.5 * Ctrl |
| 10517328 | Tmem50a       | NM_027935    | 6.83816e-007 | 1.39897 | E15.5 * Wnt1 up vs E15.5 * Ctrl |
| 10593499 | Al593442      | NM_178906    | 0.000487086  | 1.39897 | E15.5 * Wnt1 up vs E15.5 * Ctrl |
| 10462957 | Tbc1d12       | NM_145952    | 0.0051667    | 1.39857 | E15.5 * Wnt1 up vs E15.5 * Ctrl |
| 10515924 | Rimk1a        | NM_177572    | 0.000357243  | 1.3983  | E15.5 * Wnt1 up vs E15.5 * Ctrl |
| 10494536 | Pdzk1         | NM_021517    | 2.08724e-006 | 1.39807 | E15.5 * Wnt1 up vs E15.5 * Ctrl |
| 10392601 | Abca6         | NM_147218    | 0.00313099   | 1.39805 | E15.5 * Wnt1 up vs E15.5 * Ctrl |
| 10482139 | Pdcl          | NM_026176    | 0.00618272   | 1.39779 | E15.5 * Wnt1 up vs E15.5 * Ctrl |
| 10594988 | Mapk6         | NM_015806    | 1.96993e-007 | 1.39769 | E15.5 * Wnt1 up vs E15.5 * Ctrl |
| 10583163 | Trpc6         | NM_013838    | 0.000244996  | 1.39755 | E15.5 * Wnt1 up vs E15.5 * Ctrl |
| 10377534 | A030009H04Rik | AB041807     | 7.49438e-005 | 1.39749 | E15.5 * Wnt1 up vs E15.5 * Ctrl |
| 10381960 | ENSMUSG00000  | ENSMUST00000 | 0.000344335  | 1.39725 | E15.5 * Wnt1 up vs E15.5 * Ctrl |
| 10371811 | Scyl2         | NM_198021    | 8.2083e-006  | 1.39717 | E15.5 * Wnt1 up vs E15.5 * Ctrl |
| 10514590 | Dock7         | NM_026082    | 5.86928e-008 | 1.3965  | E15.5 * Wnt1 up vs E15.5 * Ctrl |
| 10382866 | Mgat5b        | NM_172948    | 0.00092528   | 1.39642 | E15.5 * Wnt1 up vs E15.5 * Ctrl |
| 10503019 | 4930566N20Rik | ENSMUST00000 | 9.03612e-006 | 1.39613 | E15.5 * Wnt1 up vs E15.5 * Ctrl |
| 10433672 | Rrn3          | NM_001039521 | 1.28984e-005 | 1.39601 | E15.5 * Wnt1 up vs E15.5 * Ctrl |
| 10561376 | DI3           | NM_007866    | 0.000480572  | 1.39589 | E15.5 * Wnt1 up vs E15.5 * Ctrl |
| 10531437 | Scarb2        | NM_007644    | 0.000775489  | 1.39579 | E15.5 * Wnt1 up vs E15.5 * Ctrl |
| 10453887 | Cables1       | NM_001146287 | 7.4007e-005  | 1.39493 | E15.5 * Wnt1 up vs E15.5 * Ctrl |
| 10587194 | Gnb5          | NM_138719    | 0.00208066   | 1.39491 | E15.5 * Wnt1 up vs E15.5 * Ctrl |
| 10356628 | Hdac4         | NM_207225    | 0.000257711  | 1.39481 | E15.5 * Wnt1 up vs E15.5 * Ctrl |
| 10425335 | Syng1         | NM_207708    | 6.88384e-005 | 1.39431 | E15.5 * Wnt1 up vs E15.5 * Ctrl |
| 10503995 | Dnaja1        | NM_008298    | 4.62117e-006 | 1.39409 | E15.5 * Wnt1 up vs E15.5 * Ctrl |
| 10512030 | 3110043O21Rik | BC076612     | 0.00215863   | 1.39387 | E15.5 * Wnt1 up vs E15.5 * Ctrl |
| 10578287 | Cnot7         | NM_011135    | 1.16848e-006 | 1.39377 | E15.5 * Wnt1 up vs E15.5 * Ctrl |
| 10439701 | Abhd10        | NM_172511    | 0.000171965  | 1.39353 | E15.5 * Wnt1 up vs E15.5 * Ctrl |
| 10542006 | D6Wsu163e     | NM_138594    | 1.18207e-005 | 1.39324 | E15.5 * Wnt1 up vs E15.5 * Ctrl |
| 10345879 | Pou3f3        | NM_008900    | 0.0037197    | 1.39289 | E15.5 * Wnt1 up vs E15.5 * Ctrl |
| 10578922 | Klhl2         | NM_178633    | 0.000580615  | 1.39276 | E15.5 * Wnt1 up vs E15.5 * Ctrl |
| 10544542 | Zfp786        | NM_177882    | 0.00132931   | 1.39266 | E15.5 * Wnt1 up vs E15.5 * Ctrl |
| 10449971 | Zfp763        | NM_028543    | 0.0119455    | 1.3924  | E15.5 * Wnt1 up vs E15.5 * Ctrl |
| 10512044 | Lingo2        | NM_175516    | 0.000424842  | 1.39237 | E15.5 * Wnt1 up vs E15.5 * Ctrl |
| 10410654 | ---           | ---          | 0.002161     | 1.39232 | E15.5 * Wnt1 up vs E15.5 * Ctrl |
| 10395672 | Ap4s1         | NM_021710    | 1.35384e-005 | 1.39169 | E15.5 * Wnt1 up vs E15.5 * Ctrl |
| 10533659 | Clip1         | NM_019765    | 1.70472e-007 | 1.39138 | E15.5 * Wnt1 up vs E15.5 * Ctrl |
| 10354267 | A530098C11Rik | NM_001013799 | 0.01016      | 1.39135 | E15.5 * Wnt1 up vs E15.5 * Ctrl |
| 10591164 | ---           | ---          | 0.00705729   | 1.39134 | E15.5 * Wnt1 up vs E15.5 * Ctrl |
| 10584231 | Pus3          | NM_023292    | 0.00469914   | 1.39114 | E15.5 * Wnt1 up vs E15.5 * Ctrl |
| 10367122 | Baz2a         | NM_054078    | 4.81501e-007 | 1.39112 | E15.5 * Wnt1 up vs E15.5 * Ctrl |
| 10535883 | Katnal1       | NM_153572    | 0.00165076   | 1.39074 | E15.5 * Wnt1 up vs E15.5 * Ctrl |
| 10419460 | Ttc5          | NM_177625    | 0.000544746  | 1.39071 | E15.5 * Wnt1 up vs E15.5 * Ctrl |
| 10398267 | Evl           | NM_007965    | 3.30751e-007 | 1.39034 | E15.5 * Wnt1 up vs E15.5 * Ctrl |
| 10533320 | Adam1b        | NM_172125    | 0.00017996   | 1.39032 | E15.5 * Wnt1 up vs E15.5 * Ctrl |
| 10533403 | Cux2          | NM_007804    | 1.28365e-005 | 1.39017 | E15.5 * Wnt1 up vs E15.5 * Ctrl |

|          |               |               |              |         |                                 |
|----------|---------------|---------------|--------------|---------|---------------------------------|
| 10597900 | Zfp445        | NM_173364     | 1.05081e-005 | 1.39007 | E15.5 * Wnt1 up vs E15.5 * Ctrl |
| 10447688 | 4930506C21Rik | AK043779      | 0.0108415    | 1.38971 | E15.5 * Wnt1 up vs E15.5 * Ctrl |
| 10401138 | Atp6v1d       | NM_023721     | 8.27497e-005 | 1.38961 | E15.5 * Wnt1 up vs E15.5 * Ctrl |
| 10592772 | Abcg4         | NM_138955     | 1.70593e-005 | 1.38958 | E15.5 * Wnt1 up vs E15.5 * Ctrl |
| 10388132 | 4933427D14Rik | BC043106      | 6.96393e-006 | 1.38952 | E15.5 * Wnt1 up vs E15.5 * Ctrl |
| 10406825 | Ankra2        | NM_023472     | 0.0032178    | 1.3893  | E15.5 * Wnt1 up vs E15.5 * Ctrl |
| 10578746 | BC088983      | BC088983      | 0.000753867  | 1.38928 | E15.5 * Wnt1 up vs E15.5 * Ctrl |
| 10386230 | Rnf187        | AB030190      | 0.000515366  | 1.38909 | E15.5 * Wnt1 up vs E15.5 * Ctrl |
| 10426242 | Chkb          | NM_007692     | 0.00508515   | 1.38908 | E15.5 * Wnt1 up vs E15.5 * Ctrl |
| 10412155 | Ddx4          | NM_001145885  | 0.00195023   | 1.389   | E15.5 * Wnt1 up vs E15.5 * Ctrl |
| 10419691 | Mettl3        | NM_019721     | 2.99155e-005 | 1.38851 | E15.5 * Wnt1 up vs E15.5 * Ctrl |
| 10582708 | Exoc8         | NM_198103     | 0.000889254  | 1.3884  | E15.5 * Wnt1 up vs E15.5 * Ctrl |
| 10401708 | Ngb           | NM_022414     | 5.24636e-005 | 1.38838 | E15.5 * Wnt1 up vs E15.5 * Ctrl |
| 10558454 | Glrx3         | NM_023140     | 0.00104162   | 1.38824 | E15.5 * Wnt1 up vs E15.5 * Ctrl |
| 10569898 | Evi5l         | NM_001039578  | 2.7517e-006  | 1.38792 | E15.5 * Wnt1 up vs E15.5 * Ctrl |
| 10401939 | Lysmd1        | NM_153121     | 0.000295257  | 1.38787 | E15.5 * Wnt1 up vs E15.5 * Ctrl |
| 10547686 | Vmn2r22       | NM_001104637  | 0.0109265    | 1.38773 | E15.5 * Wnt1 up vs E15.5 * Ctrl |
| 10407209 | 4833412L08Rik | ENSMUST000001 | 0.00102774   | 1.38765 | E15.5 * Wnt1 up vs E15.5 * Ctrl |
| 10531794 | Wdfy3         | AB093277      | 0.000210479  | 1.38747 | E15.5 * Wnt1 up vs E15.5 * Ctrl |
| 10446013 | Mpnd          | NM_026530     | 0.0064868    | 1.38739 | E15.5 * Wnt1 up vs E15.5 * Ctrl |
| 10426425 | Pdzm4         | BC151034      | 0.00946009   | 1.38704 | E15.5 * Wnt1 up vs E15.5 * Ctrl |
| 10590489 | Zfp105        | NM_009544     | 0.0014633    | 1.38691 | E15.5 * Wnt1 up vs E15.5 * Ctrl |
| 10407370 | 4833420G17Rik | NM_001113550  | 0.000863879  | 1.38691 | E15.5 * Wnt1 up vs E15.5 * Ctrl |
| 10409464 | Dbn1          | NM_019813     | 0.00150715   | 1.38665 | E15.5 * Wnt1 up vs E15.5 * Ctrl |
| 10564037 | ---           | ---           | 3.93568e-005 | 1.38655 | E15.5 * Wnt1 up vs E15.5 * Ctrl |
| 10595953 | Fam62c        | NM_177775     | 5.4728e-005  | 1.38648 | E15.5 * Wnt1 up vs E15.5 * Ctrl |
| 10400135 | ---           | ---           | 0.00263556   | 1.38639 | E15.5 * Wnt1 up vs E15.5 * Ctrl |
| 10455071 | Pcdhb7        | NM_053132     | 0.00873756   | 1.3863  | E15.5 * Wnt1 up vs E15.5 * Ctrl |
| 10590909 | Endod1        | NM_028013     | 0.000172496  | 1.38596 | E15.5 * Wnt1 up vs E15.5 * Ctrl |
| 10607524 | Sms           | NM_009214     | 2.70215e-006 | 1.38595 | E15.5 * Wnt1 up vs E15.5 * Ctrl |
| 10495001 | Rsb1          | NM_172684     | 9.05451e-007 | 1.38579 | E15.5 * Wnt1 up vs E15.5 * Ctrl |
| 10582925 | Alkbh8        | NM_026303     | 0.00041505   | 1.38556 | E15.5 * Wnt1 up vs E15.5 * Ctrl |
| 10501754 | D3Bwg0562e    | NM_177664     | 0.00124347   | 1.38549 | E15.5 * Wnt1 up vs E15.5 * Ctrl |
| 10507731 | Rims3         | NM_182929     | 0.000551483  | 1.38476 | E15.5 * Wnt1 up vs E15.5 * Ctrl |
| 10471474 | Ak1           | NM_021515     | 0.00541616   | 1.38476 | E15.5 * Wnt1 up vs E15.5 * Ctrl |
| 10396346 | 1810048J11Rik | NM_026327     | 5.14205e-005 | 1.38475 | E15.5 * Wnt1 up vs E15.5 * Ctrl |
| 10593316 | ---           | ---           | 0.00837286   | 1.38448 | E15.5 * Wnt1 up vs E15.5 * Ctrl |
| 10351525 | Mpz           | NM_008623     | 0.000475107  | 1.38444 | E15.5 * Wnt1 up vs E15.5 * Ctrl |
| 10406856 | Gm807         | ENSMUST000001 | 0.0040914    | 1.38388 | E15.5 * Wnt1 up vs E15.5 * Ctrl |
| 10511414 | ---           | ---           | 0.00562711   | 1.38352 | E15.5 * Wnt1 up vs E15.5 * Ctrl |
| 10368883 | Tdg           | NM_011561     | 1.0681e-005  | 1.38347 | E15.5 * Wnt1 up vs E15.5 * Ctrl |
| 10504551 | Rg9mtd3       | NM_027266     | 9.82548e-005 | 1.3831  | E15.5 * Wnt1 up vs E15.5 * Ctrl |
| 10425966 | Atxn10        | NM_016843     | 4.1252e-006  | 1.38298 | E15.5 * Wnt1 up vs E15.5 * Ctrl |
| 10485151 | Mapk8ip1      | NM_011162     | 0.00132075   | 1.3829  | E15.5 * Wnt1 up vs E15.5 * Ctrl |
| 10462228 | Dmrt3         | NM_177360     | 0.000314175  | 1.38262 | E15.5 * Wnt1 up vs E15.5 * Ctrl |
| 10575745 | Atmin         | NM_177700     | 0.000909262  | 1.3822  | E15.5 * Wnt1 up vs E15.5 * Ctrl |
| 10385236 | Akr1b3        | NM_009658     | 1.20165e-005 | 1.38198 | E15.5 * Wnt1 up vs E15.5 * Ctrl |
| 10512254 | 1110017D15Rik | NM_001048005  | 0.000189111  | 1.38144 | E15.5 * Wnt1 up vs E15.5 * Ctrl |
| 10528527 | Fam126a       | NM_053090     | 0.000240137  | 1.38133 | E15.5 * Wnt1 up vs E15.5 * Ctrl |
| 10491520 | B230207O21Rik | AK140083      | 0.00137707   | 1.38132 | E15.5 * Wnt1 up vs E15.5 * Ctrl |
| 10491551 | Exosc9        | NM_019393     | 0.00050837   | 1.38125 | E15.5 * Wnt1 up vs E15.5 * Ctrl |
| 10605559 | ---           | ---           | 0.00128323   | 1.38115 | E15.5 * Wnt1 up vs E15.5 * Ctrl |
| 10560282 | Grf1          | NM_172739     | 4.10871e-006 | 1.38089 | E15.5 * Wnt1 up vs E15.5 * Ctrl |
| 10379013 | Flot2         | NM_008028     | 0.000551105  | 1.38079 | E15.5 * Wnt1 up vs E15.5 * Ctrl |
| 10472436 | B3galt1       | NM_020283     | 0.00168656   | 1.3805  | E15.5 * Wnt1 up vs E15.5 * Ctrl |
| 10521566 | Tmem128       | NM_025480     | 0.00176765   | 1.38045 | E15.5 * Wnt1 up vs E15.5 * Ctrl |
| 10569848 | Stxbp2        | NM_011503     | 0.00138849   | 1.38043 | E15.5 * Wnt1 up vs E15.5 * Ctrl |
| 10494832 | 5730470L24Rik | NM_025679     | 4.75598e-006 | 1.3802  | E15.5 * Wnt1 up vs E15.5 * Ctrl |
| 10401068 | Spnb1         | NM_013675     | 0.000226311  | 1.38008 | E15.5 * Wnt1 up vs E15.5 * Ctrl |
| 10390780 | Krt222        | NM_172946     | 6.67551e-005 | 1.37942 | E15.5 * Wnt1 up vs E15.5 * Ctrl |
| 10534041 | Stx2          | NM_007941     | 0.00052874   | 1.37928 | E15.5 * Wnt1 up vs E15.5 * Ctrl |
| 10354472 | Gls           | NM_001081081  | 0.0108872    | 1.37918 | E15.5 * Wnt1 up vs E15.5 * Ctrl |
| 10585803 | Stra6         | NM_009291     | 0.00251875   | 1.37912 | E15.5 * Wnt1 up vs E15.5 * Ctrl |
| 10492341 | 4631416L12Rik | NM_001081295  | 0.00445189   | 1.37889 | E15.5 * Wnt1 up vs E15.5 * Ctrl |
| 10362861 | Scml4         | NM_172938     | 6.47089e-006 | 1.37827 | E15.5 * Wnt1 up vs E15.5 * Ctrl |
| 10452047 | Ptpns         | NM_011218     | 0.00611889   | 1.37813 | E15.5 * Wnt1 up vs E15.5 * Ctrl |

|          |               |              |              |         |                                 |
|----------|---------------|--------------|--------------|---------|---------------------------------|
| 10414137 | Grid1         | NM_008166    | 0.000361435  | 1.37783 | E15.5 * Wnt1 up vs E15.5 * Ctrl |
| 10412060 | EG668123      | XR_032565    | 0.00936946   | 1.37771 | E15.5 * Wnt1 up vs E15.5 * Ctrl |
| 10424796 | ENSMUSG0000C  | AK005822     | 0.000286754  | 1.37755 | E15.5 * Wnt1 up vs E15.5 * Ctrl |
| 10471424 | Fam102a       | NM_153560    | 0.00396204   | 1.37734 | E15.5 * Wnt1 up vs E15.5 * Ctrl |
| 10410460 | 3110006E14Rik | NM_001145162 | 0.00243411   | 1.37718 | E15.5 * Wnt1 up vs E15.5 * Ctrl |
| 10411882 | Nln           | NM_029447    | 0.000229917  | 1.37716 | E15.5 * Wnt1 up vs E15.5 * Ctrl |
| 10544732 | Skap2         | NM_018773    | 3.7295e-005  | 1.37708 | E15.5 * Wnt1 up vs E15.5 * Ctrl |
| 10397752 | Calm1         | NM_009790    | 4.19601e-009 | 1.37683 | E15.5 * Wnt1 up vs E15.5 * Ctrl |
| 10462630 | Pank1         | NM_001114339 | 0.00619534   | 1.37681 | E15.5 * Wnt1 up vs E15.5 * Ctrl |
| 10391518 | Mpp3          | NM_007863    | 0.000111884  | 1.37669 | E15.5 * Wnt1 up vs E15.5 * Ctrl |
| 10463875 | Sorcs3        | NM_025696    | 0.00145044   | 1.37669 | E15.5 * Wnt1 up vs E15.5 * Ctrl |
| 10538109 | Al854703      | NR_027236    | 0.000220783  | 1.37655 | E15.5 * Wnt1 up vs E15.5 * Ctrl |
| 10441680 | Pde10a        | NM_011866    | 6.78159e-006 | 1.37637 | E15.5 * Wnt1 up vs E15.5 * Ctrl |
| 10595990 | Armc8         | NM_028768    | 6.69943e-005 | 1.37614 | E15.5 * Wnt1 up vs E15.5 * Ctrl |
| 10427015 | Acvr1b        | NM_007395    | 0.00290573   | 1.37614 | E15.5 * Wnt1 up vs E15.5 * Ctrl |
| 10518473 | Fbxo6         | NM_015797    | 0.000223724  | 1.37596 | E15.5 * Wnt1 up vs E15.5 * Ctrl |
| 10550840 | Zfp112        | NM_021307    | 0.00565711   | 1.37586 | E15.5 * Wnt1 up vs E15.5 * Ctrl |
| 10589494 | Cspg5         | NM_013884    | 0.00120928   | 1.37515 | E15.5 * Wnt1 up vs E15.5 * Ctrl |
| 10585889 | Bruno16       | NM_175235    | 0.000108996  | 1.3748  | E15.5 * Wnt1 up vs E15.5 * Ctrl |
| 10501282 | Cyb561d1      | NM_001081320 | 0.000323038  | 1.37479 | E15.5 * Wnt1 up vs E15.5 * Ctrl |
| 10536297 | Ppp1r9a       | NM_181595    | 1.12645e-005 | 1.37464 | E15.5 * Wnt1 up vs E15.5 * Ctrl |
| 10553115 | Lmtk3         | NM_001005511 | 1.25687e-006 | 1.37458 | E15.5 * Wnt1 up vs E15.5 * Ctrl |
| 10447923 | Tcte2         | NM_022311    | 1.72653e-005 | 1.37438 | E15.5 * Wnt1 up vs E15.5 * Ctrl |
| 10448455 | Atp6v0c       | NM_009729    | 0.00382884   | 1.37419 | E15.5 * Wnt1 up vs E15.5 * Ctrl |
| 10580771 | Ciapi1        | NM_134141    | 1.96522e-006 | 1.37418 | E15.5 * Wnt1 up vs E15.5 * Ctrl |
| 10552252 | 1600014C10Rik | NM_001085385 | 1.56599e-006 | 1.37398 | E15.5 * Wnt1 up vs E15.5 * Ctrl |
| 10485013 | 1110051M20Rik | NM_175123    | 1.63394e-006 | 1.37374 | E15.5 * Wnt1 up vs E15.5 * Ctrl |
| 10538420 | Gars          | NM_180678    | 8.91734e-007 | 1.37295 | E15.5 * Wnt1 up vs E15.5 * Ctrl |
| 10506335 | Pde4b         | NM_019840    | 0.00192609   | 1.37277 | E15.5 * Wnt1 up vs E15.5 * Ctrl |
| 10503709 | D130062J21Rik | AK051661     | 0.00926499   | 1.37223 | E15.5 * Wnt1 up vs E15.5 * Ctrl |
| 10478364 | Tox2          | NM_001098799 | 0.000477039  | 1.3721  | E15.5 * Wnt1 up vs E15.5 * Ctrl |
| 10453573 | Olfir63       | NM_146937    | 0.00231139   | 1.37194 | E15.5 * Wnt1 up vs E15.5 * Ctrl |
| 10524882 | Wsb2          | NM_021539    | 0.000957356  | 1.37193 | E15.5 * Wnt1 up vs E15.5 * Ctrl |
| 10515519 | Atp6v0b       | NM_033617    | 0.00115296   | 1.37172 | E15.5 * Wnt1 up vs E15.5 * Ctrl |
| 10390574 | Fbxl20        | NM_028149    | 0.000219036  | 1.37148 | E15.5 * Wnt1 up vs E15.5 * Ctrl |
| 10579872 | Tpd52         | NM_001025263 | 0.00254535   | 1.3705  | E15.5 * Wnt1 up vs E15.5 * Ctrl |
| 10504206 | N28178        | BC057092     | 0.00127722   | 1.37033 | E15.5 * Wnt1 up vs E15.5 * Ctrl |
| 10574166 | Cpne2         | NM_153507    | 7.75776e-005 | 1.37009 | E15.5 * Wnt1 up vs E15.5 * Ctrl |
| 10402761 | Tmem179       | NM_178915    | 0.000335005  | 1.3699  | E15.5 * Wnt1 up vs E15.5 * Ctrl |
| 10363486 | Lrrc20        | NM_153542    | 0.000471563  | 1.36969 | E15.5 * Wnt1 up vs E15.5 * Ctrl |
| 10430660 | Pdgfb         | NM_011057    | 0.000617395  | 1.36948 | E15.5 * Wnt1 up vs E15.5 * Ctrl |
| 10442643 | Nme3          | NM_019730    | 3.70411e-005 | 1.3693  | E15.5 * Wnt1 up vs E15.5 * Ctrl |
| 10532576 | Myo18b        | BC145218     | 0.00622315   | 1.36918 | E15.5 * Wnt1 up vs E15.5 * Ctrl |
| 10591161 | Zfp558        | ENSMUST00000 | 0.00600184   | 1.36912 | E15.5 * Wnt1 up vs E15.5 * Ctrl |
| 10599120 | Dock11        | NM_001009947 | 0.000560602  | 1.36848 | E15.5 * Wnt1 up vs E15.5 * Ctrl |
| 10528268 | Ptpn12        | NM_011203    | 3.11582e-006 | 1.36832 | E15.5 * Wnt1 up vs E15.5 * Ctrl |
| 10442649 | Mapk8ip3      | NM_013931    | 0.00344571   | 1.3683  | E15.5 * Wnt1 up vs E15.5 * Ctrl |
| 10448694 | Syng3         | NM_011522    | 0.000663935  | 1.36813 | E15.5 * Wnt1 up vs E15.5 * Ctrl |
| 10512612 | 4930412F15Rik | NM_175517    | 0.00102724   | 1.36773 | E15.5 * Wnt1 up vs E15.5 * Ctrl |
| 10533474 | 1500011H22Rik | BC019498     | 0.000599306  | 1.36768 | E15.5 * Wnt1 up vs E15.5 * Ctrl |
| 10401365 | Zfyve1        | NM_183154    | 0.000844434  | 1.36759 | E15.5 * Wnt1 up vs E15.5 * Ctrl |
| 10450996 | Gpr111        | NM_001033493 | 0.0010993    | 1.36757 | E15.5 * Wnt1 up vs E15.5 * Ctrl |
| 10526735 | Zscan21       | NM_011757    | 0.00324849   | 1.36754 | E15.5 * Wnt1 up vs E15.5 * Ctrl |
| 10542200 | Gabarapl1     | NM_020590    | 0.000168616  | 1.36748 | E15.5 * Wnt1 up vs E15.5 * Ctrl |
| 10385716 | 0610009B22Rik | NM_025319    | 0.000565332  | 1.36714 | E15.5 * Wnt1 up vs E15.5 * Ctrl |
| 10414374 | Ktn1          | NM_008477    | 3.96196e-006 | 1.36709 | E15.5 * Wnt1 up vs E15.5 * Ctrl |
| 10522217 | Limch1        | NM_001001980 | 0.000653499  | 1.36704 | E15.5 * Wnt1 up vs E15.5 * Ctrl |
| 10527538 | Rasl11a       | NM_026864    | 0.0029942    | 1.36625 | E15.5 * Wnt1 up vs E15.5 * Ctrl |
| 10388042 | 6330403K07Rik | NM_134022    | 1.79536e-005 | 1.36613 | E15.5 * Wnt1 up vs E15.5 * Ctrl |
| 10430871 | Tdg           | NM_011561    | 9.42562e-006 | 1.36582 | E15.5 * Wnt1 up vs E15.5 * Ctrl |
| 10502845 | Fam73a        | BC098205     | 0.000420889  | 1.36561 | E15.5 * Wnt1 up vs E15.5 * Ctrl |
| 10464688 | Ankrd13d      | NM_026720    | 0.00064408   | 1.36505 | E15.5 * Wnt1 up vs E15.5 * Ctrl |
| 10415911 | Kif13b        | NM_001081177 | 0.00295231   | 1.36498 | E15.5 * Wnt1 up vs E15.5 * Ctrl |
| 10582180 | Fam92b        | NM_001033980 | 0.00427325   | 1.36479 | E15.5 * Wnt1 up vs E15.5 * Ctrl |
| 10396094 | Klhdcc2       | NM_027117    | 3.41909e-007 | 1.36468 | E15.5 * Wnt1 up vs E15.5 * Ctrl |
| 10540540 | 0610010K06Rik | NM_027861    | 9.85683e-005 | 1.36463 | E15.5 * Wnt1 up vs E15.5 * Ctrl |

|          |               |              |              |         |                                 |
|----------|---------------|--------------|--------------|---------|---------------------------------|
| 10408677 | Lymr4         | NM_201358    | 0.000419365  | 1.36453 | E15.5 * Wnt1 up vs E15.5 * Ctrl |
| 10452538 | 1110012J17Rik | NM_001114098 | 4.19109e-006 | 1.36428 | E15.5 * Wnt1 up vs E15.5 * Ctrl |
| 10578324 | Mtus1         | NM_001005863 | 4.2587e-005  | 1.36403 | E15.5 * Wnt1 up vs E15.5 * Ctrl |
| 10412267 | Itga2         | NM_008396    | 0.000639533  | 1.36398 | E15.5 * Wnt1 up vs E15.5 * Ctrl |
| 10367349 | Smarcc2       | NM_001114097 | 0.000269155  | 1.36397 | E15.5 * Wnt1 up vs E15.5 * Ctrl |
| 10373964 | Thoc5         | NM_172438    | 0.000671503  | 1.36379 | E15.5 * Wnt1 up vs E15.5 * Ctrl |
| 10394862 | Ddef2         | NM_001135192 | 9.58609e-006 | 1.36355 | E15.5 * Wnt1 up vs E15.5 * Ctrl |
| 10514158 | Psip1         | NM_133948    | 8.8739e-006  | 1.36351 | E15.5 * Wnt1 up vs E15.5 * Ctrl |
| 10394286 | 2410017P09Rik | BC067010     | 0.0121371    | 1.36337 | E15.5 * Wnt1 up vs E15.5 * Ctrl |
| 10357280 | Insig2        | NM_133748    | 0.00030056   | 1.36324 | E15.5 * Wnt1 up vs E15.5 * Ctrl |
| 10368011 | Vta1          | NM_025418    | 4.86652e-005 | 1.36321 | E15.5 * Wnt1 up vs E15.5 * Ctrl |
| 10598562 | B630019K06Rik | NM_175327    | 0.000530587  | 1.36268 | E15.5 * Wnt1 up vs E15.5 * Ctrl |
| 10481621 | 1110008P14Rik | NM_198001    | 0.000256502  | 1.3624  | E15.5 * Wnt1 up vs E15.5 * Ctrl |
| 10448232 | ---           | ---          | 0.000340592  | 1.36189 | E15.5 * Wnt1 up vs E15.5 * Ctrl |
| 10593937 | Mpi           | NM_025837    | 0.000216308  | 1.36179 | E15.5 * Wnt1 up vs E15.5 * Ctrl |
| 10397000 | ---           | ---          | 0.00280299   | 1.36162 | E15.5 * Wnt1 up vs E15.5 * Ctrl |
| 10489053 | 4930518I15Rik | ENSMUST00000 | 0.00465687   | 1.36131 | E15.5 * Wnt1 up vs E15.5 * Ctrl |
| 10499470 | Rusc1         | NM_028188    | 0.000221856  | 1.36099 | E15.5 * Wnt1 up vs E15.5 * Ctrl |
| 10487441 | Mal           | NM_010762    | 0.00676504   | 1.36086 | E15.5 * Wnt1 up vs E15.5 * Ctrl |
| 10468231 | Arl3          | NM_019718    | 2.52195e-005 | 1.3607  | E15.5 * Wnt1 up vs E15.5 * Ctrl |
| 10515168 | Cyp4x1        | NM_001003947 | 0.000114312  | 1.36056 | E15.5 * Wnt1 up vs E15.5 * Ctrl |
| 10551483 | Eid2          | NM_198425    | 0.000346691  | 1.36019 | E15.5 * Wnt1 up vs E15.5 * Ctrl |
| 10596925 | Ndufaf3       | NM_023247    | 0.00321133   | 1.35991 | E15.5 * Wnt1 up vs E15.5 * Ctrl |
| 10547469 | Hsn2          | NM_001037155 | 0.0128564    | 1.35987 | E15.5 * Wnt1 up vs E15.5 * Ctrl |
| 10553646 | Herc2         | NM_010418    | 1.61633e-007 | 1.35983 | E15.5 * Wnt1 up vs E15.5 * Ctrl |
| 10447477 | ENSMUSG00000  | ENSMUST00000 | 0.0122736    | 1.35976 | E15.5 * Wnt1 up vs E15.5 * Ctrl |
| 10503828 | Lymr2         | NM_175364    | 0.00263614   | 1.35973 | E15.5 * Wnt1 up vs E15.5 * Ctrl |
| 10569542 | Mrgpre        | NM_175534    | 0.00451926   | 1.359   | E15.5 * Wnt1 up vs E15.5 * Ctrl |
| 10493770 | Ilf2          | NM_026374    | 2.3912e-005  | 1.35884 | E15.5 * Wnt1 up vs E15.5 * Ctrl |
| 10544452 | Fam115c       | BC011487     | 0.00291983   | 1.35876 | E15.5 * Wnt1 up vs E15.5 * Ctrl |
| 10422980 | Lmbrd2        | NM_177178    | 6.99815e-005 | 1.35828 | E15.5 * Wnt1 up vs E15.5 * Ctrl |
| 10554094 | Igf1r         | NM_010513    | 0.00248226   | 1.35828 | E15.5 * Wnt1 up vs E15.5 * Ctrl |
| 10516371 | Eif2c1        | NM_153403    | 0.00142008   | 1.35827 | E15.5 * Wnt1 up vs E15.5 * Ctrl |
| 10406280 | Spat9         | NM_029343    | 0.000875271  | 1.35775 | E15.5 * Wnt1 up vs E15.5 * Ctrl |
| 10409767 | Golm1         | NM_027307    | 0.001816     | 1.35739 | E15.5 * Wnt1 up vs E15.5 * Ctrl |
| 10434845 | Il1rap        | NM_008364    | 0.000230343  | 1.35713 | E15.5 * Wnt1 up vs E15.5 * Ctrl |
| 10512739 | Xpa           | NM_011728    | 0.00562194   | 1.35709 | E15.5 * Wnt1 up vs E15.5 * Ctrl |
| 10544763 | Hoxa4         | NM_008265    | 0.0002511    | 1.35704 | E15.5 * Wnt1 up vs E15.5 * Ctrl |
| 10405280 | Arl10         | NM_019968    | 0.0036867    | 1.35697 | E15.5 * Wnt1 up vs E15.5 * Ctrl |
| 10557498 | Fam57b        | NM_026884    | 0.00174251   | 1.35667 | E15.5 * Wnt1 up vs E15.5 * Ctrl |
| 10456764 | Smad2         | NM_010754    | 6.22562e-006 | 1.35667 | E15.5 * Wnt1 up vs E15.5 * Ctrl |
| 10565193 | Hdgfrp3       | NM_013886    | 6.8412e-005  | 1.35632 | E15.5 * Wnt1 up vs E15.5 * Ctrl |
| 10538617 | Lancl2        | NM_133737    | 3.93579e-006 | 1.35605 | E15.5 * Wnt1 up vs E15.5 * Ctrl |
| 10442468 | Caskin1       | NM_027937    | 5.41165e-005 | 1.35598 | E15.5 * Wnt1 up vs E15.5 * Ctrl |
| 10428439 | ---           | ---          | 0.0040914    | 1.35563 | E15.5 * Wnt1 up vs E15.5 * Ctrl |
| 10531631 | ---           | ---          | 0.0147091    | 1.35559 | E15.5 * Wnt1 up vs E15.5 * Ctrl |
| 10376420 | OTTMUSG00000  | ENSMUST00000 | 0.0133913    | 1.35515 | E15.5 * Wnt1 up vs E15.5 * Ctrl |
| 10486262 | Ltk           | NM_203345    | 6.79515e-006 | 1.3551  | E15.5 * Wnt1 up vs E15.5 * Ctrl |
| 10583773 | BC018242      | NM_144935    | 2.67962e-006 | 1.35499 | E15.5 * Wnt1 up vs E15.5 * Ctrl |
| 10546557 | Fam19a4       | NM_177233    | 0.000763003  | 1.35484 | E15.5 * Wnt1 up vs E15.5 * Ctrl |
| 10402648 | Brp44l        | NM_018819    | 0.00181792   | 1.35479 | E15.5 * Wnt1 up vs E15.5 * Ctrl |
| 10524234 | Galnt9        | NM_198306    | 0.000777636  | 1.3547  | E15.5 * Wnt1 up vs E15.5 * Ctrl |
| 10446071 | Fem1a         | NM_010192    | 0.00176379   | 1.35459 | E15.5 * Wnt1 up vs E15.5 * Ctrl |
| 10357946 | Ppp1r12b      | NM_001081307 | 0.00134914   | 1.35443 | E15.5 * Wnt1 up vs E15.5 * Ctrl |
| 10410995 | Rasgrf2       | NM_009027    | 0.000181737  | 1.35416 | E15.5 * Wnt1 up vs E15.5 * Ctrl |
| 10500534 | Hsd3b4        | NM_001111336 | 0.00032999   | 1.35407 | E15.5 * Wnt1 up vs E15.5 * Ctrl |
| 10500539 | Hsd3b4        | NM_001111336 | 0.00032999   | 1.35407 | E15.5 * Wnt1 up vs E15.5 * Ctrl |
| 10425559 | L3mbtl2       | NM_145993    | 3.95995e-005 | 1.35403 | E15.5 * Wnt1 up vs E15.5 * Ctrl |
| 10542040 | Parp11        | NM_181402    | 0.00664761   | 1.35403 | E15.5 * Wnt1 up vs E15.5 * Ctrl |
| 10575249 | Txn14b        | NM_175646    | 0.000581922  | 1.35376 | E15.5 * Wnt1 up vs E15.5 * Ctrl |
| 10601235 | Ogt           | NM_139144    | 8.63837e-007 | 1.35371 | E15.5 * Wnt1 up vs E15.5 * Ctrl |
| 10388749 | Traf4         | NM_009423    | 0.00102353   | 1.35371 | E15.5 * Wnt1 up vs E15.5 * Ctrl |
| 10475245 | AV039307      | AK006022     | 0.00112767   | 1.3534  | E15.5 * Wnt1 up vs E15.5 * Ctrl |
| 10591517 | Cdkn2d        | NM_009878    | 0.000102161  | 1.35332 | E15.5 * Wnt1 up vs E15.5 * Ctrl |
| 10401891 | Ston2         | NM_175367    | 0.000794239  | 1.35289 | E15.5 * Wnt1 up vs E15.5 * Ctrl |
| 10592023 | Aplp2         | NM_001102455 | 0.000190556  | 1.35287 | E15.5 * Wnt1 up vs E15.5 * Ctrl |

|                        |              |              |         |                                 |
|------------------------|--------------|--------------|---------|---------------------------------|
| 10358593 Hmcn1         | NM_001024720 | 0.00597852   | 1.35286 | E15.5 * Wnt1 up vs E15.5 * Ctrl |
| 10586920 Rfx7          | NM_001033536 | 7.80366e-006 | 1.35279 | E15.5 * Wnt1 up vs E15.5 * Ctrl |
| 10379901 Bcas3         | NM_138681    | 0.000152262  | 1.35245 | E15.5 * Wnt1 up vs E15.5 * Ctrl |
| 10586616 Vps13c        | NM_177184    | 0.000211265  | 1.35237 | E15.5 * Wnt1 up vs E15.5 * Ctrl |
| 10510552 Rere          | NM_001085492 | 0.000117372  | 1.35234 | E15.5 * Wnt1 up vs E15.5 * Ctrl |
| 10522250 Tmem33        | NM_028975    | 0.000154991  | 1.35211 | E15.5 * Wnt1 up vs E15.5 * Ctrl |
| 10538519 Gsbs          | NM_011153    | 0.00939622   | 1.35193 | E15.5 * Wnt1 up vs E15.5 * Ctrl |
| 10413171               | ---          | 0.000428209  | 1.3519  | E15.5 * Wnt1 up vs E15.5 * Ctrl |
| 10399421 Mycn          | NM_008709    | 0.00121226   | 1.35158 | E15.5 * Wnt1 up vs E15.5 * Ctrl |
| 10568792 Stk32c        | NM_021302    | 0.00358649   | 1.35148 | E15.5 * Wnt1 up vs E15.5 * Ctrl |
| 10432593 Csrnp2        | NM_153407    | 3.91263e-008 | 1.35077 | E15.5 * Wnt1 up vs E15.5 * Ctrl |
| 10441361 Tiam2         | NM_001122998 | 0.00116727   | 1.3507  | E15.5 * Wnt1 up vs E15.5 * Ctrl |
| 10579910 Zc3h15        | NM_026934    | 0.00025335   | 1.35065 | E15.5 * Wnt1 up vs E15.5 * Ctrl |
| 10448765 Mapk8ip3      | NM_013931    | 2.19843e-005 | 1.3505  | E15.5 * Wnt1 up vs E15.5 * Ctrl |
| 10538299 Hoxa3         | NM_010452    | 0.000327313  | 1.3505  | E15.5 * Wnt1 up vs E15.5 * Ctrl |
| 10357191 Ptpn4         | NM_019933    | 0.00073387   | 1.35034 | E15.5 * Wnt1 up vs E15.5 * Ctrl |
| 10517053 Trnp1         | NM_001081156 | 0.00280367   | 1.35026 | E15.5 * Wnt1 up vs E15.5 * Ctrl |
| 10375980 Aff4          | NM_033565    | 5.09353e-006 | 1.35019 | E15.5 * Wnt1 up vs E15.5 * Ctrl |
| 10592493 4931429111Rik | NM_001081121 | 7.07611e-005 | 1.35015 | E15.5 * Wnt1 up vs E15.5 * Ctrl |
| 10602716 Ubqln2        | NM_018798    | 9.7316e-005  | 1.3501  | E15.5 * Wnt1 up vs E15.5 * Ctrl |
| 10461051 5730409K12Rik | AK134852     | 0.0106081    | 1.34996 | E15.5 * Wnt1 up vs E15.5 * Ctrl |
| 10406590 Ankrd34b      | NM_175455    | 0.00113433   | 1.34987 | E15.5 * Wnt1 up vs E15.5 * Ctrl |
| 10387111 2310004I24Rik | NM_025510    | 0.00127224   | 1.34985 | E15.5 * Wnt1 up vs E15.5 * Ctrl |
| 10356932 D1Ert622e     | BC023951     | 0.000996507  | 1.34975 | E15.5 * Wnt1 up vs E15.5 * Ctrl |
| 10519138 ENSMUSG0000C  | ENSMUST00000 | 0.00227699   | 1.34966 | E15.5 * Wnt1 up vs E15.5 * Ctrl |
| 10606445 Rps6ka6       | NM_025949    | 0.000164524  | 1.34942 | E15.5 * Wnt1 up vs E15.5 * Ctrl |
| 10455967 2610318N02Rik | BC039993     | 0.0088996    | 1.3493  | E15.5 * Wnt1 up vs E15.5 * Ctrl |
| 10448369 Flywch1       | NM_153791    | 4.19317e-005 | 1.34921 | E15.5 * Wnt1 up vs E15.5 * Ctrl |
| 10572050 March1        | NM_175188    | 0.000263756  | 1.3492  | E15.5 * Wnt1 up vs E15.5 * Ctrl |
| 10389680 Msi2          | NM_054043    | 5.05768e-005 | 1.34919 | E15.5 * Wnt1 up vs E15.5 * Ctrl |
| 10415163 Dhrrs2        | NM_027790    | 0.000851116  | 1.34918 | E15.5 * Wnt1 up vs E15.5 * Ctrl |
| 10464917 Cnih2         | NM_009920    | 7.34449e-005 | 1.34903 | E15.5 * Wnt1 up vs E15.5 * Ctrl |
| 10456501 Rnmt          | NM_026440    | 0.00032497   | 1.34898 | E15.5 * Wnt1 up vs E15.5 * Ctrl |
| 10383920 Nefh          | NM_010904    | 0.00106948   | 1.34893 | E15.5 * Wnt1 up vs E15.5 * Ctrl |
| 10436967 Cbr1          | NM_007620    | 0.00258688   | 1.34837 | E15.5 * Wnt1 up vs E15.5 * Ctrl |
| 10372524 4933416C03Rik | NR_003651    | 0.00116664   | 1.34822 | E15.5 * Wnt1 up vs E15.5 * Ctrl |
| 10589438 Mtap4         | NM_008633    | 4.04853e-005 | 1.34821 | E15.5 * Wnt1 up vs E15.5 * Ctrl |
| 10358155 2310006M14Rik | AK009188     | 0.00132237   | 1.34815 | E15.5 * Wnt1 up vs E15.5 * Ctrl |
| 10388861 Tmem199       | NM_199199    | 0.0113286    | 1.34801 | E15.5 * Wnt1 up vs E15.5 * Ctrl |
| 10577999 Unc5d         | NM_153135    | 0.00466824   | 1.34788 | E15.5 * Wnt1 up vs E15.5 * Ctrl |
| 10454298 Zfp397        | NM_027007    | 2.01879e-006 | 1.34775 | E15.5 * Wnt1 up vs E15.5 * Ctrl |
| 10371188 Brunol5       | NM_176954    | 7.04399e-005 | 1.34766 | E15.5 * Wnt1 up vs E15.5 * Ctrl |
| 10581737 Ddx19b        | NM_172284    | 0.00102374   | 1.34762 | E15.5 * Wnt1 up vs E15.5 * Ctrl |
| 10497996 Ikzf5         | NM_175115    | 0.000631133  | 1.34754 | E15.5 * Wnt1 up vs E15.5 * Ctrl |
| 10389865 Nme1          | NM_008704    | 3.15761e-007 | 1.34706 | E15.5 * Wnt1 up vs E15.5 * Ctrl |
| 10493245 Mex3a         | NM_001029890 | 8.69675e-005 | 1.34692 | E15.5 * Wnt1 up vs E15.5 * Ctrl |
| 10380637 Hoxb6         | NM_008269    | 0.000800556  | 1.34652 | E15.5 * Wnt1 up vs E15.5 * Ctrl |
| 10578962 ENSMUSG0000C  | ENSMUST00000 | 0.010595     | 1.34644 | E15.5 * Wnt1 up vs E15.5 * Ctrl |
| 10499483 Fdps          | NM_134469    | 0.000139467  | 1.34641 | E15.5 * Wnt1 up vs E15.5 * Ctrl |
| 10347232 Xrcc5         | NM_009533    | 4.07035e-005 | 1.34637 | E15.5 * Wnt1 up vs E15.5 * Ctrl |
| 10405693 Dapk1         | NM_029653    | 9.63854e-009 | 1.34632 | E15.5 * Wnt1 up vs E15.5 * Ctrl |
| 10407513 Wdr37         | NM_172445    | 0.000243232  | 1.34596 | E15.5 * Wnt1 up vs E15.5 * Ctrl |
| 10576118 9330133O14Rik | BC094355     | 0.000106466  | 1.34583 | E15.5 * Wnt1 up vs E15.5 * Ctrl |
| 10604844 Sms           | NM_009214    | 1.93424e-005 | 1.34581 | E15.5 * Wnt1 up vs E15.5 * Ctrl |
| 10389010 5730455P16Rik | NM_027472    | 0.0042011    | 1.34571 | E15.5 * Wnt1 up vs E15.5 * Ctrl |
| 10459804 Katnal2       | NM_027721    | 0.00473004   | 1.34542 | E15.5 * Wnt1 up vs E15.5 * Ctrl |
| 10550931 Irgg          | NM_153134    | 0.000809068  | 1.34528 | E15.5 * Wnt1 up vs E15.5 * Ctrl |
| 10532753 Coro1c        | NM_011779    | 0.00225225   | 1.34519 | E15.5 * Wnt1 up vs E15.5 * Ctrl |
| 10411958 Rnf180        | NM_027934    | 0.000160159  | 1.34511 | E15.5 * Wnt1 up vs E15.5 * Ctrl |
| 10473272 Zc3h15        | NM_026934    | 5.95728e-006 | 1.34497 | E15.5 * Wnt1 up vs E15.5 * Ctrl |
| 10488266 6330439K17Rik | NM_172859    | 0.000677217  | 1.34489 | E15.5 * Wnt1 up vs E15.5 * Ctrl |
| 10477994 Ctnnb1        | NM_025680    | 0.000134331  | 1.34483 | E15.5 * Wnt1 up vs E15.5 * Ctrl |
| 10536401 Nxph1         | NM_008751    | 0.000547885  | 1.34478 | E15.5 * Wnt1 up vs E15.5 * Ctrl |
| 10569767 Zfp358        | NM_080461    | 0.00394471   | 1.34464 | E15.5 * Wnt1 up vs E15.5 * Ctrl |
| 10391540 Mpp2          | NM_016695    | 0.0014117    | 1.34457 | E15.5 * Wnt1 up vs E15.5 * Ctrl |
| 10351825 Tagln2        | NM_178598    | 0.00255322   | 1.34443 | E15.5 * Wnt1 up vs E15.5 * Ctrl |

|          |               |              |              |         |                                 |
|----------|---------------|--------------|--------------|---------|---------------------------------|
| 10450796 | Armcx5        | NM_001009575 | 0.0116008    | 1.3443  | E15.5 * Wnt1 up vs E15.5 * Ctrl |
| 10585444 | Ireb2         | NM_022655    | 0.000241916  | 1.34429 | E15.5 * Wnt1 up vs E15.5 * Ctrl |
| 10405355 | Unc5a         | NM_153131    | 0.000907233  | 1.34422 | E15.5 * Wnt1 up vs E15.5 * Ctrl |
| 10357590 | Dyrk3         | NM_145508    | 0.0117094    | 1.34421 | E15.5 * Wnt1 up vs E15.5 * Ctrl |
| 10436416 | Gabbr3        | NM_001081190 | 0.00282751   | 1.34417 | E15.5 * Wnt1 up vs E15.5 * Ctrl |
| 10573823 | Chd9          | NM_177224    | 3.15312e-005 | 1.34407 | E15.5 * Wnt1 up vs E15.5 * Ctrl |
| 10378914 | Myo18a        | NM_011586    | 8.55061e-006 | 1.34406 | E15.5 * Wnt1 up vs E15.5 * Ctrl |
| 10468200 | Cuedc2        | NM_024192    | 9.08463e-005 | 1.34393 | E15.5 * Wnt1 up vs E15.5 * Ctrl |
| 10512327 | 4933409K07Rik | BC072647     | 0.00074197   | 1.34388 | E15.5 * Wnt1 up vs E15.5 * Ctrl |
| 10495243 | Gstm5         | NM_010360    | 2.53185e-005 | 1.3437  | E15.5 * Wnt1 up vs E15.5 * Ctrl |
| 10564663 | Tdg           | NM_172552    | 0.000151114  | 1.34318 | E15.5 * Wnt1 up vs E15.5 * Ctrl |
| 10533729 | Vps37b        | NM_177876    | 0.0021102    | 1.34318 | E15.5 * Wnt1 up vs E15.5 * Ctrl |
| 10381140 | Ttc25         | NM_028918    | 0.00125767   | 1.34316 | E15.5 * Wnt1 up vs E15.5 * Ctrl |
| 10550519 | Nanos2        | NM_194064    | 0.000497271  | 1.34304 | E15.5 * Wnt1 up vs E15.5 * Ctrl |
| 10532596 | Myo18b        | BC145218     | 0.00476214   | 1.34302 | E15.5 * Wnt1 up vs E15.5 * Ctrl |
| 10436941 | Mrps6         | NM_080456    | 0.00430031   | 1.34281 | E15.5 * Wnt1 up vs E15.5 * Ctrl |
| 10591643 | Rab3d         | NM_031874    | 8.3277e-005  | 1.34269 | E15.5 * Wnt1 up vs E15.5 * Ctrl |
| 10401753 | Al413782      | NM_001142580 | 0.00108914   | 1.34263 | E15.5 * Wnt1 up vs E15.5 * Ctrl |
| 10545638 | Tlx2          | NM_009392    | 0.000816847  | 1.34232 | E15.5 * Wnt1 up vs E15.5 * Ctrl |
| 10607585 | OTTMUSG00000  | NM_001112661 | 0.00380892   | 1.34198 | E15.5 * Wnt1 up vs E15.5 * Ctrl |
| 10455253 | EG545253      | NM_001033789 | 0.00621091   | 1.34182 | E15.5 * Wnt1 up vs E15.5 * Ctrl |
| 10477004 | LOC100044416  | XR_030619    | 1.31294e-006 | 1.34175 | E15.5 * Wnt1 up vs E15.5 * Ctrl |
| 10593103 | Rnf214        | NM_178709    | 6.01555e-005 | 1.34167 | E15.5 * Wnt1 up vs E15.5 * Ctrl |
| 10454235 | Asxl3         | ENSMUST00000 | 0.000259646  | 1.34122 | E15.5 * Wnt1 up vs E15.5 * Ctrl |
| 10529567 | D5ErtD579e    | NM_001081232 | 9.10388e-006 | 1.34118 | E15.5 * Wnt1 up vs E15.5 * Ctrl |
| 10600144 | F8a           | NM_007978    | 0.00390271   | 1.34096 | E15.5 * Wnt1 up vs E15.5 * Ctrl |
| 10421924 | Pcdh9         | NM_001081377 | 0.00348892   | 1.34093 | E15.5 * Wnt1 up vs E15.5 * Ctrl |
| 10423745 | Spag1         | NM_012031    | 0.00764174   | 1.34084 | E15.5 * Wnt1 up vs E15.5 * Ctrl |
| 10429222 | Fam135b       | NM_177819    | 0.00110073   | 1.34077 | E15.5 * Wnt1 up vs E15.5 * Ctrl |
| 10395039 | Cmpk2         | NM_020557    | 0.000707087  | 1.3405  | E15.5 * Wnt1 up vs E15.5 * Ctrl |
| 10534120 | Asl           | NM_133768    | 0.000769211  | 1.34035 | E15.5 * Wnt1 up vs E15.5 * Ctrl |
| 10380303 | Car10         | NM_028296    | 0.000648114  | 1.34006 | E15.5 * Wnt1 up vs E15.5 * Ctrl |
| 10396694 | Churc1        | NM_206534    | 0.00124766   | 1.34002 | E15.5 * Wnt1 up vs E15.5 * Ctrl |
| 10557399 | Sbk1          | NM_145587    | 0.000199924  | 1.34    | E15.5 * Wnt1 up vs E15.5 * Ctrl |
| 10400572 | Klhl28        | NM_025707    | 0.00835913   | 1.3399  | E15.5 * Wnt1 up vs E15.5 * Ctrl |
| 10592701 | Tmem136       | NM_001034863 | 0.000109213  | 1.33983 | E15.5 * Wnt1 up vs E15.5 * Ctrl |
| 10583384 | ---           | ---          | 0.0119976    | 1.33977 | E15.5 * Wnt1 up vs E15.5 * Ctrl |
| 10349016 | 2310035C23Rik | NM_173187    | 0.00528165   | 1.33962 | E15.5 * Wnt1 up vs E15.5 * Ctrl |
| 10507983 | Epha10        | NM_177671    | 0.00254863   | 1.33961 | E15.5 * Wnt1 up vs E15.5 * Ctrl |
| 10390768 | Smarce1       | NM_020618    | 5.98651e-006 | 1.33956 | E15.5 * Wnt1 up vs E15.5 * Ctrl |
| 10400718 | Sos2          | NM_001135559 | 0.00306555   | 1.33954 | E15.5 * Wnt1 up vs E15.5 * Ctrl |
| 10497689 | Gnb4          | NM_013531    | 0.000212671  | 1.33934 | E15.5 * Wnt1 up vs E15.5 * Ctrl |
| 10366514 | Kcnmb4        | NM_021452    | 0.00287553   | 1.33902 | E15.5 * Wnt1 up vs E15.5 * Ctrl |
| 10477485 | 2310021H06Rik | NM_025990    | 0.00074523   | 1.33898 | E15.5 * Wnt1 up vs E15.5 * Ctrl |
| 10532368 | 2410025L10Rik | NM_001142642 | 1.30773e-005 | 1.33818 | E15.5 * Wnt1 up vs E15.5 * Ctrl |
| 10430132 | Zfp647        | NM_172817    | 0.000718913  | 1.33796 | E15.5 * Wnt1 up vs E15.5 * Ctrl |
| 10523766 | Lrrc8c        | NM_133897    | 0.0100092    | 1.33757 | E15.5 * Wnt1 up vs E15.5 * Ctrl |
| 10516305 | Mtap7d1       | NM_144941    | 8.01806e-006 | 1.33749 | E15.5 * Wnt1 up vs E15.5 * Ctrl |
| 10444079 | Rgl2          | NM_009059    | 0.00289984   | 1.33729 | E15.5 * Wnt1 up vs E15.5 * Ctrl |
| 10474977 | 1500003O03Rik | NM_019769    | 8.54383e-005 | 1.33726 | E15.5 * Wnt1 up vs E15.5 * Ctrl |
| 10405662 | Mak10         | NM_030153    | 1.19834e-006 | 1.33703 | E15.5 * Wnt1 up vs E15.5 * Ctrl |
| 10554076 | Lysmd4        | NM_175215    | 0.00354963   | 1.33694 | E15.5 * Wnt1 up vs E15.5 * Ctrl |
| 10402708 | Ckb           | NM_021273    | 0.00760587   | 1.33688 | E15.5 * Wnt1 up vs E15.5 * Ctrl |
| 10579987 | Scoc          | NM_001039137 | 0.00488664   | 1.33686 | E15.5 * Wnt1 up vs E15.5 * Ctrl |
| 10504703 | AU014645      | NM_001033201 | 4.96228e-005 | 1.3368  | E15.5 * Wnt1 up vs E15.5 * Ctrl |
| 10549679 | Brsk1         | NM_001003920 | 0.00660518   | 1.33671 | E15.5 * Wnt1 up vs E15.5 * Ctrl |
| 10365518 | Nt5dc3        | NM_175331    | 0.0079029    | 1.33665 | E15.5 * Wnt1 up vs E15.5 * Ctrl |
| 10424700 | Zfp41         | NM_011759    | 0.000191693  | 1.33653 | E15.5 * Wnt1 up vs E15.5 * Ctrl |
| 10526842 | Zfp157        | NM_028130    | 7.13334e-005 | 1.33643 | E15.5 * Wnt1 up vs E15.5 * Ctrl |
| 10420659 | 6330409N04Rik | NM_025697    | 3.39781e-005 | 1.33592 | E15.5 * Wnt1 up vs E15.5 * Ctrl |
| 10365230 | Tdg           | NM_172552    | 3.04171e-005 | 1.33578 | E15.5 * Wnt1 up vs E15.5 * Ctrl |
| 10573115 | Rnf150        | NM_177378    | 0.000824648  | 1.33574 | E15.5 * Wnt1 up vs E15.5 * Ctrl |
| 10356593 | Hes6          | NM_019479    | 0.00252885   | 1.33573 | E15.5 * Wnt1 up vs E15.5 * Ctrl |
| 10388954 | Omg           | NM_019409    | 0.005084     | 1.33564 | E15.5 * Wnt1 up vs E15.5 * Ctrl |
| 10354157 | Chst10        | NM_145142    | 0.000111059  | 1.33539 | E15.5 * Wnt1 up vs E15.5 * Ctrl |
| 10426835 | Dip2b         | NM_001159361 | 0.000109204  | 1.33539 | E15.5 * Wnt1 up vs E15.5 * Ctrl |

|                        |               |              |         |                                 |
|------------------------|---------------|--------------|---------|---------------------------------|
| 10585601 Snupn         | NM_178374     | 0.00143672   | 1.33531 | E15.5 * Wnt1 up vs E15.5 * Ctrl |
| 10448376 Flywch2       | NM_029798     | 0.000231612  | 1.33494 | E15.5 * Wnt1 up vs E15.5 * Ctrl |
| 10385234               | ---           | 0.00113026   | 1.33492 | E15.5 * Wnt1 up vs E15.5 * Ctrl |
| 10396161 Tmx1          | NM_028339     | 0.00117203   | 1.3349  | E15.5 * Wnt1 up vs E15.5 * Ctrl |
| 10595831 Zbtb38        | NM_175537     | 0.00229362   | 1.33487 | E15.5 * Wnt1 up vs E15.5 * Ctrl |
| 10523190 9130213B05Rik | BC006604      | 0.00258496   | 1.33461 | E15.5 * Wnt1 up vs E15.5 * Ctrl |
| 10366310 Osbpl8        | NM_175489     | 0.00249274   | 1.33453 | E15.5 * Wnt1 up vs E15.5 * Ctrl |
| 10536541 St7           | NM_022332     | 0.000844321  | 1.3344  | E15.5 * Wnt1 up vs E15.5 * Ctrl |
| 10419240 Ddhd1         | NM_001042719  | 0.00184612   | 1.33396 | E15.5 * Wnt1 up vs E15.5 * Ctrl |
| 10599461 Calm2         | NM_007589     | 3.63956e-006 | 1.3339  | E15.5 * Wnt1 up vs E15.5 * Ctrl |
| 10368534 Ncoa7         | NM_172495     | 0.00513207   | 1.33367 | E15.5 * Wnt1 up vs E15.5 * Ctrl |
| 10448034 Dll1          | NM_007865     | 0.00209367   | 1.33365 | E15.5 * Wnt1 up vs E15.5 * Ctrl |
| 10547140 Tmcc1         | ENSMUST000001 | 1.77688e-005 | 1.33334 | E15.5 * Wnt1 up vs E15.5 * Ctrl |
| 10504169 4933409K07Rik | BC072647      | 0.00072401   | 1.33223 | E15.5 * Wnt1 up vs E15.5 * Ctrl |
| 10377987 Rabep1        | NM_019400     | 6.32102e-007 | 1.33197 | E15.5 * Wnt1 up vs E15.5 * Ctrl |
| 10512098 Aptx          | NM_025545     | 0.000505011  | 1.33196 | E15.5 * Wnt1 up vs E15.5 * Ctrl |
| 10507394 Hectd3        | NM_175244     | 0.0035807    | 1.33192 | E15.5 * Wnt1 up vs E15.5 * Ctrl |
| 10385926 Cdc42se2      | NM_178626     | 0.00129508   | 1.33188 | E15.5 * Wnt1 up vs E15.5 * Ctrl |
| 10425822 Pnpla3        | NM_054088     | 0.00106527   | 1.33185 | E15.5 * Wnt1 up vs E15.5 * Ctrl |
| 10430968 A4galt        | NM_001004150  | 0.0065796    | 1.33184 | E15.5 * Wnt1 up vs E15.5 * Ctrl |
| 10593887 Neil1         | NM_028347     | 0.0138542    | 1.3315  | E15.5 * Wnt1 up vs E15.5 * Ctrl |
| 10468916 Fam171a1      | NM_001081161  | 0.000364077  | 1.33127 | E15.5 * Wnt1 up vs E15.5 * Ctrl |
| 10358672 Hmcn1         | NM_001024720  | 0.00362136   | 1.33092 | E15.5 * Wnt1 up vs E15.5 * Ctrl |
| 10600377 Atp6ap1       | NM_018794     | 0.0077488    | 1.33091 | E15.5 * Wnt1 up vs E15.5 * Ctrl |
| 10495340 Taf13         | NM_025444     | 0.000283429  | 1.33069 | E15.5 * Wnt1 up vs E15.5 * Ctrl |
| 10500685 Atp1a1        | NM_144900     | 0.000154792  | 1.33067 | E15.5 * Wnt1 up vs E15.5 * Ctrl |
| 10487000 Shf           | NM_001013829  | 0.00145359   | 1.33065 | E15.5 * Wnt1 up vs E15.5 * Ctrl |
| 10402808 Jag2          | NM_010588     | 0.00145207   | 1.33056 | E15.5 * Wnt1 up vs E15.5 * Ctrl |
| 10532267 Vmn2r9        | NM_001104621  | 0.00589055   | 1.33    | E15.5 * Wnt1 up vs E15.5 * Ctrl |
| 10508272 Csmd2         | ENSMUST000001 | 0.000161274  | 1.32986 | E15.5 * Wnt1 up vs E15.5 * Ctrl |
| 10501098 Kcnc4         | NM_145922     | 0.000169487  | 1.32979 | E15.5 * Wnt1 up vs E15.5 * Ctrl |
| 10474073 C230071H18Rik | BC147668      | 0.0017422    | 1.32964 | E15.5 * Wnt1 up vs E15.5 * Ctrl |
| 10411332 Hmgcr         | NM_008255     | 0.00469573   | 1.32947 | E15.5 * Wnt1 up vs E15.5 * Ctrl |
| 10543785 AB041803      | AB041803      | 0.00730748   | 1.32944 | E15.5 * Wnt1 up vs E15.5 * Ctrl |
| 10364194 Lss           | NM_146006     | 0.00124241   | 1.32899 | E15.5 * Wnt1 up vs E15.5 * Ctrl |
| 10483770 Lnp           | NM_001110209  | 0.00156536   | 1.32896 | E15.5 * Wnt1 up vs E15.5 * Ctrl |
| 10455769 Csnk1g3       | NM_152809     | 0.000155321  | 1.32881 | E15.5 * Wnt1 up vs E15.5 * Ctrl |
| 10439732 Plcx2         | NM_001134480  | 0.00411321   | 1.32877 | E15.5 * Wnt1 up vs E15.5 * Ctrl |
| 10601547               | ---           | 0.00186294   | 1.32855 | E15.5 * Wnt1 up vs E15.5 * Ctrl |
| 10571761               | ---           | 0.0011635    | 1.32853 | E15.5 * Wnt1 up vs E15.5 * Ctrl |
| 10507677 Hivep3        | NM_010657     | 0.000739579  | 1.32815 | E15.5 * Wnt1 up vs E15.5 * Ctrl |
| 10603362 Ccdc120       | NM_207202     | 0.00761641   | 1.328   | E15.5 * Wnt1 up vs E15.5 * Ctrl |
| 10587871 Paqr9         | NM_198414     | 0.00884424   | 1.32788 | E15.5 * Wnt1 up vs E15.5 * Ctrl |
| 10552118 OTTMUSG00000  | XM_001481141  | 0.0138303    | 1.32753 | E15.5 * Wnt1 up vs E15.5 * Ctrl |
| 10426292 Alg10b        | NM_001033441  | 0.000207109  | 1.32733 | E15.5 * Wnt1 up vs E15.5 * Ctrl |
| 10555009               | ---           | 0.000325149  | 1.32725 | E15.5 * Wnt1 up vs E15.5 * Ctrl |
| 10511069 Gnb1          | NM_008142     | 2.07651e-005 | 1.32717 | E15.5 * Wnt1 up vs E15.5 * Ctrl |
| 10444991 EG547347      | NM_001034909  | 0.0012667    | 1.32691 | E15.5 * Wnt1 up vs E15.5 * Ctrl |
| 10362904 Rtn4ip1       | NM_130892     | 0.00207967   | 1.32689 | E15.5 * Wnt1 up vs E15.5 * Ctrl |
| 10502451 Bmpr1b        | NM_007560     | 0.0145676    | 1.32677 | E15.5 * Wnt1 up vs E15.5 * Ctrl |
| 10594638 Aph1c         | NM_026674     | 0.0037119    | 1.32665 | E15.5 * Wnt1 up vs E15.5 * Ctrl |
| 10590888 EG665154      | XR_031035     | 0.000459375  | 1.32664 | E15.5 * Wnt1 up vs E15.5 * Ctrl |
| 10513397 1110054O05Rik | NM_001013577  | 1.94107e-005 | 1.32656 | E15.5 * Wnt1 up vs E15.5 * Ctrl |
| 10561958 Snx26         | NM_178252     | 0.000552002  | 1.32648 | E15.5 * Wnt1 up vs E15.5 * Ctrl |
| 10540991               | ---           | 0.0011109    | 1.32628 | E15.5 * Wnt1 up vs E15.5 * Ctrl |
| 10488655 Bcl2l1        | NM_009743     | 0.00223909   | 1.32626 | E15.5 * Wnt1 up vs E15.5 * Ctrl |
| 10431564 Cpt1b         | NM_009948     | 0.000214092  | 1.32614 | E15.5 * Wnt1 up vs E15.5 * Ctrl |
| 10547410 Erc1          | NM_053204     | 6.11575e-005 | 1.32582 | E15.5 * Wnt1 up vs E15.5 * Ctrl |
| 10348194 Efhd1         | NM_028889     | 0.0014008    | 1.32557 | E15.5 * Wnt1 up vs E15.5 * Ctrl |
| 10454015 Ttc39c        | NM_028341     | 0.000882168  | 1.3252  | E15.5 * Wnt1 up vs E15.5 * Ctrl |
| 10360914 Lypla1        | NM_146106     | 0.00249996   | 1.32508 | E15.5 * Wnt1 up vs E15.5 * Ctrl |
| 10451322 Cul9          | NM_001081335  | 0.000197274  | 1.32494 | E15.5 * Wnt1 up vs E15.5 * Ctrl |
| 10577534 Vdac3         | NM_011696     | 2.1007e-005  | 1.32468 | E15.5 * Wnt1 up vs E15.5 * Ctrl |
| 10524941 Fbxo21        | NM_145564     | 0.000801407  | 1.32467 | E15.5 * Wnt1 up vs E15.5 * Ctrl |
| 10548116 Ccnd2         | BC049086      | 0.000287521  | 1.32425 | E15.5 * Wnt1 up vs E15.5 * Ctrl |
| 10386789 Ulk2          | NM_013881     | 2.80164e-006 | 1.32408 | E15.5 * Wnt1 up vs E15.5 * Ctrl |

|          |               |              |              |         |                                 |
|----------|---------------|--------------|--------------|---------|---------------------------------|
| 10439955 | Fam55c        | NM_001134457 | 0.00879789   | 1.32402 | E15.5 * Wnt1 up vs E15.5 * Ctrl |
| 10353775 | Bend6         | NM_177235    | 0.00481644   | 1.32396 | E15.5 * Wnt1 up vs E15.5 * Ctrl |
| 10591668 | Rgl3          | NM_023622    | 0.000285555  | 1.32389 | E15.5 * Wnt1 up vs E15.5 * Ctrl |
| 10500133 | Prune         | NM_173347    | 0.0031959    | 1.32388 | E15.5 * Wnt1 up vs E15.5 * Ctrl |
| 10440738 | Tiam1         | NM_009384    | 0.00106656   | 1.32366 | E15.5 * Wnt1 up vs E15.5 * Ctrl |
| 10518464 | 2610109H07Rik | NM_027426    | 0.00293091   | 1.32343 | E15.5 * Wnt1 up vs E15.5 * Ctrl |
| 10415574 | Ccni          | NM_017367    | 2.01079e-005 | 1.32338 | E15.5 * Wnt1 up vs E15.5 * Ctrl |
| 10514072 | Zdhhc21       | NM_026647    | 0.002665     | 1.32314 | E15.5 * Wnt1 up vs E15.5 * Ctrl |
| 10502510 | Lmo4          | NM_010723    | 0.00305736   | 1.32279 | E15.5 * Wnt1 up vs E15.5 * Ctrl |
| 10479514 | Col20a1       | BC016112     | 0.00432028   | 1.32261 | E15.5 * Wnt1 up vs E15.5 * Ctrl |
| 10358091 | Nav1          | NM_173437    | 0.0019299    | 1.32257 | E15.5 * Wnt1 up vs E15.5 * Ctrl |
| 10491300 | Skil          | NM_011386    | 0.000476546  | 1.32207 | E15.5 * Wnt1 up vs E15.5 * Ctrl |
| 10597103 | Dhx30         | NM_133347    | 1.42676e-005 | 1.32199 | E15.5 * Wnt1 up vs E15.5 * Ctrl |
| 10522606 | Exoc1         | NM_027270    | 0.000157908  | 1.32191 | E15.5 * Wnt1 up vs E15.5 * Ctrl |
| 10487033 | Myef2         | NM_010852    | 0.000324754  | 1.32191 | E15.5 * Wnt1 up vs E15.5 * Ctrl |
| 10490946 | Hsp90aa1      | NM_010480    | 1.20104e-005 | 1.32132 | E15.5 * Wnt1 up vs E15.5 * Ctrl |
| 10580391 | Itfg1         | NM_028007    | 3.61471e-006 | 1.32105 | E15.5 * Wnt1 up vs E15.5 * Ctrl |
| 10564109 | ---           | ---          | 0.000969732  | 1.3207  | E15.5 * Wnt1 up vs E15.5 * Ctrl |
| 10564117 | ---           | ---          | 0.000969732  | 1.3207  | E15.5 * Wnt1 up vs E15.5 * Ctrl |
| 10366597 | Grip1         | NM_028736    | 0.000409332  | 1.32064 | E15.5 * Wnt1 up vs E15.5 * Ctrl |
| 10558707 | Ric8          | NM_053194    | 0.00193136   | 1.32056 | E15.5 * Wnt1 up vs E15.5 * Ctrl |
| 10401702 | Zdhhc22       | NM_001080943 | 0.0018364    | 1.32048 | E15.5 * Wnt1 up vs E15.5 * Ctrl |
| 10477897 | Dlgap4        | NM_146128    | 3.41318e-008 | 1.32041 | E15.5 * Wnt1 up vs E15.5 * Ctrl |
| 10536369 | C1galt1       | NM_052993    | 0.00664631   | 1.32022 | E15.5 * Wnt1 up vs E15.5 * Ctrl |
| 10467921 | Chuk          | NM_007700    | 0.00225793   | 1.32014 | E15.5 * Wnt1 up vs E15.5 * Ctrl |
| 10507990 | Epha10        | ENSMUST00000 | 0.000861585  | 1.32008 | E15.5 * Wnt1 up vs E15.5 * Ctrl |
| 10520048 | Mil5          | ENSMUST00000 | 2.57765e-005 | 1.31998 | E15.5 * Wnt1 up vs E15.5 * Ctrl |
| 10523865 | 1700028K03Rik | NM_182745    | 0.00278978   | 1.31997 | E15.5 * Wnt1 up vs E15.5 * Ctrl |
| 10582719 | Sipa1l2       | NM_001081337 | 0.00299446   | 1.31988 | E15.5 * Wnt1 up vs E15.5 * Ctrl |
| 10488926 | Mmp24         | NM_010808    | 0.00033365   | 1.31982 | E15.5 * Wnt1 up vs E15.5 * Ctrl |
| 10394929 | EG668662      | AK132630     | 0.0121543    | 1.31883 | E15.5 * Wnt1 up vs E15.5 * Ctrl |
| 10407921 | Vdac3         | NM_011696    | 1.20203e-005 | 1.31881 | E15.5 * Wnt1 up vs E15.5 * Ctrl |
| 10407926 | Vdac3         | NM_011696    | 1.20203e-005 | 1.31881 | E15.5 * Wnt1 up vs E15.5 * Ctrl |
| 10423363 | Ank           | NM_020332    | 0.00352126   | 1.31853 | E15.5 * Wnt1 up vs E15.5 * Ctrl |
| 10403420 | Idi2          | NM_177197    | 0.00414919   | 1.3185  | E15.5 * Wnt1 up vs E15.5 * Ctrl |
| 10347650 | Accn4         | NM_183022    | 0.00119777   | 1.31832 | E15.5 * Wnt1 up vs E15.5 * Ctrl |
| 10351117 | ENSMUSG00000  | ENSMUST00000 | 0.000396138  | 1.31801 | E15.5 * Wnt1 up vs E15.5 * Ctrl |
| 10369541 | Hk1           | NM_010438    | 0.000102991  | 1.31752 | E15.5 * Wnt1 up vs E15.5 * Ctrl |
| 10462822 | Exoc6         | NM_175353    | 0.00432881   | 1.31744 | E15.5 * Wnt1 up vs E15.5 * Ctrl |
| 10438189 | Slc7a4        | NM_144852    | 0.00243604   | 1.31738 | E15.5 * Wnt1 up vs E15.5 * Ctrl |
| 10361846 | Reps1         | NM_009048    | 0.000374214  | 1.31738 | E15.5 * Wnt1 up vs E15.5 * Ctrl |
| 10607539 | Mbtps2        | NM_172307    | 0.000373656  | 1.31732 | E15.5 * Wnt1 up vs E15.5 * Ctrl |
| 10421685 | Serp2         | BC100483     | 2.12384e-005 | 1.31669 | E15.5 * Wnt1 up vs E15.5 * Ctrl |
| 10374485 | Peli1         | NM_023324    | 0.00141125   | 1.31666 | E15.5 * Wnt1 up vs E15.5 * Ctrl |
| 10421214 | Rhobtb2       | NM_153514    | 0.0022502    | 1.31653 | E15.5 * Wnt1 up vs E15.5 * Ctrl |
| 10504172 | 4933409K07Rik | BC059060     | 0.000720117  | 1.31631 | E15.5 * Wnt1 up vs E15.5 * Ctrl |
| 10417212 | Itgbl1        | NM_145467    | 8.49883e-005 | 1.31594 | E15.5 * Wnt1 up vs E15.5 * Ctrl |
| 10551487 | LOC434156     | ENSMUST00000 | 0.000815217  | 1.31585 | E15.5 * Wnt1 up vs E15.5 * Ctrl |
| 10400413 | Garnl1        | NM_001112714 | 0.00631033   | 1.31583 | E15.5 * Wnt1 up vs E15.5 * Ctrl |
| 10516982 | Stx12         | NM_133887    | 4.23636e-005 | 1.31582 | E15.5 * Wnt1 up vs E15.5 * Ctrl |
| 10396177 | Actr10        | NM_019785    | 0.00584873   | 1.31548 | E15.5 * Wnt1 up vs E15.5 * Ctrl |
| 10398286 | ---           | ---          | 0.00130045   | 1.31526 | E15.5 * Wnt1 up vs E15.5 * Ctrl |
| 10359024 | EG433367      | ENSMUST00000 | 0.00135657   | 1.31505 | E15.5 * Wnt1 up vs E15.5 * Ctrl |
| 10385699 | Rmnd5b        | NM_025346    | 0.00915615   | 1.31503 | E15.5 * Wnt1 up vs E15.5 * Ctrl |
| 10472155 | Kcnj3         | NM_008426    | 6.43534e-005 | 1.31492 | E15.5 * Wnt1 up vs E15.5 * Ctrl |
| 10500469 | Pde4dip       | NM_001039376 | 5.61082e-005 | 1.31486 | E15.5 * Wnt1 up vs E15.5 * Ctrl |
| 10519392 | Krit1         | NM_030675    | 4.2383e-005  | 1.3148  | E15.5 * Wnt1 up vs E15.5 * Ctrl |
| 10419416 | 3632451O06Rik | NM_026142    | 0.0144584    | 1.31479 | E15.5 * Wnt1 up vs E15.5 * Ctrl |
| 10536895 | Atp6v1f       | NM_025381    | 0.0018566    | 1.31422 | E15.5 * Wnt1 up vs E15.5 * Ctrl |
| 10417002 | A830021K08Rik | AK043702     | 0.00712856   | 1.31415 | E15.5 * Wnt1 up vs E15.5 * Ctrl |
| 10585201 | Timm8b        | NM_013897    | 4.77414e-005 | 1.314   | E15.5 * Wnt1 up vs E15.5 * Ctrl |
| 10497197 | 5330432E05Rik | AK030563     | 0.00541969   | 1.31396 | E15.5 * Wnt1 up vs E15.5 * Ctrl |
| 10427895 | Baspl         | NM_027395    | 1.58091e-007 | 1.31384 | E15.5 * Wnt1 up vs E15.5 * Ctrl |
| 10593471 | ---           | ---          | 0.00124357   | 1.31365 | E15.5 * Wnt1 up vs E15.5 * Ctrl |
| 10578391 | Smarce1       | NM_020618    | 4.65786e-006 | 1.31328 | E15.5 * Wnt1 up vs E15.5 * Ctrl |
| 10387816 | Rnasek        | NM_173742    | 0.00287644   | 1.31323 | E15.5 * Wnt1 up vs E15.5 * Ctrl |

|          |               |               |              |         |                                 |
|----------|---------------|---------------|--------------|---------|---------------------------------|
| 10407192 | Slc38a9       | NM_178746     | 0.00640311   | 1.3129  | E15.5 * Wnt1 up vs E15.5 * Ctrl |
| 10448168 | Fpr-rs3       | ENSMUST000001 | 0.00156307   | 1.31269 | E15.5 * Wnt1 up vs E15.5 * Ctrl |
| 10539111 | Tmem150       | NM_144916     | 0.0138073    | 1.31256 | E15.5 * Wnt1 up vs E15.5 * Ctrl |
| 10361065 | Mfsd7b        | NM_001081259  | 0.00102457   | 1.31234 | E15.5 * Wnt1 up vs E15.5 * Ctrl |
| 10498998 | D930015E06Rik | NM_172681     | 0.000189022  | 1.31233 | E15.5 * Wnt1 up vs E15.5 * Ctrl |
| 10603387 | Hdac6         | NM_010413     | 0.000143938  | 1.31232 | E15.5 * Wnt1 up vs E15.5 * Ctrl |
| 10372891 | Srgap1        | NM_001081037  | 0.000634687  | 1.31219 | E15.5 * Wnt1 up vs E15.5 * Ctrl |
| 10357698 | Tmcc2         | NM_178874     | 0.00147624   | 1.31213 | E15.5 * Wnt1 up vs E15.5 * Ctrl |
| 10387723 | 2810408A11Rik | BC069874      | 0.0105313    | 1.31193 | E15.5 * Wnt1 up vs E15.5 * Ctrl |
| 10578515 | Ankrd37       | NM_001039562  | 0.00058347   | 1.31188 | E15.5 * Wnt1 up vs E15.5 * Ctrl |
| 10407814 | Tbce          | NM_178337     | 0.00790348   | 1.31188 | E15.5 * Wnt1 up vs E15.5 * Ctrl |
| 10499493 | Hcn3          | NM_008227     | 0.0025955    | 1.31178 | E15.5 * Wnt1 up vs E15.5 * Ctrl |
| 10599200 | Pgrmc1        | NM_016783     | 0.000702232  | 1.31174 | E15.5 * Wnt1 up vs E15.5 * Ctrl |
| 10395064 | Tssc1         | NM_201357     | 0.0012195    | 1.31163 | E15.5 * Wnt1 up vs E15.5 * Ctrl |
| 10474112 | Traf6         | NM_009424     | 0.000880408  | 1.31149 | E15.5 * Wnt1 up vs E15.5 * Ctrl |
| 10399430 | Ddx1          | NM_134040     | 3.28598e-006 | 1.31134 | E15.5 * Wnt1 up vs E15.5 * Ctrl |
| 10400350 | Cfl2          | NM_007688     | 0.000601135  | 1.31134 | E15.5 * Wnt1 up vs E15.5 * Ctrl |
| 10508253 | Dlgap3        | NM_198618     | 0.000175744  | 1.31128 | E15.5 * Wnt1 up vs E15.5 * Ctrl |
| 10468929 | Nmt2          | NM_008708     | 0.000450965  | 1.31096 | E15.5 * Wnt1 up vs E15.5 * Ctrl |
| 10384885 | Spnb2         | NM_175836     | 1.62785e-005 | 1.31094 | E15.5 * Wnt1 up vs E15.5 * Ctrl |
| 10503882 | Rngtt         | NM_011884     | 0.000587078  | 1.31065 | E15.5 * Wnt1 up vs E15.5 * Ctrl |
| 10579609 | Fcho1         | NM_028715     | 0.000800605  | 1.31053 | E15.5 * Wnt1 up vs E15.5 * Ctrl |
| 10452571 | Ptpm          | NM_008984     | 0.00950698   | 1.3104  | E15.5 * Wnt1 up vs E15.5 * Ctrl |
| 10554160 | ENSMUSG000001 | ENSMUST000001 | 3.91277e-005 | 1.31038 | E15.5 * Wnt1 up vs E15.5 * Ctrl |
| 10562578 | Pop4          | NM_025390     | 0.00235339   | 1.31031 | E15.5 * Wnt1 up vs E15.5 * Ctrl |
| 10562687 | Igln5         | ENSMUST000001 | 0.0124191    | 1.3103  | E15.5 * Wnt1 up vs E15.5 * Ctrl |
| 10391963 | Nsf           | NM_008740     | 0.00315204   | 1.3103  | E15.5 * Wnt1 up vs E15.5 * Ctrl |
| 10508819 | Cd164l2       | NM_027152     | 0.00180939   | 1.31016 | E15.5 * Wnt1 up vs E15.5 * Ctrl |
| 10478897 | Ptpn1         | NM_011201     | 0.000160532  | 1.31002 | E15.5 * Wnt1 up vs E15.5 * Ctrl |
| 10478014 | Vstm2l        | NM_198627     | 0.00145429   | 1.30945 | E15.5 * Wnt1 up vs E15.5 * Ctrl |
| 10396800 | Plekhh1       | ENSMUST000001 | 2.2748e-005  | 1.3091  | E15.5 * Wnt1 up vs E15.5 * Ctrl |
| 10596433 | Glyctk        | NM_174846     | 6.93727e-005 | 1.3091  | E15.5 * Wnt1 up vs E15.5 * Ctrl |
| 10502329 | Cisd2         | NM_025902     | 0.002434     | 1.30909 | E15.5 * Wnt1 up vs E15.5 * Ctrl |
| 10569972 | Lass4         | NM_026058     | 0.0122839    | 1.30885 | E15.5 * Wnt1 up vs E15.5 * Ctrl |
| 10419370 | Exoc5         | NM_207214     | 0.0112653    | 1.30869 | E15.5 * Wnt1 up vs E15.5 * Ctrl |
| 10590383 | Deb1          | NM_026794     | 0.000265783  | 1.30848 | E15.5 * Wnt1 up vs E15.5 * Ctrl |
| 10521927 | Tbc1d19       | NM_144517     | 0.000483527  | 1.30835 | E15.5 * Wnt1 up vs E15.5 * Ctrl |
| 10559498 | ---           | ---           | 0.0117529    | 1.30825 | E15.5 * Wnt1 up vs E15.5 * Ctrl |
| 10493548 | Pmvk          | NM_026784     | 0.00221299   | 1.30822 | E15.5 * Wnt1 up vs E15.5 * Ctrl |
| 10491958 | ENSMUSG000001 | ENSMUST000001 | 0.00437471   | 1.30817 | E15.5 * Wnt1 up vs E15.5 * Ctrl |
| 10445992 | Shd           | NM_001159523  | 0.00368161   | 1.30797 | E15.5 * Wnt1 up vs E15.5 * Ctrl |
| 10593318 | ---           | ---           | 0.00491901   | 1.30787 | E15.5 * Wnt1 up vs E15.5 * Ctrl |
| 10373400 | Myl6b         | NM_172259     | 0.0072629    | 1.30782 | E15.5 * Wnt1 up vs E15.5 * Ctrl |
| 10578582 | D030016E14Rik | NM_177240     | 9.47966e-005 | 1.30754 | E15.5 * Wnt1 up vs E15.5 * Ctrl |
| 10486107 | Srp14         | NM_009273     | 0.000558006  | 1.30752 | E15.5 * Wnt1 up vs E15.5 * Ctrl |
| 10411019 | Msh3          | NM_010829     | 0.00292139   | 1.3075  | E15.5 * Wnt1 up vs E15.5 * Ctrl |
| 10358611 | Hmcn1         | NM_001024720  | 0.00805362   | 1.30743 | E15.5 * Wnt1 up vs E15.5 * Ctrl |
| 10521481 | Jakmip1       | NM_178394     | 0.00217993   | 1.30697 | E15.5 * Wnt1 up vs E15.5 * Ctrl |
| 10591270 | Olfr12        | NM_173777     | 7.34282e-005 | 1.30692 | E15.5 * Wnt1 up vs E15.5 * Ctrl |
| 10474545 | Slc12a6       | NM_133649     | 0.000199842  | 1.30654 | E15.5 * Wnt1 up vs E15.5 * Ctrl |
| 10441657 | Prr18         | NM_178774     | 0.000208986  | 1.30649 | E15.5 * Wnt1 up vs E15.5 * Ctrl |
| 10425354 | Mgat3         | NM_010795     | 5.08162e-005 | 1.30616 | E15.5 * Wnt1 up vs E15.5 * Ctrl |
| 10498284 | Wwtr1         | NM_133784     | 0.000291852  | 1.30605 | E15.5 * Wnt1 up vs E15.5 * Ctrl |
| 10498415 | Dhx36         | NM_028136     | 0.00012492   | 1.30576 | E15.5 * Wnt1 up vs E15.5 * Ctrl |
| 10460782 | Gpha2         | NM_130453     | 0.0068903    | 1.30564 | E15.5 * Wnt1 up vs E15.5 * Ctrl |
| 10599232 | Nkap          | NM_025937     | 0.014363     | 1.30555 | E15.5 * Wnt1 up vs E15.5 * Ctrl |
| 10382010 | Wdr68         | NM_027946     | 3.69315e-005 | 1.30549 | E15.5 * Wnt1 up vs E15.5 * Ctrl |
| 10583697 | Smarca4       | NM_011417     | 8.52927e-005 | 1.30543 | E15.5 * Wnt1 up vs E15.5 * Ctrl |
| 10384811 | Ccdc104       | NM_025740     | 0.00150782   | 1.30526 | E15.5 * Wnt1 up vs E15.5 * Ctrl |
| 10577838 | Ddhd2         | BC046229      | 0.000471497  | 1.30482 | E15.5 * Wnt1 up vs E15.5 * Ctrl |
| 10471978 | Epc2          | NM_172663     | 0.00174514   | 1.3048  | E15.5 * Wnt1 up vs E15.5 * Ctrl |
| 10552433 | BC043301      | NM_001008549  | 0.00158048   | 1.30474 | E15.5 * Wnt1 up vs E15.5 * Ctrl |
| 10515808 | LOC674677     | ENSMUST000001 | 0.000345254  | 1.30467 | E15.5 * Wnt1 up vs E15.5 * Ctrl |
| 10487879 | Rnf24         | NM_178607     | 0.00214768   | 1.30435 | E15.5 * Wnt1 up vs E15.5 * Ctrl |
| 10358637 | Hmcn1         | NM_001024720  | 0.0130284    | 1.3043  | E15.5 * Wnt1 up vs E15.5 * Ctrl |
| 10506603 | Ssbp3         | NM_023672     | 0.00437226   | 1.30428 | E15.5 * Wnt1 up vs E15.5 * Ctrl |

|                        |               |              |         |                                 |
|------------------------|---------------|--------------|---------|---------------------------------|
| 10383061 Ccdc40        | NM_175430     | 0.000979858  | 1.30399 | E15.5 * Wnt1 up vs E15.5 * Ctrl |
| 10488322 A230067G21Rik | NM_001033348  | 0.00482868   | 1.3037  | E15.5 * Wnt1 up vs E15.5 * Ctrl |
| 10559788 Olfr1349      | NM_207136     | 0.00806853   | 1.30369 | E15.5 * Wnt1 up vs E15.5 * Ctrl |
| 10468089 Mgea5         | NM_023799     | 1.45497e-006 | 1.30362 | E15.5 * Wnt1 up vs E15.5 * Ctrl |
| 10428983 Fam49b        | NM_144846     | 0.000238636  | 1.30362 | E15.5 * Wnt1 up vs E15.5 * Ctrl |
| 10586331 Igdcc3        | NM_008988     | 0.00263926   | 1.3032  | E15.5 * Wnt1 up vs E15.5 * Ctrl |
| 10391746 Gpatch8       | NM_001159492  | 0.0131735    | 1.30316 | E15.5 * Wnt1 up vs E15.5 * Ctrl |
| 10416899 Ndfip2        | NM_029561     | 0.000859169  | 1.30299 | E15.5 * Wnt1 up vs E15.5 * Ctrl |
| 10434869 Ccdc50        | NM_026202     | 1.52406e-005 | 1.30297 | E15.5 * Wnt1 up vs E15.5 * Ctrl |
| 10515051 Osbp19        | NM_133885     | 1.59657e-005 | 1.30289 | E15.5 * Wnt1 up vs E15.5 * Ctrl |
| 10519007 Tprgl         | NM_026388     | 0.000901522  | 1.30288 | E15.5 * Wnt1 up vs E15.5 * Ctrl |
| 10477353 Mapre1        | NM_007896     | 8.0495e-006  | 1.30285 | E15.5 * Wnt1 up vs E15.5 * Ctrl |
| 10575376 Ftsjd1        | NM_146215     | 0.000614823  | 1.30259 | E15.5 * Wnt1 up vs E15.5 * Ctrl |
| 10511803 2610029101Rik | ENSMUST000001 | 0.00672391   | 1.30239 | E15.5 * Wnt1 up vs E15.5 * Ctrl |
| 10460221 Chka          | NM_013490     | 1.64538e-005 | 1.30214 | E15.5 * Wnt1 up vs E15.5 * Ctrl |
| 10581299 Agrp          | NM_007427     | 0.000378243  | 1.30206 | E15.5 * Wnt1 up vs E15.5 * Ctrl |
| 10434754 BC106179      | BC106179      | 0.00604778   | 1.30203 | E15.5 * Wnt1 up vs E15.5 * Ctrl |
| 10598678 Usp9x         | NM_009481     | 8.20562e-006 | 1.30201 | E15.5 * Wnt1 up vs E15.5 * Ctrl |
| 10512682 Zbtb5         | NM_173399     | 0.0132465    | 1.30198 | E15.5 * Wnt1 up vs E15.5 * Ctrl |
| 10436983 Dopey2        | NM_027293     | 0.00196689   | 1.30192 | E15.5 * Wnt1 up vs E15.5 * Ctrl |
| 10398117 Bdkrb2        | NM_009747     | 0.00900337   | 1.3017  | E15.5 * Wnt1 up vs E15.5 * Ctrl |
| 10463200 Npl2          | NM_026152     | 0.00915734   | 1.3017  | E15.5 * Wnt1 up vs E15.5 * Ctrl |
| 10347427 Stk36         | NM_175031     | 0.00287586   | 1.30134 | E15.5 * Wnt1 up vs E15.5 * Ctrl |
| 10375572 Olfr1382      | NM_001011790  | 0.00489631   | 1.30132 | E15.5 * Wnt1 up vs E15.5 * Ctrl |
| 10597627 Oxsrl         | NM_133985     | 0.000305307  | 1.30116 | E15.5 * Wnt1 up vs E15.5 * Ctrl |
| 10540509 Grm7          | NM_177328     | 0.00409219   | 1.30101 | E15.5 * Wnt1 up vs E15.5 * Ctrl |
| 10413951 Arhgap22      | NM_153800     | 2.62125e-006 | 1.30097 | E15.5 * Wnt1 up vs E15.5 * Ctrl |
| 10569071 Hras1         | NM_001130444  | 3.71825e-005 | 1.30091 | E15.5 * Wnt1 up vs E15.5 * Ctrl |
| 10597833 Sec22c        | NM_178677     | 0.0108823    | 1.30069 | E15.5 * Wnt1 up vs E15.5 * Ctrl |
| 10433536 Clec16a       | NM_177562     | 0.00013578   | 1.30064 | E15.5 * Wnt1 up vs E15.5 * Ctrl |
| 10592926 Tmem25        | NM_027865     | 0.000238893  | 1.30062 | E15.5 * Wnt1 up vs E15.5 * Ctrl |
| 10563558 Sergef        | NM_013789     | 2.94966e-006 | 1.30056 | E15.5 * Wnt1 up vs E15.5 * Ctrl |
| 10588192 Msl2          | AK173208      | 0.00144049   | 1.30017 | E15.5 * Wnt1 up vs E15.5 * Ctrl |
| 10482880 Baz2b         | NM_001001182  | 1.22614e-005 | 1.29991 | E15.5 * Wnt1 up vs E15.5 * Ctrl |
| 10606609 Tspan6        | NM_019656     | 0.000315569  | 1.29983 | E15.5 * Wnt1 up vs E15.5 * Ctrl |
| 10531899 Khlh8         | NM_178741     | 0.00172815   | 1.2997  | E15.5 * Wnt1 up vs E15.5 * Ctrl |
| 10404380 Dusp22        | NM_001037955  | 0.000411592  | 1.29939 | E15.5 * Wnt1 up vs E15.5 * Ctrl |
| 10568311 Zfp668        | NM_146259     | 0.00149171   | 1.29906 | E15.5 * Wnt1 up vs E15.5 * Ctrl |
| 10438907 Gp5           | NM_008148     | 0.00593028   | 1.29884 | E15.5 * Wnt1 up vs E15.5 * Ctrl |
| 10560842 Zfp94         | NM_009568     | 0.000117522  | 1.2988  | E15.5 * Wnt1 up vs E15.5 * Ctrl |
| 10527528 Smarce1       | NM_020618     | 4.33299e-006 | 1.29876 | E15.5 * Wnt1 up vs E15.5 * Ctrl |
| 10549097 Ldhd          | NM_008492     | 1.42936e-005 | 1.29843 | E15.5 * Wnt1 up vs E15.5 * Ctrl |
| 10415332 Rec8          | NM_020002     | 0.000702618  | 1.29835 | E15.5 * Wnt1 up vs E15.5 * Ctrl |
| 10523750 D930016D06Rik | BC082597      | 0.00528971   | 1.29827 | E15.5 * Wnt1 up vs E15.5 * Ctrl |
| 10404975 Id4           | NM_031166     | 0.00458147   | 1.29826 | E15.5 * Wnt1 up vs E15.5 * Ctrl |
| 10577222 2410022L05Rik | NM_025556     | 0.000379928  | 1.29823 | E15.5 * Wnt1 up vs E15.5 * Ctrl |
| 10484318 Nckap1        | NM_016965     | 5.0294e-005  | 1.29817 | E15.5 * Wnt1 up vs E15.5 * Ctrl |
| 10347862 Mff           | NM_029409     | 0.000190569  | 1.29802 | E15.5 * Wnt1 up vs E15.5 * Ctrl |
| 10441815 Sod2          | NM_013671     | 0.000944416  | 1.29783 | E15.5 * Wnt1 up vs E15.5 * Ctrl |
| 10562360 Gpi1          | NM_008155     | 0.00239514   | 1.29782 | E15.5 * Wnt1 up vs E15.5 * Ctrl |
| 10535720 1700001J03Rik | BC048528      | 0.00383168   | 1.29781 | E15.5 * Wnt1 up vs E15.5 * Ctrl |
| 10375713 Mgat4b        | NM_145926     | 0.00263075   | 1.29773 | E15.5 * Wnt1 up vs E15.5 * Ctrl |
| 10398936 Pacs2         | NM_001081170  | 0.00725629   | 1.2976  | E15.5 * Wnt1 up vs E15.5 * Ctrl |
| 10578045 Nrg1          | NM_178591     | 0.000216865  | 1.29745 | E15.5 * Wnt1 up vs E15.5 * Ctrl |
| 10441952 2210404J11Rik | NM_001039552  | 0.00954464   | 1.29734 | E15.5 * Wnt1 up vs E15.5 * Ctrl |
| 10562989 Cpt1c         | NM_153679     | 0.00163394   | 1.2973  | E15.5 * Wnt1 up vs E15.5 * Ctrl |
| 10574033 Nup93         | NM_172410     | 1.81965e-007 | 1.29726 | E15.5 * Wnt1 up vs E15.5 * Ctrl |
| 10580872 Zfp319        | NM_024467     | 0.000766958  | 1.29718 | E15.5 * Wnt1 up vs E15.5 * Ctrl |
| 10578619 Cdkn2aip      | NM_172407     | 0.000480273  | 1.2971  | E15.5 * Wnt1 up vs E15.5 * Ctrl |
| 10480324 2810030E01Rik | NM_028317     | 0.0141311    | 1.29699 | E15.5 * Wnt1 up vs E15.5 * Ctrl |
| 10607363               | ---           | 0.00710775   | 1.29676 | E15.5 * Wnt1 up vs E15.5 * Ctrl |
| 10520782 Zfp512        | NM_172993     | 0.00764237   | 1.29659 | E15.5 * Wnt1 up vs E15.5 * Ctrl |
| 10349828 Lrrn2         | NM_010732     | 0.0062533    | 1.29641 | E15.5 * Wnt1 up vs E15.5 * Ctrl |
| 10505187 Ugcg          | NM_011673     | 0.0139402    | 1.29622 | E15.5 * Wnt1 up vs E15.5 * Ctrl |
| 10582978 8430410K20Rik | BC014729      | 0.000857902  | 1.29617 | E15.5 * Wnt1 up vs E15.5 * Ctrl |
| 10383532 Narf          | NM_026272     | 0.0024534    | 1.29613 | E15.5 * Wnt1 up vs E15.5 * Ctrl |

|                        |               |              |         |                                 |
|------------------------|---------------|--------------|---------|---------------------------------|
| 10563949               | ---           | 0.0102055    | 1.29541 | E15.5 * Wnt1 up vs E15.5 * Ctrl |
| 10517566               | ---           | 0.00158292   | 1.29525 | E15.5 * Wnt1 up vs E15.5 * Ctrl |
| 10604932 Cd99l2        | NM_138309     | 0.0145856    | 1.29511 | E15.5 * Wnt1 up vs E15.5 * Ctrl |
| 10553644               | ---           | 0.0142503    | 1.29494 | E15.5 * Wnt1 up vs E15.5 * Ctrl |
| 10494527 Rnf115        | NM_026406     | 0.00245806   | 1.29487 | E15.5 * Wnt1 up vs E15.5 * Ctrl |
| 10567464 Dnahc3        | XM_355934     | 0.00189048   | 1.29474 | E15.5 * Wnt1 up vs E15.5 * Ctrl |
| 10573234 Lphn1         | NM_181039     | 0.00607136   | 1.29462 | E15.5 * Wnt1 up vs E15.5 * Ctrl |
| 10552303 EG434172      | NM_001033782  | 0.00990427   | 1.2945  | E15.5 * Wnt1 up vs E15.5 * Ctrl |
| 10433008 Map3k12       | NM_009582     | 0.00020496   | 1.29449 | E15.5 * Wnt1 up vs E15.5 * Ctrl |
| 10372965 Usp15         | NM_027604     | 8.74276e-006 | 1.29416 | E15.5 * Wnt1 up vs E15.5 * Ctrl |
| 10411287 Btf3l4        | NM_027453     | 1.45944e-005 | 1.29405 | E15.5 * Wnt1 up vs E15.5 * Ctrl |
| 10367830 Grm1          | NM_001114333  | 0.000465269  | 1.294   | E15.5 * Wnt1 up vs E15.5 * Ctrl |
| 10487613 Pdyn          | NM_018863     | 0.00140519   | 1.29397 | E15.5 * Wnt1 up vs E15.5 * Ctrl |
| 10567394 Pdilt         | ENSMUST000000 | 0.000575637  | 1.29389 | E15.5 * Wnt1 up vs E15.5 * Ctrl |
| 10498323 4932431H17Rik | NM_001081262  | 0.00880742   | 1.29386 | E15.5 * Wnt1 up vs E15.5 * Ctrl |
| 10344990 Crispld1      | NM_031402     | 0.000333022  | 1.29384 | E15.5 * Wnt1 up vs E15.5 * Ctrl |
| 10461930 D030056L22Rik | NM_177640     | 0.000855641  | 1.2938  | E15.5 * Wnt1 up vs E15.5 * Ctrl |
| 10580532 EG626231      | ENSMUST000000 | 0.0114325    | 1.29373 | E15.5 * Wnt1 up vs E15.5 * Ctrl |
| 10557585 Zfp553        | NM_146201     | 0.00146306   | 1.29365 | E15.5 * Wnt1 up vs E15.5 * Ctrl |
| 10363901 Etv5          | NM_023794     | 0.00215126   | 1.29341 | E15.5 * Wnt1 up vs E15.5 * Ctrl |
| 10380415 Cdc34         | BC094502      | 0.0124835    | 1.29328 | E15.5 * Wnt1 up vs E15.5 * Ctrl |
| 10600082 Nsdhl         | NM_010941     | 0.00876974   | 1.29327 | E15.5 * Wnt1 up vs E15.5 * Ctrl |
| 10471784 Rabgap1       | NM_146121     | 1.22356e-005 | 1.29318 | E15.5 * Wnt1 up vs E15.5 * Ctrl |
| 10514177 Bnc2          | NM_172870     | 0.0112726    | 1.29291 | E15.5 * Wnt1 up vs E15.5 * Ctrl |
| 10435791               | ---           | 2.73947e-005 | 1.29258 | E15.5 * Wnt1 up vs E15.5 * Ctrl |
| 10422055 ENSMUSG000000 | ENSMUST000000 | 0.00181704   | 1.29255 | E15.5 * Wnt1 up vs E15.5 * Ctrl |
| 10477167 Mcts2         | NM_025543     | 0.00100248   | 1.29242 | E15.5 * Wnt1 up vs E15.5 * Ctrl |
| 10601062 Dlg3          | NM_016747     | 0.000204087  | 1.2923  | E15.5 * Wnt1 up vs E15.5 * Ctrl |
| 10477630 Dynlrb1       | NM_025947     | 2.16114e-010 | 1.29199 | E15.5 * Wnt1 up vs E15.5 * Ctrl |
| 10568780 Mapk1ip1      | NM_001045483  | 0.0048937    | 1.2919  | E15.5 * Wnt1 up vs E15.5 * Ctrl |
| 10539857 EG434064      | NR_026990     | 0.000141882  | 1.29185 | E15.5 * Wnt1 up vs E15.5 * Ctrl |
| 10439798 Dzip3         | NM_001110017  | 0.00260218   | 1.29163 | E15.5 * Wnt1 up vs E15.5 * Ctrl |
| 10365870 Nr2c1         | NM_011629     | 0.00597264   | 1.29141 | E15.5 * Wnt1 up vs E15.5 * Ctrl |
| 10347669 Inha          | NM_010564     | 0.0142251    | 1.29128 | E15.5 * Wnt1 up vs E15.5 * Ctrl |
| 10571741               | ---           | 0.00103253   | 1.29125 | E15.5 * Wnt1 up vs E15.5 * Ctrl |
| 10547807 Eno2          | NM_013509     | 0.00705291   | 1.29113 | E15.5 * Wnt1 up vs E15.5 * Ctrl |
| 10462096               | ---           | 0.00650608   | 1.2906  | E15.5 * Wnt1 up vs E15.5 * Ctrl |
| 10536390 Glcci1        | NM_133236     | 5.62178e-005 | 1.29025 | E15.5 * Wnt1 up vs E15.5 * Ctrl |
| 10463486 Btrc          | NM_001037758  | 0.00189866   | 1.29015 | E15.5 * Wnt1 up vs E15.5 * Ctrl |
| 10558239 Hmx3          | NM_008257     | 0.0104567    | 1.28956 | E15.5 * Wnt1 up vs E15.5 * Ctrl |
| 10424349 Sqle          | NM_009270     | 0.001028     | 1.28954 | E15.5 * Wnt1 up vs E15.5 * Ctrl |
| 10486616 Ubr1          | NM_009461     | 0.000279525  | 1.28928 | E15.5 * Wnt1 up vs E15.5 * Ctrl |
| 10594551 Zfp609        | NM_172536     | 0.00092612   | 1.28926 | E15.5 * Wnt1 up vs E15.5 * Ctrl |
| 10483381 Stk39         | NM_016866     | 5.98802e-005 | 1.28923 | E15.5 * Wnt1 up vs E15.5 * Ctrl |
| 10567591 Usp31         | NM_001033173  | 9.97072e-005 | 1.28896 | E15.5 * Wnt1 up vs E15.5 * Ctrl |
| 10517383 Nipa13        | NM_028995     | 0.0011411    | 1.28894 | E15.5 * Wnt1 up vs E15.5 * Ctrl |
| 10529549 Tbc1d14       | NM_001113362  | 0.000689898  | 1.2886  | E15.5 * Wnt1 up vs E15.5 * Ctrl |
| 10574607 EG13909       | NM_144511     | 0.00736173   | 1.28858 | E15.5 * Wnt1 up vs E15.5 * Ctrl |
| 10358654 Hmcn1         | NM_001024720  | 0.00462508   | 1.28855 | E15.5 * Wnt1 up vs E15.5 * Ctrl |
| 10523905 Mtf2          | NM_013827     | 8.55021e-007 | 1.28832 | E15.5 * Wnt1 up vs E15.5 * Ctrl |
| 10504139 4933409K07Rik | BC059060      | 0.00215017   | 1.28796 | E15.5 * Wnt1 up vs E15.5 * Ctrl |
| 10453634 ENSMUSG000000 | ENSMUST000000 | 0.00450045   | 1.28774 | E15.5 * Wnt1 up vs E15.5 * Ctrl |
| 10547408 Erc1          | NM_053204     | 0.0146925    | 1.28719 | E15.5 * Wnt1 up vs E15.5 * Ctrl |
| 10511226 Acap3         | NM_207223     | 0.00151699   | 1.28719 | E15.5 * Wnt1 up vs E15.5 * Ctrl |
| 10597134 Scap          | NM_001001144  | 0.00141984   | 1.2871  | E15.5 * Wnt1 up vs E15.5 * Ctrl |
| 10596900 Tcta          | NM_133986     | 0.00912748   | 1.28708 | E15.5 * Wnt1 up vs E15.5 * Ctrl |
| 10462005 Tmem2         | NM_031997     | 0.000441352  | 1.28681 | E15.5 * Wnt1 up vs E15.5 * Ctrl |
| 10579915 Smarca5       | NM_053124     | 0.00196686   | 1.2868  | E15.5 * Wnt1 up vs E15.5 * Ctrl |
| 10413185 Zmiz1         | NM_183208     | 0.00206175   | 1.28631 | E15.5 * Wnt1 up vs E15.5 * Ctrl |
| 10593193               | ---           | 0.00792541   | 1.28616 | E15.5 * Wnt1 up vs E15.5 * Ctrl |
| 10589099 Ip6k2         | NM_029634     | 0.00474648   | 1.28589 | E15.5 * Wnt1 up vs E15.5 * Ctrl |
| 10600372 B230340J04Rik | ENSMUST000000 | 0.00139832   | 1.28579 | E15.5 * Wnt1 up vs E15.5 * Ctrl |
| 10526356 Rhbdd2        | NM_146002     | 0.000977609  | 1.28576 | E15.5 * Wnt1 up vs E15.5 * Ctrl |
| 10483737 Atf2          | NM_001025093  | 0.000326845  | 1.28572 | E15.5 * Wnt1 up vs E15.5 * Ctrl |
| 10569265 Tollip        | NM_023764     | 0.000743767  | 1.28562 | E15.5 * Wnt1 up vs E15.5 * Ctrl |
| 10533734 Abcb9         | NM_019875     | 0.00439682   | 1.28538 | E15.5 * Wnt1 up vs E15.5 * Ctrl |

|                        |                        |              |         |                                 |
|------------------------|------------------------|--------------|---------|---------------------------------|
| 10508412 Fndc5         | NM_027402              | 0.0052278    | 1.285   | E15.5 * Wnt1 up vs E15.5 * Ctrl |
| 10421717 Gm1587        | NM_001033440           | 0.00024915   | 1.28492 | E15.5 * Wnt1 up vs E15.5 * Ctrl |
| 10576696 Insr          | NM_010568              | 4.94785e-005 | 1.28491 | E15.5 * Wnt1 up vs E15.5 * Ctrl |
| 10489065 Ndr3          | NM_013865              | 0.000516402  | 1.28467 | E15.5 * Wnt1 up vs E15.5 * Ctrl |
| 10351013 Rc3h1         | NM_001024952           | 0.00105048   | 1.28452 | E15.5 * Wnt1 up vs E15.5 * Ctrl |
| 10533085 Pebp1         | NM_018858              | 0.00480108   | 1.28443 | E15.5 * Wnt1 up vs E15.5 * Ctrl |
| 10382492 Otop3         | NM_027132              | 0.000701237  | 1.28441 | E15.5 * Wnt1 up vs E15.5 * Ctrl |
| 10453141 Sos1          | NM_009231              | 0.00167057   | 1.2842  | E15.5 * Wnt1 up vs E15.5 * Ctrl |
| 10449523 Pxt1          | NM_153390              | 0.00116884   | 1.28418 | E15.5 * Wnt1 up vs E15.5 * Ctrl |
| 10427997 Ankrd33b      | NM_027496              | 0.00353589   | 1.28413 | E15.5 * Wnt1 up vs E15.5 * Ctrl |
| 10439675 Tmprss7       | NM_172455              | 1.82361e-005 | 1.28397 | E15.5 * Wnt1 up vs E15.5 * Ctrl |
| 10493891 Ywhaz         | NM_011740              | 2.1484e-008  | 1.28391 | E15.5 * Wnt1 up vs E15.5 * Ctrl |
| 10545528 Ptgfr         | NM_001159616           | 0.0070967    | 1.28371 | E15.5 * Wnt1 up vs E15.5 * Ctrl |
| 10373810 Dusp18        | NM_173745              | 0.00705289   | 1.28363 | E15.5 * Wnt1 up vs E15.5 * Ctrl |
| 10479154 Tubb1         | NM_001080971           | 0.00469976   | 1.28357 | E15.5 * Wnt1 up vs E15.5 * Ctrl |
| 10598882 Uba1          | NM_009457              | 1.84341e-006 | 1.28325 | E15.5 * Wnt1 up vs E15.5 * Ctrl |
| 10534489 Ccl26         | NM_001013412           | 0.000148719  | 1.28316 | E15.5 * Wnt1 up vs E15.5 * Ctrl |
| 10457302 Epc1          | NM_007935              | 6.6826e-006  | 1.28311 | E15.5 * Wnt1 up vs E15.5 * Ctrl |
| 10510254 Fv1           | NM_010244              | 0.0136888    | 1.28275 | E15.5 * Wnt1 up vs E15.5 * Ctrl |
| 10349401 Gpr39         | NM_027677              | 0.000275562  | 1.28249 | E15.5 * Wnt1 up vs E15.5 * Ctrl |
| 10464015 Shoc2         | NM_019658              | 3.88102e-005 | 1.28246 | E15.5 * Wnt1 up vs E15.5 * Ctrl |
| 10401684 Angel1        | NM_144524              | 0.00362682   | 1.28245 | E15.5 * Wnt1 up vs E15.5 * Ctrl |
| 10441642 Brp44l        | NM_018819              | 0.0113653    | 1.28232 | E15.5 * Wnt1 up vs E15.5 * Ctrl |
| 10479268 Wtap          | NM_001113533           | 0.000667569  | 1.28215 | E15.5 * Wnt1 up vs E15.5 * Ctrl |
| 10563820 Svip          | ENSMUST000001          | 0.00310454   | 1.2817  | E15.5 * Wnt1 up vs E15.5 * Ctrl |
| 10596664 Cyb561d2      | NM_019720              | 0.000305075  | 1.28162 | E15.5 * Wnt1 up vs E15.5 * Ctrl |
| 10536805 Fam71f1       | NM_207258              | 0.010376     | 1.28152 | E15.5 * Wnt1 up vs E15.5 * Ctrl |
| 10526781 Mblac1        | NM_177878              | 0.00543381   | 1.28143 | E15.5 * Wnt1 up vs E15.5 * Ctrl |
| 10399632               | ---                    | 0.00395134   | 1.28134 | E15.5 * Wnt1 up vs E15.5 * Ctrl |
| 10450579 Ddr1          | NM_007584              | 0.0138794    | 1.28105 | E15.5 * Wnt1 up vs E15.5 * Ctrl |
| 10452874 Atp6v1f       | NM_025381              | 0.00694355   | 1.28065 | E15.5 * Wnt1 up vs E15.5 * Ctrl |
| 10450845 Mog           | NM_010814              | 0.00235619   | 1.28054 | E15.5 * Wnt1 up vs E15.5 * Ctrl |
| 10487154 Secisbp2l     | NM_177608              | 0.000127319  | 1.2805  | E15.5 * Wnt1 up vs E15.5 * Ctrl |
| 10372151 Lrrig1        | BC051400               | 0.0100309    | 1.28045 | E15.5 * Wnt1 up vs E15.5 * Ctrl |
| 10429428 Gm628         | AK132992               | 0.00358386   | 1.28044 | E15.5 * Wnt1 up vs E15.5 * Ctrl |
| 10455104 Pcdhb15       | NM_053140              | 0.0041415    | 1.28029 | E15.5 * Wnt1 up vs E15.5 * Ctrl |
| 10413874 Ogdhl         | NM_001081130           | 0.0084437    | 1.28026 | E15.5 * Wnt1 up vs E15.5 * Ctrl |
| 10603373 Pqbp1         | NM_019478              | 0.000433786  | 1.28026 | E15.5 * Wnt1 up vs E15.5 * Ctrl |
| 10358668 Hmcn1         | NM_001024720           | 0.00160765   | 1.28021 | E15.5 * Wnt1 up vs E15.5 * Ctrl |
| 10362520 Hdac2         | NM_008229              | 1.84059e-005 | 1.28009 | E15.5 * Wnt1 up vs E15.5 * Ctrl |
| 10545891 Cml1          | NM_023160              | 0.00454603   | 1.28006 | E15.5 * Wnt1 up vs E15.5 * Ctrl |
| 10518492 Ptchd2        | NM_001083342           | 0.00237518   | 1.27971 | E15.5 * Wnt1 up vs E15.5 * Ctrl |
| 10439915               | ---                    | 0.000805197  | 1.27968 | E15.5 * Wnt1 up vs E15.5 * Ctrl |
| 10493565 Adar          | NM_001038587           | 2.02427e-005 | 1.27956 | E15.5 * Wnt1 up vs E15.5 * Ctrl |
| 10383767 Osbp2         | NM_152818              | 0.0120108    | 1.27952 | E15.5 * Wnt1 up vs E15.5 * Ctrl |
| 10378681 Inpp5k        | NM_008916              | 0.0085503    | 1.27947 | E15.5 * Wnt1 up vs E15.5 * Ctrl |
| 10371420 Prdm4         | NM_181650              | 0.00806562   | 1.27934 | E15.5 * Wnt1 up vs E15.5 * Ctrl |
| 10483246               | ---                    | 0.00788147   | 1.27919 | E15.5 * Wnt1 up vs E15.5 * Ctrl |
| 10607244               | ---                    | 0.003115     | 1.27917 | E15.5 * Wnt1 up vs E15.5 * Ctrl |
| 10429341 Ptk2          | NM_007982              | 0.000974898  | 1.27884 | E15.5 * Wnt1 up vs E15.5 * Ctrl |
| 10563941               | ---                    | 0.00056513   | 1.27882 | E15.5 * Wnt1 up vs E15.5 * Ctrl |
| 10371032 Diras1        | NM_145217              | 0.000939699  | 1.27881 | E15.5 * Wnt1 up vs E15.5 * Ctrl |
| 10403658 Gng4          | NM_010317              | 0.000613748  | 1.27877 | E15.5 * Wnt1 up vs E15.5 * Ctrl |
| 10563963               | ---                    | 0.000421021  | 1.27875 | E15.5 * Wnt1 up vs E15.5 * Ctrl |
| 10563969               | ---                    | 0.000421021  | 1.27875 | E15.5 * Wnt1 up vs E15.5 * Ctrl |
| 10563977               | ---                    | 0.000421021  | 1.27875 | E15.5 * Wnt1 up vs E15.5 * Ctrl |
| 10563979               | ---                    | 0.000421021  | 1.27875 | E15.5 * Wnt1 up vs E15.5 * Ctrl |
| 10563983               | 100040985 XM_001475615 | 0.000421021  | 1.27875 | E15.5 * Wnt1 up vs E15.5 * Ctrl |
| 10563985               | ---                    | 0.000421021  | 1.27875 | E15.5 * Wnt1 up vs E15.5 * Ctrl |
| 10416793 Uchl3         | NM_016723              | 0.00749954   | 1.27816 | E15.5 * Wnt1 up vs E15.5 * Ctrl |
| 10486322               | ---                    | 8.17258e-005 | 1.27738 | E15.5 * Wnt1 up vs E15.5 * Ctrl |
| 10491363 Mfn1          | NM_024200              | 3.16708e-005 | 1.27731 | E15.5 * Wnt1 up vs E15.5 * Ctrl |
| 10348653 Gpc1          | NM_016696              | 0.00690391   | 1.27725 | E15.5 * Wnt1 up vs E15.5 * Ctrl |
| 10374934 Psme4         | NM_134013              | 0.000483121  | 1.27698 | E15.5 * Wnt1 up vs E15.5 * Ctrl |
| 10384737 Papolg        | NM_172555              | 0.00299166   | 1.27683 | E15.5 * Wnt1 up vs E15.5 * Ctrl |
| 10599576 2700038C09Rik | NM_025598              | 0.000284312  | 1.27673 | E15.5 * Wnt1 up vs E15.5 * Ctrl |

|                        |               |              |         |                                 |
|------------------------|---------------|--------------|---------|---------------------------------|
| 10544243 Mrps33        | NM_010270     | 0.000671022  | 1.27654 | E15.5 * Wnt1 up vs E15.5 * Ctrl |
| 10486552 Lrrc57        | NM_001159612  | 0.000301362  | 1.27634 | E15.5 * Wnt1 up vs E15.5 * Ctrl |
| 10406171 Tppp          | NM_182839     | 0.00546419   | 1.27631 | E15.5 * Wnt1 up vs E15.5 * Ctrl |
| 10535449 E130309D02Rik | NM_172726     | 0.0100322    | 1.27599 | E15.5 * Wnt1 up vs E15.5 * Ctrl |
| 10574985 Slc7a6        | NM_178798     | 0.00275231   | 1.27588 | E15.5 * Wnt1 up vs E15.5 * Ctrl |
| 10401564 1110018G07Rik | NM_178065     | 0.000153813  | 1.27579 | E15.5 * Wnt1 up vs E15.5 * Ctrl |
| 10451104 Tmem151b      | NM_001013749  | 0.00667646   | 1.27543 | E15.5 * Wnt1 up vs E15.5 * Ctrl |
| 10407097 Pde4d         | NM_011056     | 4.88934e-006 | 1.27529 | E15.5 * Wnt1 up vs E15.5 * Ctrl |
| 10422892 2410089E03Rik | ENSMUST000001 | 0.00867096   | 1.27524 | E15.5 * Wnt1 up vs E15.5 * Ctrl |
| 10557508 Doc2a         | NM_010069     | 0.000873355  | 1.27514 | E15.5 * Wnt1 up vs E15.5 * Ctrl |
| 10432566               | ---           | 0.00151725   | 1.275   | E15.5 * Wnt1 up vs E15.5 * Ctrl |
| 10359770 Pou2f1        | NM_011137     | 0.000237991  | 1.27494 | E15.5 * Wnt1 up vs E15.5 * Ctrl |
| 10466423 Cep78         | NM_198019     | 0.000589887  | 1.27478 | E15.5 * Wnt1 up vs E15.5 * Ctrl |
| 10551469 Dyrk1b        | NM_001037957  | 0.00058292   | 1.27475 | E15.5 * Wnt1 up vs E15.5 * Ctrl |
| 10399265 Ncoa1         | NM_010881     | 0.000176431  | 1.27466 | E15.5 * Wnt1 up vs E15.5 * Ctrl |
| 10555550 Clpb          | NM_009191     | 0.00020559   | 1.27459 | E15.5 * Wnt1 up vs E15.5 * Ctrl |
| 10571849 Fbxo8         | NM_015791     | 0.0130133    | 1.27453 | E15.5 * Wnt1 up vs E15.5 * Ctrl |
| 10390653 Med24         | NM_011869     | 0.000104901  | 1.27394 | E15.5 * Wnt1 up vs E15.5 * Ctrl |
| 10442294 Vmn2r115      | NM_001104579  | 0.012078     | 1.27365 | E15.5 * Wnt1 up vs E15.5 * Ctrl |
| 10429216 Fam135b       | NM_177819     | 0.00255992   | 1.27356 | E15.5 * Wnt1 up vs E15.5 * Ctrl |
| 10484884 Olfr1272      | NM_146980     | 0.00211752   | 1.27344 | E15.5 * Wnt1 up vs E15.5 * Ctrl |
| 10508436 Sync          | NM_023485     | 0.00458984   | 1.27328 | E15.5 * Wnt1 up vs E15.5 * Ctrl |
| 10579043 Lzts1         | NM_199364     | 0.00256269   | 1.27326 | E15.5 * Wnt1 up vs E15.5 * Ctrl |
| 10542515 Capza3        | NM_007605     | 0.00940948   | 1.27319 | E15.5 * Wnt1 up vs E15.5 * Ctrl |
| 10418300 Cacna2d3      | NM_009785     | 0.00895911   | 1.27309 | E15.5 * Wnt1 up vs E15.5 * Ctrl |
| 10582837               | ---           | 0.0110739    | 1.27292 | E15.5 * Wnt1 up vs E15.5 * Ctrl |
| 10391043 Krt9          | NM_201255     | 0.00329823   | 1.2729  | E15.5 * Wnt1 up vs E15.5 * Ctrl |
| 10436892 Itsn1         | NM_010587     | 0.0010124    | 1.27285 | E15.5 * Wnt1 up vs E15.5 * Ctrl |
| 10581625 2400003C14Rik | BC039052      | 0.00389609   | 1.27262 | E15.5 * Wnt1 up vs E15.5 * Ctrl |
| 10454831 Paip2         | NM_026420     | 0.000369008  | 1.2725  | E15.5 * Wnt1 up vs E15.5 * Ctrl |
| 10403466 Dip2c         | NM_001081426  | 0.00280988   | 1.27235 | E15.5 * Wnt1 up vs E15.5 * Ctrl |
| 10422718 Ttc33         | NM_026213     | 9.44748e-005 | 1.27208 | E15.5 * Wnt1 up vs E15.5 * Ctrl |
| 10472970 Hoxd4         | NM_010469     | 0.00538301   | 1.27194 | E15.5 * Wnt1 up vs E15.5 * Ctrl |
| 10450744 677333        | XR_031734     | 0.000108553  | 1.2719  | E15.5 * Wnt1 up vs E15.5 * Ctrl |
| 10453256 Kcng3         | NM_153512     | 0.000114205  | 1.27188 | E15.5 * Wnt1 up vs E15.5 * Ctrl |
| 10536483 Tes           | NM_207176     | 1.68048e-007 | 1.27163 | E15.5 * Wnt1 up vs E15.5 * Ctrl |
| 10435162 Lrch3         | NM_001081255  | 0.00036204   | 1.2713  | E15.5 * Wnt1 up vs E15.5 * Ctrl |
| 10534839 Pop7          | NM_028753     | 0.00720191   | 1.27123 | E15.5 * Wnt1 up vs E15.5 * Ctrl |
| 10515994 Smap2         | NM_133716     | 0.00173702   | 1.27114 | E15.5 * Wnt1 up vs E15.5 * Ctrl |
| 10574866 Pard6a        | NM_001047436  | 0.00701171   | 1.27104 | E15.5 * Wnt1 up vs E15.5 * Ctrl |
| 10404815 Sirt5         | NM_178848     | 0.00242551   | 1.27093 | E15.5 * Wnt1 up vs E15.5 * Ctrl |
| 10358023 Gpr37l1       | NM_134438     | 0.00949322   | 1.27074 | E15.5 * Wnt1 up vs E15.5 * Ctrl |
| 10394812               | ---           | 0.000561328  | 1.2707  | E15.5 * Wnt1 up vs E15.5 * Ctrl |
| 10439960 Cep97         | NM_028815     | 0.00383546   | 1.27041 | E15.5 * Wnt1 up vs E15.5 * Ctrl |
| 10405287 Higd2a        | NM_025933     | 0.00857503   | 1.27041 | E15.5 * Wnt1 up vs E15.5 * Ctrl |
| 10521415 Ablim2        | NM_177678     | 0.000732303  | 1.2702  | E15.5 * Wnt1 up vs E15.5 * Ctrl |
| 10451481 BC032203      | NM_001100452  | 0.013253     | 1.27018 | E15.5 * Wnt1 up vs E15.5 * Ctrl |
| 10346764 Abi2          | NM_198127     | 5.74915e-005 | 1.26997 | E15.5 * Wnt1 up vs E15.5 * Ctrl |
| 10563991               | ---           | 0.000641104  | 1.26991 | E15.5 * Wnt1 up vs E15.5 * Ctrl |
| 10521136 Whsc1         | NM_001081102  | 6.68501e-005 | 1.26982 | E15.5 * Wnt1 up vs E15.5 * Ctrl |
| 10515894 1700041C02Rik | NM_029286     | 0.00440615   | 1.26973 | E15.5 * Wnt1 up vs E15.5 * Ctrl |
| 10419062 Sh2d4b        | NM_177816     | 0.000492974  | 1.26949 | E15.5 * Wnt1 up vs E15.5 * Ctrl |
| 10505587 Kdm4c         | NM_144787     | 0.000797763  | 1.26945 | E15.5 * Wnt1 up vs E15.5 * Ctrl |
| 10386758 Slc5a10       | NM_001033227  | 0.00319272   | 1.26944 | E15.5 * Wnt1 up vs E15.5 * Ctrl |
| 10380501 Dlx3          | NM_010055     | 0.000348236  | 1.26926 | E15.5 * Wnt1 up vs E15.5 * Ctrl |
| 10599927 Aff2          | NM_008032     | 0.0147959    | 1.26897 | E15.5 * Wnt1 up vs E15.5 * Ctrl |
| 10510399 Masp2         | NM_001003893  | 0.0041497    | 1.26848 | E15.5 * Wnt1 up vs E15.5 * Ctrl |
| 10358656 Hmcn1         | NM_001024720  | 0.00268401   | 1.26844 | E15.5 * Wnt1 up vs E15.5 * Ctrl |
| 10480139 C1ql3         | NM_153155     | 0.0146763    | 1.26832 | E15.5 * Wnt1 up vs E15.5 * Ctrl |
| 10570144 Arhgef7       | NM_001113518  | 0.000150069  | 1.26831 | E15.5 * Wnt1 up vs E15.5 * Ctrl |
| 10345492 Cnnm3         | NM_001039551  | 0.000396404  | 1.26811 | E15.5 * Wnt1 up vs E15.5 * Ctrl |
| 10545417 Mat2a         | NM_145569     | 1.15378e-005 | 1.2681  | E15.5 * Wnt1 up vs E15.5 * Ctrl |
| 10418898 Ppyr1         | NM_008919     | 0.0143374    | 1.26792 | E15.5 * Wnt1 up vs E15.5 * Ctrl |
| 10439566 Atp6v1a       | NM_007508     | 0.000201063  | 1.26786 | E15.5 * Wnt1 up vs E15.5 * Ctrl |
| 10405619 5133401N09Rik | NM_198004     | 0.000927599  | 1.2674  | E15.5 * Wnt1 up vs E15.5 * Ctrl |
| 10365601 Gnptab        | NM_001004164  | 0.00138534   | 1.26734 | E15.5 * Wnt1 up vs E15.5 * Ctrl |

|          |               |              |              |         |                                 |
|----------|---------------|--------------|--------------|---------|---------------------------------|
| 10576056 | Map1lc3b      | NM_026160    | 0.000613757  | 1.26726 | E15.5 * Wnt1 up vs E15.5 * Ctrl |
| 10420155 | Dhrs1         | NM_026819    | 0.00892119   | 1.26689 | E15.5 * Wnt1 up vs E15.5 * Ctrl |
| 10387108 | OTTMUSG00000  | ENSMUST00000 | 0.00378375   | 1.2668  | E15.5 * Wnt1 up vs E15.5 * Ctrl |
| 10443764 | Slc37a1       | NM_153062    | 2.05248e-005 | 1.26675 | E15.5 * Wnt1 up vs E15.5 * Ctrl |
| 10512059 | Lingo2        | ENSMUST00000 | 0.0108657    | 1.26641 | E15.5 * Wnt1 up vs E15.5 * Ctrl |
| 10472994 | Mtx2          | NM_016804    | 5.92884e-005 | 1.2664  | E15.5 * Wnt1 up vs E15.5 * Ctrl |
| 10531323 | G3bp2         | NM_011816    | 0.000121366  | 1.26626 | E15.5 * Wnt1 up vs E15.5 * Ctrl |
| 10513143 | Ptpn3         | NM_011207    | 0.0010166    | 1.26616 | E15.5 * Wnt1 up vs E15.5 * Ctrl |
| 10437992 | Dnm1l         | NM_152816    | 0.000142495  | 1.26594 | E15.5 * Wnt1 up vs E15.5 * Ctrl |
| 10562419 | Lrp3          | NM_001024707 | 0.00683225   | 1.2658  | E15.5 * Wnt1 up vs E15.5 * Ctrl |
| 10514366 | Glr3          | NM_023140    | 0.0138787    | 1.26573 | E15.5 * Wnt1 up vs E15.5 * Ctrl |
| 10430384 | Elfn2         | NM_183141    | 0.00380344   | 1.26542 | E15.5 * Wnt1 up vs E15.5 * Ctrl |
| 10584855 | Scn2b         | NM_001014761 | 0.00205004   | 1.26497 | E15.5 * Wnt1 up vs E15.5 * Ctrl |
| 10607246 | Tmem29        | ENSMUST00000 | 0.00298472   | 1.26489 | E15.5 * Wnt1 up vs E15.5 * Ctrl |
| 10524004 | Pcgf3         | NM_172716    | 7.74119e-005 | 1.26487 | E15.5 * Wnt1 up vs E15.5 * Ctrl |
| 10455656 | Hsd17b4       | NM_008292    | 3.2358e-005  | 1.26486 | E15.5 * Wnt1 up vs E15.5 * Ctrl |
| 10591253 | 5730601F06Rik | NM_001082485 | 0.0012836    | 1.26479 | E15.5 * Wnt1 up vs E15.5 * Ctrl |
| 10564482 | Synm          | NM_201639    | 0.00169616   | 1.26479 | E15.5 * Wnt1 up vs E15.5 * Ctrl |
| 10529385 | Zfyve28       | NM_001015039 | 0.00332659   | 1.26474 | E15.5 * Wnt1 up vs E15.5 * Ctrl |
| 10564290 | Klf13         | NM_021366    | 0.0068382    | 1.26452 | E15.5 * Wnt1 up vs E15.5 * Ctrl |
| 10562416 | Cebpg         | NM_009884    | 0.00108366   | 1.26449 | E15.5 * Wnt1 up vs E15.5 * Ctrl |
| 10470543 | Gm347         | BC070440     | 0.0018944    | 1.26426 | E15.5 * Wnt1 up vs E15.5 * Ctrl |
| 10544252 | E330009J07Rik | NM_175528    | 0.000180261  | 1.26405 | E15.5 * Wnt1 up vs E15.5 * Ctrl |
| 10585610 | Ptpn9         | NM_019651    | 0.000145094  | 1.26396 | E15.5 * Wnt1 up vs E15.5 * Ctrl |
| 10388337 | Pafah1b1      | NM_013625    | 2.72113e-005 | 1.26395 | E15.5 * Wnt1 up vs E15.5 * Ctrl |
| 10594480 | Rab11a        | NM_017382    | 3.93427e-005 | 1.26365 | E15.5 * Wnt1 up vs E15.5 * Ctrl |
| 10577432 | ---           | ---          | 0.00136046   | 1.26359 | E15.5 * Wnt1 up vs E15.5 * Ctrl |
| 10468180 | Psd           | NM_028627    | 0.00505187   | 1.26352 | E15.5 * Wnt1 up vs E15.5 * Ctrl |
| 10385155 | Fbll1         | NM_001004147 | 0.00509214   | 1.26352 | E15.5 * Wnt1 up vs E15.5 * Ctrl |
| 10501649 | Rtcd1         | NM_025517    | 7.19268e-006 | 1.26343 | E15.5 * Wnt1 up vs E15.5 * Ctrl |
| 10552668 | Lrrc4b        | NM_198250    | 0.00388639   | 1.26323 | E15.5 * Wnt1 up vs E15.5 * Ctrl |
| 10520003 | Armc10        | NM_026034    | 0.0132626    | 1.26312 | E15.5 * Wnt1 up vs E15.5 * Ctrl |
| 10521587 | Dnaja1        | NM_008298    | 2.30269e-006 | 1.26294 | E15.5 * Wnt1 up vs E15.5 * Ctrl |
| 10547858 | Gnb3          | NM_013530    | 0.00369095   | 1.26292 | E15.5 * Wnt1 up vs E15.5 * Ctrl |
| 10346310 | Mobkl3        | NM_025283    | 0.000651655  | 1.26283 | E15.5 * Wnt1 up vs E15.5 * Ctrl |
| 10583459 | 5730577I03Rik | NM_175110    | 0.000674403  | 1.26271 | E15.5 * Wnt1 up vs E15.5 * Ctrl |
| 10552982 | Plekha4       | NM_148927    | 0.00105178   | 1.26244 | E15.5 * Wnt1 up vs E15.5 * Ctrl |
| 10454229 | Khlh14        | NM_001081403 | 0.00477983   | 1.2621  | E15.5 * Wnt1 up vs E15.5 * Ctrl |
| 10578904 | Cpe           | NM_013494    | 0.00029946   | 1.26206 | E15.5 * Wnt1 up vs E15.5 * Ctrl |
| 10448748 | Nubp2         | NM_011956    | 0.000601247  | 1.26206 | E15.5 * Wnt1 up vs E15.5 * Ctrl |
| 10356514 | Iqca          | ENSMUST00000 | 0.00655248   | 1.26205 | E15.5 * Wnt1 up vs E15.5 * Ctrl |
| 10368992 | EG668252      | XR_033560    | 0.0101672    | 1.26175 | E15.5 * Wnt1 up vs E15.5 * Ctrl |
| 10384685 | 1700093K21Rik | NM_026105    | 0.00509565   | 1.26173 | E15.5 * Wnt1 up vs E15.5 * Ctrl |
| 10533644 | Vps33a        | NM_029929    | 0.000242653  | 1.26166 | E15.5 * Wnt1 up vs E15.5 * Ctrl |
| 10551462 | ---           | ---          | 0.00334205   | 1.26166 | E15.5 * Wnt1 up vs E15.5 * Ctrl |
| 10421012 | Ppp2r2a       | NM_028032    | 5.39887e-005 | 1.26159 | E15.5 * Wnt1 up vs E15.5 * Ctrl |
| 10519354 | Pex1          | NM_027777    | 0.00050455   | 1.26154 | E15.5 * Wnt1 up vs E15.5 * Ctrl |
| 10467328 | 5730455O13Rik | NM_001081075 | 0.00270667   | 1.26151 | E15.5 * Wnt1 up vs E15.5 * Ctrl |
| 10463789 | Neurl1a       | NM_021360    | 0.00055819   | 1.26119 | E15.5 * Wnt1 up vs E15.5 * Ctrl |
| 10455199 | Rel2          | NM_153793    | 0.00813324   | 1.26108 | E15.5 * Wnt1 up vs E15.5 * Ctrl |
| 10387655 | Spem1         | NM_028855    | 0.00845317   | 1.26108 | E15.5 * Wnt1 up vs E15.5 * Ctrl |
| 10576944 | ENSMUSG00000  | ENSMUST00000 | 0.00214799   | 1.26107 | E15.5 * Wnt1 up vs E15.5 * Ctrl |
| 10589057 | ---           | ---          | 0.00424862   | 1.26102 | E15.5 * Wnt1 up vs E15.5 * Ctrl |
| 10424945 | Kifc2         | NM_010630    | 0.00391254   | 1.26091 | E15.5 * Wnt1 up vs E15.5 * Ctrl |
| 10375926 | Ppp2ca        | NM_019411    | 4.22292e-006 | 1.26068 | E15.5 * Wnt1 up vs E15.5 * Ctrl |
| 10484704 | Olf1157       | NM_146849    | 0.000947915  | 1.26067 | E15.5 * Wnt1 up vs E15.5 * Ctrl |
| 10582229 | 1110003O08Rik | ENSMUST00000 | 0.0114464    | 1.26047 | E15.5 * Wnt1 up vs E15.5 * Ctrl |
| 10521168 | Nat8l         | NM_001001985 | 0.000558401  | 1.26038 | E15.5 * Wnt1 up vs E15.5 * Ctrl |
| 10580056 | Lphn1         | NM_181039    | 0.0040474    | 1.2602  | E15.5 * Wnt1 up vs E15.5 * Ctrl |
| 10413897 | Ercc6         | NM_001081221 | 0.00184236   | 1.26009 | E15.5 * Wnt1 up vs E15.5 * Ctrl |
| 10588874 | Bsn           | NM_007567    | 0.0035018    | 1.25998 | E15.5 * Wnt1 up vs E15.5 * Ctrl |
| 10578157 | Tnks          | NM_175091    | 0.000680713  | 1.2599  | E15.5 * Wnt1 up vs E15.5 * Ctrl |
| 10585533 | Dnajb6        | NM_011847    | 0.000926     | 1.25984 | E15.5 * Wnt1 up vs E15.5 * Ctrl |
| 10376245 | Gria1         | NM_001113325 | 0.00108489   | 1.2596  | E15.5 * Wnt1 up vs E15.5 * Ctrl |
| 10456194 | Napq          | NM_028017    | 0.000243382  | 1.25959 | E15.5 * Wnt1 up vs E15.5 * Ctrl |
| 10415159 | Thtpa         | NM_153083    | 0.00448161   | 1.25937 | E15.5 * Wnt1 up vs E15.5 * Ctrl |

|          |               |              |              |         |                                 |
|----------|---------------|--------------|--------------|---------|---------------------------------|
| 10456140 | Sh3tc2        | NM_172628    | 0.0133484    | 1.25937 | E15.5 * Wnt1 up vs E15.5 * Ctrl |
| 10568099 | Tmem219       | NM_026827    | 0.00347908   | 1.25922 | E15.5 * Wnt1 up vs E15.5 * Ctrl |
| 10422393 | ---           | ---          | 0.00442871   | 1.25919 | E15.5 * Wnt1 up vs E15.5 * Ctrl |
| 10449471 | Srpkl         | NM_016795    | 0.000295863  | 1.25911 | E15.5 * Wnt1 up vs E15.5 * Ctrl |
| 10399478 | Lpin1         | NM_015763    | 0.00956342   | 1.25906 | E15.5 * Wnt1 up vs E15.5 * Ctrl |
| 10400131 | ENSMUSG00000  | ENSMUST00000 | 0.00172781   | 1.25899 | E15.5 * Wnt1 up vs E15.5 * Ctrl |
| 10413670 | Pbrm1         | NM_001081251 | 0.0001543    | 1.25889 | E15.5 * Wnt1 up vs E15.5 * Ctrl |
| 10535900 | ---           | ---          | 0.0109228    | 1.25889 | E15.5 * Wnt1 up vs E15.5 * Ctrl |
| 10398885 | AW555464      | NM_001024602 | 0.00300717   | 1.25883 | E15.5 * Wnt1 up vs E15.5 * Ctrl |
| 10479615 | C430010C01    | AK082896     | 0.00644613   | 1.25883 | E15.5 * Wnt1 up vs E15.5 * Ctrl |
| 10385523 | ---           | ---          | 0.00652998   | 1.2587  | E15.5 * Wnt1 up vs E15.5 * Ctrl |
| 10420348 | Zmym5         | NM_144842    | 0.00172305   | 1.25857 | E15.5 * Wnt1 up vs E15.5 * Ctrl |
| 10345423 | Plekhhb2      | NM_145516    | 0.00402542   | 1.25842 | E15.5 * Wnt1 up vs E15.5 * Ctrl |
| 10378964 | Sez6          | NM_021286    | 0.00663675   | 1.25835 | E15.5 * Wnt1 up vs E15.5 * Ctrl |
| 10456317 | Zfp532        | NM_207255    | 2.1528e-005  | 1.25833 | E15.5 * Wnt1 up vs E15.5 * Ctrl |
| 10484563 | Olfr1043      | NM_146577    | 0.00731862   | 1.25831 | E15.5 * Wnt1 up vs E15.5 * Ctrl |
| 10406953 | Trim23        | NM_030731    | 0.0130211    | 1.25827 | E15.5 * Wnt1 up vs E15.5 * Ctrl |
| 10525751 | Ddx55         | NM_026409    | 0.00444481   | 1.25824 | E15.5 * Wnt1 up vs E15.5 * Ctrl |
| 10391178 | Dnajc7        | NM_019795    | 1.64101e-005 | 1.25818 | E15.5 * Wnt1 up vs E15.5 * Ctrl |
| 10555235 | Arb1          | NM_177231    | 0.000348237  | 1.25817 | E15.5 * Wnt1 up vs E15.5 * Ctrl |
| 10494735 | Gdap2         | NM_010269    | 0.0145051    | 1.25815 | E15.5 * Wnt1 up vs E15.5 * Ctrl |
| 10499299 | Hapln2        | NM_022031    | 0.000125949  | 1.25793 | E15.5 * Wnt1 up vs E15.5 * Ctrl |
| 10381419 | Nbr1          | NM_008676    | 0.00642835   | 1.25765 | E15.5 * Wnt1 up vs E15.5 * Ctrl |
| 10563829 | Mrps33        | NM_010270    | 0.000780152  | 1.25706 | E15.5 * Wnt1 up vs E15.5 * Ctrl |
| 10360187 | Vangl2        | NM_033509    | 0.00595779   | 1.25701 | E15.5 * Wnt1 up vs E15.5 * Ctrl |
| 10408487 | Uqcrf51       | NM_025710    | 0.00138964   | 1.25696 | E15.5 * Wnt1 up vs E15.5 * Ctrl |
| 10514971 | Zyg11a        | ENSMUST00000 | 0.0071205    | 1.25682 | E15.5 * Wnt1 up vs E15.5 * Ctrl |
| 10461898 | Rfk           | NM_019437    | 0.00102029   | 1.25681 | E15.5 * Wnt1 up vs E15.5 * Ctrl |
| 10431726 | Yaf2          | NM_024189    | 0.00031356   | 1.25671 | E15.5 * Wnt1 up vs E15.5 * Ctrl |
| 10583402 | Zfp317        | NM_172918    | 0.00421053   | 1.25651 | E15.5 * Wnt1 up vs E15.5 * Ctrl |
| 10603321 | ---           | ---          | 0.0147819    | 1.25643 | E15.5 * Wnt1 up vs E15.5 * Ctrl |
| 10346255 | Ormdl1        | NM_145517    | 0.00503886   | 1.25633 | E15.5 * Wnt1 up vs E15.5 * Ctrl |
| 10468533 | Gpam          | NM_008149    | 0.00153325   | 1.25611 | E15.5 * Wnt1 up vs E15.5 * Ctrl |
| 10349771 | EG638532      | XM_914588    | 0.0106337    | 1.25605 | E15.5 * Wnt1 up vs E15.5 * Ctrl |
| 10379262 | Nf1           | NM_010897    | 0.000283691  | 1.25597 | E15.5 * Wnt1 up vs E15.5 * Ctrl |
| 10375343 | Rnf145        | NM_028862    | 0.0034406    | 1.25594 | E15.5 * Wnt1 up vs E15.5 * Ctrl |
| 10481868 | Dnajb6        | NM_011847    | 0.000978071  | 1.25568 | E15.5 * Wnt1 up vs E15.5 * Ctrl |
| 10412011 | Kif2a         | NM_008442    | 3.53206e-008 | 1.25557 | E15.5 * Wnt1 up vs E15.5 * Ctrl |
| 10386705 | Rnf112        | NM_009548    | 0.003891     | 1.25536 | E15.5 * Wnt1 up vs E15.5 * Ctrl |
| 10568921 | Caly          | NM_026769    | 0.000851022  | 1.25534 | E15.5 * Wnt1 up vs E15.5 * Ctrl |
| 10596680 | Sema3b        | NM_001042779 | 0.0112162    | 1.25532 | E15.5 * Wnt1 up vs E15.5 * Ctrl |
| 10559500 | Ttyh1         | AK011493     | 0.00499702   | 1.25521 | E15.5 * Wnt1 up vs E15.5 * Ctrl |
| 10417183 | Pcca          | NM_144844    | 0.00378443   | 1.25511 | E15.5 * Wnt1 up vs E15.5 * Ctrl |
| 10516435 | Zmym4         | NM_001114399 | 0.00165079   | 1.255   | E15.5 * Wnt1 up vs E15.5 * Ctrl |
| 10443808 | Ndufv3        | NM_030087    | 0.00326298   | 1.25496 | E15.5 * Wnt1 up vs E15.5 * Ctrl |
| 10440918 | Tmem50b       | NM_030018    | 0.00406641   | 1.25474 | E15.5 * Wnt1 up vs E15.5 * Ctrl |
| 10388545 | Abr           | NM_198895    | 0.00664212   | 1.25448 | E15.5 * Wnt1 up vs E15.5 * Ctrl |
| 10559343 | Shank2        | NM_001113373 | 0.00521474   | 1.25427 | E15.5 * Wnt1 up vs E15.5 * Ctrl |
| 10467425 | Sorbs1        | NM_178362    | 0.00136038   | 1.2542  | E15.5 * Wnt1 up vs E15.5 * Ctrl |
| 10478077 | B230339M05Rik | NM_177658    | 0.000198863  | 1.25416 | E15.5 * Wnt1 up vs E15.5 * Ctrl |
| 10409265 | Auh           | NM_016709    | 0.0100499    | 1.25409 | E15.5 * Wnt1 up vs E15.5 * Ctrl |
| 10541446 | Cpamd8        | NM_008646    | 0.00336986   | 1.25408 | E15.5 * Wnt1 up vs E15.5 * Ctrl |
| 10534281 | Clip2         | NM_009990    | 0.0139875    | 1.25405 | E15.5 * Wnt1 up vs E15.5 * Ctrl |
| 10431711 | Slc2a13       | NM_001033633 | 0.0117335    | 1.2537  | E15.5 * Wnt1 up vs E15.5 * Ctrl |
| 10372600 | Cct2          | NM_007636    | 7.87016e-007 | 1.25365 | E15.5 * Wnt1 up vs E15.5 * Ctrl |
| 10436552 | Rbm11         | NM_198302    | 0.0129253    | 1.25343 | E15.5 * Wnt1 up vs E15.5 * Ctrl |
| 10461214 | Tmem223       | NM_025791    | 0.00290664   | 1.25336 | E15.5 * Wnt1 up vs E15.5 * Ctrl |
| 10515220 | Faah          | NM_010173    | 0.00464366   | 1.25323 | E15.5 * Wnt1 up vs E15.5 * Ctrl |
| 10537375 | Ubn2          | NM_177185    | 0.000760482  | 1.25323 | E15.5 * Wnt1 up vs E15.5 * Ctrl |
| 10565330 | Zfand6        | NM_022985    | 0.00839847   | 1.25322 | E15.5 * Wnt1 up vs E15.5 * Ctrl |
| 10559853 | Cln4-2        | NM_011334    | 0.000102516  | 1.25315 | E15.5 * Wnt1 up vs E15.5 * Ctrl |
| 10395976 | Dnajb6        | NM_011847    | 0.0011053    | 1.25314 | E15.5 * Wnt1 up vs E15.5 * Ctrl |
| 10375216 | Pank3         | NM_145962    | 0.00444062   | 1.25313 | E15.5 * Wnt1 up vs E15.5 * Ctrl |
| 10593605 | Cul5          | NM_027807    | 0.00167737   | 1.2531  | E15.5 * Wnt1 up vs E15.5 * Ctrl |
| 10435661 | Gpr156        | NM_153394    | 0.00321146   | 1.253   | E15.5 * Wnt1 up vs E15.5 * Ctrl |
| 10382393 | Dnaic2        | NM_001034878 | 0.000132332  | 1.25299 | E15.5 * Wnt1 up vs E15.5 * Ctrl |

|          |               |              |              |         |                                 |
|----------|---------------|--------------|--------------|---------|---------------------------------|
| 10546936 | Prrt3         | NM_172487    | 0.0100095    | 1.25282 | E15.5 * Wnt1 up vs E15.5 * Ctrl |
| 10481435 | Ccbl1         | NM_172404    | 0.00399255   | 1.25272 | E15.5 * Wnt1 up vs E15.5 * Ctrl |
| 10402096 | Ttc7b         | NM_001033213 | 0.00113924   | 1.25253 | E15.5 * Wnt1 up vs E15.5 * Ctrl |
| 10583392 | ---           | ---          | 0.00321918   | 1.25253 | E15.5 * Wnt1 up vs E15.5 * Ctrl |
| 10482336 | Lrp1b         | NM_053011    | 0.000292291  | 1.25251 | E15.5 * Wnt1 up vs E15.5 * Ctrl |
| 10493009 | Arhgef11      | NM_001003912 | 0.0124349    | 1.25234 | E15.5 * Wnt1 up vs E15.5 * Ctrl |
| 10452248 | Slc25a41      | NM_175333    | 0.00966361   | 1.25222 | E15.5 * Wnt1 up vs E15.5 * Ctrl |
| 10486754 | Hisppd2a      | NM_178795    | 0.00714652   | 1.25217 | E15.5 * Wnt1 up vs E15.5 * Ctrl |
| 10431612 | Rabl2a        | NM_026817    | 0.00502415   | 1.2521  | E15.5 * Wnt1 up vs E15.5 * Ctrl |
| 10407307 | Mocs2         | NM_013826    | 0.00798313   | 1.25188 | E15.5 * Wnt1 up vs E15.5 * Ctrl |
| 10568956 | Olfr60        | NM_146955    | 0.00118529   | 1.25188 | E15.5 * Wnt1 up vs E15.5 * Ctrl |
| 10454414 | Pik3c3        | NM_181414    | 0.000276732  | 1.2517  | E15.5 * Wnt1 up vs E15.5 * Ctrl |
| 10437677 | Prrm3         | NM_013638    | 0.00364193   | 1.25151 | E15.5 * Wnt1 up vs E15.5 * Ctrl |
| 10526229 | ENSMUSG00000  | ENSMUST00000 | 0.00466983   | 1.2513  | E15.5 * Wnt1 up vs E15.5 * Ctrl |
| 10595805 | Rasa2         | NM_053268    | 0.00410076   | 1.25128 | E15.5 * Wnt1 up vs E15.5 * Ctrl |
| 10356145 | Slc19a3       | NM_030556    | 0.0118012    | 1.25119 | E15.5 * Wnt1 up vs E15.5 * Ctrl |
| 10380830 | B230217C12Rik | NM_001080935 | 0.00579874   | 1.25114 | E15.5 * Wnt1 up vs E15.5 * Ctrl |
| 10502058 | BC002199      | NM_145964    | 3.51264e-005 | 1.25109 | E15.5 * Wnt1 up vs E15.5 * Ctrl |
| 10358177 | 5730559C18Rik | BC053100     | 0.0142071    | 1.25088 | E15.5 * Wnt1 up vs E15.5 * Ctrl |
| 10404264 | Prl           | NM_011164    | 0.0052976    | 1.2506  | E15.5 * Wnt1 up vs E15.5 * Ctrl |
| 10415262 | Wdr23         | NM_133734    | 0.000503046  | 1.25058 | E15.5 * Wnt1 up vs E15.5 * Ctrl |
| 10404904 | Rbm24         | NM_001081425 | 0.00425874   | 1.25057 | E15.5 * Wnt1 up vs E15.5 * Ctrl |
| 10532716 | 1700069L16Rik | ENSMUST00000 | 0.000819485  | 1.25048 | E15.5 * Wnt1 up vs E15.5 * Ctrl |
| 10477058 | Scrt2         | ENSMUST00000 | 8.52694e-005 | 1.25047 | E15.5 * Wnt1 up vs E15.5 * Ctrl |
| 10454809 | Matr3         | NM_010771    | 0.00114736   | 1.25042 | E15.5 * Wnt1 up vs E15.5 * Ctrl |
| 10575993 | 6430548M08Rik | BC027126     | 0.00682179   | 1.25041 | E15.5 * Wnt1 up vs E15.5 * Ctrl |
| 10413919 | Prrxl1        | NM_001001796 | 0.00824947   | 1.25016 | E15.5 * Wnt1 up vs E15.5 * Ctrl |
| 10353533 | Smad1         | NM_028534    | 0.000909887  | 1.25015 | E15.5 * Wnt1 up vs E15.5 * Ctrl |
| 10428157 | Rnf19a        | NM_013923    | 0.00222088   | 1.24996 | E15.5 * Wnt1 up vs E15.5 * Ctrl |
| 10379677 | Rasl10b       | NM_001013386 | 0.0144024    | 1.24996 | E15.5 * Wnt1 up vs E15.5 * Ctrl |
| 10558548 | Kndc1         | NM_177261    | 0.0111508    | 1.24989 | E15.5 * Wnt1 up vs E15.5 * Ctrl |
| 10456346 | Sec11c        | NM_025468    | 0.00912558   | 1.24982 | E15.5 * Wnt1 up vs E15.5 * Ctrl |
| 10457838 | Zfp397os      | NM_001080810 | 0.0140367    | 1.24968 | E15.5 * Wnt1 up vs E15.5 * Ctrl |
| 10590279 | Myrip         | NM_144557    | 0.00125223   | 1.2496  | E15.5 * Wnt1 up vs E15.5 * Ctrl |
| 10453114 | Dhx57         | NM_198942    | 0.000470839  | 1.24953 | E15.5 * Wnt1 up vs E15.5 * Ctrl |
| 10428176 | Snx31         | NM_025712    | 0.00449416   | 1.2495  | E15.5 * Wnt1 up vs E15.5 * Ctrl |
| 10538526 | Avl9          | NM_030235    | 0.00183616   | 1.24944 | E15.5 * Wnt1 up vs E15.5 * Ctrl |
| 10594289 | Glice         | NM_033320    | 0.00154045   | 1.24942 | E15.5 * Wnt1 up vs E15.5 * Ctrl |
| 10552708 | Kcnc3         | NM_008422    | 1.00012e-006 | 1.24931 | E15.5 * Wnt1 up vs E15.5 * Ctrl |
| 10504294 | Rusc2         | NM_001037709 | 0.00460948   | 1.24928 | E15.5 * Wnt1 up vs E15.5 * Ctrl |
| 10488575 | Psmf1         | NM_212446    | 0.00443894   | 1.24915 | E15.5 * Wnt1 up vs E15.5 * Ctrl |
| 10568997 | Sirt3         | NM_022433    | 0.00372301   | 1.24913 | E15.5 * Wnt1 up vs E15.5 * Ctrl |
| 10429944 | Scrt1         | NM_130893    | 0.000256543  | 1.24908 | E15.5 * Wnt1 up vs E15.5 * Ctrl |
| 10544756 | Hoxa3         | NM_010452    | 7.58403e-005 | 1.24906 | E15.5 * Wnt1 up vs E15.5 * Ctrl |
| 10373577 | Ormdl2        | NM_024180    | 0.0106683    | 1.24892 | E15.5 * Wnt1 up vs E15.5 * Ctrl |
| 10467230 | Ide           | NM_031156    | 0.00600274   | 1.24892 | E15.5 * Wnt1 up vs E15.5 * Ctrl |
| 10498827 | Fnip2         | ENSMUST00000 | 0.00199398   | 1.24878 | E15.5 * Wnt1 up vs E15.5 * Ctrl |
| 10400668 | Sdccag1       | NM_025441    | 0.00125808   | 1.24873 | E15.5 * Wnt1 up vs E15.5 * Ctrl |
| 10438530 | Cln2          | NM_009900    | 7.28919e-006 | 1.24848 | E15.5 * Wnt1 up vs E15.5 * Ctrl |
| 10399214 | Rab10         | NM_016676    | 0.000101013  | 1.24839 | E15.5 * Wnt1 up vs E15.5 * Ctrl |
| 10512384 | BC049635      | NM_177785    | 0.00167254   | 1.24828 | E15.5 * Wnt1 up vs E15.5 * Ctrl |
| 10434880 | Hrasls        | NM_013751    | 0.0138604    | 1.24825 | E15.5 * Wnt1 up vs E15.5 * Ctrl |
| 10451918 | Ubxn6         | NM_024432    | 0.000189245  | 1.24815 | E15.5 * Wnt1 up vs E15.5 * Ctrl |
| 10393866 | Sirt7         | NM_153056    | 0.00956484   | 1.24804 | E15.5 * Wnt1 up vs E15.5 * Ctrl |
| 10432378 | Lmbr1l        | NM_029098    | 0.00645067   | 1.24767 | E15.5 * Wnt1 up vs E15.5 * Ctrl |
| 10404941 | Aof1          | NM_172262    | 0.00845633   | 1.24762 | E15.5 * Wnt1 up vs E15.5 * Ctrl |
| 10424853 | Brp16         | NM_021555    | 0.00650022   | 1.24751 | E15.5 * Wnt1 up vs E15.5 * Ctrl |
| 10558740 | OTTMUSG00000  | XM_001480612 | 0.0105733    | 1.24746 | E15.5 * Wnt1 up vs E15.5 * Ctrl |
| 10348963 | Cntnap5b      | NM_172851    | 0.00639689   | 1.24716 | E15.5 * Wnt1 up vs E15.5 * Ctrl |
| 10435031 | Ubxn7         | NM_177633    | 0.000605554  | 1.24713 | E15.5 * Wnt1 up vs E15.5 * Ctrl |
| 10600688 | Map3k7ip3     | NM_025729    | 0.00594999   | 1.24703 | E15.5 * Wnt1 up vs E15.5 * Ctrl |
| 10453900 | Riok3         | NM_024182    | 0.00379327   | 1.24678 | E15.5 * Wnt1 up vs E15.5 * Ctrl |
| 10495385 | 4921515J06Rik | NM_025723    | 0.0052839    | 1.24671 | E15.5 * Wnt1 up vs E15.5 * Ctrl |
| 10446756 | Ypel5         | NM_027166    | 0.00395586   | 1.24652 | E15.5 * Wnt1 up vs E15.5 * Ctrl |
| 10346330 | Plcl1         | NM_001114663 | 0.00817169   | 1.24642 | E15.5 * Wnt1 up vs E15.5 * Ctrl |
| 10596545 | Rad54l2       | NM_030730    | 0.000227463  | 1.24624 | E15.5 * Wnt1 up vs E15.5 * Ctrl |

|          |               |              |              |         |                                 |
|----------|---------------|--------------|--------------|---------|---------------------------------|
| 10443876 | 677156        | NM_001100187 | 0.00809673   | 1.24612 | E15.5 * Wnt1 up vs E15.5 * Ctrl |
| 10410892 | Rasa1         | NM_145452    | 0.00112122   | 1.24578 | E15.5 * Wnt1 up vs E15.5 * Ctrl |
| 10382788 | Galr2         | NM_010254    | 0.000578162  | 1.24575 | E15.5 * Wnt1 up vs E15.5 * Ctrl |
| 10565620 | Rsf1          | NM_001081267 | 0.000415639  | 1.24553 | E15.5 * Wnt1 up vs E15.5 * Ctrl |
| 10459210 | 4933429F08Rik | NM_177828    | 0.0126608    | 1.2455  | E15.5 * Wnt1 up vs E15.5 * Ctrl |
| 10393944 | Rfng          | NM_009053    | 0.00136395   | 1.2455  | E15.5 * Wnt1 up vs E15.5 * Ctrl |
| 10348618 | Asb1          | NM_001039126 | 0.00165026   | 1.24545 | E15.5 * Wnt1 up vs E15.5 * Ctrl |
| 10535312 | Radil         | NM_178702    | 0.00191629   | 1.2454  | E15.5 * Wnt1 up vs E15.5 * Ctrl |
| 10465625 | Otub1         | NM_134150    | 0.00868323   | 1.24521 | E15.5 * Wnt1 up vs E15.5 * Ctrl |
| 10433940 | Mapk1         | NM_011949    | 0.000168425  | 1.24515 | E15.5 * Wnt1 up vs E15.5 * Ctrl |
| 10381032 | Casc3         | NM_138660    | 0.00478737   | 1.24515 | E15.5 * Wnt1 up vs E15.5 * Ctrl |
| 10441053 | ---           | ---          | 0.00285338   | 1.24512 | E15.5 * Wnt1 up vs E15.5 * Ctrl |
| 10368136 | EG237300      | NM_177706    | 0.00172965   | 1.24476 | E15.5 * Wnt1 up vs E15.5 * Ctrl |
| 10566723 | Lmo1          | NM_057173    | 0.00247611   | 1.24445 | E15.5 * Wnt1 up vs E15.5 * Ctrl |
| 10345457 | ---           | ---          | 0.00125279   | 1.24442 | E15.5 * Wnt1 up vs E15.5 * Ctrl |
| 10427369 | Pde1b         | NM_008800    | 0.0021035    | 1.24434 | E15.5 * Wnt1 up vs E15.5 * Ctrl |
| 10534912 | 6430598A04Rik | NM_175521    | 0.00330088   | 1.24408 | E15.5 * Wnt1 up vs E15.5 * Ctrl |
| 10378848 | Hsp90aa1      | NM_010480    | 1.04526e-005 | 1.24407 | E15.5 * Wnt1 up vs E15.5 * Ctrl |
| 10509014 | D4Wsu53e      | BC043057     | 0.00131201   | 1.24387 | E15.5 * Wnt1 up vs E15.5 * Ctrl |
| 10388716 | ENSMUSG00000  | ENSMUST00000 | 0.00628288   | 1.24385 | E15.5 * Wnt1 up vs E15.5 * Ctrl |
| 10477854 | Epb4.111      | NM_013510    | 0.00121819   | 1.24377 | E15.5 * Wnt1 up vs E15.5 * Ctrl |
| 10528723 | MIl3          | NM_001081383 | 0.000272822  | 1.24371 | E15.5 * Wnt1 up vs E15.5 * Ctrl |
| 10574096 | Ap3s1         | NM_009681    | 0.00676982   | 1.2437  | E15.5 * Wnt1 up vs E15.5 * Ctrl |
| 10374842 | Ccdc88a       | NM_176841    | 0.00188483   | 1.24353 | E15.5 * Wnt1 up vs E15.5 * Ctrl |
| 10560304 | Calm3         | NM_007590    | 0.00471294   | 1.24352 | E15.5 * Wnt1 up vs E15.5 * Ctrl |
| 10569222 | ENSMUSG00000  | AK016549     | 0.00963159   | 1.24347 | E15.5 * Wnt1 up vs E15.5 * Ctrl |
| 10408379 | Prl8a6        | NM_011167    | 0.000271515  | 1.24347 | E15.5 * Wnt1 up vs E15.5 * Ctrl |
| 10398695 | Mark3         | NM_021516    | 9.41334e-005 | 1.24346 | E15.5 * Wnt1 up vs E15.5 * Ctrl |
| 10516658 | Ccdc28b       | NM_025455    | 0.000346393  | 1.24345 | E15.5 * Wnt1 up vs E15.5 * Ctrl |
| 10466248 | Stx3          | NM_001025307 | 0.00573784   | 1.24342 | E15.5 * Wnt1 up vs E15.5 * Ctrl |
| 10398111 | Tcl1b4        | NM_013774    | 0.007639     | 1.24337 | E15.5 * Wnt1 up vs E15.5 * Ctrl |
| 10404827 | Nol7          | NM_023554    | 0.00411857   | 1.24329 | E15.5 * Wnt1 up vs E15.5 * Ctrl |
| 10498647 | B3galnt1      | NM_020026    | 0.000120912  | 1.24312 | E15.5 * Wnt1 up vs E15.5 * Ctrl |
| 10544248 | ---           | ---          | 0.00884087   | 1.24306 | E15.5 * Wnt1 up vs E15.5 * Ctrl |
| 10433433 | BC024814      | BC024814     | 0.000207884  | 1.24292 | E15.5 * Wnt1 up vs E15.5 * Ctrl |
| 10347018 | Pth2r         | NM_139270    | 0.0131824    | 1.24272 | E15.5 * Wnt1 up vs E15.5 * Ctrl |
| 10345913 | Nck2          | NM_010879    | 0.00235789   | 1.2427  | E15.5 * Wnt1 up vs E15.5 * Ctrl |
| 10406843 | Btf3          | NM_145455    | 0.0020914    | 1.24253 | E15.5 * Wnt1 up vs E15.5 * Ctrl |
| 10460621 | 1810058N15Rik | ENSMUST00000 | 0.00963346   | 1.24252 | E15.5 * Wnt1 up vs E15.5 * Ctrl |
| 10558872 | Tmem80        | NM_027797    | 0.00584966   | 1.24251 | E15.5 * Wnt1 up vs E15.5 * Ctrl |
| 10392936 | Nt5c          | NM_015807    | 0.000854959  | 1.2425  | E15.5 * Wnt1 up vs E15.5 * Ctrl |
| 10591763 | Zfp810        | NM_145612    | 0.00784989   | 1.24246 | E15.5 * Wnt1 up vs E15.5 * Ctrl |
| 10566846 | Dennd5a       | NM_021494    | 0.000106434  | 1.24237 | E15.5 * Wnt1 up vs E15.5 * Ctrl |
| 10369531 | Tspan15       | NM_197996    | 0.0139084    | 1.24226 | E15.5 * Wnt1 up vs E15.5 * Ctrl |
| 10399387 | Msgn1         | NM_019544    | 0.000805573  | 1.24193 | E15.5 * Wnt1 up vs E15.5 * Ctrl |
| 10566488 | Trim3         | NM_018880    | 0.00548883   | 1.24192 | E15.5 * Wnt1 up vs E15.5 * Ctrl |
| 10426650 | Tuba1c        | NM_009448    | 2.8078e-005  | 1.24191 | E15.5 * Wnt1 up vs E15.5 * Ctrl |
| 10375893 | Sar1b         | NM_025535    | 0.00027166   | 1.24172 | E15.5 * Wnt1 up vs E15.5 * Ctrl |
| 10601412 | Lpar4         | NM_175271    | 0.000771424  | 1.24167 | E15.5 * Wnt1 up vs E15.5 * Ctrl |
| 10413795 | Eaf1          | NM_028932    | 3.6456e-005  | 1.24157 | E15.5 * Wnt1 up vs E15.5 * Ctrl |
| 10392251 | Ddx5          | NM_007840    | 6.83043e-006 | 1.24155 | E15.5 * Wnt1 up vs E15.5 * Ctrl |
| 10400894 | Gpr135        | NM_181752    | 0.000759324  | 1.24151 | E15.5 * Wnt1 up vs E15.5 * Ctrl |
| 10529636 | Stk32b        | NM_022416    | 0.0122753    | 1.24146 | E15.5 * Wnt1 up vs E15.5 * Ctrl |
| 10493335 | 5830417110Rik | BC059914     | 0.0133157    | 1.24145 | E15.5 * Wnt1 up vs E15.5 * Ctrl |
| 10390381 | Npepps        | NM_008942    | 4.62191e-005 | 1.24135 | E15.5 * Wnt1 up vs E15.5 * Ctrl |
| 10428310 | Azin1         | NM_001102458 | 0.00304418   | 1.2412  | E15.5 * Wnt1 up vs E15.5 * Ctrl |
| 10417895 | Ppp3cb        | NM_008914    | 0.00022242   | 1.24119 | E15.5 * Wnt1 up vs E15.5 * Ctrl |
| 10581111 | Nae1          | NM_144931    | 0.000609719  | 1.24117 | E15.5 * Wnt1 up vs E15.5 * Ctrl |
| 10508392 | Rnf19b        | ENSMUST00000 | 0.00926201   | 1.24109 | E15.5 * Wnt1 up vs E15.5 * Ctrl |
| 10569306 | Krtap5-1      | NM_015808    | 0.00244398   | 1.24087 | E15.5 * Wnt1 up vs E15.5 * Ctrl |
| 10597258 | Tmie          | NM_146260    | 0.0049815    | 1.24052 | E15.5 * Wnt1 up vs E15.5 * Ctrl |
| 10349793 | Dstyky        | NM_172516    | 0.00353481   | 1.24051 | E15.5 * Wnt1 up vs E15.5 * Ctrl |
| 10389882 | 3300001P08Rik | NM_026313    | 1.00677e-006 | 1.24032 | E15.5 * Wnt1 up vs E15.5 * Ctrl |
| 10569168 | Slc25a22      | NM_026646    | 0.00350885   | 1.24011 | E15.5 * Wnt1 up vs E15.5 * Ctrl |
| 10402615 | Hsp90aa1      | NM_010480    | 8.13883e-006 | 1.23978 | E15.5 * Wnt1 up vs E15.5 * Ctrl |
| 10584506 | Olfir967      | NM_001011826 | 0.00835891   | 1.23972 | E15.5 * Wnt1 up vs E15.5 * Ctrl |

|          |               |              |              |         |                                 |
|----------|---------------|--------------|--------------|---------|---------------------------------|
| 10450212 | Egfl8         | NM_152922    | 0.00078576   | 1.23962 | E15.5 * Wnt1 up vs E15.5 * Ctrl |
| 10597427 | Trim71        | NM_001042503 | 0.0118       | 1.23936 | E15.5 * Wnt1 up vs E15.5 * Ctrl |
| 10424833 | Maf1          | NM_026859    | 0.0121499    | 1.23909 | E15.5 * Wnt1 up vs E15.5 * Ctrl |
| 10455542 | Ap3s1         | NM_009681    | 0.00749426   | 1.23908 | E15.5 * Wnt1 up vs E15.5 * Ctrl |
| 10365830 | ---           | ---          | 0.000988634  | 1.239   | E15.5 * Wnt1 up vs E15.5 * Ctrl |
| 10490016 | Sall4         | NM_175303    | 0.00591797   | 1.23897 | E15.5 * Wnt1 up vs E15.5 * Ctrl |
| 10577385 | EG654453      | NM_001039119 | 0.000303943  | 1.2389  | E15.5 * Wnt1 up vs E15.5 * Ctrl |
| 10358849 | Dhx9          | NM_007842    | 3.14453e-005 | 1.23864 | E15.5 * Wnt1 up vs E15.5 * Ctrl |
| 10388625 | Efcab5        | NM_176965    | 0.00362989   | 1.23863 | E15.5 * Wnt1 up vs E15.5 * Ctrl |
| 10495854 | Prss12        | NM_008939    | 0.00507634   | 1.23856 | E15.5 * Wnt1 up vs E15.5 * Ctrl |
| 10555089 | Rsf1          | NM_001081267 | 0.000939997  | 1.23851 | E15.5 * Wnt1 up vs E15.5 * Ctrl |
| 10399376 | 9930038B18Rik | ENSMUST00000 | 0.00334787   | 1.2385  | E15.5 * Wnt1 up vs E15.5 * Ctrl |
| 10350039 | Rabif         | NM_145510    | 0.00314179   | 1.23806 | E15.5 * Wnt1 up vs E15.5 * Ctrl |
| 10472313 | Tbr1          | NM_009322    | 2.11009e-005 | 1.23777 | E15.5 * Wnt1 up vs E15.5 * Ctrl |
| 10523526 | ENSMUSG00000  | ENSMUST00000 | 0.00343138   | 1.23764 | E15.5 * Wnt1 up vs E15.5 * Ctrl |
| 10407222 | Dhx29         | NM_172594    | 0.00523316   | 1.23746 | E15.5 * Wnt1 up vs E15.5 * Ctrl |
| 10505461 | Atp6v1g1      | NM_024173    | 0.000192824  | 1.23736 | E15.5 * Wnt1 up vs E15.5 * Ctrl |
| 10457038 | ENSMUSG00000  | ENSMUST00000 | 0.00053941   | 1.23731 | E15.5 * Wnt1 up vs E15.5 * Ctrl |
| 10474477 | OTTMUSG00000  | XR_034254    | 0.0107462    | 1.23723 | E15.5 * Wnt1 up vs E15.5 * Ctrl |
| 10389326 | Pigw          | NM_027388    | 0.0102954    | 1.23719 | E15.5 * Wnt1 up vs E15.5 * Ctrl |
| 10480121 | 2310047O13Rik | NM_024185    | 0.000750485  | 1.23713 | E15.5 * Wnt1 up vs E15.5 * Ctrl |
| 10576657 | ---           | ---          | 0.0118337    | 1.23708 | E15.5 * Wnt1 up vs E15.5 * Ctrl |
| 10578149 | Leprotl1      | NM_026609    | 8.48612e-005 | 1.23673 | E15.5 * Wnt1 up vs E15.5 * Ctrl |
| 10498302 | Gm410         | NM_001033349 | 0.00598517   | 1.23667 | E15.5 * Wnt1 up vs E15.5 * Ctrl |
| 10546829 | Oxtr          | NM_001081147 | 0.0138394    | 1.23665 | E15.5 * Wnt1 up vs E15.5 * Ctrl |
| 10534075 | Psph          | NM_133900    | 0.00359774   | 1.2365  | E15.5 * Wnt1 up vs E15.5 * Ctrl |
| 10467650 | Frat2         | NM_177603    | 0.00764897   | 1.2365  | E15.5 * Wnt1 up vs E15.5 * Ctrl |
| 10504916 | ---           | ---          | 0.00672016   | 1.23643 | E15.5 * Wnt1 up vs E15.5 * Ctrl |
| 10580309 | 1500041N16Rik | NM_026399    | 0.00175516   | 1.23635 | E15.5 * Wnt1 up vs E15.5 * Ctrl |
| 10388352 | Sgsm2         | NM_197943    | 0.000789956  | 1.23633 | E15.5 * Wnt1 up vs E15.5 * Ctrl |
| 10432488 | Bcdin3d       | NM_029236    | 0.00544662   | 1.23619 | E15.5 * Wnt1 up vs E15.5 * Ctrl |
| 10544338 | Prss3         | NM_011645    | 0.00138795   | 1.23611 | E15.5 * Wnt1 up vs E15.5 * Ctrl |
| 10497086 | 1810013D15Rik | ENSMUST00000 | 0.00989291   | 1.23602 | E15.5 * Wnt1 up vs E15.5 * Ctrl |
| 10494655 | Zfp697        | NM_172863    | 0.00163176   | 1.23575 | E15.5 * Wnt1 up vs E15.5 * Ctrl |
| 10439917 | Zpld1         | NM_178720    | 0.00286653   | 1.23568 | E15.5 * Wnt1 up vs E15.5 * Ctrl |
| 10497399 | Pde7a         | NM_001122759 | 0.000908492  | 1.23565 | E15.5 * Wnt1 up vs E15.5 * Ctrl |
| 10362149 | Taar2         | NM_001007266 | 3.30193e-005 | 1.23558 | E15.5 * Wnt1 up vs E15.5 * Ctrl |
| 10460202 | Suv420h1      | NM_144871    | 2.01786e-005 | 1.23543 | E15.5 * Wnt1 up vs E15.5 * Ctrl |
| 10545208 | Gm189         | ENSMUST00000 | 0.00226005   | 1.23536 | E15.5 * Wnt1 up vs E15.5 * Ctrl |
| 10524588 | Ankrd13a      | NM_026718    | 0.0134542    | 1.2353  | E15.5 * Wnt1 up vs E15.5 * Ctrl |
| 10589870 | ---           | ---          | 0.013383     | 1.23526 | E15.5 * Wnt1 up vs E15.5 * Ctrl |
| 10502135 | Rrh           | NM_009102    | 0.00216027   | 1.23525 | E15.5 * Wnt1 up vs E15.5 * Ctrl |
| 10540191 | Nr2c2         | NM_011630    | 8.30179e-005 | 1.23518 | E15.5 * Wnt1 up vs E15.5 * Ctrl |
| 10599962 | Mamld1        | NM_001081354 | 0.00463541   | 1.23513 | E15.5 * Wnt1 up vs E15.5 * Ctrl |
| 10485828 | Slc12a6       | NM_133648    | 0.00564056   | 1.23465 | E15.5 * Wnt1 up vs E15.5 * Ctrl |
| 10348682 | Capn10        | NM_011796    | 0.00373029   | 1.23457 | E15.5 * Wnt1 up vs E15.5 * Ctrl |
| 10378065 | Med31         | NM_026068    | 0.0139703    | 1.23448 | E15.5 * Wnt1 up vs E15.5 * Ctrl |
| 10572332 | Sfrs14        | NM_172755    | 0.000102004  | 1.23447 | E15.5 * Wnt1 up vs E15.5 * Ctrl |
| 10473217 | ---           | ---          | 0.00113947   | 1.2344  | E15.5 * Wnt1 up vs E15.5 * Ctrl |
| 10503695 | Bach2         | NM_007521    | 0.00733287   | 1.23437 | E15.5 * Wnt1 up vs E15.5 * Ctrl |
| 10486722 | Trp53bp1      | NM_013735    | 0.00093044   | 1.23408 | E15.5 * Wnt1 up vs E15.5 * Ctrl |
| 10460468 | Ctsf          | NM_019861    | 0.014336     | 1.23363 | E15.5 * Wnt1 up vs E15.5 * Ctrl |
| 10496338 | Ppp3ca        | NM_008913    | 0.000690972  | 1.23356 | E15.5 * Wnt1 up vs E15.5 * Ctrl |
| 10604230 | Ap3s1         | NM_009681    | 0.00919538   | 1.23351 | E15.5 * Wnt1 up vs E15.5 * Ctrl |
| 10477673 | Myh7b         | NM_001085378 | 0.00239148   | 1.23329 | E15.5 * Wnt1 up vs E15.5 * Ctrl |
| 10367708 | Pcmt1         | NM_008786    | 0.000411625  | 1.2331  | E15.5 * Wnt1 up vs E15.5 * Ctrl |
| 10424746 | Zfp623        | NM_030199    | 0.0075536    | 1.23301 | E15.5 * Wnt1 up vs E15.5 * Ctrl |
| 10422912 | 2410089E03Rik | BC058107     | 1.44632e-006 | 1.2328  | E15.5 * Wnt1 up vs E15.5 * Ctrl |
| 10407543 | Gtpbp4        | NM_027000    | 0.000215582  | 1.23277 | E15.5 * Wnt1 up vs E15.5 * Ctrl |
| 10433717 | ---           | ---          | 0.00281544   | 1.23232 | E15.5 * Wnt1 up vs E15.5 * Ctrl |
| 10424660 | 4933427E11Rik | ENSMUST00000 | 0.00655611   | 1.23229 | E15.5 * Wnt1 up vs E15.5 * Ctrl |
| 10471294 | Ppapdc3       | NM_145521    | 0.011029     | 1.23196 | E15.5 * Wnt1 up vs E15.5 * Ctrl |
| 10354404 | Dnajb6        | NM_001037940 | 0.00216271   | 1.23168 | E15.5 * Wnt1 up vs E15.5 * Ctrl |
| 10361748 | Fbxo30        | NM_027968    | 0.0062189    | 1.23165 | E15.5 * Wnt1 up vs E15.5 * Ctrl |
| 10403756 | 1600012F09Rik | NM_025904    | 0.00291128   | 1.23161 | E15.5 * Wnt1 up vs E15.5 * Ctrl |
| 10407916 | 1600012F09Rik | NM_025904    | 0.00291128   | 1.23161 | E15.5 * Wnt1 up vs E15.5 * Ctrl |

|                        |              |              |         |                                 |
|------------------------|--------------|--------------|---------|---------------------------------|
| 10586458 Csnk1g1       | NM_173185    | 0.00020748   | 1.23138 | E15.5 * Wnt1 up vs E15.5 * Ctrl |
| 10498515 Vmn2r-ps11    | NR_003962    | 0.013454     | 1.23134 | E15.5 * Wnt1 up vs E15.5 * Ctrl |
| 10452854 Srd5a2        | NM_053188    | 0.00530051   | 1.2313  | E15.5 * Wnt1 up vs E15.5 * Ctrl |
| 10482109 Rbm18         | NR_027515    | 0.00234619   | 1.23085 | E15.5 * Wnt1 up vs E15.5 * Ctrl |
| 10453575 Cul2          | NM_029402    | 0.00681296   | 1.2308  | E15.5 * Wnt1 up vs E15.5 * Ctrl |
| 10469239               | ---          | 0.0106197    | 1.23074 | E15.5 * Wnt1 up vs E15.5 * Ctrl |
| 10586357 Cilp          | NM_173385    | 0.00620019   | 1.23053 | E15.5 * Wnt1 up vs E15.5 * Ctrl |
| 10551770 Zfp30         | NM_013705    | 0.00503396   | 1.2305  | E15.5 * Wnt1 up vs E15.5 * Ctrl |
| 10568260 Zfp629        | NM_177226    | 0.00174575   | 1.23048 | E15.5 * Wnt1 up vs E15.5 * Ctrl |
| 10442458 Gbl           | NM_019988    | 0.00134841   | 1.2304  | E15.5 * Wnt1 up vs E15.5 * Ctrl |
| 10466735 Gm967         | NM_001114174 | 0.00897508   | 1.23034 | E15.5 * Wnt1 up vs E15.5 * Ctrl |
| 10485681 Fshb          | NM_008045    | 0.00309572   | 1.23016 | E15.5 * Wnt1 up vs E15.5 * Ctrl |
| 10537742 Clcn1         | NM_013491    | 0.00459498   | 1.23004 | E15.5 * Wnt1 up vs E15.5 * Ctrl |
| 10424102 EG665097      | ENSMUST00000 | 0.0146578    | 1.23002 | E15.5 * Wnt1 up vs E15.5 * Ctrl |
| 10488678 Dusp15        | NM_001159376 | 0.00557591   | 1.23002 | E15.5 * Wnt1 up vs E15.5 * Ctrl |
| 10428068 Tspyl5        | NM_001085421 | 0.0103202    | 1.22989 | E15.5 * Wnt1 up vs E15.5 * Ctrl |
| 10541214 B4galnt3      | NM_198884    | 0.0128576    | 1.22982 | E15.5 * Wnt1 up vs E15.5 * Ctrl |
| 10491331 Pik3ca        | NM_008839    | 0.00127928   | 1.22975 | E15.5 * Wnt1 up vs E15.5 * Ctrl |
| 10579144 9130404D08Rik | NM_028993    | 0.00248022   | 1.22953 | E15.5 * Wnt1 up vs E15.5 * Ctrl |
| 10596880 Bsn           | NM_007567    | 8.67274e-005 | 1.22951 | E15.5 * Wnt1 up vs E15.5 * Ctrl |
| 10550022 Psip1         | NM_133948    | 0.000148154  | 1.22937 | E15.5 * Wnt1 up vs E15.5 * Ctrl |
| 10545881 Cml2          | NM_053096    | 0.00732694   | 1.22918 | E15.5 * Wnt1 up vs E15.5 * Ctrl |
| 10589511 Scap          | NM_001001144 | 0.00608484   | 1.22897 | E15.5 * Wnt1 up vs E15.5 * Ctrl |
| 10562000 Psenen        | NM_025498    | 0.00106916   | 1.22871 | E15.5 * Wnt1 up vs E15.5 * Ctrl |
| 10468037               | ---          | 0.000596086  | 1.22867 | E15.5 * Wnt1 up vs E15.5 * Ctrl |
| 10589407 Spink8        | NM_183136    | 0.00838542   | 1.22865 | E15.5 * Wnt1 up vs E15.5 * Ctrl |
| 10577866 Ash2l         | NM_011791    | 3.00635e-007 | 1.22853 | E15.5 * Wnt1 up vs E15.5 * Ctrl |
| 10504148 4933409K07Rik | BC059060     | 0.00879946   | 1.22853 | E15.5 * Wnt1 up vs E15.5 * Ctrl |
| 10430920 Tcf20         | NM_001114140 | 0.000682862  | 1.22852 | E15.5 * Wnt1 up vs E15.5 * Ctrl |
| 10561831 Zfp566        | NM_152814    | 0.00445782   | 1.22843 | E15.5 * Wnt1 up vs E15.5 * Ctrl |
| 10369783 Zfp365        | NM_178679    | 0.00674694   | 1.22829 | E15.5 * Wnt1 up vs E15.5 * Ctrl |
| 10512125 Psenen        | NM_025498    | 0.00112143   | 1.22806 | E15.5 * Wnt1 up vs E15.5 * Ctrl |
| 10463632 Tmem180       | NM_029186    | 0.0019882    | 1.22804 | E15.5 * Wnt1 up vs E15.5 * Ctrl |
| 10455294 Kctd16        | ENSMUST00000 | 0.0147484    | 1.22801 | E15.5 * Wnt1 up vs E15.5 * Ctrl |
| 10539606 Cct7          | NM_007638    | 0.000676889  | 1.22798 | E15.5 * Wnt1 up vs E15.5 * Ctrl |
| 10440731 Krtap11-1     | NM_001113406 | 0.00409776   | 1.2278  | E15.5 * Wnt1 up vs E15.5 * Ctrl |
| 10559590 Ptprr         | NM_207270    | 0.00805066   | 1.22767 | E15.5 * Wnt1 up vs E15.5 * Ctrl |
| 10545379 Usp39         | NM_138592    | 0.00100964   | 1.22761 | E15.5 * Wnt1 up vs E15.5 * Ctrl |
| 10380087 Mtmr4         | NM_133215    | 6.10332e-005 | 1.2272  | E15.5 * Wnt1 up vs E15.5 * Ctrl |
| 10497090 Ankrd13c      | NM_001013806 | 0.00147726   | 1.22719 | E15.5 * Wnt1 up vs E15.5 * Ctrl |
| 10401172 Vti1b         | NM_016800    | 0.000163311  | 1.22715 | E15.5 * Wnt1 up vs E15.5 * Ctrl |
| 10385343 Ttc1          | NM_133795    | 0.000587826  | 1.22714 | E15.5 * Wnt1 up vs E15.5 * Ctrl |
| 10431266 Cerkl         | NM_145475    | 0.00212781   | 1.22711 | E15.5 * Wnt1 up vs E15.5 * Ctrl |
| 10375553 Olfr1389      | NM_147066    | 0.00277397   | 1.22693 | E15.5 * Wnt1 up vs E15.5 * Ctrl |
| 10578539 Slc25a4       | NM_007450    | 1.39903e-005 | 1.22663 | E15.5 * Wnt1 up vs E15.5 * Ctrl |
| 10570278               | ---          | 0.0101887    | 1.22658 | E15.5 * Wnt1 up vs E15.5 * Ctrl |
| 10578262               | ---          | 4.15948e-005 | 1.22657 | E15.5 * Wnt1 up vs E15.5 * Ctrl |
| 10403455 Dip2c         | NM_001081426 | 0.00720486   | 1.22624 | E15.5 * Wnt1 up vs E15.5 * Ctrl |
| 10350594 Ivns1abp      | NM_054102    | 3.79839e-005 | 1.22614 | E15.5 * Wnt1 up vs E15.5 * Ctrl |
| 10522873 EG654494      | NR_003652    | 0.0108682    | 1.22605 | E15.5 * Wnt1 up vs E15.5 * Ctrl |
| 10449873 Wiz           | NM_212438    | 0.000499097  | 1.22604 | E15.5 * Wnt1 up vs E15.5 * Ctrl |
| 10497167               | ---          | 0.0117029    | 1.22603 | E15.5 * Wnt1 up vs E15.5 * Ctrl |
| 10531796 Wdfy3         | NM_172882    | 0.00564932   | 1.22599 | E15.5 * Wnt1 up vs E15.5 * Ctrl |
| 10445407 Tcte1         | NM_013688    | 0.00349182   | 1.22594 | E15.5 * Wnt1 up vs E15.5 * Ctrl |
| 10571198 Gm1698        | ENSMUST00000 | 0.00517459   | 1.22593 | E15.5 * Wnt1 up vs E15.5 * Ctrl |
| 10364222 Ftcd          | NM_080845    | 0.00964925   | 1.22584 | E15.5 * Wnt1 up vs E15.5 * Ctrl |
| 10388684 Taok1         | NM_144825    | 0.00476572   | 1.2258  | E15.5 * Wnt1 up vs E15.5 * Ctrl |
| 10543173 Vwde          | NM_001013757 | 0.00448734   | 1.22572 | E15.5 * Wnt1 up vs E15.5 * Ctrl |
| 10552689 Fam71e1       | NM_028169    | 0.00559025   | 1.2257  | E15.5 * Wnt1 up vs E15.5 * Ctrl |
| 10409645 Ubqln1        | NM_152234    | 6.35667e-005 | 1.22553 | E15.5 * Wnt1 up vs E15.5 * Ctrl |
| 10550605 Eml2          | BC055476     | 0.00205837   | 1.22543 | E15.5 * Wnt1 up vs E15.5 * Ctrl |
| 10449631 Btbd9         | NM_027060    | 0.00662328   | 1.22539 | E15.5 * Wnt1 up vs E15.5 * Ctrl |
| 10489368 Fitm2         | NM_173397    | 0.00473197   | 1.22538 | E15.5 * Wnt1 up vs E15.5 * Ctrl |
| 10478698 Eya2          | NM_010165    | 3.28766e-005 | 1.22536 | E15.5 * Wnt1 up vs E15.5 * Ctrl |
| 10578973 Npy5r         | NM_016708    | 0.00478244   | 1.22536 | E15.5 * Wnt1 up vs E15.5 * Ctrl |
| 10472047 Tas2r134      | NM_199158    | 0.014715     | 1.22533 | E15.5 * Wnt1 up vs E15.5 * Ctrl |

|          |               |              |              |         |                                 |
|----------|---------------|--------------|--------------|---------|---------------------------------|
| 10470322 | Surf2         | NM_013678    | 0.00132035   | 1.22532 | E15.5 * Wnt1 up vs E15.5 * Ctrl |
| 10419354 | Map1lc3b      | NM_026160    | 0.00773572   | 1.22486 | E15.5 * Wnt1 up vs E15.5 * Ctrl |
| 10458709 | Gm94          | NM_001033280 | 0.0111681    | 1.22472 | E15.5 * Wnt1 up vs E15.5 * Ctrl |
| 10441740 | Agpat4        | NM_026644    | 0.000929535  | 1.22467 | E15.5 * Wnt1 up vs E15.5 * Ctrl |
| 10518494 | Ptchd2        | NM_001083342 | 0.00175207   | 1.22441 | E15.5 * Wnt1 up vs E15.5 * Ctrl |
| 10363915 | LOC432471     | AK138135     | 0.00938854   | 1.22436 | E15.5 * Wnt1 up vs E15.5 * Ctrl |
| 10355278 | Erbp4         | NM_010154    | 0.0131526    | 1.22425 | E15.5 * Wnt1 up vs E15.5 * Ctrl |
| 10394926 | ---           | ---          | 0.003245     | 1.22415 | E15.5 * Wnt1 up vs E15.5 * Ctrl |
| 10492890 | Lrba          | NM_030695    | 0.00330694   | 1.22414 | E15.5 * Wnt1 up vs E15.5 * Ctrl |
| 10555925 | Cnga4         | NM_001033317 | 0.0128082    | 1.22398 | E15.5 * Wnt1 up vs E15.5 * Ctrl |
| 10487382 | Fahd2a        | NM_029629    | 0.0008215    | 1.22387 | E15.5 * Wnt1 up vs E15.5 * Ctrl |
| 10345141 | Lmbrd1        | NM_026719    | 0.00186165   | 1.22381 | E15.5 * Wnt1 up vs E15.5 * Ctrl |
| 10405842 | 4932441B19Rik | NM_001083890 | 0.00554499   | 1.22342 | E15.5 * Wnt1 up vs E15.5 * Ctrl |
| 10381115 | Eif1          | NM_011508    | 0.000305739  | 1.22326 | E15.5 * Wnt1 up vs E15.5 * Ctrl |
| 10504178 | 4933409K07Rik | BC059060     | 0.00549612   | 1.22323 | E15.5 * Wnt1 up vs E15.5 * Ctrl |
| 10409053 | Zfp169        | NM_026450    | 0.00629089   | 1.22323 | E15.5 * Wnt1 up vs E15.5 * Ctrl |
| 10515983 | Dem1          | NM_028457    | 0.00040598   | 1.22304 | E15.5 * Wnt1 up vs E15.5 * Ctrl |
| 10586347 | Parp16        | NM_177460    | 0.0139495    | 1.22291 | E15.5 * Wnt1 up vs E15.5 * Ctrl |
| 10494005 | ENSMUSG0000C  | NM_001146107 | 0.00944327   | 1.22277 | E15.5 * Wnt1 up vs E15.5 * Ctrl |
| 10499969 | ENSMUSG0000C  | NM_001146107 | 0.00944327   | 1.22277 | E15.5 * Wnt1 up vs E15.5 * Ctrl |
| 10499979 | ENSMUSG0000C  | NM_001146107 | 0.00944327   | 1.22277 | E15.5 * Wnt1 up vs E15.5 * Ctrl |
| 10418275 | Ccdc66        | NM_177111    | 0.0112549    | 1.22274 | E15.5 * Wnt1 up vs E15.5 * Ctrl |
| 10362886 | Bend3         | NM_199028    | 0.0108894    | 1.22273 | E15.5 * Wnt1 up vs E15.5 * Ctrl |
| 10393404 | ---           | ---          | 0.0126286    | 1.22257 | E15.5 * Wnt1 up vs E15.5 * Ctrl |
| 10578399 | ---           | ---          | 0.00948211   | 1.22256 | E15.5 * Wnt1 up vs E15.5 * Ctrl |
| 10472942 | ENSMUSG0000C  | ENSMUST00000 | 0.0024065    | 1.22247 | E15.5 * Wnt1 up vs E15.5 * Ctrl |
| 10569719 | A430078G23Rik | NM_001033378 | 0.00718006   | 1.2224  | E15.5 * Wnt1 up vs E15.5 * Ctrl |
| 10463515 | Hps6          | NM_176785    | 0.00621119   | 1.22223 | E15.5 * Wnt1 up vs E15.5 * Ctrl |
| 10370025 | Smrcb1        | NM_011418    | 0.0019564    | 1.2221  | E15.5 * Wnt1 up vs E15.5 * Ctrl |
| 10600947 | Tmem28        | NM_001081283 | 0.00138441   | 1.222   | E15.5 * Wnt1 up vs E15.5 * Ctrl |
| 10352396 | Trp53bp2      | NM_173378    | 0.000669971  | 1.22191 | E15.5 * Wnt1 up vs E15.5 * Ctrl |
| 10587780 | Tuba1b        | NM_011654    | 0.000139373  | 1.22187 | E15.5 * Wnt1 up vs E15.5 * Ctrl |
| 10539653 | Tprkb         | NM_176842    | 0.0147317    | 1.22185 | E15.5 * Wnt1 up vs E15.5 * Ctrl |
| 10457382 | Gjd4          | NM_153086    | 0.00754277   | 1.22161 | E15.5 * Wnt1 up vs E15.5 * Ctrl |
| 10498002 | 1700018B24Rik | NR_003617    | 0.00541123   | 1.22157 | E15.5 * Wnt1 up vs E15.5 * Ctrl |
| 10415714 | Fam123a       | NM_028113    | 0.0098967    | 1.22135 | E15.5 * Wnt1 up vs E15.5 * Ctrl |
| 10397460 | EG627607      | ENSMUST00000 | 0.00136585   | 1.22127 | E15.5 * Wnt1 up vs E15.5 * Ctrl |
| 10361869 | Nhs1          | NM_173390    | 0.00102144   | 1.2212  | E15.5 * Wnt1 up vs E15.5 * Ctrl |
| 10474698 | ---           | ---          | 0.00091704   | 1.22095 | E15.5 * Wnt1 up vs E15.5 * Ctrl |
| 10566591 | Olfr695       | NM_146598    | 0.0130449    | 1.22085 | E15.5 * Wnt1 up vs E15.5 * Ctrl |
| 10490826 | Zbtb10        | ENSMUST00000 | 0.00769769   | 1.22084 | E15.5 * Wnt1 up vs E15.5 * Ctrl |
| 10510305 | Frap1         | NM_020009    | 0.00605573   | 1.22072 | E15.5 * Wnt1 up vs E15.5 * Ctrl |
| 10348032 | Armc9         | NM_030184    | 0.0107015    | 1.22067 | E15.5 * Wnt1 up vs E15.5 * Ctrl |
| 10593867 | Lingo1        | NM_181074    | 0.00862328   | 1.22065 | E15.5 * Wnt1 up vs E15.5 * Ctrl |
| 10413502 | Actr8         | NM_027493    | 0.00677983   | 1.22061 | E15.5 * Wnt1 up vs E15.5 * Ctrl |
| 10591228 | Zfp26         | NM_011753    | 3.74415e-005 | 1.22053 | E15.5 * Wnt1 up vs E15.5 * Ctrl |
| 10578872 | ---           | ---          | 0.00627732   | 1.22047 | E15.5 * Wnt1 up vs E15.5 * Ctrl |
| 10428827 | Tmem65        | NM_175212    | 0.00605242   | 1.22044 | E15.5 * Wnt1 up vs E15.5 * Ctrl |
| 10578757 | Fbxo8         | NM_015791    | 0.00275048   | 1.22038 | E15.5 * Wnt1 up vs E15.5 * Ctrl |
| 10420320 | Cenpj         | NM_001014996 | 0.0146162    | 1.22018 | E15.5 * Wnt1 up vs E15.5 * Ctrl |
| 10572514 | A230052G05Rik | ENSMUST00000 | 0.0100678    | 1.21998 | E15.5 * Wnt1 up vs E15.5 * Ctrl |
| 10554463 | Hddc3         | NM_026812    | 0.00451698   | 1.21998 | E15.5 * Wnt1 up vs E15.5 * Ctrl |
| 10493612 | 4933434E20Rik | NM_025762    | 0.0104906    | 1.21972 | E15.5 * Wnt1 up vs E15.5 * Ctrl |
| 10579089 | D330038O06Rik | NM_177899    | 0.00482428   | 1.21968 | E15.5 * Wnt1 up vs E15.5 * Ctrl |
| 10598422 | Gripap1       | NM_207670    | 0.00484395   | 1.21965 | E15.5 * Wnt1 up vs E15.5 * Ctrl |
| 10555260 | Olfr521       | NM_146356    | 0.00988254   | 1.21958 | E15.5 * Wnt1 up vs E15.5 * Ctrl |
| 10436493 | ---           | ---          | 0.00835114   | 1.21957 | E15.5 * Wnt1 up vs E15.5 * Ctrl |
| 10573549 | Fbxw9         | NM_026791    | 0.00569537   | 1.21927 | E15.5 * Wnt1 up vs E15.5 * Ctrl |
| 10400326 | Eapp          | NM_025456    | 0.00572812   | 1.21925 | E15.5 * Wnt1 up vs E15.5 * Ctrl |
| 10358537 | Hmcn1         | NM_001024720 | 0.0086511    | 1.21923 | E15.5 * Wnt1 up vs E15.5 * Ctrl |
| 10473517 | ---           | ---          | 0.00790856   | 1.2192  | E15.5 * Wnt1 up vs E15.5 * Ctrl |
| 10545425 | Sh2d6         | BC100525     | 0.00577408   | 1.21885 | E15.5 * Wnt1 up vs E15.5 * Ctrl |
| 10516466 | Zmym1         | NM_026670    | 0.000301566  | 1.21867 | E15.5 * Wnt1 up vs E15.5 * Ctrl |
| 10537494 | Ssbp1         | NM_028358    | 0.0101302    | 1.2186  | E15.5 * Wnt1 up vs E15.5 * Ctrl |
| 10569539 | Mrgprg        | NM_203492    | 0.00150915   | 1.21853 | E15.5 * Wnt1 up vs E15.5 * Ctrl |
| 10558134 | Plekha1       | NM_133942    | 0.00536131   | 1.21851 | E15.5 * Wnt1 up vs E15.5 * Ctrl |

|          |               |              |              |         |                                 |
|----------|---------------|--------------|--------------|---------|---------------------------------|
| 10393628 | Tbc1d16       | NM_172443    | 0.00790124   | 1.21847 | E15.5 * Wnt1 up vs E15.5 * Ctrl |
| 10348666 | Dusp28        | NM_175118    | 0.00553377   | 1.21845 | E15.5 * Wnt1 up vs E15.5 * Ctrl |
| 10384936 | Acyp2         | NM_029344    | 0.00543197   | 1.21837 | E15.5 * Wnt1 up vs E15.5 * Ctrl |
| 10389283 | Lhx1          | NM_008498    | 0.00754491   | 1.2183  | E15.5 * Wnt1 up vs E15.5 * Ctrl |
| 10496789 | Lpar3         | NM_022983    | 0.00584688   | 1.21818 | E15.5 * Wnt1 up vs E15.5 * Ctrl |
| 10494662 | Ywhah         | NM_011738    | 0.000250694  | 1.21781 | E15.5 * Wnt1 up vs E15.5 * Ctrl |
| 10435149 | Fytd1         | NM_027226    | 6.27357e-006 | 1.21761 | E15.5 * Wnt1 up vs E15.5 * Ctrl |
| 10600502 | 2810453106Rik | NM_133703    | 0.000336545  | 1.21739 | E15.5 * Wnt1 up vs E15.5 * Ctrl |
| 10560791 | EG381936      | NM_001037248 | 0.0102409    | 1.21733 | E15.5 * Wnt1 up vs E15.5 * Ctrl |
| 10432431 | Fam186b       | NM_001081254 | 0.00693919   | 1.21721 | E15.5 * Wnt1 up vs E15.5 * Ctrl |
| 10409526 | BC021381      | NM_145382    | 0.000838293  | 1.21689 | E15.5 * Wnt1 up vs E15.5 * Ctrl |
| 10451597 | Prickle4      | ENSMUST00000 | 0.0137598    | 1.21687 | E15.5 * Wnt1 up vs E15.5 * Ctrl |
| 10459241 | Afap111       | NM_178928    | 0.0123133    | 1.21682 | E15.5 * Wnt1 up vs E15.5 * Ctrl |
| 10347970 | Cab39         | NM_133781    | 0.000633836  | 1.21669 | E15.5 * Wnt1 up vs E15.5 * Ctrl |
| 10560851 | 1700008P20Rik | NR_003638    | 0.00930672   | 1.21659 | E15.5 * Wnt1 up vs E15.5 * Ctrl |
| 10606186 | Slc16a2       | NM_009197    | 0.0038545    | 1.21639 | E15.5 * Wnt1 up vs E15.5 * Ctrl |
| 10560491 | Klc3          | NM_146182    | 0.0139627    | 1.21616 | E15.5 * Wnt1 up vs E15.5 * Ctrl |
| 10476353 | ---           | ---          | 0.0142616    | 1.21603 | E15.5 * Wnt1 up vs E15.5 * Ctrl |
| 10424894 | Heatr7a       | ENSMUST00000 | 0.000703474  | 1.21578 | E15.5 * Wnt1 up vs E15.5 * Ctrl |
| 10575840 | ---           | ---          | 0.00771301   | 1.21557 | E15.5 * Wnt1 up vs E15.5 * Ctrl |
| 10444521 | Zbtb12        | NM_198886    | 0.0114018    | 1.21551 | E15.5 * Wnt1 up vs E15.5 * Ctrl |
| 10512947 | ---           | ---          | 0.00659612   | 1.21545 | E15.5 * Wnt1 up vs E15.5 * Ctrl |
| 10408444 | Prl7c1        | NM_026206    | 0.0130719    | 1.21544 | E15.5 * Wnt1 up vs E15.5 * Ctrl |
| 10410380 | ---           | ---          | 0.0115023    | 1.21538 | E15.5 * Wnt1 up vs E15.5 * Ctrl |
| 10606064 | Rgag4         | NM_183318    | 0.0062041    | 1.21525 | E15.5 * Wnt1 up vs E15.5 * Ctrl |
| 10566172 | Olf78         | NM_130866    | 0.000351265  | 1.21497 | E15.5 * Wnt1 up vs E15.5 * Ctrl |
| 10378739 | Ywhae         | NM_009536    | 1.64259e-007 | 1.21496 | E15.5 * Wnt1 up vs E15.5 * Ctrl |
| 10346533 | Nif3l1        | NM_022988    | 0.00641874   | 1.21471 | E15.5 * Wnt1 up vs E15.5 * Ctrl |
| 10442155 | Ppp2r1a       | NM_016891    | 0.00598484   | 1.21468 | E15.5 * Wnt1 up vs E15.5 * Ctrl |
| 10447860 | Pnlcd1        | NM_001034866 | 0.0145457    | 1.21453 | E15.5 * Wnt1 up vs E15.5 * Ctrl |
| 10387251 | 2310047M10Rik | NM_028005    | 0.0133951    | 1.21447 | E15.5 * Wnt1 up vs E15.5 * Ctrl |
| 10573048 | Anapc10       | NM_026904    | 0.00600628   | 1.21432 | E15.5 * Wnt1 up vs E15.5 * Ctrl |
| 10488421 | OTTMUSG00000  | XM_001481087 | 0.00461205   | 1.21432 | E15.5 * Wnt1 up vs E15.5 * Ctrl |
| 10474851 | Bahd1         | NM_001045523 | 0.0122884    | 1.21431 | E15.5 * Wnt1 up vs E15.5 * Ctrl |
| 10520459 | Fam59b        | BC113782     | 0.00567767   | 1.21422 | E15.5 * Wnt1 up vs E15.5 * Ctrl |
| 10385484 | Ddx5          | NM_007840    | 6.00993e-006 | 1.21401 | E15.5 * Wnt1 up vs E15.5 * Ctrl |
| 10470050 | Abca2         | NM_007379    | 0.00345372   | 1.21393 | E15.5 * Wnt1 up vs E15.5 * Ctrl |
| 10608573 | Srsy          | EU052291     | 0.00172364   | 1.21387 | E15.5 * Wnt1 up vs E15.5 * Ctrl |
| 10608576 | ---           | ---          | 0.00172364   | 1.21387 | E15.5 * Wnt1 up vs E15.5 * Ctrl |
| 10437149 | ---           | ---          | 0.014416     | 1.21385 | E15.5 * Wnt1 up vs E15.5 * Ctrl |
| 10416082 | Trim35        | NM_029979    | 0.00158875   | 1.21381 | E15.5 * Wnt1 up vs E15.5 * Ctrl |
| 10434252 | Hira          | NM_010435    | 0.0066564    | 1.21377 | E15.5 * Wnt1 up vs E15.5 * Ctrl |
| 10376568 | Rai1          | NM_009021    | 0.0143062    | 1.21374 | E15.5 * Wnt1 up vs E15.5 * Ctrl |
| 10607259 | Tro           | NM_001002272 | 2.3206e-005  | 1.21357 | E15.5 * Wnt1 up vs E15.5 * Ctrl |
| 10592455 | Olf75         | NM_146828    | 0.00100444   | 1.21338 | E15.5 * Wnt1 up vs E15.5 * Ctrl |
| 10533812 | Sbno1         | NM_001081203 | 2.12758e-005 | 1.21333 | E15.5 * Wnt1 up vs E15.5 * Ctrl |
| 10573152 | Ucp1          | NM_009463    | 0.00331711   | 1.21319 | E15.5 * Wnt1 up vs E15.5 * Ctrl |
| 10556149 | Olf75         | NM_001011527 | 0.00985026   | 1.21315 | E15.5 * Wnt1 up vs E15.5 * Ctrl |
| 10348866 | Atg4b         | NM_174874    | 0.00450785   | 1.21311 | E15.5 * Wnt1 up vs E15.5 * Ctrl |
| 10489723 | Zmynd8        | NM_027230    | 0.00704797   | 1.21305 | E15.5 * Wnt1 up vs E15.5 * Ctrl |
| 10424842 | EG626280      | XM_910693    | 0.00215856   | 1.21301 | E15.5 * Wnt1 up vs E15.5 * Ctrl |
| 10416325 | Nudt18        | NM_153136    | 0.00296533   | 1.21298 | E15.5 * Wnt1 up vs E15.5 * Ctrl |
| 10600512 | Brcc3         | NM_145956    | 0.000595837  | 1.21293 | E15.5 * Wnt1 up vs E15.5 * Ctrl |
| 10476312 | 4930425F17Rik | ENSMUST00000 | 0.000436197  | 1.21283 | E15.5 * Wnt1 up vs E15.5 * Ctrl |
| 10386157 | ---           | ---          | 0.00924235   | 1.21269 | E15.5 * Wnt1 up vs E15.5 * Ctrl |
| 10508351 | Phc2          | NM_018774    | 0.00419565   | 1.21267 | E15.5 * Wnt1 up vs E15.5 * Ctrl |
| 10542857 | Far2          | NM_178797    | 0.00454427   | 1.21242 | E15.5 * Wnt1 up vs E15.5 * Ctrl |
| 10579508 | Ano8          | AK173222     | 0.0109405    | 1.2124  | E15.5 * Wnt1 up vs E15.5 * Ctrl |
| 10442870 | Ccdc78        | ENSMUST00000 | 0.00509565   | 1.21215 | E15.5 * Wnt1 up vs E15.5 * Ctrl |
| 10356999 | Prdx2         | NM_011563    | 0.00523012   | 1.2121  | E15.5 * Wnt1 up vs E15.5 * Ctrl |
| 10456158 | ENSMUSG00000  | ENSMUST00000 | 0.0143504    | 1.21204 | E15.5 * Wnt1 up vs E15.5 * Ctrl |
| 10503401 | Tmem55a       | NM_028264    | 0.000414617  | 1.21184 | E15.5 * Wnt1 up vs E15.5 * Ctrl |
| 10349932 | Etnk2         | NM_175443    | 0.00208457   | 1.21171 | E15.5 * Wnt1 up vs E15.5 * Ctrl |
| 10588582 | 6430571L13Rik | NM_175486    | 0.00756647   | 1.21169 | E15.5 * Wnt1 up vs E15.5 * Ctrl |
| 10534148 | A330070K13Rik | ENSMUST00000 | 0.00918187   | 1.21166 | E15.5 * Wnt1 up vs E15.5 * Ctrl |
| 10462861 | LOC240657     | XR_034565    | 0.00137917   | 1.21163 | E15.5 * Wnt1 up vs E15.5 * Ctrl |

|          |               |              |              |         |                                 |
|----------|---------------|--------------|--------------|---------|---------------------------------|
| 10471701 | ENSMUSG00000  | ENSMUST00000 | 0.00248398   | 1.21153 | E15.5 * Wnt1 up vs E15.5 * Ctrl |
| 10586880 | Suhw4         | NM_146224    | 0.0129055    | 1.2113  | E15.5 * Wnt1 up vs E15.5 * Ctrl |
| 10519495 | 4921511H03Rik | ENSMUST00000 | 0.0132113    | 1.21123 | E15.5 * Wnt1 up vs E15.5 * Ctrl |
| 10536949 | Fam40b        | NM_177204    | 0.00987486   | 1.21114 | E15.5 * Wnt1 up vs E15.5 * Ctrl |
| 10552288 | Vstm2b        | NM_021387    | 0.0121509    | 1.21107 | E15.5 * Wnt1 up vs E15.5 * Ctrl |
| 10554142 | 2310037124Rik | BC083325     | 0.00138801   | 1.21106 | E15.5 * Wnt1 up vs E15.5 * Ctrl |
| 10482229 | Psmb7         | NM_011187    | 0.000267236  | 1.2108  | E15.5 * Wnt1 up vs E15.5 * Ctrl |
| 10582669 | Ttc13         | NM_145607    | 0.00211889   | 1.21079 | E15.5 * Wnt1 up vs E15.5 * Ctrl |
| 10443730 | Abcg1         | NM_009593    | 0.00591572   | 1.21066 | E15.5 * Wnt1 up vs E15.5 * Ctrl |
| 10496036 | Col25a1       | NM_029838    | 0.00971327   | 1.21056 | E15.5 * Wnt1 up vs E15.5 * Ctrl |
| 10448055 | Pdcd2         | NM_008799    | 0.0121107    | 1.21053 | E15.5 * Wnt1 up vs E15.5 * Ctrl |
| 10464034 | Tectb         | NM_009348    | 0.0018979    | 1.21042 | E15.5 * Wnt1 up vs E15.5 * Ctrl |
| 10457508 | Npc1          | NM_008720    | 0.000657937  | 1.21041 | E15.5 * Wnt1 up vs E15.5 * Ctrl |
| 10603738 | 4930403L05Rik | NM_026128    | 0.00489363   | 1.21038 | E15.5 * Wnt1 up vs E15.5 * Ctrl |
| 10381744 | Arf2          | NM_007477    | 0.0124125    | 1.21032 | E15.5 * Wnt1 up vs E15.5 * Ctrl |
| 10474243 | Cstf3         | NM_145529    | 0.00574509   | 1.21016 | E15.5 * Wnt1 up vs E15.5 * Ctrl |
| 10416666 | Sugt1         | NM_026474    | 0.00577148   | 1.21015 | E15.5 * Wnt1 up vs E15.5 * Ctrl |
| 10441933 | 2210404J11Rik | NM_001039552 | 0.00454199   | 1.21001 | E15.5 * Wnt1 up vs E15.5 * Ctrl |
| 10403929 | OTTMUSG00000  | NM_001039115 | 0.00601452   | 1.21001 | E15.5 * Wnt1 up vs E15.5 * Ctrl |
| 10365408 | Ric8b         | NM_183172    | 0.00196773   | 1.20993 | E15.5 * Wnt1 up vs E15.5 * Ctrl |
| 10413695 | Pbrm1         | NM_001081251 | 0.000453422  | 1.2099  | E15.5 * Wnt1 up vs E15.5 * Ctrl |
| 10378114 | Ube2g1        | NM_025985    | 0.00059753   | 1.20977 | E15.5 * Wnt1 up vs E15.5 * Ctrl |
| 10468691 | Ablim1        | NM_178688    | 0.00842116   | 1.20973 | E15.5 * Wnt1 up vs E15.5 * Ctrl |
| 10379445 | Zfp207        | NM_001130169 | 2.27723e-006 | 1.20967 | E15.5 * Wnt1 up vs E15.5 * Ctrl |
| 10584433 | Olfr914       | NM_146786    | 0.00329818   | 1.20941 | E15.5 * Wnt1 up vs E15.5 * Ctrl |
| 10380524 | Slc35b1       | NM_016752    | 0.000392854  | 1.20933 | E15.5 * Wnt1 up vs E15.5 * Ctrl |
| 10602454 | Fam120c       | NM_198105    | 0.00163927   | 1.20926 | E15.5 * Wnt1 up vs E15.5 * Ctrl |
| 10593473 | 1810046K07Rik | BC120857     | 0.00680822   | 1.20924 | E15.5 * Wnt1 up vs E15.5 * Ctrl |
| 10563911 | ---           | ---          | 0.00271783   | 1.20895 | E15.5 * Wnt1 up vs E15.5 * Ctrl |
| 10372656 | Cpsf6         | NM_001013391 | 0.00386877   | 1.20847 | E15.5 * Wnt1 up vs E15.5 * Ctrl |
| 10563314 | Dhhdh         | NM_027903    | 0.0141281    | 1.2083  | E15.5 * Wnt1 up vs E15.5 * Ctrl |
| 10521693 | ---           | ---          | 0.00328554   | 1.20829 | E15.5 * Wnt1 up vs E15.5 * Ctrl |
| 10561861 | Ovol3         | ENSMUST00000 | 0.0106899    | 1.20819 | E15.5 * Wnt1 up vs E15.5 * Ctrl |
| 10601673 | Cstf2         | NM_133196    | 0.0062625    | 1.20805 | E15.5 * Wnt1 up vs E15.5 * Ctrl |
| 10608222 | LOC621831     | XR_031432    | 0.0109486    | 1.20797 | E15.5 * Wnt1 up vs E15.5 * Ctrl |
| 10608321 | ---           | ---          | 0.0109486    | 1.20797 | E15.5 * Wnt1 up vs E15.5 * Ctrl |
| 10608448 | LOC621831     | XR_031432    | 0.0109486    | 1.20797 | E15.5 * Wnt1 up vs E15.5 * Ctrl |
| 10402757 | A730018C14Rik | BC172018     | 0.00756805   | 1.20766 | E15.5 * Wnt1 up vs E15.5 * Ctrl |
| 10403396 | Adarb2        | NM_052977    | 0.00622894   | 1.20756 | E15.5 * Wnt1 up vs E15.5 * Ctrl |
| 10570610 | Defb4         | NM_019728    | 0.00898215   | 1.2075  | E15.5 * Wnt1 up vs E15.5 * Ctrl |
| 10424686 | BC025446      | BC025446     | 0.0137681    | 1.20734 | E15.5 * Wnt1 up vs E15.5 * Ctrl |
| 10506893 | Nrd1          | NM_146150    | 7.86884e-007 | 1.20717 | E15.5 * Wnt1 up vs E15.5 * Ctrl |
| 10449547 | ---           | ---          | 0.00786154   | 1.20715 | E15.5 * Wnt1 up vs E15.5 * Ctrl |
| 10497587 | 1600012F09Rik | NM_025904    | 0.00291941   | 1.20681 | E15.5 * Wnt1 up vs E15.5 * Ctrl |
| 10532989 | Gatc          | NM_029645    | 0.00940895   | 1.20677 | E15.5 * Wnt1 up vs E15.5 * Ctrl |
| 10411593 | Serf1         | NM_011353    | 0.00458702   | 1.20675 | E15.5 * Wnt1 up vs E15.5 * Ctrl |
| 10402294 | Moap1         | NM_022323    | 0.00181655   | 1.20658 | E15.5 * Wnt1 up vs E15.5 * Ctrl |
| 10527332 | Nptx2         | NM_016789    | 0.0131709    | 1.2065  | E15.5 * Wnt1 up vs E15.5 * Ctrl |
| 10409065 | Ptpdc1        | NM_207232    | 0.00561053   | 1.20645 | E15.5 * Wnt1 up vs E15.5 * Ctrl |
| 10370259 | Col18a1       | NM_009929    | 0.00556597   | 1.20641 | E15.5 * Wnt1 up vs E15.5 * Ctrl |
| 10515698 | BC059842      | ENSMUST00000 | 0.0107419    | 1.20629 | E15.5 * Wnt1 up vs E15.5 * Ctrl |
| 10512391 | Vcp           | NM_009503    | 0.000318363  | 1.20627 | E15.5 * Wnt1 up vs E15.5 * Ctrl |
| 10441956 | Fam120b       | NM_024203    | 0.00190198   | 1.20599 | E15.5 * Wnt1 up vs E15.5 * Ctrl |
| 10445010 | H2-M11        | NM_177635    | 0.00335078   | 1.20594 | E15.5 * Wnt1 up vs E15.5 * Ctrl |
| 10405125 | Fbxw17        | NM_175401    | 0.00316584   | 1.20556 | E15.5 * Wnt1 up vs E15.5 * Ctrl |
| 10553813 | Ube3a         | NM_011668    | 0.00400514   | 1.20536 | E15.5 * Wnt1 up vs E15.5 * Ctrl |
| 10439934 | ---           | ---          | 0.00471898   | 1.20531 | E15.5 * Wnt1 up vs E15.5 * Ctrl |
| 10493585 | Ube2q1        | NM_027315    | 0.00177704   | 1.205   | E15.5 * Wnt1 up vs E15.5 * Ctrl |
| 10362036 | Hbs1l         | NM_019702    | 2.31452e-005 | 1.20496 | E15.5 * Wnt1 up vs E15.5 * Ctrl |
| 10429391 | Slc45a4       | NM_001033219 | 0.00892045   | 1.20496 | E15.5 * Wnt1 up vs E15.5 * Ctrl |
| 10442752 | 0610007P22Rik | NM_026676    | 0.000307164  | 1.20492 | E15.5 * Wnt1 up vs E15.5 * Ctrl |
| 10405504 | Caml          | NM_007596    | 0.0065639    | 1.20483 | E15.5 * Wnt1 up vs E15.5 * Ctrl |
| 10583444 | Olfr39        | NM_146825    | 0.00994945   | 1.20462 | E15.5 * Wnt1 up vs E15.5 * Ctrl |
| 10589640 | 1700112C13Rik | NM_183103    | 0.009026     | 1.20458 | E15.5 * Wnt1 up vs E15.5 * Ctrl |
| 10463068 | Ptp4a1        | NM_011200    | 0.0129543    | 1.20451 | E15.5 * Wnt1 up vs E15.5 * Ctrl |
| 10566387 | Dub1          | NM_007887    | 0.00111955   | 1.20417 | E15.5 * Wnt1 up vs E15.5 * Ctrl |

|                        |               |              |         |                                 |
|------------------------|---------------|--------------|---------|---------------------------------|
| 10568318 BC039632      | NM_001081268  | 0.0133764    | 1.204   | E15.5 * Wnt1 up vs E15.5 * Ctrl |
| 10500412 Gpr89         | NM_026229     | 0.00268846   | 1.20391 | E15.5 * Wnt1 up vs E15.5 * Ctrl |
| 10453609 Lyl1          | NM_026092     | 0.000103221  | 1.20385 | E15.5 * Wnt1 up vs E15.5 * Ctrl |
| 10434281 LOC635992     | ENSMUST000000 | 0.00705842   | 1.20384 | E15.5 * Wnt1 up vs E15.5 * Ctrl |
| 10490777 Zfhx4         | NM_030708     | 0.00326992   | 1.20376 | E15.5 * Wnt1 up vs E15.5 * Ctrl |
| 10425914 Upk3a         | NM_023478     | 0.0138826    | 1.20366 | E15.5 * Wnt1 up vs E15.5 * Ctrl |
| 10447729 Qk            | U44941        | 0.00141162   | 1.20348 | E15.5 * Wnt1 up vs E15.5 * Ctrl |
| 10364435 Vmn2r81       | ENSMUST000000 | 0.0117468    | 1.20343 | E15.5 * Wnt1 up vs E15.5 * Ctrl |
| 10509868 Atp13a2       | NM_029097     | 0.00393001   | 1.20342 | E15.5 * Wnt1 up vs E15.5 * Ctrl |
| 10491136 Tnik          | BC137799      | 0.000862491  | 1.20333 | E15.5 * Wnt1 up vs E15.5 * Ctrl |
| 10382069 Psmc5         | NM_008950     | 2.32343e-005 | 1.20324 | E15.5 * Wnt1 up vs E15.5 * Ctrl |
| 10546349 Xpc           | NM_009531     | 0.000126206  | 1.20322 | E15.5 * Wnt1 up vs E15.5 * Ctrl |
| 10400581 Fkbp3         | NM_013902     | 0.00022737   | 1.20315 | E15.5 * Wnt1 up vs E15.5 * Ctrl |
| 10417734 Nr1d2         | NM_011584     | 0.00563696   | 1.20287 | E15.5 * Wnt1 up vs E15.5 * Ctrl |
| 10595327 Phip          | NM_001081216  | 0.00146607   | 1.20267 | E15.5 * Wnt1 up vs E15.5 * Ctrl |
| 10367413 Dnajc14       | NM_028873     | 0.0110266    | 1.20255 | E15.5 * Wnt1 up vs E15.5 * Ctrl |
| 10552284 Pin4          | NM_027181     | 0.000591124  | 1.20247 | E15.5 * Wnt1 up vs E15.5 * Ctrl |
| 10532594 Myo18b        | BC145218      | 0.00603484   | 1.20242 | E15.5 * Wnt1 up vs E15.5 * Ctrl |
| 10607398               | ---           | 0.00820708   | 1.20239 | E15.5 * Wnt1 up vs E15.5 * Ctrl |
| 10545308 Kdm3a         | NM_001038695  | 0.0138537    | 1.20214 | E15.5 * Wnt1 up vs E15.5 * Ctrl |
| 10494924 Trim33        | NM_053170     | 0.000741979  | 1.20209 | E15.5 * Wnt1 up vs E15.5 * Ctrl |
| 10478424 Ywhab         | NM_018753     | 5.83815e-005 | 1.202   | E15.5 * Wnt1 up vs E15.5 * Ctrl |
| 10391742 Gpatch8       | NM_001159492  | 0.0118089    | 1.2018  | E15.5 * Wnt1 up vs E15.5 * Ctrl |
| 10393898 Myadml2       | NM_026751     | 0.0138272    | 1.20178 | E15.5 * Wnt1 up vs E15.5 * Ctrl |
| 10350478 Glrx2         | NM_001038592  | 0.000271462  | 1.20163 | E15.5 * Wnt1 up vs E15.5 * Ctrl |
| 10572241 Pbx4          | NM_001024954  | 0.00355489   | 1.20162 | E15.5 * Wnt1 up vs E15.5 * Ctrl |
| 10605788 Zxda          | NR_003292     | 0.0047639    | 1.20156 | E15.5 * Wnt1 up vs E15.5 * Ctrl |
| 10347873 Agfg1         | NM_010472     | 0.00176612   | 1.20145 | E15.5 * Wnt1 up vs E15.5 * Ctrl |
| 10352166 9630058J23Rik | BC054802      | 0.00694828   | 1.20136 | E15.5 * Wnt1 up vs E15.5 * Ctrl |
| 10548791 Grin2b        | NM_008171     | 0.00807034   | 1.20127 | E15.5 * Wnt1 up vs E15.5 * Ctrl |
| 10365170 BC025920      | ENSMUST000000 | 0.009804     | 1.201   | E15.5 * Wnt1 up vs E15.5 * Ctrl |
| 10497773 Mccc1         | NM_023644     | 0.0102502    | 1.201   | E15.5 * Wnt1 up vs E15.5 * Ctrl |
| 10518855 Khlh21        | NM_001033352  | 0.00102827   | 1.20094 | E15.5 * Wnt1 up vs E15.5 * Ctrl |
| 10422518 Tmtc4         | NM_028651     | 0.0056854    | 1.20088 | E15.5 * Wnt1 up vs E15.5 * Ctrl |
| 10541803 Chd4          | NM_145979     | 0.000610822  | 1.20086 | E15.5 * Wnt1 up vs E15.5 * Ctrl |
| 10588722 Mon1a         | NM_028369     | 0.000671329  | 1.20085 | E15.5 * Wnt1 up vs E15.5 * Ctrl |
| 10586074               | ---           | 0.0127344    | 1.20075 | E15.5 * Wnt1 up vs E15.5 * Ctrl |
| 10476582 Macrod2       | NM_028387     | 0.000835011  | 1.20051 | E15.5 * Wnt1 up vs E15.5 * Ctrl |
| 10465500 Kcnk4         | NM_008431     | 0.0098584    | 1.2005  | E15.5 * Wnt1 up vs E15.5 * Ctrl |
| 10350377 Zbtb41        | NM_172643     | 0.00189827   | 1.20048 | E15.5 * Wnt1 up vs E15.5 * Ctrl |
| 10454103               | ---           | 0.00294454   | 1.20029 | E15.5 * Wnt1 up vs E15.5 * Ctrl |
| 10455801 Phax          | NM_019996     | 0.000682462  | 1.20022 | E15.5 * Wnt1 up vs E15.5 * Ctrl |
| 10431393 Mapk12        | NM_013871     | 0.000567043  | 1.19967 | E15.5 * Wnt1 up vs E15.5 * Ctrl |
| 10420736 Neil2         | NM_201610     | 0.00988423   | 1.19962 | E15.5 * Wnt1 up vs E15.5 * Ctrl |
| 10503917 Akirin2       | NM_001007589  | 3.78087e-005 | 1.19954 | E15.5 * Wnt1 up vs E15.5 * Ctrl |
| 10419810 Psmb5         | NM_011186     | 0.0043892    | 1.19913 | E15.5 * Wnt1 up vs E15.5 * Ctrl |
| 10482330 Atp6v1g1      | NM_024173     | 0.00269886   | 1.19904 | E15.5 * Wnt1 up vs E15.5 * Ctrl |
| 10439471 Ktelc1        | NM_172380     | 0.0141261    | 1.19852 | E15.5 * Wnt1 up vs E15.5 * Ctrl |
| 10432162 2310037124Rik | BC003301      | 2.36276e-005 | 1.19827 | E15.5 * Wnt1 up vs E15.5 * Ctrl |
| 10602501 Huwe1         | NM_021523     | 7.97118e-006 | 1.19817 | E15.5 * Wnt1 up vs E15.5 * Ctrl |
| 10536407 Phf14         | NM_029404     | 0.0007979    | 1.19816 | E15.5 * Wnt1 up vs E15.5 * Ctrl |
| 10421730 AU021034      | NM_177629     | 0.0105076    | 1.1981  | E15.5 * Wnt1 up vs E15.5 * Ctrl |
| 10556546 Calcb         | NM_054084     | 0.00698339   | 1.19802 | E15.5 * Wnt1 up vs E15.5 * Ctrl |
| 10345967 Bivm          | NM_144558     | 0.00405928   | 1.19801 | E15.5 * Wnt1 up vs E15.5 * Ctrl |
| 10555741 Olfr561       | NM_147092     | 0.00728439   | 1.19795 | E15.5 * Wnt1 up vs E15.5 * Ctrl |
| 10441923 2210404J11Rik | NM_001039552  | 0.00914947   | 1.19776 | E15.5 * Wnt1 up vs E15.5 * Ctrl |
| 10366335 Bbs10         | ENSMUST000000 | 0.00465415   | 1.19773 | E15.5 * Wnt1 up vs E15.5 * Ctrl |
| 10529313 Letm1         | NM_019694     | 0.00510594   | 1.19714 | E15.5 * Wnt1 up vs E15.5 * Ctrl |
| 10463158 Al606181      | ENSMUST000000 | 0.00678833   | 1.19702 | E15.5 * Wnt1 up vs E15.5 * Ctrl |
| 10563895               | ---           | 0.0112511    | 1.19691 | E15.5 * Wnt1 up vs E15.5 * Ctrl |
| 10388747 BC017647      | ENSMUST000000 | 0.0111497    | 1.19677 | E15.5 * Wnt1 up vs E15.5 * Ctrl |
| 10607143 Capn6         | NM_007603     | 0.00603241   | 1.19649 | E15.5 * Wnt1 up vs E15.5 * Ctrl |
| 10603125 Asb9          | NM_027027     | 0.0108818    | 1.19607 | E15.5 * Wnt1 up vs E15.5 * Ctrl |
| 10552088 ENSMUSG000000 | ENSMUST000000 | 0.00108698   | 1.19583 | E15.5 * Wnt1 up vs E15.5 * Ctrl |
| 10572109 Ints10        | NM_027590     | 0.00189322   | 1.19582 | E15.5 * Wnt1 up vs E15.5 * Ctrl |
| 10524969 Hrk           | NM_007545     | 0.00812524   | 1.19563 | E15.5 * Wnt1 up vs E15.5 * Ctrl |

|                        |              |              |         |                                 |
|------------------------|--------------|--------------|---------|---------------------------------|
| 10381018 Msl1          | NM_028722    | 0.00400324   | 1.19549 | E15.5 * Wnt1 up vs E15.5 * Ctrl |
| 10462333 Cdc37l1       | NM_025950    | 0.000352732  | 1.19542 | E15.5 * Wnt1 up vs E15.5 * Ctrl |
| 10557233 Tnrc6a        | NM_144925    | 0.00184444   | 1.19542 | E15.5 * Wnt1 up vs E15.5 * Ctrl |
| 10397249 Lin52         | NM_173756    | 0.00367931   | 1.19528 | E15.5 * Wnt1 up vs E15.5 * Ctrl |
| 10461143 Chrm1         | NM_001112697 | 0.013908     | 1.19522 | E15.5 * Wnt1 up vs E15.5 * Ctrl |
| 10448615 Rab26         | BC094931     | 0.00927683   | 1.19521 | E15.5 * Wnt1 up vs E15.5 * Ctrl |
| 10474950 Vps18         | NM_172269    | 0.0104495    | 1.19506 | E15.5 * Wnt1 up vs E15.5 * Ctrl |
| 10473919 Ckap5         | NM_029437    | 5.86034e-005 | 1.195   | E15.5 * Wnt1 up vs E15.5 * Ctrl |
| 10576940 Fam155a       | AK149049     | 0.0126402    | 1.195   | E15.5 * Wnt1 up vs E15.5 * Ctrl |
| 10562181 Lsr           | NM_017405    | 0.00809241   | 1.19483 | E15.5 * Wnt1 up vs E15.5 * Ctrl |
| 10518726 Slc25a33      | NM_027460    | 0.00665922   | 1.19476 | E15.5 * Wnt1 up vs E15.5 * Ctrl |
| 10522160 N4bp2         | NM_001024917 | 0.0113253    | 1.19465 | E15.5 * Wnt1 up vs E15.5 * Ctrl |
| 10563253 Lin7b         | NM_011698    | 0.00977624   | 1.19448 | E15.5 * Wnt1 up vs E15.5 * Ctrl |
| 10408346 ENSMUSG00000  | ENSMUST00000 | 0.0120944    | 1.19447 | E15.5 * Wnt1 up vs E15.5 * Ctrl |
| 10517948 Spen          | NM_019763    | 0.00851607   | 1.19418 | E15.5 * Wnt1 up vs E15.5 * Ctrl |
| 10474919 OTTMUSG00000  | NM_001039223 | 0.00830121   | 1.19415 | E15.5 * Wnt1 up vs E15.5 * Ctrl |
| 10418616 Dnahc1        | BC023155     | 0.000493018  | 1.19414 | E15.5 * Wnt1 up vs E15.5 * Ctrl |
| 10391610               | ---          | 0.0113148    | 1.19407 | E15.5 * Wnt1 up vs E15.5 * Ctrl |
| 10419005 Rgr           | NM_021340    | 0.00197043   | 1.19405 | E15.5 * Wnt1 up vs E15.5 * Ctrl |
| 10385761 Ube2b         | NM_009458    | 0.00754209   | 1.19375 | E15.5 * Wnt1 up vs E15.5 * Ctrl |
| 10534575 Prkrip1       | NM_025774    | 0.00688327   | 1.19368 | E15.5 * Wnt1 up vs E15.5 * Ctrl |
| 10528610 Tmub1         | NM_022418    | 0.00305263   | 1.19355 | E15.5 * Wnt1 up vs E15.5 * Ctrl |
| 10471735 Olfr335       | NM_001081410 | 0.00321526   | 1.19291 | E15.5 * Wnt1 up vs E15.5 * Ctrl |
| 10598229               | ---          | 0.00487043   | 1.19282 | E15.5 * Wnt1 up vs E15.5 * Ctrl |
| 10509930 Fbxo42        | NM_172518    | 0.0137717    | 1.19266 | E15.5 * Wnt1 up vs E15.5 * Ctrl |
| 10492755 Fga           | NM_001111048 | 0.012959     | 1.19254 | E15.5 * Wnt1 up vs E15.5 * Ctrl |
| 10434577 Vps8          | NM_001081366 | 5.13268e-005 | 1.1924  | E15.5 * Wnt1 up vs E15.5 * Ctrl |
| 10417492 EG432825      | NM_001024706 | 0.0114067    | 1.19233 | E15.5 * Wnt1 up vs E15.5 * Ctrl |
| 10480579 Mrpl41        | NM_001031808 | 0.00161266   | 1.19216 | E15.5 * Wnt1 up vs E15.5 * Ctrl |
| 10447645 5830477G23Rik | ENSMUST00000 | 0.00890766   | 1.19202 | E15.5 * Wnt1 up vs E15.5 * Ctrl |
| 10375103 Fbxw11        | NM_134015    | 0.00400984   | 1.19201 | E15.5 * Wnt1 up vs E15.5 * Ctrl |
| 10467001               | ---          | 0.0140063    | 1.19192 | E15.5 * Wnt1 up vs E15.5 * Ctrl |
| 10561140 Mrpl41        | NM_001031808 | 0.00112643   | 1.19191 | E15.5 * Wnt1 up vs E15.5 * Ctrl |
| 10512669 Pax5          | NM_008782    | 0.010126     | 1.19191 | E15.5 * Wnt1 up vs E15.5 * Ctrl |
| 10465838 Mta2          | NM_011842    | 0.00069237   | 1.19182 | E15.5 * Wnt1 up vs E15.5 * Ctrl |
| 10587621 Ripply2       | NM_001037907 | 0.00136944   | 1.19178 | E15.5 * Wnt1 up vs E15.5 * Ctrl |
| 10596796 Rbm6          | NM_029169    | 0.000911099  | 1.19162 | E15.5 * Wnt1 up vs E15.5 * Ctrl |
| 10431080 Efcab6        | NM_029946    | 0.00417549   | 1.19142 | E15.5 * Wnt1 up vs E15.5 * Ctrl |
| 10385495 Cdk2ap1       | NM_013812    | 0.00245455   | 1.19111 | E15.5 * Wnt1 up vs E15.5 * Ctrl |
| 10472630 Ubr3          | NM_001081548 | 0.00307635   | 1.19096 | E15.5 * Wnt1 up vs E15.5 * Ctrl |
| 10488844 Ncoa6         | NM_019825    | 0.00110397   | 1.19087 | E15.5 * Wnt1 up vs E15.5 * Ctrl |
| 10363498 Ppa1          | NM_026438    | 0.00121719   | 1.19081 | E15.5 * Wnt1 up vs E15.5 * Ctrl |
| 10417749 Ube2e1        | NM_009455    | 1.28918e-005 | 1.19077 | E15.5 * Wnt1 up vs E15.5 * Ctrl |
| 10533703 Rsrc2         | NM_025438    | 0.00029827   | 1.19069 | E15.5 * Wnt1 up vs E15.5 * Ctrl |
| 10594515               | ---          | 0.012597     | 1.19035 | E15.5 * Wnt1 up vs E15.5 * Ctrl |
| 10564057               | ---          | 0.0093114    | 1.19024 | E15.5 * Wnt1 up vs E15.5 * Ctrl |
| 10560964 Pou2f2        | NM_011138    | 0.0101374    | 1.19013 | E15.5 * Wnt1 up vs E15.5 * Ctrl |
| 10399897 Hbp1          | NM_153198    | 0.000206891  | 1.19009 | E15.5 * Wnt1 up vs E15.5 * Ctrl |
| 10415119 Pabpn1        | NM_019402    | 0.000132608  | 1.18989 | E15.5 * Wnt1 up vs E15.5 * Ctrl |
| 10593159 Pfah1b2       | NM_008775    | 0.00193806   | 1.18979 | E15.5 * Wnt1 up vs E15.5 * Ctrl |
| 10374181 OTTMUSG00000  | XM_001001271 | 0.000618474  | 1.18979 | E15.5 * Wnt1 up vs E15.5 * Ctrl |
| 10555921 EG545989      | ENSMUST00000 | 0.00760265   | 1.18973 | E15.5 * Wnt1 up vs E15.5 * Ctrl |
| 10349913 Kiss1         | NM_178260    | 0.00681641   | 1.1895  | E15.5 * Wnt1 up vs E15.5 * Ctrl |
| 10601272 Pin4          | NM_027181    | 0.00122794   | 1.18936 | E15.5 * Wnt1 up vs E15.5 * Ctrl |
| 10466439 Pebp1         | NM_018858    | 0.000161776  | 1.18925 | E15.5 * Wnt1 up vs E15.5 * Ctrl |
| 10381697 Hexim1        | NM_138753    | 0.0110535    | 1.1891  | E15.5 * Wnt1 up vs E15.5 * Ctrl |
| 10515144 Skint10       | NM_177668    | 0.00702906   | 1.18893 | E15.5 * Wnt1 up vs E15.5 * Ctrl |
| 10464999 Cst6          | NM_028623    | 0.0052481    | 1.18883 | E15.5 * Wnt1 up vs E15.5 * Ctrl |
| 10453248               | ---          | 0.00774876   | 1.18857 | E15.5 * Wnt1 up vs E15.5 * Ctrl |
| 10532472 Ulk1          | NM_009469    | 0.0132352    | 1.18828 | E15.5 * Wnt1 up vs E15.5 * Ctrl |
| 10489266 Chd6          | NM_173368    | 0.00208655   | 1.18813 | E15.5 * Wnt1 up vs E15.5 * Ctrl |
| 10369920 Al646023      | NM_198860    | 0.00985416   | 1.18797 | E15.5 * Wnt1 up vs E15.5 * Ctrl |
| 10542223 5430401F13Rik | ENSMUST00000 | 0.0134824    | 1.18791 | E15.5 * Wnt1 up vs E15.5 * Ctrl |
| 10408130 V1rh15        | ENSMUST00000 | 0.00829635   | 1.18759 | E15.5 * Wnt1 up vs E15.5 * Ctrl |
| 10551760 Zfp84         | NM_023750    | 0.0113132    | 1.18753 | E15.5 * Wnt1 up vs E15.5 * Ctrl |
| 10417053 Mbni2         | NM_175341    | 0.0030359    | 1.18732 | E15.5 * Wnt1 up vs E15.5 * Ctrl |

|          |               |              |              |         |                                 |
|----------|---------------|--------------|--------------|---------|---------------------------------|
| 10486858 | Mfap1a        | NM_026220    | 0.00675917   | 1.18731 | E15.5 * Wnt1 up vs E15.5 * Ctrl |
| 10350992 | Rc3h1         | NM_001024952 | 0.0100508    | 1.18714 | E15.5 * Wnt1 up vs E15.5 * Ctrl |
| 10463930 | Mxi1          | NM_010847    | 0.0112945    | 1.18696 | E15.5 * Wnt1 up vs E15.5 * Ctrl |
| 10567508 | Dnahc3        | XM_355934    | 0.00988282   | 1.18664 | E15.5 * Wnt1 up vs E15.5 * Ctrl |
| 10363894 | lpmk          | NM_027184    | 0.00433318   | 1.18662 | E15.5 * Wnt1 up vs E15.5 * Ctrl |
| 10576373 | Gas8          | NM_018855    | 0.00126403   | 1.18646 | E15.5 * Wnt1 up vs E15.5 * Ctrl |
| 10519414 | 4932412H11Rik | NM_172879    | 0.00736872   | 1.18644 | E15.5 * Wnt1 up vs E15.5 * Ctrl |
| 10421615 | Spert         | NM_026457    | 0.00652207   | 1.18643 | E15.5 * Wnt1 up vs E15.5 * Ctrl |
| 10555746 | Olfr568       | NM_147091    | 0.00165329   | 1.18634 | E15.5 * Wnt1 up vs E15.5 * Ctrl |
| 10572064 | ---           | ---          | 0.00285825   | 1.18629 | E15.5 * Wnt1 up vs E15.5 * Ctrl |
| 10525296 | Brp           | NM_028227    | 0.00266936   | 1.186   | E15.5 * Wnt1 up vs E15.5 * Ctrl |
| 10466347 | Olfr1457      | NM_146575    | 0.0114508    | 1.18583 | E15.5 * Wnt1 up vs E15.5 * Ctrl |
| 10348424 | Sh3bp4        | NM_133816    | 0.00832234   | 1.18561 | E15.5 * Wnt1 up vs E15.5 * Ctrl |
| 10396919 | 4933426M11Rik | BC040401     | 0.00355105   | 1.1856  | E15.5 * Wnt1 up vs E15.5 * Ctrl |
| 10362392 | Psmid2        | NR_027485    | 0.0089093    | 1.18546 | E15.5 * Wnt1 up vs E15.5 * Ctrl |
| 10405924 | ---           | ---          | 0.010172     | 1.18534 | E15.5 * Wnt1 up vs E15.5 * Ctrl |
| 10589756 | Epm2aip1      | NM_175266    | 0.00331679   | 1.18526 | E15.5 * Wnt1 up vs E15.5 * Ctrl |
| 10417689 | Psmid6        | NM_025550    | 0.000342558  | 1.18516 | E15.5 * Wnt1 up vs E15.5 * Ctrl |
| 10453451 | Calm2         | NM_007589    | 1.0301e-005  | 1.18514 | E15.5 * Wnt1 up vs E15.5 * Ctrl |
| 10593652 | Cyp19a1       | NM_007810    | 0.0143551    | 1.18502 | E15.5 * Wnt1 up vs E15.5 * Ctrl |
| 10424559 | Khdrbs3       | NM_010158    | 0.00353132   | 1.18488 | E15.5 * Wnt1 up vs E15.5 * Ctrl |
| 10559743 | V1rd10        | NM_207543    | 0.00519043   | 1.18459 | E15.5 * Wnt1 up vs E15.5 * Ctrl |
| 10512709 | Mcart1        | NM_001009949 | 0.000874824  | 1.18444 | E15.5 * Wnt1 up vs E15.5 * Ctrl |
| 10479607 | Lime1         | NM_023684    | 0.00333527   | 1.18438 | E15.5 * Wnt1 up vs E15.5 * Ctrl |
| 10446376 | Man2a1        | NM_008549    | 0.0100834    | 1.18432 | E15.5 * Wnt1 up vs E15.5 * Ctrl |
| 10383883 | OTTMUSG00000  | ENSMUST00000 | 0.0032339    | 1.18401 | E15.5 * Wnt1 up vs E15.5 * Ctrl |
| 10508465 | Marcksl1      | NM_010807    | 0.00302023   | 1.18372 | E15.5 * Wnt1 up vs E15.5 * Ctrl |
| 10606926 | 1700025D03Rik | NM_026469    | 0.000160655  | 1.18348 | E15.5 * Wnt1 up vs E15.5 * Ctrl |
| 10575662 | Mon1b         | NM_173015    | 0.0106777    | 1.18342 | E15.5 * Wnt1 up vs E15.5 * Ctrl |
| 10416680 | Pcdh8         | NM_021543    | 0.0122108    | 1.18336 | E15.5 * Wnt1 up vs E15.5 * Ctrl |
| 10541065 | Olfr213       | NM_001011801 | 0.00792767   | 1.18315 | E15.5 * Wnt1 up vs E15.5 * Ctrl |
| 10496892 | Fubp1         | NM_057172    | 3.54435e-005 | 1.18312 | E15.5 * Wnt1 up vs E15.5 * Ctrl |
| 10545096 | 2410003J06Rik | NM_028025    | 0.0118601    | 1.1831  | E15.5 * Wnt1 up vs E15.5 * Ctrl |
| 10488734 | Spag4l        | NM_029599    | 0.00621862   | 1.18308 | E15.5 * Wnt1 up vs E15.5 * Ctrl |
| 10550762 | EG545929      | NM_001034904 | 0.00729315   | 1.18307 | E15.5 * Wnt1 up vs E15.5 * Ctrl |
| 10550775 | ---           | ---          | 0.00729315   | 1.18307 | E15.5 * Wnt1 up vs E15.5 * Ctrl |
| 10558458 | Ppp2r2d       | NM_026391    | 0.00887708   | 1.18285 | E15.5 * Wnt1 up vs E15.5 * Ctrl |
| 10512011 | Zfp292        | NM_013889    | 0.0019031    | 1.18254 | E15.5 * Wnt1 up vs E15.5 * Ctrl |
| 10362359 | Pebp1         | NM_018858    | 0.000129461  | 1.18247 | E15.5 * Wnt1 up vs E15.5 * Ctrl |
| 10605598 | CN716893      | NM_001033492 | 0.0140511    | 1.18206 | E15.5 * Wnt1 up vs E15.5 * Ctrl |
| 10432398 | Tuba1b        | NM_011654    | 6.2609e-005  | 1.18201 | E15.5 * Wnt1 up vs E15.5 * Ctrl |
| 10489629 | Cdh22         | NM_174988    | 0.00889288   | 1.18174 | E15.5 * Wnt1 up vs E15.5 * Ctrl |
| 10479639 | Dnajc5        | NM_016775    | 0.00555593   | 1.18168 | E15.5 * Wnt1 up vs E15.5 * Ctrl |
| 10496919 | Usp33         | NM_133247    | 0.00131884   | 1.18147 | E15.5 * Wnt1 up vs E15.5 * Ctrl |
| 10423733 | Vps13b        | ENSMUST00000 | 0.0138631    | 1.18129 | E15.5 * Wnt1 up vs E15.5 * Ctrl |
| 10530563 | Fryl          | NM_028194    | 0.000573254  | 1.18098 | E15.5 * Wnt1 up vs E15.5 * Ctrl |
| 10372926 | ---           | ---          | 0.00136319   | 1.18094 | E15.5 * Wnt1 up vs E15.5 * Ctrl |
| 10579500 | Abhd8         | NM_022419    | 0.00639998   | 1.18086 | E15.5 * Wnt1 up vs E15.5 * Ctrl |
| 10525983 | Ran           | NM_009391    | 0.00145168   | 1.18071 | E15.5 * Wnt1 up vs E15.5 * Ctrl |
| 10521705 | Clrn2         | BC147371     | 0.00174482   | 1.18071 | E15.5 * Wnt1 up vs E15.5 * Ctrl |
| 10348983 | ---           | ---          | 0.00490535   | 1.18053 | E15.5 * Wnt1 up vs E15.5 * Ctrl |
| 10564849 | 2610034B18Rik | NM_027420    | 0.00502236   | 1.1805  | E15.5 * Wnt1 up vs E15.5 * Ctrl |
| 10401002 | Gphb5         | NM_175644    | 0.0122009    | 1.1805  | E15.5 * Wnt1 up vs E15.5 * Ctrl |
| 10515080 | 4930522H14Rik | NM_026291    | 0.00813449   | 1.17995 | E15.5 * Wnt1 up vs E15.5 * Ctrl |
| 10374151 | Zmiz2         | NM_028601    | 0.0120853    | 1.17995 | E15.5 * Wnt1 up vs E15.5 * Ctrl |
| 10599346 | Polr2k        | NM_001039368 | 0.010803     | 1.17992 | E15.5 * Wnt1 up vs E15.5 * Ctrl |
| 10440717 | Krtap6-1      | ENSMUST00000 | 0.00426004   | 1.17992 | E15.5 * Wnt1 up vs E15.5 * Ctrl |
| 10390084 | A430060F13Rik | ENSMUST00000 | 0.0118273    | 1.17992 | E15.5 * Wnt1 up vs E15.5 * Ctrl |
| 10455094 | Pcdhb13       | NM_053138    | 0.010573     | 1.1798  | E15.5 * Wnt1 up vs E15.5 * Ctrl |
| 10419596 | Zfp219        | NM_027248    | 0.0112601    | 1.17951 | E15.5 * Wnt1 up vs E15.5 * Ctrl |
| 10584602 | ENSMUSG00000  | ENSMUST00000 | 0.00727943   | 1.1795  | E15.5 * Wnt1 up vs E15.5 * Ctrl |
| 10391410 | Becn1         | NM_019584    | 0.00359222   | 1.17937 | E15.5 * Wnt1 up vs E15.5 * Ctrl |
| 10434670 | EG666421      | XR_035704    | 0.00196007   | 1.17932 | E15.5 * Wnt1 up vs E15.5 * Ctrl |
| 10569771 | Mcoln1        | NM_053177    | 0.009315     | 1.17922 | E15.5 * Wnt1 up vs E15.5 * Ctrl |
| 10432139 | Zfp641        | NM_173769    | 0.00633384   | 1.17908 | E15.5 * Wnt1 up vs E15.5 * Ctrl |
| 10381617 | ---           | ---          | 0.00663237   | 1.17902 | E15.5 * Wnt1 up vs E15.5 * Ctrl |

|          |               |               |             |         |                                 |
|----------|---------------|---------------|-------------|---------|---------------------------------|
| 10369132 | Fam184a       | NM_001081428  | 0.0125376   | 1.17893 | E15.5 * Wnt1 up vs E15.5 * Ctrl |
| 10497181 | 1700008P02Rik | ENSMUST000000 | 0.00932265  | 1.17893 | E15.5 * Wnt1 up vs E15.5 * Ctrl |
| 10406795 | Gfm2          | NM_177266     | 0.00222743  | 1.17891 | E15.5 * Wnt1 up vs E15.5 * Ctrl |
| 10410690 | ---           | ---           | 0.00389101  | 1.17887 | E15.5 * Wnt1 up vs E15.5 * Ctrl |
| 10361200 | AA408296      | NM_145415     | 0.0013864   | 1.17868 | E15.5 * Wnt1 up vs E15.5 * Ctrl |
| 10422500 | EG328479      | NM_177817     | 0.00644642  | 1.17868 | E15.5 * Wnt1 up vs E15.5 * Ctrl |
| 10414493 | Olfir748      | NM_001011837  | 0.0093615   | 1.17836 | E15.5 * Wnt1 up vs E15.5 * Ctrl |
| 10467342 | ENSMUSG00000  | ENSMUST000000 | 0.0110977   | 1.17828 | E15.5 * Wnt1 up vs E15.5 * Ctrl |
| 10581640 | Atxn1l        | ENSMUST000000 | 0.000880283 | 1.17809 | E15.5 * Wnt1 up vs E15.5 * Ctrl |
| 10450669 | Prr3          | NM_145487     | 0.000149669 | 1.17806 | E15.5 * Wnt1 up vs E15.5 * Ctrl |
| 10475293 | Tubgcp4       | NM_153387     | 0.00947254  | 1.17793 | E15.5 * Wnt1 up vs E15.5 * Ctrl |
| 10525336 | Fam109a       | NM_175474     | 0.00278102  | 1.17791 | E15.5 * Wnt1 up vs E15.5 * Ctrl |
| 10507719 | Sifnl1        | NM_177570     | 0.0117724   | 1.17779 | E15.5 * Wnt1 up vs E15.5 * Ctrl |
| 10534988 | ---           | ---           | 0.00526224  | 1.17771 | E15.5 * Wnt1 up vs E15.5 * Ctrl |
| 10387625 | Chrnbl        | NM_009601     | 0.00233957  | 1.17731 | E15.5 * Wnt1 up vs E15.5 * Ctrl |
| 10463361 | Scd4          | NM_183216     | 0.00607406  | 1.17711 | E15.5 * Wnt1 up vs E15.5 * Ctrl |
| 10386495 | Tom1l2        | NM_153080     | 0.00397935  | 1.1771  | E15.5 * Wnt1 up vs E15.5 * Ctrl |
| 10453461 | Fbxo11        | NM_001081034  | 0.000908521 | 1.17701 | E15.5 * Wnt1 up vs E15.5 * Ctrl |
| 10541349 | ---           | ---           | 0.00388241  | 1.17696 | E15.5 * Wnt1 up vs E15.5 * Ctrl |
| 10449654 | ENSMUSG00000  | ENSMUST000000 | 0.00149489  | 1.17655 | E15.5 * Wnt1 up vs E15.5 * Ctrl |
| 10380384 | Ankrd40       | NM_027799     | 0.00130552  | 1.17635 | E15.5 * Wnt1 up vs E15.5 * Ctrl |
| 10462791 | March5        | NM_027314     | 0.00703131  | 1.17632 | E15.5 * Wnt1 up vs E15.5 * Ctrl |
| 10462330 | Ppapdc2       | NM_028922     | 0.00988092  | 1.17632 | E15.5 * Wnt1 up vs E15.5 * Ctrl |
| 10388938 | Wsb1          | NM_019653     | 0.00473977  | 1.17628 | E15.5 * Wnt1 up vs E15.5 * Ctrl |
| 10530666 | Lnx1          | NM_010727     | 0.000334993 | 1.17626 | E15.5 * Wnt1 up vs E15.5 * Ctrl |
| 10437846 | Ifitm7        | NM_028968     | 0.00219671  | 1.17625 | E15.5 * Wnt1 up vs E15.5 * Ctrl |
| 10377001 | Tmem220       | NM_177392     | 0.0133248   | 1.17617 | E15.5 * Wnt1 up vs E15.5 * Ctrl |
| 10367515 | ---           | ---           | 0.000400717 | 1.17613 | E15.5 * Wnt1 up vs E15.5 * Ctrl |
| 10537169 | Akr1b7        | NM_009731     | 0.0146003   | 1.1756  | E15.5 * Wnt1 up vs E15.5 * Ctrl |
| 10473477 | ---           | ---           | 0.000979798 | 1.17553 | E15.5 * Wnt1 up vs E15.5 * Ctrl |
| 10502982 | Tnni3k        | NM_177066     | 0.00211331  | 1.17539 | E15.5 * Wnt1 up vs E15.5 * Ctrl |
| 10477361 | Efcab8        | BC144855      | 0.00685439  | 1.17518 | E15.5 * Wnt1 up vs E15.5 * Ctrl |
| 10608298 | ---           | ---           | 0.00529633  | 1.17514 | E15.5 * Wnt1 up vs E15.5 * Ctrl |
| 10608311 | ---           | ---           | 0.00529633  | 1.17514 | E15.5 * Wnt1 up vs E15.5 * Ctrl |
| 10608533 | ---           | ---           | 0.00529633  | 1.17514 | E15.5 * Wnt1 up vs E15.5 * Ctrl |
| 10353707 | Ptp4a1        | NM_011200     | 0.00571775  | 1.17496 | E15.5 * Wnt1 up vs E15.5 * Ctrl |
| 10495197 | ENSMUSG00000  | ENSMUST000000 | 0.0143555   | 1.17479 | E15.5 * Wnt1 up vs E15.5 * Ctrl |
| 10584071 | Pdm10         | NM_001080817  | 0.00460598  | 1.17473 | E15.5 * Wnt1 up vs E15.5 * Ctrl |
| 10384529 | Cep68         | NM_172260     | 0.00291093  | 1.17471 | E15.5 * Wnt1 up vs E15.5 * Ctrl |
| 10366528 | Best3         | NM_001007583  | 0.00943142  | 1.17442 | E15.5 * Wnt1 up vs E15.5 * Ctrl |
| 10511282 | Tnfrsf4       | NM_011659     | 0.00237071  | 1.17437 | E15.5 * Wnt1 up vs E15.5 * Ctrl |
| 10550003 | Zfp606        | NM_026112     | 0.00380887  | 1.17411 | E15.5 * Wnt1 up vs E15.5 * Ctrl |
| 10607679 | 4932441K18Rik | NM_178935     | 0.0134841   | 1.17393 | E15.5 * Wnt1 up vs E15.5 * Ctrl |
| 10352957 | Rgs20         | NM_021374     | 0.0057088   | 1.17369 | E15.5 * Wnt1 up vs E15.5 * Ctrl |
| 10402444 | Dicer1        | NM_148948     | 0.000216164 | 1.17366 | E15.5 * Wnt1 up vs E15.5 * Ctrl |
| 10544501 | Ezh2          | NM_007971     | 0.000942956 | 1.17335 | E15.5 * Wnt1 up vs E15.5 * Ctrl |
| 10559513 | Cab39         | NM_133781     | 0.0065139   | 1.17335 | E15.5 * Wnt1 up vs E15.5 * Ctrl |
| 10489458 | Svs4          | NM_009300     | 0.00212087  | 1.17333 | E15.5 * Wnt1 up vs E15.5 * Ctrl |
| 10512807 | Gabbr2        | NM_001081141  | 0.00296063  | 1.17317 | E15.5 * Wnt1 up vs E15.5 * Ctrl |
| 10577560 | Ikbkb         | NM_010546     | 0.00402475  | 1.17313 | E15.5 * Wnt1 up vs E15.5 * Ctrl |
| 10511898 | Gja10         | NM_010289     | 0.0120007   | 1.17307 | E15.5 * Wnt1 up vs E15.5 * Ctrl |
| 10356475 | Arl4c         | NM_177305     | 0.00809654  | 1.17306 | E15.5 * Wnt1 up vs E15.5 * Ctrl |
| 10426150 | Panx2         | NM_001002005  | 0.00567976  | 1.17294 | E15.5 * Wnt1 up vs E15.5 * Ctrl |
| 10590962 | 1700012B09Rik | NM_029306     | 0.000603047 | 1.17279 | E15.5 * Wnt1 up vs E15.5 * Ctrl |
| 10601091 | Foxo4         | NM_018789     | 0.000718544 | 1.17259 | E15.5 * Wnt1 up vs E15.5 * Ctrl |
| 10494299 | Ensa          | NM_019561     | 0.00271706  | 1.17244 | E15.5 * Wnt1 up vs E15.5 * Ctrl |
| 10363983 | Bcr           | NM_001081412  | 0.00390372  | 1.1724  | E15.5 * Wnt1 up vs E15.5 * Ctrl |
| 10499996 | Snx27         | NM_029721     | 0.000764642 | 1.17237 | E15.5 * Wnt1 up vs E15.5 * Ctrl |
| 10513867 | Cdk5rap2      | ENSMUST000000 | 0.000254647 | 1.17205 | E15.5 * Wnt1 up vs E15.5 * Ctrl |
| 10374564 | Cct4          | NM_009837     | 0.000703594 | 1.17183 | E15.5 * Wnt1 up vs E15.5 * Ctrl |
| 10379891 | Ppm1d         | NM_016910     | 0.00862847  | 1.1717  | E15.5 * Wnt1 up vs E15.5 * Ctrl |
| 10418989 | ---           | ---           | 0.00686672  | 1.17147 | E15.5 * Wnt1 up vs E15.5 * Ctrl |
| 10452419 | Efnaf5        | NM_207654     | 0.000771211 | 1.17143 | E15.5 * Wnt1 up vs E15.5 * Ctrl |
| 10529068 | Slc30a3       | NM_011773     | 0.00544847  | 1.17108 | E15.5 * Wnt1 up vs E15.5 * Ctrl |
| 10533807 | Cdk2ap1       | NM_013812     | 0.00459918  | 1.17083 | E15.5 * Wnt1 up vs E15.5 * Ctrl |
| 10345037 | Paqr8         | NM_028829     | 0.000201921 | 1.17063 | E15.5 * Wnt1 up vs E15.5 * Ctrl |

|                        |              |              |         |                                 |
|------------------------|--------------|--------------|---------|---------------------------------|
| 10359299               | ---          | 0.0121094    | 1.17027 | E15.5 * Wnt1 up vs E15.5 * Ctrl |
| 10437330 Crebbp        | ENSMUST00000 | 6.50465e-005 | 1.17006 | E15.5 * Wnt1 up vs E15.5 * Ctrl |
| 10378154 Zzef1         | NM_001045536 | 0.00556089   | 1.16959 | E15.5 * Wnt1 up vs E15.5 * Ctrl |
| 10557631 Prr14         | NM_145589    | 0.000682023  | 1.16954 | E15.5 * Wnt1 up vs E15.5 * Ctrl |
| 10587255 Khlh31        | NM_172925    | 0.0147855    | 1.16953 | E15.5 * Wnt1 up vs E15.5 * Ctrl |
| 10396358 Ppm1a         | NM_008910    | 0.00291322   | 1.16948 | E15.5 * Wnt1 up vs E15.5 * Ctrl |
| 10401882 Gtf2a1        | NM_031391    | 0.000140262  | 1.1694  | E15.5 * Wnt1 up vs E15.5 * Ctrl |
| 10432734 4732456N10Rik | NM_177717    | 0.00625275   | 1.16935 | E15.5 * Wnt1 up vs E15.5 * Ctrl |
| 10414987 OTTMUSG00000  | ENSMUST00000 | 0.0075717    | 1.16932 | E15.5 * Wnt1 up vs E15.5 * Ctrl |
| 10538100 Repin1        | NM_001079901 | 0.0023178    | 1.169   | E15.5 * Wnt1 up vs E15.5 * Ctrl |
| 10469575 OTTMUSG00000  | NR_002688    | 0.00577711   | 1.16882 | E15.5 * Wnt1 up vs E15.5 * Ctrl |
| 10581049 Cmtm2a        | NM_027022    | 0.00417101   | 1.16858 | E15.5 * Wnt1 up vs E15.5 * Ctrl |
| 10370541               | ---          | 0.0123484    | 1.16837 | E15.5 * Wnt1 up vs E15.5 * Ctrl |
| 10433963 Ydjc          | NM_026940    | 0.0105855    | 1.168   | E15.5 * Wnt1 up vs E15.5 * Ctrl |
| 10392998 Caskin2       | NM_080643    | 0.00526211   | 1.16794 | E15.5 * Wnt1 up vs E15.5 * Ctrl |
| 10407300 4930544M13Rik | ENSMUST00000 | 0.0131666    | 1.16709 | E15.5 * Wnt1 up vs E15.5 * Ctrl |
| 10365145 Tle2          | NM_019725    | 0.012464     | 1.16673 | E15.5 * Wnt1 up vs E15.5 * Ctrl |
| 10592942 Mll1          | NM_001081049 | 0.000145662  | 1.16663 | E15.5 * Wnt1 up vs E15.5 * Ctrl |
| 10467315 I830134H01Rik | ENSMUST00000 | 0.00617446   | 1.16651 | E15.5 * Wnt1 up vs E15.5 * Ctrl |
| 10598187               | ---          | 0.0021681    | 1.16644 | E15.5 * Wnt1 up vs E15.5 * Ctrl |
| 10418578 Nisch         | NM_022656    | 0.00597718   | 1.16631 | E15.5 * Wnt1 up vs E15.5 * Ctrl |
| 10575861 Hsbp1         | NM_024219    | 0.00148312   | 1.16612 | E15.5 * Wnt1 up vs E15.5 * Ctrl |
| 10516943 Atpif1        | NM_007512    | 0.000236305  | 1.16594 | E15.5 * Wnt1 up vs E15.5 * Ctrl |
| 10579422 Kcnn1         | NM_032397    | 0.0015347    | 1.16593 | E15.5 * Wnt1 up vs E15.5 * Ctrl |
| 10545032 V1rc17        | NM_134172    | 0.00350225   | 1.16585 | E15.5 * Wnt1 up vs E15.5 * Ctrl |
| 10397741 Psmc1         | NM_008947    | 0.00814414   | 1.16531 | E15.5 * Wnt1 up vs E15.5 * Ctrl |
| 10354168 Tbc1d8        | NM_018775    | 0.00721108   | 1.16508 | E15.5 * Wnt1 up vs E15.5 * Ctrl |
| 10539321 Ccdc142       | NM_001081266 | 0.00957762   | 1.16502 | E15.5 * Wnt1 up vs E15.5 * Ctrl |
| 10454525 lws1          | NM_173441    | 0.000535747  | 1.16486 | E15.5 * Wnt1 up vs E15.5 * Ctrl |
| 10414947 EG667677      | ENSMUST00000 | 0.010842     | 1.16481 | E15.5 * Wnt1 up vs E15.5 * Ctrl |
| 10375704 Sqstm1        | NM_011018    | 0.000239623  | 1.16475 | E15.5 * Wnt1 up vs E15.5 * Ctrl |
| 10531133 Grsf1         | NM_178700    | 0.000104302  | 1.16474 | E15.5 * Wnt1 up vs E15.5 * Ctrl |
| 10505438 Orm1          | NM_008768    | 0.00616166   | 1.1647  | E15.5 * Wnt1 up vs E15.5 * Ctrl |
| 10566403 Olfr668       | NM_147059    | 0.00182015   | 1.16451 | E15.5 * Wnt1 up vs E15.5 * Ctrl |
| 10575129 Vps4a         | NM_126165    | 0.00370612   | 1.16434 | E15.5 * Wnt1 up vs E15.5 * Ctrl |
| 10537826 Olfr435       | NM_146653    | 0.00611116   | 1.16411 | E15.5 * Wnt1 up vs E15.5 * Ctrl |
| 10447708 Qk            | NM_021881    | 0.00109745   | 1.16389 | E15.5 * Wnt1 up vs E15.5 * Ctrl |
| 10459637               | ---          | 0.00486302   | 1.16383 | E15.5 * Wnt1 up vs E15.5 * Ctrl |
| 10412378 H3f3a         | NM_008210    | 1.69722e-005 | 1.1638  | E15.5 * Wnt1 up vs E15.5 * Ctrl |
| 10578743 Adam29        | NM_175939    | 0.0044393    | 1.16354 | E15.5 * Wnt1 up vs E15.5 * Ctrl |
| 10438112 Pi4ka         | NM_001001983 | 0.00121308   | 1.16348 | E15.5 * Wnt1 up vs E15.5 * Ctrl |
| 10426507 Arid2         | NM_175251    | 0.0020469    | 1.16346 | E15.5 * Wnt1 up vs E15.5 * Ctrl |
| 10397277 Fcf1          | NM_028632    | 0.0111404    | 1.1634  | E15.5 * Wnt1 up vs E15.5 * Ctrl |
| 10390901 Krtap1-4      | NM_001039502 | 0.0114897    | 1.16318 | E15.5 * Wnt1 up vs E15.5 * Ctrl |
| 10597173 Nradd         | NM_026012    | 0.0030462    | 1.16312 | E15.5 * Wnt1 up vs E15.5 * Ctrl |
| 10388896               | ---          | 0.0144138    | 1.16311 | E15.5 * Wnt1 up vs E15.5 * Ctrl |
| 10461038 Macrodl       | NM_134147    | 0.00451391   | 1.16288 | E15.5 * Wnt1 up vs E15.5 * Ctrl |
| 10391348 Fam134c       | NM_028933    | 0.00972046   | 1.16281 | E15.5 * Wnt1 up vs E15.5 * Ctrl |
| 10601484 2010106E10Rik | NM_026333    | 0.00157675   | 1.1628  | E15.5 * Wnt1 up vs E15.5 * Ctrl |
| 10527888 Gatad1        | NM_026033    | 0.00108712   | 1.16268 | E15.5 * Wnt1 up vs E15.5 * Ctrl |
| 10547789 Grccl10       | NM_013535    | 0.0125792    | 1.16205 | E15.5 * Wnt1 up vs E15.5 * Ctrl |
| 10467489 Ptp4a1        | NM_011200    | 0.00874385   | 1.16202 | E15.5 * Wnt1 up vs E15.5 * Ctrl |
| 10389170 Gas2l2        | NM_001013759 | 0.00214638   | 1.16183 | E15.5 * Wnt1 up vs E15.5 * Ctrl |
| 10560035 Zscan18       | BC094341     | 0.00341841   | 1.16174 | E15.5 * Wnt1 up vs E15.5 * Ctrl |
| 10485395 Trim44        | NM_020267    | 0.00236031   | 1.16164 | E15.5 * Wnt1 up vs E15.5 * Ctrl |
| 10532317 Gtpbp6        | NM_145147    | 0.00977362   | 1.16138 | E15.5 * Wnt1 up vs E15.5 * Ctrl |
| 10473343 Med19         | NM_025885    | 0.0121547    | 1.16132 | E15.5 * Wnt1 up vs E15.5 * Ctrl |
| 10447695               | ---          | 0.00385464   | 1.16118 | E15.5 * Wnt1 up vs E15.5 * Ctrl |
| 10571474 Pcm1          | NM_023662    | 0.00760961   | 1.16115 | E15.5 * Wnt1 up vs E15.5 * Ctrl |
| 10546631 Frmd4b        | NM_145148    | 0.0121771    | 1.16109 | E15.5 * Wnt1 up vs E15.5 * Ctrl |
| 10372443 Tph2          | NM_173391    | 0.0100141    | 1.16077 | E15.5 * Wnt1 up vs E15.5 * Ctrl |
| 10515280               | ---          | 0.00745219   | 1.16071 | E15.5 * Wnt1 up vs E15.5 * Ctrl |
| 10420131 Rabggtla      | NM_019519    | 0.013408     | 1.16028 | E15.5 * Wnt1 up vs E15.5 * Ctrl |
| 10486867 Mfap1a        | NM_026220    | 0.00492077   | 1.16014 | E15.5 * Wnt1 up vs E15.5 * Ctrl |
| 10414522 Apex1         | NM_009687    | 0.00285729   | 1.16013 | E15.5 * Wnt1 up vs E15.5 * Ctrl |
| 10606263 Atrx          | NM_009530    | 0.00972349   | 1.15992 | E15.5 * Wnt1 up vs E15.5 * Ctrl |

|                        |              |              |         |                                 |
|------------------------|--------------|--------------|---------|---------------------------------|
| 10443550 Rnf8          | NM_021419    | 0.00251256   | 1.15984 | E15.5 * Wnt1 up vs E15.5 * Ctrl |
| 10386965 AU040829      | NM_175003    | 0.00893397   | 1.15978 | E15.5 * Wnt1 up vs E15.5 * Ctrl |
| 10532984 Dynl1         | NM_019682    | 0.00196408   | 1.15966 | E15.5 * Wnt1 up vs E15.5 * Ctrl |
| 10478463 Svs6          | NM_013679    | 0.000344465  | 1.15954 | E15.5 * Wnt1 up vs E15.5 * Ctrl |
| 10430096 Lrrc24        | NM_198119    | 0.00118084   | 1.15945 | E15.5 * Wnt1 up vs E15.5 * Ctrl |
| 10520417 Gm1040        | ENSMUST00000 | 0.0119156    | 1.15942 | E15.5 * Wnt1 up vs E15.5 * Ctrl |
| 10557206 Rbbp6         | NM_175023    | 9.52853e-005 | 1.15889 | E15.5 * Wnt1 up vs E15.5 * Ctrl |
| 10544263 1700016G05Rik | NM_026317    | 0.00785554   | 1.15879 | E15.5 * Wnt1 up vs E15.5 * Ctrl |
| 10383545 Foxk2         | NM_001080932 | 0.00621417   | 1.1586  | E15.5 * Wnt1 up vs E15.5 * Ctrl |
| 10594969 Unc13c        | NM_001081153 | 0.0138537    | 1.15837 | E15.5 * Wnt1 up vs E15.5 * Ctrl |
| 10429462 1700016M24Rik | BC111897     | 0.0105648    | 1.15829 | E15.5 * Wnt1 up vs E15.5 * Ctrl |
| 10566877 Sbf2          | BC067204     | 0.00190124   | 1.15807 | E15.5 * Wnt1 up vs E15.5 * Ctrl |
| 10528236               | ---          | 0.013002     | 1.15759 | E15.5 * Wnt1 up vs E15.5 * Ctrl |
| 10527559 Polr1d        | NM_009087    | 0.0145643    | 1.15748 | E15.5 * Wnt1 up vs E15.5 * Ctrl |
| 10562767 1700008O03Rik | ENSMUST00000 | 0.00503503   | 1.15726 | E15.5 * Wnt1 up vs E15.5 * Ctrl |
| 10352194 Cdc42bpa      | BC158017     | 0.00388887   | 1.15701 | E15.5 * Wnt1 up vs E15.5 * Ctrl |
| 10471761 Olfr352       | NM_146940    | 0.013186     | 1.15641 | E15.5 * Wnt1 up vs E15.5 * Ctrl |
| 10425527 Ep300         | NM_177821    | 0.00279671   | 1.15621 | E15.5 * Wnt1 up vs E15.5 * Ctrl |
| 10537318 Trim24        | NM_145076    | 0.0063459    | 1.15617 | E15.5 * Wnt1 up vs E15.5 * Ctrl |
| 10521031 Ywhah         | NM_011738    | 0.0133289    | 1.15617 | E15.5 * Wnt1 up vs E15.5 * Ctrl |
| 10464342 6430537H07Rik | NM_178689    | 0.0043126    | 1.15595 | E15.5 * Wnt1 up vs E15.5 * Ctrl |
| 10371987 Metap2        | NM_019648    | 0.000321721  | 1.15554 | E15.5 * Wnt1 up vs E15.5 * Ctrl |
| 10426240 LOC672946     | XM_001474273 | 0.00894853   | 1.15538 | E15.5 * Wnt1 up vs E15.5 * Ctrl |
| 10465263 Dpf2          | NM_011262    | 0.00864235   | 1.15531 | E15.5 * Wnt1 up vs E15.5 * Ctrl |
| 10455974 Dctn4         | NM_026302    | 0.0084548    | 1.1551  | E15.5 * Wnt1 up vs E15.5 * Ctrl |
| 10360794 Fbxo28        | NM_175127    | 0.000284725  | 1.15499 | E15.5 * Wnt1 up vs E15.5 * Ctrl |
| 10499839 Snapin        | NM_133854    | 0.000790562  | 1.15417 | E15.5 * Wnt1 up vs E15.5 * Ctrl |
| 10579925 Gab1          | NM_021356    | 0.0107271    | 1.15383 | E15.5 * Wnt1 up vs E15.5 * Ctrl |
| 10597933               | ---          | 0.00214855   | 1.15371 | E15.5 * Wnt1 up vs E15.5 * Ctrl |
| 10386743 Epn2          | NM_010148    | 0.000371436  | 1.15369 | E15.5 * Wnt1 up vs E15.5 * Ctrl |
| 10349480 R3hdm1        | NM_181750    | 0.00969913   | 1.15361 | E15.5 * Wnt1 up vs E15.5 * Ctrl |
| 10537957 Krba1         | NM_133922    | 0.00750193   | 1.1534  | E15.5 * Wnt1 up vs E15.5 * Ctrl |
| 10532901 OTTMUSG00000  | XR_033041    | 0.00344324   | 1.15329 | E15.5 * Wnt1 up vs E15.5 * Ctrl |
| 10563961               | ---          | 0.00142706   | 1.15297 | E15.5 * Wnt1 up vs E15.5 * Ctrl |
| 10426042 Gramd4        | NM_172611    | 0.014424     | 1.15287 | E15.5 * Wnt1 up vs E15.5 * Ctrl |
| 10470392 Adamtsl2      | NM_029981    | 0.000559039  | 1.15276 | E15.5 * Wnt1 up vs E15.5 * Ctrl |
| 10498296 Commd2        | NM_175095    | 0.00274274   | 1.15204 | E15.5 * Wnt1 up vs E15.5 * Ctrl |
| 10540507 H3f3a         | NM_008210    | 8.47805e-005 | 1.15189 | E15.5 * Wnt1 up vs E15.5 * Ctrl |
| 10363481 Nodal         | NM_013611    | 0.00953017   | 1.1518  | E15.5 * Wnt1 up vs E15.5 * Ctrl |
| 10514405 Plaa          | NM_172695    | 0.00705328   | 1.15159 | E15.5 * Wnt1 up vs E15.5 * Ctrl |
| 10544608               | ---          | 0.00711631   | 1.15152 | E15.5 * Wnt1 up vs E15.5 * Ctrl |
| 10387014 Map2k4        | NM_009157    | 0.00856913   | 1.15085 | E15.5 * Wnt1 up vs E15.5 * Ctrl |
| 10358717 1700025G04Rik | BC034723     | 0.00539851   | 1.15084 | E15.5 * Wnt1 up vs E15.5 * Ctrl |
| 10357917 Tmem183a      | NM_020588    | 0.0121951    | 1.15082 | E15.5 * Wnt1 up vs E15.5 * Ctrl |
| 10560760 EG545929      | NM_001034904 | 0.0130355    | 1.15041 | E15.5 * Wnt1 up vs E15.5 * Ctrl |
| 10560773 EG545929      | NM_001034904 | 0.0130355    | 1.15041 | E15.5 * Wnt1 up vs E15.5 * Ctrl |
| 10560803 EG545929      | NM_001034904 | 0.0130355    | 1.15041 | E15.5 * Wnt1 up vs E15.5 * Ctrl |
| 10397281 Ylpm1         | NM_178363    | 0.000775252  | 1.15021 | E15.5 * Wnt1 up vs E15.5 * Ctrl |
| 10527430 Arpc1a        | NM_019767    | 0.00109571   | 1.15019 | E15.5 * Wnt1 up vs E15.5 * Ctrl |
| 10347254 Smarcal1      | NM_018817    | 0.00464292   | 1.1488  | E15.5 * Wnt1 up vs E15.5 * Ctrl |
| 10460018 Zfp236        | BC138187     | 0.00390656   | 1.14853 | E15.5 * Wnt1 up vs E15.5 * Ctrl |
| 10593367 Dlat          | NM_145614    | 0.00297958   | 1.14836 | E15.5 * Wnt1 up vs E15.5 * Ctrl |
| 10561748 1700067C01Rik | NM_029714    | 0.00482782   | 1.14795 | E15.5 * Wnt1 up vs E15.5 * Ctrl |
| 10569513 Osbp15        | NM_024289    | 0.00719284   | 1.14771 | E15.5 * Wnt1 up vs E15.5 * Ctrl |
| 10376474 Mrpl55        | NM_026035    | 0.012053     | 1.14734 | E15.5 * Wnt1 up vs E15.5 * Ctrl |
| 10569992 LOC674846     | XR_031532    | 0.00657029   | 1.1473  | E15.5 * Wnt1 up vs E15.5 * Ctrl |
| 10364112 EG333669      | NM_198635    | 0.0087498    | 1.14694 | E15.5 * Wnt1 up vs E15.5 * Ctrl |
| 10498332 Siah2         | NM_009174    | 0.0145645    | 1.14682 | E15.5 * Wnt1 up vs E15.5 * Ctrl |
| 10372478 Rab21         | NM_024454    | 0.00696974   | 1.14589 | E15.5 * Wnt1 up vs E15.5 * Ctrl |
| 10595798 BC043934      | BC035950     | 0.00724597   | 1.14561 | E15.5 * Wnt1 up vs E15.5 * Ctrl |
| 10454966 Ik            | NM_011879    | 0.000228339  | 1.14559 | E15.5 * Wnt1 up vs E15.5 * Ctrl |
| 10577419               | ---          | 0.00497566   | 1.14548 | E15.5 * Wnt1 up vs E15.5 * Ctrl |
| 10518361 Smarca5       | NM_053124    | 0.0117628    | 1.1451  | E15.5 * Wnt1 up vs E15.5 * Ctrl |
| 10427807 Sub1          | NM_011294    | 2.46433e-005 | 1.14494 | E15.5 * Wnt1 up vs E15.5 * Ctrl |
| 10600836 Msn           | NM_010833    | 0.00680532   | 1.14492 | E15.5 * Wnt1 up vs E15.5 * Ctrl |
| 10568638 Uros          | NM_009479    | 0.0125432    | 1.14445 | E15.5 * Wnt1 up vs E15.5 * Ctrl |

|                        |              |              |         |                                 |
|------------------------|--------------|--------------|---------|---------------------------------|
| 10410007 Fbp1          | NM_019395    | 0.0123634    | 1.14438 | E15.5 * Wnt1 up vs E15.5 * Ctrl |
| 10592938 Ttc36         | NM_138951    | 0.0112332    | 1.14433 | E15.5 * Wnt1 up vs E15.5 * Ctrl |
| 10383754               | ---          | 0.0125166    | 1.14414 | E15.5 * Wnt1 up vs E15.5 * Ctrl |
| 10441610 Rshl2a        | NM_025789    | 0.00547632   | 1.14384 | E15.5 * Wnt1 up vs E15.5 * Ctrl |
| 10450435 Csnk2b        | NM_009975    | 0.00976362   | 1.14342 | E15.5 * Wnt1 up vs E15.5 * Ctrl |
| 10505107 Actl7a        | NM_009611    | 0.0137147    | 1.14341 | E15.5 * Wnt1 up vs E15.5 * Ctrl |
| 10461991 Zfand5        | NM_009551    | 0.00334685   | 1.14308 | E15.5 * Wnt1 up vs E15.5 * Ctrl |
| 10437594 Usp7          | NM_001003918 | 0.00318519   | 1.14301 | E15.5 * Wnt1 up vs E15.5 * Ctrl |
| 10355844 Dnpep         | NM_001110831 | 0.0143886    | 1.14284 | E15.5 * Wnt1 up vs E15.5 * Ctrl |
| 10547471 B4galnt3      | NM_198884    | 0.0102697    | 1.14248 | E15.5 * Wnt1 up vs E15.5 * Ctrl |
| 10531488 Ccni          | NM_017367    | 0.00979231   | 1.142   | E15.5 * Wnt1 up vs E15.5 * Ctrl |
| 10560091 V1rk1         | NM_134227    | 0.00376802   | 1.14195 | E15.5 * Wnt1 up vs E15.5 * Ctrl |
| 10385686 Hnrnpab       | NM_001048061 | 0.000207344  | 1.14116 | E15.5 * Wnt1 up vs E15.5 * Ctrl |
| 10391750 Gpatch8       | NM_001159492 | 0.00229742   | 1.14055 | E15.5 * Wnt1 up vs E15.5 * Ctrl |
| 10516706 Khdrbs1       | NM_011317    | 0.00454875   | 1.14045 | E15.5 * Wnt1 up vs E15.5 * Ctrl |
| 10360248 Atp1a4        | NM_013734    | 0.0138386    | 1.14026 | E15.5 * Wnt1 up vs E15.5 * Ctrl |
| 10440911               | ---          | 0.00598872   | 1.1401  | E15.5 * Wnt1 up vs E15.5 * Ctrl |
| 10485514 Caprin1       | NM_016739    | 6.53165e-005 | 1.14001 | E15.5 * Wnt1 up vs E15.5 * Ctrl |
| 10456120 Csnk1a1       | NM_146087    | 0.000769848  | 1.14001 | E15.5 * Wnt1 up vs E15.5 * Ctrl |
| 10479765 Suv39h2       | NM_022724    | 0.011224     | 1.13958 | E15.5 * Wnt1 up vs E15.5 * Ctrl |
| 10576924 Arglu1        | NM_176849    | 0.000645099  | 1.13958 | E15.5 * Wnt1 up vs E15.5 * Ctrl |
| 10477460               | ---          | 0.0133306    | 1.13919 | E15.5 * Wnt1 up vs E15.5 * Ctrl |
| 10517005 Gpr3          | NM_008154    | 0.00695275   | 1.13909 | E15.5 * Wnt1 up vs E15.5 * Ctrl |
| 10492442               | ---          | 0.00566648   | 1.13895 | E15.5 * Wnt1 up vs E15.5 * Ctrl |
| 10604473 Igsf1         | NM_177591    | 0.00605003   | 1.13852 | E15.5 * Wnt1 up vs E15.5 * Ctrl |
| 10424573 Khdrbs3       | AF079763     | 0.0125124    | 1.13804 | E15.5 * Wnt1 up vs E15.5 * Ctrl |
| 10509463 Eif4g3        | NM_172703    | 0.00835279   | 1.13773 | E15.5 * Wnt1 up vs E15.5 * Ctrl |
| 10514668 Jak1          | NM_146145    | 0.00161921   | 1.13744 | E15.5 * Wnt1 up vs E15.5 * Ctrl |
| 10526792 0910001L09Rik | NM_001081108 | 0.0146639    | 1.13728 | E15.5 * Wnt1 up vs E15.5 * Ctrl |
| 10458046 D0H4S114      | NM_053078    | 0.00509196   | 1.137   | E15.5 * Wnt1 up vs E15.5 * Ctrl |
| 10429199               | ---          | 0.0147936    | 1.13668 | E15.5 * Wnt1 up vs E15.5 * Ctrl |
| 10350046 Kdm5b         | NM_152895    | 0.00280733   | 1.13662 | E15.5 * Wnt1 up vs E15.5 * Ctrl |
| 10475879 Gm355         | ENSMUST00000 | 0.00399937   | 1.13659 | E15.5 * Wnt1 up vs E15.5 * Ctrl |
| 10528340 Dnajc2        | NM_009584    | 0.00908819   | 1.13652 | E15.5 * Wnt1 up vs E15.5 * Ctrl |
| 10452867 Dpy30         | NM_001146222 | 0.00220201   | 1.13651 | E15.5 * Wnt1 up vs E15.5 * Ctrl |
| 10551741 Dpf1          | NM_013874    | 0.00953055   | 1.1361  | E15.5 * Wnt1 up vs E15.5 * Ctrl |
| 10408490 Exoc2         | NM_025588    | 0.00394942   | 1.13607 | E15.5 * Wnt1 up vs E15.5 * Ctrl |
| 10564231 Ube2nl        | XM_905142    | 0.00933811   | 1.13584 | E15.5 * Wnt1 up vs E15.5 * Ctrl |
| 10548606 Tas2r107      | NM_199154    | 0.00633349   | 1.13571 | E15.5 * Wnt1 up vs E15.5 * Ctrl |
| 10347491 Wnt6          | NM_009526    | 0.00839205   | 1.13551 | E15.5 * Wnt1 up vs E15.5 * Ctrl |
| 10359201 Ralgps2       | NM_023884    | 0.00269146   | 1.13546 | E15.5 * Wnt1 up vs E15.5 * Ctrl |
| 10425757 1500032L24Rik | BC092006     | 0.013883     | 1.13526 | E15.5 * Wnt1 up vs E15.5 * Ctrl |
| 10379028               | ---          | 0.00651798   | 1.13511 | E15.5 * Wnt1 up vs E15.5 * Ctrl |
| 10485402 Fjx1          | NM_010218    | 0.00719771   | 1.13479 | E15.5 * Wnt1 up vs E15.5 * Ctrl |
| 10520124 Sumo2         | NM_133354    | 0.00610482   | 1.13447 | E15.5 * Wnt1 up vs E15.5 * Ctrl |
| 10374621 Ahsa2         | NM_172391    | 0.00640682   | 1.13433 | E15.5 * Wnt1 up vs E15.5 * Ctrl |
| 10405163 Spin1         | NM_146043    | 0.00135192   | 1.13426 | E15.5 * Wnt1 up vs E15.5 * Ctrl |
| 10537078 Mklm1         | NM_013791    | 0.0112813    | 1.13416 | E15.5 * Wnt1 up vs E15.5 * Ctrl |
| 10361712 Shprh         | NM_172937    | 0.0136792    | 1.13407 | E15.5 * Wnt1 up vs E15.5 * Ctrl |
| 10364718 1600002K03Rik | NM_027207    | 0.0117339    | 1.13402 | E15.5 * Wnt1 up vs E15.5 * Ctrl |
| 10581311 Acd           | NM_001012638 | 0.0131974    | 1.13373 | E15.5 * Wnt1 up vs E15.5 * Ctrl |
| 10490370 Psma7         | NM_011969    | 3.48531e-005 | 1.13372 | E15.5 * Wnt1 up vs E15.5 * Ctrl |
| 10575021 Zfp90         | NM_011764    | 0.000676264  | 1.13349 | E15.5 * Wnt1 up vs E15.5 * Ctrl |
| 10545212 ENSMUSG00000  | ENSMUST00000 | 0.00873747   | 1.13346 | E15.5 * Wnt1 up vs E15.5 * Ctrl |
| 10405948 BC048507      | NM_001001185 | 0.0102676    | 1.13345 | E15.5 * Wnt1 up vs E15.5 * Ctrl |
| 10496475 Adh5          | NM_007410    | 0.000211734  | 1.13339 | E15.5 * Wnt1 up vs E15.5 * Ctrl |
| 10394358 BC068281      | NM_173416    | 0.013045     | 1.13318 | E15.5 * Wnt1 up vs E15.5 * Ctrl |
| 10438454 Sumo2         | NM_133354    | 0.000168981  | 1.13307 | E15.5 * Wnt1 up vs E15.5 * Ctrl |
| 10382795 OTTMUSG00000  | XR_034731    | 0.0139803    | 1.13295 | E15.5 * Wnt1 up vs E15.5 * Ctrl |
| 10542445 Strap         | NM_011499    | 0.00189623   | 1.13213 | E15.5 * Wnt1 up vs E15.5 * Ctrl |
| 10353219 Sumo2         | NM_133354    | 0.000601315  | 1.13157 | E15.5 * Wnt1 up vs E15.5 * Ctrl |
| 10525313 Atxn2         | NM_009125    | 0.00144332   | 1.13133 | E15.5 * Wnt1 up vs E15.5 * Ctrl |
| 10532133 Evi5          | NM_007964    | 0.0105021    | 1.13132 | E15.5 * Wnt1 up vs E15.5 * Ctrl |
| 10555425 Fam168a       | BC079886     | 0.00561424   | 1.13128 | E15.5 * Wnt1 up vs E15.5 * Ctrl |
| 10494839 Csde1         | NM_144901    | 0.00328098   | 1.13127 | E15.5 * Wnt1 up vs E15.5 * Ctrl |
| 10426110 Pim3          | NM_145478    | 0.00702715   | 1.13114 | E15.5 * Wnt1 up vs E15.5 * Ctrl |

|          |               |              |              |         |                                 |
|----------|---------------|--------------|--------------|---------|---------------------------------|
| 10413270 | 4933413J09Rik | ENSMUST00000 | 0.0147564    | 1.13071 | E15.5 * Wnt1 up vs E15.5 * Ctrl |
| 10589848 | Ubp1          | NM_001083319 | 0.00664903   | 1.13065 | E15.5 * Wnt1 up vs E15.5 * Ctrl |
| 10548612 | Tas2r105      | NM_020501    | 0.00809945   | 1.13065 | E15.5 * Wnt1 up vs E15.5 * Ctrl |
| 10558257 | Gpr26         | NM_173410    | 0.00757999   | 1.13025 | E15.5 * Wnt1 up vs E15.5 * Ctrl |
| 10544976 | Kbtbd2        | NM_145958    | 0.0017555    | 1.13013 | E15.5 * Wnt1 up vs E15.5 * Ctrl |
| 10475625 | Eid1          | NM_025613    | 0.0058049    | 1.12975 | E15.5 * Wnt1 up vs E15.5 * Ctrl |
| 10493758 | Gatad2b       | NM_139304    | 0.00124505   | 1.12906 | E15.5 * Wnt1 up vs E15.5 * Ctrl |
| 10484351 | Sumo2         | NM_133354    | 0.000186125  | 1.12856 | E15.5 * Wnt1 up vs E15.5 * Ctrl |
| 10369661 | Ccar1         | NM_026201    | 0.0128546    | 1.12845 | E15.5 * Wnt1 up vs E15.5 * Ctrl |
| 10602795 | Eif1ay        | NM_025437    | 0.00671847   | 1.12779 | E15.5 * Wnt1 up vs E15.5 * Ctrl |
| 10520025 | Psmc2         | NM_011188    | 0.001646     | 1.12754 | E15.5 * Wnt1 up vs E15.5 * Ctrl |
| 10526069 | Cct6a         | NM_009838    | 0.00918492   | 1.12739 | E15.5 * Wnt1 up vs E15.5 * Ctrl |
| 10417676 | Thoc7         | NM_025435    | 0.0128565    | 1.12709 | E15.5 * Wnt1 up vs E15.5 * Ctrl |
| 10350286 | Ddx59         | NM_026500    | 0.0107052    | 1.12708 | E15.5 * Wnt1 up vs E15.5 * Ctrl |
| 10360679 | H3f3a         | NM_008210    | 0.000381445  | 1.12701 | E15.5 * Wnt1 up vs E15.5 * Ctrl |
| 10403112 | Dnahc11       | NM_010060    | 0.00688142   | 1.12636 | E15.5 * Wnt1 up vs E15.5 * Ctrl |
| 10549873 | ---           | ---          | 0.0130311    | 1.12633 | E15.5 * Wnt1 up vs E15.5 * Ctrl |
| 10572743 | Olfr373       | NM_146539    | 0.00886099   | 1.12533 | E15.5 * Wnt1 up vs E15.5 * Ctrl |
| 10563770 | Csrp3         | NM_013808    | 0.00953486   | 1.12515 | E15.5 * Wnt1 up vs E15.5 * Ctrl |
| 10588903 | Usp4          | NM_011678    | 0.00938265   | 1.12487 | E15.5 * Wnt1 up vs E15.5 * Ctrl |
| 10478196 | Top1          | NM_009408    | 0.00200038   | 1.12465 | E15.5 * Wnt1 up vs E15.5 * Ctrl |
| 10548931 | Slc15a5       | NM_177787    | 0.00977852   | 1.12454 | E15.5 * Wnt1 up vs E15.5 * Ctrl |
| 10367477 | Olfr774       | NM_207620    | 0.00159517   | 1.12451 | E15.5 * Wnt1 up vs E15.5 * Ctrl |
| 10442134 | Vmn2r107      | NM_001104569 | 0.00488891   | 1.12321 | E15.5 * Wnt1 up vs E15.5 * Ctrl |
| 10385557 | Cnot6         | NM_212484    | 0.0144735    | 1.12301 | E15.5 * Wnt1 up vs E15.5 * Ctrl |
| 10376263 | Mfap3         | NM_145426    | 0.0105759    | 1.12255 | E15.5 * Wnt1 up vs E15.5 * Ctrl |
| 10431371 | Hdac10        | NM_199198    | 0.0121315    | 1.12238 | E15.5 * Wnt1 up vs E15.5 * Ctrl |
| 10405539 | Txndc15       | NM_175150    | 0.0119926    | 1.12233 | E15.5 * Wnt1 up vs E15.5 * Ctrl |
| 10447431 | Foxn2         | NM_180974    | 0.0134366    | 1.12201 | E15.5 * Wnt1 up vs E15.5 * Ctrl |
| 10348004 | Psmd1         | NM_027357    | 0.000935208  | 1.12089 | E15.5 * Wnt1 up vs E15.5 * Ctrl |
| 10605919 | Pja1          | NM_001083110 | 0.00545207   | 1.12067 | E15.5 * Wnt1 up vs E15.5 * Ctrl |
| 10404464 | Serpinb9f     | NM_183197    | 0.00579274   | 1.12064 | E15.5 * Wnt1 up vs E15.5 * Ctrl |
| 10566966 | Eif4g2        | NM_013507    | 0.00163152   | 1.12034 | E15.5 * Wnt1 up vs E15.5 * Ctrl |
| 10502537 | Sh3glb1       | NM_019464    | 0.00418839   | 1.11993 | E15.5 * Wnt1 up vs E15.5 * Ctrl |
| 10519224 | Pusl1         | ENSMUST00000 | 0.00490014   | 1.11921 | E15.5 * Wnt1 up vs E15.5 * Ctrl |
| 10391990 | 1700081L11Rik | NM_001081045 | 0.00762164   | 1.11894 | E15.5 * Wnt1 up vs E15.5 * Ctrl |
| 10411776 | H3f3a         | NM_008210    | 1.46466e-005 | 1.11782 | E15.5 * Wnt1 up vs E15.5 * Ctrl |
| 10504056 | Ubp1          | NM_023305    | 0.012679     | 1.1178  | E15.5 * Wnt1 up vs E15.5 * Ctrl |
| 10578981 | ---           | ---          | 0.00950968   | 1.11758 | E15.5 * Wnt1 up vs E15.5 * Ctrl |
| 10551009 | Tmsb10        | NM_025284    | 0.000738116  | 1.11731 | E15.5 * Wnt1 up vs E15.5 * Ctrl |
| 10384603 | Mdh1          | NM_008618    | 0.010762     | 1.11707 | E15.5 * Wnt1 up vs E15.5 * Ctrl |
| 10395910 | Pnn           | NM_008891    | 0.00488861   | 1.11657 | E15.5 * Wnt1 up vs E15.5 * Ctrl |
| 10537805 | Olfr447       | NM_146988    | 0.0125284    | 1.11656 | E15.5 * Wnt1 up vs E15.5 * Ctrl |
| 10427885 | Hnrnpa1       | NM_010447    | 0.00871294   | 1.11494 | E15.5 * Wnt1 up vs E15.5 * Ctrl |
| 10538318 | Tax1bp1       | NM_025816    | 0.0132556    | 1.11422 | E15.5 * Wnt1 up vs E15.5 * Ctrl |
| 10377851 | Psmb6         | NM_008946    | 0.00857242   | 1.11311 | E15.5 * Wnt1 up vs E15.5 * Ctrl |
| 10398461 | Ppp2r5c       | NM_012023    | 0.00743728   | 1.11262 | E15.5 * Wnt1 up vs E15.5 * Ctrl |
| 10440600 | Cct8          | NM_009840    | 0.00456947   | 1.11225 | E15.5 * Wnt1 up vs E15.5 * Ctrl |
| 10473503 | Olfr1052      | NM_147010    | 0.0126338    | 1.11191 | E15.5 * Wnt1 up vs E15.5 * Ctrl |
| 10518642 | Ube4b         | NM_022022    | 0.0119344    | 1.11168 | E15.5 * Wnt1 up vs E15.5 * Ctrl |
| 10414313 | Ubb           | NM_011664    | 3.18724e-006 | 1.11132 | E15.5 * Wnt1 up vs E15.5 * Ctrl |
| 10376864 | Ubb           | NM_011664    | 5.1966e-006  | 1.11111 | E15.5 * Wnt1 up vs E15.5 * Ctrl |
| 10392947 | Sumo2         | NM_133354    | 0.000584734  | 1.11104 | E15.5 * Wnt1 up vs E15.5 * Ctrl |
| 10380321 | Mbtd1         | NM_134012    | 0.013271     | 1.10965 | E15.5 * Wnt1 up vs E15.5 * Ctrl |
| 10461191 | Nxf1          | NM_016813    | 0.00746136   | 1.10884 | E15.5 * Wnt1 up vs E15.5 * Ctrl |
| 10369704 | Hnrnp3        | NM_001079824 | 0.00830587   | 1.10879 | E15.5 * Wnt1 up vs E15.5 * Ctrl |
| 10586816 | Sltm          | NM_025690    | 0.0107044    | 1.10862 | E15.5 * Wnt1 up vs E15.5 * Ctrl |
| 10596769 | Rbm5          | NM_148930    | 0.00197061   | 1.10704 | E15.5 * Wnt1 up vs E15.5 * Ctrl |
| 10477073 | Csnk2a1       | NM_007788    | 0.0126315    | 1.10703 | E15.5 * Wnt1 up vs E15.5 * Ctrl |
| 10368739 | Gtf3c6        | NM_026113    | 0.00219793   | 1.10632 | E15.5 * Wnt1 up vs E15.5 * Ctrl |
| 10470665 | Setx          | NM_198033    | 0.00409462   | 1.10522 | E15.5 * Wnt1 up vs E15.5 * Ctrl |
| 10437392 | Magmas        | NM_025571    | 0.00285119   | 1.10512 | E15.5 * Wnt1 up vs E15.5 * Ctrl |
| 10451110 | Hsp90ab1      | NM_008302    | 0.00125647   | 1.10453 | E15.5 * Wnt1 up vs E15.5 * Ctrl |
| 10577352 | Defb12        | NM_152802    | 0.00765294   | 1.10446 | E15.5 * Wnt1 up vs E15.5 * Ctrl |
| 10580370 | Dnaja2        | NM_019794    | 0.00207959   | 1.10415 | E15.5 * Wnt1 up vs E15.5 * Ctrl |
| 10597020 | Fbxw14        | NM_015793    | 0.00671246   | 1.10411 | E15.5 * Wnt1 up vs E15.5 * Ctrl |

|          |               |              |              |          |                                   |
|----------|---------------|--------------|--------------|----------|-----------------------------------|
| 10408947 | ENSMUSG00000  | ENSMUST00000 | 0.00745757   | 1.10406  | E15.5 * Wnt1 up vs E15.5 * Ctrl   |
| 10601857 | Ngfrap1       | NM_009750    | 0.000579284  | 1.10357  | E15.5 * Wnt1 up vs E15.5 * Ctrl   |
| 10399379 | Pgk1          | NM_008828    | 0.00294038   | 1.10279  | E15.5 * Wnt1 up vs E15.5 * Ctrl   |
| 10498313 | Pgk1          | NM_008828    | 0.00294038   | 1.10279  | E15.5 * Wnt1 up vs E15.5 * Ctrl   |
| 10516859 | Ythdf2        | NM_145393    | 0.00528258   | 1.10231  | E15.5 * Wnt1 up vs E15.5 * Ctrl   |
| 10365384 | Rfx4          | NM_001024918 | 0.0126694    | 1.10109  | E15.5 * Wnt1 up vs E15.5 * Ctrl   |
| 10545479 | Tmsb10        | NM_025284    | 0.000371765  | 1.10009  | E15.5 * Wnt1 up vs E15.5 * Ctrl   |
| 10588547 | Vprbp         | NM_001015507 | 0.00911085   | 1.09903  | E15.5 * Wnt1 up vs E15.5 * Ctrl   |
| 10508217 | Sfpq          | NM_023603    | 0.000271429  | 1.09894  | E15.5 * Wnt1 up vs E15.5 * Ctrl   |
| 10601390 | Pgk1          | NM_008828    | 0.00501627   | 1.09725  | E15.5 * Wnt1 up vs E15.5 * Ctrl   |
| 10407809 | Gpr137b       | ENSMUST00000 | 0.00623385   | 1.09524  | E15.5 * Wnt1 up vs E15.5 * Ctrl   |
| 10528021 | Hspa8         | NM_031165    | 0.00856769   | 1.09516  | E15.5 * Wnt1 up vs E15.5 * Ctrl   |
| 10522716 | Polr2b        | NM_153798    | 0.00797204   | 1.09017  | E15.5 * Wnt1 up vs E15.5 * Ctrl   |
| 10393395 | Sfrs2         | NM_011358    | 0.00698708   | 1.08923  | E15.5 * Wnt1 up vs E15.5 * Ctrl   |
| 10507011 | Dmrta2        | NM_172296    | 0.00840205   | 1.08769  | E15.5 * Wnt1 up vs E15.5 * Ctrl   |
| 10432527 | Lass5         | NM_028015    | 0.000165169  | 1.08459  | E15.5 * Wnt1 up vs E15.5 * Ctrl   |
| 10386850 | Ncor1         | NM_011308    | 0.0132276    | 1.0817   | E15.5 * Wnt1 up vs E15.5 * Ctrl   |
| 10452415 | Gapdh         | M32599       | 0.0148027    | 1.08036  | E15.5 * Wnt1 up vs E15.5 * Ctrl   |
| 10465649 | Mark2         | NM_007928    | 0.00455004   | 1.0743   | E15.5 * Wnt1 up vs E15.5 * Ctrl   |
| 10555055 | Ndufc2        | NM_024220    | 0.00720302   | 1.07396  | E15.5 * Wnt1 up vs E15.5 * Ctrl   |
| 10375735 | Hnrnp1        | NM_021510    | 0.00394302   | 1.07334  | E15.5 * Wnt1 up vs E15.5 * Ctrl   |
| 10447699 | 6530411M01Rik | ENSMUST00000 | 0.00758495   | 1.07237  | E15.5 * Wnt1 up vs E15.5 * Ctrl   |
| 10422161 | Gapdh         | M32599       | 0.00282665   | 1.07171  | E15.5 * Wnt1 up vs E15.5 * Ctrl   |
| 10466139 | 1700017D01Rik | NM_027058    | 0.00887871   | 1.06754  | E15.5 * Wnt1 up vs E15.5 * Ctrl   |
| 10496379 | H2afz         | NM_016750    | 0.0137902    | 1.0659   | E15.5 * Wnt1 up vs E15.5 * Ctrl   |
| 10380210 | Sfrs1         | NM_173374    | 0.00828544   | 1.06435  | E15.5 * Wnt1 up vs E15.5 * Ctrl   |
| 10503150 | Rab2a         | NM_021518    | 0.0116521    | 1.0607   | E15.5 * Wnt1 up vs E15.5 * Ctrl   |
| 10579769 | Gapdh         | M32599       | 0.00821726   | 1.06038  | E15.5 * Wnt1 up vs E15.5 * Ctrl   |
| 10548143 | Gapdh         | BC092267     | 0.0067573    | 1.05834  | E15.5 * Wnt1 up vs E15.5 * Ctrl   |
| 10528167 | Gapdh         | NM_008084    | 0.007999     | 1.05692  | E15.5 * Wnt1 up vs E15.5 * Ctrl   |
| 10427241 | Pcbp2         | NM_001103165 | 0.00889457   | 1.05419  | E15.5 * Wnt1 up vs E15.5 * Ctrl   |
| 10489049 | Rpl9          | NM_011292    | 0.00116514   | -1.05024 | E15.5 * Wnt1 down vs E15.5 * Ctrl |
| 10565582 | Rps8          | NM_009098    | 0.0139018    | -1.05224 | E15.5 * Wnt1 down vs E15.5 * Ctrl |
| 10561138 | Rpl37a        | NM_009084    | 0.0134441    | -1.05242 | E15.5 * Wnt1 down vs E15.5 * Ctrl |
| 10513195 | Txn1          | NM_011660    | 0.0135834    | -1.05985 | E15.5 * Wnt1 down vs E15.5 * Ctrl |
| 10472686 | Rpl9          | NM_011292    | 0.00476168   | -1.06242 | E15.5 * Wnt1 down vs E15.5 * Ctrl |
| 10423228 | 5730427N09Rik | NM_021552    | 0.00666565   | -1.06325 | E15.5 * Wnt1 down vs E15.5 * Ctrl |
| 10355173 | Rpl10a        | NM_011287    | 0.00241499   | -1.06399 | E15.5 * Wnt1 down vs E15.5 * Ctrl |
| 10443360 | Rpl10a        | NM_011287    | 0.00481423   | -1.06559 | E15.5 * Wnt1 down vs E15.5 * Ctrl |
| 10389162 | Rpl12         | NM_009076    | 0.00583442   | -1.06622 | E15.5 * Wnt1 down vs E15.5 * Ctrl |
| 10449549 | Rpl35a        | BC090255     | 0.00543737   | -1.06647 | E15.5 * Wnt1 down vs E15.5 * Ctrl |
| 10485685 | Rpl35a        | BC090255     | 0.00543737   | -1.06647 | E15.5 * Wnt1 down vs E15.5 * Ctrl |
| 10533626 | Rpl35a        | BC090255     | 0.00543737   | -1.06647 | E15.5 * Wnt1 down vs E15.5 * Ctrl |
| 10538080 | Rpl35a        | BC090255     | 0.00543737   | -1.06647 | E15.5 * Wnt1 down vs E15.5 * Ctrl |
| 10437627 | Rpl35a        | BC090255     | 0.00299887   | -1.067   | E15.5 * Wnt1 down vs E15.5 * Ctrl |
| 10521036 | Rpl35a        | BC090255     | 0.0110219    | -1.06774 | E15.5 * Wnt1 down vs E15.5 * Ctrl |
| 10410506 | Rpl9          | NM_011292    | 0.000906852  | -1.06779 | E15.5 * Wnt1 down vs E15.5 * Ctrl |
| 10515154 | Rpl3          | NM_013762    | 0.00701339   | -1.06885 | E15.5 * Wnt1 down vs E15.5 * Ctrl |
| 10479362 | Rps21         | NM_025587    | 0.00745092   | -1.06936 | E15.5 * Wnt1 down vs E15.5 * Ctrl |
| 10538629 | Rps15         | NM_009091    | 0.0145587    | -1.07042 | E15.5 * Wnt1 down vs E15.5 * Ctrl |
| 10530194 | Rpl9          | NM_011292    | 0.000935457  | -1.07159 | E15.5 * Wnt1 down vs E15.5 * Ctrl |
| 10576246 | Rps12         | NM_011295    | 0.00657696   | -1.0723  | E15.5 * Wnt1 down vs E15.5 * Ctrl |
| 10416925 | ---           | ---          | 0.00187151   | -1.07431 | E15.5 * Wnt1 down vs E15.5 * Ctrl |
| 10439402 | Rpl9          | NM_011292    | 0.00225221   | -1.07467 | E15.5 * Wnt1 down vs E15.5 * Ctrl |
| 10409968 | Rps18         | NM_011296    | 0.000967167  | -1.07549 | E15.5 * Wnt1 down vs E15.5 * Ctrl |
| 10594320 | ENSMUSG00000  | NR_003965    | 0.00681532   | -1.07675 | E15.5 * Wnt1 down vs E15.5 * Ctrl |
| 10435187 | Rpl35a        | NM_021338    | 0.00924367   | -1.07693 | E15.5 * Wnt1 down vs E15.5 * Ctrl |
| 10360737 | Rpl35a        | NM_021338    | 0.00854087   | -1.07844 | E15.5 * Wnt1 down vs E15.5 * Ctrl |
| 10405890 | Rpl9          | NM_011292    | 0.000754154  | -1.07937 | E15.5 * Wnt1 down vs E15.5 * Ctrl |
| 10404354 | Rps18         | NM_011296    | 0.000151635  | -1.07968 | E15.5 * Wnt1 down vs E15.5 * Ctrl |
| 10581535 | Rps18         | NM_011296    | 4.27727e-005 | -1.08314 | E15.5 * Wnt1 down vs E15.5 * Ctrl |
| 10368504 | Rpl12         | NM_009076    | 0.00291135   | -1.08519 | E15.5 * Wnt1 down vs E15.5 * Ctrl |
| 10380297 | Cox11         | NM_199008    | 0.0142372    | -1.08537 | E15.5 * Wnt1 down vs E15.5 * Ctrl |
| 10556200 | Rpl27a        | NM_011975    | 0.0130363    | -1.08667 | E15.5 * Wnt1 down vs E15.5 * Ctrl |
| 10419136 | Cdv3          | NM_175565    | 0.00388084   | -1.08691 | E15.5 * Wnt1 down vs E15.5 * Ctrl |
| 10488231 | EG620248      | ENSMUST00000 | 0.0128511    | -1.08727 | E15.5 * Wnt1 down vs E15.5 * Ctrl |

|                        |              |              |          |                                   |
|------------------------|--------------|--------------|----------|-----------------------------------|
| 10464388 Rps12         | NM_011295    | 0.00318655   | -1.08731 | E15.5 * Wnt1 down vs E15.5 * Ctrl |
| 10561956 Rps12         | NM_011295    | 0.00328465   | -1.08754 | E15.5 * Wnt1 down vs E15.5 * Ctrl |
| 10352514 Eprs          | NM_029735    | 0.00690211   | -1.08795 | E15.5 * Wnt1 down vs E15.5 * Ctrl |
| 10496032 Rpl12         | NM_009076    | 0.00107297   | -1.08853 | E15.5 * Wnt1 down vs E15.5 * Ctrl |
| 10545471 Kcmf1         | NM_019715    | 0.000730075  | -1.08898 | E15.5 * Wnt1 down vs E15.5 * Ctrl |
| 10411393 Rps18         | NM_011296    | 9.54736e-005 | -1.0897  | E15.5 * Wnt1 down vs E15.5 * Ctrl |
| 10489186 Rpl35a        | NM_021338    | 0.0111599    | -1.09072 | E15.5 * Wnt1 down vs E15.5 * Ctrl |
| 10450063 Rps18         | NM_011296    | 2.29828e-005 | -1.09102 | E15.5 * Wnt1 down vs E15.5 * Ctrl |
| 10368270 Rps12         | NM_011295    | 0.00638303   | -1.09208 | E15.5 * Wnt1 down vs E15.5 * Ctrl |
| 10550601 Snrpd2        | NM_026943    | 0.0124672    | -1.09215 | E15.5 * Wnt1 down vs E15.5 * Ctrl |
| 10438376 EG620248      | ENSMUST00000 | 0.0101446    | -1.09216 | E15.5 * Wnt1 down vs E15.5 * Ctrl |
| 10409424 Mxd3          | NM_016662    | 0.00573834   | -1.09353 | E15.5 * Wnt1 down vs E15.5 * Ctrl |
| 10516209 Rps2          | NM_008503    | 0.0136648    | -1.09354 | E15.5 * Wnt1 down vs E15.5 * Ctrl |
| 10380732 Mrpl10        | NM_026154    | 0.00685518   | -1.09385 | E15.5 * Wnt1 down vs E15.5 * Ctrl |
| 10600324 Rpl3          | NM_013762    | 0.000867283  | -1.09444 | E15.5 * Wnt1 down vs E15.5 * Ctrl |
| 10515383 Rpl36         | NM_018730    | 0.00433154   | -1.09539 | E15.5 * Wnt1 down vs E15.5 * Ctrl |
| 10513878 Rps18         | NM_011296    | 0.0010755    | -1.09596 | E15.5 * Wnt1 down vs E15.5 * Ctrl |
| 10591773 Hmgn2         | NM_016957    | 0.00305633   | -1.09654 | E15.5 * Wnt1 down vs E15.5 * Ctrl |
| 10556764 Ppp1cc        | NM_013636    | 0.00464427   | -1.09665 | E15.5 * Wnt1 down vs E15.5 * Ctrl |
| 10390352 Kpnbl         | NM_008379    | 0.00989299   | -1.09693 | E15.5 * Wnt1 down vs E15.5 * Ctrl |
| 10503723 Mdn1          | NM_001081392 | 0.0107853    | -1.09829 | E15.5 * Wnt1 down vs E15.5 * Ctrl |
| 10525352 Ppp1cc        | NM_013636    | 0.00295343   | -1.09863 | E15.5 * Wnt1 down vs E15.5 * Ctrl |
| 10568417 1110007A13Rik | BC038342     | 0.0111104    | -1.09889 | E15.5 * Wnt1 down vs E15.5 * Ctrl |
| 10372750 Cand1         | NM_027994    | 0.00712536   | -1.09921 | E15.5 * Wnt1 down vs E15.5 * Ctrl |
| 10467256 Rpl10         | NM_052835    | 0.0013979    | -1.10312 | E15.5 * Wnt1 down vs E15.5 * Ctrl |
| 10411363 5730427N09Rik | NM_021552    | 0.000113757  | -1.10418 | E15.5 * Wnt1 down vs E15.5 * Ctrl |
| 10593320 Rpl10         | NM_052835    | 0.000533632  | -1.1049  | E15.5 * Wnt1 down vs E15.5 * Ctrl |
| 10466342 Olfr1453      | NM_146700    | 0.0106474    | -1.10504 | E15.5 * Wnt1 down vs E15.5 * Ctrl |
| 10526319 Baz1b         | NM_011714    | 0.00146062   | -1.10813 | E15.5 * Wnt1 down vs E15.5 * Ctrl |
| 10368670 Amd1          | NM_009665    | 0.00868468   | -1.10882 | E15.5 * Wnt1 down vs E15.5 * Ctrl |
| 10352756 Lpgat1        | NM_001134829 | 0.00894357   | -1.1094  | E15.5 * Wnt1 down vs E15.5 * Ctrl |
| 10579659 Hmgn2         | NM_016957    | 0.00160634   | -1.11013 | E15.5 * Wnt1 down vs E15.5 * Ctrl |
| 10517141 Hmgn2         | NM_016957    | 0.000987177  | -1.11021 | E15.5 * Wnt1 down vs E15.5 * Ctrl |
| 10551489 Rps16         | NM_013647    | 0.0107973    | -1.11077 | E15.5 * Wnt1 down vs E15.5 * Ctrl |
| 10471358 Rpl36         | NM_018730    | 0.00117628   | -1.11079 | E15.5 * Wnt1 down vs E15.5 * Ctrl |
| 10437222 Hnrnpa3       | NM_053263    | 0.00501459   | -1.11102 | E15.5 * Wnt1 down vs E15.5 * Ctrl |
| 10543895 2010107G12Rik | BC075651     | 0.00875208   | -1.11111 | E15.5 * Wnt1 down vs E15.5 * Ctrl |
| 10552740 Nup62         | NM_053074    | 0.00777144   | -1.11171 | E15.5 * Wnt1 down vs E15.5 * Ctrl |
| 10528200 Hnrnpa3       | ENSMUST00000 | 0.00380456   | -1.11177 | E15.5 * Wnt1 down vs E15.5 * Ctrl |
| 10594946 Rpl36         | NM_018730    | 0.00076325   | -1.11258 | E15.5 * Wnt1 down vs E15.5 * Ctrl |
| 10349478 Rpl28         | NM_009081    | 0.00314087   | -1.11266 | E15.5 * Wnt1 down vs E15.5 * Ctrl |
| 10541581 Clec4b1       | NM_027218    | 0.00543473   | -1.11317 | E15.5 * Wnt1 down vs E15.5 * Ctrl |
| 10367073 Snrpd2        | NM_026943    | 0.0107699    | -1.11333 | E15.5 * Wnt1 down vs E15.5 * Ctrl |
| 10515493 Rhoa          | NM_016802    | 0.011348     | -1.11346 | E15.5 * Wnt1 down vs E15.5 * Ctrl |
| 10347297 Arpc2         | NM_029711    | 0.00430571   | -1.11386 | E15.5 * Wnt1 down vs E15.5 * Ctrl |
| 10600349 Rpl10         | NM_052835    | 0.000636918  | -1.11391 | E15.5 * Wnt1 down vs E15.5 * Ctrl |
| 10537246 Nup205        | NM_027513    | 0.00704879   | -1.11412 | E15.5 * Wnt1 down vs E15.5 * Ctrl |
| 10416940 Tpm3          | ENSMUST00000 | 0.000853088  | -1.11431 | E15.5 * Wnt1 down vs E15.5 * Ctrl |
| 10378783 Rpl36         | NM_018730    | 0.000715974  | -1.11447 | E15.5 * Wnt1 down vs E15.5 * Ctrl |
| 10499716 Ubap2l        | NM_028475    | 0.00423482   | -1.11482 | E15.5 * Wnt1 down vs E15.5 * Ctrl |
| 10538963 Rpl34         | NM_026724    | 0.000986604  | -1.11508 | E15.5 * Wnt1 down vs E15.5 * Ctrl |
| 10458823               | ---          | 0.00223642   | -1.11569 | E15.5 * Wnt1 down vs E15.5 * Ctrl |
| 10403108 Hmgn2         | NM_016957    | 0.0106204    | -1.11585 | E15.5 * Wnt1 down vs E15.5 * Ctrl |
| 10430105 C030006K11Rik | NM_145472    | 0.00798999   | -1.1159  | E15.5 * Wnt1 down vs E15.5 * Ctrl |
| 10485654 Rpl10         | NM_052835    | 0.000859463  | -1.11617 | E15.5 * Wnt1 down vs E15.5 * Ctrl |
| 10413333 Dnahc12       | Z83811       | 0.0137876    | -1.11654 | E15.5 * Wnt1 down vs E15.5 * Ctrl |
| 10546801 Rpl36         | NM_018730    | 0.00022257   | -1.11704 | E15.5 * Wnt1 down vs E15.5 * Ctrl |
| 10549714 Rpl28         | NM_009081    | 0.00189304   | -1.11745 | E15.5 * Wnt1 down vs E15.5 * Ctrl |
| 10449370 Rps10         | NM_025963    | 0.00925919   | -1.11765 | E15.5 * Wnt1 down vs E15.5 * Ctrl |
| 10439766 Pvr13         | NM_021496    | 0.00752185   | -1.11805 | E15.5 * Wnt1 down vs E15.5 * Ctrl |
| 10514173 Rpl34         | NM_026724    | 0.000565016  | -1.11845 | E15.5 * Wnt1 down vs E15.5 * Ctrl |
| 10527832 Pds5b         | NM_175310    | 0.00510625   | -1.11863 | E15.5 * Wnt1 down vs E15.5 * Ctrl |
| 10535927 Nme2          | NM_008705    | 0.00100146   | -1.11865 | E15.5 * Wnt1 down vs E15.5 * Ctrl |
| 10494296 Rps10         | NM_025963    | 0.00945613   | -1.11919 | E15.5 * Wnt1 down vs E15.5 * Ctrl |
| 10584276 Sec61g        | NM_011343    | 0.00935109   | -1.11936 | E15.5 * Wnt1 down vs E15.5 * Ctrl |
| 10484402 Ctnnd1        | NM_007615    | 0.0023991    | -1.12005 | E15.5 * Wnt1 down vs E15.5 * Ctrl |

|          |               |              |             |          |                                   |
|----------|---------------|--------------|-------------|----------|-----------------------------------|
| 10518329 | Rpl28         | NM_009081    | 0.00733473  | -1.1204  | E15.5 * Wnt1 down vs E15.5 * Ctrl |
| 10565072 | Sec11a        | NM_019951    | 0.00985371  | -1.12166 | E15.5 * Wnt1 down vs E15.5 * Ctrl |
| 10590648 | Top2a         | NM_011623    | 0.0146766   | -1.12247 | E15.5 * Wnt1 down vs E15.5 * Ctrl |
| 10499655 | Il6ra         | NM_010559    | 0.0139276   | -1.12248 | E15.5 * Wnt1 down vs E15.5 * Ctrl |
| 10446131 | Rpl36         | NM_018730    | 0.000432556 | -1.12333 | E15.5 * Wnt1 down vs E15.5 * Ctrl |
| 10556350 | Usp47         | NM_133758    | 0.0073783   | -1.12369 | E15.5 * Wnt1 down vs E15.5 * Ctrl |
| 10566662 | Olfra469      | NM_146426    | 0.00452987  | -1.12373 | E15.5 * Wnt1 down vs E15.5 * Ctrl |
| 10462081 | 5730427N09Rik | NM_021552    | 0.000811824 | -1.12386 | E15.5 * Wnt1 down vs E15.5 * Ctrl |
| 10428912 | ---           | ---          | 0.00215059  | -1.1242  | E15.5 * Wnt1 down vs E15.5 * Ctrl |
| 10574694 | Elmo3         | NM_172760    | 0.000989688 | -1.12485 | E15.5 * Wnt1 down vs E15.5 * Ctrl |
| 10426648 | Rpl36         | NM_018730    | 0.000194442 | -1.12513 | E15.5 * Wnt1 down vs E15.5 * Ctrl |
| 10457223 | Cdh11         | NM_009866    | 0.00417716  | -1.1254  | E15.5 * Wnt1 down vs E15.5 * Ctrl |
| 10472587 | Rpl13         | NM_016738    | 0.00298624  | -1.12661 | E15.5 * Wnt1 down vs E15.5 * Ctrl |
| 10384448 | Sec61g        | NM_011343    | 0.00147718  | -1.12669 | E15.5 * Wnt1 down vs E15.5 * Ctrl |
| 10405971 | Nsun2         | NM_145354    | 0.00531277  | -1.12692 | E15.5 * Wnt1 down vs E15.5 * Ctrl |
| 10565846 | Spcs2         | NM_025668    | 0.0133444   | -1.12692 | E15.5 * Wnt1 down vs E15.5 * Ctrl |
| 10477604 | Itch          | NM_008395    | 0.0131513   | -1.12725 | E15.5 * Wnt1 down vs E15.5 * Ctrl |
| 10528177 | ENSMUSG00000  | NM_198666    | 0.0119009   | -1.12735 | E15.5 * Wnt1 down vs E15.5 * Ctrl |
| 10563527 | Ush1c         | NM_153677    | 0.00914524  | -1.12776 | E15.5 * Wnt1 down vs E15.5 * Ctrl |
| 10526179 | Rpl28         | NM_009081    | 0.00187485  | -1.12776 | E15.5 * Wnt1 down vs E15.5 * Ctrl |
| 10592138 | Rpl36         | NM_018730    | 0.00117103  | -1.12816 | E15.5 * Wnt1 down vs E15.5 * Ctrl |
| 10542129 | Clec2g        | NM_027562    | 0.00833086  | -1.12873 | E15.5 * Wnt1 down vs E15.5 * Ctrl |
| 10394609 | Rpl36         | NM_018730    | 0.00054596  | -1.12918 | E15.5 * Wnt1 down vs E15.5 * Ctrl |
| 10371482 | Hsp90b1       | NM_011631    | 0.00958919  | -1.12924 | E15.5 * Wnt1 down vs E15.5 * Ctrl |
| 10513381 | Rod1          | NM_144904    | 0.00240077  | -1.12994 | E15.5 * Wnt1 down vs E15.5 * Ctrl |
| 10606858 | Tceal8        | NM_025703    | 0.0136614   | -1.13003 | E15.5 * Wnt1 down vs E15.5 * Ctrl |
| 10375234 | Nudcd2        | NM_026023    | 0.00428198  | -1.1307  | E15.5 * Wnt1 down vs E15.5 * Ctrl |
| 10606195 | Rlim          | NM_011276    | 0.00805897  | -1.13087 | E15.5 * Wnt1 down vs E15.5 * Ctrl |
| 10486203 | Ino80         | NM_026574    | 0.00423446  | -1.13116 | E15.5 * Wnt1 down vs E15.5 * Ctrl |
| 10497964 | Pgrmc2        | NM_027558    | 0.002429    | -1.13161 | E15.5 * Wnt1 down vs E15.5 * Ctrl |
| 10397666 | Zc3h14        | NM_029334    | 0.00728488  | -1.1319  | E15.5 * Wnt1 down vs E15.5 * Ctrl |
| 10602840 | Sh3kbp1       | NM_021389    | 0.00152368  | -1.13217 | E15.5 * Wnt1 down vs E15.5 * Ctrl |
| 10428192 | Pabpc1        | NM_008774    | 0.000977309 | -1.13226 | E15.5 * Wnt1 down vs E15.5 * Ctrl |
| 10421456 | Xpo7          | NM_023045    | 0.00109433  | -1.13253 | E15.5 * Wnt1 down vs E15.5 * Ctrl |
| 10583485 | A230050P20Rik | NM_175687    | 0.00895958  | -1.1326  | E15.5 * Wnt1 down vs E15.5 * Ctrl |
| 10524018 | Rpl34         | NM_001005859 | 0.0011857   | -1.13287 | E15.5 * Wnt1 down vs E15.5 * Ctrl |
| 10597960 | Slc6a20a      | NM_139142    | 0.00745439  | -1.133   | E15.5 * Wnt1 down vs E15.5 * Ctrl |
| 10597920 | Zdhhc3        | NM_026917    | 0.00785575  | -1.13375 | E15.5 * Wnt1 down vs E15.5 * Ctrl |
| 10405094 | Iars          | NM_172015    | 0.00637549  | -1.13384 | E15.5 * Wnt1 down vs E15.5 * Ctrl |
| 10487629 | Idh3b         | NM_130884    | 0.00401589  | -1.13424 | E15.5 * Wnt1 down vs E15.5 * Ctrl |
| 10490203 | Gnas          | NM_010309    | 0.00607947  | -1.13488 | E15.5 * Wnt1 down vs E15.5 * Ctrl |
| 10596265 | ---           | ---          | 0.00834307  | -1.13549 | E15.5 * Wnt1 down vs E15.5 * Ctrl |
| 10444747 | ---           | ---          | 0.0145382   | -1.13549 | E15.5 * Wnt1 down vs E15.5 * Ctrl |
| 10565591 | OTTMUSG00000  | ENSMUST00000 | 0.0130474   | -1.13679 | E15.5 * Wnt1 down vs E15.5 * Ctrl |
| 10523547 | Agpat9        | NM_172715    | 0.00408264  | -1.13729 | E15.5 * Wnt1 down vs E15.5 * Ctrl |
| 10477325 | Dnmt3b        | NM_001003961 | 0.0117432   | -1.13762 | E15.5 * Wnt1 down vs E15.5 * Ctrl |
| 10576210 | Rpl13         | NM_016738    | 0.00424789  | -1.13817 | E15.5 * Wnt1 down vs E15.5 * Ctrl |
| 10439237 | Rps21         | NM_025587    | 0.0143967   | -1.13819 | E15.5 * Wnt1 down vs E15.5 * Ctrl |
| 10474399 | Bdnf          | NM_001048139 | 0.00706641  | -1.13845 | E15.5 * Wnt1 down vs E15.5 * Ctrl |
| 10518967 | 1190007F08Rik | ENSMUST00000 | 0.0135998   | -1.13892 | E15.5 * Wnt1 down vs E15.5 * Ctrl |
| 10530434 | Comm8         | NM_178599    | 0.0119887   | -1.13938 | E15.5 * Wnt1 down vs E15.5 * Ctrl |
| 10403951 | Hist1h2bp     | NM_178202    | 0.00883712  | -1.13965 | E15.5 * Wnt1 down vs E15.5 * Ctrl |
| 10577412 | 6820431F20Rik | BC025151     | 0.0064404   | -1.14002 | E15.5 * Wnt1 down vs E15.5 * Ctrl |
| 10429972 | Cpsf1         | NM_053193    | 0.00631608  | -1.14005 | E15.5 * Wnt1 down vs E15.5 * Ctrl |
| 10520952 | Ppp1cb        | NM_172707    | 0.000165156 | -1.14017 | E15.5 * Wnt1 down vs E15.5 * Ctrl |
| 10606746 | Nxf2          | NM_031259    | 0.0096454   | -1.14084 | E15.5 * Wnt1 down vs E15.5 * Ctrl |
| 10577070 | Tubgcp3       | NM_198031    | 0.0105157   | -1.14098 | E15.5 * Wnt1 down vs E15.5 * Ctrl |
| 10434523 | Polr2h        | NM_145632    | 0.00975296  | -1.14199 | E15.5 * Wnt1 down vs E15.5 * Ctrl |
| 10419471 | Tep1          | NM_009351    | 0.0059496   | -1.14218 | E15.5 * Wnt1 down vs E15.5 * Ctrl |
| 10506736 | Magoh         | NM_010760    | 0.0147141   | -1.14232 | E15.5 * Wnt1 down vs E15.5 * Ctrl |
| 10344741 | Hnrnpa3       | NM_053263    | 0.00126726  | -1.14263 | E15.5 * Wnt1 down vs E15.5 * Ctrl |
| 10515113 | Hnrnpa3       | NM_053263    | 0.00126726  | -1.14263 | E15.5 * Wnt1 down vs E15.5 * Ctrl |
| 10405234 | Snrpd2        | NM_026943    | 0.00404294  | -1.14308 | E15.5 * Wnt1 down vs E15.5 * Ctrl |
| 10479112 | Gnas          | NM_022000    | 0.00372795  | -1.14362 | E15.5 * Wnt1 down vs E15.5 * Ctrl |
| 10562368 | 4931406P16Rik | NM_172741    | 0.0132224   | -1.14377 | E15.5 * Wnt1 down vs E15.5 * Ctrl |
| 10435832 | Gm608         | NM_001029889 | 0.00734757  | -1.14388 | E15.5 * Wnt1 down vs E15.5 * Ctrl |

|                        |              |              |          |                                   |
|------------------------|--------------|--------------|----------|-----------------------------------|
| 10605729 Zfx           | NM_001044386 | 0.000612388  | -1.14433 | E15.5 * Wnt1 down vs E15.5 * Ctrl |
| 10503249 Rpl13         | NM_016738    | 0.00407072   | -1.14447 | E15.5 * Wnt1 down vs E15.5 * Ctrl |
| 10581505 Rpl10         | NM_052835    | 0.00101963   | -1.14448 | E15.5 * Wnt1 down vs E15.5 * Ctrl |
| 10563362 Sphk2         | NM_020011    | 0.00633756   | -1.14455 | E15.5 * Wnt1 down vs E15.5 * Ctrl |
| 10600150 Zfp275        | NM_031494    | 0.00914554   | -1.14463 | E15.5 * Wnt1 down vs E15.5 * Ctrl |
| 10432540 Lima1         | NM_001113545 | 0.00478819   | -1.14487 | E15.5 * Wnt1 down vs E15.5 * Ctrl |
| 10384192 Tbrg4         | NM_134011    | 0.00737332   | -1.14694 | E15.5 * Wnt1 down vs E15.5 * Ctrl |
| 10547820 Lrrc23        | NM_013588    | 0.0141324    | -1.14821 | E15.5 * Wnt1 down vs E15.5 * Ctrl |
| 10424250 Snrpd2        | NM_026943    | 0.00288456   | -1.1483  | E15.5 * Wnt1 down vs E15.5 * Ctrl |
| 10550501 Mill2         | NM_153761    | 0.0102403    | -1.1484  | E15.5 * Wnt1 down vs E15.5 * Ctrl |
| 10439790 Trat1         | NM_198297    | 0.00729991   | -1.14879 | E15.5 * Wnt1 down vs E15.5 * Ctrl |
| 10596379 Rpl10         | NM_052835    | 0.000202307  | -1.14919 | E15.5 * Wnt1 down vs E15.5 * Ctrl |
| 10548859 Wbp11         | NM_021714    | 0.0119948    | -1.1493  | E15.5 * Wnt1 down vs E15.5 * Ctrl |
| 10461402 Fth1          | NM_010239    | 1.58537e-005 | -1.14934 | E15.5 * Wnt1 down vs E15.5 * Ctrl |
| 10567229 Smg1          | NM_001031814 | 0.00519371   | -1.14955 | E15.5 * Wnt1 down vs E15.5 * Ctrl |
| 10363265 Lims1         | NM_026148    | 0.0046334    | -1.14966 | E15.5 * Wnt1 down vs E15.5 * Ctrl |
| 10518019 Ddi2          | NM_001017966 | 7.33819e-005 | -1.1499  | E15.5 * Wnt1 down vs E15.5 * Ctrl |
| 10528840 Paxip1        | NM_018878    | 0.009251     | -1.15019 | E15.5 * Wnt1 down vs E15.5 * Ctrl |
| 10414113 Wapal         | NM_001004436 | 0.00418654   | -1.15019 | E15.5 * Wnt1 down vs E15.5 * Ctrl |
| 10516640 Eif3i         | NM_018799    | 0.0120786    | -1.15031 | E15.5 * Wnt1 down vs E15.5 * Ctrl |
| 10403664 B3galnt2      | NM_178640    | 0.00877235   | -1.15077 | E15.5 * Wnt1 down vs E15.5 * Ctrl |
| 10558914 Rplp2         | NM_026020    | 0.0138372    | -1.15082 | E15.5 * Wnt1 down vs E15.5 * Ctrl |
| 10608263 Sly           | BC049626     | 0.0118005    | -1.15109 | E15.5 * Wnt1 down vs E15.5 * Ctrl |
| 10603708 Cask          | NM_009806    | 0.00254858   | -1.15169 | E15.5 * Wnt1 down vs E15.5 * Ctrl |
| 10496946 Zzz3          | NM_198416    | 0.00742782   | -1.15229 | E15.5 * Wnt1 down vs E15.5 * Ctrl |
| 10446693 Wdr43         | AK129031     | 0.00213994   | -1.15234 | E15.5 * Wnt1 down vs E15.5 * Ctrl |
| 10557587 Zfp771        | NM_177362    | 0.00468428   | -1.15263 | E15.5 * Wnt1 down vs E15.5 * Ctrl |
| 10371888 Tmpo          | NM_001080129 | 0.0134863    | -1.15347 | E15.5 * Wnt1 down vs E15.5 * Ctrl |
| 10382565 Mrps7         | NM_025305    | 0.00412573   | -1.15358 | E15.5 * Wnt1 down vs E15.5 * Ctrl |
| 10493052 Insrr         | NM_011832    | 0.0144639    | -1.15365 | E15.5 * Wnt1 down vs E15.5 * Ctrl |
| 10521174 Rnf4          | NM_011278    | 0.00814125   | -1.1539  | E15.5 * Wnt1 down vs E15.5 * Ctrl |
| 10542050 Efcab4b       | NM_001033464 | 0.012538     | -1.15448 | E15.5 * Wnt1 down vs E15.5 * Ctrl |
| 10495794 Pde5a         | NM_153422    | 0.0026069    | -1.15511 | E15.5 * Wnt1 down vs E15.5 * Ctrl |
| 10371002 Lsm7          | NM_025349    | 0.0131125    | -1.15522 | E15.5 * Wnt1 down vs E15.5 * Ctrl |
| 10594835 Grin1a        | NM_178602    | 0.00213884   | -1.15537 | E15.5 * Wnt1 down vs E15.5 * Ctrl |
| 10430811 Nhp2l1        | NM_011482    | 0.00913824   | -1.15573 | E15.5 * Wnt1 down vs E15.5 * Ctrl |
| 10441919 1600012H06Rik | NM_001083881 | 0.0128436    | -1.15625 | E15.5 * Wnt1 down vs E15.5 * Ctrl |
| 10561552 Eif3k         | NM_028659    | 0.00929847   | -1.15654 | E15.5 * Wnt1 down vs E15.5 * Ctrl |
| 10390956 Krtap4-16     | NM_001013823 | 0.0114281    | -1.15685 | E15.5 * Wnt1 down vs E15.5 * Ctrl |
| 10421981 Dis3          | NM_028315    | 0.00838334   | -1.15704 | E15.5 * Wnt1 down vs E15.5 * Ctrl |
| 10585091 Nhp2l1        | NM_011482    | 0.0109708    | -1.1573  | E15.5 * Wnt1 down vs E15.5 * Ctrl |
| 10401637 Nek9          | NM_145138    | 0.000231048  | -1.15738 | E15.5 * Wnt1 down vs E15.5 * Ctrl |
| 10376230 G3bp1         | NM_013716    | 0.00582377   | -1.15746 | E15.5 * Wnt1 down vs E15.5 * Ctrl |
| 10461108 Iscu          | NM_025526    | 0.00361596   | -1.15882 | E15.5 * Wnt1 down vs E15.5 * Ctrl |
| 10444800 Nhp2l1        | NM_011482    | 0.0106582    | -1.16021 | E15.5 * Wnt1 down vs E15.5 * Ctrl |
| 10419198 Ero1l         | NM_015774    | 0.00627169   | -1.16057 | E15.5 * Wnt1 down vs E15.5 * Ctrl |
| 10564377 Lrrk1         | NM_146191    | 0.0147516    | -1.16068 | E15.5 * Wnt1 down vs E15.5 * Ctrl |
| 10597575 Plcd1         | NM_019676    | 0.0133987    | -1.16069 | E15.5 * Wnt1 down vs E15.5 * Ctrl |
| 10505734 Adamtsl1      | NM_029967    | 0.0104274    | -1.16082 | E15.5 * Wnt1 down vs E15.5 * Ctrl |
| 10604340               | ---          | 0.0132164    | -1.16111 | E15.5 * Wnt1 down vs E15.5 * Ctrl |
| 10529330 Whsc2         | NM_011914    | 0.0145476    | -1.16117 | E15.5 * Wnt1 down vs E15.5 * Ctrl |
| 10360985 Cenpf         | NM_001081363 | 0.0126095    | -1.16173 | E15.5 * Wnt1 down vs E15.5 * Ctrl |
| 10480064 Fbxo18        | NM_015792    | 0.000806914  | -1.16203 | E15.5 * Wnt1 down vs E15.5 * Ctrl |
| 10353878 Ankrd23       | NM_153502    | 0.00410173   | -1.16291 | E15.5 * Wnt1 down vs E15.5 * Ctrl |
| 10361007 Smyd2         | NM_026796    | 0.00477562   | -1.16359 | E15.5 * Wnt1 down vs E15.5 * Ctrl |
| 10394392 Nfyc          | NM_008692    | 0.0074999    | -1.16373 | E15.5 * Wnt1 down vs E15.5 * Ctrl |
| 10415660 Rpl13         | NM_016738    | 0.00391163   | -1.16391 | E15.5 * Wnt1 down vs E15.5 * Ctrl |
| 10489961 Nfatc2        | NM_010899    | 0.000561133  | -1.16425 | E15.5 * Wnt1 down vs E15.5 * Ctrl |
| 10585301 Rdx           | NM_009041    | 0.0119811    | -1.16456 | E15.5 * Wnt1 down vs E15.5 * Ctrl |
| 10434675 Dnajb11       | NM_026400    | 0.00948006   | -1.16466 | E15.5 * Wnt1 down vs E15.5 * Ctrl |
| 10596263               | ---          | 0.00975188   | -1.16498 | E15.5 * Wnt1 down vs E15.5 * Ctrl |
| 10493816 S100a5        | NM_011312    | 0.0112749    | -1.16511 | E15.5 * Wnt1 down vs E15.5 * Ctrl |
| 10481900 Rabepk        | NM_145522    | 0.00266085   | -1.16545 | E15.5 * Wnt1 down vs E15.5 * Ctrl |
| 10588007 Tfdp2         | NM_178667    | 0.000290284  | -1.16555 | E15.5 * Wnt1 down vs E15.5 * Ctrl |
| 10522445 Spata18       | NM_178387    | 0.00102425   | -1.16556 | E15.5 * Wnt1 down vs E15.5 * Ctrl |
| 10420596 Tnfrsf19      | NM_013869    | 0.00735764   | -1.16585 | E15.5 * Wnt1 down vs E15.5 * Ctrl |

|          |               |              |              |          |                                   |
|----------|---------------|--------------|--------------|----------|-----------------------------------|
| 10473414 | Ssrp1         | NM_182990    | 0.00443582   | -1.16592 | E15.5 * Wnt1 down vs E15.5 * Ctrl |
| 10404578 | Cdyl          | NM_009881    | 0.0120796    | -1.16663 | E15.5 * Wnt1 down vs E15.5 * Ctrl |
| 10496629 | 15-Sep        | NM_053102    | 0.00141813   | -1.16669 | E15.5 * Wnt1 down vs E15.5 * Ctrl |
| 10410124 | Ctsl          | NM_009984    | 0.002375     | -1.16684 | E15.5 * Wnt1 down vs E15.5 * Ctrl |
| 10541482 | Nhp2l1        | NM_011482    | 0.0121739    | -1.1669  | E15.5 * Wnt1 down vs E15.5 * Ctrl |
| 10444068 | Tapbp         | NM_001025313 | 0.012178     | -1.16712 | E15.5 * Wnt1 down vs E15.5 * Ctrl |
| 10430006 | Slc39a4       | NM_028064    | 0.0067048    | -1.16724 | E15.5 * Wnt1 down vs E15.5 * Ctrl |
| 10598369 | Prickle3      | NM_175097    | 0.00300698   | -1.16725 | E15.5 * Wnt1 down vs E15.5 * Ctrl |
| 10398173 | Vrk1          | NM_011705    | 0.00236891   | -1.16768 | E15.5 * Wnt1 down vs E15.5 * Ctrl |
| 10585842 | Nptn          | NM_009145    | 0.00820841   | -1.16776 | E15.5 * Wnt1 down vs E15.5 * Ctrl |
| 10501179 | Rpl13         | NM_016738    | 0.00210973   | -1.16802 | E15.5 * Wnt1 down vs E15.5 * Ctrl |
| 10426891 | Mettl7a1      | NM_027334    | 0.00572784   | -1.16809 | E15.5 * Wnt1 down vs E15.5 * Ctrl |
| 10539104 | 0610030E20Rik | NM_026696    | 0.00612038   | -1.1688  | E15.5 * Wnt1 down vs E15.5 * Ctrl |
| 10596231 | Dnajc13       | AB093258     | 0.00717089   | -1.16931 | E15.5 * Wnt1 down vs E15.5 * Ctrl |
| 10463751 | Pdcd11        | NM_011053    | 0.014405     | -1.16943 | E15.5 * Wnt1 down vs E15.5 * Ctrl |
| 10420694 | Ints6         | NM_008715    | 0.00072262   | -1.16952 | E15.5 * Wnt1 down vs E15.5 * Ctrl |
[truncated: 2,702,231 more chars]
